# Supplementary material for: Pathway-based dissection of the genomic heterogeneity of cancer hallmarks’ acquisition with SLAPenrich
Source: Springer Nature journal article supplement (doi:10.1038/s41598-018-25076-6), 2018-04-24

# **Pathway-based dissection of the genomic heterogeneity of cancer hallmarks' acquisition with SLAPenrich**

Francesco Iorio, Luz Garcia-Alonso, Jonathan S. Brummel, Inigo Martincorena, David R. Wille, Ultan McDermott, and Julio Saez-Rodriguez

**Supplementary Results**

## Color legend:

|                                    |
|------------------------------------|
| Sustaining Proliferative Signaling |
| Evading Growth Suppressors         |
| Avoiding Immune Destruction        |
| Enabling Replicative Immortality   |
| Tumour-Promoting Inflammation      |
| Activating Invasion and Metastasis |
| Inducing Angiogenesis              |
| Genome Instability and Mutation    |
| Resisting Cell Death               |
| Deregulating Cellular Energetics   |

# BRCA

**Collagen Degradation**  
FDR = 1.1%, FDR nod = 2.2%

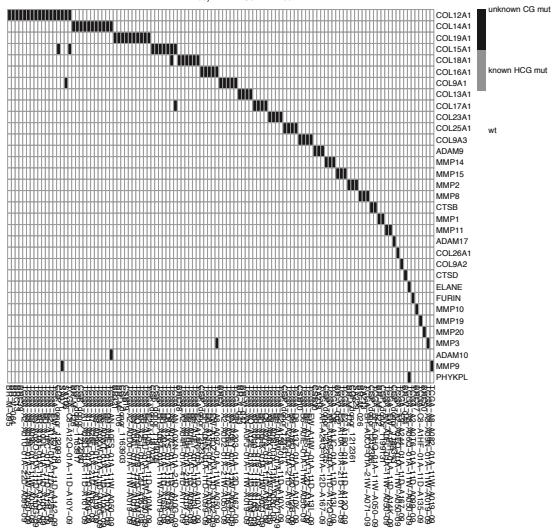

**HDACs Deacetylate Histones**  
FDR = 1.6e-10%, FDR nod = 0.066%

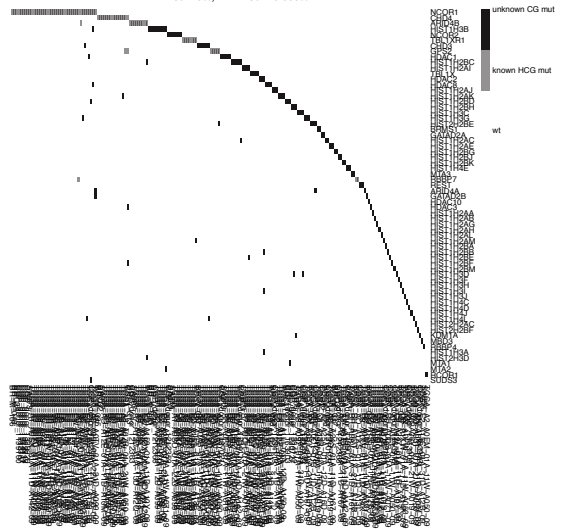

**Regulation Of Insulin Secretion**  
FDR = 0.57%, FDR nod = 1.2%

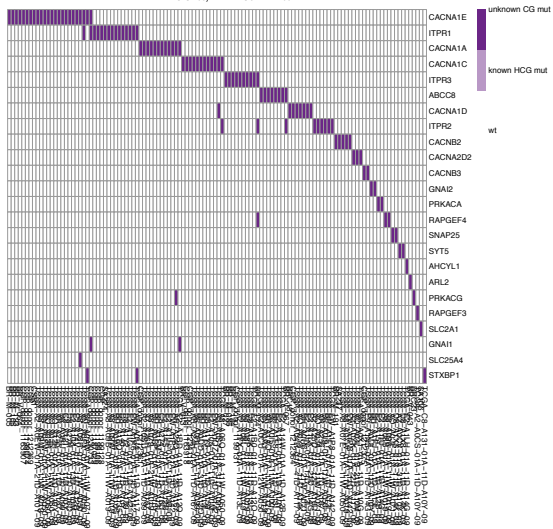

**DNA Damage/Telomere Stress Induced Senescence**  
FDR = 7e-12%, FDR nod = 0.0024%

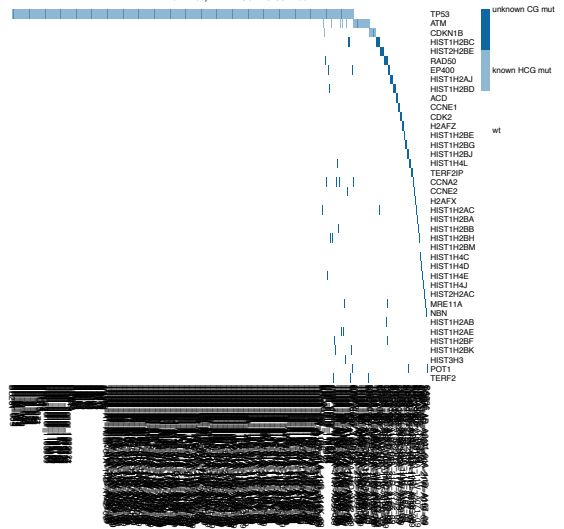

**Packaging Of Telomere Ends**  
FDR = 1.3e-10%, FDR nod = 1.2e-09%

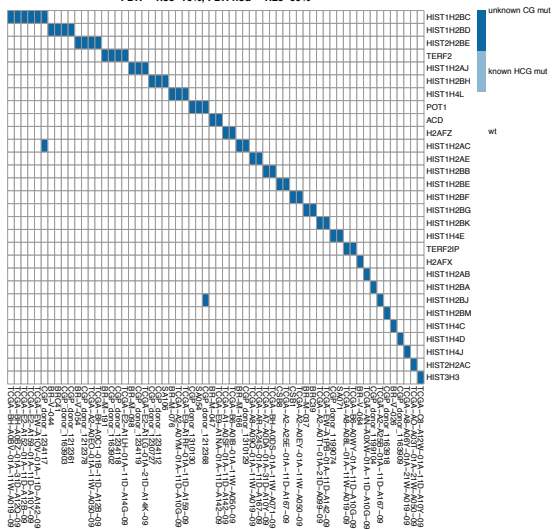

**Senescence Associated Secretory Phenotype (SASP)**  
FDR = 0.00031%, FDR nod = 0.016%

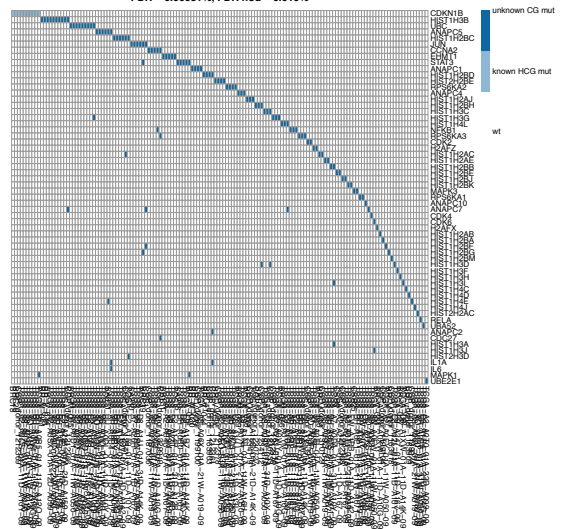

**G2/M DNA Damage Checkpoint**  
Processing Of DNA Double Strand Break Ends  
FDR = 7e-12%, FDR nod = 1.1%

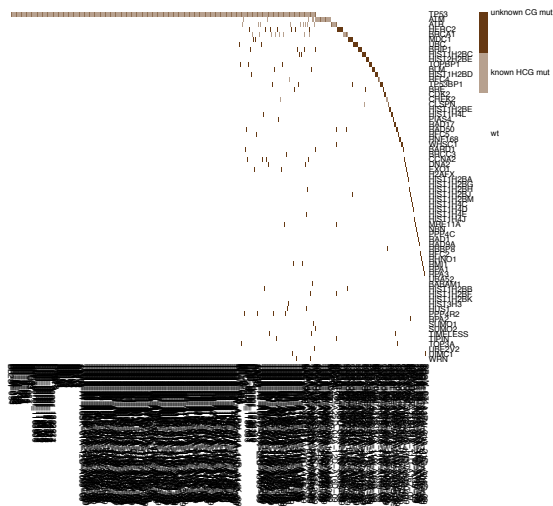

**DNA Damage/Telomere Stress Induced Senescence**  
FDR = 7e-12%, FDR nod = 0.0024%

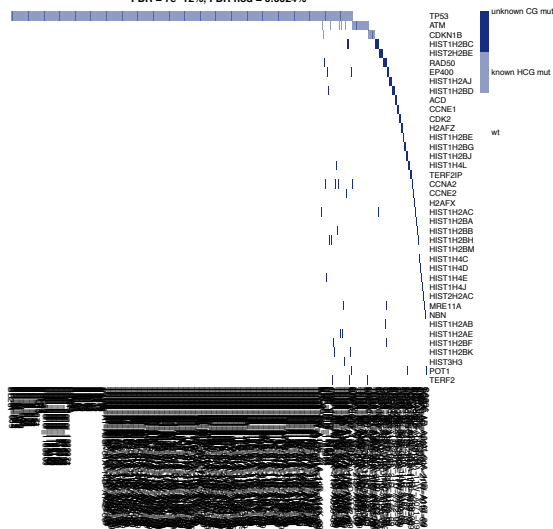

**G2/M DNA Damage Checkpoint**  
Processing Of DNA Double Strand Break Ends  
FDR = 7e-12%, FDR nod = 1.1%

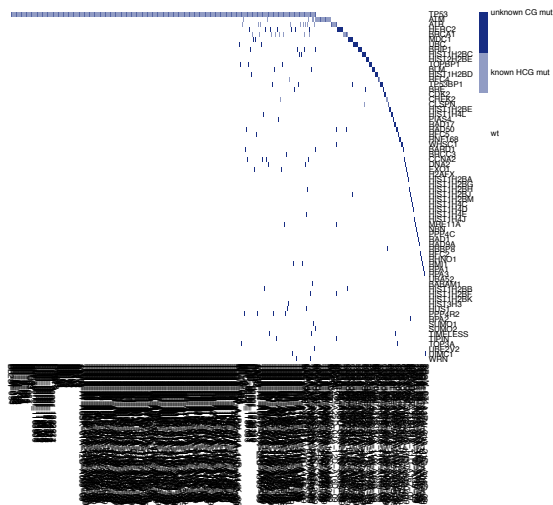

**Meiotic Recombination**  
FDR = 8.1e-12%, FDR nod = 3.6e-06%

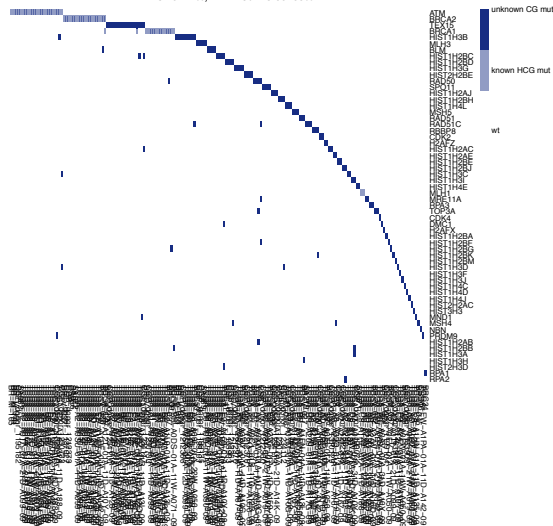

**Meiotic Synapsis**  
FDR = 7.3e-12%, FDR nod = 6.3e-10%

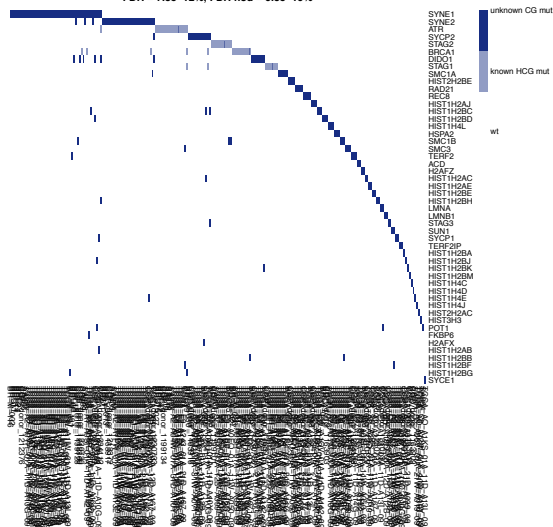

**Integrins In Angiogenesis**  
FDR = 7e-12%, FDR nod = 1.4%

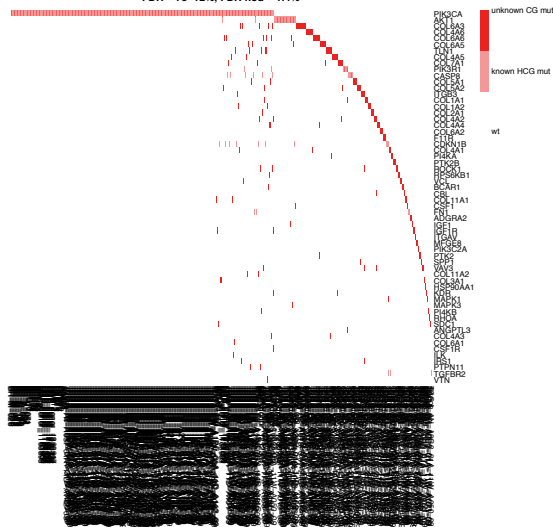

**Signaling By PDGF**  
FDR = 0.0026%, FDR nod = 0.0058%

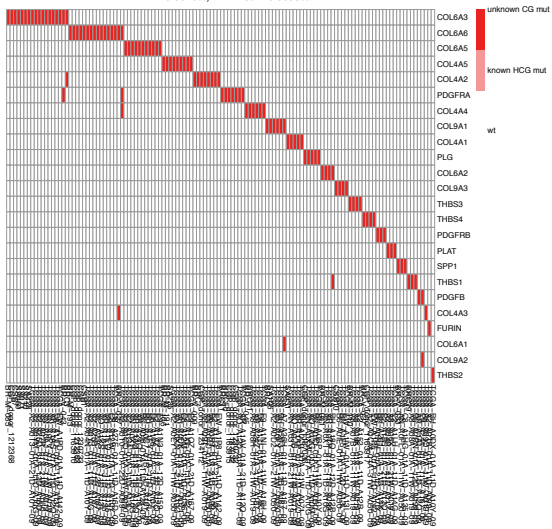

**Wnt Signaling Pathway**  
FDR = 1.4e-09%, FDR nod = 0.00094%

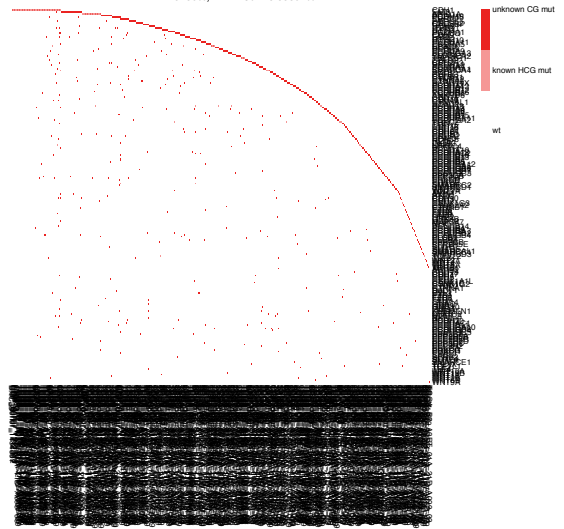

**G2/M DNA Damage Checkpoint**  
Processing Of DNA Double Strand Break Ends  
FDR = 7e-12%, FDR nod = 1.1%

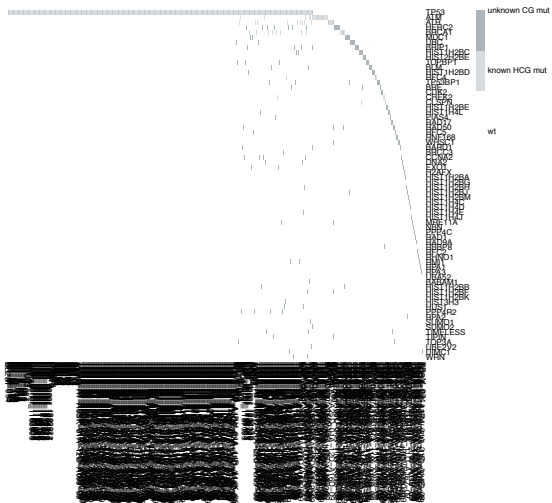

**Constitutive Signaling By Aberrant PI3K In Cancer**  
FDR = 7.3e-12%, FDR nod = 2.8%

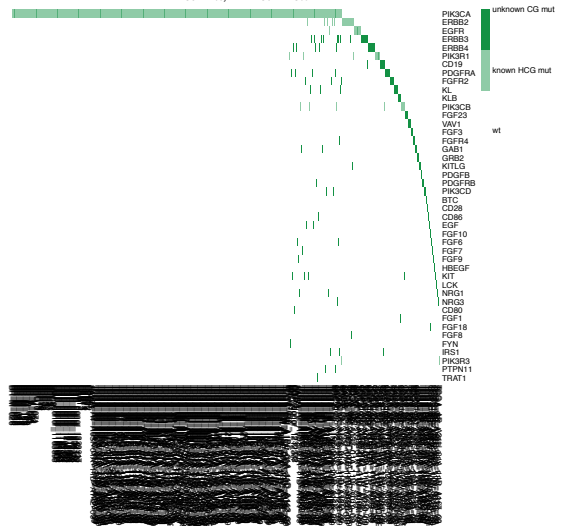

**GRB2:SOS Provides Linkage To MAPK Signaling For Integrins**  
FDR = 1.9%, FDR nod = 1.3%

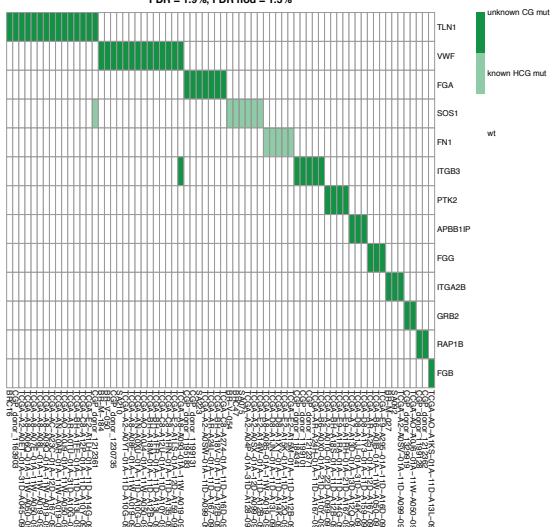

**Integrin Signalling Pathway**  
FDR = 7e-12%, FDR nod = 0.95%

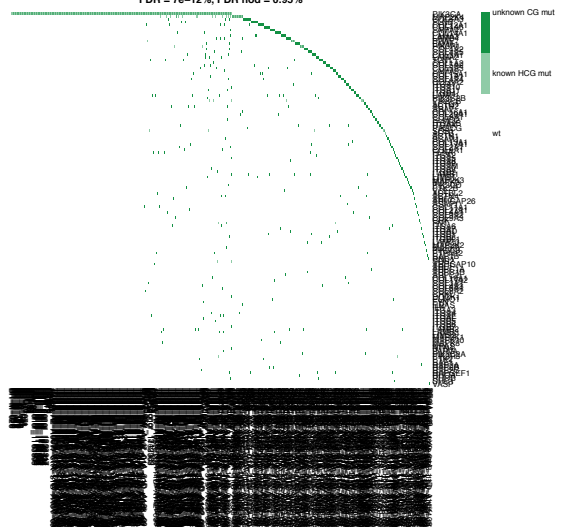



**COREAD**

**Activation Of Matrix Metalloproteinases**  
 FDR = 0.003%, FDR nod = 0.0023%

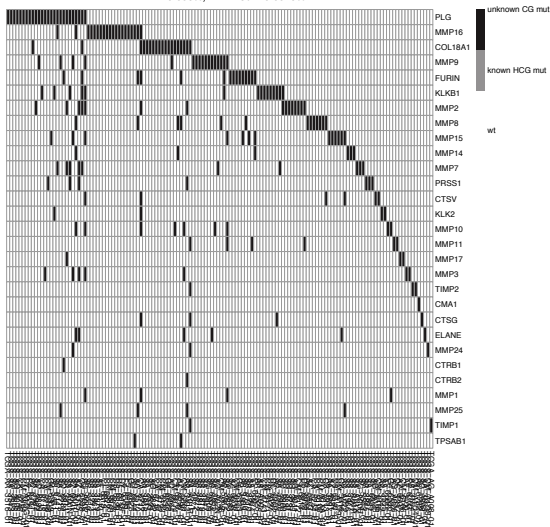

**Collagen Degradation**  
 FDR = 0.054%, FDR nod = 0.028%

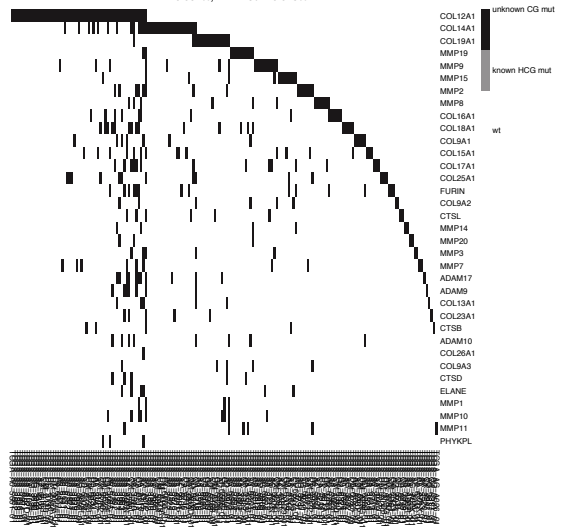

**E Cadherin Signaling In Keratinocytes**  
 FDR = 1.9e-12%, FDR nod = 2e-04%

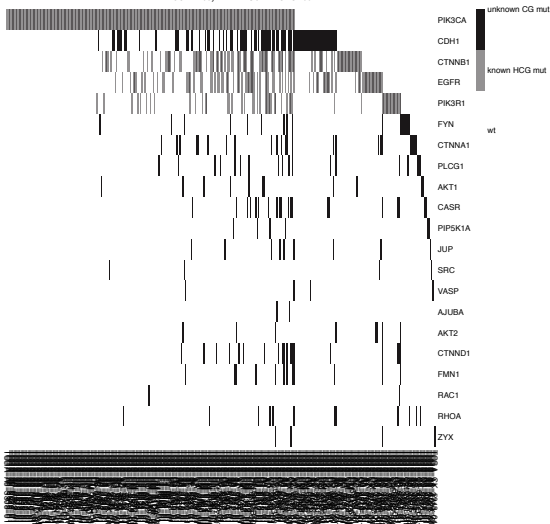

**EPHA2 Forward Signaling**  
 FDR = 1.9e-12%, FDR nod = 5.3e-06%

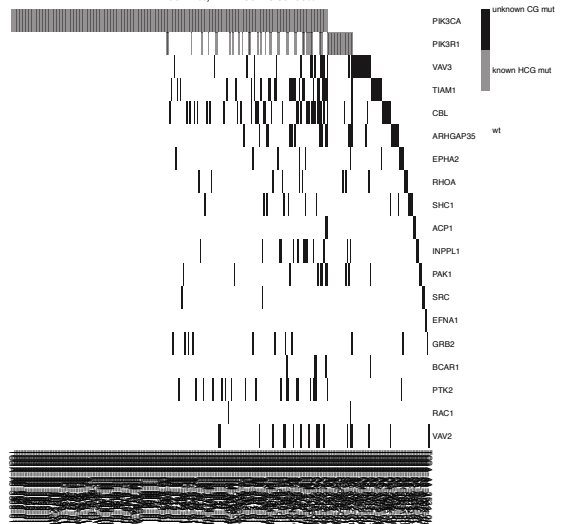

**Ephrin B Reverse Signaling**  
 FDR = 1.9e-12%, FDR nod = 5.3e-06%

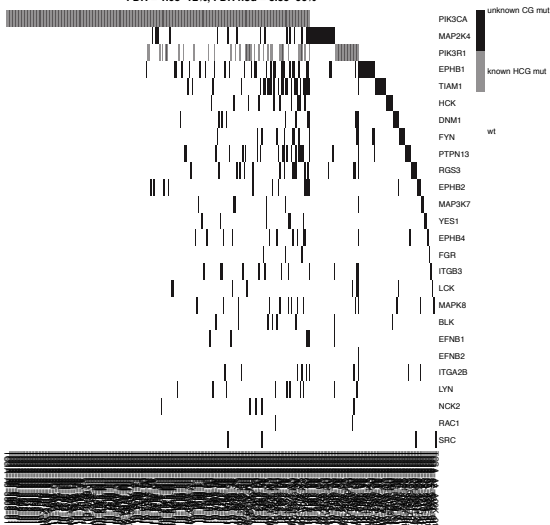

**PDGF Pathway**  
 FDR = 8.9e-10%, FDR nod = 0.0023%

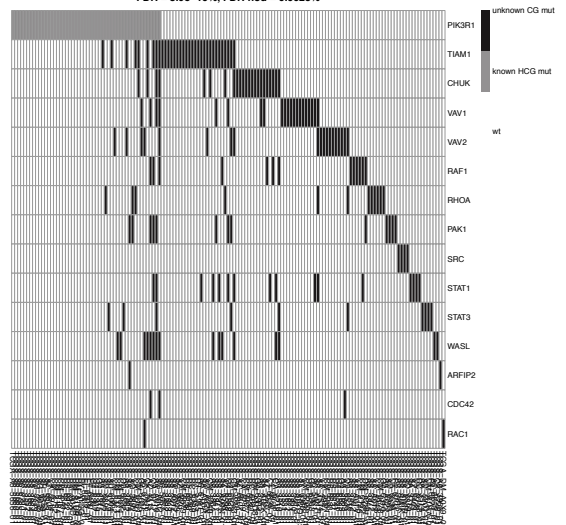

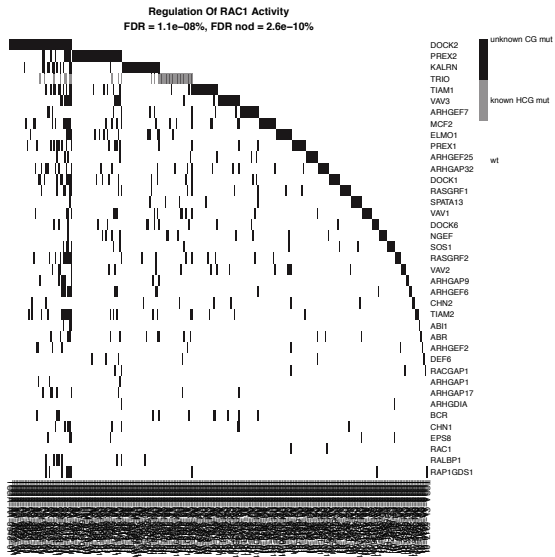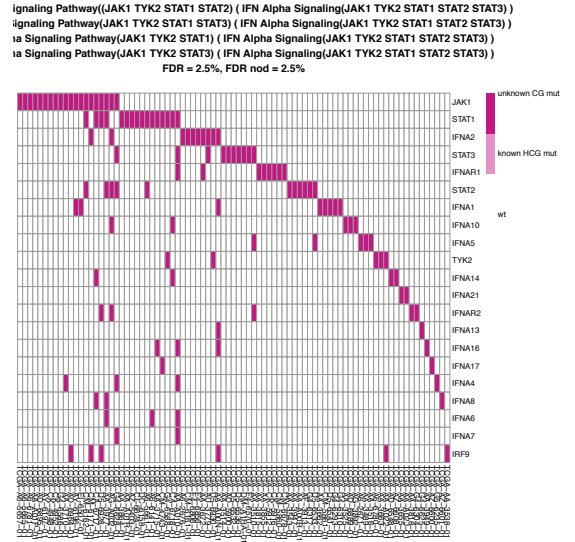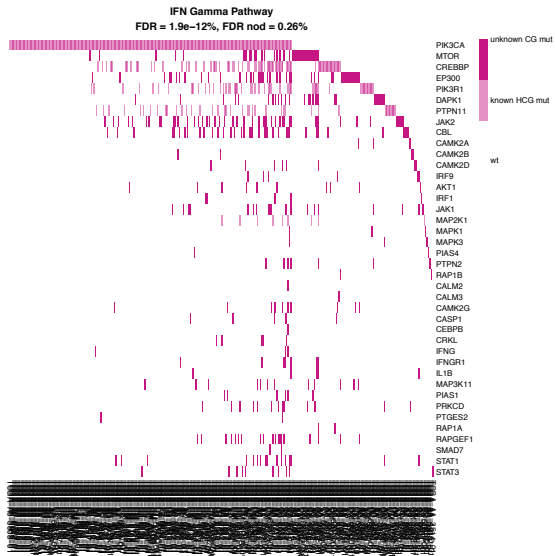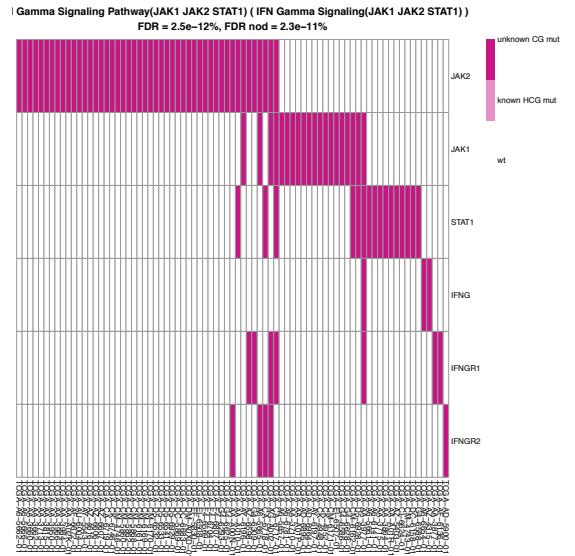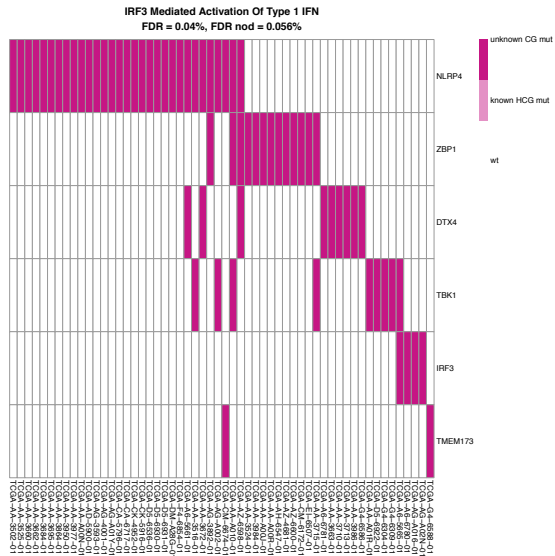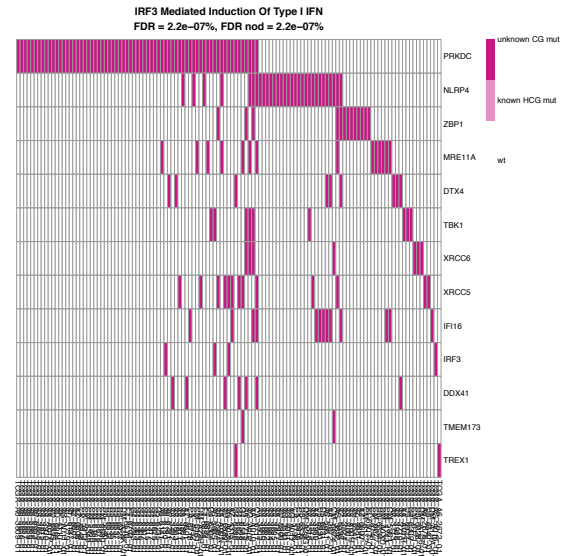

**LRR FLII Interacting Protein 1 (LRRFIP1) Activates Type I IFN Production**  
 FDR = 1.9e-12%, FDR nod = 0.021%

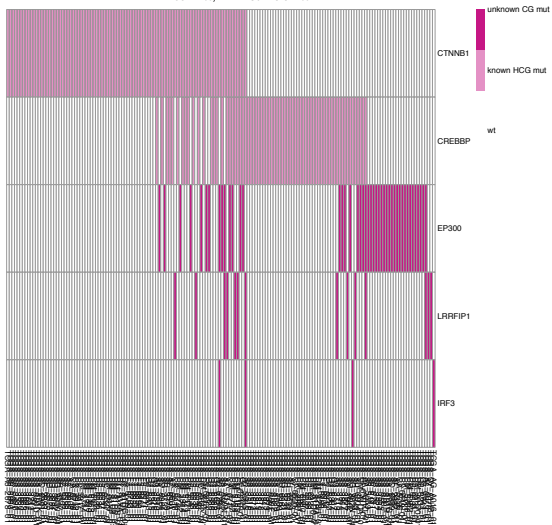

**Regulation Of IFNA Signaling**  
 FDR = 1.9e-07%, FDR nod = 0.54%

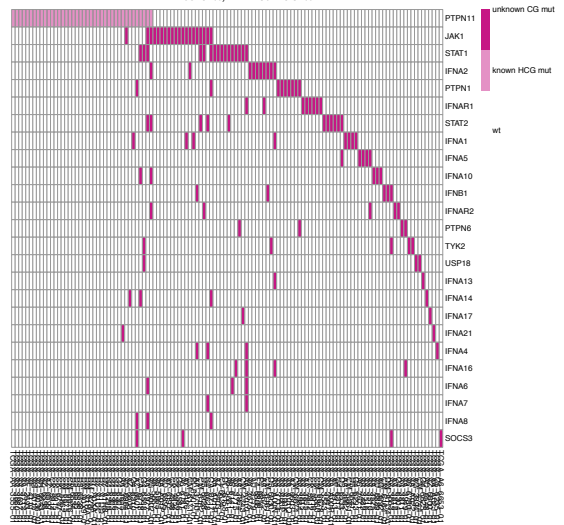

**Regulation Of IFNG Signaling**  
 FDR = 1.5e-11%, FDR nod = 0.0025%

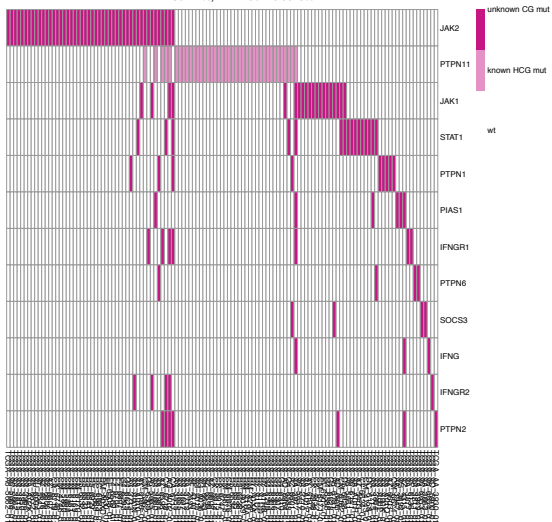

**RIG I/MDA5 Mediated Induction Of IFN Alpha/beta Pathways**  
 FDR = 0.8%, FDR nod = 0.78%

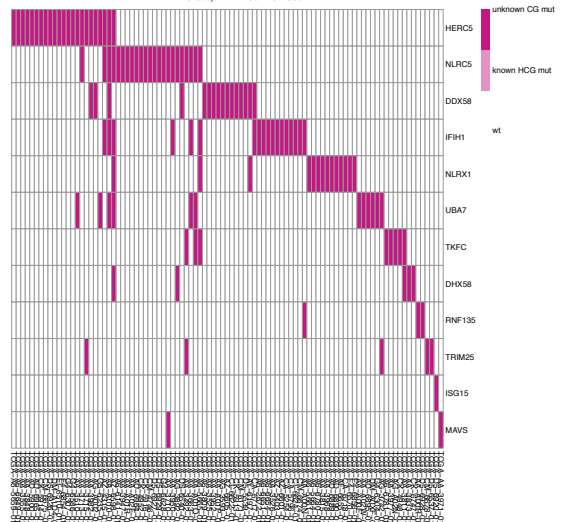

**Energy Dependent Regulation Of MTOR By LKB1 AMPK**  
 FDR = 4.4%, FDR nod = 3.2%

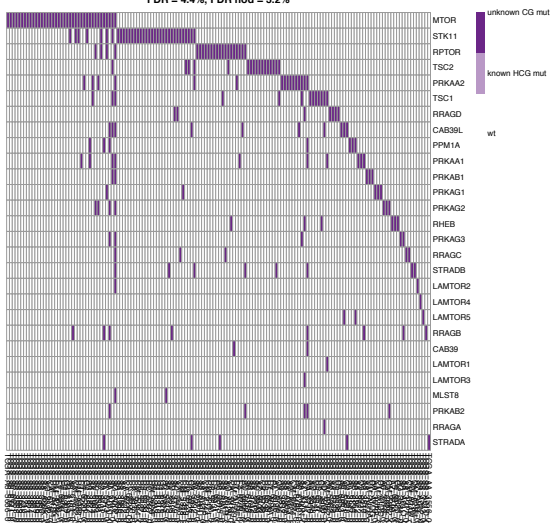

**Fatty Acids Bound To GPR40 (FFAR1) Regulate Insulin Secretion**  
 FDR = 0.56%, FDR nod = 0.64%

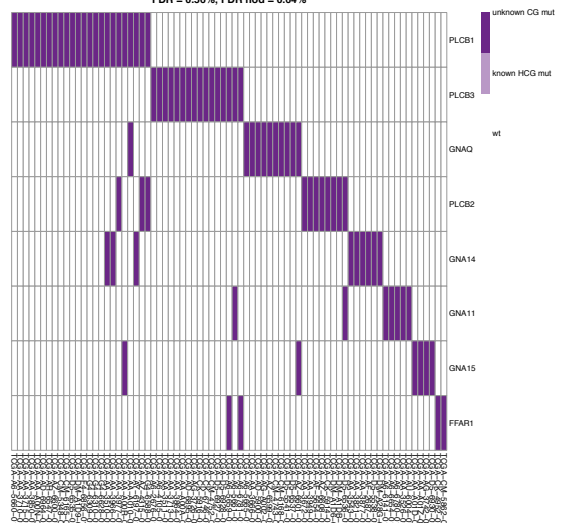

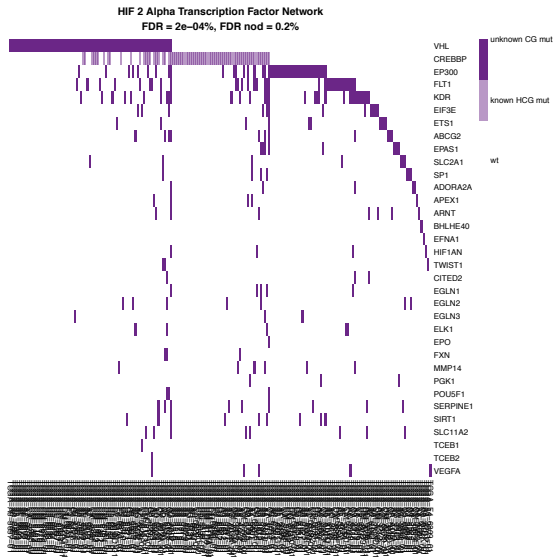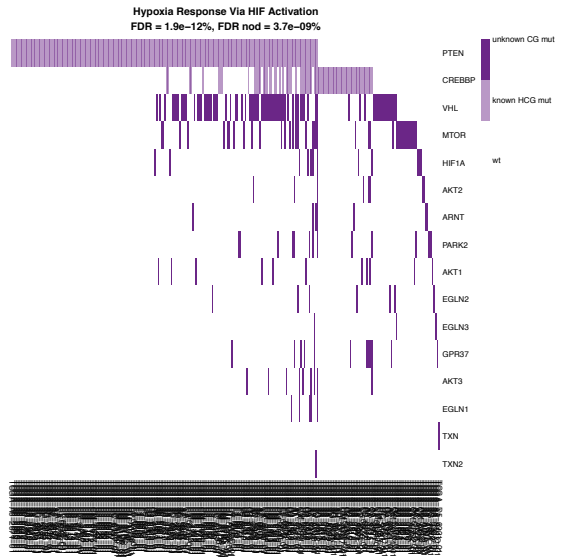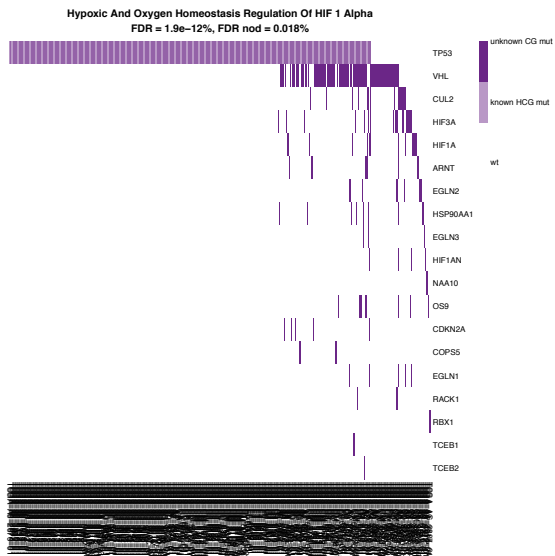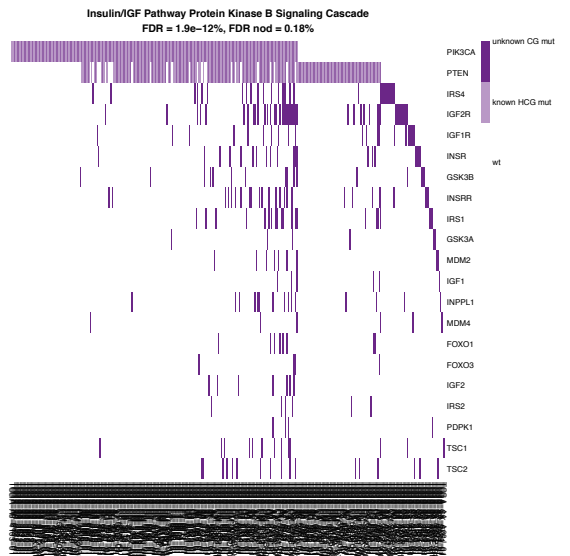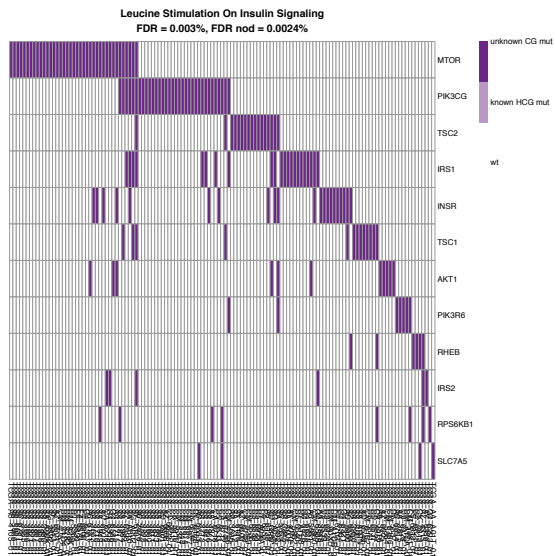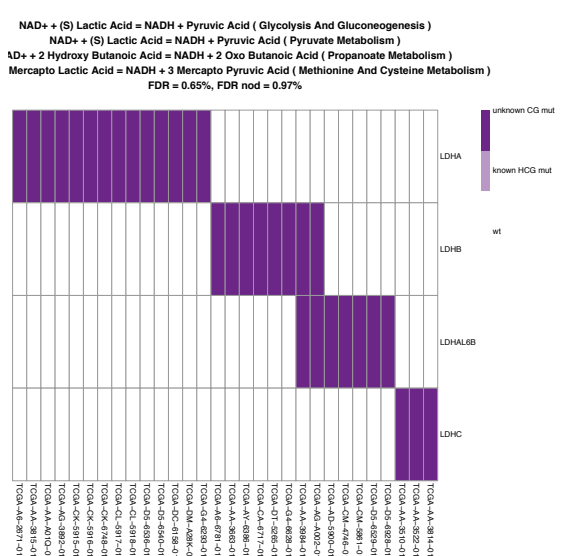

**PTK6 Promotes HIF1A Stabilization**  
 FDR = 2e-12%, FDR nod = 2.6e-08%

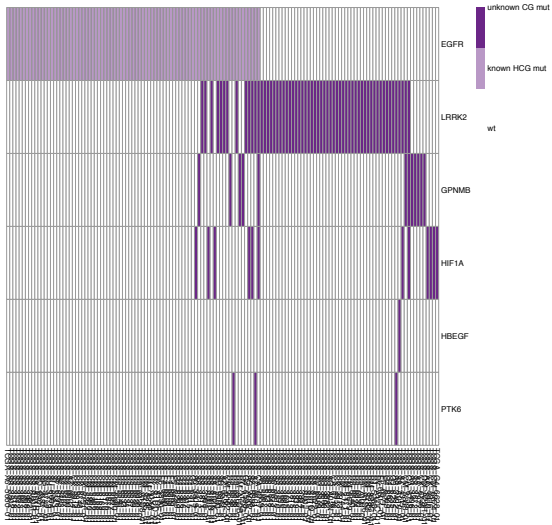

**DNA Damage/Telomere Stress Induced Senescence**  
 FDR = 1.9e-12%, FDR nod = 0.14%

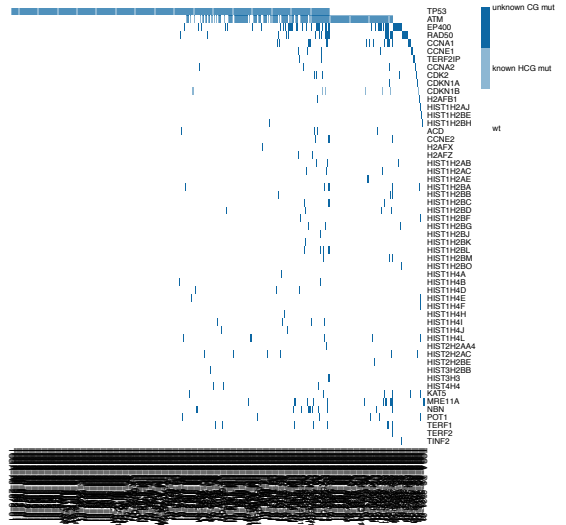

**Formation Of Senescence Associated Heterochromatin Foci (SAHF)**  
 FDR = 1.9e-12%, FDR nod = 2.3e-11%

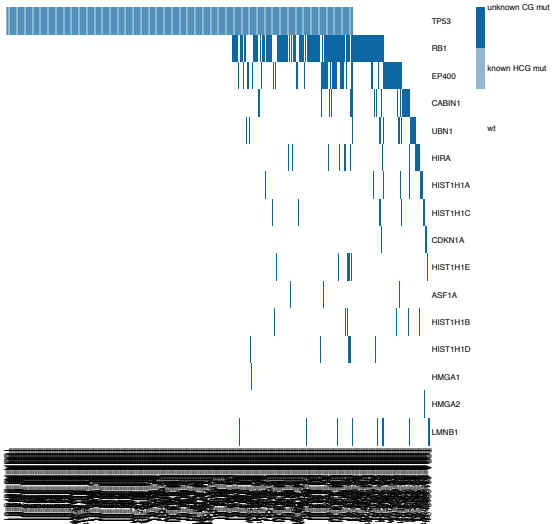

**Polymerase Switching**  
**Polymerase Switching On The C Strand Of The Telomere**  
 FDR = 4.4%, FDR nod = 4.6%

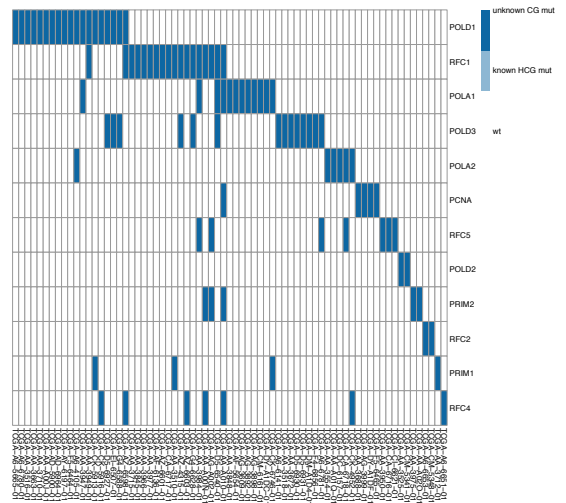

**Processive Synthesis On The C Strand Of The Telomere**  
**Telomere C Strand (Lagging Strand) Synthesis**  
 FDR = 1.9e-12%, FDR nod = 2.3e-11%

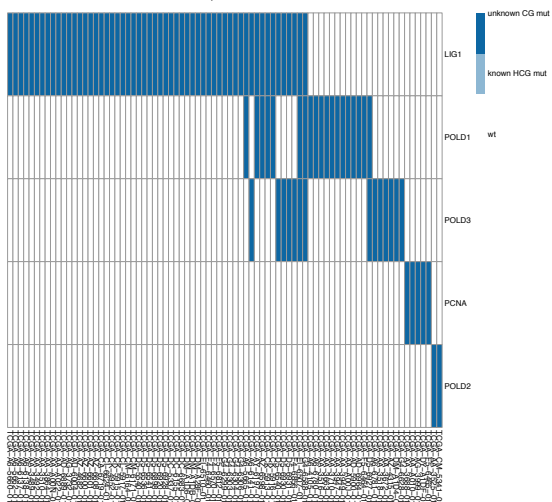

**Senescence And Autophagy In Cancer**  
 FDR = 1.9e-12%, FDR nod = 0.72%

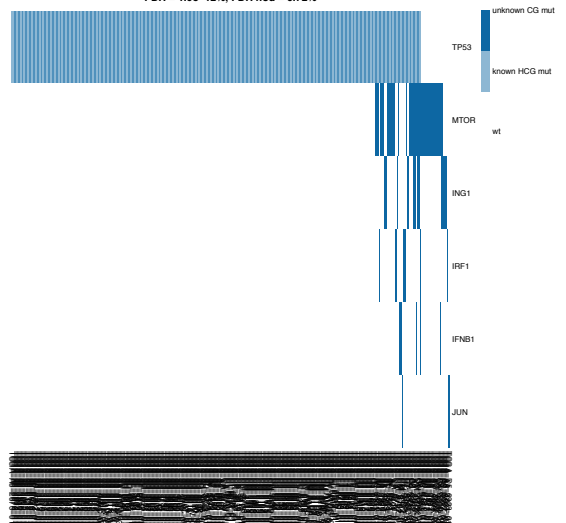

**Cyclin A:Cdk2 Associated Events At S Phase Entry**  
 FDR = 1.9e-12%, FDR nod = 2.3e-11%

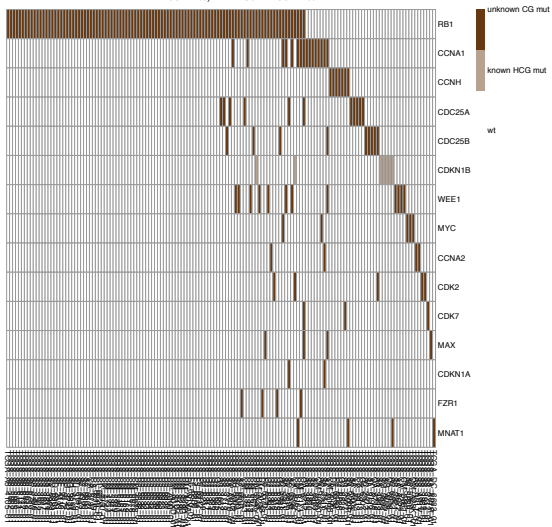

**Cyclin D Associated Events In G1**  
 FDR = 0.79%, FDR nod = 1.9%

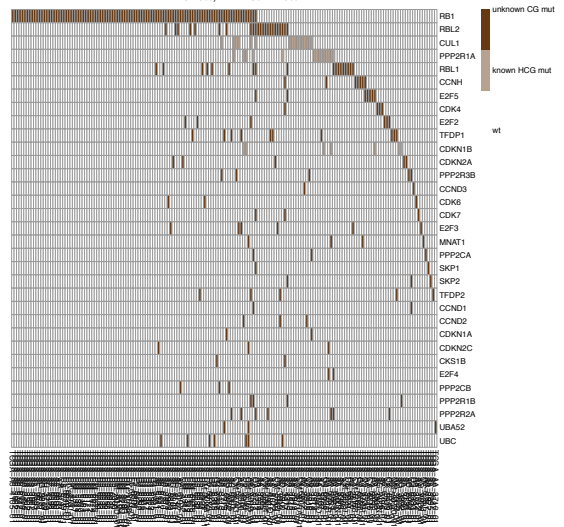

**Cyclin E Associated Events During G1/S Transition**  
 FDR = 1.9e-12%, FDR nod = 2.3e-11%

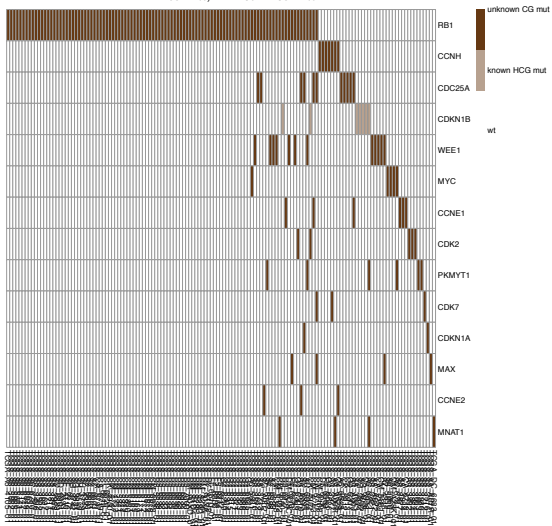

**G2/M DNA Damage Checkpoint Processing Of DNA Double Strand Break Ends**  
 FDR = 1.9e-12%, FDR nod = 4.6%

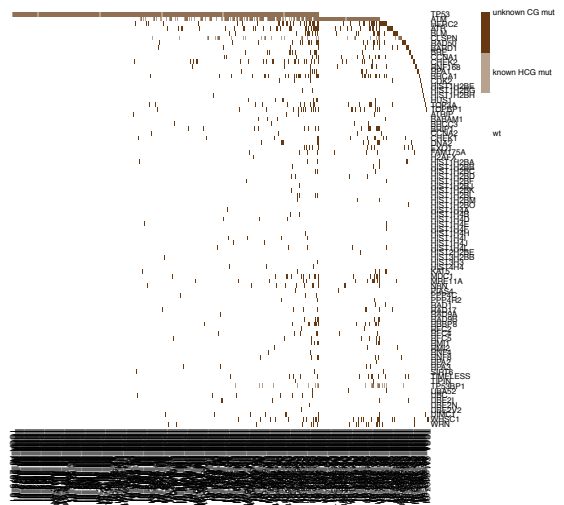

**Inhibition Of Replication Initiation Of Damaged DNA By RB1/E2F1**  
 FDR = 2e-12%, FDR nod = 2.3e-11%

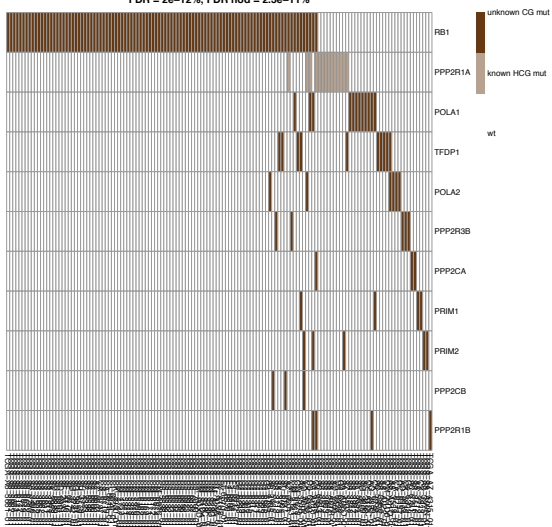

**PS3 Pathway**  
 FDR = 1.9e-12%, FDR nod = 0.0042%

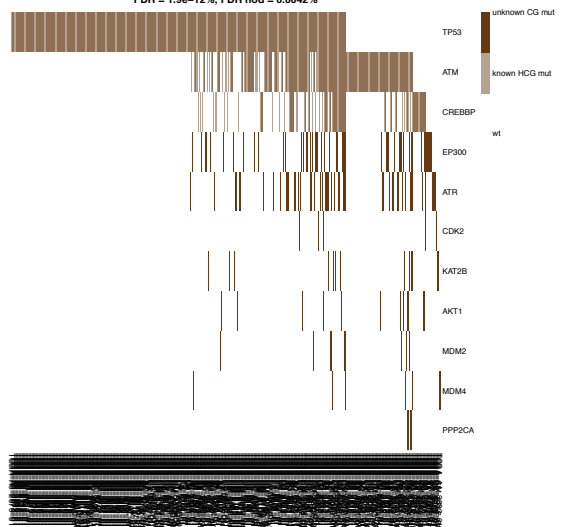

**P53 Pathway Feedback Loops 2**  
 FDR = 1.9e-12%, FDR nod = 6.9e-07%

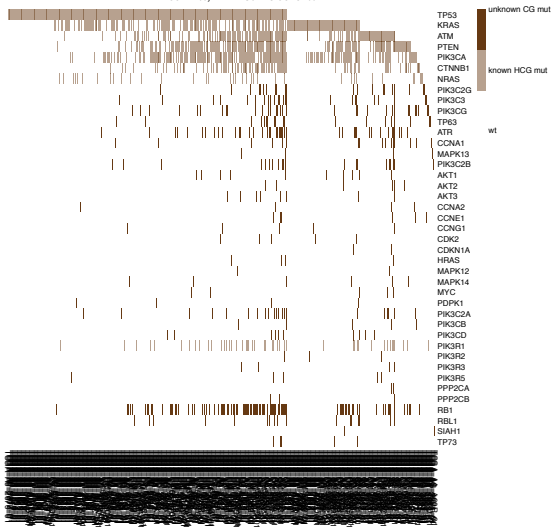

**Senescence And Autophagy In Cancer**  
 FDR = 1.9e-12%, FDR nod = 0.72%

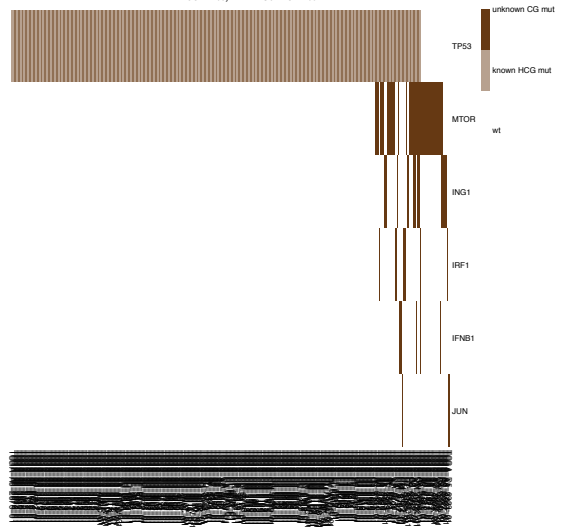

**SMAD2/SMAD3:SMAD4 Heterotrimer Regulates Transcription**  
 FDR = 1.9e-12%, FDR nod = 2.5%

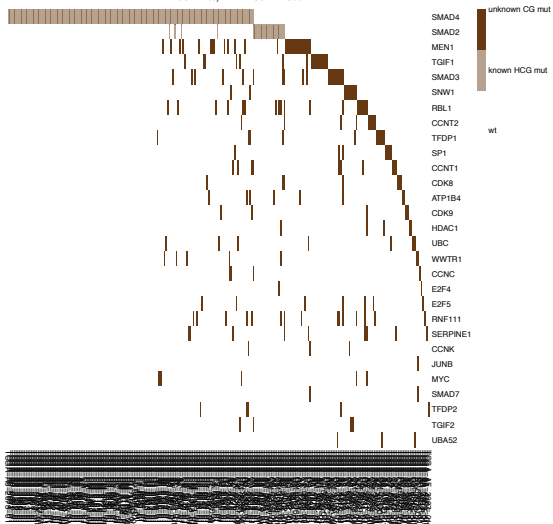

**The Reaction [[AHR Protein Binds To CDK4 Protein, CCND1 Protein] Results In Increased Phosphorylation Of RB1**  
 FDR = 1.9e-12%, FDR nod = 2.3e-11%

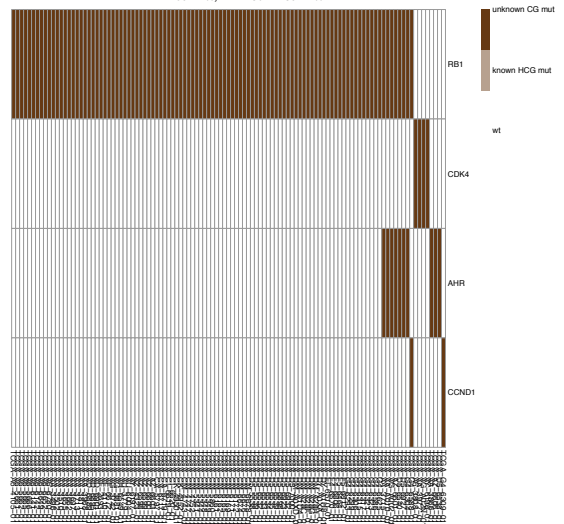

**TGF Beta Receptor Signaling Activates SMADs**  
 FDR = 1.9e-12%, FDR nod = 0.00021%

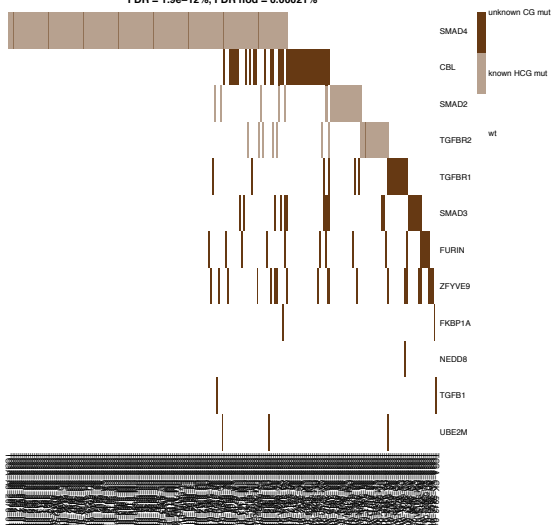

**ta Super Family Signaling Pathway(canonical) ( TGF Beta BMP Diagram(MolecularVariation) )**  
 FDR = 1.9e-12%, FDR nod = 0.31%

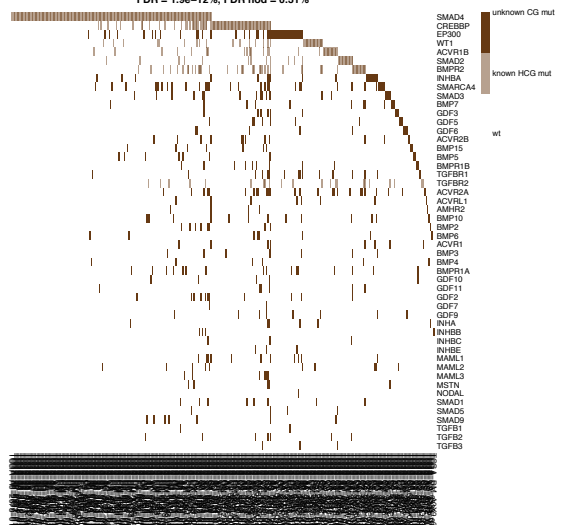

**TP53 Regulates Transcription Of Caspase Activators And Caspases**  
 FDR = 1.9e-12%, FDR nod = 1.1%

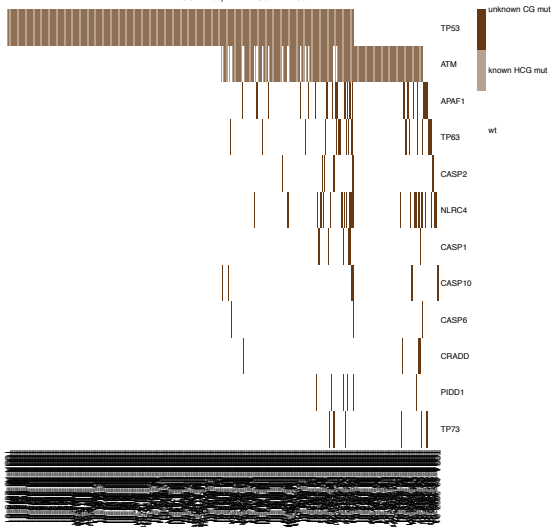

**TP53 Regulates Transcription Of Death Receptors And Ligands**  
 FDR = 1.9e-12%, FDR nod = 3.6%

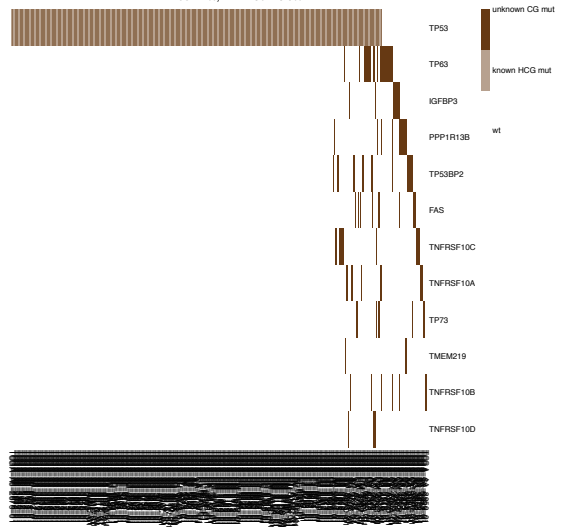

**TP53 Regulates Transcription Of Genes Involved In G2 Cell Cycle Arrest**  
 FDR = 1.9e-12%, FDR nod = 0.011%

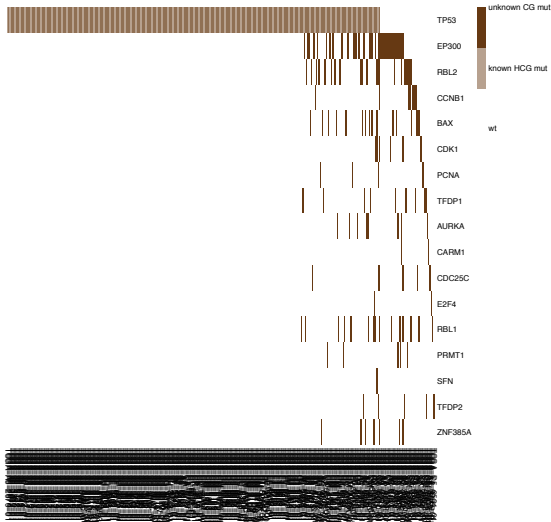

**ATF 2 Transcription Factor Network**  
 FDR = 7e-08%, FDR nod = 0.00047%

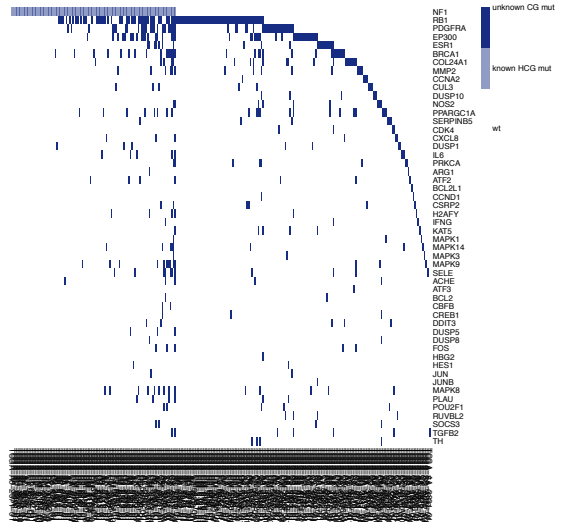

**ATR Signaling Pathway**  
 FDR = 8.7e-07%, FDR nod = 0.00038%

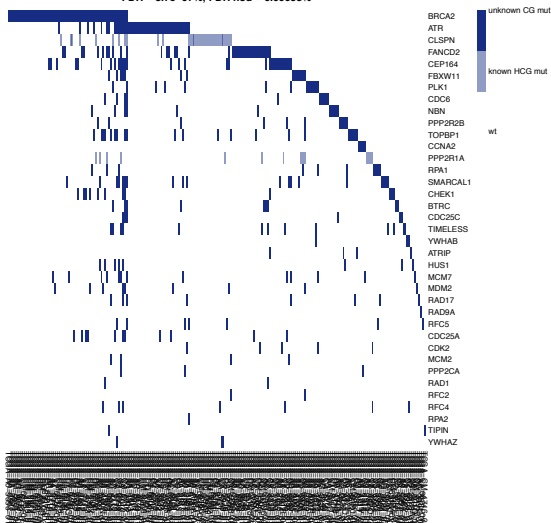

**BARD1 Signaling Events**  
 FDR = 1.9e-12%, FDR nod = 5.2e-05%

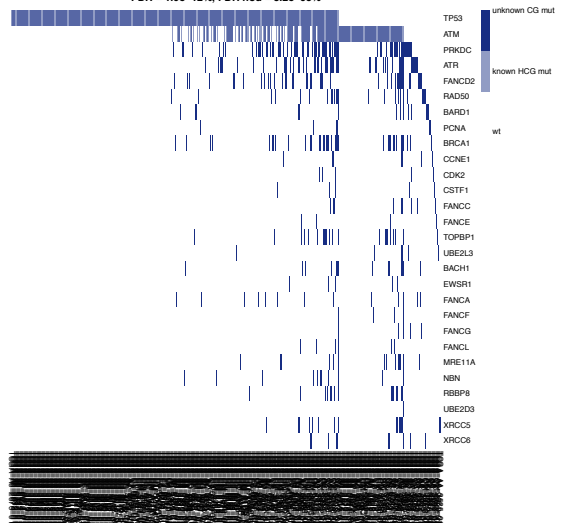





**[CGB Protein Results In Increased Activity Of LHCGR Protein]**  
**je Results In Decreased Activity Of PTGS2 Protein] Inhibits The Reaction [CGB Protein Results In Increased Chen**  
**(3, 2 F)quinazoline 1,3 Diamine Binds To F2R Protein] Promotes The Reaction [CGB Protein Results In Increased I**  
**ne Inhibits The Reaction [CGB Protein Results In Increased Chemical Synthesis Of Androgens]**  
**itrazine Inhibits The Reaction [CGB Protein Results In Increased Secretion Of Cyclic AMP]**  
**orsin Promotes The Reaction [CGB Protein Results In Increased Abundance Of Cyclic AMP]**  
**Reaction [[Gonadotropins, Equine Co Treated With CGB Protein] Results In Increased Abundance Of Progesterone**  
**inhibits The Reaction [[CGB Protein Co Treated With Colforsin] Results In Increased Abundance Of Cyclic AMP]**  
**rotein Promotes The Reaction [CGB Protein Results In Increased Abundance Of Progesterone]**  
**se Metabolite Inhibits The Reaction [CGB Protein Results In Increased Abundance Of Testosterone]**  
**se Chloride Inhibits The Reaction [CGB Protein Results In Increased Expression Of STAR Protein]**  
**terone Promotes The Reaction [CGB Protein Results In Increased Expression Of VEGFA MRNA]**  
**one Enanthate Inhibits The Reaction [CGB Protein Results In Increased Abundance Of Androgens]**  
**FDR = 0.0063%, FDR nod = 0.012%**

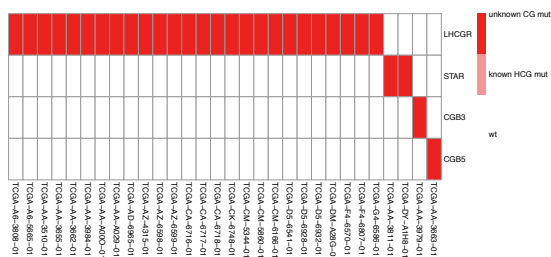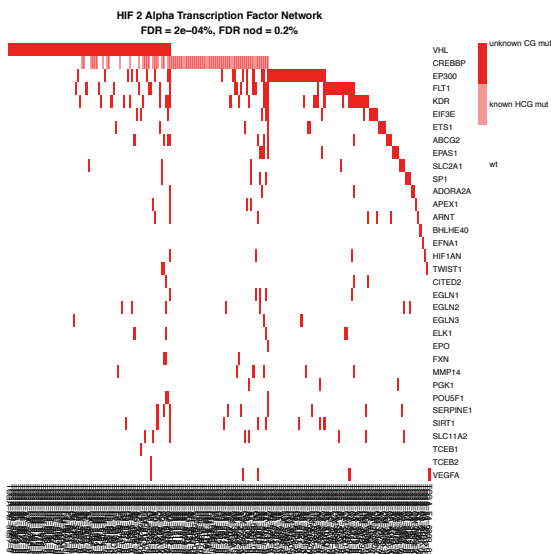

**Hypoxia Response Via HIF Activation**  
**FDR = 1.9e-12%, FDR nod = 3.7e-09%**

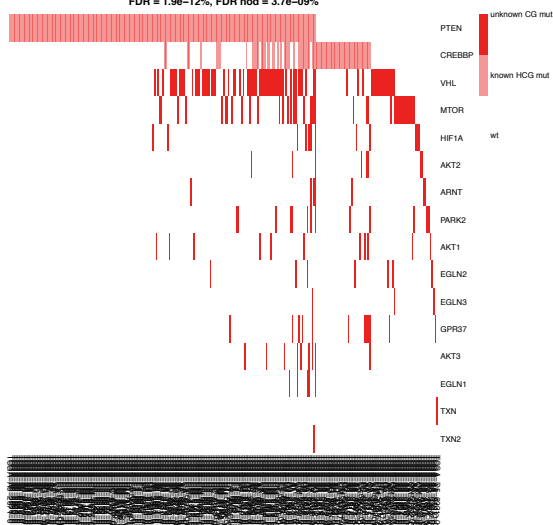

**Hypoxic And Oxygen Homeostasis Regulation Of HIF 1 Alpha**  
**FDR = 1.9e-12%, FDR nod = 0.018%**

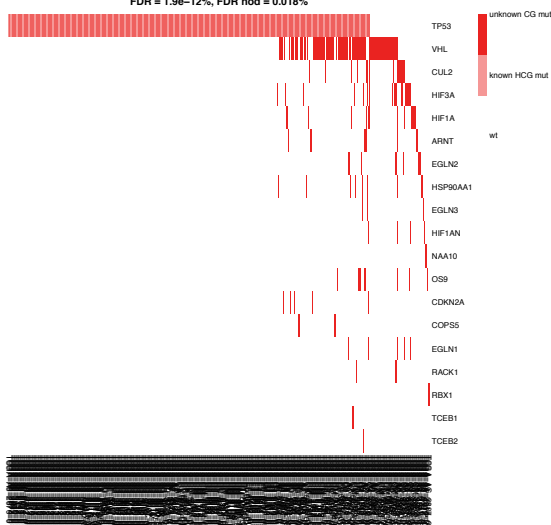

**JNK Cascade ( EGF Signaling Pathway Diagram )**  
**JNK Cascade ( PDGF Signaling Pathway )**  
**FDR = 0.00054%, FDR nod = 0.0011%**

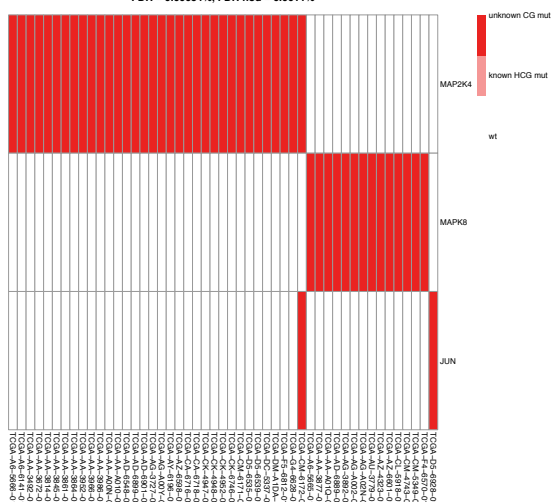

**Neurophilin Interactions With VEGF And VEGFR**  
**FDR = 0.68%, FDR nod = 0.78%**

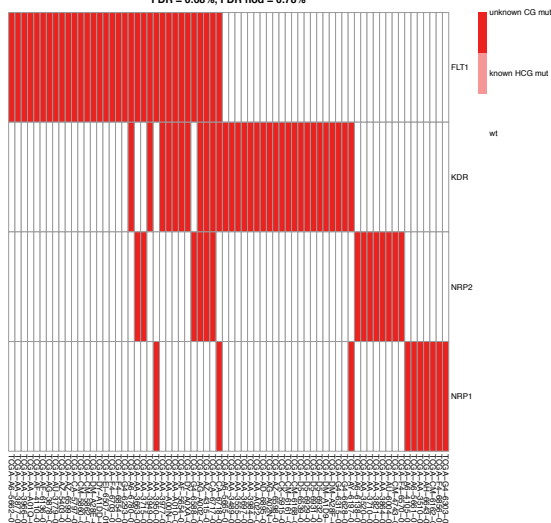

**Oxygen Dependent Proline Hydroxylation Of Hypoxia Inducible Factor Alpha**  
 FDR = 0.01%, FDR nod = 0.0092%

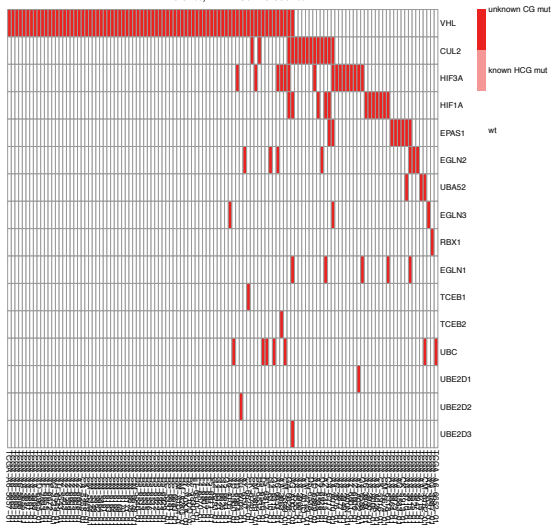

**PDGF Pathway**  
 FDR = 8.9e-10%, FDR nod = 0.0023%

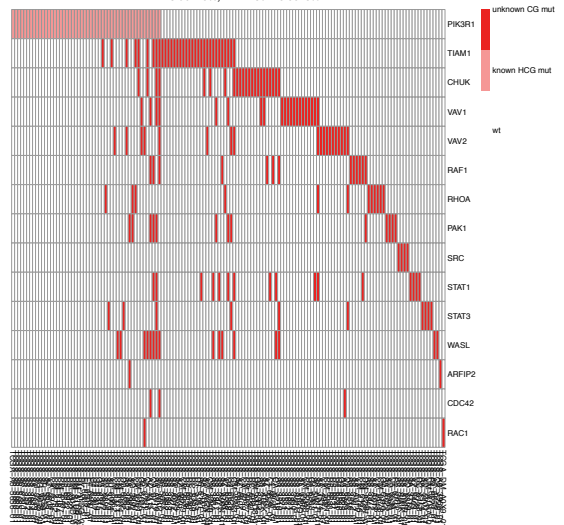

**PDGF Receptor Signaling Network**  
 FDR = 7e-08%, FDR nod = 1.2e-07%

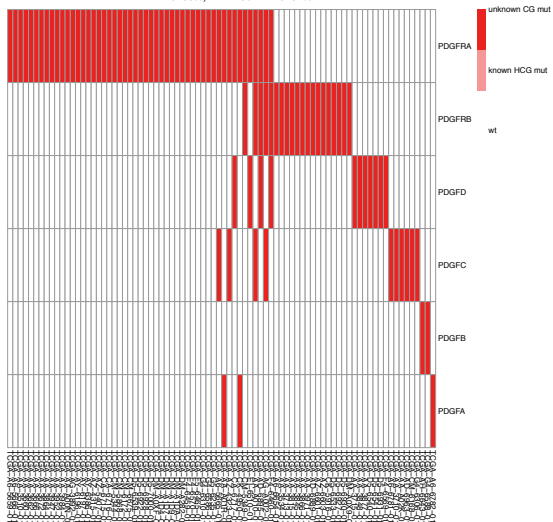

**PDGF Signaling Pathway ( PDGF Signaling Pathway )**  
 FDR = 1.9e-12%, FDR nod = 0.00016%

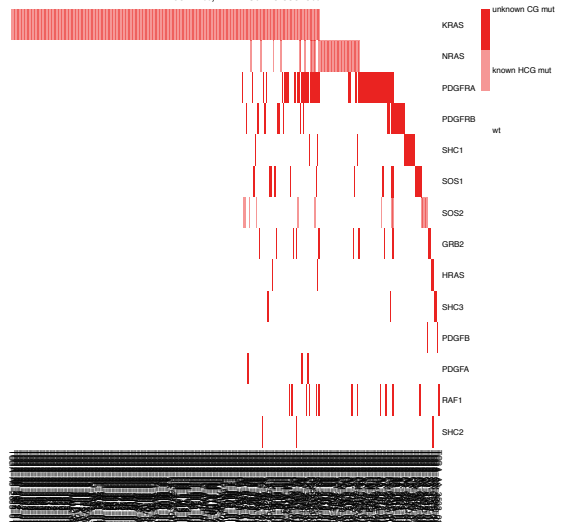

**PDGF Signaling Pathway (Mammal) ( PDGF Signaling Pathway )**  
 FDR = 1.9e-12%, FDR nod = 0.16%

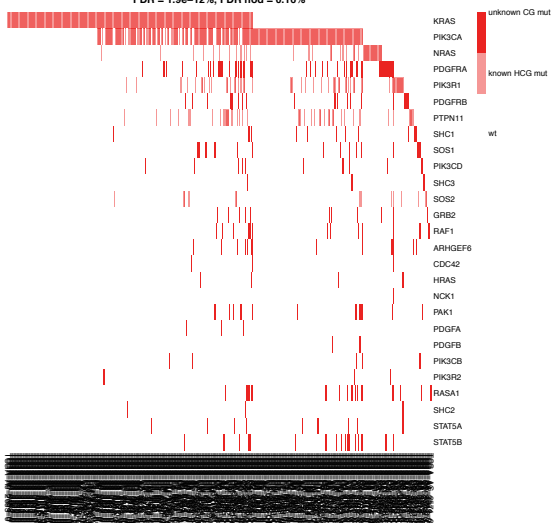

**PDGFR Alpha Signaling Pathway**  
 FDR = 1.9e-12%, FDR nod = 0.0023%

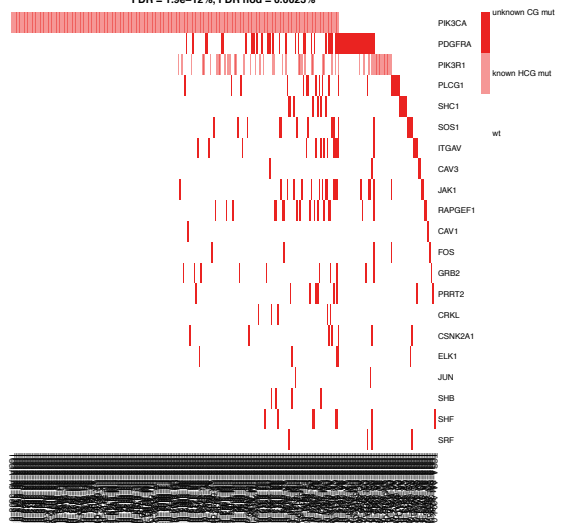

**PTK6 Promotes HIF1A Stabilization**  
 FDR = 2e-12%, FDR nod = 2.6e-08%

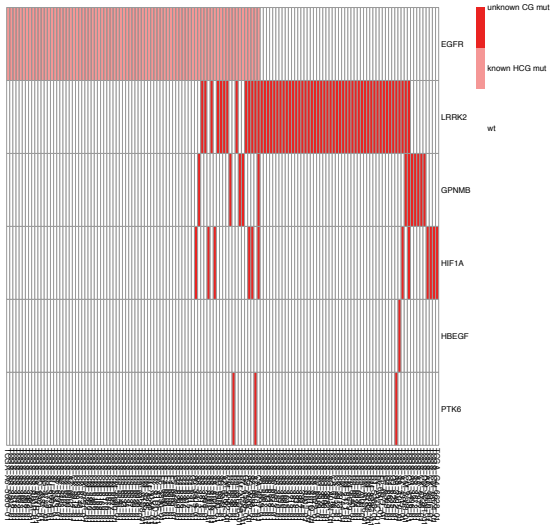

**Regulation Of Gene Expression By Hypoxia Inducible Factor**  
 FDR = 4.9e-09%, FDR nod = 1.8%

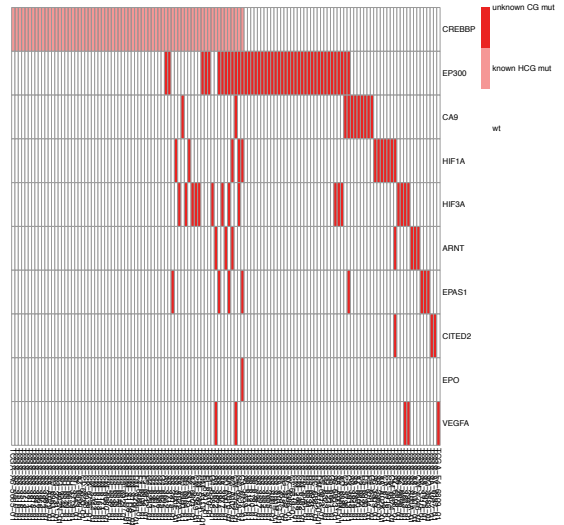

**Signaling By PDGF**  
 FDR = 1.9e-12%, FDR nod = 2.3e-11%

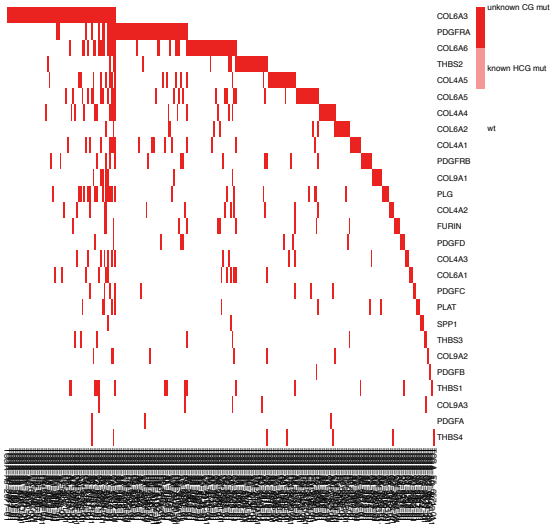

**Tie2 Signaling**  
 FDR = 1.9e-12%, FDR nod = 0.074%

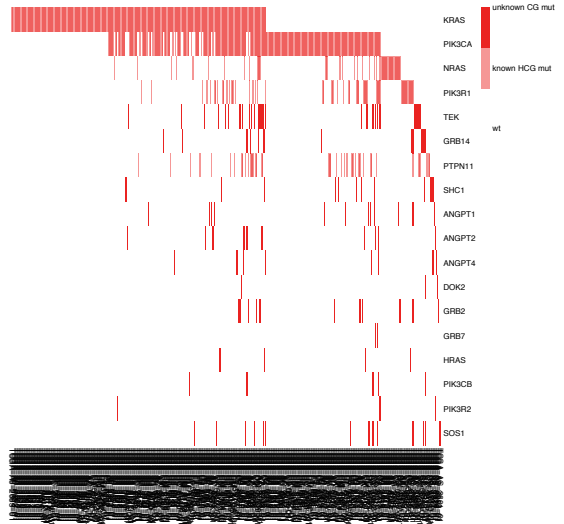

**VEGF Signaling Pathway**  
 FDR = 1.9e-12%, FDR nod = 0.053%

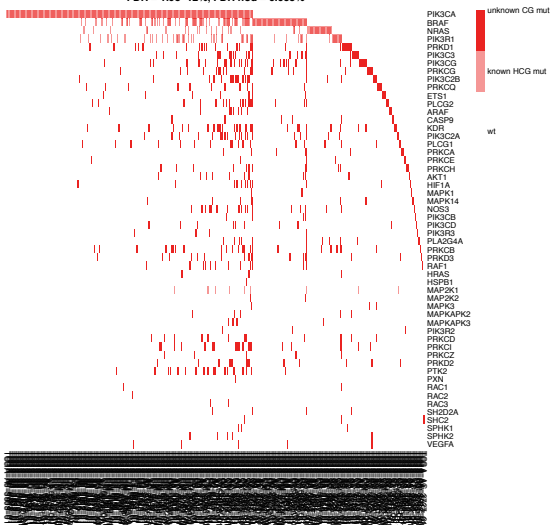

**VEGFR3 Signaling In Lymphatic Endothelium**  
 FDR = 1.9e-12%, FDR nod = 1.2%

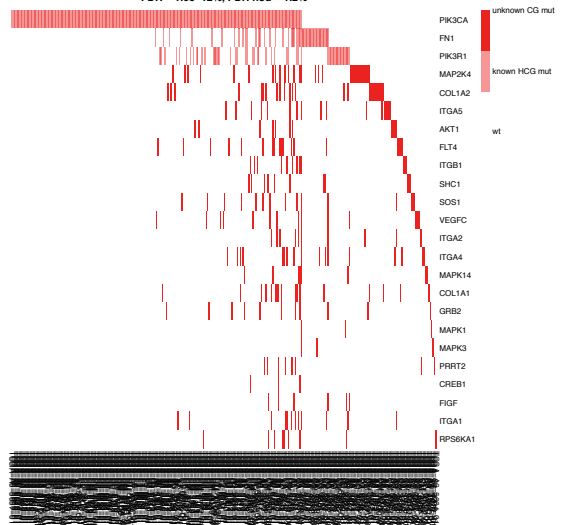

**Apoptotic Cleavage Of Cell Adhesion Proteins**  
FDR = 1.9e-12%, FDR nod = 2.3e-11%

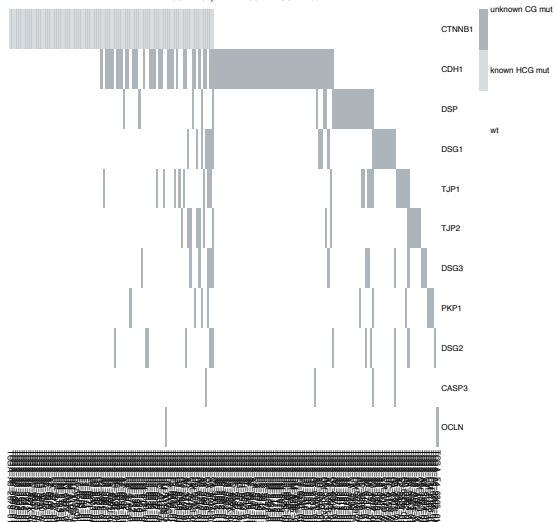

**FAS Pathway And Stress Induction Of HSP Regulation**  
FDR = 4e-06%, FDR nod = 5.5e-06%

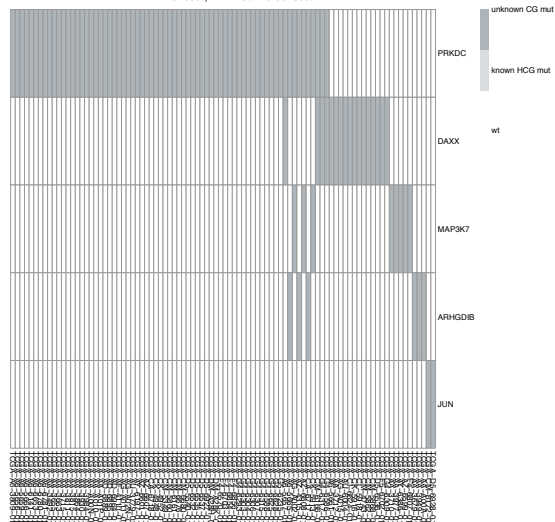

**FAS Signaling Pathway**  
FDR = 2.4e-12%, FDR nod = 3.7e-06%

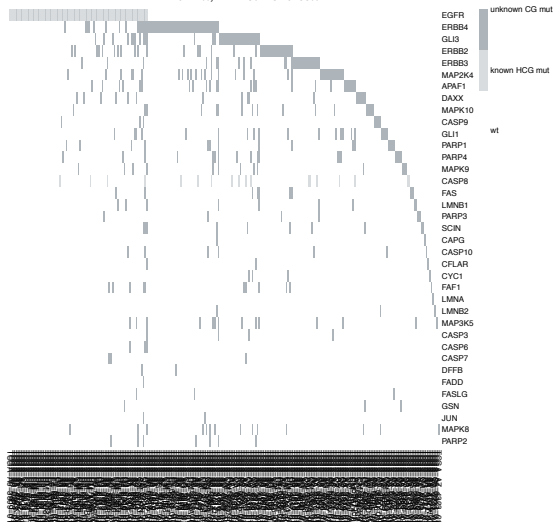

**G2/M DNA Damage Checkpoint**  
Processing Of DNA Double Strand Break Ends  
FDR = 1.9e-12%, FDR nod = 4.6%

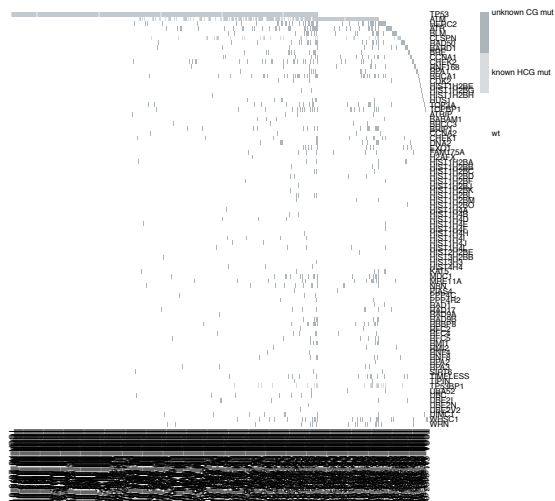

**Homologous DNA Pairing And Strand Exchange**  
Resolution Of D Loop Structures Through Synthesis Dependent Strand Annealing (SDSA)  
FDR = 1.9e-12%, FDR nod = 0.014%

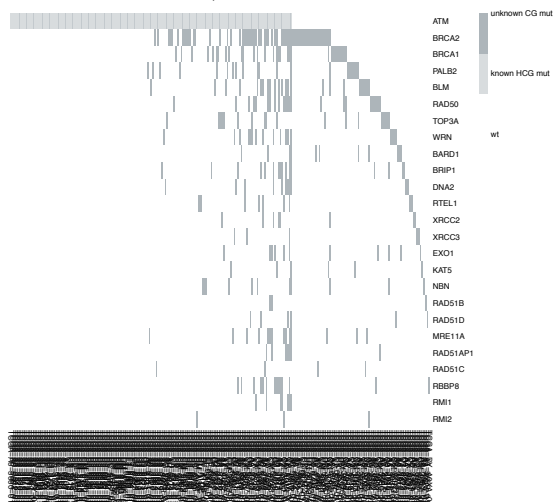

**Presynaptic Phase Of Homologous DNA Pairing And Strand Exchange**  
FDR = 2e-12%, FDR nod = 0.0018%

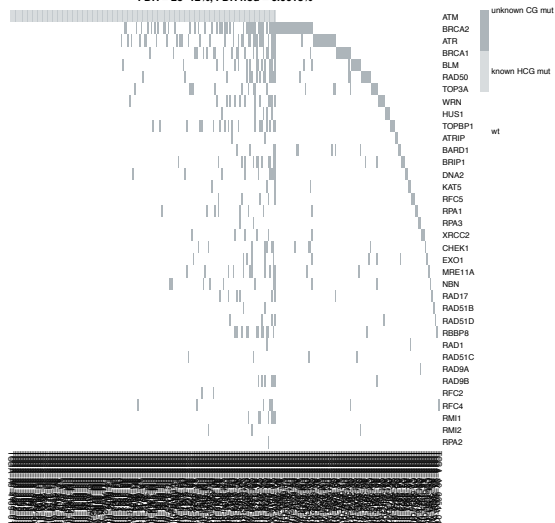

**TP53 Regulates Transcription Of Death Receptors And Ligands**  
 FDR = 1.9e-12%, FDR nod = 3.6%

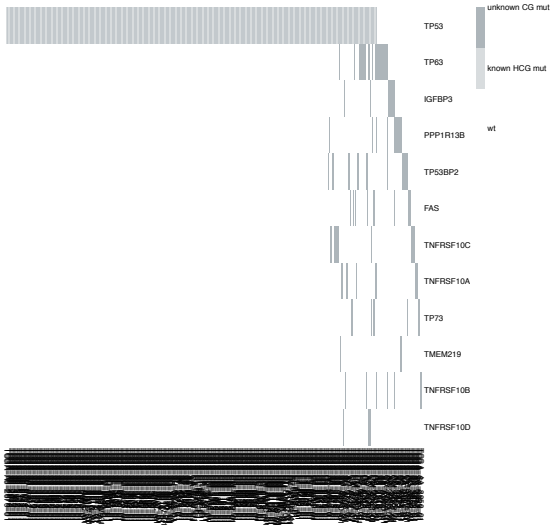

**TRIF Mediated Programmed Cell Death**  
 FDR = 0.052%, FDR nod = 3.8%

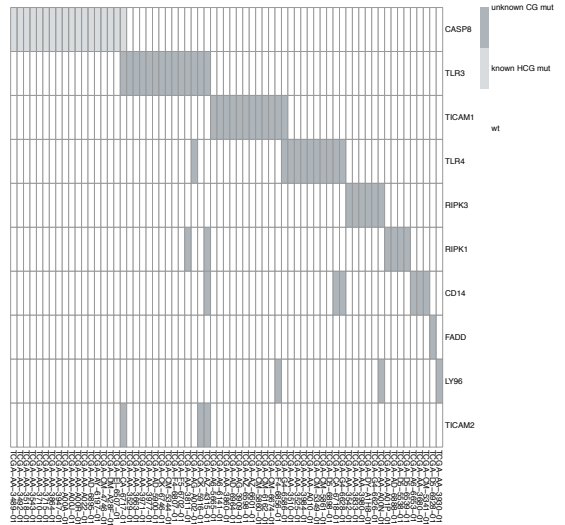

**Activated Point Mutants Of FGFR2**  
 Phospholipase C Mediated Cascade; FGFR2  
 FDR = 0.22%, FDR nod = 0.22%

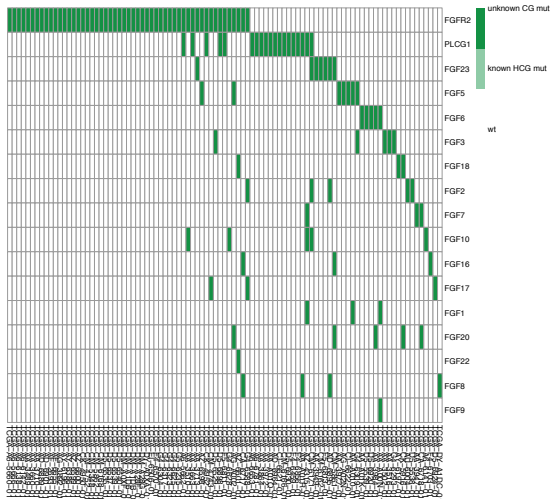

**Constitutive Signaling By EGFR/III**  
 FDR = 1.9e-12%, FDR nod = 0.00014%

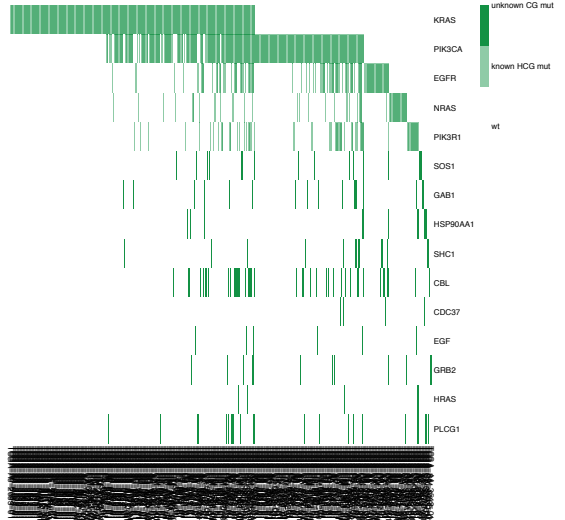

**Constitutive Signaling By Ligand Responsive EGFR Cancer Variants**  
 FDR = 1.9e-12%, FDR nod = 0.0019%

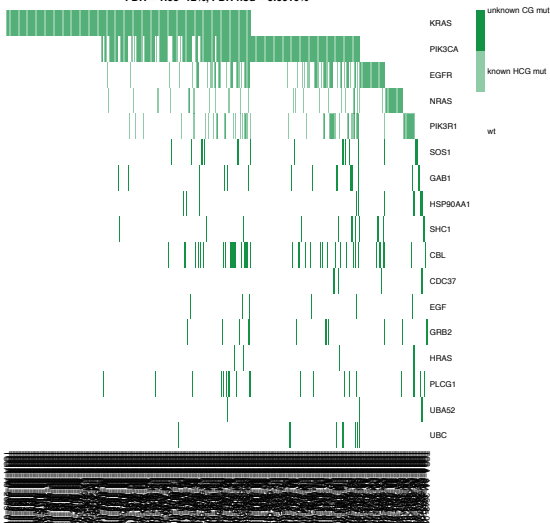

**Cyclin A:Cdk2 Associated Events At S Phase Entry**  
 FDR = 1.9e-12%, FDR nod = 2.3e-11%

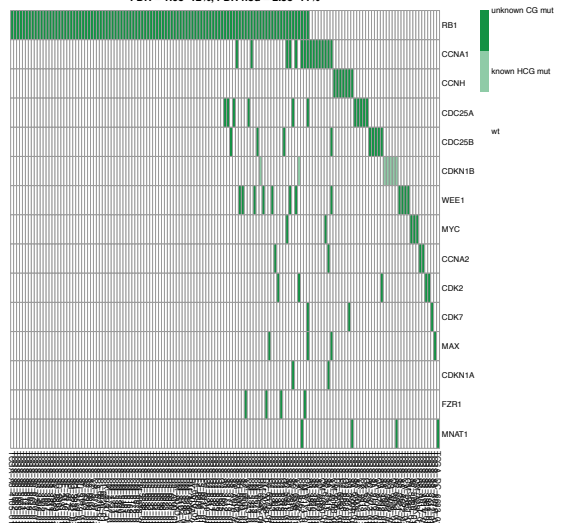

**Energy Dependent Regulation Of MTOR By LKB1 AMPK**  
FDR = 4.4%, FDR nod = 3.2%

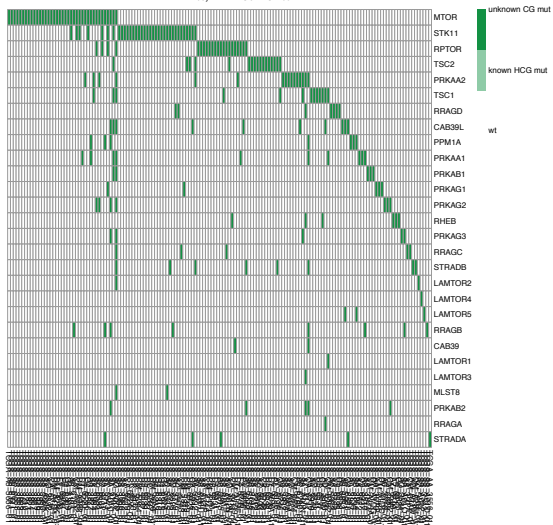

**ErbB Receptor Signaling Network**  
FDR = 2e-12%, FDR nod = 2.3e-11%

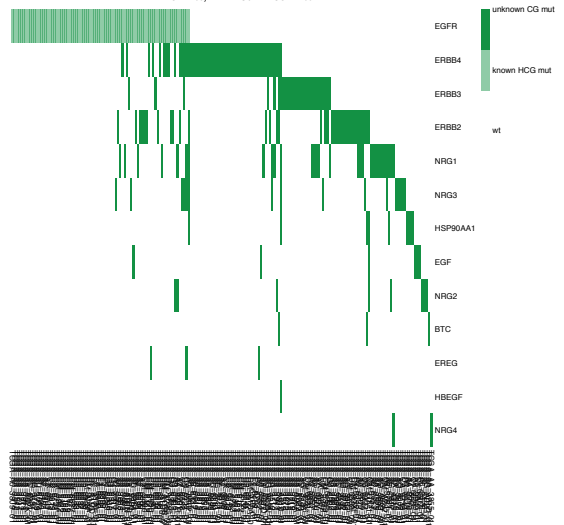

**ERBB2 Activates PTK6 Signaling By ERBB4**  
FDR = 1.9e-12%, FDR nod = 2.3e-11%

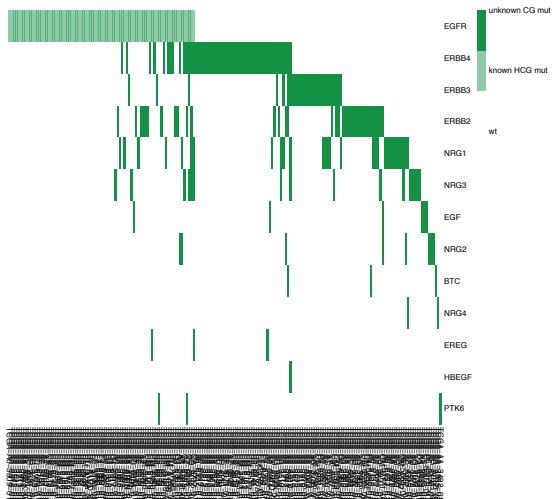

**ERBB2 Regulates Cell Motility**  
FDR = 1.9e-12%, FDR nod = 5.5e-11%

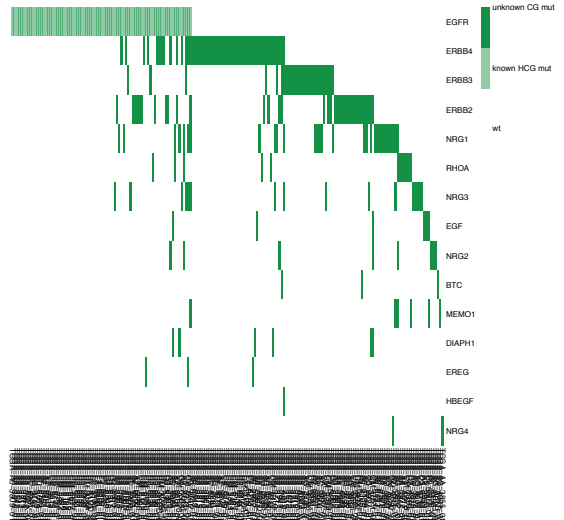

**ErbB2/ErbB3 Signaling Events**  
FDR = 1.9e-12%, FDR nod = 1.1e-09%

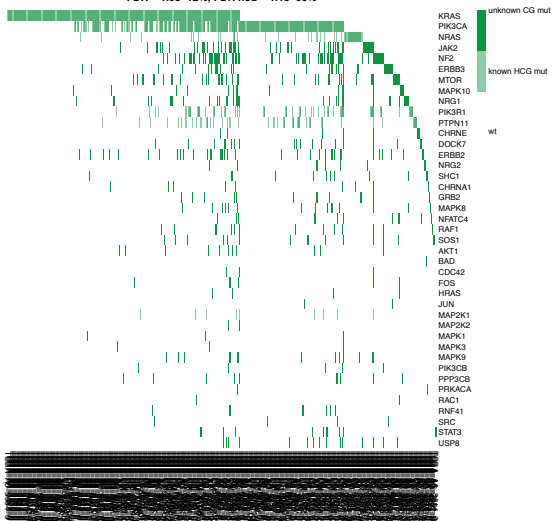

**ErbB4 Signaling Events**  
FDR = 1.9e-12%, FDR nod = 3.6e-06%

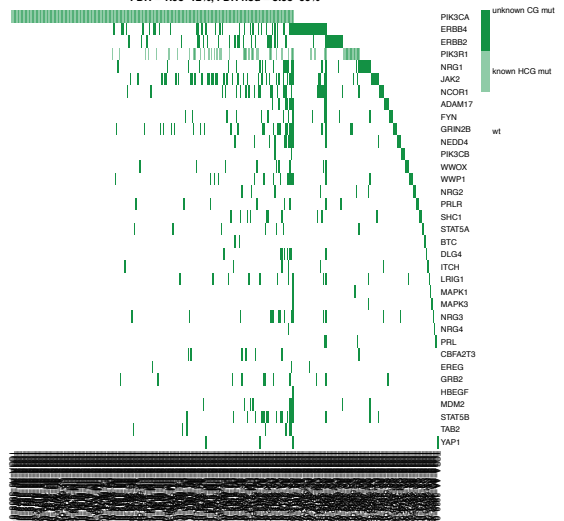

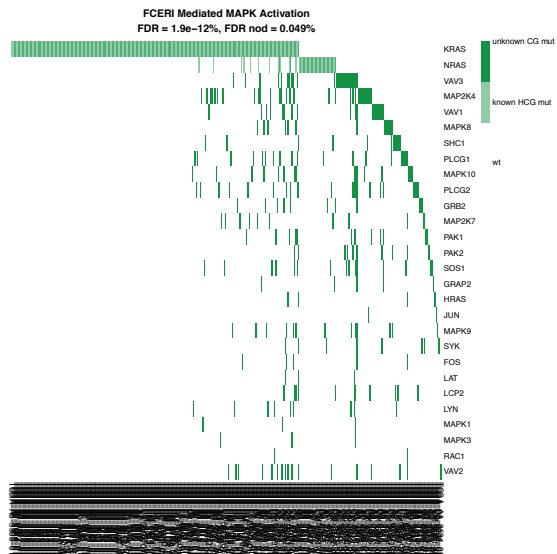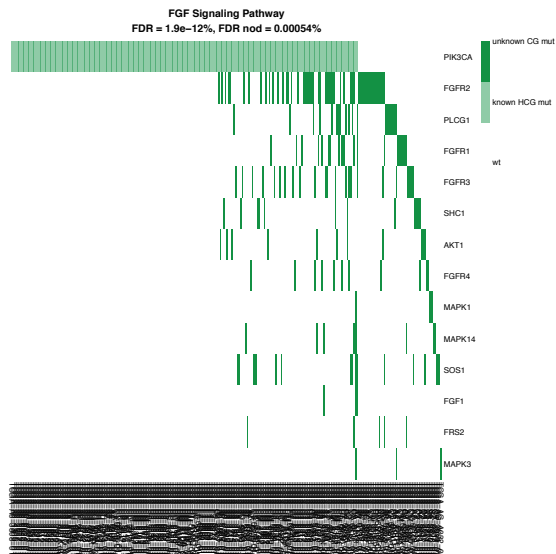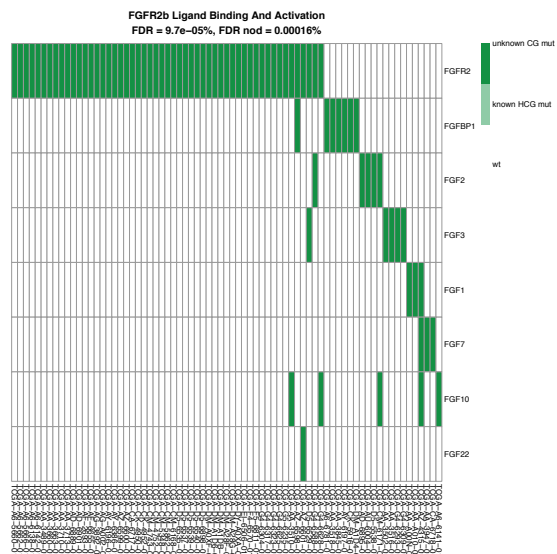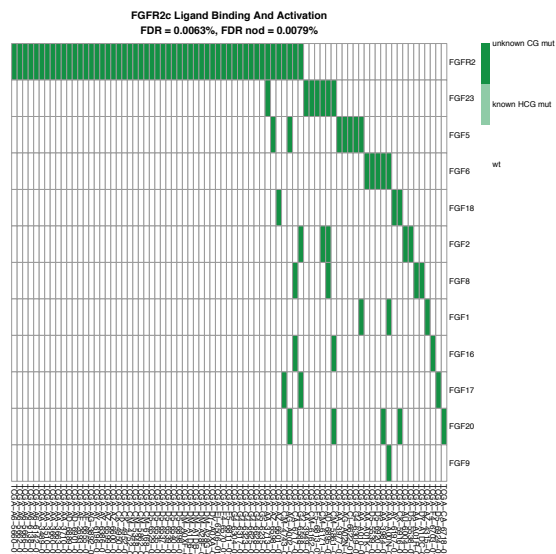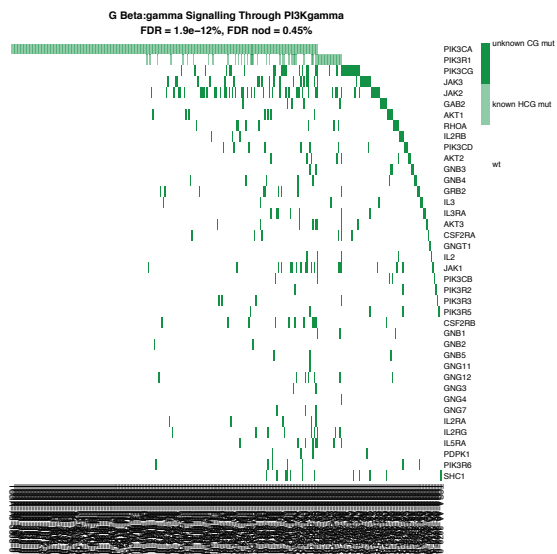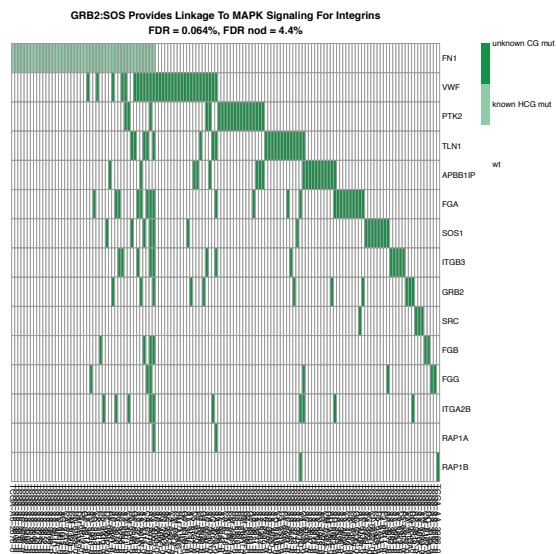

**rowth Hormone Signaling Pathway(JAK2 STATS) ( Growth Hormone Signaling(JAK2 STATS) )**  
**FDR = 1.9e-12%, FDR nod = 2e-05%**

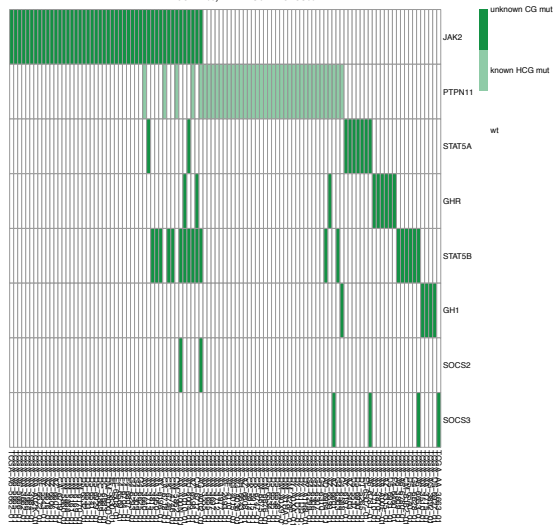

**thway (through Glutamate, G Alpha Q And PLC Beta) ( GPCR GroupI Metabotropic Glutamate Receptor Signaling I**  
**FDR = 1.9e-12%, FDR nod = 0.00018%**

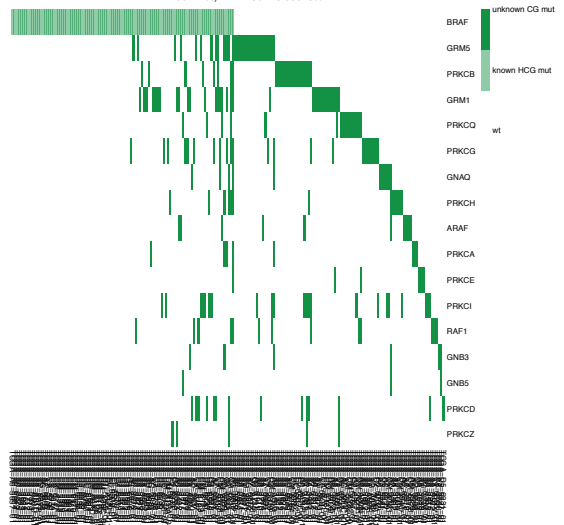

**IL2 Signaling Events Mediated By PI3K**  
**FDR = 2e-12%, FDR nod = 4.8%**

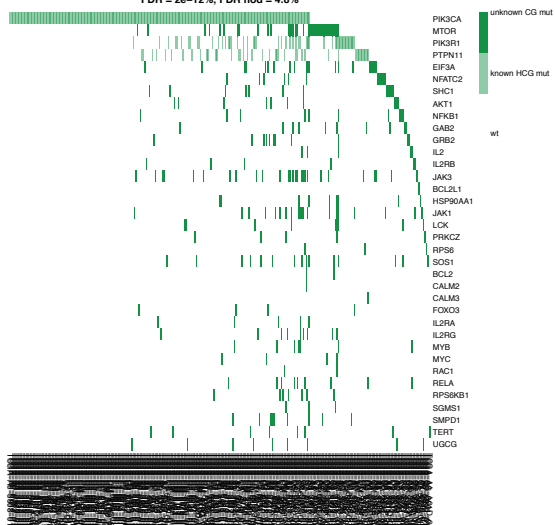

**JAK/STAT Signaling Pathway**  
**FDR = 0.06%, FDR nod = 0.048%**

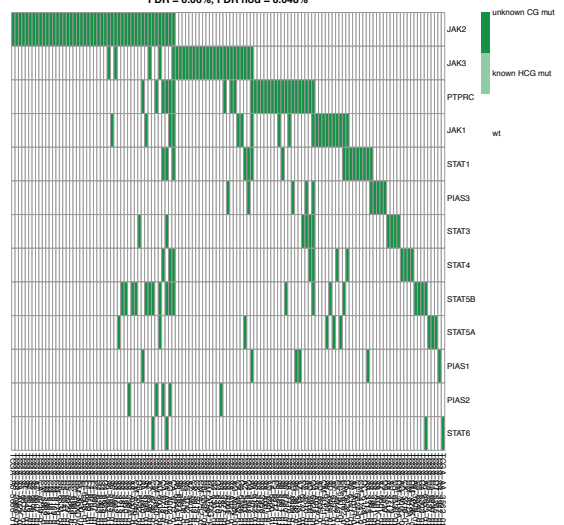

**JNK Cascade ( EGF Signaling Pathway Diagram )**  
**JNK Cascade ( PDGF Signaling Pathway )**  
**FDR = 0.00054%, FDR nod = 0.0011%**

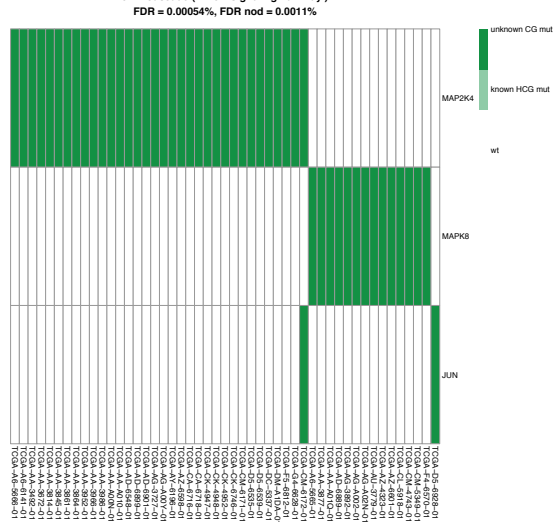

**MAP3K8 (TPL2) Dependent MAPK1/3 Activation**  
**FDR = 0.25%, FDR nod = 3.3%**

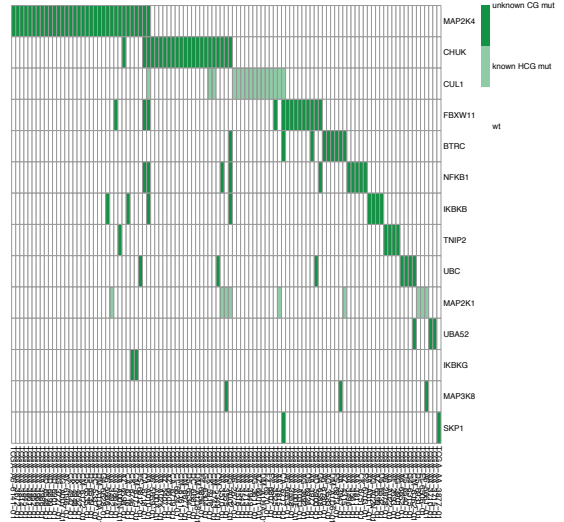

**MAPK1 (ERK2) Activation**  
FDR = 1.2e-10%, FDR nod = 0.0054%

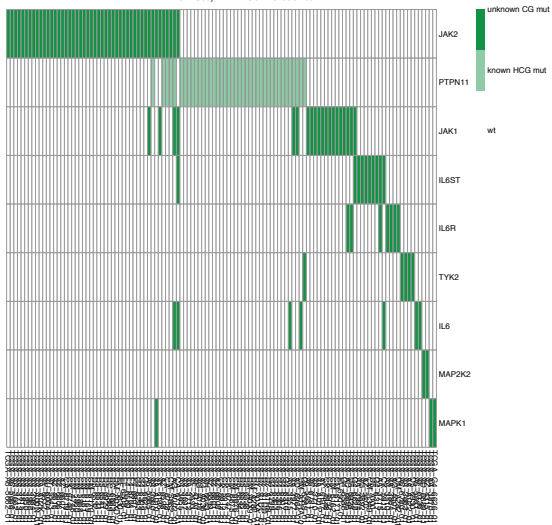

**MAPK3 (ERK1) Activation**  
FDR = 1.9e-12%, FDR nod = 3.6e-06%

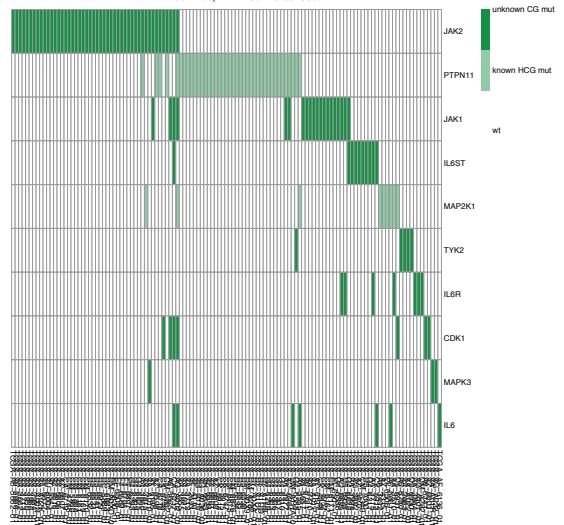

**MyD88 Dependent Cascade Initiated On Endosome**  
**TRAF6 Mediated Induction Of NFkB And MAP Kinases Upon TLR7/8 Or 9 Activation**  
FDR = 0.41%, FDR nod = 0.51%

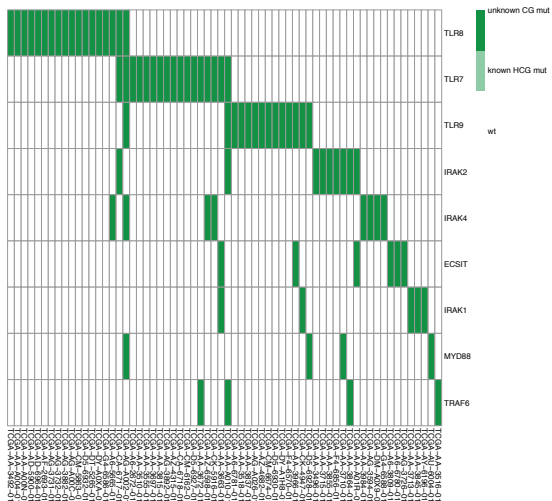

**NGF Signaling Pathway ( NGF Signaling Pathway )**  
FDR = 1.9e-12%, FDR nod = 0.23%

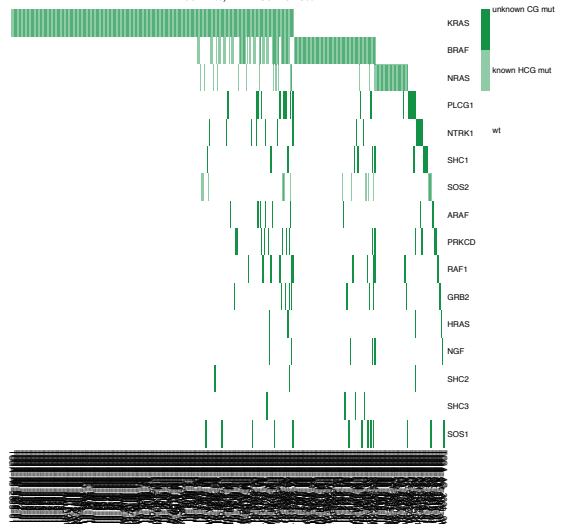

**Phosphorylation Of Proteins Involved In G1/S Transition By Active Cyclin E:Cdk2 Complexes**  
FDR = 1.9e-12%, FDR nod = 2.3e-11%

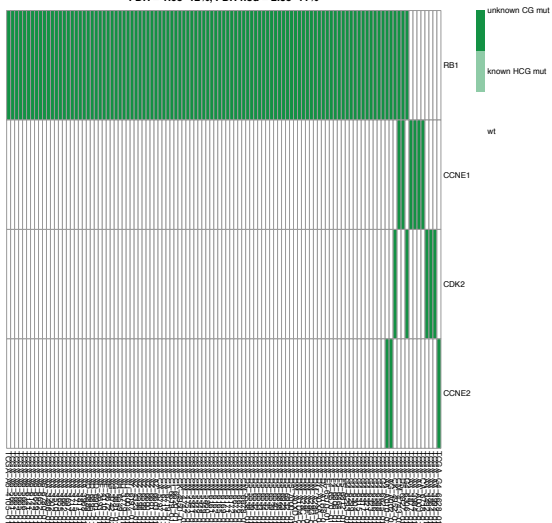

**PI3K Cascade**  
FDR = 1.9e-12%, FDR nod = 0.022%

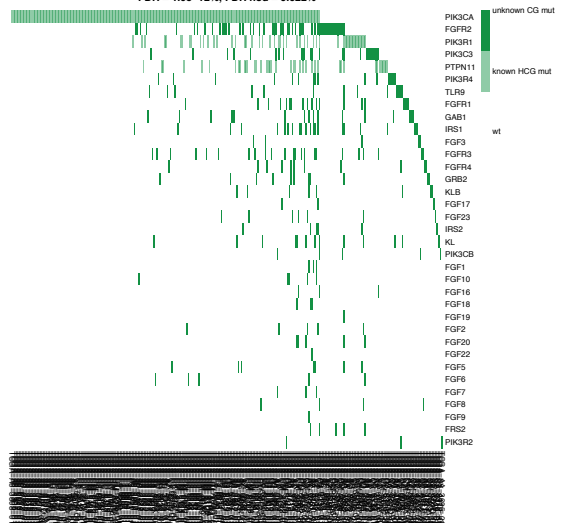

**PI3K Events In ERBB2 Signaling**  
 FDR = 1.9e-12%, FDR nod = 2.3e-11%

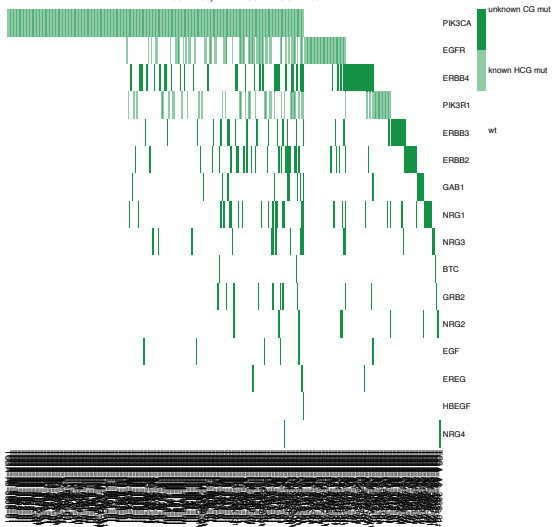

**PI3K Events In ERBB4 Signaling**  
 FDR = 1.9e-12%, FDR nod = 3.5e-06%

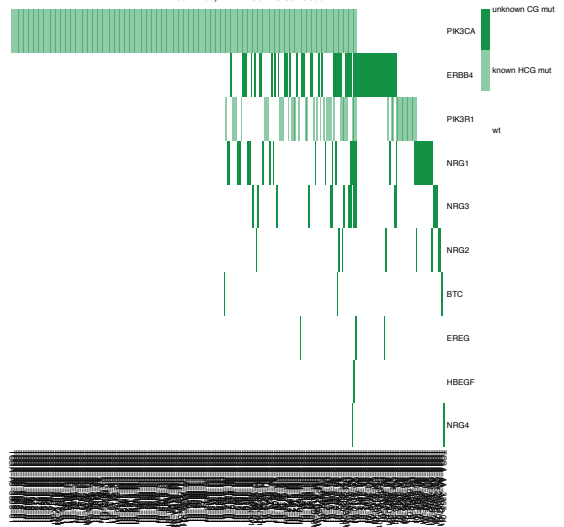

**Raf Activation Signaling (through Grb2 And Sos) ( B Cell Receptor Signaling )**  
**Activation Signaling (through Grb2 And Sos) ( CD4 T Cell Receptor Signaling (ERK Cascade) )**  
**Raf Activation Signaling (through Grb2 And Sos) ( CD4 T Cell Receptor Signaling )**  
**Activation Signaling (through Grb2 And Sos) ( JAK STAT Pathway And Regulation Pathway Diagram )**  
 FDR = 1.9e-12%, FDR nod = 2.5%

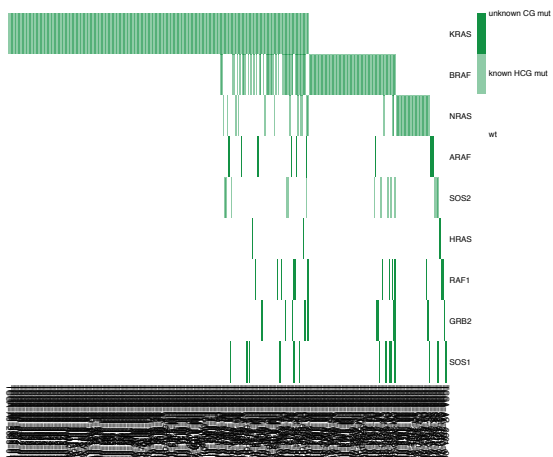

**f Activation Signaling (through RasGRP) ( CD4 T Cell Receptor Signaling (ERK Cascade) )**  
**Raf Activation Signaling (through RasGRP) ( CD4 T Cell Receptor Signaling )**  
 FDR = 1.9e-12%, FDR nod = 0.2%

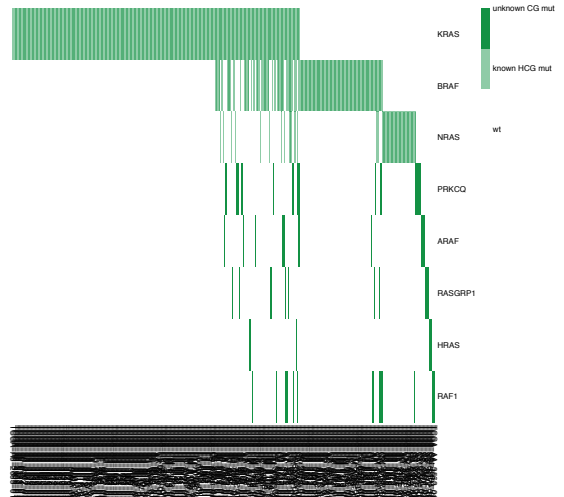

**Signaling By FGFR2 IIs TM**  
 FDR = 4.8%, FDR nod = 4.8%

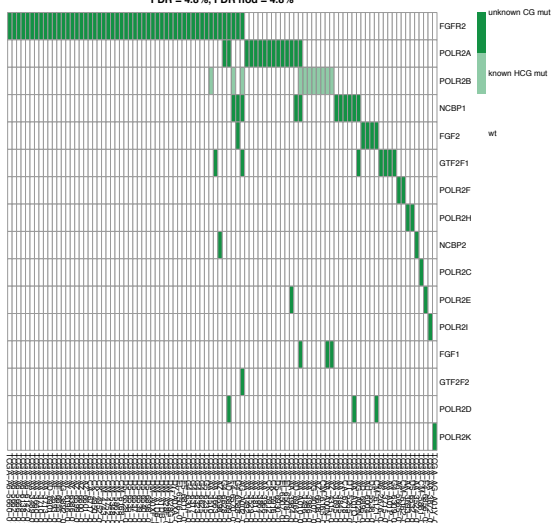

**Signaling By FGFR2 In Disease**  
 FDR = 1.9e-12%, FDR nod = 0.72%

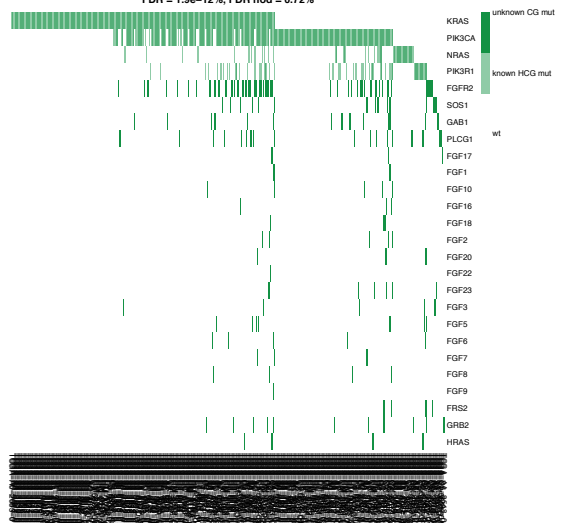



**BMP2 Signaling Pathway(through Smad) ( TGF Beta BMP Diagram(MolecularVariation) )**  
**FDR = 1.9e-12%, FDR nod = 0.095%**

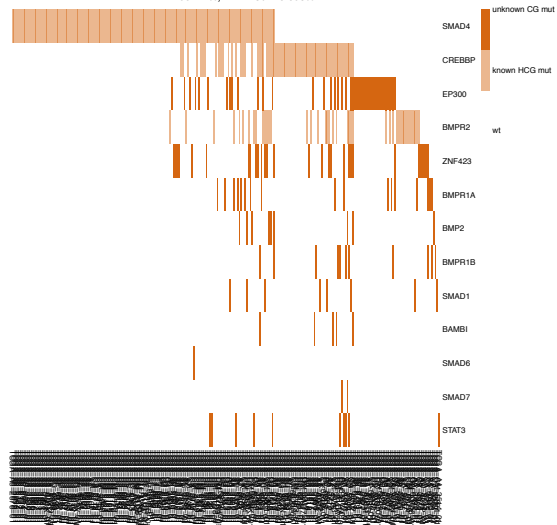

**Chemokine Receptors Bind Chemokines**  
**FDR = 4.8%, FDR nod = 3.9%**

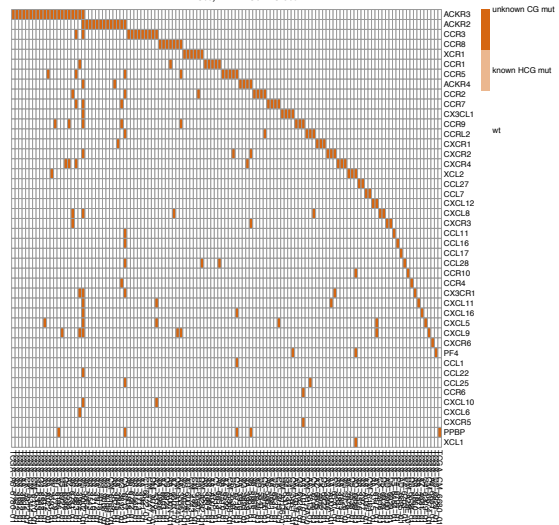

**Cytokine Receptor Degradation Signaling ( JAK STAT Pathway And Regulation Pathway Diagram )**  
**osphorylation Of Cytokine Receptor) in JAK STAT Pathway ( JAK STAT Pathway And Regulation Pathway Diagram )**  
**FDR = 2.3%, FDR nod = 1.3%**

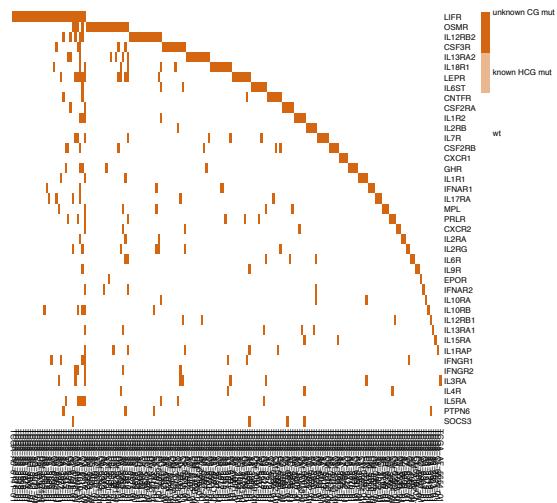

**Signaling Pathway(JAK1 TYK2 STAT1 STAT2) ( IFN Alpha Signaling(JAK1 TYK2 STAT1 STAT2 STAT3) )**  
**Signaling Pathway(JAK1 TYK2 STAT3) ( IFN Alpha Signaling(JAK1 TYK2 STAT1 STAT2 STAT3) )**  
**Signaling Pathway(JAK1 TYK2 STAT1) ( IFN Alpha Signaling(JAK1 TYK2 STAT1 STAT2 STAT3) )**  
**FDR = 2.5%, FDR nod = 2.5%**

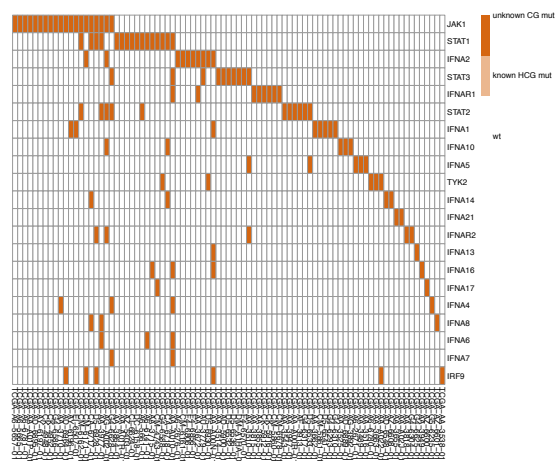

**IFN Gamma Pathway**  
**FDR = 1.9e-12%, FDR nod = 0.26%**

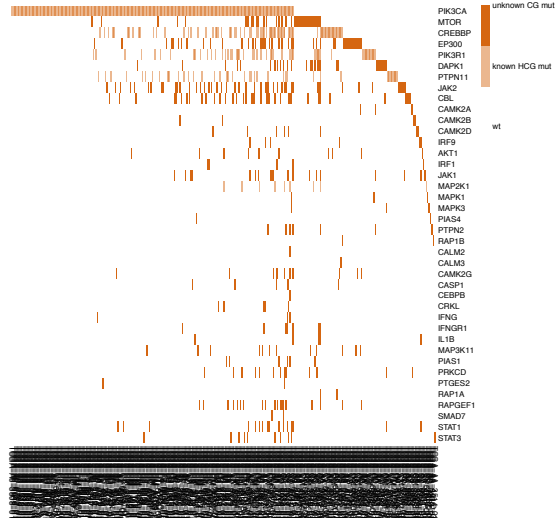

**IFN Gamma Signaling Pathway(JAK1 JAK2 STAT1) ( IFN Gamma Signaling(JAK1 JAK2 STAT1) )**  
**FDR = 2.5e-12%, FDR nod = 2.3e-11%**

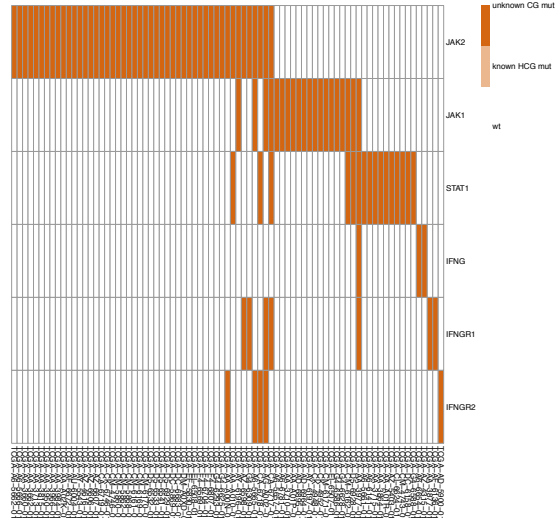

**IL 6 Type Cytokine Receptor Ligand Interactions**  
 FDR = 1.4e-09%, FDR nod = 1.2e-09%

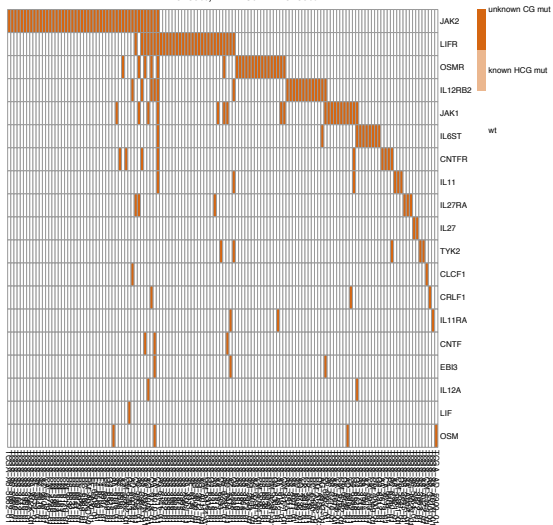

**IRF3 Mediated Activation Of Type 1 IFN**  
 FDR = 0.04%, FDR nod = 0.056%

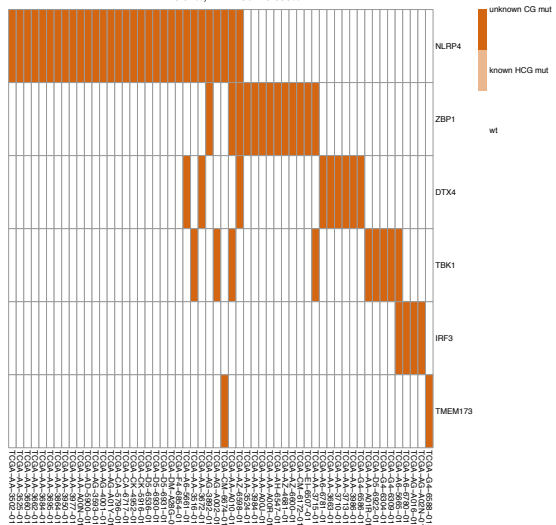

**IRF3 Mediated Induction Of Type I IFN**  
 FDR = 2.2e-07%, FDR nod = 2.2e-07%

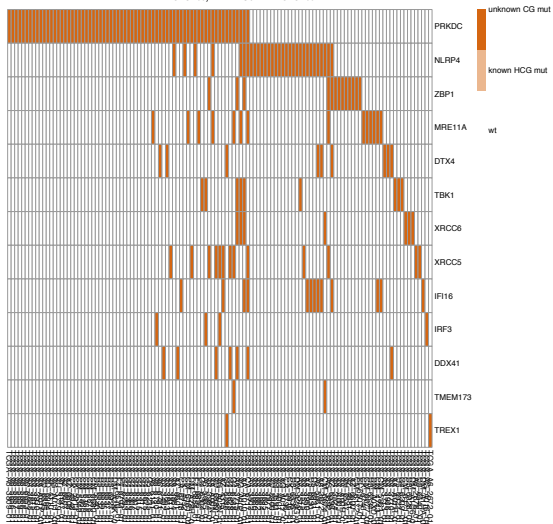

**JNK Cascade ( TGF Beta Signaling(through TAK1) )**  
 FDR = 0.38%, FDR nod = 0.45%

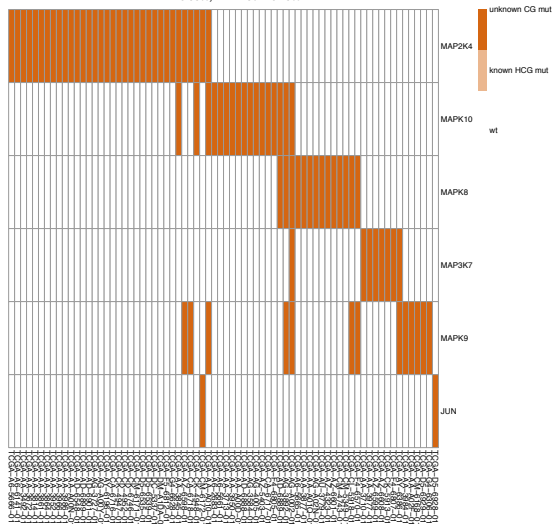

**LRR FLII Interacting Protein 1 (LRRFIP1) Activates Type I IFN Production**  
 FDR = 1.9e-12%, FDR nod = 0.021%

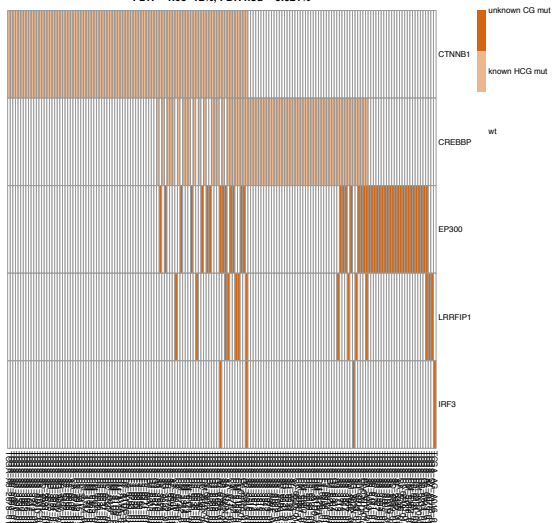

**Regulation Of IFNA Signaling**  
 FDR = 1.9e-07%, FDR nod = 0.54%

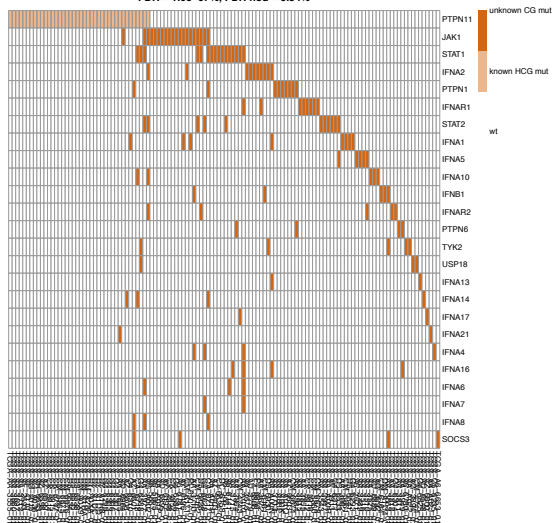

**Regulation Of IFNG Signaling**  
 FDR = 1.5e-11%, FDR nod = 0.0025%

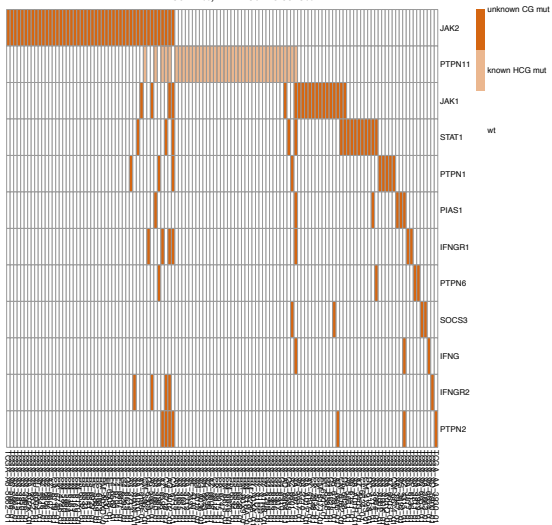

**RIG I/MDA5 Mediated Induction Of IFN Alpha/beta Pathways**  
 FDR = 0.8%, FDR nod = 0.78%

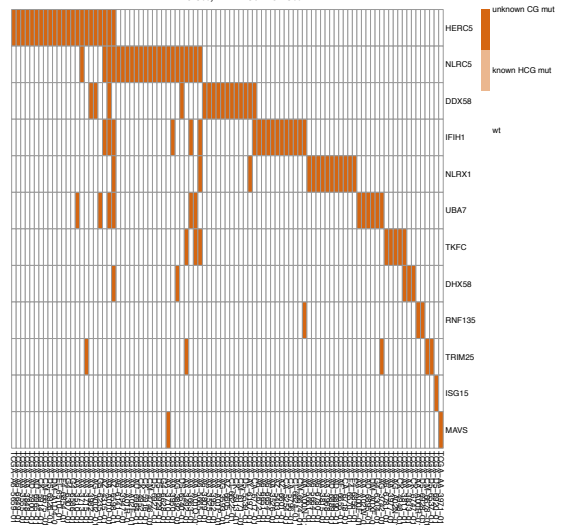

**SMAD2/3 MH2 Domain Mutants In Cancer**  
**SMAD2/3 Phosphorylation Motif Mutants In Cancer**  
**TGFBR1 KD Mutants In Cancer**  
 FDR = 2.1e-12%, FDR nod = 1.9%

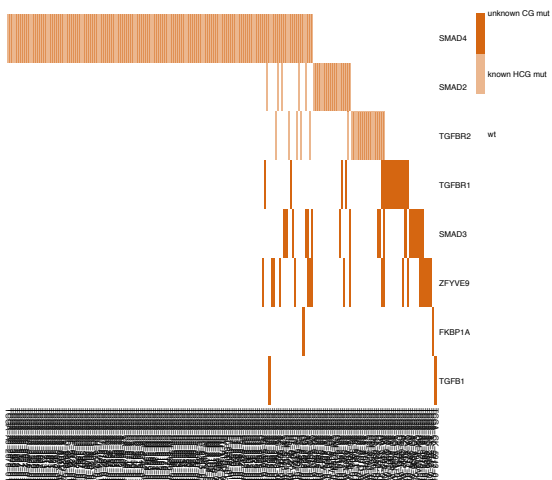

**SMAD2/SMAD3:SMAD4 Heterotrimer Regulates Transcription**  
 FDR = 1.9e-12%, FDR nod = 2.5%

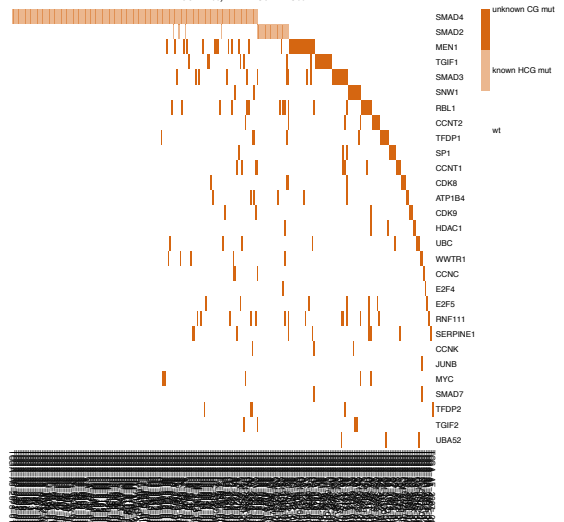

**TGF Beta Receptor Signaling Activates SMADs**  
 FDR = 1.9e-12%, FDR nod = 0.00021%

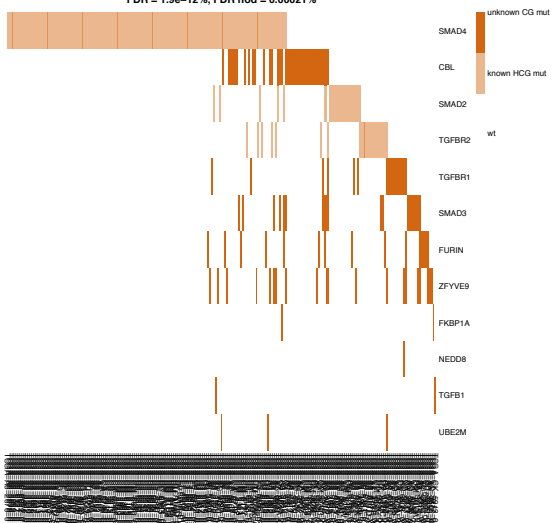

**ta Super Family Signaling Pathway(canonical) ( TGF Beta BMP Diagram(MolecularVariation) )**  
 FDR = 1.9e-12%, FDR nod = 0.31%

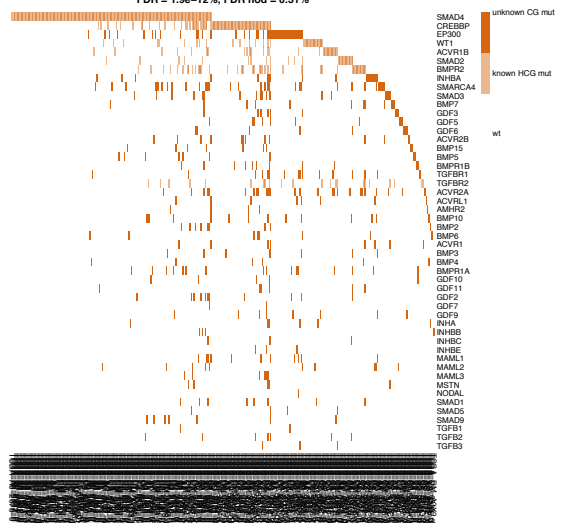

# GBM

Signaling By PDGF  
FDR = 0.0055%, FDR nod = 0.22%

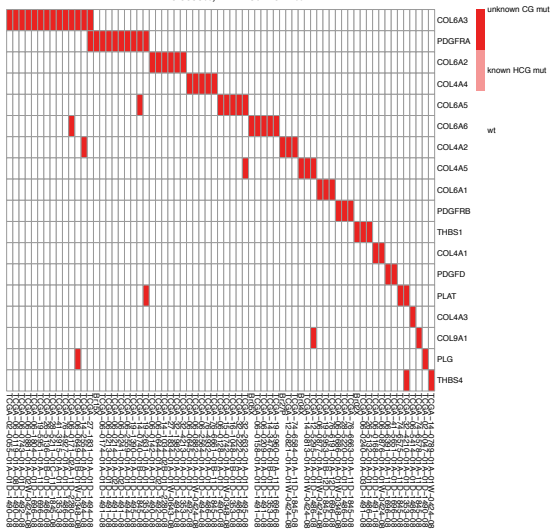

GRB2:SOS Provides Linkage To MAPK Signaling For Integrins  
FDR = 3.7%, FDR nod = 3.9%

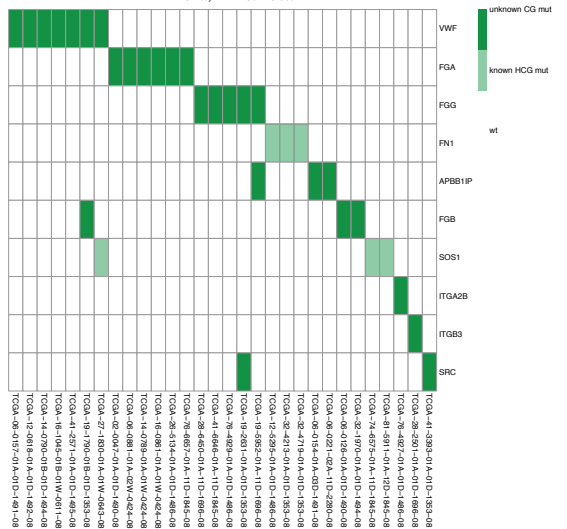

P130Cas Linkage To MAPK Signaling For Integrins  
FDR = 1.9%, FDR nod = 3.9%

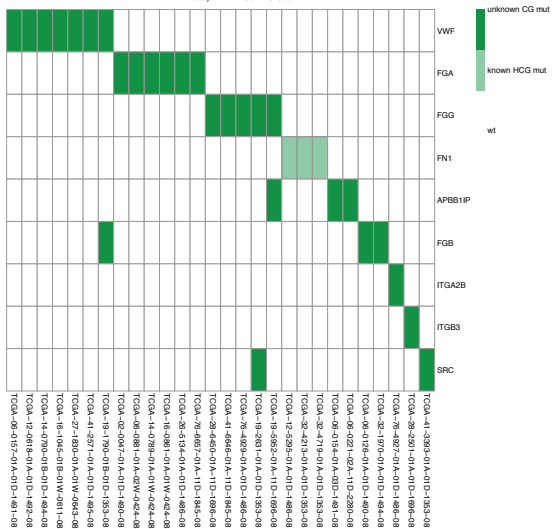

**HSNC**





Signaling By PDGF  
FDR = 0.65%, FDR nod = 3.1%

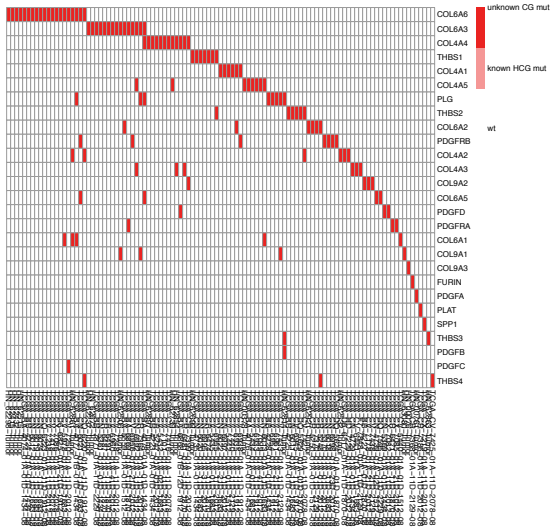

G2/M DNA Damage Checkpoint  
Processing Of DNA Double Strand Break Ends  
FDR = 1.9e-12%, FDR nod = 0.12%

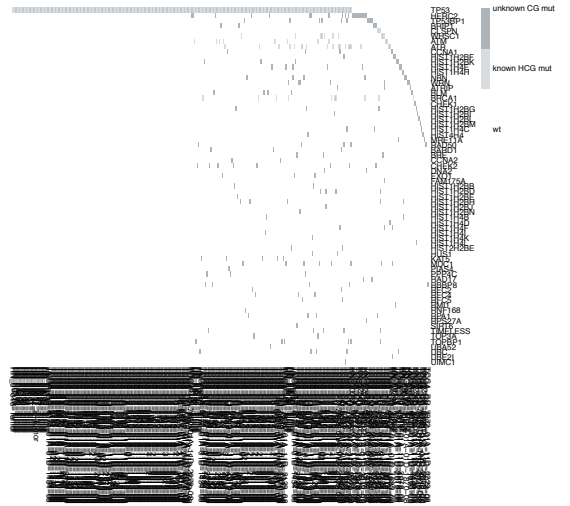

and ATM Mediated Phosphorylation Of Repair And Signaling Proteins At DNA Double Strand Breaks  
FDR = 1.9e-12%, FDR nod = 0.028%

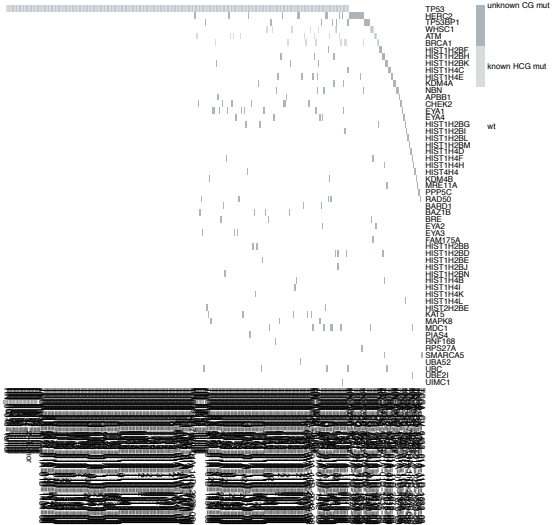

**KIRC**





**G2/M DNA Damage Checkpoint  
Processing Of DNA Double Strand Break Ends**  
FDR = 0.97%, FDR nod = 2.1%

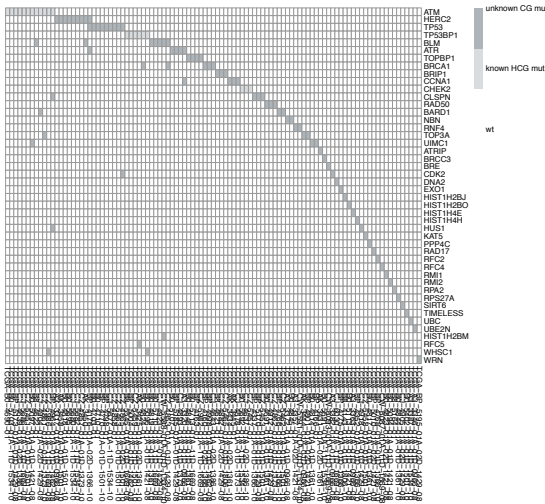

**PI3K Events In ERBB4 Signaling**  
FDR = 4.8%, FDR nod = 3%

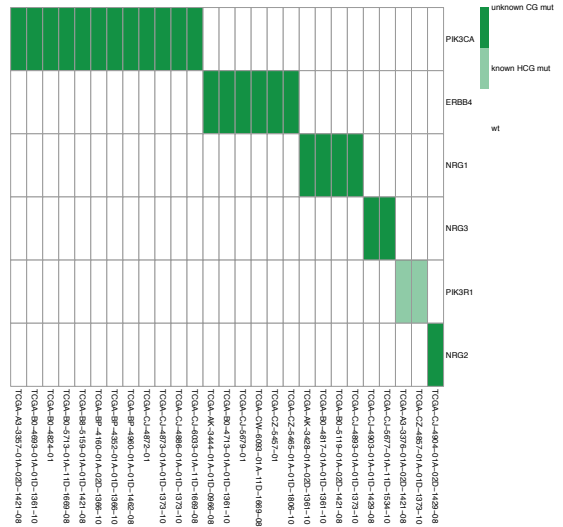

**Transcription Of Additional Cell Cycle Genes Whose Exact Role In The P53 Pathway Remain Uncertain**  
FDR = 0.67%, FDR nod = 0.97%

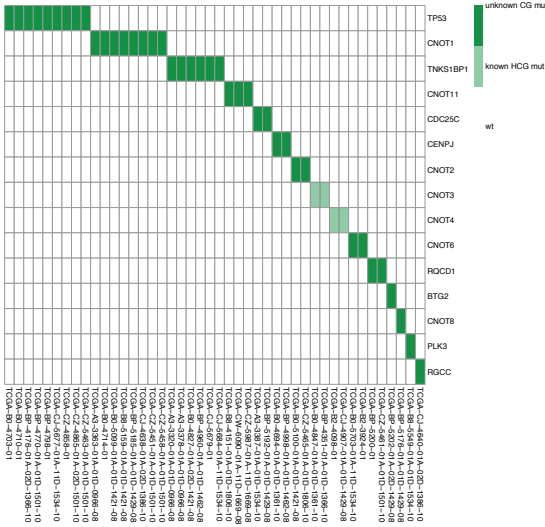

**TP53 Regulates Transcription Of Genes Involved In G2 Cell Cycle Arrest**  
FDR = 1%, FDR nod = 2.1%

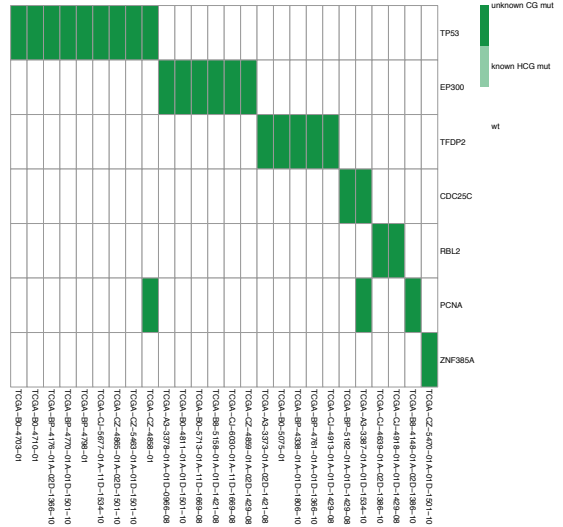

**Regulation Of IFNA Signaling**  
FDR = 1.1%, FDR nod = 2.1%

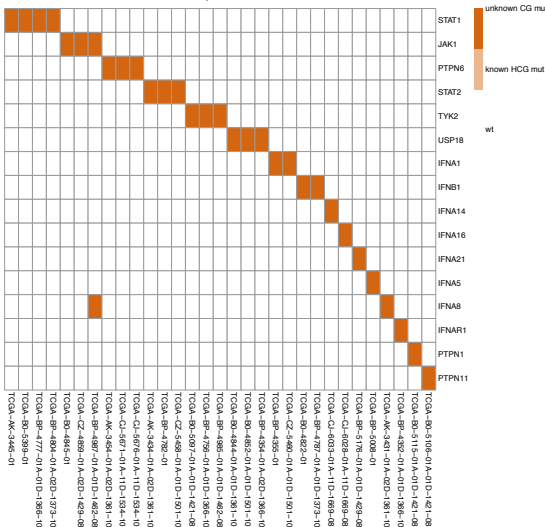

# LUAD

Activation Of Matrix Metalloproteinases  
FDR = 0.11%, FDR nod = 0.93%

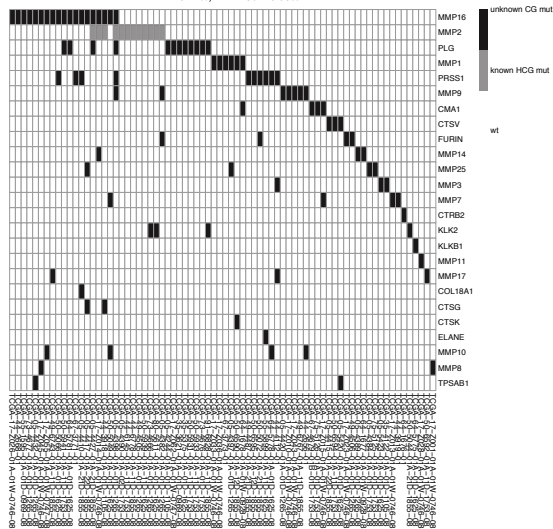

Collagen Degradation  
FDR = 0.019%, FDR nod = 0.019%

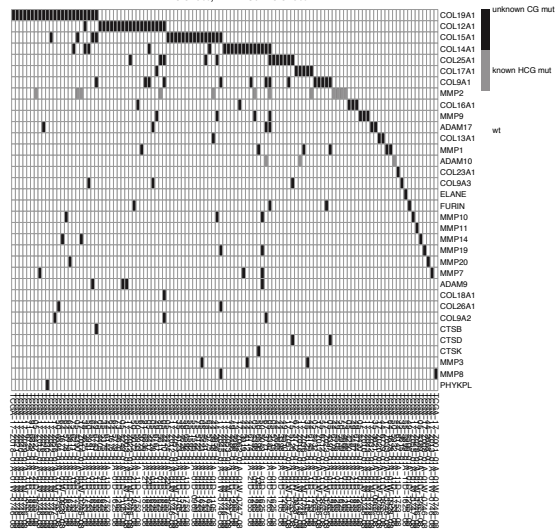

Ephrin B Reverse Signaling  
FDR = 2.7%, FDR nod = 0.32%

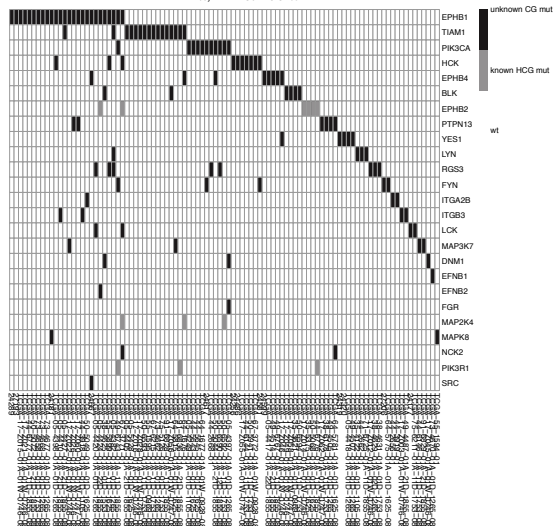

APC Truncation Mutants Have Impaired AXIN Binding  
AXIN Missense Mutants Destabilize The Destruction Complex  
Beta Catenin Phosphorylation Cascade  
Misspliced GSK3beta Mutants Stabilize Beta Catenin  
S33 Mutants Of Beta Catenin Aren't Phosphorylated  
S37 Mutants Of Beta Catenin Aren't Phosphorylated  
S45 Mutants Of Beta Catenin Aren't Phosphorylated  
T41 Mutants Of Beta Catenin Aren't Phosphorylated  
Truncations Of AMER1 Destabilize The Destruction Complex  
FDR = 1.1%, FDR nod = 3.4%

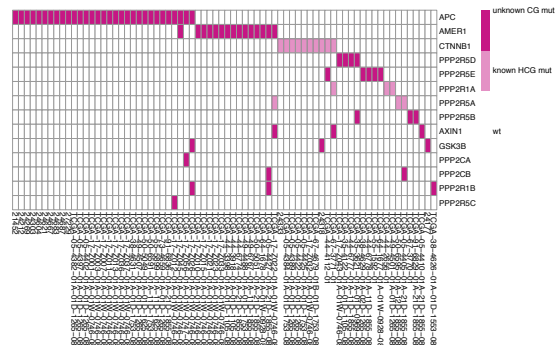

ignaling Pathway(JAK1 TYK2 STAT1 STAT2) (IFN Alpha Signaling(JAK1 TYK2 STAT1 STAT2 STAT3) )  
ignaling Pathway(JAK1 TYK2 STAT1 STAT3) (IFN Alpha Signaling(JAK1 TYK2 STAT1 STAT2 STAT3) )  
a Signaling Pathway(JAK1 TYK2 STAT1) (IFN Alpha Signaling(JAK1 TYK2 STAT1 STAT2 STAT3) )  
a Signaling Pathway(JAK1 TYK2 STAT3) (IFN Alpha Signaling(JAK1 TYK2 STAT1 STAT2 STAT3) )  
FDR = 0.0085%, FDR nod = 0.037%

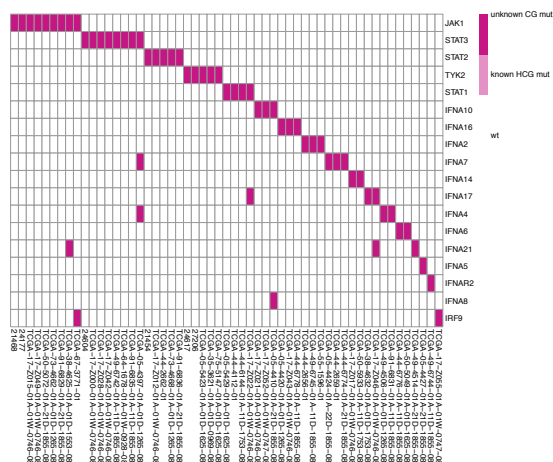

I Gamma Signaling Pathway(JAK1 JAK2 STAT1) (IFN Gamma Signaling(JAK1 JAK2 STAT1) )  
FDR = 0.88%, FDR nod = 1.8%

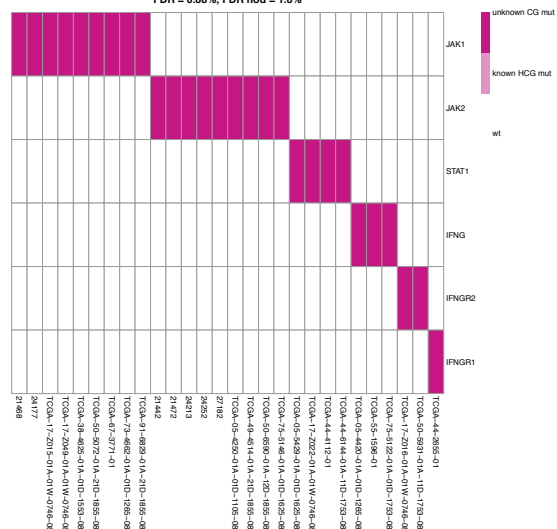

**IRF3 Mediated Induction Of Type I IFN**  
FDR = 0.02%, FDR nod = 0.074%

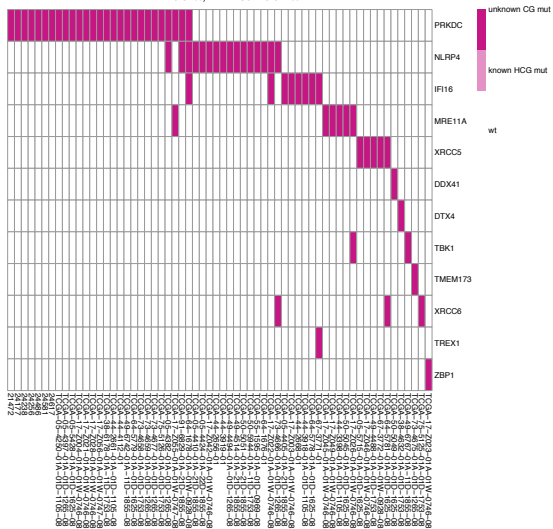

**Regulation Of IFNA Signaling**  
FDR = 0.0013%, FDR nod = 0.019%

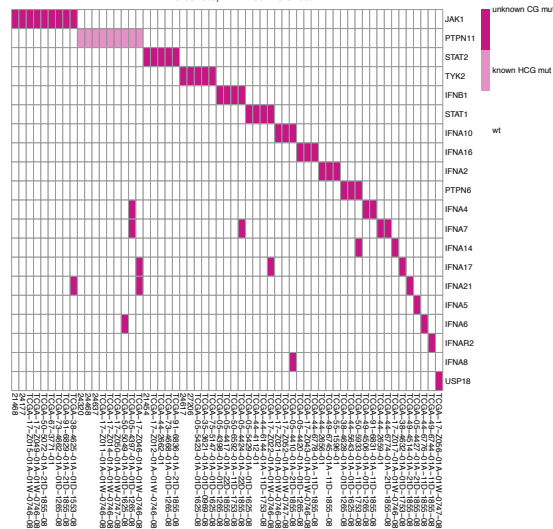

**DNA Damage/Telomere Stress Induced Senescence**  
FDR = 2e-12%, FDR nod = 0.0053%

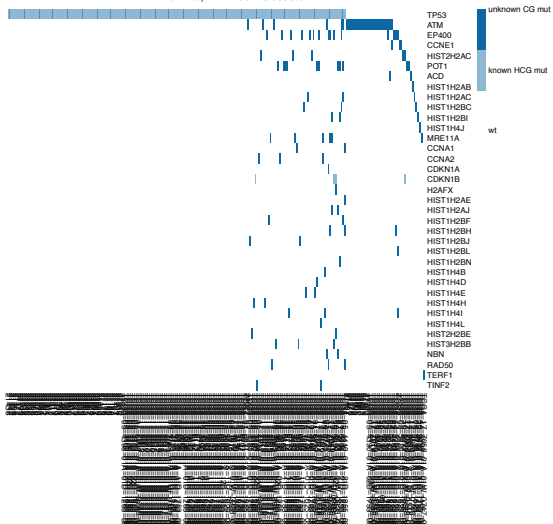

**Packaging Of Telomere Ends**  
FDR = 0.07%, FDR nod = 0.2%

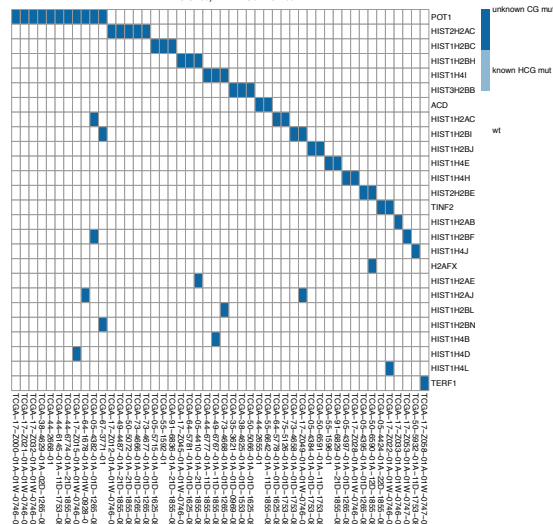

**APC Truncation Mutants Have Impaired AXIN Binding**  
AXIN Missense Mutants Destabilize The Destruction Complex  
Beta Catenin Phosphorylation Cascade  
Misspliced GSK3beta Mutants Stabilize Beta Catenin  
S33 Mutants Of Beta Catenin Aren't Phosphorylated  
S37 Mutants Of Beta Catenin Aren't Phosphorylated  
S45 Mutants Of Beta Catenin Aren't Phosphorylated  
T41 Mutants Of Beta Catenin Aren't Phosphorylated  
Truncations Of AMER1 Destabilize The Destruction Complex  
FDR = 1.1%, FDR nod = 3.4%

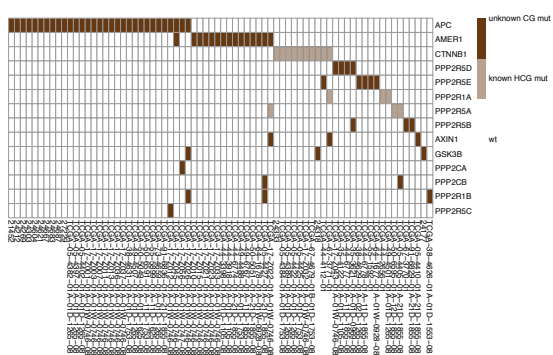

- AUF1 (hnRNP D0) Binds And Destabilizes MRNA
- Autodegradation Of The E3 Ubiquitin Ligase COP1
- CDK Mediated Phosphorylation And Removal Of Cdc6
- CDT1 Association With The CDC6:ORC:origin Complex
- Cross Presentation Of Soluble Exogenous Antigens (endosomes)
- Dectin 1 Mediated Noncanonical NF KB Signaling
- Degradation Of AXIN
- Degradation Of DVL
- Degradation Of GLI1 By The Proteasome
- Degradation Of GLI2 By The Proteasome
- G2/M Checkpoints
- GLI3 Is Processed To GLI3R By The Proteasome
- Hedgehog Ligand Biogenesis
- Hh Mutants That Don't Undergo Autocatalytic Processing Are Degraded By ERAD
- NIK >noncanonical NF KB Signaling
- Orc1 Removal From Chromatin
- Regulation Of Activated PAK 2p34 By Proteasome Mediated Degradation
- Regulation Of Ornithine Decarboxylase (ODC)
- SCF Beta TrCP Mediated Degradation Of Emi1
- The Role Of GTSE1 In G2/M Progression After G2 Checkpoint
- Ubiquitin Dependent Degradation Of Cyclin D1
- Ubiquitin Mediated Degradation Of Phosphorylated Cdc25A

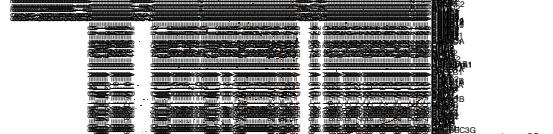



**DNA Damage/Telomere Stress Induced Senescence**  
 FDR = 2e-12%, FDR nod = 0.0053%

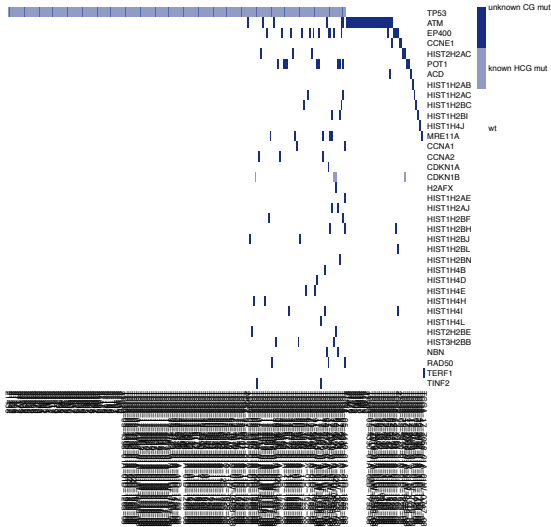

**E2F Transcription Factor Network**  
 FDR = 9.5e-07%, FDR nod = 1.1%

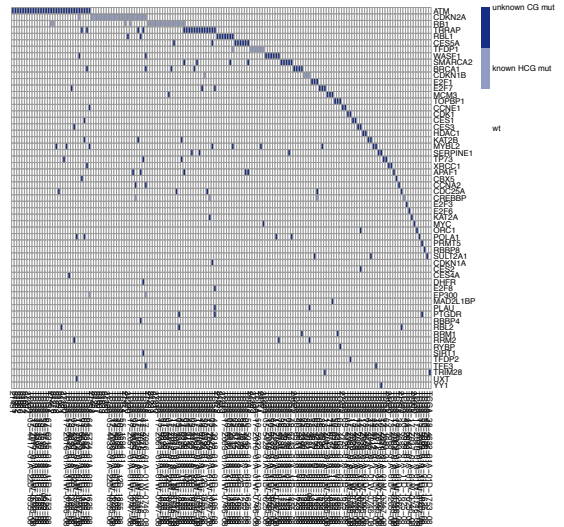

**HDR Through Homologous Recombination (HRR)**  
 FDR = 1.2%, FDR nod = 1.3%

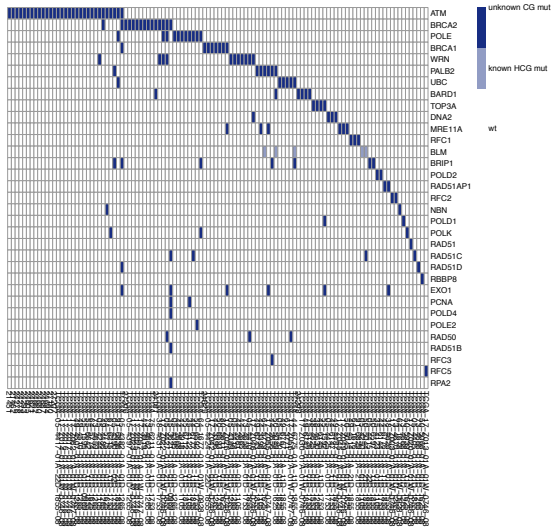

**HDR Through Single Strand Annealing (SSA)**  
 FDR = 0.14%, FDR nod = 0.41%

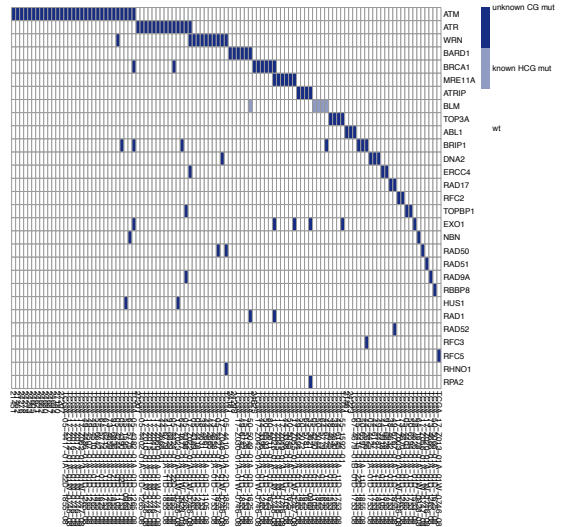

**Homologous DNA Pairing And Strand Exchange  
 resolution Of D Loop Structures Through Synthesis Dependent Strand Annealing (SDSA)**  
 FDR = 1.1%, FDR nod = 1.1%

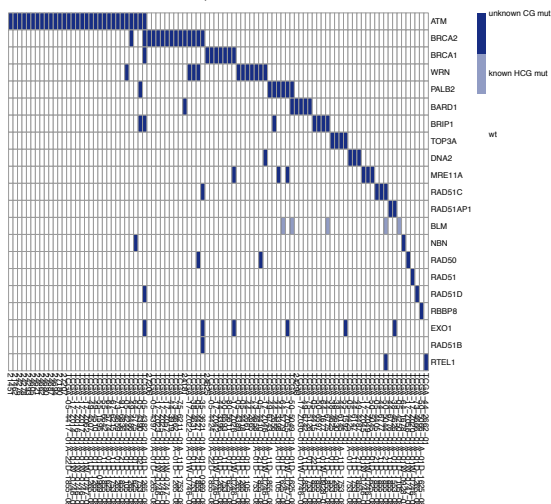

**Integrated Breast Cancer Pathway**  
 FDR = 2e-12%, FDR nod = 0.23%

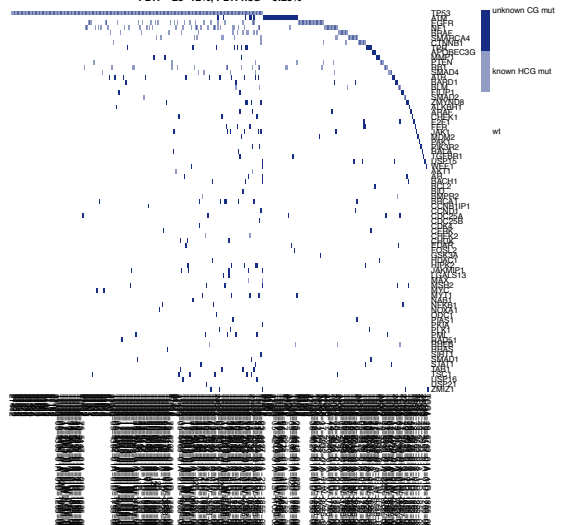

**Integrated Cancer Pathway**  
FDR = 2e-12%, FDR nod = 0.23%

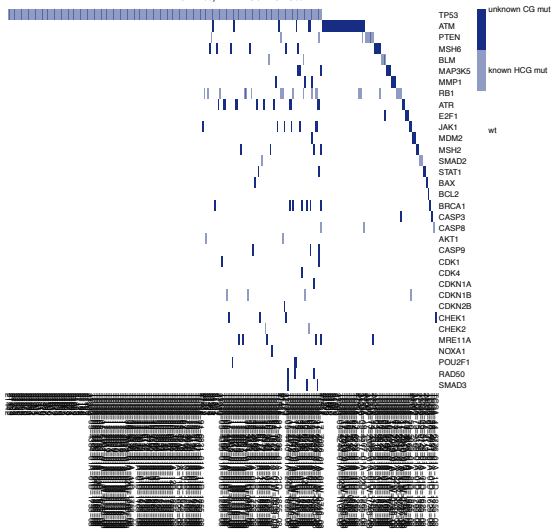

**Meiotic Recombination**  
FDR = 8.2e-06%, FDR nod = 2.7e-05%

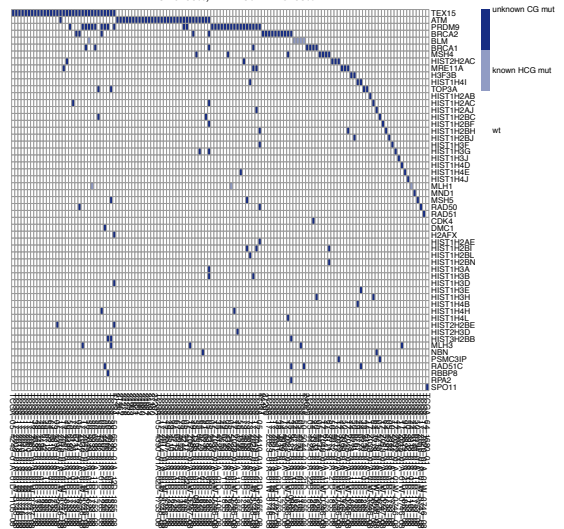

**Meiotic Synapsis**  
FDR = 5.3%, FDR nod = 1.4%

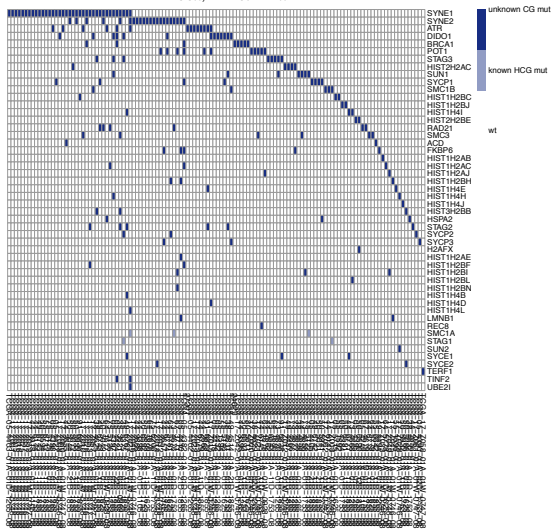

**Nonhomologous End Joining (NHEJ)**  
FDR = 0.35%, FDR nod = 0.23%

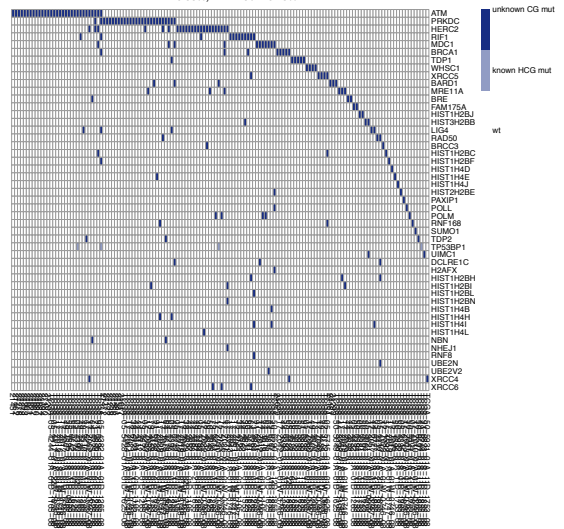

**P73 Transcription Factor Network**  
FDR = 0.11%, FDR nod = 1.2%

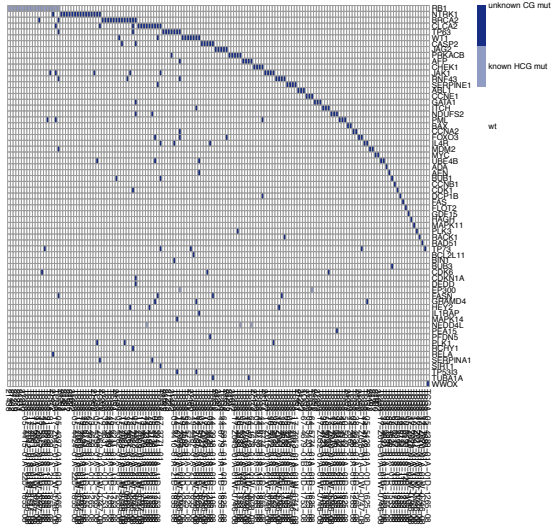

**Presynaptic Phase Of Homologous DNA Pairing And Strand Exchange**  
FDR = 0.13%, FDR nod = 0.23%

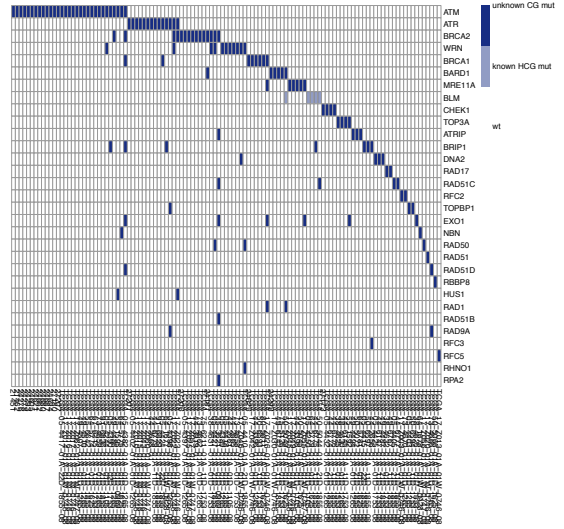

**Regulation Of TP53 Activity Through Phosphorylation**  
FDR = 2e-12%, FDR nod = 1.1%

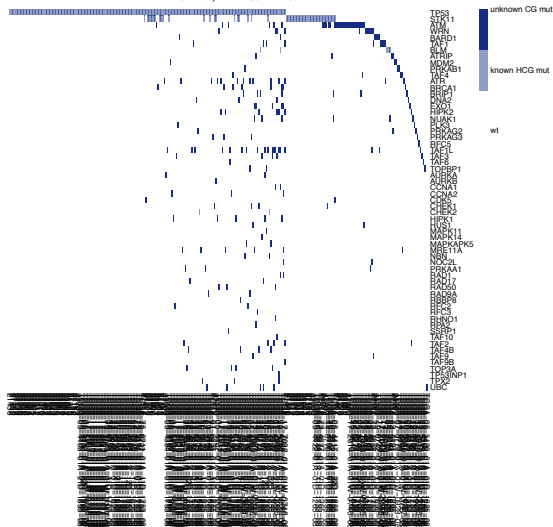

**PDGF Receptor Signaling Network**  
FDR = 0.02%, FDR nod = 0.081%

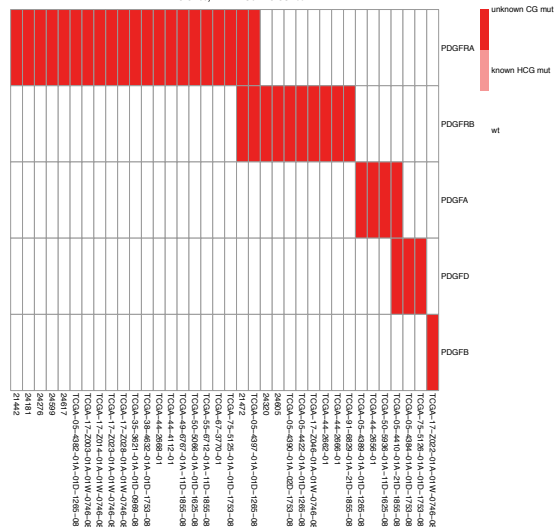

**PDGF Signaling Pathway (PDGF Signaling Pathway)**  
FDR = 2e-12%, FDR nod = 2.2%

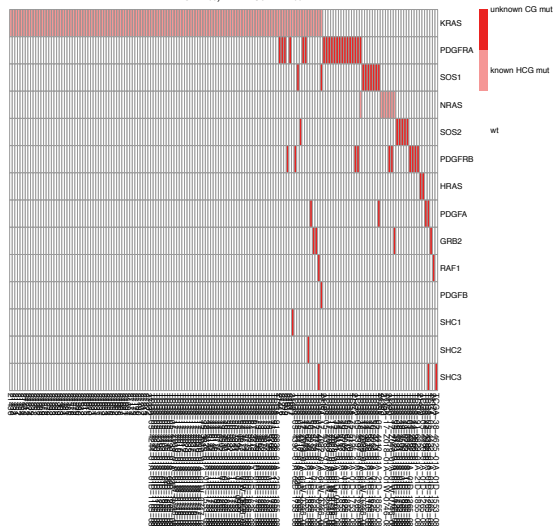

**PDGF Signaling Pathway (Mammal) (PDGF Signaling Pathway)**  
FDR = 2e-12%, FDR nod = 5%

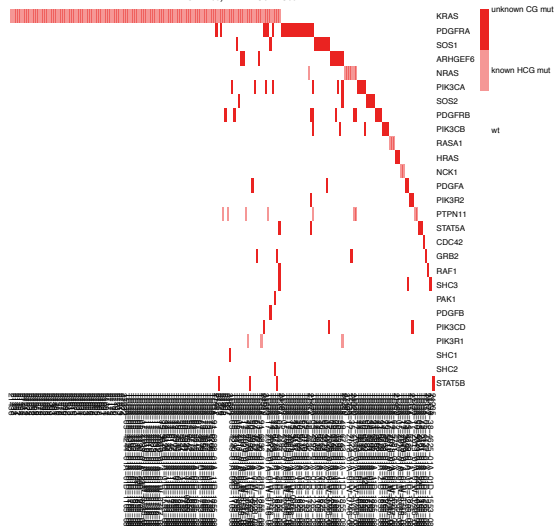

**PDGFR Alpha Signaling Pathway**  
FDR = 4%, FDR nod = 2.1%

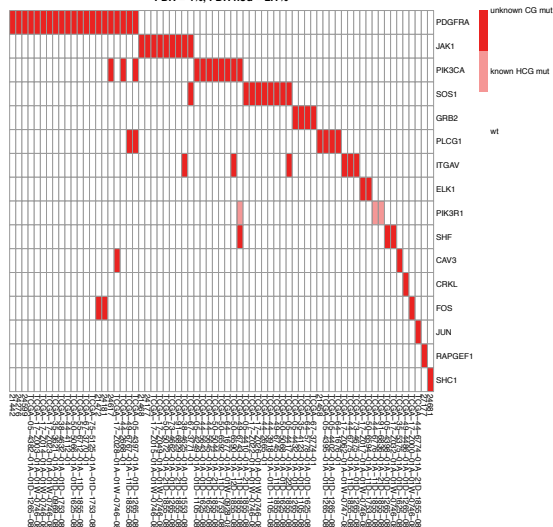

**Signaling By PDGF**  
FDR = 4.2e-07%, FDR nod = 1.7e-06%

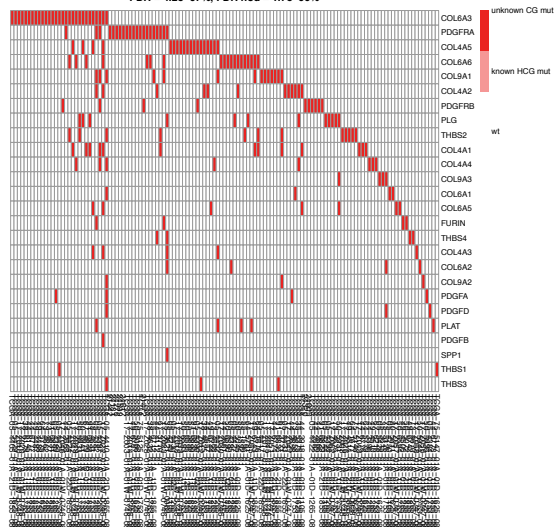

**VEGF And VEGFR Signaling Network**  
**VEGF Binds To VEGFR Leading To Receptor Dimerization**  
**FDR = 1.7e-08%, FDR nod = 0.2%**

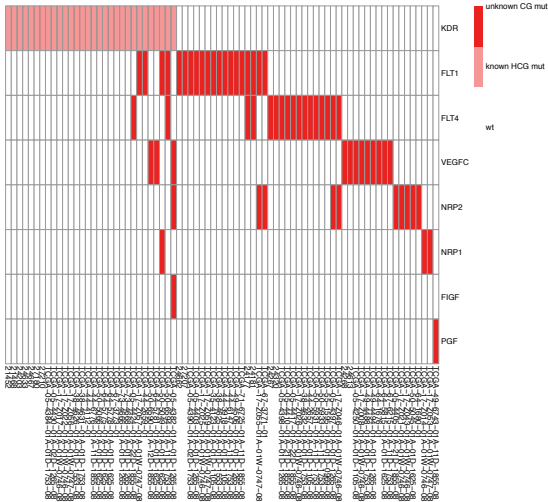

**VEGF Signaling Pathway**  
**FDR = 9e-06%, FDR nod = 0.14%**

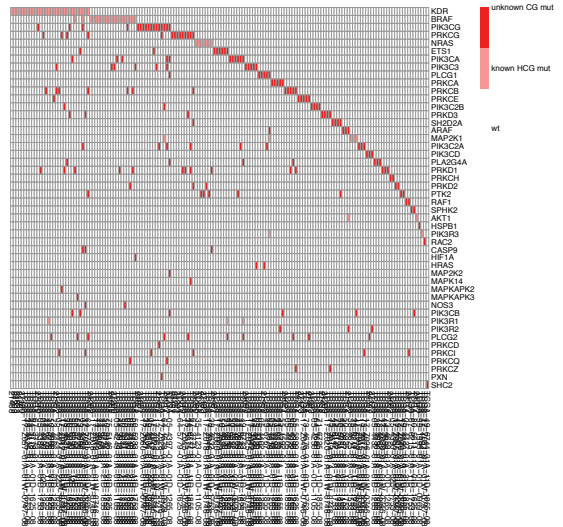

**VEGFR3 Signaling In Lymphatic Endothelium**  
**FDR = 5.6%, FDR nod = 0.73%**

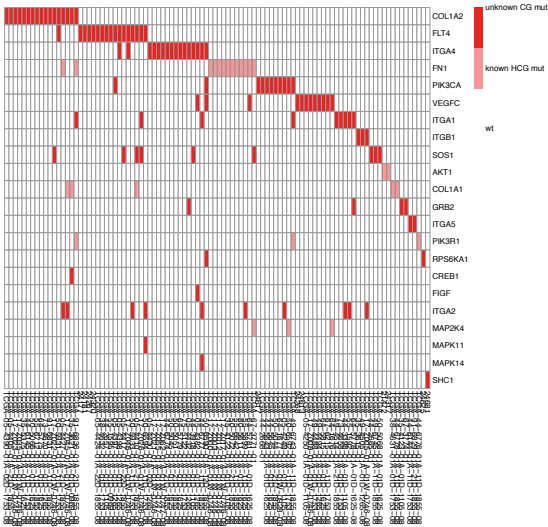

**Homologous DNA Pairing And Strand Exchange**  
**evolution Of D Loop Structures Through Synthesis Dependent Strand Annealing (SDSA)**  
**FDR = 1.1%, FDR nod = 1.1%**

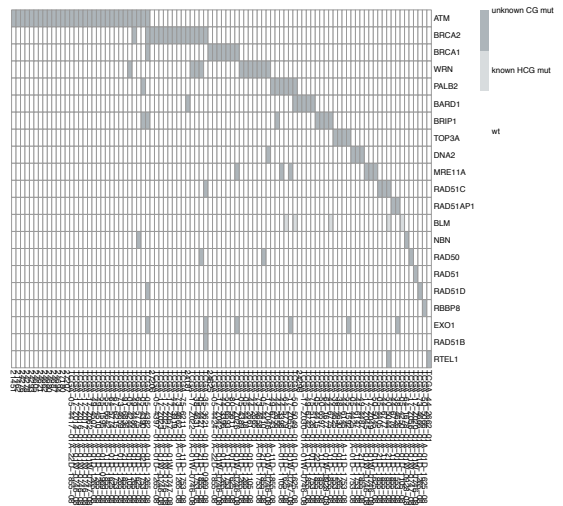

**Presynaptic Phase Of Homologous DNA Pairing And Strand Exchange**  
**FDR = 0.13%, FDR nod = 0.23%**

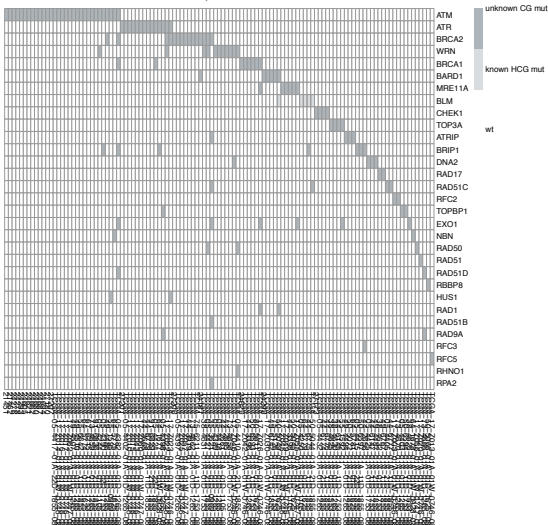

**TRIF Mediated Programmed Cell Death**  
**FDR = 0.00019%, FDR nod = 2.7e-05%**

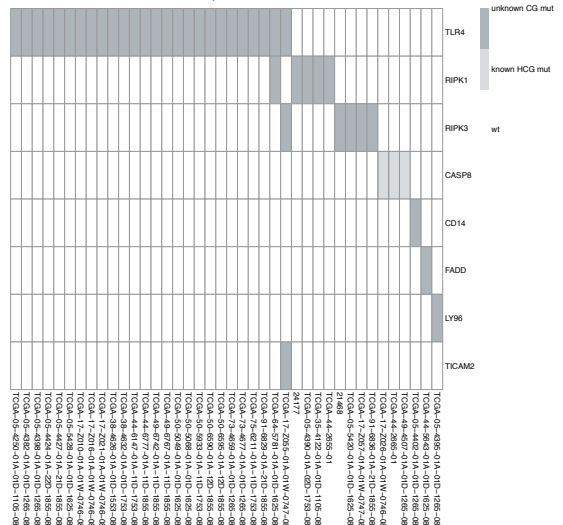





**PI3K Events In ERBB2 Signaling**  
FDR = 9.6e-12%, FDR nod = 0.18%

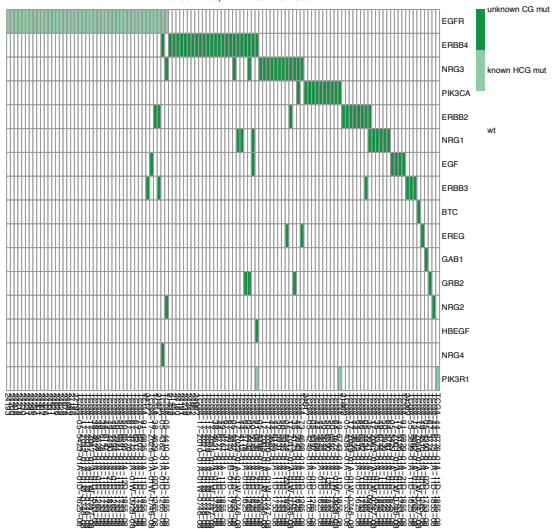

**PI3K Events In ERBB4 Signaling**  
FDR = 0.56%, FDR nod = 0.091%

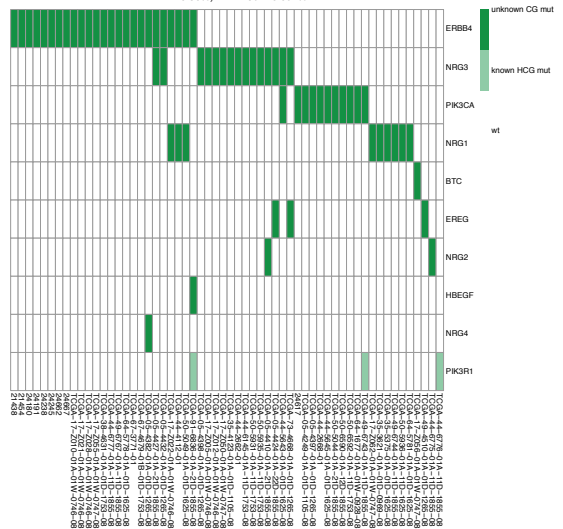

**PI3K/AKT Activation**  
FDR = 5.5%, FDR nod = 0.23%

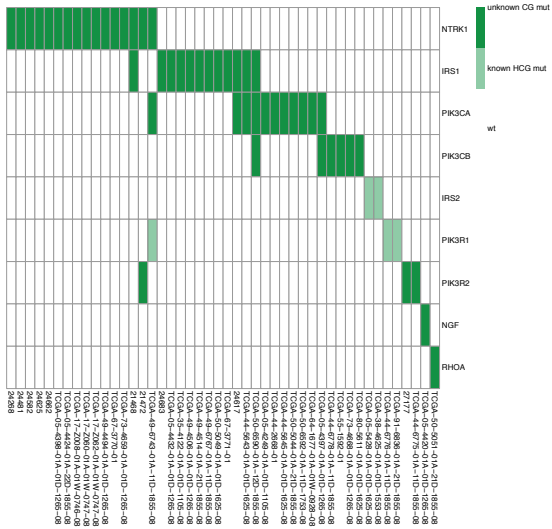

**PIP3 Activates AKT Signaling**  
FDR = 1.6e-10%, FDR nod = 1.4%

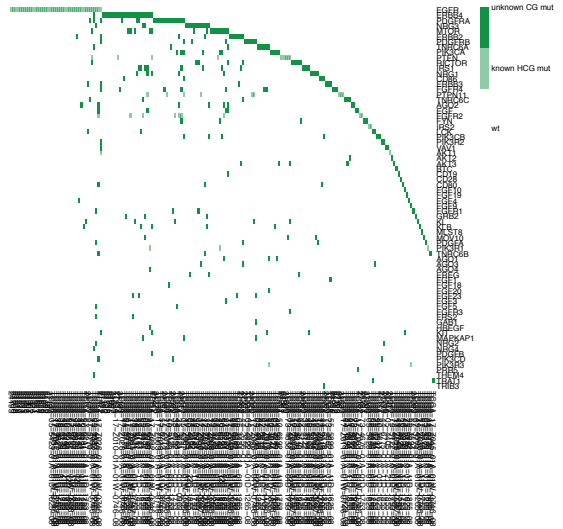

**Prolactin**  
FDR = 2e-12%, FDR nod = 0.00055%

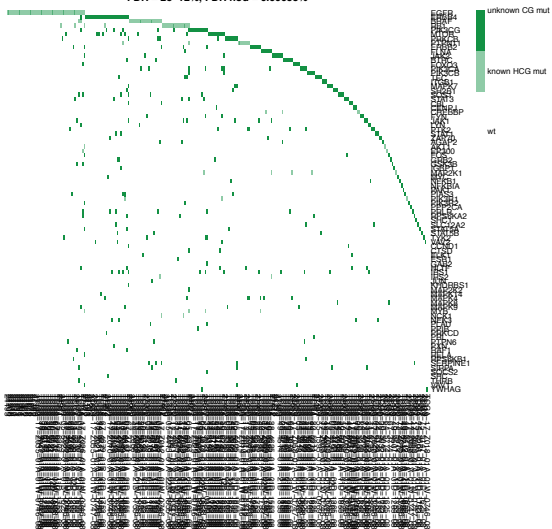

**Signaling To P38 Via RIT And RIN**  
FDR = 1e-09%, FDR nod = 1.1e-05%

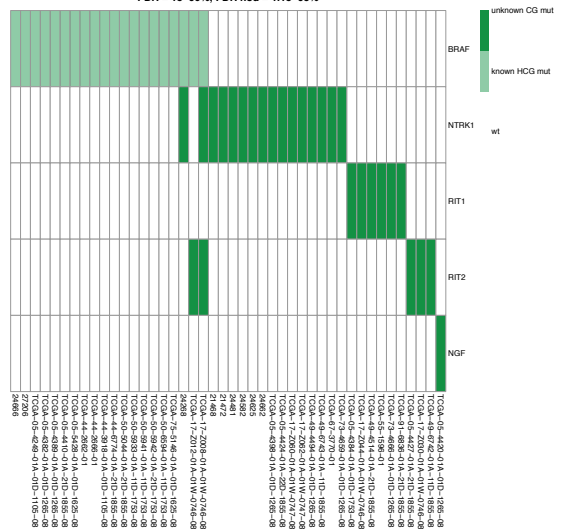

**VEGF Signaling Pathway**  
FDR = 9e-06%, FDR nod = 0.14%

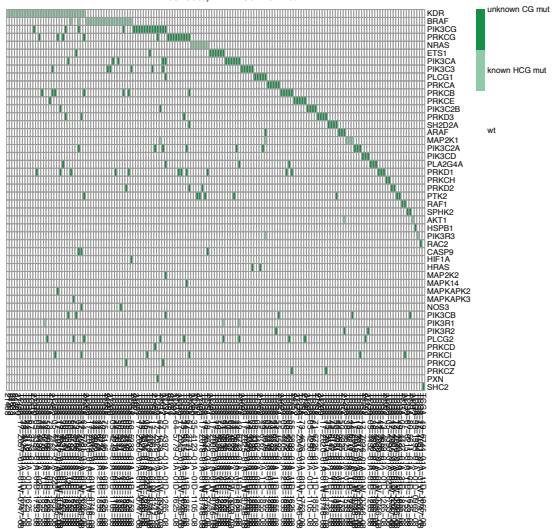

**ignaling Pathway(JAK1 TYK2 STAT1 STAT2) ( IFN Alpha Signaling(JAK1 TYK2 STAT1 STAT2 STAT3) )  
ignaling Pathway(JAK1 TYK2 STAT1 STAT3) ( IFN Alpha Signaling(JAK1 TYK2 STAT1 STAT2 STAT3) )  
ia Signaling Pathway(JAK1 TYK2 STAT1) ( IFN Alpha Signaling(JAK1 TYK2 STAT1 STAT2 STAT3) )  
ia Signaling Pathway(JAK1 TYK2 STAT3) ( IFN Alpha Signaling(JAK1 TYK2 STAT1 STAT2 STAT3) )**  
FDR = 0.0085%, FDR nod = 0.037%

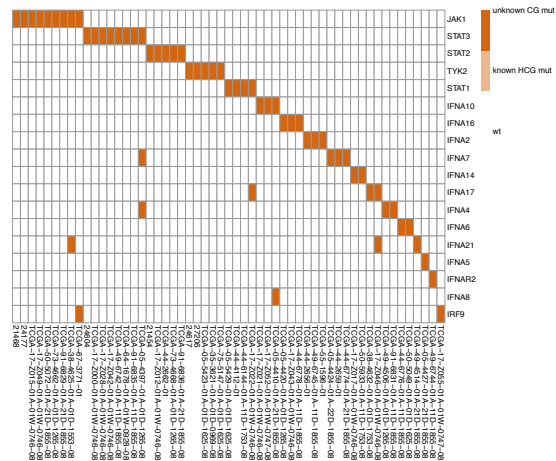

**Gamma Signaling Pathway(JAK1 JAK2 STAT1) ( IFN Gamma Signaling(JAK1 JAK2 STAT1) )**  
FDR = 0.88%, FDR nod = 1.8%

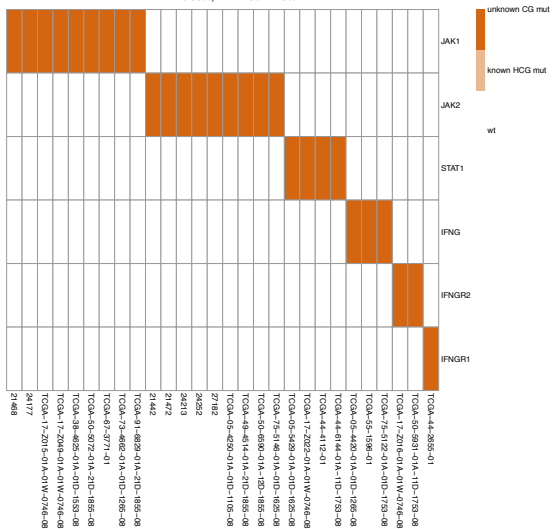

**IL 6 Type Cytokine Receptor Ligand Interactions**  
FDR = 0.74%, FDR nod = 1.4%

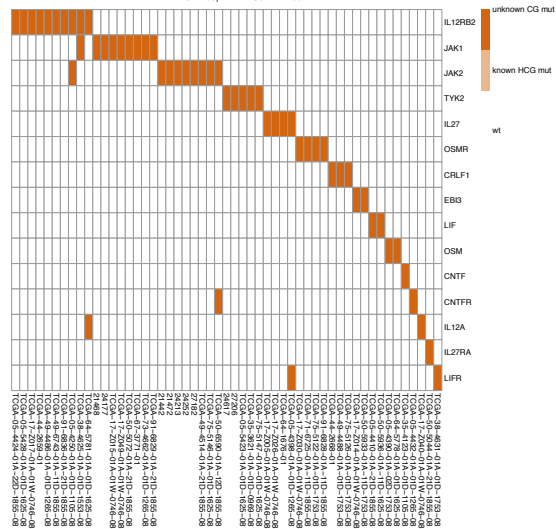

**IRF3 Mediated Induction of Type I IFN**  
FDR = 0.02%, FDR nod = 0.074%

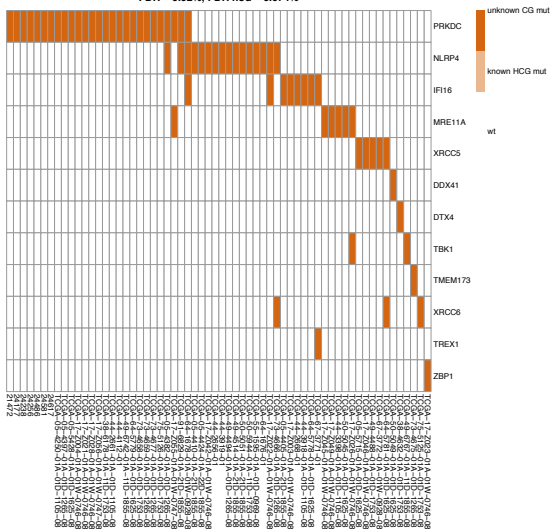

**Regulation of IFN Alpha Signaling**  
FDR = 0.0013%, FDR nod = 0.019%

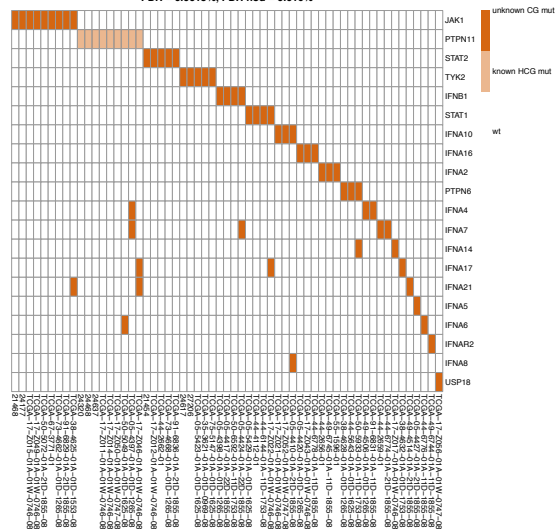

PRAD



**SKCM**

**Activation Of Matrix Metalloproteinases**  
FDR = 0.022%, FDR nod = 0.093%

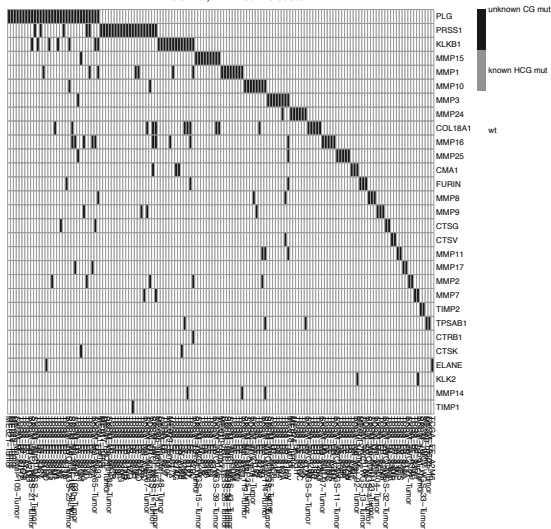

**IRF3 Mediated Activation Of Type 1 IFN**  
FDR = 1.2e-06%, FDR nod = 1.2e-05%

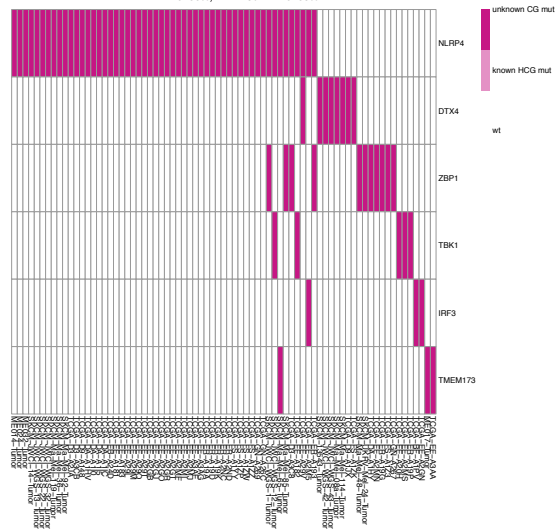

**Mitochondrial Beta Oxidation Of Medium Chain Saturated Fatty Acids**  
FDR = 0.42%, FDR nod = 1.5%

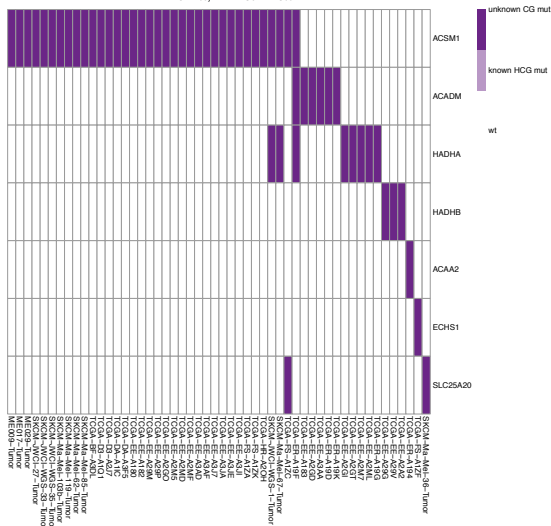

**TP53 Network**  
FDR = 4.2e-12%, FDR nod = 2.1e-05%

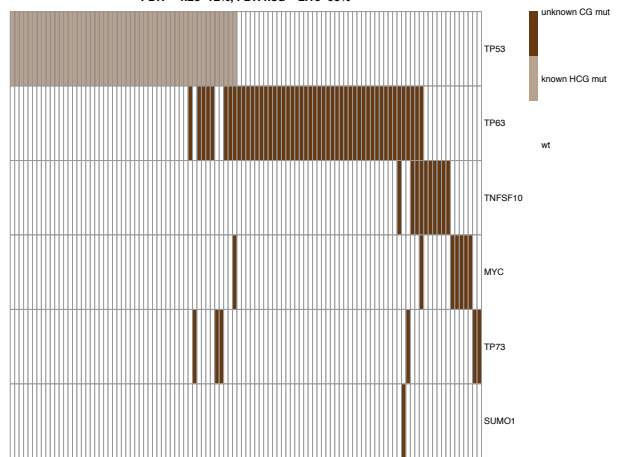

**TP53 Regulates Transcription Of Death Receptors And Ligands**  
FDR = 1.6e-11%, FDR nod = 0.43%

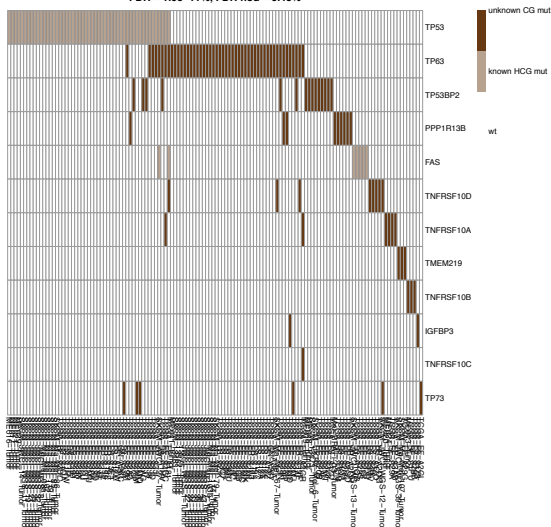

**[CGB Protein Results In Increased Activity Of LHCGR Protein]**  
 e Results In Decreased Activity Of PTGS2 Protein] Inhibits The Reaction [CGB Protein Results In Increased Chen  
 [3, 2 F]quinazoline 1.3 Diamine Binds To F2R Protein] Promotes The Reaction [CGB Protein Results In Increased I  
 ne Inhibits The Reaction [CGB Protein Results In Increased Chemical Synthesis Of Androgens]  
 itrazine Inhibits The Reaction [CGB Protein Results In Increased Secretion Of Cyclic AMP]  
 forsin Promotes The Reaction [CGB Protein Results In Increased Abundance Of Cyclic AMP]  
 Reaction [[Gonadotropins, Equine Co Treated With CGB Protein] Results In Increased Abundance Of Progesterone  
 inhibits The Reaction [[CGB Protein Co Treated With Colforsin] Results In Increased Abundance Of Cyclic AMP]  
 Protein Promotes The Reaction [CGB Protein Results In Increased Abundance Of Progesterone]  
 e Metabolite Inhibits The Reaction [CGB Protein Results In Increased Abundance Of Testosterone]  
 se Chloride Inhibits The Reaction [CGB Protein Results In Increased Expression Of STAR Protein]  
 terone Promotes The Reaction [CGB Protein Results In Increased Expression Of VEGFA MRNA]  
 one Enanthate Inhibits The Reaction [CGB Protein Results In Increased Abundance Of Androgens]  
 FDR = 0.19%, FDR nod = 0.72%

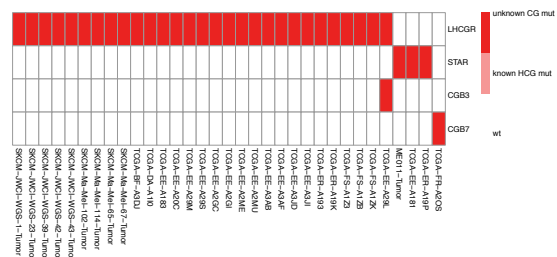

**Neurophilin Interactions With VEGF And VEGFR**  
FDR = 0.05%, FDR nod = 0.21%

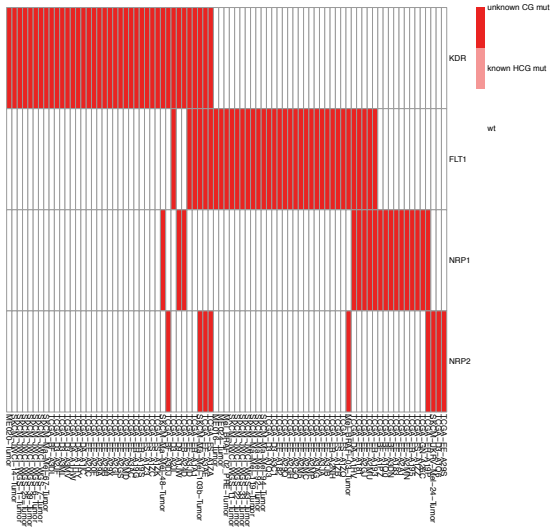

**PDGF Receptor Signaling Network**  
FDR = 0.82%, FDR nod = 2.7%

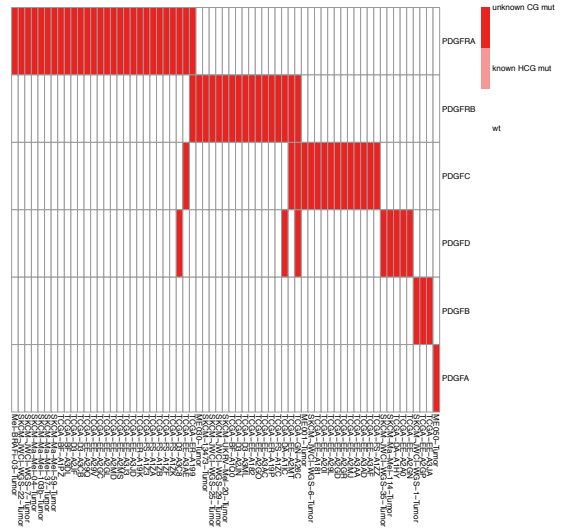

**Tie2 Signaling**  
FDR = 5.6e-12%, FDR nod = 3.7%

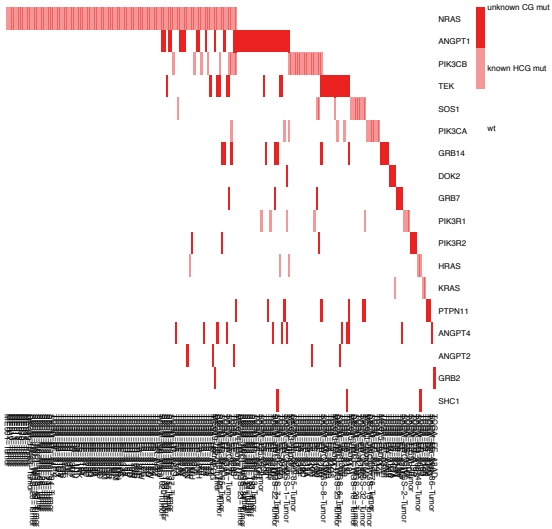

**VEGF And VEGFR Signaling Network**  
VEGF Binds To VEGFR Leading To Receptor Dimerization  
FDR = 0.71%, FDR nod = 2.3%

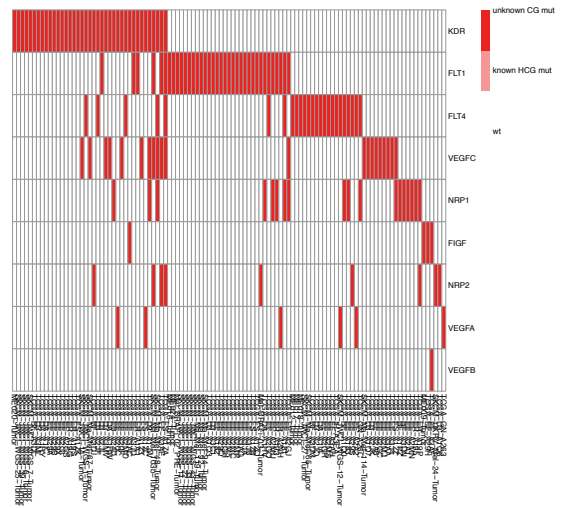

**Apoptotic Cleavage Of Cell Adhesion Proteins**  
FDR = 4.6e-12%, FDR nod = 9.4e-11%

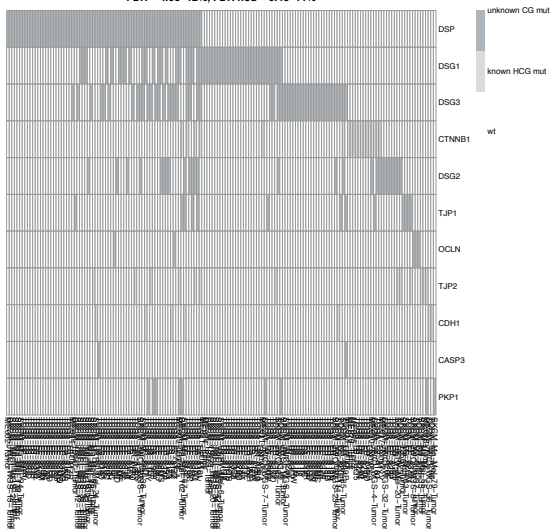

**TP53 Regulates Transcription Of Death Receptors And Ligands**  
FDR = 1.6e-11%, FDR nod = 0.43%

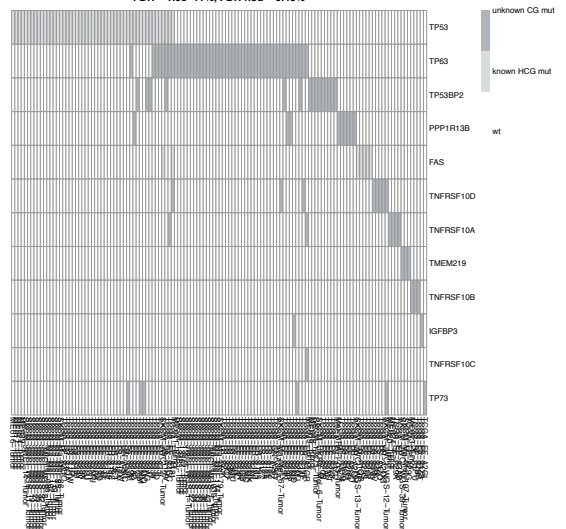

**TRIF Mediated Programmed Cell Death**  
FDR = 0.007%, FDR nod = 0.001%

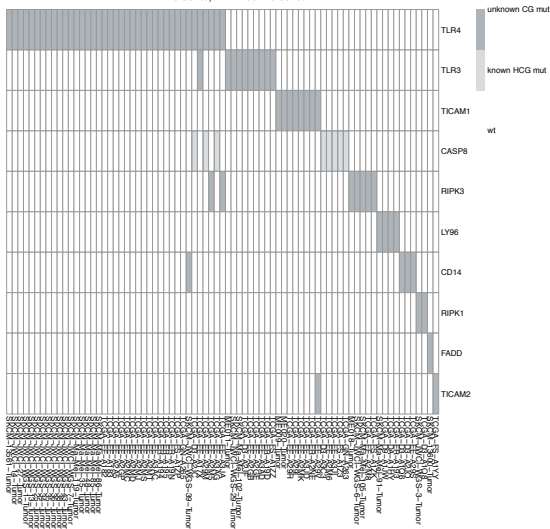

**ErbB Receptor Signaling Network**  
FDR = 1.1%, FDR nod = 1.5%

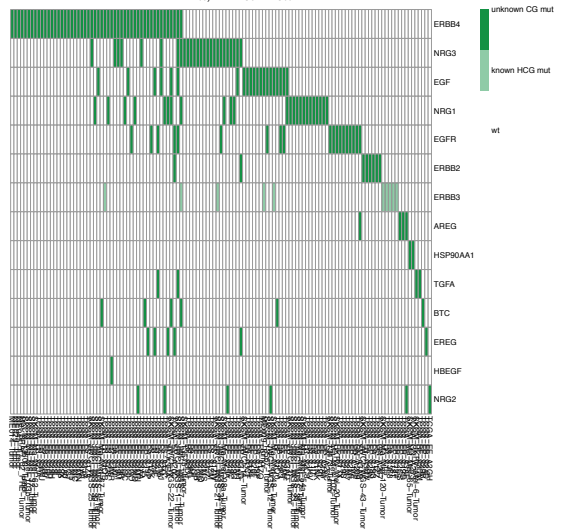

**ERBB2 Activates PTK6 Signaling**  
Signaling By ERBB4  
FDR = 0.43%, FDR nod = 0.48%

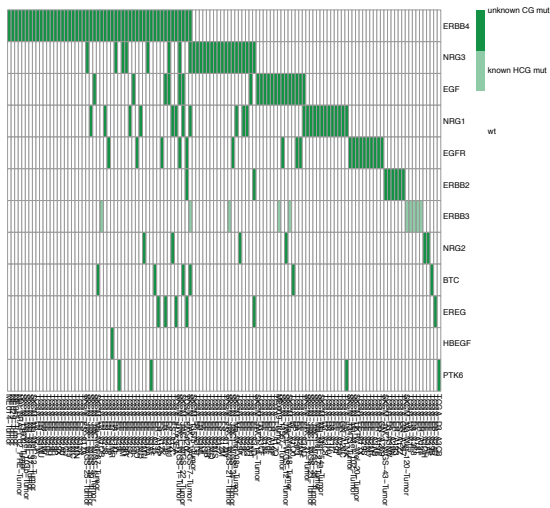

**ERBB2 Regulates Cell Motility**  
FDR = 3.5%, FDR nod = 4.6%

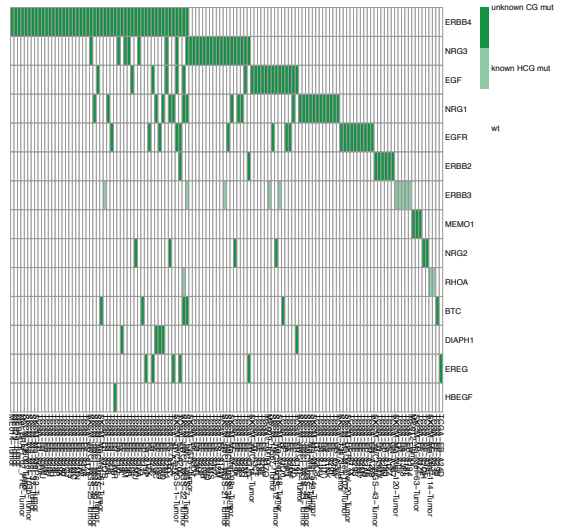

**GRB2:SOS Provides Linkage To MAPK Signaling For Integrins**  
FDR = 0.0059%, FDR nod = 0.0064%

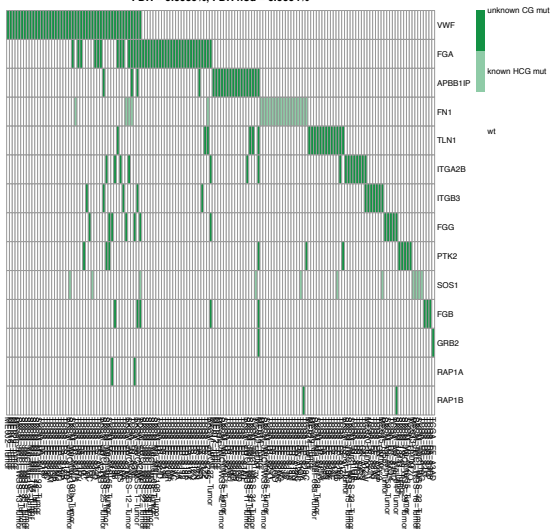

**MyD88 Dependent Cascade Initiated On Endosome**  
TRAF6 Mediated Induction Of NFkB And MAP Kinases Upon TLR7/8 Or 9 Activation  
FDR = 0.85%, FDR nod = 2.7%

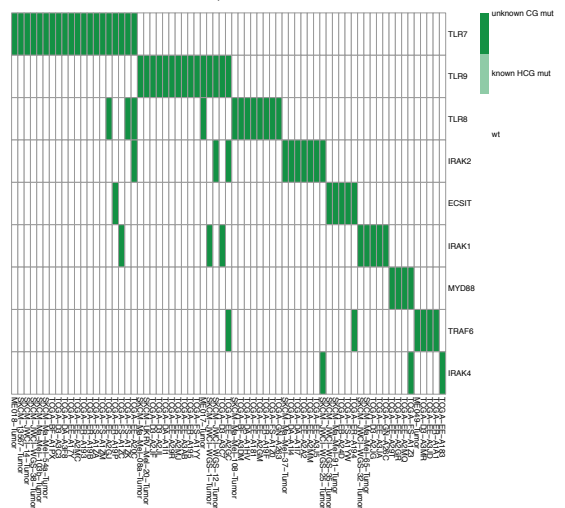

**P130Cas Linkage To MAPK Signaling For Integrins**  
 FDR = 0.0074%, FDR nod = 0.066%

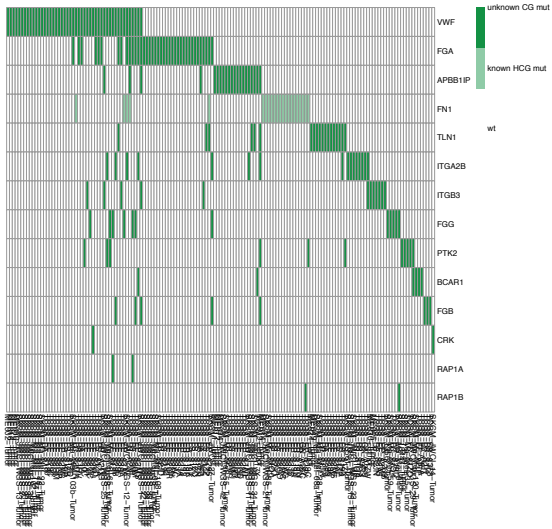

**PI3K Events In ERBB4 Signaling**  
 FDR = 1.1%, FDR nod = 0.02%

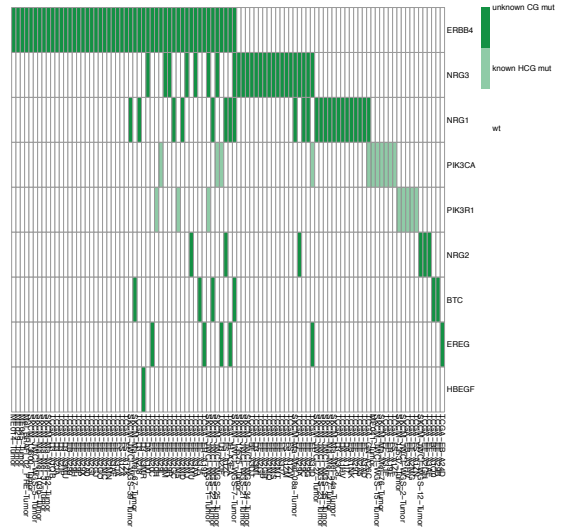

**f Activation Signaling (through RasGRP) ( CD4 T Cell Receptor Signaling (ERK Cascade) )**  
**Raf Activation Signaling (through RasGRP) ( CD4 T Cell Receptor Signaling )**  
 FDR = 3.9e-12%, FDR nod = 1.1%

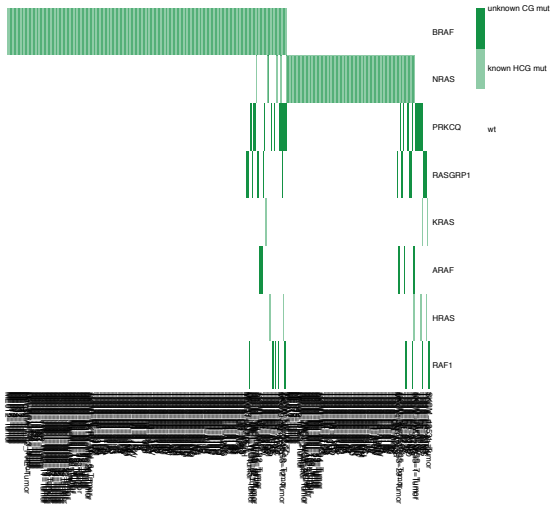

**Signalling To P38 Via RIT And RIN**  
 FDR = 3.9e-12%, FDR nod = 7.5e-05%

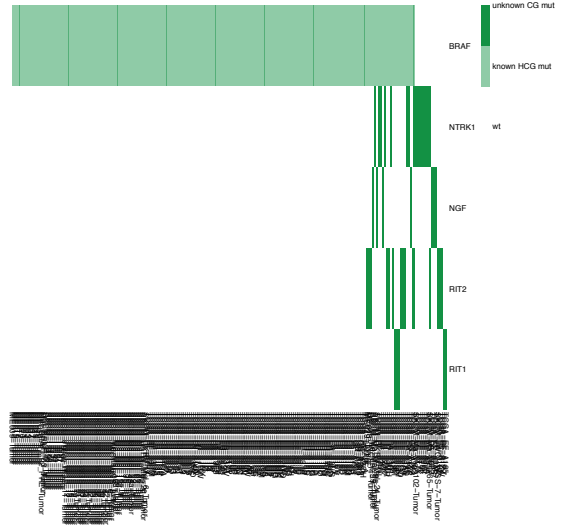

**IL 6 Type Cytokine Receptor Ligand Interactions**  
 FDR = 1.7%, FDR nod = 4.6%

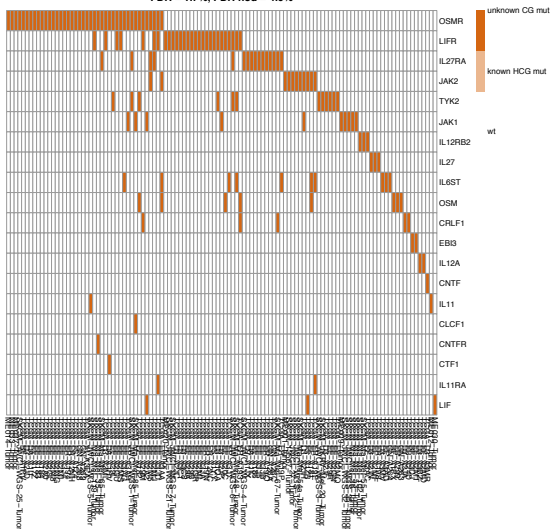

**IRF3 Mediated Activation Of Type 1 IFN**  
 FDR = 1.2e-06%, FDR nod = 1.2e-05%

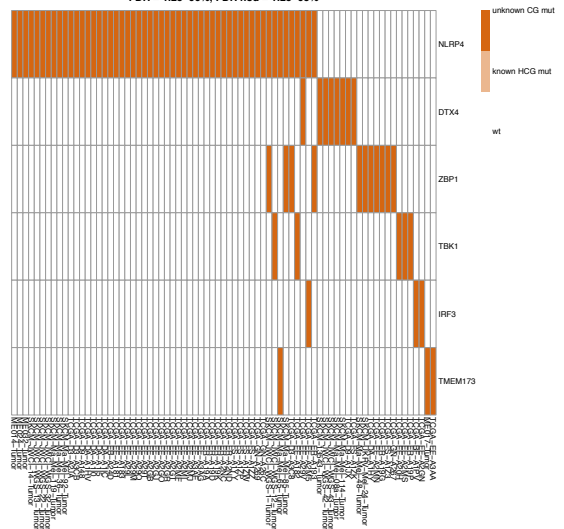

Supplement: MOESM2 [file 41598_2018_25076_MOESM2_ESM-1.pdf]
