# Supplementary material for: Pathway-based dissection of the genomic heterogeneity of cancer hallmarks’ acquisition with SLAPenrich
Source: Sci Rep. 2018 Apr 30;8:6713. doi: 10.1038/s41598-018-25076-6 (PMC5928049; doi:10.1038/s41598-018-25076-6)
Supplement: Supplementary file 3 — Supplementary Table S1 [file 41598_2018_25076_MOESM3_ESM.xlsx]

## Sheet: Additional File 1 - LungDS_KEGG
Pathway	Internal Id	n.genes.in.rep	total Exonic Content Block length	(E)xpected n.mut in path	(O)bserved n.mut in path	log10 (oddRatio=(O/E))	pval	% FDR	ExclusiveCoverage	Mutated Genes	prob 16770	prob 16646	prob 17741	prob 16915	prob 17769	prob 16678	prob 16835	prob 17210	prob 16628	prob 16632	prob 16949	prob 17216	prob 16668	prob 16947	prob 16660	prob 16686	prob 16929	prob 16626	prob 16748	prob 16861	prob 17290	prob 17778	prob 17184	prob 17316	prob 17308	prob 16909	prob 17218	prob 16648	prob 16879	prob 17280	prob 17760	prob 17302	prob 17330	prob 17186	prob 16875	prob 17733	prob 17754	prob 17759	prob 17763
NON SMALL CELL LUNG CANCER	176	54	397477	42.9958	127	0.470378	1.23e-15	1.74e-12	55.1181	TP53 (39.26 %) KRAS (36.81 %) EGFR (18.40 %) CDKN2A ( 5.52 %) RB1 ( 4.29 %) PIK3CG ( 3.07 %) PRKCG ( 2.45 %) ERBB2 ( 1.84 %) BRAF ( 1.84 %) NRAS ( 1.84 %) PRKCB ( 1.23 %) AKT1 ( 1.23 %) FOXO3 ( 1.23 %) PIK3CD ( 1.23 %) PLCG2 ( 1.23 %) PIK3R2 ( 1.23 %) RAF1 ( 0.61 %) AKT3 ( 0.61 %) HRAS ( 0.61 %) ARAF ( 0.61 %) PIK3CA ( 0.61 %) PLCG1 ( 0.61 %)	0.0593458	0.11517	0.167681	0.217075	0.0593458	0.819681	0.840449	0.946955	0.739708	0.705829	0.457624	0.167681	0.9022	0.167681	0.88947	0.830383	0.387029	0.307244	0.167681	0.263538	0.755155	0.11517	0.167681	0.217075	0.387029	0.423406	0.646564	0.423406	0.489812	0.263538	0.263538	0.167681	0.387029	0.263538	0.263538	0.387029	0.11517	0.755155	0.457624
ENDOMETRIAL CANCER	166	52	376089	42.0044	129	0.487295	2.05e-15	1.74e-12	54.2636	TP53 (39.26 %) KRAS (36.81 %) EGFR (18.40 %) APC ( 6.75 %) PIK3CG ( 3.07 %) PTEN ( 2.45 %) ERBB2 ( 1.84 %) BRAF ( 1.84 %) NRAS ( 1.84 %) AKT1 ( 1.23 %) MYC ( 1.23 %) GSK3B ( 1.23 %) CTNNB1 ( 1.23 %) FOXO3 ( 1.23 %) PIK3CD ( 1.23 %) PIK3R2 ( 1.23 %) RAF1 ( 0.61 %) AKT3 ( 0.61 %) HRAS ( 0.61 %) ARAF ( 0.61 %) PIK3CA ( 0.61 %)	0.0575083	0.111709	0.162794	0.21094	0.0575083	0.809555	0.830829	0.941747	0.72829	0.694121	0.446936	0.162794	0.894672	0.162794	0.881426	0.820507	0.377384	0.299085	0.162794	0.256317	0.743916	0.111709	0.162794	0.21094	0.377384	0.41319	0.634643	0.41319	0.478742	0.256317	0.256317	0.162794	0.377384	0.256317	0.256317	0.377384	0.111709	0.743916	0.446936
PROSTATE CANCER	168	89	596366	54.0116	131	0.384784	2.28e-15	1.74e-12	54.9618	TP53 (39.26 %) KRAS (36.81 %) EGFR (18.40 %) RB1 ( 4.29 %) INSRR ( 3.68 %) PDGFRA ( 3.68 %) PIK3CG ( 3.07 %) PTEN ( 2.45 %) PDGFRB ( 1.84 %) ERBB2 ( 1.84 %) BRAF ( 1.84 %) FGFR2 ( 1.84 %) FGFR1 ( 1.84 %) NRAS ( 1.84 %) IGF1R ( 1.23 %) MDM2 ( 1.23 %) AKT1 ( 1.23 %) GSK3B ( 1.23 %) CTNNB1 ( 1.23 %) PIK3CD ( 1.23 %) PIK3R2 ( 1.23 %) RAF1 ( 0.61 %) IKBKB ( 0.61 %) AKT3 ( 0.61 %) HRAS ( 0.61 %) RELA (…	0.0817498	0.156817	0.225747	0.289042	0.0817498	0.908186	0.922584	0.983323	0.846841	0.818356	0.573803	0.225747	0.960869	0.225747	0.953592	0.915692	0.494538	0.400532	0.225747	0.347163	0.859362	0.156817	0.225747	0.289042	0.494538	0.53586	0.765395	0.53586	0.608645	0.347163	0.347163	0.225747	0.494538	0.347163	0.347163	0.494538	0.156817	0.859362	0.573803
PANCREATIC CANCER	165	70	492931	55.1297	127	0.362418	2.37e-15	1.74e-12	56.6929	TP53 (39.26 %) KRAS (36.81 %) EGFR (18.40 %) CDKN2A ( 5.52 %) RB1 ( 4.29 %) PIK3CG ( 3.07 %) ERBB2 ( 1.84 %) BRAF ( 1.84 %) BRCA2 ( 1.23 %) JAK1 ( 1.23 %) AKT1 ( 1.23 %) SMAD4 ( 1.23 %) VEGFC ( 1.23 %) PIK3CD ( 1.23 %) PIK3R2 ( 1.23 %) STAT3 ( 0.61 %) RAF1 ( 0.61 %) IKBKB ( 0.61 %) AKT3 ( 0.61 %) SMAD2 ( 0.61 %) MAPK8 ( 0.61 %) RELA ( 0.61 %) ARAF ( 0.61 %) TGFBR2 ( 0.61 %) TGFBR1 ( 0.61 %) RALB …	0.0842436	0.16139	0.232038	0.296734	0.0842436	0.914918	0.928649	0.985363	0.855736	0.827972	0.585237	0.232038	0.964711	0.232038	0.95792	0.922085	0.505416	0.410234	0.232038	0.355979	0.867889	0.16139	0.232038	0.296734	0.505416	0.547082	0.775994	0.547082	0.620178	0.355979	0.355979	0.232038	0.505416	0.355979	0.355979	0.505416	0.16139	0.867889	0.585237
GLIOMA	167	65	459059	51.9073	130	0.398715	2.45e-15	1.74e-12	53.8462	TP53 (39.26 %) KRAS (36.81 %) EGFR (18.40 %) CDKN2A ( 5.52 %) RB1 ( 4.29 %) PDGFRA ( 3.68 %) PIK3CG ( 3.07 %) PRKCG ( 2.45 %) PTEN ( 2.45 %) PDGFRB ( 1.84 %) BRAF ( 1.84 %) NRAS ( 1.84 %) PRKCB ( 1.23 %) IGF1R ( 1.23 %) MDM2 ( 1.23 %) AKT1 ( 1.23 %) PIK3CD ( 1.23 %) PLCG2 ( 1.23 %) PIK3R2 ( 1.23 %) RAF1 ( 0.61 %) SHC1 ( 0.61 %) AKT3 ( 0.61 %) HRAS ( 0.61 %) SHC3 ( 0.61 %) ARAF ( 0.61 %) PIK3CA ( …	0.077172	0.148388	0.214109	0.274758	0.077172	0.894469	0.910128	0.978826	0.829133	0.799361	0.552072	0.214109	0.95273	0.214109	0.944493	0.902613	0.474024	0.382375	0.214109	0.330726	0.842319	0.148388	0.214109	0.274758	0.474024	0.514614	0.744699	0.514614	0.58664	0.330726	0.330726	0.214109	0.474024	0.330726	0.330726	0.474024	0.148388	0.842319	0.552072
BLADDER CANCER	172	42	263286	27.6262	124	0.652101	2.64e-15	1.74e-12	56.4516	TP53 (39.26 %) KRAS (36.81 %) EGFR (18.40 %) CDKN2A ( 5.52 %) RB1 ( 4.29 %) ERBB2 ( 1.84 %) BRAF ( 1.84 %) NRAS ( 1.84 %) VEGFC ( 1.23 %) MDM2 ( 1.23 %) MYC ( 1.23 %) HRAS ( 0.61 %) RAF1 ( 0.61 %) ARAF ( 0.61 %)	0.033724	0.0663107	0.0977985	0.128224	0.033724	0.617322	0.642698	0.807311	0.529861	0.496472	0.290403	0.0977985	0.728453	0.0977985	0.709168	0.630228	0.240007	0.186032	0.0977985	0.157624	0.545716	0.0663107	0.0977985	0.128224	0.240007	0.265637	0.441889	0.265637	0.314333	0.157624	0.157624	0.0977985	0.240007	0.157624	0.157624	0.240007	0.0663107	0.545716	0.290403
DORSO VENTRAL AXIS FORMATION	107	24	236446	34.8546	93	0.426223	2.75e-15	1.74e-12	88.172	KRAS (36.81 %) EGFR (18.40 %) NOTCH4 ( 1.84 %) NOTCH3 ( 1.23 %) NOTCH1 ( 1.23 %) NOTCH2 ( 0.61 %) ETS1 ( 0.61 %)	0.0450409	0.0880531	0.129128	0.168353	0.0450409	0.724847	0.749075	0.890537	0.637202	0.602172	0.369264	0.129128	0.826451	0.129128	0.809694	0.73724	0.308363	0.241582	0.129128	0.205811	0.653543	0.0880531	0.129128	0.168353	0.308363	0.339515	0.543184	0.339515	0.397673	0.205811	0.205811	0.129128	0.308363	0.205811	0.205811	0.308363	0.0880531	0.653543	0.369264
SMALL CELL LUNG CANCER	175	84	626193	31.3626	72	0.360921	2.95e-15	1.74e-12	75	TP53 (39.26 %) RB1 ( 4.29 %) PIK3CG ( 3.07 %) PTEN ( 2.45 %) PTK2 ( 1.23 %) AKT1 ( 1.23 %) MYC ( 1.23 %) PIK3CD ( 1.23 %) PIK3R2 ( 1.23 %) IKBKB ( 0.61 %) AKT3 ( 0.61 %) RELA ( 0.61 %) CDKN2B ( 0.61 %) PIK3CA ( 0.61 %) CCNE1 ( 0.61 %)	0.0394214	0.0772888	0.113663	0.148604	0.0394214	0.675719	0.700782	0.854929	0.587215	0.552639	0.33115	0.113663	0.783105	0.113663	0.764937	0.688503	0.275125	0.214407	0.113663	0.182167	0.603488	0.0772888	0.113663	0.148604	0.275125	0.3037	0.49527	0.3037	0.357517	0.182167	0.182167	0.113663	0.275125	0.182167	0.182167	0.275125	0.0772888	0.603488	0.33115
ALDOSTERONE REGULATED SODIUM REABSORPTION	150	42	263562	21.2352	73	0.536267	3.19e-15	1.74e-12	90.411	KRAS (36.81 %) PIK3CG ( 3.07 %) PRKCG ( 2.45 %) IRS1 ( 1.84 %) INSR ( 1.84 %) PRKCB ( 1.23 %) PIK3CD ( 1.23 %) PIK3R2 ( 1.23 %) PIK3CA ( 0.61 %)	0.0246803	0.0487515	0.0722286	0.0951263	0.0246803	0.503275	0.527492	0.698661	0.422923	0.393348	0.221121	0.0722286	0.613112	0.0722286	0.593284	0.515535	0.181204	0.13924	0.0722286	0.117459	0.437166	0.0487515	0.0722286	0.0951263	0.181204	0.201412	0.346119	0.201412	0.240344	0.117459	0.117459	0.0722286	0.181204	0.117459	0.117459	0.181204	0.0487515	0.437166	0.221121
HUNTINGTONS DISEASE	156	180	900998	8.81432	66	0.874355	3.28e-15	1.74e-12	96.9697	TP53 (39.26 %) BAX ( 0.61 %) HTT ( 0.61 %)	0.00934425	0.0186012	0.0277716	0.0368564	0.00934425	0.231157	0.245459	0.362775	0.186606	0.171189	0.0896096	0.0277716	0.300053	0.0277716	0.286787	0.238342	0.0723543	0.054772	0.0277716	0.0458562	0.194207	0.0186012	0.0277716	0.0368564	0.0723543	0.0810225	0.147515	0.0810225	0.0981166	0.0458562	0.0458562	0.0277716	0.0723543	0.0458562	0.0458562	0.0723543	0.0186012	0.194207	0.0896096
REGULATION OF ACTIN CYTOSKELETON	141	213	1414425	51.0825	111	0.337051	3.43e-15	1.74e-12	63.964	KRAS (36.81 %) EGFR (18.40 %) APC ( 6.75 %) FGFR4 ( 4.29 %) PDGFRA ( 3.68 %) INSRR ( 3.68 %) PAK3 ( 3.07 %) PIK3CG ( 3.07 %) PAK7 ( 2.45 %) NRAS ( 1.84 %) FGFR2 ( 1.84 %) FGFR1 ( 1.84 %) PAK4 ( 1.84 %) PDGFRB ( 1.84 %) BRAF ( 1.84 %) PTK2 ( 1.23 %) PAK6 ( 1.23 %) VAV3 ( 1.23 %) VAV1 ( 1.23 %) VAV2 ( 1.23 %) PIK3CD ( 1.23 %) PIK3R2 ( 1.23 %) ROCK1 ( 0.61 %) HRAS ( 0.61 %) RAF1 ( 0.61 %) ARAF ( 0.6…	0.0754178	0.145148	0.209619	0.269227	0.0754178	0.888705	0.904859	0.976805	0.821843	0.791594	0.543485	0.209619	0.949192	0.209619	0.940565	0.897099	0.465972	0.375297	0.209619	0.324341	0.83528	0.145148	0.209619	0.269227	0.465972	0.506247	0.736322	0.506247	0.577914	0.324341	0.324341	0.209619	0.465972	0.324341	0.324341	0.465972	0.145148	0.83528	0.543485
ACUTE MYELOID LEUKEMIA	174	57	375010	37.1871	80	0.332698	3.89e-15	1.74e-12	87.5	KRAS (36.81 %) PIK3CG ( 3.07 %) BRAF ( 1.84 %) NRAS ( 1.84 %) JUP ( 1.23 %) AKT1 ( 1.23 %) STAT5B ( 1.23 %) MYC ( 1.23 %) PIK3CD ( 1.23 %) PIK3R2 ( 1.23 %) STAT3 ( 0.61 %) RAF1 ( 0.61 %) PIM2 ( 0.61 %) KIT ( 0.61 %) IKBKB ( 0.61 %) AKT3 ( 0.61 %) STAT5A ( 0.61 %) HRAS ( 0.61 %) RELA ( 0.61 %) ARAF ( 0.61 %) PIK3CA ( 0.61 %)	0.0489616	0.095526	0.13981	0.181927	0.0489616	0.754786	0.77821	0.910152	0.668596	0.633595	0.394686	0.13981	0.851569	0.13981	0.835892	0.766792	0.330756	0.260074	0.13981	0.221981	0.684823	0.095526	0.13981	0.181927	0.330756	0.363523	0.574042	0.363523	0.424323	0.221981	0.221981	0.13981	0.330756	0.221981	0.221981	0.330756	0.095526	0.684823	0.394686
AMYOTROPHIC LATERAL SCLEROSIS ALS	155	53	328450	4.77735	65	1.13373	4.05e-15	1.74e-12	95.3846	TP53 (39.26 %) BAX ( 0.61 %) MAP2K6 ( 0.61 %)	0.00492045	0.00981668	0.0146888	0.019537	0.00492045	0.128999	0.13755	0.210823	0.102836	0.0939419	0.0481291	0.0146888	0.17092	0.0146888	0.1627	0.133285	0.0386923	0.0291619	0.0146888	0.0243613	0.107251	0.00981668	0.0146888	0.019537	0.0386923	0.0434224	0.0804345	0.0434224	0.0528128	0.0243613	0.0243613	0.0146888	0.0386923	0.0243613	0.0243613	0.0386923	0.00981668	0.107251	0.0481291
MELANOMA	171	71	454763	46.7122	130	0.444513	4.16e-15	1.74e-12	54.6154	TP53 (39.26 %) KRAS (36.81 %) EGFR (18.40 %) CDKN2A ( 5.52 %) RB1 ( 4.29 %) PDGFRA ( 3.68 %) PIK3CG ( 3.07 %) PTEN ( 2.45 %) PDGFRB ( 1.84 %) BRAF ( 1.84 %) FGFR1 ( 1.84 %) NRAS ( 1.84 %) MET ( 1.84 %) IGF1R ( 1.23 %) MDM2 ( 1.23 %) AKT1 ( 1.23 %) PIK3CD ( 1.23 %) PIK3R2 ( 1.23 %) RAF1 ( 0.61 %) AKT3 ( 0.61 %) HRAS ( 0.61 %) ARAF ( 0.61 %) PIK3CA ( 0.61 %)	0.0664857	0.128551	0.18649	0.240577	0.0664857	0.854324	0.873051	0.963204	0.779879	0.747408	0.497415	0.18649	0.926786	0.18649	0.915985	0.86401	0.423276	0.338201	0.18649	0.291068	0.794514	0.128551	0.18649	0.240577	0.423276	0.46162	0.689504	0.46162	0.53083	0.291068	0.291068	0.18649	0.423276	0.291068	0.291068	0.423276	0.128551	0.794514	0.497415
COLORECTAL CANCER	163	62	445335	48.9026	113	0.363747	4.21e-15	1.74e-12	61.0619	TP53 (39.26 %) KRAS (36.81 %) APC ( 6.75 %) PIK3CG ( 3.07 %) MSH6 ( 2.45 %) BRAF ( 1.84 %) AKT1 ( 1.23 %) SMAD4 ( 1.23 %) MYC ( 1.23 %) GSK3B ( 1.23 %) CTNNB1 ( 1.23 %) PIK3CD ( 1.23 %) FOS ( 1.23 %) PIK3R2 ( 1.23 %) RAF1 ( 0.61 %) BAX ( 0.61 %) AKT3 ( 0.61 %) SMAD2 ( 0.61 %) MAPK8 ( 0.61 %) ARAF ( 0.61 %) TGFBR2 ( 0.61 %) TGFBR1 ( 0.61 %) PIK3CA ( 0.61 %)	0.0708876	0.13675	0.197944	0.2548	0.0708876	0.872382	0.889834	0.970672	0.801618	0.770192	0.520617	0.197944	0.938822	0.197944	0.929131	0.881429	0.444677	0.356706	0.197944	0.307625	0.815681	0.13675	0.197944	0.2548	0.444677	0.484042	0.713477	0.484042	0.5546	0.307625	0.307625	0.197944	0.444677	0.307625	0.307625	0.444677	0.13675	0.815681	0.520617
TIGHT JUNCTION	117	131	903070	35.1855	82	0.36745	4.31e-15	1.74e-12	89.0244	KRAS (36.81 %) PRKCG ( 2.45 %) PTEN ( 2.45 %) NRAS ( 1.84 %) PRKCE ( 1.84 %) AKT1 ( 1.23 %) YES1 ( 1.23 %) PRKCB ( 1.23 %) CTNNB1 ( 1.23 %) AKT3 ( 0.61 %) CASK ( 0.61 %) PRKCI ( 0.61 %) PRKCH ( 0.61 %) PRKCD ( 0.61 %) PRKCQ ( 0.61 %) HRAS ( 0.61 %) MRAS ( 0.61 %) SRC ( 0.61 %)	0.0455888	0.0890992	0.130626	0.17026	0.0455888	0.729233	0.753358	0.893511	0.641754	0.606712	0.372873	0.130626	0.830195	0.130626	0.813586	0.741577	0.311531	0.244189	0.130626	0.208087	0.658086	0.0890992	0.130626	0.17026	0.311531	0.342918	0.547619	0.342918	0.401463	0.208087	0.208087	0.130626	0.311531	0.208087	0.208087	0.311531	0.0890992	0.658086	0.372873
CHRONIC MYELOID LEUKEMIA	173	73	499821	51.6392	115	0.347718	4.4e-15	1.74e-12	60	TP53 (39.26 %) KRAS (36.81 %) CDKN2A ( 5.52 %) RB1 ( 4.29 %) PIK3CG ( 3.07 %) PTPN11 ( 1.84 %) BRAF ( 1.84 %) NRAS ( 1.84 %) MDM2 ( 1.23 %) ABL1 ( 1.23 %) AKT1 ( 1.23 %) STAT5B ( 1.23 %) SMAD4 ( 1.23 %) MYC ( 1.23 %) CBLB ( 1.23 %) PIK3CD ( 1.23 %) PIK3R2 ( 1.23 %) RAF1 ( 0.61 %) SHC1 ( 0.61 %) MECOM ( 0.61 %) IKBKB ( 0.61 %) AKT3 ( 0.61 %) STAT5A ( 0.61 %) HRAS ( 0.61 %) RELA ( 0.61 %) SHC3 ( 0.…	0.0765994	0.147331	0.212645	0.272956	0.0765994	0.89262	0.90844	0.978186	0.826786	0.796856	0.549285	0.212645	0.951602	0.212645	0.94324	0.900845	0.471407	0.380072	0.212645	0.328647	0.840054	0.147331	0.212645	0.272956	0.471407	0.511897	0.741992	0.511897	0.58381	0.328647	0.328647	0.212645	0.471407	0.328647	0.328647	0.471407	0.147331	0.840054	0.549285
P53 SIGNALING PATHWAY	95	68	378141	30.9948	85	0.43813	4.47e-15	1.74e-12	80	TP53 (39.26 %) ATM ( 7.98 %) CDKN2A ( 5.52 %) PTEN ( 2.45 %) TSC2 ( 1.84 %) MDM2 ( 1.23 %) TP73 ( 0.61 %) BAX ( 0.61 %) ATR ( 0.61 %) CHEK1 ( 0.61 %) CCNG1 ( 0.61 %) CCNE1 ( 0.61 %) CCNB3 ( 0.61 %)	0.0388464	0.0761838	0.112071	0.146564	0.0388464	0.67024	0.695362	0.850702	0.581745	0.547253	0.327135	0.112071	0.778116	0.112071	0.759818	0.68305	0.271646	0.211582	0.112071	0.179717	0.597993	0.0761838	0.112071	0.146564	0.271646	0.29994	0.490109	0.29994	0.353274	0.179717	0.179717	0.112071	0.271646	0.179717	0.179717	0.271646	0.0761838	0.597993	0.327135
THYROID CANCER	169	29	194680	16.1729	107	0.820597	4.5e-15	1.74e-12	66.3551	TP53 (39.26 %) KRAS (36.81 %) NTRK1 ( 4.29 %) BRAF ( 1.84 %) RET ( 1.84 %) NRAS ( 1.84 %) CTNNB1 ( 1.23 %) MYC ( 1.23 %) HRAS ( 0.61 %)	0.018095	0.0358626	0.0533088	0.0704392	0.018095	0.400285	0.421793	0.58377	0.330843	0.305953	0.166905	0.0533088	0.500381	0.0533088	0.481796	0.411137	0.135917	0.103776	0.0533088	0.0872596	0.342951	0.0358626	0.0533088	0.0704392	0.135917	0.151552	0.26687	0.151552	0.18198	0.0872596	0.0872596	0.0533088	0.135917	0.0872596	0.0872596	0.135917	0.0358626	0.342951	0.166905
B CELL RECEPTOR SIGNALING PATHWAY	130	75	458606	38.4066	80	0.318684	4.79e-15	1.74e-12	87.5	KRAS (36.81 %) PIK3CG ( 3.07 %) NRAS ( 1.84 %) PRKCB ( 1.23 %) VAV1 ( 1.23 %) AKT1 ( 1.23 %) VAV2 ( 1.23 %) GSK3B ( 1.23 %) PIK3CD ( 1.23 %) PLCG2 ( 1.23 %) FOS ( 1.23 %) VAV3 ( 1.23 %) PIK3R2 ( 1.23 %) RAF1 ( 0.61 %) IKBKB ( 0.61 %) AKT3 ( 0.61 %) HRAS ( 0.61 %) RELA ( 0.61 %) SYK ( 0.61 %) PIK3CA ( 0.61 %)	0.0510669	0.0995259	0.14551	0.189146	0.0510669	0.769539	0.792476	0.919219	0.684366	0.64948	0.407953	0.14551	0.863556	0.14551	0.848476	0.781308	0.342516	0.269847	0.14551	0.230554	0.700485	0.0995259	0.14551	0.189146	0.342516	0.376092	0.589791	0.376092	0.438187	0.230554	0.230554	0.14551	0.342516	0.230554	0.230554	0.342516	0.0995259	0.700485	0.407953
BASAL CELL CARCINOMA	170	55	321594	20.3773	78	0.582948	5.29e-15	1.74e-12	84.6154	TP53 (39.26 %) APC ( 6.75 %) PTCH1 ( 3.07 %) PTCH2 ( 1.23 %) GSK3B ( 1.23 %) CTNNB1 ( 1.23 %) STK36 ( 1.23 %) SMO ( 0.61 %)	0.0235298	0.0465059	0.0689414	0.0908491	0.0235298	0.486605	0.510481	0.681117	0.40776	0.378874	0.211884	0.0689414	0.595385	0.0689414	0.57565	0.498685	0.173445	0.13313	0.0689414	0.112241	0.421695	0.0465059	0.0689414	0.0908491	0.173445	0.192893	0.332882	0.192893	0.230428	0.112241	0.112241	0.0689414	0.173445	0.112241	0.112241	0.173445	0.0465059	0.421695	0.211884
GAP JUNCTION	118	90	613404	36.7352	104	0.45195	5.33e-15	1.74e-12	76.9231	KRAS (36.81 %) EGFR (18.40 %) GNAS ( 4.29 %) PDGFRA ( 3.68 %) PRKCG ( 2.45 %) PDGFRB ( 1.84 %) NRAS ( 1.84 %) PRKACB ( 1.84 %) PRKCB ( 1.23 %) MAP2K5 ( 1.23 %) MAP3K2 ( 1.23 %) RAF1 ( 0.61 %) MAPK7 ( 0.61 %) PRKG1 ( 0.61 %) HRAS ( 0.61 %) PRKX ( 0.61 %) SRC ( 0.61 %) PRKACA ( 0.61 %)	0.0481913	0.0940603	0.137719	0.179273	0.0481913	0.749164	0.772757	0.906592	0.662641	0.627614	0.389766	0.137719	0.846931	0.137719	0.831039	0.761252	0.326407	0.256471	0.137719	0.218825	0.678899	0.0940603	0.137719	0.179273	0.326407	0.358869	0.568139	0.358869	0.419174	0.218825	0.218825	0.137719	0.326407	0.218825	0.218825	0.326407	0.0940603	0.678899	0.389766
LONG TERM DEPRESSION	138	70	491186	25.3354	78	0.488367	5.56e-15	1.74e-12	92.3077	KRAS (36.81 %) GNAS ( 4.29 %) PRKCG ( 2.45 %) BRAF ( 1.84 %) NRAS ( 1.84 %) PRKCB ( 1.23 %) IGF1R ( 1.23 %) RAF1 ( 0.61 %) PRKG1 ( 0.61 %) HRAS ( 0.61 %) ARAF ( 0.61 %)	0.0303839	0.0598446	0.0884102	0.116108	0.0303839	0.578502	0.603727	0.772599	0.49278	0.460494	0.265489	0.0884102	0.690405	0.0884102	0.670699	0.591309	0.218735	0.169004	0.0884102	0.142964	0.508192	0.0598446	0.0884102	0.116108	0.218735	0.242472	0.40817	0.242472	0.287806	0.142964	0.142964	0.0884102	0.218735	0.142964	0.142964	0.218735	0.0598446	0.508192	0.265489
GNRH SIGNALING PATHWAY	143	101	640617	36.7334	104	0.451972	5.73e-15	1.74e-12	81.7308	KRAS (36.81 %) EGFR (18.40 %) GNAS ( 4.29 %) MAP3K3 ( 1.84 %) MAP3K4 ( 1.84 %) NRAS ( 1.84 %) PRKACB ( 1.84 %) MAP3K2 ( 1.23 %) PRKCB ( 1.23 %) PRKX ( 0.61 %) PRKACA ( 0.61 %) RAF1 ( 0.61 %) PRKCD ( 0.61 %) MAP2K6 ( 0.61 %) MAPK7 ( 0.61 %) HRAS ( 0.61 %) MAPK8 ( 0.61 %) SRC ( 0.61 %)	0.0481881	0.0940542	0.13771	0.179262	0.0481881	0.74914	0.772735	0.906577	0.662616	0.627589	0.389745	0.13771	0.846912	0.13771	0.831018	0.761229	0.326389	0.256456	0.13771	0.218812	0.678874	0.0940542	0.13771	0.179262	0.326389	0.35885	0.568114	0.35885	0.419152	0.218812	0.218812	0.13771	0.326389	0.218812	0.218812	0.326389	0.0940542	0.678874	0.389745
ERBB SIGNALING PATHWAY	87	87	607194	62.7518	118	0.274256	5.83e-15	1.74e-12	69.4915	KRAS (36.81 %) EGFR (18.40 %) ERBB4 ( 4.91 %) PAK3 ( 3.07 %) PIK3CG ( 3.07 %) PRKCG ( 2.45 %) PAK7 ( 2.45 %) PAK4 ( 1.84 %) ERBB2 ( 1.84 %) ERBB3 ( 1.84 %) BRAF ( 1.84 %) NRAS ( 1.84 %) PRKCB ( 1.23 %) PTK2 ( 1.23 %) ABL1 ( 1.23 %) AKT1 ( 1.23 %) STAT5B ( 1.23 %) PAK6 ( 1.23 %) MYC ( 1.23 %) GSK3B ( 1.23 %) CBLB ( 1.23 %) PIK3CD ( 1.23 %) PLCG2 ( 1.23 %) PIK3R2 ( 1.23 %) RAF1 ( 0.61 %) SHC1 ( 0.6…	0.102459	0.19442	0.276959	0.351041	0.102459	0.951525	0.960949	0.99442	0.907275	0.884897	0.660732	0.276959	0.983554	0.276959	0.979585	0.956491	0.578852	0.477212	0.276959	0.417533	0.916776	0.19442	0.276959	0.351041	0.578852	0.622003	0.840807	0.622003	0.695493	0.417533	0.417533	0.276959	0.578852	0.417533	0.417533	0.578852	0.19442	0.916776	0.660732
APOPTOSIS	103	87	498034	36.9909	85	0.361324	6.01e-15	1.74e-12	77.6471	TP53 (39.26 %) ATM ( 7.98 %) NTRK1 ( 4.29 %) PIK3CG ( 3.07 %) IRAK2 ( 1.84 %) PRKACB ( 1.84 %) AKT1 ( 1.23 %) IRAK1 ( 1.23 %) PIK3CD ( 1.23 %) PIK3R2 ( 1.23 %) RIPK1 ( 0.61 %) BAX ( 0.61 %) IKBKB ( 0.61 %) AKT3 ( 0.61 %) RELA ( 0.61 %) PRKX ( 0.61 %) PRKACA ( 0.61 %) PIK3CA ( 0.61 %) PRKAR1A ( 0.61 %)	0.0486265	0.0948885	0.138901	0.180773	0.0486265	0.752355	0.775854	0.90862	0.666018	0.631005	0.39255	0.138901	0.849568	0.138901	0.833798	0.764397	0.328867	0.258508	0.138901	0.220609	0.682258	0.0948885	0.138901	0.180773	0.328867	0.361502	0.571483	0.361502	0.422088	0.220609	0.220609	0.138901	0.328867	0.220609	0.220609	0.328867	0.0948885	0.682258	0.39255
RENAL CELL CARCINOMA	164	70	465889	39.774	83	0.319479	6.58e-15	1.8e-12	77.1084	KRAS (36.81 %) PAK3 ( 3.07 %) PIK3CG ( 3.07 %) PAK7 ( 2.45 %) PTPN11 ( 1.84 %) PAK4 ( 1.84 %) BRAF ( 1.84 %) NRAS ( 1.84 %) MET ( 1.84 %) AKT1 ( 1.23 %) PAK6 ( 1.23 %) FH ( 1.23 %) VEGFC ( 1.23 %) PIK3CD ( 1.23 %) PIK3R2 ( 1.23 %) RAF1 ( 0.61 %) RAPGEF1 ( 0.61 %) AKT3 ( 0.61 %) ETS1 ( 0.61 %) HRAS ( 0.61 %) ARAF ( 0.61 %) VHL ( 0.61 %) PIK3CA ( 0.61 %)	0.0534739	0.104088	0.151996	0.197342	0.0534739	0.785359	0.807701	0.92849	0.701519	0.666841	0.422801	0.151996	0.876109	0.151996	0.861716	0.796837	0.355741	0.28089	0.151996	0.240264	0.71748	0.104088	0.151996	0.197342	0.355741	0.390192	0.607125	0.390192	0.453666	0.240264	0.240264	0.151996	0.355741	0.240264	0.240264	0.355741	0.104088	0.71748	0.422801
LONG TERM POTENTIATION	136	70	540176	25.1785	76	0.479784	6.67e-15	1.8e-12	89.4737	KRAS (36.81 %) PRKCG ( 2.45 %) BRAF ( 1.84 %) NRAS ( 1.84 %) PRKACB ( 1.84 %) PRKCB ( 1.23 %) RPS6KA6 ( 1.23 %) RAF1 ( 0.61 %) RPS6KA1 ( 0.61 %) HRAS ( 0.61 %) PRKX ( 0.61 %) ARAF ( 0.61 %) PRKACA ( 0.61 %)	0.0301593	0.059409	0.0877765	0.115288	0.0301593	0.57576	0.600964	0.770057	0.490189	0.457989	0.263786	0.0877765	0.687668	0.0877765	0.667941	0.588555	0.217286	0.167848	0.0877765	0.141971	0.505564	0.059409	0.0877765	0.115288	0.217286	0.240892	0.405835	0.240892	0.285989	0.141971	0.141971	0.0877765	0.217286	0.141971	0.141971	0.217286	0.059409	0.505564	0.263786
MELANOGENESIS	145	101	635468	26.4742	79	0.474804	7.02e-15	1.83e-12	89.8734	KRAS (36.81 %) GNAS ( 4.29 %) PRKCG ( 2.45 %) NRAS ( 1.84 %) PRKACB ( 1.84 %) PRKCB ( 1.23 %) GSK3B ( 1.23 %) CTNNB1 ( 1.23 %) PRKX ( 0.61 %) PRKACA ( 0.61 %) RAF1 ( 0.61 %) KIT ( 0.61 %) HRAS ( 0.61 %)	0.0320302	0.0630345	0.0930458	0.122096	0.0320302	0.598089	0.623423	0.790412	0.511393	0.478522	0.277866	0.0930458	0.709766	0.0930458	0.690241	0.610962	0.229284	0.177434	0.0930458	0.150215	0.527044	0.0630345	0.0930458	0.122096	0.229284	0.25397	0.425023	0.25397	0.300996	0.150215	0.150215	0.0930458	0.229284	0.150215	0.150215	0.229284	0.0630345	0.527044	0.277866
NEUROTROPHIN SIGNALING PATHWAY	137	126	851020	65.5461	116	0.247911	8.03e-15	2.03e-12	54.3103	TP53 (39.26 %) KRAS (36.81 %) NTRK1 ( 4.29 %) NTRK3 ( 4.29 %) NTRK2 ( 3.68 %) PIK3CG ( 3.07 %) BRAF ( 1.84 %) MAP3K3 ( 1.84 %) NRAS ( 1.84 %) PTPN11 ( 1.84 %) IRAK2 ( 1.84 %) IRS1 ( 1.84 %) RPS6KA6 ( 1.23 %) ABL1 ( 1.23 %) AKT1 ( 1.23 %) FOXO3 ( 1.23 %) PLCG2 ( 1.23 %) MAP2K5 ( 1.23 %) GSK3B ( 1.23 %) IRAK1 ( 1.23 %) PIK3CD ( 1.23 %) PIK3R2 ( 1.23 %) PDK1 ( 0.61 %) TP73 ( 0.61 %) IKBKB ( 0.61 %) …	0.109707	0.207378	0.294335	0.371751	0.109707	0.96137	0.969381	0.996219	0.922424	0.902128	0.687155	0.294335	0.987915	0.294335	0.984753	0.965608	0.605303	0.502036	0.294335	0.440674	0.930935	0.207378	0.294335	0.371751	0.605303	0.648604	0.861305	0.648604	0.721476	0.440674	0.440674	0.294335	0.605303	0.440674	0.440674	0.605303	0.207378	0.930935	0.687155
VEGF SIGNALING PATHWAY	112	76	452140	36.3668	79	0.336921	9.82e-15	2.41e-12	79.7468	KRAS (36.81 %) KDR ( 4.91 %) PIK3CG ( 3.07 %) PRKCG ( 2.45 %) NRAS ( 1.84 %) PRKCB ( 1.23 %) PTK2 ( 1.23 %) AKT1 ( 1.23 %) PIK3CD ( 1.23 %) PLCG2 ( 1.23 %) PIK3R2 ( 1.23 %) RAF1 ( 0.61 %) AKT3 ( 0.61 %) HRAS ( 0.61 %) SRC ( 0.61 %) PIK3CA ( 0.61 %) PLCG1 ( 0.61 %)	0.0475672	0.0928717	0.136021	0.177118	0.0475672	0.744517	0.768244	0.903606	0.65774	0.6227	0.385752	0.136021	0.84307	0.136021	0.827004	0.75667	0.322866	0.253541	0.136021	0.21626	0.674021	0.0928717	0.136021	0.177118	0.322866	0.355075	0.563299	0.355075	0.41497	0.21626	0.21626	0.136021	0.322866	0.21626	0.21626	0.322866	0.0928717	0.674021	0.385752
CELL CYCLE	93	124	734945	48.7028	90	0.266689	1.8e-14	4.28e-12	64.4444	TP53 (39.26 %) ATM ( 7.98 %) CDKN2A ( 5.52 %) RB1 ( 4.29 %) PRKDC ( 4.29 %) RBL1 ( 2.45 %) TFDP1 ( 2.45 %) MDM2 ( 1.23 %) ABL1 ( 1.23 %) RBL2 ( 1.23 %) MYC ( 1.23 %) CDC25A ( 1.23 %) SMAD4 ( 1.23 %) GSK3B ( 1.23 %) ATR ( 0.61 %) BUB1 ( 0.61 %) CHEK1 ( 0.61 %) CCNE1 ( 0.61 %) SMAD2 ( 0.61 %) CDKN2B ( 0.61 %) CDKN2C ( 0.61 %) CDK7 ( 0.61 %) CCNB3 ( 0.61 %)	0.0704799	0.135992	0.196888	0.253491	0.0704799	0.870805	0.888374	0.970048	0.799694	0.768167	0.518509	0.196888	0.937794	0.196888	0.928003	0.879911	0.442724	0.35501	0.196888	0.306105	0.813812	0.135992	0.196888	0.253491	0.442724	0.482001	0.711331	0.482001	0.552445	0.306105	0.306105	0.196888	0.442724	0.306105	0.306105	0.442724	0.135992	0.813812	0.518509
NATURAL KILLER CELL MEDIATED CYTOTOXICITY	128	137	829214	41.6433	82	0.294269	2.2e-14	5.1e-12	78.0488	KRAS (36.81 %) PIK3CG ( 3.07 %) PRKCG ( 2.45 %) BRAF ( 1.84 %) NRAS ( 1.84 %) PTPN11 ( 1.84 %) FYN ( 1.84 %) VAV1 ( 1.23 %) VAV2 ( 1.23 %) PLCG2 ( 1.23 %) PRKCB ( 1.23 %) PIK3CD ( 1.23 %) VAV3 ( 1.23 %) PIK3R2 ( 1.23 %) ZAP70 ( 0.61 %) SHC3 ( 0.61 %) PLCG1 ( 0.61 %) LCK ( 0.61 %) RAF1 ( 0.61 %) SHC1 ( 0.61 %) HRAS ( 0.61 %) SYK ( 0.61 %) ARAF ( 0.61 %) PIK3CA ( 0.61 %)	0.0568458	0.11046	0.161027	0.208719	0.0568458	0.80577	0.827225	0.939748	0.724057	0.689791	0.443036	0.161027	0.891821	0.161027	0.878388	0.816812	0.373874	0.296124	0.161027	0.2537	0.739743	0.11046	0.161027	0.208719	0.373874	0.409467	0.630252	0.409467	0.474697	0.2537	0.2537	0.161027	0.373874	0.2537	0.2537	0.373874	0.11046	0.739743	0.443036
AXON GUIDANCE	111	129	959379	51.214	90	0.244853	6.26e-13	1.39e-10	63.3333	KRAS (36.81 %) EPHA3 ( 6.13 %) EPHA5 ( 4.29 %) EPHA7 ( 3.68 %) ROBO2 ( 3.07 %) PAK3 ( 3.07 %) EPHB6 ( 3.07 %) ROBO1 ( 2.45 %) PAK7 ( 2.45 %) EPHB1 ( 2.45 %) PAK4 ( 1.84 %) NRAS ( 1.84 %) MET ( 1.84 %) FYN ( 1.84 %) PTK2 ( 1.23 %) ABL1 ( 1.23 %) PAK6 ( 1.23 %) EPHB4 ( 1.23 %) SEMA3B ( 1.23 %) GSK3B ( 1.23 %) FES ( 1.23 %) ROCK1 ( 0.61 %) SEMA3F ( 0.61 %) HRAS ( 0.61 %) EPHA1 ( 0.61 %) EPHA2 ( 0.61…	0.0756961	0.145662	0.210332	0.270107	0.0756961	0.889639	0.905715	0.977138	0.823019	0.792845	0.544857	0.210332	0.94977	0.210332	0.941206	0.897993	0.467256	0.376425	0.210332	0.325357	0.836416	0.145662	0.210332	0.270107	0.467256	0.507583	0.737668	0.507583	0.579309	0.325357	0.325357	0.210332	0.467256	0.325357	0.325357	0.467256	0.145662	0.836416	0.544857
WNT SIGNALING PATHWAY	106	150	965257	38.7483	76	0.292561	6.33e-13	1.39e-10	73.6842	TP53 (39.26 %) APC ( 6.75 %) PRKCG ( 2.45 %) PRKACB ( 1.84 %) MYC ( 1.23 %) PRKCB ( 1.23 %) SMAD4 ( 1.23 %) GSK3B ( 1.23 %) CTNNB1 ( 1.23 %) ROCK1 ( 0.61 %) PRKX ( 0.61 %) NLK ( 0.61 %) PRKACA ( 0.61 %) SMAD2 ( 0.61 %) MAPK8 ( 0.61 %)	0.0516637	0.100658	0.147122	0.191185	0.0516637	0.773564	0.796356	0.921622	0.688705	0.653864	0.411667	0.147122	0.86678	0.147122	0.851869	0.785262	0.345818	0.272599	0.147122	0.232971	0.704788	0.100658	0.147122	0.191185	0.345818	0.379615	0.594155	0.379615	0.442062	0.232971	0.232971	0.147122	0.345818	0.232971	0.232971	0.345818	0.100658	0.704788	0.411667
FC EPSILON RI SIGNALING PATHWAY	131	79	466624	44.9171	81	0.256073	8.75e-12	1.87e-09	82.716	KRAS (36.81 %) PIK3CG ( 3.07 %) PRKCE ( 1.84 %) NRAS ( 1.84 %) FYN ( 1.84 %) PRKCB ( 1.23 %) VAV1 ( 1.23 %) AKT1 ( 1.23 %) VAV2 ( 1.23 %) PIK3CD ( 1.23 %) PLCG2 ( 1.23 %) VAV3 ( 1.23 %) PIK3R2 ( 1.23 %) RAF1 ( 0.61 %) PDK1 ( 0.61 %) PRKCD ( 0.61 %) MAP2K6 ( 0.61 %) AKT3 ( 0.61 %) HRAS ( 0.61 %) MAPK8 ( 0.61 %) SYK ( 0.61 %) PIK3CA ( 0.61 %) PLCG1 ( 0.61 %)	0.0629865	0.122006	0.177308	0.229126	0.0629865	0.838236	0.857972	0.955965	0.760994	0.727782	0.478255	0.177308	0.9156	0.177308	0.903872	0.848425	0.405754	0.323177	0.177308	0.277681	0.776048	0.122006	0.177308	0.229126	0.405754	0.443183	0.669113	0.443183	0.511118	0.277681	0.277681	0.177308	0.405754	0.277681	0.277681	0.405754	0.122006	0.776048	0.478255
PROGESTERONE MEDIATED OOCYTE MATURATION	144	85	600500	39.835	74	0.268966	4e-11	8.3e-09	82.4324	KRAS (36.81 %) PIK3CG ( 3.07 %) BRAF ( 1.84 %) PRKACB ( 1.84 %) RPS6KA6 ( 1.23 %) IGF1R ( 1.23 %) AKT1 ( 1.23 %) PIK3CD ( 1.23 %) CDC25A ( 1.23 %) PIK3R2 ( 1.23 %) RAF1 ( 0.61 %) AKT3 ( 0.61 %) RPS6KA1 ( 0.61 %) MAPK8 ( 0.61 %) PRKX ( 0.61 %) ARAF ( 0.61 %) BUB1 ( 0.61 %) PRKACA ( 0.61 %) PIK3CA ( 0.61 %) CCNB3 ( 0.61 %)	0.0535825	0.104294	0.152288	0.19771	0.0535825	0.786047	0.808361	0.928883	0.702271	0.667604	0.423462	0.152288	0.876648	0.152288	0.862285	0.797511	0.356332	0.281384	0.152288	0.240699	0.718224	0.104294	0.152288	0.19771	0.356332	0.390821	0.607891	0.390821	0.454355	0.240699	0.240699	0.152288	0.356332	0.240699	0.240699	0.356332	0.104294	0.718224	0.423462
T CELL RECEPTOR SIGNALING PATHWAY	129	108	632894	50.8023	86	0.228615	5.22e-11	1.06e-08	74.4186	KRAS (36.81 %) PAK3 ( 3.07 %) PIK3CG ( 3.07 %) PAK7 ( 2.45 %) PAK4 ( 1.84 %) NRAS ( 1.84 %) TEC ( 1.84 %) ITK ( 1.84 %) FYN ( 1.84 %) VAV1 ( 1.23 %) AKT1 ( 1.23 %) VAV2 ( 1.23 %) PAK6 ( 1.23 %) GSK3B ( 1.23 %) CBLB ( 1.23 %) PIK3CD ( 1.23 %) FOS ( 1.23 %) VAV3 ( 1.23 %) PIK3R2 ( 1.23 %) ZAP70 ( 0.61 %) PDK1 ( 0.61 %) IKBKB ( 0.61 %) AKT3 ( 0.61 %) RELA ( 0.61 %) PLCG1 ( 0.61 %) LCK ( 0.61 %) RAF1…	0.0748269	0.144055	0.208102	0.267358	0.0748269	0.886696	0.903018	0.976083	0.819322	0.788914	0.540559	0.208102	0.947944	0.208102	0.939183	0.895175	0.463235	0.372898	0.208102	0.322179	0.832841	0.144055	0.208102	0.267358	0.463235	0.5034	0.733442	0.5034	0.574937	0.322179	0.322179	0.208102	0.463235	0.322179	0.322179	0.463235	0.144055	0.832841	0.540559
INSULIN SIGNALING PATHWAY	142	137	900757	56.0867	87	0.19066	9.28e-09	1.83e-06	78.1609	KRAS (36.81 %) PIK3CG ( 3.07 %) BRAF ( 1.84 %) NRAS ( 1.84 %) PRKACB ( 1.84 %) TSC2 ( 1.84 %) INSR ( 1.84 %) IRS1 ( 1.84 %) AKT1 ( 1.23 %) MKNK1 ( 1.23 %) RPTOR ( 1.23 %) TSC1 ( 1.23 %) GSK3B ( 1.23 %) CBLB ( 1.23 %) MKNK2 ( 1.23 %) PIK3CD ( 1.23 %) PIK3R2 ( 1.23 %) GCK ( 0.61 %) IKBKB ( 0.61 %) AKT3 ( 0.61 %) SHC3 ( 0.61 %) PRKX ( 0.61 %) PRKACA ( 0.61 %) PRKAR1A ( 0.61 %) RAF1 ( 0.61 %) SHC1 ( …	0.0864129	0.165359	0.237482	0.303374	0.0864129	0.920384	0.933549	0.986938	0.86307	0.835941	0.594958	0.237482	0.967752	0.237482	0.961363	0.927264	0.514712	0.418567	0.237482	0.363571	0.874902	0.165359	0.237482	0.303374	0.514712	0.556647	0.784846	0.556647	0.629959	0.363571	0.363571	0.237482	0.514712	0.363571	0.363571	0.514712	0.165359	0.874902	0.594958
CHEMOKINE SIGNALING PATHWAY	90	190	977131	58.72	86	0.165712	3.77e-07	7.28e-05	72.093	KRAS (36.81 %) JAK2 ( 3.07 %) PIK3CG ( 3.07 %) BRAF ( 1.84 %) JAK3 ( 1.84 %) NRAS ( 1.84 %) PRKACB ( 1.84 %) HCK ( 1.84 %) ITK ( 1.84 %) PTK2 ( 1.23 %) VAV1 ( 1.23 %) AKT1 ( 1.23 %) GRK7 ( 1.23 %) VAV2 ( 1.23 %) STAT5B ( 1.23 %) FOXO3 ( 1.23 %) PRKCB ( 1.23 %) GSK3B ( 1.23 %) PIK3CD ( 1.23 %) VAV3 ( 1.23 %) PIK3R2 ( 1.23 %) STAT3 ( 0.61 %) STAT2 ( 0.61 %) ADRBK2 ( 0.61 %) ROCK1 ( 0.61 %) IKBKB ( …	0.0925521	0.176538	0.252751	0.321911	0.0925521	0.934081	0.945719	0.99055	0.881947	0.856638	0.621368	0.252751	0.975041	0.252751	0.96969	0.940182	0.540195	0.441619	0.252751	0.384669	0.892873	0.176538	0.252751	0.321911	0.540195	0.582751	0.808147	0.582751	0.656411	0.384669	0.384669	0.252751	0.540195	0.384669	0.384669	0.540195	0.176538	0.892873	0.621368
ENDOCYTOSIS	100	181	1262864	43.8831	68	0.190211	2.66e-06	0.000501666	70.5882	EGFR (18.40 %) ERBB4 ( 4.91 %) KDR ( 4.91 %) FGFR4 ( 4.29 %) NTRK1 ( 4.29 %) PDGFRA ( 3.68 %) FLT1 ( 2.45 %) MET ( 1.84 %) ERBB3 ( 1.84 %) FGFR2 ( 1.84 %) RET ( 1.84 %) IGF1R ( 1.23 %) MDM2 ( 1.23 %) GRK7 ( 1.23 %) CSF1R ( 1.23 %) CBLB ( 1.23 %) ADRBK2 ( 0.61 %) PRKCI ( 0.61 %) KIT ( 0.61 %) HRAS ( 0.61 %) SRC ( 0.61 %)	0.061014	0.118305	0.172101	0.222615	0.061014	0.828425	0.848723	0.951288	0.749677	0.716089	0.467167	0.172101	0.908579	0.172101	0.896312	0.838893	0.395672	0.314583	0.172101	0.270046	0.764951	0.118305	0.172101	0.222615	0.395672	0.432544	0.657071	0.432544	0.499677	0.270046	0.270046	0.172101	0.395672	0.270046	0.270046	0.395672	0.118305	0.764951	0.467167
ADIPOCYTOKINE SIGNALING PATHWAY	146	67	457904	26.9244	47	0.241953	1.11e-05	0.00204738	89.3617	STK11 (20.86 %) JAK2 ( 3.07 %) PTPN11 ( 1.84 %) IRS1 ( 1.84 %) AKT1 ( 1.23 %) STAT3 ( 0.61 %) PRKCQ ( 0.61 %) IKBKB ( 0.61 %) AKT3 ( 0.61 %) MAPK8 ( 0.61 %) RELA ( 0.61 %)	0.0326886	0.0643087	0.0948952	0.124482	0.0326886	0.605673	0.631032	0.797147	0.518653	0.485571	0.282763	0.0948952	0.717174	0.0948952	0.697736	0.618563	0.233468	0.180785	0.0948952	0.153101	0.534388	0.0643087	0.0948952	0.124482	0.233468	0.258525	0.431636	0.258525	0.306208	0.153101	0.153101	0.0948952	0.233468	0.153101	0.153101	0.233468	0.0643087	0.534388	0.282763
CYTOKINE CYTOKINE RECEPTOR INTERACTION	89	266	959391	38.3425	60	0.194471	1.32e-05	0.00237054	73.3333	EGFR (18.40 %) KDR ( 4.91 %) PDGFRA ( 3.68 %) INHBA ( 3.07 %) FLT1 ( 2.45 %) FLT4 ( 2.45 %) MET ( 1.84 %) PDGFRB ( 1.84 %) CSF1R ( 1.23 %) VEGFC ( 1.23 %) ACVRL1 ( 1.23 %) ACVR1B ( 1.23 %) BMPR1B ( 1.23 %) TGFBR2 ( 0.61 %) TGFBR1 ( 0.61 %) KIT ( 0.61 %) ACVR2B ( 0.61 %) BMPR1A ( 0.61 %)	0.0509552	0.099314	0.145209	0.188765	0.0509552	0.768779	0.791742	0.918761	0.683548	0.648655	0.407256	0.145209	0.862945	0.145209	0.847833	0.780561	0.341897	0.269332	0.145209	0.230101	0.699673	0.099314	0.145209	0.188765	0.341897	0.375431	0.588969	0.375431	0.437459	0.230101	0.230101	0.145209	0.341897	0.230101	0.230101	0.341897	0.099314	0.699673	0.407256
CALCIUM SIGNALING PATHWAY	88	177	1183919	38.3773	58	0.179354	6.84e-05	0.0120448	67.2414	EGFR (18.40 %) ERBB4 ( 4.91 %) GNAS ( 4.29 %) PDGFRA ( 3.68 %) PRKCG ( 2.45 %) PDGFRB ( 1.84 %) PRKACB ( 1.84 %) ERBB2 ( 1.84 %) ERBB3 ( 1.84 %) PLCG2 ( 1.23 %) PRKCB ( 1.23 %) CYSLTR2 ( 1.23 %) PRKX ( 0.61 %) PRKACA ( 0.61 %) PLCG1 ( 0.61 %) P2RX6 ( 0.61 %)	0.0510158	0.099429	0.145372	0.188972	0.0510158	0.769192	0.792141	0.91901	0.683992	0.649103	0.407634	0.145372	0.863277	0.145372	0.848182	0.780966	0.342233	0.269612	0.145372	0.230347	0.700114	0.099429	0.145372	0.188972	0.342233	0.37579	0.589415	0.37579	0.437854	0.230347	0.230347	0.145372	0.342233	0.230347	0.230347	0.342233	0.099429	0.700114	0.407634
MTOR SIGNALING PATHWAY	102	52	380351	32.4413	49	0.179098	0.000397911	0.0685761	75.5102	STK11 (20.86 %) PIK3CG ( 3.07 %) TSC2 ( 1.84 %) BRAF ( 1.84 %) RPS6KA6 ( 1.23 %) RPTOR ( 1.23 %) AKT1 ( 1.23 %) TSC1 ( 1.23 %) VEGFC ( 1.23 %) PIK3CD ( 1.23 %) PIK3R2 ( 1.23 %) AKT3 ( 0.61 %) RPS6KA1 ( 0.61 %) PIK3CA ( 0.61 %)	0.0411261	0.0805608	0.118374	0.154632	0.0411261	0.691452	0.716309	0.866785	0.603034	0.568252	0.342925	0.118374	0.797261	0.118374	0.779497	0.704142	0.285352	0.222735	0.118374	0.189398	0.61936	0.0805608	0.118374	0.154632	0.285352	0.314743	0.510283	0.314743	0.369948	0.189398	0.189398	0.118374	0.285352	0.189398	0.189398	0.285352	0.0805608	0.61936	0.342925
EPITHELIAL CELL SIGNALING IN HELICOBACTER PYLORI INFECTION	159	68	400130	25.0232	40	0.203716	0.000566432	0.0955854	82.5	EGFR (18.40 %) PTPN11 ( 1.84 %) MET ( 1.84 %) PLCG2 ( 1.23 %) IKBKB ( 0.61 %) MAPK8 ( 0.61 %) RELA ( 0.61 %) SRC ( 0.61 %) PLCG1 ( 0.61 %)	0.0299375	0.0589787	0.0871505	0.114479	0.0299375	0.573035	0.598217	0.767519	0.487618	0.455504	0.2621	0.0871505	0.684943	0.0871505	0.665196	0.585817	0.215852	0.166706	0.0871505	0.140989	0.502957	0.0589787	0.0871505	0.114479	0.215852	0.239328	0.403521	0.239328	0.284191	0.140989	0.140989	0.0871505	0.215852	0.140989	0.140989	0.215852	0.0589787	0.502957	0.2621
FOCAL ADHESION	113	199	1596629	65.5597	77	0.0698541	0.0211711	3.49971	62.3377	EGFR (18.40 %) KDR ( 4.91 %) PDGFRA ( 3.68 %) PAK3 ( 3.07 %) PIK3CG ( 3.07 %) FLT1 ( 2.45 %) FLT4 ( 2.45 %) PTEN ( 2.45 %) PAK7 ( 2.45 %) PRKCG ( 2.45 %) MET ( 1.84 %) PAK4 ( 1.84 %) PDGFRB ( 1.84 %) BRAF ( 1.84 %) ERBB2 ( 1.84 %) FYN ( 1.84 %) IGF1R ( 1.23 %) PTK2 ( 1.23 %) AKT1 ( 1.23 %) PAK6 ( 1.23 %) CTNNB1 ( 1.23 %) VAV3 ( 1.23 %) VAV1 ( 1.23 %) VAV2 ( 1.23 %) VEGFC ( 1.23 %) PRKCB ( 1.23 %)…	0.109743	0.207443	0.29442	0.371853	0.109743	0.961414	0.969418	0.996227	0.922493	0.902207	0.687281	0.29442	0.987933	0.29442	0.984775	0.965648	0.605431	0.502157	0.29442	0.440787	0.930999	0.207443	0.29442	0.371853	0.605431	0.648732	0.861401	0.648732	0.7216	0.440787	0.440787	0.29442	0.605431	0.440787	0.440787	0.605431	0.207443	0.930999	0.687281
ADHERENS JUNCTION	116	73	602002	44.418	55	0.0928034	0.0233899	3.78917	83.6364	EGFR (18.40 %) ERBB2 ( 1.84 %) FGFR1 ( 1.84 %) INSR ( 1.84 %) MET ( 1.84 %) FYN ( 1.84 %) IGF1R ( 1.23 %) SMAD4 ( 1.23 %) CTNNB1 ( 1.23 %) YES1 ( 1.23 %) SMAD2 ( 0.61 %) TGFBR2 ( 0.61 %) TGFBR1 ( 0.61 %) SRC ( 0.61 %) NLK ( 0.61 %) FER ( 0.61 %)	0.0620306	0.120213	0.174787	0.225975	0.0620306	0.83355	0.85356	0.953756	0.755572	0.722174	0.472908	0.174787	0.912266	0.174787	0.900278	0.843875	0.400886	0.319024	0.174787	0.273989	0.770734	0.120213	0.174787	0.225975	0.400886	0.438049	0.663328	0.438049	0.505603	0.273989	0.273989	0.174787	0.400886	0.273989	0.273989	0.400886	0.120213	0.770734	0.472908
[truncated: 124 more columns]
