# Supplementary material for: Pathway-based dissection of the genomic heterogeneity of cancer hallmarks’ acquisition with SLAPenrich
Source: Sci Rep. 2018 Apr 30;8:6713. doi: 10.1038/s41598-018-25076-6 (PMC5928049; doi:10.1038/s41598-018-25076-6)
Supplement: Supplementary file 4 — Supplementary Table 2 [file 41598_2018_25076_MOESM4_ESM.xlsx]

## Sheet: Supplementary Table S2
	SLAPenrich		PATHscan
Pathway	pval	% FDR	pval	% FDR
DORSO VENTRAL AXIS FORMATION	2.75e-15	1.74e-12	1.8e-23	1e-22
SMALL CELL LUNG CANCER	2.95e-15	1.74e-12
ALDOSTERONE REGULATED SODIUM REABSORPTION	3.19e-15	1.74e-12
HUNTINGTONS DISEASE	3.28e-15	1.74e-12
REGULATION OF ACTIN CYTOSKELETON	3.43e-15	1.74e-12	9.6e-29	6.5e-28
AMYOTROPHIC LATERAL SCLEROSIS ALS	4.05e-15	1.74e-12
TIGHT JUNCTION	4.31e-15	1.74e-12	4.8e-24	3e-23
P53 SIGNALING PATHWAY	4.47e-15	1.74e-12	4.9e-22	2.2e-21
B CELL RECEPTOR SIGNALING PATHWAY	4.79e-15	1.74e-12	7.8e-13	2.7e-12
BASAL CELL CARCINOMA	5.29e-15	1.74e-12
GAP JUNCTION	5.33e-15	1.74e-12	4e-34	3.5e-38
LONG TERM DEPRESSION	5.56e-15	1.74e-12
GNRH SIGNALING PATHWAY	5.73e-15	1.74e-12	1.5e-22	6.9e-22
ERBB SIGNALING PATHWAY	5.83e-15	1.74e-12	4.8e-19	1.9e-18
APOPTOSIS	6.01e-15	1.74e-12	3.2e-23	1.7e-22
LONG TERM POTENTIATION	6.67e-15	1.8e-12
MELANOGENESIS	7.02e-15	1.83e-12							SLAPenrich
NEUROTROPHIN SIGNALING PATHWAY	8.03e-15	2.03e-12	0.15	0.288					< 5% FDR	Others
VEGF SIGNALING PATHWAY	9.82e-15	2.41e-12	1.6e-16	6.1e-16			PATHscan	< 5% FDR	26	5	31
CELL CYCLE	1.8e-14	4.28e-12	4.7e-17	1.8e-16				Others	10	88	98
NATURAL KILLER CELL MEDIATED CYTOTOXICITY	2.2e-14	5.1e-12	2.8e-13	9.8e-13					36	93	129
AXON GUIDANCE	6.26e-13	1.39e-10	2.1e-23	1.1e-22
WNT SIGNALING PATHWAY	6.33e-13	1.39e-10	3.9e-22	1.8e-21					Fisher p = 2.10e-14
FC EPSILON RI SIGNALING PATHWAY	8.75e-12	1.87e-09	1.8e-10	5.6e-10
PROGESTERONE MEDIATED OOCYTE MATURATION	4e-11	8.3e-09	2.1e-10	6.1e-10
T CELL RECEPTOR SIGNALING PATHWAY	5.22e-11	1.06e-08	9.4e-12	3.1e-11
INSULIN SIGNALING PATHWAY	9.28e-09	1.83e-06	2.7e-10	7.7e-10
CHEMOKINE SIGNALING PATHWAY	3.77e-07	7.28e-05
ENDOCYTOSIS	2.66e-06	0.000501666
ADIPOCYTOKINE SIGNALING PATHWAY	1.11e-05	0.00204738	4.4e-09	1.2e-08
CYTOKINE CYTOKINE RECEPTOR INTERACTION	1.32e-05	0.00237054	6e-10	1.7e-09
CALCIUM SIGNALING PATHWAY	6.84e-05	0.0120448	9e-14	3.2e-13
MTOR SIGNALING PATHWAY	0.000397911	0.0685761	4.8e-05	0.00012
EPITHELIAL CELL SIGNALING IN HELICOBACTER PYLORI INFECTION	0.000566432	0.0955854	0.0017	0.0043
FOCAL ADHESION	0.0211711	3.49971	2e-09	5.5e-09
ADHERENS JUNCTION	0.0233899	3.78917	2.6e-06	6.7e-06
MAPK signaling			6.4e-44	6.9e-43
Taste transduction			0.01	0.025
Phosphatidyl. sig.			0.081	0.171
Inositol phos. metab.			0.082	0.171
Hedgehog signaling			0.144	0.282
