# Supplementary material for: Pathway-based dissection of the genomic heterogeneity of cancer hallmarks’ acquisition with SLAPenrich
Source: Sci Rep. 2018 Apr 30;8:6713. doi: 10.1038/s41598-018-25076-6 (PMC5928049; doi:10.1038/s41598-018-25076-6)
Supplement: Supplementary file 5 — Supplementary Table 3 [file 41598_2018_25076_MOESM5_ESM.xlsx]

## Sheet: SLAPenrich
Pathway	n.genes.in.rep	total Exonic Content Block length	(E)xpected n.mut in path	(O)bserved n.mut in path	log10 (oddRatio=(O/E))	pval	% FDR	ExclusiveCoverage	Mutated Genes	prob 16770	prob 16646	prob 17741	prob 16915	prob 17769	prob 16678	prob 16835	prob 17210	prob 16628	prob 16632	prob 16949	prob 17216	prob 16668	prob 16947	prob 16660	prob 16686	prob 16929	prob 16626	prob 16748	prob 16861	prob 17290	prob 17778	prob 17184	prob 17316	prob 17308	prob 16909	prob 17218	prob 16648	prob 16879	prob 17280	prob 17760	prob 17302	prob 17330	prob 17186	prob 16875	prob 17733	prob 17754	prob 17759	prob 17763	prob 16951
PATHWAYS IN CANCER	328	2147322	86.8643	141	0.210378	2.38292e-16	7.46508e-12	40.4255	TP53 (39.26 %) KRAS (36.81 %) EGFR (18.40 %) APC ( 6.75 %) CDKN2A ( 5.52 %) RB1 ( 4.29 %) NTRK1 ( 4.29 %) PDGFRA ( 3.68 %) PTCH1 ( 3.07 %) PIK3CG ( 3.07 %) MSH6 ( 2.45 %) PTEN ( 2.45 %) PRKCG ( 2.45 %) NRAS ( 1.84 %) MET ( 1.84 %) FGFR2 ( 1.84 %) FGFR1 ( 1.84 %) PDGFRB ( 1.84 %) BRAF ( 1.84 %) ERBB2 ( 1.84 %) RET ( 1.84 %) JUP ( 1.23 %) IGF1R ( 1.23 %) PTK2 ( 1.23 %) ABL1 ( 1.23 %) JAK1 ( 1.23 %)…	0.17755	0.323576	0.443675	0.54245	0.17755	0.995802	0.99716	0.999916	0.986435	0.979946	0.858389	0.443675	0.999405	0.443675	0.999121	0.996547	0.790648	0.690502	0.443675	0.623688	0.988844	0.323576	0.443675	0.54245	0.790648	0.827819	0.963954	0.827819	0.883532	0.623688	0.623688	0.443675	0.790648	0.623688	0.623688	0.790648	0.323576	0.988844	0.858389	0.935206
MELANOMA	71	454763	44.9649	130	0.46107	5.06414e-16	7.46508e-12	54.6154	TP53 (39.26 %) KRAS (36.81 %) EGFR (18.40 %) CDKN2A ( 5.52 %) RB1 ( 4.29 %) PDGFRA ( 3.68 %) PIK3CG ( 3.07 %) PTEN ( 2.45 %) PDGFRB ( 1.84 %) BRAF ( 1.84 %) FGFR1 ( 1.84 %) NRAS ( 1.84 %) MET ( 1.84 %) IGF1R ( 1.23 %) MDM2 ( 1.23 %) AKT1 ( 1.23 %) PIK3CD ( 1.23 %) PIK3R2 ( 1.23 %) RAF1 ( 0.61 %) AKT3 ( 0.61 %) HRAS ( 0.61 %) ARAF ( 0.61 %) PIK3CA ( 0.61 %)	0.0630785	0.122178	0.17755	0.229429	0.0630785	0.83868	0.858389	0.956172	0.76151	0.728316	0.478767	0.17755	0.915914	0.17755	0.904211	0.848855	0.40622	0.323576	0.17755	0.278035	0.776554	0.122178	0.17755	0.229429	0.40622	0.443675	0.669665	0.443675	0.511646	0.278035	0.278035	0.17755	0.40622	0.278035	0.278035	0.40622	0.122178	0.776554	0.478767	0.598353
NON SMALL CELL LUNG CANCER	54	397477	43.5689	127	0.464628	5.55679e-16	7.46508e-12	55.1181	TP53 (39.26 %) KRAS (36.81 %) EGFR (18.40 %) CDKN2A ( 5.52 %) RB1 ( 4.29 %) PIK3CG ( 3.07 %) PRKCG ( 2.45 %) ERBB2 ( 1.84 %) BRAF ( 1.84 %) NRAS ( 1.84 %) PRKCB ( 1.23 %) AKT1 ( 1.23 %) FOXO3 ( 1.23 %) PIK3CD ( 1.23 %) PLCG2 ( 1.23 %) PIK3R2 ( 1.23 %) RAF1 ( 0.61 %) AKT3 ( 0.61 %) HRAS ( 0.61 %) ARAF ( 0.61 %) PIK3CA ( 0.61 %) PLCG1 ( 0.61 %)	0.0604206	0.117191	0.17053	0.220647	0.0604206	0.825362	0.845828	0.949788	0.746174	0.712479	0.46379	0.17053	0.906358	0.17053	0.893927	0.835914	0.39261	0.31198	0.17053	0.267736	0.76151	0.117191	0.17053	0.220647	0.39261	0.429309	0.653367	0.429309	0.496188	0.267736	0.267736	0.17053	0.39261	0.267736	0.267736	0.39261	0.117191	0.76151	0.46379	0.582103
SIGNALING BY EGFR IN CANCER	109	780126	43.5689	105	0.382013	1.34199e-15	7.46508e-12	77.1429	KRAS (36.81 %) EGFR (18.40 %) PRKCG ( 2.45 %) PTEN ( 2.45 %) NRAS ( 1.84 %) PRKACB ( 1.84 %) PRKCE ( 1.84 %) TSC2 ( 1.84 %) AKT1 ( 1.23 %) FOXO3 ( 1.23 %) MDM2 ( 1.23 %) AKT3 ( 0.61 %) GSK3A ( 0.61 %) HRAS ( 0.61 %) PIK3CA ( 0.61 %) PLCG1 ( 0.61 %) PRKACA ( 0.61 %) PRKAR1A ( 0.61 %) PRKCD ( 0.61 %) RAF1 ( 0.61 %) SHC1 ( 0.61 %) SRC ( 0.61 %)	0.0604206	0.117191	0.17053	0.220647	0.0604206	0.825362	0.845828	0.949788	0.746174	0.712479	0.46379	0.17053	0.906358	0.17053	0.893927	0.835914	0.39261	0.31198	0.17053	0.267736	0.76151	0.117191	0.17053	0.220647	0.39261	0.429309	0.653367	0.429309	0.496188	0.267736	0.267736	0.17053	0.39261	0.267736	0.267736	0.39261	0.117191	0.76151	0.46379	0.582103
TEL PATHWAY	18	148575	19.5303	123	0.799195	1.93569e-15	7.46508e-12	60.9756	TP53 (39.3 %) KRAS (36.8 %) EGFR (18.4 %) RB1 ( 4.3 %) TERT ( 3.1 %) AKT1 ( 1.2 %) IGF1R ( 1.2 %) MYC ( 1.2 %)	0.022408	0.0443139	0.0657289	0.0866641	0.022408	0.469832	0.493326	0.663049	0.39261	0.364446	0.202783	0.0657289	0.577341	0.0657289	0.557743	0.481712	0.165818	0.127138	0.0657289	0.10713	0.40622	0.0443139	0.0657289	0.0866641	0.165818	0.18451	0.319732	0.18451	0.220647	0.10713	0.10713	0.0657289	0.165818	0.10713	0.10713	0.165818	0.0443139	0.40622	0.202783	0.271873
MAPK SIGNALING PATHWAY	267	1712466	74.2555	132	0.249845	2.02345e-15	7.46508e-12	43.1818	TP53 (39.26 %) KRAS (36.81 %) EGFR (18.40 %) NF1 ( 7.98 %) FGFR4 ( 4.29 %) NTRK1 ( 4.29 %) PDGFRA ( 3.68 %) NTRK2 ( 3.68 %) PRKCG ( 2.45 %) MAP3K3 ( 1.84 %) MAP3K4 ( 1.84 %) NRAS ( 1.84 %) FGFR2 ( 1.84 %) MAP3K6 ( 1.84 %) FGFR1 ( 1.84 %) PDGFRB ( 1.84 %) BRAF ( 1.84 %) PRKACB ( 1.84 %) MAP4K1 ( 1.84 %) AKT1 ( 1.23 %) MYC ( 1.23 %) MAP3K2 ( 1.23 %) MAP2K5 ( 1.23 %) MAP3K12 ( 1.23 %) MKNK2 ( 1.23 %…	0.134524	0.250952	0.351717	0.438927	0.134524	0.982496	0.986889	0.999027	0.958351	0.944397	0.764197	0.351717	0.995873	0.351717	0.99449	0.984851	0.685197	0.579729	0.351717	0.514405	0.963954	0.250952	0.351717	0.438927	0.685197	0.727545	0.91423	0.727545	0.795918	0.514405	0.514405	0.351717	0.685197	0.514405	0.514405	0.685197	0.250952	0.963954	0.764197	0.867697
ENDOMETRIAL CANCER	52	376089	42.1384	129	0.485911	2.2236e-15	7.46508e-12	54.2636	TP53 (39.26 %) KRAS (36.81 %) EGFR (18.40 %) APC ( 6.75 %) PIK3CG ( 3.07 %) PTEN ( 2.45 %) ERBB2 ( 1.84 %) BRAF ( 1.84 %) NRAS ( 1.84 %) AKT1 ( 1.23 %) MYC ( 1.23 %) GSK3B ( 1.23 %) CTNNB1 ( 1.23 %) FOXO3 ( 1.23 %) PIK3CD ( 1.23 %) PIK3R2 ( 1.23 %) RAF1 ( 0.61 %) AKT3 ( 0.61 %) HRAS ( 0.61 %) ARAF ( 0.61 %) PIK3CA ( 0.61 %)	0.0577551	0.112175	0.163451	0.211766	0.0577551	0.810946	0.832153	0.942474	0.729851	0.695718	0.448383	0.163451	0.895715	0.163451	0.882538	0.821865	0.378687	0.300186	0.163451	0.257291	0.745454	0.112175	0.163451	0.211766	0.378687	0.414571	0.636266	0.414571	0.480241	0.257291	0.257291	0.163451	0.378687	0.257291	0.257291	0.378687	0.112175	0.745454	0.448383	0.565197
DORSO VENTRAL AXIS FORMATION	25	236446	17.3904	93	0.728175	2.49648e-15	7.46508e-12	88.172	KRAS (36.81 %) EGFR (18.40 %) NOTCH4 ( 1.84 %) NOTCH3 ( 1.23 %) NOTCH1 ( 1.23 %) NOTCH2 ( 0.61 %) ETS1 ( 0.61 %)	0.0196347	0.0388839	0.0577551	0.0762558	0.0196347	0.426066	0.448383	0.61397	0.353551	0.327397	0.179876	0.0577551	0.529303	0.0577551	0.51026	0.437335	0.146697	0.112175	0.0577551	0.0943933	0.366244	0.0388839	0.0577551	0.0762558	0.146697	0.163451	0.28617	0.163451	0.195979	0.0943933	0.0943933	0.0577551	0.146697	0.0943933	0.0943933	0.146697	0.0388839	0.366244	0.179876	0.242416
FAS SIGNALING PATHWAY	65	381310	17.3904	87	0.699211	2.49648e-15	7.46508e-12	79.3103	TP53 (39.26 %) EGFR (18.40 %) MET ( 1.84 %) ROCK1 ( 0.61 %) MAPK8 ( 0.61 %) BAX ( 0.61 %) RIPK1 ( 0.61 %)	0.0196347	0.0388839	0.0577551	0.0762558	0.0196347	0.426066	0.448383	0.61397	0.353551	0.327397	0.179876	0.0577551	0.529303	0.0577551	0.51026	0.437335	0.146697	0.112175	0.0577551	0.0943933	0.366244	0.0388839	0.0577551	0.0762558	0.146697	0.163451	0.28617	0.163451	0.195979	0.0943933	0.0943933	0.0577551	0.146697	0.0943933	0.0943933	0.146697	0.0388839	0.366244	0.179876	0.242416
SIGNALING BY CONSTITUTIVELY ACTIVE EGFR	18	117915	17.3904	94	0.732819	2.49648e-15	7.46508e-12	91.4894	KRAS (36.81 %) EGFR (18.40 %) NRAS ( 1.84 %) HRAS ( 0.61 %) PIK3CA ( 0.61 %) PLCG1 ( 0.61 %) SHC1 ( 0.61 %)	0.0196347	0.0388839	0.0577551	0.0762558	0.0196347	0.426066	0.448383	0.61397	0.353551	0.327397	0.179876	0.0577551	0.529303	0.0577551	0.51026	0.437335	0.146697	0.112175	0.0577551	0.0943933	0.366244	0.0388839	0.0577551	0.0762558	0.146697	0.163451	0.28617	0.163451	0.195979	0.0943933	0.0943933	0.0577551	0.146697	0.0943933	0.0943933	0.146697	0.0388839	0.366244	0.179876	0.242416
GRB2 EVENTS IN ERBB2 SIGNALING	22	146157	17.3904	100	0.759692	2.49648e-15	7.46508e-12	88	KRAS (36.81 %) EGFR (18.40 %) ERBB4 ( 4.91 %) ERBB2 ( 1.84 %) NRAS ( 1.84 %) HRAS ( 0.61 %) RAF1 ( 0.61 %)	0.0196347	0.0388839	0.0577551	0.0762558	0.0196347	0.426066	0.448383	0.61397	0.353551	0.327397	0.179876	0.0577551	0.529303	0.0577551	0.51026	0.437335	0.146697	0.112175	0.0577551	0.0943933	0.366244	0.0388839	0.0577551	0.0762558	0.146697	0.163451	0.28617	0.163451	0.195979	0.0943933	0.0943933	0.0577551	0.146697	0.0943933	0.0943933	0.146697	0.0388839	0.366244	0.179876	0.242416
BARD1 PATHWAY	29	196465	17.3904	80	0.662782	2.60529e-15	7.46508e-12	87.5	TP53 (39.26 %) ATM ( 7.98 %) PRKDC ( 4.29 %) BARD1 ( 1.23 %) BRCA1 ( 0.61 %) ATR ( 0.61 %) CCNE1 ( 0.61 %)	0.0196347	0.0388839	0.0577551	0.0762558	0.0196347	0.426066	0.448383	0.61397	0.353551	0.327397	0.179876	0.0577551	0.529303	0.0577551	0.51026	0.437335	0.146697	0.112175	0.0577551	0.0943933	0.366244	0.0388839	0.0577551	0.0762558	0.146697	0.163451	0.28617	0.163451	0.195979	0.0943933	0.0943933	0.0577551	0.146697	0.0943933	0.0943933	0.146697	0.0388839	0.366244	0.179876	0.242416
CELL CYCLE CHECKPOINTS	124	577201	17.3904	79	0.657319	2.69527e-15	7.46508e-12	89.8734	TP53 (39.26 %) ATM ( 7.98 %) MDM2 ( 1.23 %) CDC25A ( 1.23 %) CHEK1 ( 0.61 %) ATR ( 0.61 %) CCNE1 ( 0.61 %)	0.0196347	0.0388839	0.0577551	0.0762558	0.0196347	0.426066	0.448383	0.61397	0.353551	0.327397	0.179876	0.0577551	0.529303	0.0577551	0.51026	0.437335	0.146697	0.112175	0.0577551	0.0943933	0.366244	0.0388839	0.0577551	0.0762558	0.146697	0.163451	0.28617	0.163451	0.195979	0.0943933	0.0943933	0.0577551	0.146697	0.0943933	0.0943933	0.146697	0.0388839	0.366244	0.179876	0.242416
ERBB1 RECEPTOR PROXIMAL PATHWAY	35	265493	29.2474	96	0.516184	2.70128e-15	7.46508e-12	83.3333	KRAS (36.81 %) EGFR (18.40 %) NRAS ( 1.84 %) PTPN11 ( 1.84 %) PIK3R2 ( 1.23 %) PTK2 ( 1.23 %) PIK3CD ( 1.23 %) SRC ( 0.61 %) SHC1 ( 0.61 %) HRAS ( 0.61 %) STAT3 ( 0.61 %) PLCG1 ( 0.61 %) PIK3CA ( 0.61 %)	0.0361573	0.0710073	0.104597	0.136973	0.0361573	0.643407	0.668728	0.829276	0.55523	0.521234	0.308071	0.104597	0.753263	0.104597	0.734404	0.656301	0.255184	0.198254	0.104597	0.168177	0.571312	0.0710073	0.104597	0.136973	0.255184	0.282114	0.465307	0.282114	0.333089	0.168177	0.168177	0.104597	0.255184	0.168177	0.168177	0.255184	0.0710073	0.571312	0.308071	0.402846
SIGNALING BY GPCR	920	3086984	56.1966	113	0.303368	2.97545e-15	7.46508e-12	76.1062	KRAS (36.81 %) EGFR (18.40 %) GNAS ( 4.29 %) PIK3CG ( 3.07 %) PTCH1 ( 3.07 %) PRKCG ( 2.45 %) NRAS ( 1.84 %) PRKACB ( 1.84 %) PRKCE ( 1.84 %) TSHR ( 1.84 %) VAV3 ( 1.23 %) AKT1 ( 1.23 %) PIK3R2 ( 1.23 %) PRKCB ( 1.23 %) CYSLTR2 ( 1.23 %) VAV1 ( 1.23 %) PTCH2 ( 1.23 %) AKT3 ( 0.61 %) CDK5 ( 0.61 %) HRAS ( 0.61 %) RHOB ( 0.61 %) PIK3CA ( 0.61 %) PRKACA ( 0.61 %) PRKAR1A ( 0.61 %) PRKCD ( 0.61 %) PR…	0.0866641	0.165818	0.238111	0.30414	0.0866641	0.920995	0.934095	0.98711	0.863896	0.836841	0.596071	0.238111	0.968088	0.238111	0.961744	0.927842	0.515778	0.419525	0.238111	0.364446	0.875691	0.165818	0.238111	0.30414	0.515778	0.557743	0.78585	0.557743	0.631077	0.364446	0.364446	0.238111	0.515778	0.364446	0.364446	0.515778	0.165818	0.875691	0.596071	0.718922
THYROID CANCER	29	194680	21.5996	107	0.694937	3.02465e-15	7.46508e-12	66.3551	TP53 (39.26 %) KRAS (36.81 %) NTRK1 ( 4.29 %) BRAF ( 1.84 %) RET ( 1.84 %) NRAS ( 1.84 %) CTNNB1 ( 1.23 %) MYC ( 1.23 %) HRAS ( 0.61 %)	0.0251735	0.0497133	0.0736353	0.0969551	0.0251735	0.51026	0.534607	0.705888	0.429309	0.399453	0.225051	0.0736353	0.620476	0.0736353	0.600622	0.522589	0.18451	0.141848	0.0736353	0.119688	0.443675	0.0497133	0.0736353	0.0969551	0.18451	0.205039	0.351717	0.205039	0.244559	0.119688	0.119688	0.0736353	0.18451	0.119688	0.119688	0.18451	0.0497133	0.443675	0.225051	0.300186
RAS PATHWAY	30	235852	17.3904	76	0.640505	3.10407e-15	7.46508e-12	85.5263	KRAS (36.81 %) NF1 ( 7.98 %) NRAS ( 1.84 %) PRKCE ( 1.84 %) PRKCB ( 1.23 %) RIN1 ( 0.61 %) HRAS ( 0.61 %)	0.0196347	0.0388839	0.0577551	0.0762558	0.0196347	0.426066	0.448383	0.61397	0.353551	0.327397	0.179876	0.0577551	0.529303	0.0577551	0.51026	0.437335	0.146697	0.112175	0.0577551	0.0943933	0.366244	0.0388839	0.0577551	0.0762558	0.146697	0.163451	0.28617	0.163451	0.195979	0.0943933	0.0943933	0.0577551	0.146697	0.0943933	0.0943933	0.146697	0.0388839	0.366244	0.179876	0.242416
ERBB1 INTERNALIZATION PATHWAY	41	329663	27.4229	97	0.548658	3.10426e-15	7.46508e-12	85.567	KRAS (36.81 %) EGFR (18.40 %) NRAS ( 1.84 %) PTK2 ( 1.23 %) PIK3R2 ( 1.23 %) PIK3CD ( 1.23 %) CBLB ( 1.23 %) SHC1 ( 0.61 %) RAF1 ( 0.61 %) PIK3CA ( 0.61 %) HRAS ( 0.61 %) SRC ( 0.61 %)	0.033423	0.0657289	0.0969551	0.127138	0.033423	0.61397	0.639344	0.804409	0.526629	0.493326	0.288189	0.0969551	0.72522	0.0969551	0.705888	0.626873	0.238111	0.18451	0.0969551	0.156311	0.54245	0.0657289	0.0969551	0.127138	0.238111	0.263576	0.438927	0.263576	0.31198	0.156311	0.156311	0.0969551	0.238111	0.156311	0.156311	0.238111	0.0657289	0.54245	0.288189	0.378687
G1 PATHWAY	28	165230	27.4229	83	0.480965	3.1989e-15	7.46508e-12	69.8795	TP53 (39.26 %) ATM ( 7.98 %) CDKN2A ( 5.52 %) RB1 ( 4.29 %) TFDP1 ( 2.45 %) GSK3B ( 1.23 %) ABL1 ( 1.23 %) CDC25A ( 1.23 %) SMAD4 ( 1.23 %) CDKN2B ( 0.61 %) ATR ( 0.61 %) CCNE1 ( 0.61 %)	0.033423	0.0657289	0.0969551	0.127138	0.033423	0.61397	0.639344	0.804409	0.526629	0.493326	0.288189	0.0969551	0.72522	0.0969551	0.705888	0.626873	0.238111	0.18451	0.0969551	0.156311	0.54245	0.0657289	0.0969551	0.127138	0.238111	0.263576	0.438927	0.263576	0.31198	0.156311	0.156311	0.0969551	0.238111	0.156311	0.156311	0.238111	0.0657289	0.54245	0.288189	0.378687
P53 REGULATION PATHWAY	59	429200	27.4229	84	0.486166	3.1989e-15	7.46508e-12	80.9524	TP53 (39.26 %) ATM ( 7.98 %) CDKN2A ( 5.52 %) MDM2 ( 1.23 %) AKT1 ( 1.23 %) ABL1 ( 1.23 %) GSK3B ( 1.23 %) CCNG1 ( 0.61 %) CHEK1 ( 0.61 %) PRKCD ( 0.61 %) ATR ( 0.61 %) MAPK8 ( 0.61 %)	0.033423	0.0657289	0.0969551	0.127138	0.033423	0.61397	0.639344	0.804409	0.526629	0.493326	0.288189	0.0969551	0.72522	0.0969551	0.705888	0.626873	0.238111	0.18451	0.0969551	0.156311	0.54245	0.0657289	0.0969551	0.127138	0.238111	0.263576	0.438927	0.263576	0.31198	0.156311	0.156311	0.0969551	0.238111	0.156311	0.156311	0.238111	0.0657289	0.54245	0.288189	0.378687
CMYB PATHWAY	84	467689	27.4229	74	0.431118	3.2119e-15	7.46508e-12	85.1351	KRAS (36.81 %) CDKN2A ( 5.52 %) NRAS ( 1.84 %) CSF1R ( 1.23 %) MYC ( 1.23 %) GATA1 ( 1.23 %) MYB ( 1.23 %) KIT ( 0.61 %) ETS1 ( 0.61 %) NLK ( 0.61 %) SKI ( 0.61 %) HRAS ( 0.61 %)	0.033423	0.0657289	0.0969551	0.127138	0.033423	0.61397	0.639344	0.804409	0.526629	0.493326	0.288189	0.0969551	0.72522	0.0969551	0.705888	0.626873	0.238111	0.18451	0.0969551	0.156311	0.54245	0.0657289	0.0969551	0.127138	0.238111	0.263576	0.438927	0.263576	0.31198	0.156311	0.156311	0.0969551	0.238111	0.156311	0.156311	0.238111	0.0657289	0.54245	0.288189	0.378687
SHC1 EVENTS IN EGFR SIGNALING	15	94725	15.1752	94	0.791993	3.21705e-15	7.46508e-12	92.5532	KRAS (36.81 %) EGFR (18.40 %) NRAS ( 1.84 %) HRAS ( 0.61 %) RAF1 ( 0.61 %) SHC1 ( 0.61 %)	0.0168535	0.033423	0.0497133	0.0657289	0.0168535	0.378687	0.399453	0.557743	0.31198	0.288189	0.156311	0.0497133	0.475805	0.0497133	0.457679	0.389159	0.127138	0.0969551	0.0497133	0.0814747	0.323576	0.033423	0.0497133	0.0657289	0.127138	0.141848	0.250952	0.141848	0.17053	0.0814747	0.0814747	0.0497133	0.127138	0.0814747	0.0814747	0.127138	0.033423	0.323576	0.156311	0.211766
P53 SIGNALING PATHWAY	69	364916	29.2474	85	0.463331	3.23326e-15	7.46508e-12	80	TP53 (39.26 %) ATM ( 7.98 %) CDKN2A ( 5.52 %) PTEN ( 2.45 %) TSC2 ( 1.84 %) MDM2 ( 1.23 %) TP73 ( 0.61 %) BAX ( 0.61 %) ATR ( 0.61 %) CHEK1 ( 0.61 %) CCNG1 ( 0.61 %) CCNE1 ( 0.61 %) CCNB3 ( 0.61 %)	0.0361573	0.0710073	0.104597	0.136973	0.0361573	0.643407	0.668728	0.829276	0.55523	0.521234	0.308071	0.104597	0.753263	0.104597	0.734404	0.656301	0.255184	0.198254	0.104597	0.168177	0.571312	0.0710073	0.104597	0.136973	0.255184	0.282114	0.465307	0.282114	0.333089	0.168177	0.168177	0.104597	0.255184	0.168177	0.168177	0.255184	0.0710073	0.571312	0.308071	0.402846
PROSTATE CANCER	89	596366	52.6954	131	0.395499	3.33455e-15	7.46508e-12	54.9618	TP53 (39.26 %) KRAS (36.81 %) EGFR (18.40 %) RB1 ( 4.29 %) INSRR ( 3.68 %) PDGFRA ( 3.68 %) PIK3CG ( 3.07 %) PTEN ( 2.45 %) PDGFRB ( 1.84 %) ERBB2 ( 1.84 %) BRAF ( 1.84 %) FGFR2 ( 1.84 %) FGFR1 ( 1.84 %) NRAS ( 1.84 %) IGF1R ( 1.23 %) MDM2 ( 1.23 %) AKT1 ( 1.23 %) GSK3B ( 1.23 %) CTNNB1 ( 1.23 %) PIK3CD ( 1.23 %) PIK3R2 ( 1.23 %) RAF1 ( 0.61 %) IKBKB ( 0.61 %) AKT3 ( 0.61 %) HRAS ( 0.61 %) RELA (…	0.078869	0.151518	0.218437	0.280078	0.078869	0.89977	0.914956	0.980617	0.835914	0.806613	0.560242	0.218437	0.955923	0.218437	0.948052	0.907675	0.481712	0.389159	0.218437	0.336857	0.848855	0.151518	0.218437	0.280078	0.481712	0.522589	0.752563	0.522589	0.594925	0.336857	0.336857	0.218437	0.481712	0.336857	0.336857	0.481712	0.151518	0.848855	0.560242	0.683408
BLADDER CANCER	42	261012	31.0188	124	0.601797	3.3844e-15	7.46508e-12	56.4516	TP53 (39.26 %) KRAS (36.81 %) EGFR (18.40 %) CDKN2A ( 5.52 %) RB1 ( 4.29 %) ERBB2 ( 1.84 %) BRAF ( 1.84 %) NRAS ( 1.84 %) VEGFC ( 1.23 %) MDM2 ( 1.23 %) MYC ( 1.23 %) HRAS ( 0.61 %) RAF1 ( 0.61 %) ARAF ( 0.61 %)	0.0388839	0.0762558	0.112175	0.146697	0.0388839	0.6706	0.695718	0.850981	0.582103	0.547606	0.327397	0.112175	0.778444	0.112175	0.760155	0.683408	0.271873	0.211766	0.112175	0.179876	0.598353	0.0762558	0.112175	0.146697	0.271873	0.300186	0.490447	0.300186	0.353551	0.179876	0.179876	0.112175	0.271873	0.179876	0.179876	0.271873	0.0762558	0.598353	0.327397	0.426066
MYC ACTIV PATHWAY	79	449528	17.3904	71	0.61095	3.38917e-15	7.46508e-12	85.9155	TP53 (39.26 %) TERT ( 3.07 %) MYC ( 1.23 %) CDC25A ( 1.23 %) SMAD4 ( 1.23 %) EIF4G1 ( 1.23 %) BAX ( 0.61 %)	0.0196347	0.0388839	0.0577551	0.0762558	0.0196347	0.426066	0.448383	0.61397	0.353551	0.327397	0.179876	0.0577551	0.529303	0.0577551	0.51026	0.437335	0.146697	0.112175	0.0577551	0.0943933	0.366244	0.0388839	0.0577551	0.0762558	0.146697	0.163451	0.28617	0.163451	0.195979	0.0943933	0.0943933	0.0577551	0.146697	0.0943933	0.0943933	0.146697	0.0388839	0.366244	0.179876	0.242416
TCR RAS PATHWAY	14	87928	17.3904	70	0.60479	3.38917e-15	7.46508e-12	95.7143	KRAS (36.81 %) BRAF ( 1.84 %) NRAS ( 1.84 %) FOS ( 1.23 %) PRKCB ( 1.23 %) RAF1 ( 0.61 %) HRAS ( 0.61 %)	0.0196347	0.0388839	0.0577551	0.0762558	0.0196347	0.426066	0.448383	0.61397	0.353551	0.327397	0.179876	0.0577551	0.529303	0.0577551	0.51026	0.437335	0.146697	0.112175	0.0577551	0.0943933	0.366244	0.0388839	0.0577551	0.0762558	0.146697	0.163451	0.28617	0.163451	0.195979	0.0943933	0.0943933	0.0577551	0.146697	0.0943933	0.0943933	0.146697	0.0388839	0.366244	0.179876	0.242416
PRE NOTCH TRANSCRIPTION AND TRANSLATION	29	240746	17.3904	65	0.572605	3.38917e-15	7.46508e-12	84.6154	TP53 (39.26 %) TFDP1 ( 2.45 %) NOTCH4 ( 1.84 %) MAML1 ( 1.84 %) NOTCH3 ( 1.23 %) NOTCH2 ( 0.61 %) MAML2 ( 0.61 %)	0.0196347	0.0388839	0.0577551	0.0762558	0.0196347	0.426066	0.448383	0.61397	0.353551	0.327397	0.179876	0.0577551	0.529303	0.0577551	0.51026	0.437335	0.146697	0.112175	0.0577551	0.0943933	0.366244	0.0388839	0.0577551	0.0762558	0.146697	0.163451	0.28617	0.163451	0.195979	0.0943933	0.0943933	0.0577551	0.146697	0.0943933	0.0943933	0.146697	0.0388839	0.366244	0.179876	0.242416
PRE NOTCH EXPRESSION AND PROCESSING	44	328464	17.3904	65	0.572605	3.38917e-15	7.46508e-12	84.6154	TP53 (39.26 %) TFDP1 ( 2.45 %) NOTCH4 ( 1.84 %) MAML1 ( 1.84 %) NOTCH3 ( 1.23 %) NOTCH2 ( 0.61 %) MAML2 ( 0.61 %)	0.0196347	0.0388839	0.0577551	0.0762558	0.0196347	0.426066	0.448383	0.61397	0.353551	0.327397	0.179876	0.0577551	0.529303	0.0577551	0.51026	0.437335	0.146697	0.112175	0.0577551	0.0943933	0.366244	0.0388839	0.0577551	0.0762558	0.146697	0.163451	0.28617	0.163451	0.195979	0.0943933	0.0943933	0.0577551	0.146697	0.0943933	0.0943933	0.146697	0.0388839	0.366244	0.179876	0.242416
ARMS MEDIATED ACTIVATION	17	100805	17.3904	70	0.60479	3.38917e-15	7.46508e-12	91.4286	KRAS (36.81 %) NTRK1 ( 4.29 %) NRAS ( 1.84 %) BRAF ( 1.84 %) RAPGEF1 ( 0.61 %) HRAS ( 0.61 %) RAF1 ( 0.61 %)	0.0196347	0.0388839	0.0577551	0.0762558	0.0196347	0.426066	0.448383	0.61397	0.353551	0.327397	0.179876	0.0577551	0.529303	0.0577551	0.51026	0.437335	0.146697	0.112175	0.0577551	0.0943933	0.366244	0.0388839	0.0577551	0.0762558	0.146697	0.163451	0.28617	0.163451	0.195979	0.0943933	0.0943933	0.0577551	0.146697	0.0943933	0.0943933	0.146697	0.0388839	0.366244	0.179876	0.242416
FRS2 MEDIATED CASCADE	36	176576	17.3904	71	0.61095	3.38917e-15	7.46508e-12	90.1408	KRAS (36.81 %) FGFR4 ( 4.29 %) FGFR1 ( 1.84 %) FGFR2 ( 1.84 %) NRAS ( 1.84 %) HRAS ( 0.61 %) RAF1 ( 0.61 %)	0.0196347	0.0388839	0.0577551	0.0762558	0.0196347	0.426066	0.448383	0.61397	0.353551	0.327397	0.179876	0.0577551	0.529303	0.0577551	0.51026	0.437335	0.146697	0.112175	0.0577551	0.0943933	0.366244	0.0388839	0.0577551	0.0762558	0.146697	0.163451	0.28617	0.163451	0.195979	0.0943933	0.0943933	0.0577551	0.146697	0.0943933	0.0943933	0.146697	0.0388839	0.366244	0.179876	0.242416
SHC MEDIATED CASCADE	28	127107	17.3904	70	0.60479	3.38917e-15	7.46508e-12	88.5714	KRAS (36.81 %) FGFR4 ( 4.29 %) FGFR1 ( 1.84 %) FGFR2 ( 1.84 %) NRAS ( 1.84 %) HRAS ( 0.61 %) SHC1 ( 0.61 %)	0.0196347	0.0388839	0.0577551	0.0762558	0.0196347	0.426066	0.448383	0.61397	0.353551	0.327397	0.179876	0.0577551	0.529303	0.0577551	0.51026	0.437335	0.146697	0.112175	0.0577551	0.0943933	0.366244	0.0388839	0.0577551	0.0762558	0.146697	0.163451	0.28617	0.163451	0.195979	0.0943933	0.0943933	0.0577551	0.146697	0.0943933	0.0943933	0.146697	0.0388839	0.366244	0.179876	0.242416
SHC RELATED EVENTS	17	100924	17.3904	66	0.579236	3.38917e-15	7.46508e-12	92.4242	KRAS (36.81 %) INSR ( 1.84 %) NRAS ( 1.84 %) HRAS ( 0.61 %) SHC3 ( 0.61 %) RAF1 ( 0.61 %) SHC1 ( 0.61 %)	0.0196347	0.0388839	0.0577551	0.0762558	0.0196347	0.426066	0.448383	0.61397	0.353551	0.327397	0.179876	0.0577551	0.529303	0.0577551	0.51026	0.437335	0.146697	0.112175	0.0577551	0.0943933	0.366244	0.0388839	0.0577551	0.0762558	0.146697	0.163451	0.28617	0.163451	0.195979	0.0943933	0.0943933	0.0577551	0.146697	0.0943933	0.0943933	0.146697	0.0388839	0.366244	0.179876	0.242416
SIGNALING BY ERBB2	101	710476	52.6954	112	0.327445	3.42006e-15	7.46508e-12	73.2143	KRAS (36.81 %) EGFR (18.40 %) ERBB4 ( 4.91 %) PRKCG ( 2.45 %) PTEN ( 2.45 %) ERBB2 ( 1.84 %) ERBB3 ( 1.84 %) FYN ( 1.84 %) NRAS ( 1.84 %) PRKACB ( 1.84 %) PRKCE ( 1.84 %) TSC2 ( 1.84 %) AKT1 ( 1.23 %) FOXO3 ( 1.23 %) GRB7 ( 1.23 %) MDM2 ( 1.23 %) YES1 ( 1.23 %) AKT3 ( 0.61 %) GSK3A ( 0.61 %) HRAS ( 0.61 %) MATK ( 0.61 %) PIK3CA ( 0.61 %) PLCG1 ( 0.61 %) PRKACA ( 0.61 %) PRKAR1A ( 0.61 %) PRKCD ( …	0.078869	0.151518	0.218437	0.280078	0.078869	0.89977	0.914956	0.980617	0.835914	0.806613	0.560242	0.218437	0.955923	0.218437	0.948052	0.907675	0.481712	0.389159	0.218437	0.336857	0.848855	0.151518	0.218437	0.280078	0.481712	0.522589	0.752563	0.522589	0.594925	0.336857	0.336857	0.218437	0.481712	0.336857	0.336857	0.481712	0.151518	0.848855	0.560242	0.683408
MELANOGENESIS	102	635468	29.2474	79	0.43154	3.42703e-15	7.46508e-12	89.8734	KRAS (36.81 %) GNAS ( 4.29 %) PRKCG ( 2.45 %) NRAS ( 1.84 %) PRKACB ( 1.84 %) PRKCB ( 1.23 %) GSK3B ( 1.23 %) CTNNB1 ( 1.23 %) PRKX ( 0.61 %) PRKACA ( 0.61 %) RAF1 ( 0.61 %) KIT ( 0.61 %) HRAS ( 0.61 %)	0.0361573	0.0710073	0.104597	0.136973	0.0361573	0.643407	0.668728	0.829276	0.55523	0.521234	0.308071	0.104597	0.753263	0.104597	0.734404	0.656301	0.255184	0.198254	0.104597	0.168177	0.571312	0.0710073	0.104597	0.136973	0.255184	0.282114	0.465307	0.282114	0.333089	0.168177	0.168177	0.104597	0.255184	0.168177	0.168177	0.255184	0.0710073	0.571312	0.308071	0.402846
AXON GUIDANCE	251	1978253	52.6954	110	0.31962	3.43371e-15	7.46508e-12	75.4545	KRAS (36.81 %) EGFR (18.40 %) ROBO2 ( 3.07 %) PAK7 ( 2.45 %) ROBO1 ( 2.45 %) PAK4 ( 1.84 %) ERBB2 ( 1.84 %) FGFR1 ( 1.84 %) FYN ( 1.84 %) MET ( 1.84 %) NRAS ( 1.84 %) FES ( 1.23 %) ABL1 ( 1.23 %) CNTN6 ( 1.23 %) RPS6KA6 ( 1.23 %) PAK6 ( 1.23 %) PTK2 ( 1.23 %) RANBP9 ( 0.61 %) CDK5 ( 0.61 %) ABL2 ( 0.61 %) HRAS ( 0.61 %) RHOB ( 0.61 %) PLCG1 ( 0.61 %) PRKCQ ( 0.61 %) RAF1 ( 0.61 %) ROCK1 ( 0.61 %)…	0.078869	0.151518	0.218437	0.280078	0.078869	0.89977	0.914956	0.980617	0.835914	0.806613	0.560242	0.218437	0.955923	0.218437	0.948052	0.907675	0.481712	0.389159	0.218437	0.336857	0.848855	0.151518	0.218437	0.280078	0.481712	0.522589	0.752563	0.522589	0.594925	0.336857	0.336857	0.218437	0.481712	0.336857	0.336857	0.481712	0.151518	0.848855	0.560242	0.683408
GASTRIN CREB SIGNALLING PATHWAY VIA PKC AND MAPK	205	899438	31.0188	102	0.516975	3.55262e-15	7.46508e-12	90.1961	KRAS (36.81 %) EGFR (18.40 %) NRAS ( 1.84 %) PRKCE ( 1.84 %) PIK3R2 ( 1.23 %) CYSLTR2 ( 1.23 %) HRAS ( 0.61 %) PIK3CA ( 0.61 %) PRKCD ( 0.61 %) PRKCH ( 0.61 %) PRKCQ ( 0.61 %) MAPK7 ( 0.61 %) RAF1 ( 0.61 %) RPS6KA1 ( 0.61 %)	0.0388839	0.0762558	0.112175	0.146697	0.0388839	0.6706	0.695718	0.850981	0.582103	0.547606	0.327397	0.112175	0.778444	0.112175	0.760155	0.683408	0.271873	0.211766	0.112175	0.179876	0.598353	0.0762558	0.112175	0.146697	0.271873	0.300186	0.490447	0.300186	0.353551	0.179876	0.179876	0.112175	0.271873	0.179876	0.179876	0.271873	0.0762558	0.598353	0.327397	0.426066
GLIOMA	65	459059	50.2335	130	0.41295	3.63713e-15	7.46508e-12	53.8462	TP53 (39.26 %) KRAS (36.81 %) EGFR (18.40 %) CDKN2A ( 5.52 %) RB1 ( 4.29 %) PDGFRA ( 3.68 %) PIK3CG ( 3.07 %) PRKCG ( 2.45 %) PTEN ( 2.45 %) PDGFRB ( 1.84 %) BRAF ( 1.84 %) NRAS ( 1.84 %) PRKCB ( 1.23 %) IGF1R ( 1.23 %) MDM2 ( 1.23 %) AKT1 ( 1.23 %) PIK3CD ( 1.23 %) PLCG2 ( 1.23 %) PIK3R2 ( 1.23 %) RAF1 ( 0.61 %) SHC1 ( 0.61 %) AKT3 ( 0.61 %) HRAS ( 0.61 %) SHC3 ( 0.61 %) ARAF ( 0.61 %) PIK3CA ( …	0.0736353	0.141848	0.205039	0.263576	0.0736353	0.882538	0.8992	0.974559	0.814132	0.783409	0.534607	0.205039	0.945334	0.205039	0.936298	0.891188	0.457679	0.368036	0.205039	0.317803	0.827819	0.141848	0.205039	0.263576	0.457679	0.497613	0.727545	0.497613	0.568876	0.317803	0.317803	0.205039	0.457679	0.317803	0.317803	0.457679	0.141848	0.827819	0.534607	0.657273
BASAL CELL CARCINOMA	55	321594	19.5303	78	0.601385	3.73352e-15	7.46508e-12	84.6154	TP53 (39.26 %) APC ( 6.75 %) PTCH1 ( 3.07 %) PTCH2 ( 1.23 %) GSK3B ( 1.23 %) CTNNB1 ( 1.23 %) STK36 ( 1.23 %) SMO ( 0.61 %)	0.022408	0.0443139	0.0657289	0.0866641	0.022408	0.469832	0.493326	0.663049	0.39261	0.364446	0.202783	0.0657289	0.577341	0.0657289	0.557743	0.481712	0.165818	0.127138	0.0657289	0.10713	0.40622	0.0443139	0.0657289	0.0866641	0.165818	0.18451	0.319732	0.18451	0.220647	0.10713	0.10713	0.0657289	0.165818	0.10713	0.10713	0.165818	0.0443139	0.40622	0.202783	0.271873
ARF PATHWAY	17	106551	19.5303	73	0.572613	3.73352e-15	7.46508e-12	78.0822	TP53 (39.26 %) CDKN2A ( 5.52 %) RB1 ( 4.29 %) PIK3CG ( 3.07 %) MDM2 ( 1.23 %) ABL1 ( 1.23 %) MYC ( 1.23 %) PIK3CA ( 0.61 %)	0.022408	0.0443139	0.0657289	0.0866641	0.022408	0.469832	0.493326	0.663049	0.39261	0.364446	0.202783	0.0657289	0.577341	0.0657289	0.557743	0.481712	0.165818	0.127138	0.0657289	0.10713	0.40622	0.0443139	0.0657289	0.0866641	0.165818	0.18451	0.319732	0.18451	0.220647	0.10713	0.10713	0.0657289	0.165818	0.10713	0.10713	0.165818	0.0443139	0.40622	0.202783	0.271873
PROLONGED ERK ACTIVATION EVENTS	19	117695	19.5303	70	0.554388	3.73352e-15	7.46508e-12	90	KRAS (36.81 %) NTRK1 ( 4.29 %) NRAS ( 1.84 %) BRAF ( 1.84 %) RAPGEF1 ( 0.61 %) HRAS ( 0.61 %) PLCG1 ( 0.61 %) RAF1 ( 0.61 %)	0.022408	0.0443139	0.0657289	0.0866641	0.022408	0.469832	0.493326	0.663049	0.39261	0.364446	0.202783	0.0657289	0.577341	0.0657289	0.557743	0.481712	0.165818	0.127138	0.0657289	0.10713	0.40622	0.0443139	0.0657289	0.0866641	0.165818	0.18451	0.319732	0.18451	0.220647	0.10713	0.10713	0.0657289	0.165818	0.10713	0.10713	0.165818	0.0443139	0.40622	0.202783	0.271873
NCAM SIGNALING FOR NEURITE OUT GROWTH	64	539452	19.5303	69	0.548139	3.73352e-15	7.46508e-12	91.3043	KRAS (36.81 %) FGFR1 ( 1.84 %) FYN ( 1.84 %) NRAS ( 1.84 %) PTK2 ( 1.23 %) HRAS ( 0.61 %) RAF1 ( 0.61 %) SRC ( 0.61 %)	0.022408	0.0443139	0.0657289	0.0866641	0.022408	0.469832	0.493326	0.663049	0.39261	0.364446	0.202783	0.0657289	0.577341	0.0657289	0.557743	0.481712	0.165818	0.127138	0.0657289	0.10713	0.40622	0.0443139	0.0657289	0.0866641	0.165818	0.18451	0.319732	0.18451	0.220647	0.10713	0.10713	0.0657289	0.165818	0.10713	0.10713	0.165818	0.0443139	0.40622	0.202783	0.271873
MTOR 4PATHWAY	69	485709	29.2474	77	0.420403	3.73453e-15	7.46508e-12	90.9091	KRAS (36.81 %) BRAF ( 1.84 %) TSC2 ( 1.84 %) NRAS ( 1.84 %) IRS1 ( 1.84 %) TSC1 ( 1.23 %) RPTOR ( 1.23 %) AKT1 ( 1.23 %) CCNE1 ( 0.61 %) HRAS ( 0.61 %) RPS6KA1 ( 0.61 %) RAF1 ( 0.61 %) IKBKB ( 0.61 %)	0.0361573	0.0710073	0.104597	0.136973	0.0361573	0.643407	0.668728	0.829276	0.55523	0.521234	0.308071	0.104597	0.753263	0.104597	0.734404	0.656301	0.255184	0.198254	0.104597	0.168177	0.571312	0.0710073	0.104597	0.136973	0.255184	0.282114	0.465307	0.282114	0.333089	0.168177	0.168177	0.104597	0.255184	0.168177	0.168177	0.255184	0.0710073	0.571312	0.308071	0.402846
ER NONGENOMIC PATHWAY	41	301665	19.5303	68	0.541799	3.73768e-15	7.46508e-12	94.1176	KRAS (36.81 %) NRAS ( 1.84 %) AKT1 ( 1.23 %) IGF1R ( 1.23 %) SRC ( 0.61 %) PIK3CA ( 0.61 %) SHC1 ( 0.61 %) HRAS ( 0.61 %)	0.022408	0.0443139	0.0657289	0.0866641	0.022408	0.469832	0.493326	0.663049	0.39261	0.364446	0.202783	0.0657289	0.577341	0.0657289	0.557743	0.481712	0.165818	0.127138	0.0657289	0.10713	0.40622	0.0443139	0.0657289	0.0866641	0.165818	0.18451	0.319732	0.18451	0.220647	0.10713	0.10713	0.0657289	0.165818	0.10713	0.10713	0.165818	0.0443139	0.40622	0.202783	0.271873
AURORA A PATHWAY	31	181964	19.5303	67	0.535365	3.75946e-15	7.46508e-12	88.0597	TP53 (39.26 %) GSK3B ( 1.23 %) AKT1 ( 1.23 %) MDM2 ( 1.23 %) BRCA1 ( 0.61 %) AURKB ( 0.61 %) PRKACA ( 0.61 %) AURKA ( 0.61 %)	0.022408	0.0443139	0.0657289	0.0866641	0.022408	0.469832	0.493326	0.663049	0.39261	0.364446	0.202783	0.0657289	0.577341	0.0657289	0.557743	0.481712	0.165818	0.127138	0.0657289	0.10713	0.40622	0.0443139	0.0657289	0.0866641	0.165818	0.18451	0.319732	0.18451	0.220647	0.10713	0.10713	0.0657289	0.165818	0.10713	0.10713	0.165818	0.0443139	0.40622	0.202783	0.271873
P53 DOWNSTREAM PATHWAY	137	764820	36.0407	103	0.456044	3.81545e-15	7.46508e-12	67.9612	TP53 (39.26 %) EGFR (18.40 %) APC ( 6.75 %) RB1 ( 4.29 %) TP63 ( 2.45 %) PTEN ( 2.45 %) TFDP1 ( 2.45 %) TSC2 ( 1.84 %) MET ( 1.84 %) MDM2 ( 1.23 %) BCL6 ( 1.23 %) MAP4K4 ( 0.61 %) TP73 ( 0.61 %) CCNG1 ( 0.61 %) BAX ( 0.61 %) HTT ( 0.61 %) EPHA2 ( 0.61 %)	0.0470174	0.0918242	0.134524	0.175217	0.0470174	0.740356	0.764197	0.900899	0.653367	0.61832	0.382197	0.134524	0.839591	0.134524	0.823372	0.752563	0.319732	0.250952	0.134524	0.213996	0.669665	0.0918242	0.134524	0.175217	0.319732	0.351717	0.558994	0.351717	0.411245	0.213996	0.213996	0.134524	0.319732	0.213996	0.213996	0.319732	0.0918242	0.669665	0.382197	0.490447
LONG TERM POTENTIATION	70	536226	29.2474	76	0.414726	3.90986e-15	7.46508e-12	89.4737	KRAS (36.81 %) PRKCG ( 2.45 %) BRAF ( 1.84 %) NRAS ( 1.84 %) PRKACB ( 1.84 %) PRKCB ( 1.23 %) RPS6KA6 ( 1.23 %) RAF1 ( 0.61 %) RPS6KA1 ( 0.61 %) HRAS ( 0.61 %) PRKX ( 0.61 %) ARAF ( 0.61 %) PRKACA ( 0.61 %)	0.0361573	0.0710073	0.104597	0.136973	0.0361573	0.643407	0.668728	0.829276	0.55523	0.521234	0.308071	0.104597	0.753263	0.104597	0.734404	0.656301	0.255184	0.198254	0.104597	0.168177	0.571312	0.0710073	0.104597	0.136973	0.255184	0.282114	0.465307	0.282114	0.333089	0.168177	0.168177	0.104597	0.255184	0.168177	0.168177	0.255184	0.0710073	0.571312	0.308071	0.402846
DOWNSTREAM SIGNALING EVENTS OF B CELL RECEPTOR BCR	97	562706	29.2474	76	0.414726	3.90986e-15	7.46508e-12	89.4737	KRAS (36.81 %) PTEN ( 2.45 %) NRAS ( 1.84 %) TSC2 ( 1.84 %) AKT1 ( 1.23 %) FOXO3 ( 1.23 %) MDM2 ( 1.23 %) PRKCB ( 1.23 %) AKT3 ( 0.61 %) GSK3A ( 0.61 %) HRAS ( 0.61 %) IKBKB ( 0.61 %) RELA ( 0.61 %)	0.0361573	0.0710073	0.104597	0.136973	0.0361573	0.643407	0.668728	0.829276	0.55523	0.521234	0.308071	0.104597	0.753263	0.104597	0.734404	0.656301	0.255184	0.198254	0.104597	0.168177	0.571312	0.0710073	0.104597	0.136973	0.255184	0.282114	0.465307	0.282114	0.333089	0.168177	0.168177	0.104597	0.255184	0.168177	0.168177	0.255184	0.0710073	0.571312	0.308071	0.402846
LKB1 PATHWAY	47	336776	23.6024	88	0.571527	3.93e-15	7.46508e-12	75	TP53 (39.26 %) STK11 (20.86 %) TSC2 ( 1.84 %) SMAD4 ( 1.23 %) RPTOR ( 1.23 %) MYC ( 1.23 %) GSK3B ( 1.23 %) TSC1 ( 1.23 %) PRKACA ( 0.61 %) STRADB ( 0.61 %)	0.0279311	0.0550821	0.0814747	0.10713	0.0279311	0.547606	0.572525	0.743281	0.46379	0.432533	0.246696	0.0814747	0.659209	0.0814747	0.639344	0.560242	0.202783	0.156311	0.0814747	0.132069	0.478767	0.0550821	0.0814747	0.10713	0.202783	0.225051	0.382197	0.225051	0.267736	0.132069	0.132069	0.0814747	0.202783	0.132069	0.132069	0.202783	0.0550821	0.478767	0.246696	0.327397
ERBB SIGNALING PATHWAY	87	607194	60.5437	118	0.289813	4.00065e-15	7.46508e-12	69.4915	KRAS (36.81 %) EGFR (18.40 %) ERBB4 ( 4.91 %) PAK3 ( 3.07 %) PIK3CG ( 3.07 %) PRKCG ( 2.45 %) PAK7 ( 2.45 %) PAK4 ( 1.84 %) ERBB2 ( 1.84 %) ERBB3 ( 1.84 %) BRAF ( 1.84 %) NRAS ( 1.84 %) PRKCB ( 1.23 %) PTK2 ( 1.23 %) ABL1 ( 1.23 %) AKT1 ( 1.23 %) STAT5B ( 1.23 %) PAK6 ( 1.23 %) MYC ( 1.23 %) GSK3B ( 1.23 %) CBLB ( 1.23 %) PIK3CD ( 1.23 %) PLCG2 ( 1.23 %) PIK3R2 ( 1.23 %) RAF1 ( 0.61 %) SHC1 ( 0.6…	0.0969551	0.18451	0.263576	0.334976	0.0969551	0.942474	0.953088	0.992517	0.893927	0.869927	0.639344	0.263576	0.979253	0.263576	0.974559	0.948052	0.557743	0.457679	0.263576	0.399453	0.904211	0.18451	0.263576	0.334976	0.557743	0.600622	0.823372	0.600622	0.674311	0.399453	0.399453	0.263576	0.557743	0.399453	0.399453	0.557743	0.18451	0.904211	0.639344	0.760155
SOS MEDIATED SIGNALLING	14	89386	12.8801	66	0.709626	4.00559e-15	7.46508e-12	95.4545	KRAS (36.81 %) IRS1 ( 1.84 %) NRAS ( 1.84 %) HRAS ( 0.61 %) RAF1 ( 0.61 %)	0.0140645	0.0279311	0.0416027	0.0550821	0.0140645	0.327397	0.346184	0.493326	0.267736	0.246696	0.132069	0.0416027	0.416227	0.0416027	0.399453	0.336857	0.10713	0.0814747	0.0416027	0.0683719	0.278035	0.0279311	0.0416027	0.0550821	0.10713	0.119688	0.213996	0.119688	0.144276	0.0683719	0.0683719	0.0416027	0.10713	0.0683719	0.0683719	0.10713	0.0279311	0.278035	0.132069	0.179876
INTRINSIC PATHWAY FOR APOPTOSIS	30	150597	12.8801	66	0.709626	4.00559e-15	7.46508e-12	89.3939	TP53 (39.26 %) TFDP1 ( 2.45 %) AKT1 ( 1.23 %) MAPK8 ( 0.61 %) BAX ( 0.61 %)	0.0140645	0.0279311	0.0416027	0.0550821	0.0140645	0.327397	0.346184	0.493326	0.267736	0.246696	0.132069	0.0416027	0.416227	0.0416027	0.399453	0.336857	0.10713	0.0814747	0.0416027	0.0683719	0.278035	0.0279311	0.0416027	0.0550821	0.10713	0.119688	0.213996	0.119688	0.144276	0.0683719	0.0683719	0.0416027	0.10713	0.0683719	0.0683719	0.10713	0.0279311	0.278035	0.132069	0.179876
AUTODEGRADATION OF THE E3 UBIQUITIN LIGASE COP1	51	257634	5.45893	76	1.14371	4.10439e-15	7.46508e-12	94.7368	TP53 (39 %) ATM ( 8 %)	0.0056497	0.0112675	0.0168535	0.022408	0.0056497	0.146697	0.156311	0.238111	0.117191	0.10713	0.0550821	0.0168535	0.193698	0.0168535	0.18451	0.151518	0.0443139	0.033423	0.0168535	0.0279311	0.122178	0.0112675	0.0168535	0.022408	0.0443139	0.0497133	0.0918242	0.0497133	0.0604206	0.0279311	0.0279311	0.0168535	0.0443139	0.0279311	0.0279311	0.0443139	0.0112675	0.122178	0.0550821	0.0762558
LONG TERM DEPRESSION	70	491186	25.5423	78	0.484835	4.19437e-15	7.46508e-12	92.3077	KRAS (36.81 %) GNAS ( 4.29 %) PRKCG ( 2.45 %) BRAF ( 1.84 %) NRAS ( 1.84 %) PRKCB ( 1.23 %) IGF1R ( 1.23 %) RAF1 ( 0.61 %) PRKG1 ( 0.61 %) HRAS ( 0.61 %) ARAF ( 0.61 %)	0.030681	0.0604206	0.0892478	0.117191	0.030681	0.582103	0.607353	0.77592	0.496188	0.46379	0.267736	0.0892478	0.69399	0.0892478	0.674311	0.594925	0.220647	0.17053	0.0892478	0.144276	0.511646	0.0604206	0.0892478	0.117191	0.220647	0.244559	0.411245	0.244559	0.290203	0.144276	0.144276	0.0892478	0.220647	0.144276	0.144276	0.220647	0.0604206	0.511646	0.267736	0.353551
MAPK TRK PATHWAY	34	221130	29.2474	72	0.391245	4.38919e-15	7.46508e-12	90.2778	KRAS (36.81 %) NRAS ( 1.84 %) BRAF ( 1.84 %) MAP3K2 ( 1.23 %) FOS ( 1.23 %) MAP2K5 ( 1.23 %) CDK5 ( 0.61 %) MAP2K6 ( 0.61 %) MAPK7 ( 0.61 %) PRKCD ( 0.61 %) RPS6KA1 ( 0.61 %) HRAS ( 0.61 %) RAF1 ( 0.61 %)	0.0361573	0.0710073	0.104597	0.136973	0.0361573	0.643407	0.668728	0.829276	0.55523	0.521234	0.308071	0.104597	0.753263	0.104597	0.734404	0.656301	0.255184	0.198254	0.104597	0.168177	0.571312	0.0710073	0.104597	0.136973	0.255184	0.282114	0.465307	0.282114	0.333089	0.168177	0.168177	0.104597	0.255184	0.168177	0.168177	0.255184	0.0710073	0.571312	0.308071	0.402846
EPHB FWD PATHWAY	40	296490	27.4229	68	0.394395	4.43674e-15	7.46508e-12	85.2941	KRAS (36.81 %) EPHB1 ( 2.45 %) NRAS ( 1.84 %) EPHB4 ( 1.23 %) GRB7 ( 1.23 %) PTK2 ( 1.23 %) SRC ( 0.61 %) HRAS ( 0.61 %) MAP4K4 ( 0.61 %) PIK3CA ( 0.61 %) ROCK1 ( 0.61 %) SHC1 ( 0.61 %)	0.033423	0.0657289	0.0969551	0.127138	0.033423	0.61397	0.639344	0.804409	0.526629	0.493326	0.288189	0.0969551	0.72522	0.0969551	0.705888	0.626873	0.238111	0.18451	0.0969551	0.156311	0.54245	0.0657289	0.0969551	0.127138	0.238111	0.263576	0.438927	0.263576	0.31198	0.156311	0.156311	0.0969551	0.238111	0.156311	0.156311	0.238111	0.0657289	0.54245	0.288189	0.378687
PI3K PLC TRK PATHWAY	36	228615	29.2474	71	0.385171	4.45423e-15	7.46508e-12	83.0986	KRAS (36.81 %) NTRK1 ( 4.29 %) NRAS ( 1.84 %) FOXO3 ( 1.23 %) GSK3B ( 1.23 %) AKT1 ( 1.23 %) PRKCD ( 0.61 %) PLCG1 ( 0.61 %) SHC1 ( 0.61 %) SRC ( 0.61 %) PIK3CA ( 0.61 %) HRAS ( 0.61 %) STAT5A ( 0.61 %)	0.0361573	0.0710073	0.104597	0.136973	0.0361573	0.643407	0.668728	0.829276	0.55523	0.521234	0.308071	0.104597	0.753263	0.104597	0.734404	0.656301	0.255184	0.198254	0.104597	0.168177	0.571312	0.0710073	0.104597	0.136973	0.255184	0.282114	0.465307	0.282114	0.333089	0.168177	0.168177	0.104597	0.255184	0.168177	0.168177	0.255184	0.0710073	0.571312	0.308071	0.402846
SIGNALLING TO ERKS	36	210377	29.2474	71	0.385171	4.45423e-15	7.46508e-12	85.9155	KRAS (36.81 %) NTRK1 ( 4.29 %) NRAS ( 1.84 %) BRAF ( 1.84 %) RAPGEF1 ( 0.61 %) HRAS ( 0.61 %) PLCG1 ( 0.61 %) SHC3 ( 0.61 %) RAF1 ( 0.61 %) RALA ( 0.61 %) RALB ( 0.61 %) SHC1 ( 0.61 %) SRC ( 0.61 %)	0.0361573	0.0710073	0.104597	0.136973	0.0361573	0.643407	0.668728	0.829276	0.55523	0.521234	0.308071	0.104597	0.753263	0.104597	0.734404	0.656301	0.255184	0.198254	0.104597	0.168177	0.571312	0.0710073	0.104597	0.136973	0.255184	0.282114	0.465307	0.282114	0.333089	0.168177	0.168177	0.104597	0.255184	0.168177	0.168177	0.255184	0.0710073	0.571312	0.308071	0.402846
SHP2 PATHWAY	58	417451	42.1384	107	0.404705	4.52274e-15	7.46508e-12	71.028	KRAS (36.81 %) EGFR (18.40 %) KDR ( 4.91 %) NTRK3 ( 4.29 %) NTRK1 ( 4.29 %) NTRK2 ( 3.68 %) JAK2 ( 3.07 %) IRS1 ( 1.84 %) NRAS ( 1.84 %) PDGFRB ( 1.84 %) PTPN11 ( 1.84 %) JAK3 ( 1.84 %) TEK ( 1.23 %) JAK1 ( 1.23 %) IGF1R ( 1.23 %) PRKACA ( 0.61 %) PIK3CA ( 0.61 %) RAF1 ( 0.61 %) LCK ( 0.61 %) SHC1 ( 0.61 %) HRAS ( 0.61 %)	0.0577551	0.112175	0.163451	0.211766	0.0577551	0.810946	0.832153	0.942474	0.729851	0.695718	0.448383	0.163451	0.895715	0.163451	0.882538	0.821865	0.378687	0.300186	0.163451	0.257291	0.745454	0.112175	0.163451	0.211766	0.378687	0.414571	0.636266	0.414571	0.480241	0.257291	0.257291	0.163451	0.378687	0.257291	0.257291	0.378687	0.112175	0.745454	0.448383	0.565197
JNK MAPK PATHWAY	40	285034	29.2474	70	0.37901	4.61758e-15	7.46508e-12	80	TP53 (39.26 %) MAP3K3 ( 1.84 %) MAP3K4 ( 1.84 %) MAP3K10 ( 1.23 %) AKT1 ( 1.23 %) MAP3K2 ( 1.23 %) MAP3K12 ( 1.23 %) MAP2K5 ( 1.23 %) SHC1 ( 0.61 %) GCK ( 0.61 %) MAPK7 ( 0.61 %) MAP3K9 ( 0.61 %) MAPK8 ( 0.61 %)	0.0361573	0.0710073	0.104597	0.136973	0.0361573	0.643407	0.668728	0.829276	0.55523	0.521234	0.308071	0.104597	0.753263	0.104597	0.734404	0.656301	0.255184	0.198254	0.104597	0.168177	0.571312	0.0710073	0.104597	0.136973	0.255184	0.282114	0.465307	0.282114	0.333089	0.168177	0.168177	0.104597	0.255184	0.168177	0.168177	0.255184	0.0710073	0.571312	0.308071	0.402846
PANCREATIC CANCER	70	492931	51.4779	127	0.392183	4.78425e-15	7.46508e-12	56.6929	TP53 (39.26 %) KRAS (36.81 %) EGFR (18.40 %) CDKN2A ( 5.52 %) RB1 ( 4.29 %) PIK3CG ( 3.07 %) ERBB2 ( 1.84 %) BRAF ( 1.84 %) BRCA2 ( 1.23 %) JAK1 ( 1.23 %) AKT1 ( 1.23 %) SMAD4 ( 1.23 %) VEGFC ( 1.23 %) PIK3CD ( 1.23 %) PIK3R2 ( 1.23 %) STAT3 ( 0.61 %) RAF1 ( 0.61 %) IKBKB ( 0.61 %) AKT3 ( 0.61 %) SMAD2 ( 0.61 %) MAPK8 ( 0.61 %) RELA ( 0.61 %) ARAF ( 0.61 %) TGFBR2 ( 0.61 %) TGFBR1 ( 0.61 %) RALB …	0.0762558	0.146697	0.211766	0.271873	0.0762558	0.891495	0.907413	0.977793	0.825362	0.795339	0.547606	0.211766	0.950913	0.211766	0.942474	0.89977	0.469832	0.378687	0.211766	0.327397	0.83868	0.146697	0.211766	0.271873	0.469832	0.51026	0.740356	0.51026	0.582103	0.327397	0.327397	0.211766	0.469832	0.327397	0.327397	0.469832	0.146697	0.83868	0.547606	0.6706
ALDOSTERONE REGULATED SODIUM REABSORPTION	42	263562	21.5996	73	0.528876	4.81184e-15	7.46508e-12	90.411	KRAS (36.81 %) PIK3CG ( 3.07 %) PRKCG ( 2.45 %) IRS1 ( 1.84 %) INSR ( 1.84 %) PRKCB ( 1.23 %) PIK3CD ( 1.23 %) PIK3R2 ( 1.23 %) PIK3CA ( 0.61 %)	0.0251735	0.0497133	0.0736353	0.0969551	0.0251735	0.51026	0.534607	0.705888	0.429309	0.399453	0.225051	0.0736353	0.620476	0.0736353	0.600622	0.522589	0.18451	0.141848	0.0736353	0.119688	0.443675	0.0497133	0.0736353	0.0969551	0.18451	0.205039	0.351717	0.205039	0.244559	0.119688	0.119688	0.0736353	0.18451	0.119688	0.119688	0.18451	0.0497133	0.443675	0.225051	0.300186
ATM PATHWAY	20	136962	21.5996	81	0.574038	4.81184e-15	7.46508e-12	91.358	TP53 (39.26 %) ATM ( 7.98 %) MDM2 ( 1.23 %) ABL1 ( 1.23 %) MAPK8 ( 0.61 %) BRCA1 ( 0.61 %) RELA ( 0.61 %) CHEK1 ( 0.61 %) TP73 ( 0.61 %)	0.0251735	0.0497133	0.0736353	0.0969551	0.0251735	0.51026	0.534607	0.705888	0.429309	0.399453	0.225051	0.0736353	0.620476	0.0736353	0.600622	0.522589	0.18451	0.141848	0.0736353	0.119688	0.443675	0.0497133	0.0736353	0.0969551	0.18451	0.205039	0.351717	0.205039	0.244559	0.119688	0.119688	0.0736353	0.18451	0.119688	0.119688	0.18451	0.0497133	0.443675	0.225051	0.300186
G2 PATHWAY	24	163841	21.5996	79	0.56318	4.81184e-15	7.46508e-12	83.5443	TP53 (39.26 %) ATM ( 7.98 %) PRKDC ( 4.29 %) MDM2 ( 1.23 %) CDC25A ( 1.23 %) BRCA1 ( 0.61 %) CHEK1 ( 0.61 %) ATR ( 0.61 %) RPS6KA1 ( 0.61 %)	0.0251735	0.0497133	0.0736353	0.0969551	0.0251735	0.51026	0.534607	0.705888	0.429309	0.399453	0.225051	0.0736353	0.620476	0.0736353	0.600622	0.522589	0.18451	0.141848	0.0736353	0.119688	0.443675	0.0497133	0.0736353	0.0969551	0.18451	0.205039	0.351717	0.205039	0.244559	0.119688	0.119688	0.0736353	0.18451	0.119688	0.119688	0.18451	0.0497133	0.443675	0.225051	0.300186
AP1 PATHWAY	70	326723	21.5996	73	0.528876	4.81184e-15	7.46508e-12	83.5616	TP53 (39.26 %) CDKN2A ( 5.52 %) PTEN ( 2.45 %) MYC ( 1.23 %) MYB ( 1.23 %) FOS ( 1.23 %) CTNNB1 ( 1.23 %) ETS1 ( 0.61 %) JUNB ( 0.61 %)	0.0251735	0.0497133	0.0736353	0.0969551	0.0251735	0.51026	0.534607	0.705888	0.429309	0.399453	0.225051	0.0736353	0.620476	0.0736353	0.600622	0.522589	0.18451	0.141848	0.0736353	0.119688	0.443675	0.0497133	0.0736353	0.0969551	0.18451	0.205039	0.351717	0.205039	0.244559	0.119688	0.119688	0.0736353	0.18451	0.119688	0.119688	0.18451	0.0497133	0.443675	0.225051	0.300186
VEGF SIGNALING PATHWAY	76	448190	36.0407	79	0.340834	4.82974e-15	7.46508e-12	79.7468	KRAS (36.81 %) KDR ( 4.91 %) PIK3CG ( 3.07 %) PRKCG ( 2.45 %) NRAS ( 1.84 %) PRKCB ( 1.23 %) PTK2 ( 1.23 %) AKT1 ( 1.23 %) PIK3CD ( 1.23 %) PLCG2 ( 1.23 %) PIK3R2 ( 1.23 %) RAF1 ( 0.61 %) AKT3 ( 0.61 %) HRAS ( 0.61 %) SRC ( 0.61 %) PIK3CA ( 0.61 %) PLCG1 ( 0.61 %)	0.0470174	0.0918242	0.134524	0.175217	0.0470174	0.740356	0.764197	0.900899	0.653367	0.61832	0.382197	0.134524	0.839591	0.134524	0.823372	0.752563	0.319732	0.250952	0.134524	0.213996	0.669665	0.0918242	0.134524	0.175217	0.319732	0.351717	0.558994	0.351717	0.411245	0.213996	0.213996	0.134524	0.319732	0.213996	0.213996	0.319732	0.0918242	0.669665	0.382197	0.490447
P53HYPOXIA PATHWAY	23	170737	15.1752	80	0.721955	4.93687e-15	7.46508e-12	93.75	TP53 (39.26 %) ATM ( 7.98 %) MDM2 ( 1.23 %) AKT1 ( 1.23 %) MAPK8 ( 0.61 %) BAX ( 0.61 %)	0.0168535	0.033423	0.0497133	0.0657289	0.0168535	0.378687	0.399453	0.557743	0.31198	0.288189	0.156311	0.0497133	0.475805	0.0497133	0.457679	0.389159	0.127138	0.0969551	0.0497133	0.0814747	0.323576	0.033423	0.0497133	0.0657289	0.127138	0.141848	0.250952	0.141848	0.17053	0.0814747	0.0814747	0.0497133	0.127138	0.0814747	0.0814747	0.127138	0.033423	0.323576	0.156311	0.211766
P53 PATHWAY	16	96733	15.1752	80	0.721955	4.93687e-15	7.46508e-12	87.5	TP53 (39.26 %) ATM ( 7.98 %) RB1 ( 4.29 %) MDM2 ( 1.23 %) BAX ( 0.61 %) CCNE1 ( 0.61 %)	0.0168535	0.033423	0.0497133	0.0657289	0.0168535	0.378687	0.399453	0.557743	0.31198	0.288189	0.156311	0.0497133	0.475805	0.0497133	0.457679	0.389159	0.127138	0.0969551	0.0497133	0.0814747	0.323576	0.033423	0.0497133	0.0657289	0.127138	0.141848	0.250952	0.141848	0.17053	0.0814747	0.0814747	0.0497133	0.127138	0.0814747	0.0814747	0.127138	0.033423	0.323576	0.156311	0.211766
CTCF PATHWAY	23	156326	23.6024	73	0.490367	4.95766e-15	7.46508e-12	76.7123	TP53 (39.26 %) CDKN2A ( 5.52 %) PIK3CG ( 3.07 %) PTEN ( 2.45 %) MDM2 ( 1.23 %) SMAD4 ( 1.23 %) MYC ( 1.23 %) PIK3CA ( 0.61 %) TGFBR2 ( 0.61 %) TGFBR1 ( 0.61 %)	0.0279311	0.0550821	0.0814747	0.10713	0.0279311	0.547606	0.572525	0.743281	0.46379	0.432533	0.246696	0.0814747	0.659209	0.0814747	0.639344	0.560242	0.202783	0.156311	0.0814747	0.132069	0.478767	0.0550821	0.0814747	0.10713	0.202783	0.225051	0.382197	0.225051	0.267736	0.132069	0.132069	0.0814747	0.202783	0.132069	0.132069	0.202783	0.0550821	0.478767	0.246696	0.327397
CXCR3 PATHWAY	43	281065	23.6024	69	0.465893	4.95766e-15	7.46508e-12	91.3043	KRAS (36.81 %) NRAS ( 1.84 %) PIK3CD ( 1.23 %) PIK3R2 ( 1.23 %) AKT1 ( 1.23 %) MAP2K6 ( 0.61 %) RAF1 ( 0.61 %) PIK3CA ( 0.61 %) SRC ( 0.61 %) HRAS ( 0.61 %)	0.0279311	0.0550821	0.0814747	0.10713	0.0279311	0.547606	0.572525	0.743281	0.46379	0.432533	0.246696	0.0814747	0.659209	0.0814747	0.639344	0.560242	0.202783	0.156311	0.0814747	0.132069	0.478767	0.0550821	0.0814747	0.10713	0.202783	0.225051	0.382197	0.225051	0.267736	0.132069	0.132069	0.0814747	0.202783	0.132069	0.132069	0.202783	0.0550821	0.478767	0.246696	0.327397
FACTORS INVOLVED IN MEGAKARYOCYTE DEVELOPMENT AND PLATELET PRODUCTION	132	649746	23.6024	70	0.472142	4.95766e-15	7.46508e-12	84.2857	TP53 (39.26 %) DOCK3 ( 3.07 %) JAK2 ( 3.07 %) PRKACB ( 1.84 %) ABL1 ( 1.23 %) GATA1 ( 1.23 %) MYB ( 1.23 %) CDK5 ( 0.61 %) PRKACA ( 0.61 %) PRKAR1A ( 0.61 %)	0.0279311	0.0550821	0.0814747	0.10713	0.0279311	0.547606	0.572525	0.743281	0.46379	0.432533	0.246696	0.0814747	0.659209	0.0814747	0.639344	0.560242	0.202783	0.156311	0.0814747	0.132069	0.478767	0.0550821	0.0814747	0.10713	0.202783	0.225051	0.382197	0.225051	0.267736	0.132069	0.132069	0.0814747	0.202783	0.132069	0.132069	0.202783	0.0550821	0.478767	0.246696	0.327397
SIGNALLING TO RAS	27	150057	23.6024	68	0.459553	4.97453e-15	7.46508e-12	86.7647	KRAS (36.81 %) NTRK1 ( 4.29 %) NRAS ( 1.84 %) HRAS ( 0.61 %) SHC3 ( 0.61 %) RAF1 ( 0.61 %) RALA ( 0.61 %) RALB ( 0.61 %) SHC1 ( 0.61 %) SRC ( 0.61 %)	0.0279311	0.0550821	0.0814747	0.10713	0.0279311	0.547606	0.572525	0.743281	0.46379	0.432533	0.246696	0.0814747	0.659209	0.0814747	0.639344	0.560242	0.202783	0.156311	0.0814747	0.132069	0.478767	0.0550821	0.0814747	0.10713	0.202783	0.225051	0.382197	0.225051	0.267736	0.132069	0.132069	0.0814747	0.202783	0.132069	0.132069	0.202783	0.0550821	0.478767	0.246696	0.327397
GAP JUNCTION	90	613404	37.6251	104	0.441556	5.00518e-15	7.46508e-12	76.9231	KRAS (36.81 %) EGFR (18.40 %) GNAS ( 4.29 %) PDGFRA ( 3.68 %) PRKCG ( 2.45 %) PDGFRB ( 1.84 %) NRAS ( 1.84 %) PRKACB ( 1.84 %) PRKCB ( 1.23 %) MAP2K5 ( 1.23 %) MAP3K2 ( 1.23 %) RAF1 ( 0.61 %) MAPK7 ( 0.61 %) PRKG1 ( 0.61 %) HRAS ( 0.61 %) PRKX ( 0.61 %) SRC ( 0.61 %) PRKACA ( 0.61 %)	0.0497133	0.0969551	0.141848	0.18451	0.0497133	0.760155	0.783409	0.913498	0.674311	0.639344	0.399453	0.141848	0.855962	0.141848	0.840497	0.772078	0.334976	0.263576	0.141848	0.225051	0.690502	0.0969551	0.141848	0.18451	0.334976	0.368036	0.579729	0.368036	0.429309	0.225051	0.225051	0.141848	0.334976	0.225051	0.225051	0.334976	0.0969551	0.690502	0.399453	0.51026
GNRH SIGNALING PATHWAY	101	640617	37.6251	104	0.441556	5.00518e-15	7.46508e-12	81.7308	KRAS (36.81 %) EGFR (18.40 %) GNAS ( 4.29 %) MAP3K3 ( 1.84 %) MAP3K4 ( 1.84 %) NRAS ( 1.84 %) PRKACB ( 1.84 %) MAP3K2 ( 1.23 %) PRKCB ( 1.23 %) PRKX ( 0.61 %) PRKACA ( 0.61 %) RAF1 ( 0.61 %) PRKCD ( 0.61 %) MAP2K6 ( 0.61 %) MAPK7 ( 0.61 %) HRAS ( 0.61 %) MAPK8 ( 0.61 %) SRC ( 0.61 %)	0.0497133	0.0969551	0.141848	0.18451	0.0497133	0.760155	0.783409	0.913498	0.674311	0.639344	0.399453	0.141848	0.855962	0.141848	0.840497	0.772078	0.334976	0.263576	0.141848	0.225051	0.690502	0.0969551	0.141848	0.18451	0.334976	0.368036	0.579729	0.368036	0.429309	0.225051	0.225051	0.141848	0.334976	0.225051	0.225051	0.334976	0.0969551	0.690502	0.399453	0.51026
AMYOTROPHIC LATERAL SCLEROSIS ALS	53	324500	8.02798	65	0.908307	5.02669e-15	7.46508e-12	95.3846	TP53 (39.26 %) BAX ( 0.61 %) MAP2K6 ( 0.61 %)	0.00846257	0.0168535	0.0251735	0.033423	0.00846257	0.211766	0.225051	0.334976	0.17053	0.156311	0.0814747	0.0251735	0.275987	0.0251735	0.263576	0.218437	0.0657289	0.0497133	0.0251735	0.0416027	0.17755	0.0168535	0.0251735	0.033423	0.0657289	0.0736353	0.134524	0.0736353	0.0892478	0.0416027	0.0416027	0.0251735	0.0657289	0.0416027	0.0416027	0.0657289	0.0168535	0.17755	0.0814747	0.112175
HUNTINGTONS DISEASE	185	898185	8.02798	66	0.914937	5.02669e-15	7.46508e-12	96.9697	TP53 (39.26 %) BAX ( 0.61 %) HTT ( 0.61 %)	0.00846257	0.0168535	0.0251735	0.033423	0.00846257	0.211766	0.225051	0.334976	0.17053	0.156311	0.0814747	0.0251735	0.275987	0.0251735	0.263576	0.218437	0.0657289	0.0497133	0.0251735	0.0416027	0.17755	0.0168535	0.0251735	0.033423	0.0657289	0.0736353	0.134524	0.0736353	0.0892478	0.0416027	0.0416027	0.0251735	0.0657289	0.0416027	0.0416027	0.0657289	0.0168535	0.17755	0.0814747	0.112175
PML PATHWAY	17	116868	8.02798	67	0.921468	5.02669e-15	7.46508e-12	91.0448	TP53 (39.26 %) RB1 ( 4.29 %) HRAS ( 0.61 %)	0.00846257	0.0168535	0.0251735	0.033423	0.00846257	0.211766	0.225051	0.334976	0.17053	0.156311	0.0814747	0.0251735	0.275987	0.0251735	0.263576	0.218437	0.0657289	0.0497133	0.0251735	0.0416027	0.17755	0.0168535	0.0251735	0.033423	0.0657289	0.0736353	0.134524	0.0736353	0.0892478	0.0416027	0.0416027	0.0251735	0.0657289	0.0416027	0.0416027	0.0657289	0.0168535	0.17755	0.0814747	0.112175
G1 AND S PHASES	15	66529	8.02798	68	0.927902	5.02669e-15	7.46508e-12	88.2353	TP53 (39.3 %) CDKN2A ( 5.5 %) MDM2 ( 1.2 %)	0.00846257	0.0168535	0.0251735	0.033423	0.00846257	0.211766	0.225051	0.334976	0.17053	0.156311	0.0814747	0.0251735	0.275987	0.0251735	0.263576	0.218437	0.0657289	0.0497133	0.0251735	0.0416027	0.17755	0.0168535	0.0251735	0.033423	0.0657289	0.0736353	0.134524	0.0736353	0.0892478	0.0416027	0.0416027	0.0251735	0.0657289	0.0416027	0.0416027	0.0657289	0.0168535	0.17755	0.0814747	0.112175
HDAC CLASSIII PATHWAY	25	148732	8.02798	65	0.908307	5.02669e-15	7.46508e-12	93.8462	TP53 (39.26 %) FOXO3 ( 1.23 %) BAX ( 0.61 %)	0.00846257	0.0168535	0.0251735	0.033423	0.00846257	0.211766	0.225051	0.334976	0.17053	0.156311	0.0814747	0.0251735	0.275987	0.0251735	0.263576	0.218437	0.0657289	0.0497133	0.0251735	0.0416027	0.17755	0.0168535	0.0251735	0.033423	0.0657289	0.0736353	0.134524	0.0736353	0.0892478	0.0416027	0.0416027	0.0251735	0.0657289	0.0416027	0.0416027	0.0657289	0.0168535	0.17755	0.0814747	0.112175
HIF1A PATHWAY	19	111536	8.02798	66	0.914937	5.02669e-15	7.46508e-12	86.3636	TP53 (39.26 %) CDKN2A ( 5.52 %) VHL ( 0.61 %)	0.00846257	0.0168535	0.0251735	0.033423	0.00846257	0.211766	0.225051	0.334976	0.17053	0.156311	0.0814747	0.0251735	0.275987	0.0251735	0.263576	0.218437	0.0657289	0.0497133	0.0251735	0.0416027	0.17755	0.0168535	0.0251735	0.033423	0.0657289	0.0736353	0.134524	0.0736353	0.0892478	0.0416027	0.0416027	0.0251735	0.0657289	0.0416027	0.0416027	0.0657289	0.0168535	0.17755	0.0814747	0.112175
P38 ALPHA BETA DOWNSTREAM PATHWAY	38	266877	8.02798	64	0.901574	5.03311e-15	7.46508e-12	93.75	TP53 (39.26 %) MKNK1 ( 1.23 %) RPS6KA4 ( 0.61 %)	0.00846257	0.0168535	0.0251735	0.033423	0.00846257	0.211766	0.225051	0.334976	0.17053	0.156311	0.0814747	0.0251735	0.275987	0.0251735	0.263576	0.218437	0.0657289	0.0497133	0.0251735	0.0416027	0.17755	0.0168535	0.0251735	0.033423	0.0657289	0.0736353	0.134524	0.0736353	0.0892478	0.0416027	0.0416027	0.0251735	0.0657289	0.0416027	0.0416027	0.0657289	0.0168535	0.17755	0.0814747	0.112175
TIE2 SIGNALING	17	96628	21.5996	67	0.491628	5.05612e-15	7.46508e-12	89.5522	KRAS (36.81 %) NRAS ( 1.84 %) GRB7 ( 1.23 %) PIK3R2 ( 1.23 %) TEK ( 1.23 %) GRB14 ( 0.61 %) HRAS ( 0.61 %) PIK3CA ( 0.61 %) SHC1 ( 0.61 %)	0.0251735	0.0497133	0.0736353	0.0969551	0.0251735	0.51026	0.534607	0.705888	0.429309	0.399453	0.225051	0.0736353	0.620476	0.0736353	0.600622	0.522589	0.18451	0.141848	0.0736353	0.119688	0.443675	0.0497133	0.0736353	0.0969551	0.18451	0.205039	0.351717	0.205039	0.244559	0.119688	0.119688	0.0736353	0.18451	0.119688	0.119688	0.18451	0.0497133	0.443675	0.225051	0.300186
SIGNALING BY ERBB4	90	583839	39.1683	107	0.436449	5.12038e-15	7.46508e-12	78.5047	KRAS (36.81 %) EGFR (18.40 %) ERBB4 ( 4.91 %) JAK2 ( 3.07 %) PTEN ( 2.45 %) ERBB3 ( 1.84 %) NRAS ( 1.84 %) TSC2 ( 1.84 %) AKT1 ( 1.23 %) FOXO3 ( 1.23 %) MDM2 ( 1.23 %) STAT5B ( 1.23 %) AKT3 ( 0.61 %) GSK3A ( 0.61 %) HRAS ( 0.61 %) PIK3CA ( 0.61 %) RAF1 ( 0.61 %) SHC1 ( 0.61 %) STAT5A ( 0.61 %)	0.0524015	0.102057	0.149111	0.193698	0.0524015	0.778444	0.801056	0.924496	0.69399	0.659209	0.416227	0.149111	0.870662	0.149111	0.855962	0.790054	0.349878	0.275987	0.149111	0.23595	0.710025	0.102057	0.149111	0.193698	0.349878	0.383945	0.599489	0.383945	0.446818	0.23595	0.23595	0.149111	0.349878	0.23595	0.23595	0.349878	0.102057	0.710025	0.416227	0.529303
RNA PATHWAY	10	56101	5.45893	64	1.06907	5.20005e-15	7.46508e-12	96.875	TP53 (39.26 %) RELA ( 0.61 %)	0.0056497	0.0112675	0.0168535	0.022408	0.0056497	0.146697	0.156311	0.238111	0.117191	0.10713	0.0550821	0.0168535	0.193698	0.0168535	0.18451	0.151518	0.0443139	0.033423	0.0168535	0.0279311	0.122178	0.0112675	0.0168535	0.022408	0.0443139	0.0497133	0.0918242	0.0497133	0.0604206	0.0279311	0.0279311	0.0168535	0.0443139	0.0279311	0.0279311	0.0443139	0.0112675	0.122178	0.0550821	0.0762558
CD8 TCR PATHWAY	53	338487	31.0188	75	0.383436	5.2558e-15	7.46508e-12	90.6667	KRAS (36.81 %) FYN ( 1.84 %) NRAS ( 1.84 %) PRKCE ( 1.84 %) VAV1 ( 1.23 %) AKT1 ( 1.23 %) PRKCB ( 1.23 %) ZAP70 ( 0.61 %) PLCG1 ( 0.61 %) IKBKB ( 0.61 %) LCK ( 0.61 %) SHC1 ( 0.61 %) HRAS ( 0.61 %) PRKCQ ( 0.61 %)	0.0388839	0.0762558	0.112175	0.146697	0.0388839	0.6706	0.695718	0.850981	0.582103	0.547606	0.327397	0.112175	0.778444	0.112175	0.760155	0.683408	0.271873	0.211766	0.112175	0.179876	0.598353	0.0762558	0.112175	0.146697	0.271873	0.300186	0.490447	0.300186	0.353551	0.179876	0.179876	0.112175	0.271873	0.179876	0.179876	0.271873	0.0762558	0.598353	0.327397	0.426066
APOPTOSIS	148	893576	31.0188	76	0.389189	5.2558e-15	7.46508e-12	81.5789	TP53 (39.26 %) APC ( 6.75 %) TFDP1 ( 2.45 %) CTNNB1 ( 1.23 %) AKT1 ( 1.23 %) PTK2 ( 1.23 %) PRKCD ( 0.61 %) PRKCQ ( 0.61 %) MAPK8 ( 0.61 %) BAX ( 0.61 %) ROCK1 ( 0.61 %) BMX ( 0.61 %) STK24 ( 0.61 %) RIPK1 ( 0.61 %)	0.0388839	0.0762558	0.112175	0.146697	0.0388839	0.6706	0.695718	0.850981	0.582103	0.547606	0.327397	0.112175	0.778444	0.112175	0.760155	0.683408	0.271873	0.211766	0.112175	0.179876	0.598353	0.0762558	0.112175	0.146697	0.271873	0.300186	0.490447	0.300186	0.353551	0.179876	0.179876	0.112175	0.271873	0.179876	0.179876	0.271873	0.0762558	0.598353	0.327397	0.426066
CHEMICAL PATHWAY	22	159135	15.1752	77	0.705356	5.25777e-15	7.46508e-12	89.6104	TP53 (39.26 %) ATM ( 7.98 %) PTK2 ( 1.23 %) PRKCB ( 1.23 %) AKT1 ( 1.23 %) BAX ( 0.61 %)	0.0168535	0.033423	0.0497133	0.0657289	0.0168535	0.378687	0.399453	0.557743	0.31198	0.288189	0.156311	0.0497133	0.475805	0.0497133	0.457679	0.389159	0.127138	0.0969551	0.0497133	0.0814747	0.323576	0.033423	0.0497133	0.0657289	0.127138	0.141848	0.250952	0.141848	0.17053	0.0814747	0.0814747	0.0497133	0.127138	0.0814747	0.0814747	0.127138	0.033423	0.323576	0.156311	0.211766
ATRBRCA PATHWAY	21	147523	15.1752	77	0.705356	5.25777e-15	7.46508e-12	89.6104	TP53 (39.26 %) ATM ( 7.98 %) BRCA2 ( 1.23 %) BRCA1 ( 0.61 %) CHEK1 ( 0.61 %) ATR ( 0.61 %)	0.0168535	0.033423	0.0497133	0.0657289	0.0168535	0.378687	0.399453	0.557743	0.31198	0.288189	0.156311	0.0497133	0.475805	0.0497133	0.457679	0.389159	0.127138	0.0969551	0.0497133	0.0814747	0.323576	0.033423	0.0497133	0.0657289	0.127138	0.141848	0.250952	0.141848	0.17053	0.0814747	0.0814747	0.0497133	0.127138	0.0814747	0.0814747	0.127138	0.033423	0.323576	0.156311	0.211766
REG GR PATHWAY	82	463528	29.2474	69	0.372762	5.31075e-15	7.46508e-12	85.5072	TP53 (39.26 %) PRKACB ( 1.84 %) AKT1 ( 1.23 %) STAT5B ( 1.23 %) GSK3B ( 1.23 %) MDM2 ( 1.23 %) FOS ( 1.23 %) BAX ( 0.61 %) MAPK8 ( 0.61 %) RELA ( 0.61 %) STAT5A ( 0.61 %) PRKACA ( 0.61 %) CDK5 ( 0.61 %)	0.0361573	0.0710073	0.104597	0.136973	0.0361573	0.643407	0.668728	0.829276	0.55523	0.521234	0.308071	0.104597	0.753263	0.104597	0.734404	0.656301	0.255184	0.198254	0.104597	0.168177	0.571312	0.0710073	0.104597	0.136973	0.255184	0.282114	0.465307	0.282114	0.333089	0.168177	0.168177	0.104597	0.255184	0.168177	0.168177	0.255184	0.0710073	0.571312	0.308071	0.402846
TIGHT JUNCTION	134	894460	37.6251	82	0.338336	5.38878e-15	7.46508e-12	89.0244	KRAS (36.81 %) PRKCG ( 2.45 %) PTEN ( 2.45 %) NRAS ( 1.84 %) PRKCE ( 1.84 %) AKT1 ( 1.23 %) YES1 ( 1.23 %) PRKCB ( 1.23 %) CTNNB1 ( 1.23 %) AKT3 ( 0.61 %) CASK ( 0.61 %) PRKCI ( 0.61 %) PRKCH ( 0.61 %) PRKCD ( 0.61 %) PRKCQ ( 0.61 %) HRAS ( 0.61 %) MRAS ( 0.61 %) SRC ( 0.61 %)	0.0497133	0.0969551	0.141848	0.18451	0.0497133	0.760155	0.783409	0.913498	0.674311	0.639344	0.399453	0.141848	0.855962	0.141848	0.840497	0.772078	0.334976	0.263576	0.141848	0.225051	0.690502	0.0969551	0.141848	0.18451	0.334976	0.368036	0.579729	0.368036	0.429309	0.225051	0.225051	0.141848	0.334976	0.225051	0.225051	0.334976	0.0969551	0.690502	0.399453	0.51026
TID PATHWAY	19	110657	15.1752	69	0.657714	5.44144e-15	7.46508e-12	86.9565	TP53 (39.26 %) RB1 ( 4.29 %) JAK2 ( 3.07 %) RELA ( 0.61 %) IKBKB ( 0.61 %) WT1 ( 0.61 %)	0.0168535	0.033423	0.0497133	0.0657289	0.0168535	0.378687	0.399453	0.557743	0.31198	0.288189	0.156311	0.0497133	0.475805	0.0497133	0.457679	0.389159	0.127138	0.0969551	0.0497133	0.0814747	0.323576	0.033423	0.0497133	0.0657289	0.127138	0.141848	0.250952	0.141848	0.17053	0.0814747	0.0814747	0.0497133	0.127138	0.0814747	0.0814747	0.127138	0.033423	0.323576	0.156311	0.211766
SHC1 EVENTS IN ERBB4 SIGNALING	20	121090	15.1752	70	0.663963	5.44144e-15	7.46508e-12	91.4286	KRAS (36.81 %) ERBB4 ( 4.91 %) NRAS ( 1.84 %) HRAS ( 0.61 %) RAF1 ( 0.61 %) SHC1 ( 0.61 %)	0.0168535	0.033423	0.0497133	0.0657289	0.0168535	0.378687	0.399453	0.557743	0.31198	0.288189	0.156311	0.0497133	0.475805	0.0497133	0.457679	0.389159	0.127138	0.0969551	0.0497133	0.0814747	0.323576	0.033423	0.0497133	0.0657289	0.127138	0.141848	0.250952	0.141848	0.17053	0.0814747	0.0814747	0.0497133	0.127138	0.0814747	0.0814747	0.127138	0.033423	0.323576	0.156311	0.211766
SIGNALLING TO P38 VIA RIT AND RIN	15	78443	15.1752	69	0.657714	5.44144e-15	7.46508e-12	91.3043	KRAS (36.81 %) NTRK1 ( 4.29 %) NRAS ( 1.84 %) BRAF ( 1.84 %) HRAS ( 0.61 %) RAF1 ( 0.61 %)	0.0168535	0.033423	0.0497133	0.0657289	0.0168535	0.378687	0.399453	0.557743	0.31198	0.288189	0.156311	0.0497133	0.475805	0.0497133	0.457679	0.389159	0.127138	0.0969551	0.0497133	0.0814747	0.323576	0.033423	0.0497133	0.0657289	0.127138	0.141848	0.250952	0.141848	0.17053	0.0814747	0.0814747	0.0497133	0.127138	0.0814747	0.0814747	0.127138	0.033423	0.323576	0.156311	0.211766
P38MAPK EVENTS	13	68562	15.1752	65	0.631779	5.44453e-15	7.46508e-12	95.3846	KRAS (36.81 %) NRAS ( 1.84 %) HRAS ( 0.61 %) RALA ( 0.61 %) RALB ( 0.61 %) SRC ( 0.61 %)	0.0168535	0.033423	0.0497133	0.0657289	0.0168535	0.378687	0.399453	0.557743	0.31198	0.288189	0.156311	0.0497133	0.475805	0.0497133	0.457679	0.389159	0.127138	0.0969551	0.0497133	0.0814747	0.323576	0.033423	0.0497133	0.0657289	0.127138	0.141848	0.250952	0.141848	0.17053	0.0814747	0.0814747	0.0497133	0.127138	0.0814747	0.0814747	0.127138	0.033423	0.323576	0.156311	0.211766
SHC MEDIATED SIGNALLING	15	89697	15.1752	65	0.631779	5.44453e-15	7.46508e-12	95.3846	KRAS (36.81 %) NRAS ( 1.84 %) HRAS ( 0.61 %) SHC3 ( 0.61 %) RAF1 ( 0.61 %) SHC1 ( 0.61 %)	0.0168535	0.033423	0.0497133	0.0657289	0.0168535	0.378687	0.399453	0.557743	0.31198	0.288189	0.156311	0.0497133	0.475805	0.0497133	0.457679	0.389159	0.127138	0.0969551	0.0497133	0.0814747	0.323576	0.033423	0.0497133	0.0657289	0.127138	0.141848	0.250952	0.141848	0.17053	0.0814747	0.0814747	0.0497133	0.127138	0.0814747	0.0814747	0.127138	0.033423	0.323576	0.156311	0.211766
CD8 TCR DOWNSTREAM PATHWAY	65	285620	25.5423	72	0.450073	5.49035e-15	7.46508e-12	90.2778	KRAS (36.81 %) NRAS ( 1.84 %) BRAF ( 1.84 %) PRKCE ( 1.84 %) FOS ( 1.23 %) PRKCB ( 1.23 %) PRKCQ ( 0.61 %) RAF1 ( 0.61 %) HRAS ( 0.61 %) JUNB ( 0.61 %) MAPK8 ( 0.61 %)	0.030681	0.0604206	0.0892478	0.117191	0.030681	0.582103	0.607353	0.77592	0.496188	0.46379	0.267736	0.0892478	0.69399	0.0892478	0.674311	0.594925	0.220647	0.17053	0.0892478	0.144276	0.511646	0.0604206	0.0892478	0.117191	0.220647	0.244559	0.411245	0.244559	0.290203	0.144276	0.144276	0.0892478	0.220647	0.144276	0.144276	0.220647	0.0604206	0.511646	0.267736	0.353551
SIGNALING BY FGFR MUTANTS	44	291711	25.5423	72	0.450073	5.49035e-15	7.46508e-12	86.1111	KRAS (36.81 %) FGFR4 ( 4.29 %) FGFR1 ( 1.84 %) FGFR2 ( 1.84 %) NRAS ( 1.84 %) STAT5B ( 1.23 %) HRAS ( 0.61 %) PIK3CA ( 0.61 %) PLCG1 ( 0.61 %) STAT3 ( 0.61 %) STAT5A ( 0.61 %)	0.030681	0.0604206	0.0892478	0.117191	0.030681	0.582103	0.607353	0.77592	0.496188	0.46379	0.267736	0.0892478	0.69399	0.0892478	0.674311	0.594925	0.220647	0.17053	0.0892478	0.144276	0.511646	0.0604206	0.0892478	0.117191	0.220647	0.244559	0.411245	0.244559	0.290203	0.144276	0.144276	0.0892478	0.220647	0.144276	0.144276	0.220647	0.0604206	0.511646	0.267736	0.353551
P53 DEPENDENT G1 DNA DAMAGE RESPONSE	57	287609	10.4996	79	0.876455	5.58975e-15	7.46508e-12	94.9367	TP53 (39.26 %) ATM ( 7.98 %) MDM2 ( 1.23 %) CCNE1 ( 0.61 %)	0.0112675	0.022408	0.033423	0.0443139	0.0112675	0.271873	0.288189	0.419525	0.220647	0.202783	0.10713	0.033423	0.349878	0.033423	0.334976	0.280078	0.0866641	0.0657289	0.033423	0.0550821	0.229429	0.022408	0.033423	0.0443139	0.0866641	0.0969551	0.175217	0.0969551	0.117191	0.0550821	0.0550821	0.033423	0.0866641	0.0550821	0.0550821	0.0866641	0.022408	0.229429	0.10713	0.146697
DEVELOPMENTAL BIOLOGY	396	2873068	66.4695	116	0.241836	5.6059e-15	7.46508e-12	70.6897	KRAS (36.81 %) EGFR (18.40 %) ROBO2 ( 3.07 %) PAK7 ( 2.45 %) ROBO1 ( 2.45 %) CDH4 ( 1.84 %) PAK4 ( 1.84 %) ERBB2 ( 1.84 %) FGFR1 ( 1.84 %) FYN ( 1.84 %) MET ( 1.84 %) NRAS ( 1.84 %) CTNNB1 ( 1.23 %) AKT1 ( 1.23 %) FES ( 1.23 %) FOXO3 ( 1.23 %) ABL1 ( 1.23 %) CNTN6 ( 1.23 %) RPS6KA6 ( 1.23 %) SMAD4 ( 1.23 %) PAK6 ( 1.23 %) PTK2 ( 1.23 %) ACVR1B ( 1.23 %) AKT3 ( 0.61 %) RANBP9 ( 0.61 %) CDK5 ( 0.61…	0.112175	0.211766	0.300186	0.378687	0.112175	0.964259	0.971827	0.996691	0.92702	0.907413	0.695718	0.300186	0.989125	0.300186	0.986203	0.968268	0.61397	0.51026	0.300186	0.448383	0.935206	0.211766	0.300186	0.378687	0.61397	0.657273	0.867697	0.657273	0.729851	0.448383	0.448383	0.300186	0.61397	0.448383	0.448383	0.61397	0.211766	0.935206	0.695718	0.810946
P75 NTR PATHWAY	69	352114	25.5423	71	0.443998	5.61707e-15	7.46508e-12	84.507	TP53 (39.26 %) NTRK1 ( 4.29 %) PRKACB ( 1.84 %) AKT1 ( 1.23 %) IRAK1 ( 1.23 %) PIK3CA ( 0.61 %) MAPK8 ( 0.61 %) PRKCI ( 0.61 %) IKBKB ( 0.61 %) RHOB ( 0.61 %) SHC1 ( 0.61 %)	0.030681	0.0604206	0.0892478	0.117191	0.030681	0.582103	0.607353	0.77592	0.496188	0.46379	0.267736	0.0892478	0.69399	0.0892478	0.674311	0.594925	0.220647	0.17053	0.0892478	0.144276	0.511646	0.0604206	0.0892478	0.117191	0.220647	0.244559	0.411245	0.244559	0.290203	0.144276	0.144276	0.0892478	0.220647	0.144276	0.144276	0.220647	0.0604206	0.511646	0.267736	0.353551
SIGNALING BY NOTCH	103	716093	25.5423	66	0.412284	5.6769e-15	7.4699e-12	77.2727	TP53 (39.26 %) TFDP1 ( 2.45 %) JAG2 ( 1.84 %) NOTCH4 ( 1.84 %) MAML1 ( 1.84 %) MYC ( 1.23 %) NOTCH3 ( 1.23 %) FBXW7 ( 1.23 %) JAG1 ( 0.61 %) NOTCH2 ( 0.61 %) MAML2 ( 0.61 %)	0.030681	0.0604206	0.0892478	0.117191	0.030681	0.582103	0.607353	0.77592	0.496188	0.46379	0.267736	0.0892478	0.69399	0.0892478	0.674311	0.594925	0.220647	0.17053	0.0892478	0.144276	0.511646	0.0604206	0.0892478	0.117191	0.220647	0.244559	0.411245	0.244559	0.290203	0.144276	0.144276	0.0892478	0.220647	0.144276	0.144276	0.220647	0.0604206	0.511646	0.267736	0.353551
RB PATHWAY	13	88660	10.4996	76	0.859642	5.78312e-15	7.53507e-12	85.5263	TP53 (39.26 %) ATM ( 7.98 %) RB1 ( 4.29 %) CHEK1 ( 0.61 %)	0.0112675	0.022408	0.033423	0.0443139	0.0112675	0.271873	0.288189	0.419525	0.220647	0.202783	0.10713	0.033423	0.349878	0.033423	0.334976	0.280078	0.0866641	0.0657289	0.033423	0.0550821	0.229429	0.022408	0.033423	0.0443139	0.0866641	0.0969551	0.175217	0.0969551	0.117191	0.0550821	0.0550821	0.033423	0.0866641	0.0550821	0.0550821	0.0866641	0.022408	0.229429	0.10713	0.146697
EGFR SMRTE PATHWAY	11	88983	2.78547	30	1.03222	5.94721e-15	7.59985e-12	86.6667	EGFR (18 %)	0.00282885	0.0056497	0.00846257	0.0112675	0.00282885	0.0762558	0.0814747	0.127138	0.0604206	0.0550821	0.0279311	0.00846257	0.102057	0.00846257	0.0969551	0.078869	0.022408	0.0168535	0.00846257	0.0140645	0.0630785	0.0056497	0.00846257	0.0112675	0.022408	0.0251735	0.0470174	0.0251735	0.030681	0.0140645	0.0140645	0.00846257	0.022408	0.0140645	0.0140645	0.022408	0.0056497	0.0630785	0.0279311	0.0388839
EGFR DOWNREGULATION	25	167661	2.78547	30	1.03222	5.94721e-15	7.59985e-12	86.6667	EGFR (18 %)	0.00282885	0.0056497	0.00846257	0.0112675	0.00282885	0.0762558	0.0814747	0.127138	0.0604206	0.0550821	0.0279311	0.00846257	0.102057	0.00846257	0.0969551	0.078869	0.022408	0.0168535	0.00846257	0.0140645	0.0630785	0.0056497	0.00846257	0.0112675	0.022408	0.0251735	0.0470174	0.0251735	0.030681	0.0140645	0.0140645	0.00846257	0.022408	0.0140645	0.0140645	0.022408	0.0056497	0.0630785	0.0279311	0.0388839
ACTIVATED AMPK STIMULATES FATTY ACID OXIDATION IN MUSCLE	19	108056	5.45893	35	0.806961	6.1166e-15	7.74187e-12	100	STK11 (20.86 %) STRADB ( 0.61 %)	0.0056497	0.0112675	0.0168535	0.022408	0.0056497	0.146697	0.156311	0.238111	0.117191	0.10713	0.0550821	0.0168535	0.193698	0.0168535	0.18451	0.151518	0.0443139	0.033423	0.0168535	0.0279311	0.122178	0.0112675	0.0168535	0.022408	0.0443139	0.0497133	0.0918242	0.0497133	0.0604206	0.0279311	0.0279311	0.0168535	0.0443139	0.0279311	0.0279311	0.0443139	0.0112675	0.122178	0.0550821	0.0762558
APOPTOSIS	88	494084	39.1683	85	0.336485	6.23493e-15	7.8171e-12	77.6471	TP53 (39.26 %) ATM ( 7.98 %) NTRK1 ( 4.29 %) PIK3CG ( 3.07 %) IRAK2 ( 1.84 %) PRKACB ( 1.84 %) AKT1 ( 1.23 %) IRAK1 ( 1.23 %) PIK3CD ( 1.23 %) PIK3R2 ( 1.23 %) RIPK1 ( 0.61 %) BAX ( 0.61 %) IKBKB ( 0.61 %) AKT3 ( 0.61 %) RELA ( 0.61 %) PRKX ( 0.61 %) PRKACA ( 0.61 %) PIK3CA ( 0.61 %) PRKAR1A ( 0.61 %)	0.0524015	0.102057	0.149111	0.193698	0.0524015	0.778444	0.801056	0.924496	0.69399	0.659209	0.416227	0.149111	0.870662	0.149111	0.855962	0.790054	0.349878	0.275987	0.149111	0.23595	0.710025	0.102057	0.149111	0.193698	0.349878	0.383945	0.599489	0.383945	0.446818	0.23595	0.23595	0.149111	0.349878	0.23595	0.23595	0.349878	0.102057	0.710025	0.416227	0.529303
TRKR PATHWAY	62	449065	34.413	78	0.355373	6.29401e-15	7.8171e-12	75.641	KRAS (36.81 %) NTRK3 ( 4.29 %) NTRK1 ( 4.29 %) NTRK2 ( 3.68 %) PTPN11 ( 1.84 %) NRAS ( 1.84 %) ABL1 ( 1.23 %) HRAS ( 0.61 %) RAPGEF1 ( 0.61 %) PLCG1 ( 0.61 %) SHC3 ( 0.61 %) PRKCI ( 0.61 %) STAT3 ( 0.61 %) PIK3CA ( 0.61 %) SHC1 ( 0.61 %) MATK ( 0.61 %)	0.0443139	0.0866641	0.127138	0.165818	0.0443139	0.718922	0.743281	0.886464	0.631077	0.596071	0.364446	0.127138	0.821359	0.127138	0.804409	0.731377	0.30414	0.238111	0.127138	0.202783	0.647425	0.0866641	0.127138	0.165818	0.30414	0.334976	0.537236	0.334976	0.39261	0.202783	0.202783	0.127138	0.30414	0.202783	0.202783	0.30414	0.0866641	0.647425	0.364446	0.469832
RAF MAP KINASE CASCADE	10	57316	10.4996	65	0.791741	6.41131e-15	7.8171e-12	98.4615	KRAS (36.81 %) NRAS ( 1.84 %) HRAS ( 0.61 %) RAF1 ( 0.61 %)	0.0112675	0.022408	0.033423	0.0443139	0.0112675	0.271873	0.288189	0.419525	0.220647	0.202783	0.10713	0.033423	0.349878	0.033423	0.334976	0.280078	0.0866641	0.0657289	0.033423	0.0550821	0.229429	0.022408	0.033423	0.0443139	0.0866641	0.0969551	0.175217	0.0969551	0.117191	0.0550821	0.0550821	0.033423	0.0866641	0.0550821	0.0550821	0.0866641	0.022408	0.229429	0.10713	0.146697
ACTIVATION OF BH3 ONLY PROTEINS	17	88108	10.4996	65	0.791741	6.41131e-15	7.8171e-12	89.2308	TP53 (39.26 %) TFDP1 ( 2.45 %) AKT1 ( 1.23 %) MAPK8 ( 0.61 %)	0.0112675	0.022408	0.033423	0.0443139	0.0112675	0.271873	0.288189	0.419525	0.220647	0.202783	0.10713	0.033423	0.349878	0.033423	0.334976	0.280078	0.0866641	0.0657289	0.033423	0.0550821	0.229429	0.022408	0.033423	0.0443139	0.0866641	0.0969551	0.175217	0.0969551	0.117191	0.0550821	0.0550821	0.033423	0.0866641	0.0550821	0.0550821	0.0866641	0.022408	0.229429	0.10713	0.146697
COLORECTAL CANCER	62	445335	44.9649	113	0.400205	6.51465e-15	7.87088e-12	61.0619	TP53 (39.26 %) KRAS (36.81 %) APC ( 6.75 %) PIK3CG ( 3.07 %) MSH6 ( 2.45 %) BRAF ( 1.84 %) AKT1 ( 1.23 %) SMAD4 ( 1.23 %) MYC ( 1.23 %) GSK3B ( 1.23 %) CTNNB1 ( 1.23 %) PIK3CD ( 1.23 %) FOS ( 1.23 %) PIK3R2 ( 1.23 %) RAF1 ( 0.61 %) BAX ( 0.61 %) AKT3 ( 0.61 %) SMAD2 ( 0.61 %) MAPK8 ( 0.61 %) ARAF ( 0.61 %) TGFBR2 ( 0.61 %) TGFBR1 ( 0.61 %) PIK3CA ( 0.61 %)	0.0630785	0.122178	0.17755	0.229429	0.0630785	0.83868	0.858389	0.956172	0.76151	0.728316	0.478767	0.17755	0.915914	0.17755	0.904211	0.848855	0.40622	0.323576	0.17755	0.278035	0.776554	0.122178	0.17755	0.229429	0.40622	0.443675	0.669665	0.443675	0.511646	0.278035	0.278035	0.17755	0.40622	0.278035	0.278035	0.40622	0.122178	0.776554	0.478767	0.598353
WNT SIGNALING PATHWAY	151	961307	32.7398	76	0.365738	6.61408e-15	7.91902e-12	73.6842	TP53 (39.26 %) APC ( 6.75 %) PRKCG ( 2.45 %) PRKACB ( 1.84 %) MYC ( 1.23 %) PRKCB ( 1.23 %) SMAD4 ( 1.23 %) GSK3B ( 1.23 %) CTNNB1 ( 1.23 %) ROCK1 ( 0.61 %) PRKX ( 0.61 %) NLK ( 0.61 %) PRKACA ( 0.61 %) SMAD2 ( 0.61 %) MAPK8 ( 0.61 %)	0.0416027	0.0814747	0.119688	0.156311	0.0416027	0.695718	0.72051	0.869927	0.607353	0.572525	0.346184	0.119688	0.801056	0.119688	0.783409	0.708377	0.288189	0.225051	0.119688	0.191411	0.623688	0.0814747	0.119688	0.156311	0.288189	0.317803	0.514405	0.317803	0.373384	0.191411	0.191411	0.119688	0.288189	0.191411	0.191411	0.288189	0.0814747	0.623688	0.346184	0.448383
ERBB1 DOWNSTREAM PATHWAY	105	714682	44.9649	106	0.372432	6.75807e-15	8.01918e-12	82.0755	KRAS (36.81 %) EGFR (18.40 %) NRAS ( 1.84 %) BRAF ( 1.84 %) AKT1 ( 1.23 %) PIK3R2 ( 1.23 %) MAP2K5 ( 1.23 %) KSR1 ( 1.23 %) PIK3CD ( 1.23 %) MAP3K2 ( 1.23 %) VAV2 ( 1.23 %) FOS ( 1.23 %) RIN1 ( 0.61 %) HRAS ( 0.61 %) MAPK7 ( 0.61 %) PRKCD ( 0.61 %) RPS6KA4 ( 0.61 %) MAPK8 ( 0.61 %) PIK3CA ( 0.61 %) RALA ( 0.61 %) SRC ( 0.61 %) STAT3 ( 0.61 %) RAF1 ( 0.61 %)	0.0630785	0.122178	0.17755	0.229429	0.0630785	0.83868	0.858389	0.956172	0.76151	0.728316	0.478767	0.17755	0.915914	0.17755	0.904211	0.848855	0.40622	0.323576	0.17755	0.278035	0.776554	0.122178	0.17755	0.229429	0.40622	0.443675	0.669665	0.443675	0.511646	0.278035	0.278035	0.17755	0.40622	0.278035	0.278035	0.40622	0.122178	0.776554	0.478767	0.598353
CHRONIC MYELOID LEUKEMIA	73	499821	53.8871	115	0.329213	7.04756e-15	8.28868e-12	60	TP53 (39.26 %) KRAS (36.81 %) CDKN2A ( 5.52 %) RB1 ( 4.29 %) PIK3CG ( 3.07 %) PTPN11 ( 1.84 %) BRAF ( 1.84 %) NRAS ( 1.84 %) MDM2 ( 1.23 %) ABL1 ( 1.23 %) AKT1 ( 1.23 %) STAT5B ( 1.23 %) SMAD4 ( 1.23 %) MYC ( 1.23 %) CBLB ( 1.23 %) PIK3CD ( 1.23 %) PIK3R2 ( 1.23 %) RAF1 ( 0.61 %) SHC1 ( 0.61 %) MECOM ( 0.61 %) IKBKB ( 0.61 %) AKT3 ( 0.61 %) STAT5A ( 0.61 %) HRAS ( 0.61 %) RELA ( 0.61 %) SHC3 ( 0.…	0.0814747	0.156311	0.225051	0.288189	0.0814747	0.907413	0.921885	0.983081	0.845828	0.817265	0.572525	0.225051	0.960421	0.225051	0.953088	0.914956	0.493326	0.399453	0.225051	0.346184	0.858389	0.156311	0.225051	0.288189	0.493326	0.534607	0.764197	0.534607	0.607353	0.346184	0.346184	0.225051	0.493326	0.346184	0.346184	0.493326	0.156311	0.858389	0.572525	0.695718
PI3KCI PATHWAY	49	321592	39.1683	81	0.315551	7.14783e-15	8.33286e-12	82.716	KRAS (36.81 %) PIK3CG ( 3.07 %) PTEN ( 2.45 %) FYN ( 1.84 %) HCK ( 1.84 %) ITK ( 1.84 %) NRAS ( 1.84 %) YES1 ( 1.23 %) PLCG2 ( 1.23 %) PIK3R2 ( 1.23 %) PIK3CD ( 1.23 %) FOXO3 ( 1.23 %) LCK ( 0.61 %) SYK ( 0.61 %) PIK3CA ( 0.61 %) HRAS ( 0.61 %) SRC ( 0.61 %) ZAP70 ( 0.61 %) PLCG1 ( 0.61 %)	0.0524015	0.102057	0.149111	0.193698	0.0524015	0.778444	0.801056	0.924496	0.69399	0.659209	0.416227	0.149111	0.870662	0.149111	0.855962	0.790054	0.349878	0.275987	0.149111	0.23595	0.710025	0.102057	0.149111	0.193698	0.349878	0.383945	0.599489	0.383945	0.446818	0.23595	0.23595	0.149111	0.349878	0.23595	0.23595	0.349878	0.102057	0.710025	0.416227	0.529303
TCR PATHWAY	66	441832	37.6251	79	0.32215	7.28175e-15	8.37567e-12	81.0127	KRAS (36.81 %) PTEN ( 2.45 %) NRAS ( 1.84 %) FYN ( 1.84 %) PTPN11 ( 1.84 %) ITK ( 1.84 %) PRKCE ( 1.84 %) MAP4K1 ( 1.84 %) AKT1 ( 1.23 %) PRKCB ( 1.23 %) VAV1 ( 1.23 %) SHC1 ( 0.61 %) HRAS ( 0.61 %) IKBKB ( 0.61 %) ZAP70 ( 0.61 %) PLCG1 ( 0.61 %) LCK ( 0.61 %) PRKCQ ( 0.61 %)	0.0497133	0.0969551	0.141848	0.18451	0.0497133	0.760155	0.783409	0.913498	0.674311	0.639344	0.399453	0.141848	0.855962	0.141848	0.840497	0.772078	0.334976	0.263576	0.141848	0.225051	0.690502	0.0969551	0.141848	0.18451	0.334976	0.368036	0.579729	0.368036	0.429309	0.225051	0.225051	0.141848	0.334976	0.225051	0.225051	0.334976	0.0969551	0.690502	0.399453	0.51026
REGULATION OF ACTIN CYTOSKELETON	216	1414290	51.4779	111	0.333703	7.46736e-15	8.37567e-12	63.964	KRAS (36.81 %) EGFR (18.40 %) APC ( 6.75 %) FGFR4 ( 4.29 %) PDGFRA ( 3.68 %) INSRR ( 3.68 %) PAK3 ( 3.07 %) PIK3CG ( 3.07 %) PAK7 ( 2.45 %) NRAS ( 1.84 %) FGFR2 ( 1.84 %) FGFR1 ( 1.84 %) PAK4 ( 1.84 %) PDGFRB ( 1.84 %) BRAF ( 1.84 %) PTK2 ( 1.23 %) PAK6 ( 1.23 %) VAV3 ( 1.23 %) VAV1 ( 1.23 %) VAV2 ( 1.23 %) PIK3CD ( 1.23 %) PIK3R2 ( 1.23 %) ROCK1 ( 0.61 %) HRAS ( 0.61 %) RAF1 ( 0.61 %) ARAF ( 0.6…	0.0762558	0.146697	0.211766	0.271873	0.0762558	0.891495	0.907413	0.977793	0.825362	0.795339	0.547606	0.211766	0.950913	0.211766	0.942474	0.89977	0.469832	0.378687	0.211766	0.327397	0.83868	0.146697	0.211766	0.271873	0.469832	0.51026	0.740356	0.51026	0.582103	0.327397	0.327397	0.211766	0.469832	0.327397	0.327397	0.469832	0.146697	0.83868	0.547606	0.6706
REGULATION OF AMPK ACTIVITY VIA LKB1	15	92466	8.02798	36	0.651696	7.47959e-15	8.37567e-12	97.2222	STK11 (20.86 %) RPTOR ( 1.23 %) STRADB ( 0.61 %)	0.00846257	0.0168535	0.0251735	0.033423	0.00846257	0.211766	0.225051	0.334976	0.17053	0.156311	0.0814747	0.0251735	0.275987	0.0251735	0.263576	0.218437	0.0657289	0.0497133	0.0251735	0.0416027	0.17755	0.0168535	0.0251735	0.033423	0.0657289	0.0736353	0.134524	0.0736353	0.0892478	0.0416027	0.0416027	0.0251735	0.0657289	0.0416027	0.0416027	0.0657289	0.0168535	0.17755	0.0814747	0.112175
INSULIN RECEPTOR SIGNALLING CASCADE	87	532551	40.6721	97	0.377475	7.49966e-15	8.37567e-12	69.0722	KRAS (36.81 %) STK11 (20.86 %) FGFR4 ( 4.29 %) PIK3C3 ( 3.07 %) FGFR1 ( 1.84 %) FGFR2 ( 1.84 %) INSR ( 1.84 %) IRS1 ( 1.84 %) NRAS ( 1.84 %) TSC2 ( 1.84 %) EIF4G1 ( 1.23 %) PIK3R2 ( 1.23 %) RPTOR ( 1.23 %) TSC1 ( 1.23 %) HRAS ( 0.61 %) PIK3CA ( 0.61 %) SHC3 ( 0.61 %) STRADB ( 0.61 %) RAF1 ( 0.61 %) SHC1 ( 0.61 %)	0.0550821	0.10713	0.156311	0.202783	0.0550821	0.795339	0.817265	0.934095	0.712479	0.677981	0.432533	0.156311	0.883862	0.156311	0.869927	0.806613	0.364446	0.288189	0.156311	0.246696	0.728316	0.10713	0.156311	0.202783	0.364446	0.399453	0.61832	0.399453	0.46379	0.246696	0.246696	0.156311	0.364446	0.246696	0.246696	0.364446	0.10713	0.728316	0.432533	0.547606
SIGNALING BY INSULIN RECEPTOR	108	629963	40.6721	97	0.377475	7.49966e-15	8.37567e-12	69.0722	KRAS (36.81 %) STK11 (20.86 %) FGFR4 ( 4.29 %) PIK3C3 ( 3.07 %) FGFR1 ( 1.84 %) FGFR2 ( 1.84 %) INSR ( 1.84 %) IRS1 ( 1.84 %) NRAS ( 1.84 %) TSC2 ( 1.84 %) EIF4G1 ( 1.23 %) PIK3R2 ( 1.23 %) RPTOR ( 1.23 %) TSC1 ( 1.23 %) HRAS ( 0.61 %) PIK3CA ( 0.61 %) SHC3 ( 0.61 %) STRADB ( 0.61 %) RAF1 ( 0.61 %) SHC1 ( 0.61 %)	0.0550821	0.10713	0.156311	0.202783	0.0550821	0.795339	0.817265	0.934095	0.712479	0.677981	0.432533	0.156311	0.883862	0.156311	0.869927	0.806613	0.364446	0.288189	0.156311	0.246696	0.728316	0.10713	0.156311	0.202783	0.364446	0.399453	0.61832	0.399453	0.46379	0.246696	0.246696	0.156311	0.364446	0.246696	0.246696	0.364446	0.10713	0.728316	0.432533	0.547606
CELL CYCLE	128	734945	44.9649	90	0.301369	7.64683e-15	8.46886e-12	64.4444	TP53 (39.26 %) ATM ( 7.98 %) CDKN2A ( 5.52 %) RB1 ( 4.29 %) PRKDC ( 4.29 %) RBL1 ( 2.45 %) TFDP1 ( 2.45 %) MDM2 ( 1.23 %) ABL1 ( 1.23 %) RBL2 ( 1.23 %) MYC ( 1.23 %) CDC25A ( 1.23 %) SMAD4 ( 1.23 %) GSK3B ( 1.23 %) ATR ( 0.61 %) BUB1 ( 0.61 %) CHEK1 ( 0.61 %) CCNE1 ( 0.61 %) SMAD2 ( 0.61 %) CDKN2B ( 0.61 %) CDKN2C ( 0.61 %) CDK7 ( 0.61 %) CCNB3 ( 0.61 %)	0.0630785	0.122178	0.17755	0.229429	0.0630785	0.83868	0.858389	0.956172	0.76151	0.728316	0.478767	0.17755	0.915914	0.17755	0.904211	0.848855	0.40622	0.323576	0.17755	0.278035	0.776554	0.122178	0.17755	0.229429	0.40622	0.443675	0.669665	0.443675	0.511646	0.278035	0.278035	0.17755	0.40622	0.278035	0.278035	0.40622	0.122178	0.776554	0.478767	0.598353
NEUROTROPHIN SIGNALING PATHWAY	126	847063	63.5892	116	0.261075	8.01206e-15	8.7873e-12	55.1724	TP53 (39.26 %) KRAS (36.81 %) NTRK1 ( 4.29 %) NTRK3 ( 4.29 %) NTRK2 ( 3.68 %) PIK3CG ( 3.07 %) BRAF ( 1.84 %) MAP3K3 ( 1.84 %) NRAS ( 1.84 %) PTPN11 ( 1.84 %) IRAK2 ( 1.84 %) IRS1 ( 1.84 %) RPS6KA6 ( 1.23 %) ABL1 ( 1.23 %) AKT1 ( 1.23 %) FOXO3 ( 1.23 %) PLCG2 ( 1.23 %) MAP2K5 ( 1.23 %) GSK3B ( 1.23 %) IRAK1 ( 1.23 %) PIK3CD ( 1.23 %) PIK3R2 ( 1.23 %) TP73 ( 0.61 %) IKBKB ( 0.61 %) AKT3 ( 0.61 %) …	0.104597	0.198254	0.282114	0.357203	0.104597	0.954656	0.963646	0.995024	0.912016	0.890259	0.668728	0.282114	0.984979	0.282114	0.981265	0.959399	0.586812	0.48464	0.282114	0.424438	0.921218	0.198254	0.282114	0.357203	0.586812	0.63003	0.847133	0.63003	0.703378	0.424438	0.424438	0.282114	0.586812	0.424438	0.424438	0.586812	0.198254	0.921218	0.668728	0.787059
CELL CYCLE	421	2112375	44.9649	88	0.291609	8.0666e-15	8.7873e-12	65.9091	TP53 (39.26 %) ATM ( 7.98 %) CDKN2A ( 5.52 %) RB1 ( 4.29 %) TERT ( 3.07 %) RBL1 ( 2.45 %) TFDP1 ( 2.45 %) MDM2 ( 1.23 %) MYBL2 ( 1.23 %) MYC ( 1.23 %) RBL2 ( 1.23 %) CDC25A ( 1.23 %) CDK7 ( 0.61 %) CDKN2B ( 0.61 %) CDKN2C ( 0.61 %) CHEK1 ( 0.61 %) ATR ( 0.61 %) PRKACA ( 0.61 %) BRCA1 ( 0.61 %) AURKA ( 0.61 %) BUB1 ( 0.61 %) CCNE1 ( 0.61 %) AURKB ( 0.61 %)	0.0630785	0.122178	0.17755	0.229429	0.0630785	0.83868	0.858389	0.956172	0.76151	0.728316	0.478767	0.17755	0.915914	0.17755	0.904211	0.848855	0.40622	0.323576	0.17755	0.278035	0.776554	0.122178	0.17755	0.229429	0.40622	0.443675	0.669665	0.443675	0.511646	0.278035	0.278035	0.17755	0.40622	0.278035	0.278035	0.40622	0.122178	0.776554	0.478767	0.598353
CELL SURFACE INTERACTIONS AT THE VASCULAR WALL	91	463551	32.7398	73	0.348247	8.25069e-15	8.83248e-12	83.5616	KRAS (36.81 %) MERTK ( 3.07 %) FYN ( 1.84 %) NRAS ( 1.84 %) GRB7 ( 1.23 %) PIK3R2 ( 1.23 %) TEK ( 1.23 %) YES1 ( 1.23 %) GRB14 ( 0.61 %) HRAS ( 0.61 %) LCK ( 0.61 %) PIK3CA ( 0.61 %) PLCG1 ( 0.61 %) SHC1 ( 0.61 %) SRC ( 0.61 %)	0.0416027	0.0814747	0.119688	0.156311	0.0416027	0.695718	0.72051	0.869927	0.607353	0.572525	0.346184	0.119688	0.801056	0.119688	0.783409	0.708377	0.288189	0.225051	0.119688	0.191411	0.623688	0.0814747	0.119688	0.156311	0.288189	0.317803	0.514405	0.317803	0.373384	0.191411	0.191411	0.119688	0.288189	0.191411	0.191411	0.288189	0.0814747	0.623688	0.346184	0.448383
IL 2 SIGNALING	41	220156	32.7398	73	0.348247	8.25069e-15	8.83248e-12	83.5616	KRAS (36.81 %) JAK2 ( 3.07 %) JAK3 ( 1.84 %) NRAS ( 1.84 %) JAK1 ( 1.23 %) PIK3CD ( 1.23 %) PIK3R2 ( 1.23 %) STAT5B ( 1.23 %) HRAS ( 0.61 %) LCK ( 0.61 %) PIK3CA ( 0.61 %) RAF1 ( 0.61 %) SHC1 ( 0.61 %) STAT5A ( 0.61 %) SYK ( 0.61 %)	0.0416027	0.0814747	0.119688	0.156311	0.0416027	0.695718	0.72051	0.869927	0.607353	0.572525	0.346184	0.119688	0.801056	0.119688	0.783409	0.708377	0.288189	0.225051	0.119688	0.191411	0.623688	0.0814747	0.119688	0.156311	0.288189	0.317803	0.514405	0.317803	0.373384	0.191411	0.191411	0.119688	0.288189	0.191411	0.191411	0.288189	0.0814747	0.623688	0.346184	0.448383
HEMOSTASIS	466	2579600	68.3051	115	0.226244	8.30745e-15	8.83248e-12	55.6522	TP53 (39.26 %) KRAS (36.81 %) GNAS ( 4.29 %) MERTK ( 3.07 %) DOCK3 ( 3.07 %) JAK2 ( 3.07 %) PIK3CG ( 3.07 %) PRKCG ( 2.45 %) FYN ( 1.84 %) NRAS ( 1.84 %) PRKACB ( 1.84 %) PRKCE ( 1.84 %) VAV3 ( 1.23 %) AKT1 ( 1.23 %) ABL1 ( 1.23 %) GATA1 ( 1.23 %) GRB7 ( 1.23 %) MYB ( 1.23 %) PIK3R2 ( 1.23 %) PLCG2 ( 1.23 %) PRKCB ( 1.23 %) PTK2 ( 1.23 %) TEK ( 1.23 %) VAV1 ( 1.23 %) VEGFC ( 1.23 %) YES1 ( 1.23 %…	0.117191	0.220647	0.31198	0.39261	0.117191	0.969502	0.976231	0.997479	0.935572	0.917332	0.712479	0.31198	0.991231	0.31198	0.988748	0.973076	0.631077	0.526629	0.31198	0.46379	0.943123	0.220647	0.31198	0.39261	0.631077	0.674311	0.879846	0.674311	0.746174	0.46379	0.46379	0.31198	0.631077	0.46379	0.46379	0.631077	0.220647	0.943123	0.712479	0.825362
ERBB NETWORK PATHWAY	15	100451	10.4996	41	0.591612	9.75508e-15	1.02893e-11	82.9268	EGFR (18.4 %) ERBB4 ( 4.9 %) ERBB2 ( 1.8 %) ERBB3 ( 1.8 %)	0.0112675	0.022408	0.033423	0.0443139	0.0112675	0.271873	0.288189	0.419525	0.220647	0.202783	0.10713	0.033423	0.349878	0.033423	0.334976	0.280078	0.0866641	0.0657289	0.033423	0.0550821	0.229429	0.022408	0.033423	0.0443139	0.0866641	0.0969551	0.175217	0.0969551	0.117191	0.0550821	0.0550821	0.033423	0.0866641	0.0550821	0.0550821	0.0866641	0.022408	0.229429	0.10713	0.146697
SMALL CELL LUNG CANCER	84	626193	32.7398	72	0.342256	1.37064e-14	1.43432e-11	75	TP53 (39.26 %) RB1 ( 4.29 %) PIK3CG ( 3.07 %) PTEN ( 2.45 %) PTK2 ( 1.23 %) AKT1 ( 1.23 %) MYC ( 1.23 %) PIK3CD ( 1.23 %) PIK3R2 ( 1.23 %) IKBKB ( 0.61 %) AKT3 ( 0.61 %) RELA ( 0.61 %) CDKN2B ( 0.61 %) PIK3CA ( 0.61 %) CCNE1 ( 0.61 %)	0.0416027	0.0814747	0.119688	0.156311	0.0416027	0.695718	0.72051	0.869927	0.607353	0.572525	0.346184	0.119688	0.801056	0.119688	0.783409	0.708377	0.288189	0.225051	0.119688	0.191411	0.623688	0.0814747	0.119688	0.156311	0.288189	0.317803	0.514405	0.317803	0.373384	0.191411	0.191411	0.119688	0.288189	0.191411	0.191411	0.288189	0.0814747	0.623688	0.346184	0.448383
GMCSF PATHWAY	37	214158	34.413	74	0.33251	1.39819e-14	1.45171e-11	85.1351	KRAS (36.81 %) JAK2 ( 3.07 %) NRAS ( 1.84 %) PRKACB ( 1.84 %) PTPN11 ( 1.84 %) FOS ( 1.23 %) STAT5B ( 1.23 %) IKBKB ( 0.61 %) HRAS ( 0.61 %) STAT3 ( 0.61 %) PRKACA ( 0.61 %) RAF1 ( 0.61 %) SHC1 ( 0.61 %) STAT5A ( 0.61 %) PIK3CA ( 0.61 %) SYK ( 0.61 %)	0.0443139	0.0866641	0.127138	0.165818	0.0443139	0.718922	0.743281	0.886464	0.631077	0.596071	0.364446	0.127138	0.821359	0.127138	0.804409	0.731377	0.30414	0.238111	0.127138	0.202783	0.647425	0.0866641	0.127138	0.165818	0.30414	0.334976	0.537236	0.334976	0.39261	0.202783	0.202783	0.127138	0.30414	0.202783	0.202783	0.30414	0.0866641	0.647425	0.364446	0.469832
INTEGRATION OF ENERGY METABOLISM	120	734262	15.1752	47	0.490963	3.01757e-14	3.10879e-11	97.8723	STK11 (20.86 %) GNAS ( 4.29 %) PRKACB ( 1.84 %) CTNNB1 ( 1.23 %) PRKACA ( 0.61 %) PRKAR1A ( 0.61 %)	0.0168535	0.033423	0.0497133	0.0657289	0.0168535	0.378687	0.399453	0.557743	0.31198	0.288189	0.156311	0.0497133	0.475805	0.0497133	0.457679	0.389159	0.127138	0.0969551	0.0497133	0.0814747	0.323576	0.033423	0.0497133	0.0657289	0.127138	0.141848	0.250952	0.141848	0.17053	0.0814747	0.0814747	0.0497133	0.127138	0.0814747	0.0814747	0.127138	0.033423	0.323576	0.156311	0.211766
B CELL RECEPTOR SIGNALING PATHWAY	75	454656	40.6721	80	0.293793	6.42157e-14	6.56482e-11	87.5	KRAS (36.81 %) PIK3CG ( 3.07 %) NRAS ( 1.84 %) PRKCB ( 1.23 %) VAV1 ( 1.23 %) AKT1 ( 1.23 %) VAV2 ( 1.23 %) GSK3B ( 1.23 %) PIK3CD ( 1.23 %) PLCG2 ( 1.23 %) FOS ( 1.23 %) VAV3 ( 1.23 %) PIK3R2 ( 1.23 %) RAF1 ( 0.61 %) IKBKB ( 0.61 %) AKT3 ( 0.61 %) HRAS ( 0.61 %) RELA ( 0.61 %) SYK ( 0.61 %) PIK3CA ( 0.61 %)	0.0550821	0.10713	0.156311	0.202783	0.0550821	0.795339	0.817265	0.934095	0.712479	0.677981	0.432533	0.156311	0.883862	0.156311	0.869927	0.806613	0.364446	0.288189	0.156311	0.246696	0.728316	0.10713	0.156311	0.202783	0.364446	0.399453	0.61832	0.399453	0.46379	0.246696	0.246696	0.156311	0.364446	0.246696	0.246696	0.364446	0.10713	0.728316	0.432533	0.547606
SIGNALING BY THE B CELL RECEPTOR BCR	126	751747	42.1384	81	0.283807	1.53379e-13	1.55604e-10	81.4815	KRAS (36.81 %) PTEN ( 2.45 %) FYN ( 1.84 %) NRAS ( 1.84 %) TSC2 ( 1.84 %) AKT1 ( 1.23 %) FOXO3 ( 1.23 %) MDM2 ( 1.23 %) PIK3CD ( 1.23 %) PLCG2 ( 1.23 %) PRKCB ( 1.23 %) VAV1 ( 1.23 %) CBLB ( 1.23 %) AKT3 ( 0.61 %) GSK3A ( 0.61 %) HRAS ( 0.61 %) IKBKB ( 0.61 %) PLCG1 ( 0.61 %) RELA ( 0.61 %) SHC1 ( 0.61 %) SYK ( 0.61 %)	0.0577551	0.112175	0.163451	0.211766	0.0577551	0.810946	0.832153	0.942474	0.729851	0.695718	0.448383	0.163451	0.895715	0.163451	0.882538	0.821865	0.378687	0.300186	0.163451	0.257291	0.745454	0.112175	0.163451	0.211766	0.378687	0.414571	0.636266	0.414571	0.480241	0.257291	0.257291	0.163451	0.378687	0.257291	0.257291	0.378687	0.112175	0.745454	0.448383	0.565197
UPA UPAR PATHWAY	42	237610	8.02798	33	0.613907	3.89011e-13	3.91664e-10	84.8485	EGFR (18.40 %) PDGFRB ( 1.84 %) SRC ( 0.61 %)	0.00846257	0.0168535	0.0251735	0.033423	0.00846257	0.211766	0.225051	0.334976	0.17053	0.156311	0.0814747	0.0251735	0.275987	0.0251735	0.263576	0.218437	0.0657289	0.0497133	0.0251735	0.0416027	0.17755	0.0168535	0.0251735	0.033423	0.0657289	0.0736353	0.134524	0.0736353	0.0892478	0.0416027	0.0416027	0.0251735	0.0657289	0.0416027	0.0416027	0.0657289	0.0168535	0.17755	0.0814747	0.112175
ACUTE MYELOID LEUKEMIA	60	375010	42.1384	80	0.278412	5.67632e-13	5.62973e-10	87.5	KRAS (36.81 %) PIK3CG ( 3.07 %) BRAF ( 1.84 %) NRAS ( 1.84 %) JUP ( 1.23 %) AKT1 ( 1.23 %) STAT5B ( 1.23 %) MYC ( 1.23 %) PIK3CD ( 1.23 %) PIK3R2 ( 1.23 %) STAT3 ( 0.61 %) RAF1 ( 0.61 %) PIM2 ( 0.61 %) KIT ( 0.61 %) IKBKB ( 0.61 %) AKT3 ( 0.61 %) STAT5A ( 0.61 %) HRAS ( 0.61 %) RELA ( 0.61 %) ARAF ( 0.61 %) PIK3CA ( 0.61 %)	0.0577551	0.112175	0.163451	0.211766	0.0577551	0.810946	0.832153	0.942474	0.729851	0.695718	0.448383	0.163451	0.895715	0.163451	0.882538	0.821865	0.378687	0.300186	0.163451	0.257291	0.745454	0.112175	0.163451	0.211766	0.378687	0.414571	0.636266	0.414571	0.480241	0.257291	0.257291	0.163451	0.378687	0.257291	0.257291	0.378687	0.112175	0.745454	0.448383	0.565197
IL2 1PATHWAY	55	320047	42.1384	80	0.278412	5.67632e-13	5.62973e-10	82.5	KRAS (36.81 %) NRAS ( 1.84 %) PTPN11 ( 1.84 %) JAK3 ( 1.84 %) FYN ( 1.84 %) IRS1 ( 1.84 %) PRKCE ( 1.84 %) MYC ( 1.23 %) JAK1 ( 1.23 %) STAT5B ( 1.23 %) PRKCB ( 1.23 %) FOS ( 1.23 %) STAT3 ( 0.61 %) HRAS ( 0.61 %) PIK3CA ( 0.61 %) SYK ( 0.61 %) RAF1 ( 0.61 %) LCK ( 0.61 %) MAPK8 ( 0.61 %) STAT5A ( 0.61 %) SHC1 ( 0.61 %)	0.0577551	0.112175	0.163451	0.211766	0.0577551	0.810946	0.832153	0.942474	0.729851	0.695718	0.448383	0.163451	0.895715	0.163451	0.882538	0.821865	0.378687	0.300186	0.163451	0.257291	0.745454	0.112175	0.163451	0.211766	0.378687	0.414571	0.636266	0.414571	0.480241	0.257291	0.257291	0.163451	0.378687	0.257291	0.257291	0.378687	0.112175	0.745454	0.448383	0.565197
RENAL CELL CARCINOMA	70	465889	44.9649	83	0.266204	7.3547e-13	7.18706e-10	77.1084	KRAS (36.81 %) PAK3 ( 3.07 %) PIK3CG ( 3.07 %) PAK7 ( 2.45 %) PTPN11 ( 1.84 %) PAK4 ( 1.84 %) BRAF ( 1.84 %) NRAS ( 1.84 %) MET ( 1.84 %) AKT1 ( 1.23 %) PAK6 ( 1.23 %) FH ( 1.23 %) VEGFC ( 1.23 %) PIK3CD ( 1.23 %) PIK3R2 ( 1.23 %) RAF1 ( 0.61 %) RAPGEF1 ( 0.61 %) AKT3 ( 0.61 %) ETS1 ( 0.61 %) HRAS ( 0.61 %) ARAF ( 0.61 %) VHL ( 0.61 %) PIK3CA ( 0.61 %)	0.0630785	0.122178	0.17755	0.229429	0.0630785	0.83868	0.858389	0.956172	0.76151	0.728316	0.478767	0.17755	0.915914	0.17755	0.904211	0.848855	0.40622	0.323576	0.17755	0.278035	0.776554	0.122178	0.17755	0.229429	0.40622	0.443675	0.669665	0.443675	0.511646	0.278035	0.278035	0.17755	0.40622	0.278035	0.278035	0.40622	0.122178	0.776554	0.478767	0.598353
DOWNSTREAM SIGNALING OF ACTIVATED FGFR	100	653561	44.9649	83	0.266204	7.3547e-13	7.18706e-10	73.494	KRAS (36.81 %) FGFR4 ( 4.29 %) PRKCG ( 2.45 %) PTEN ( 2.45 %) FGFR1 ( 1.84 %) FGFR2 ( 1.84 %) NRAS ( 1.84 %) PRKACB ( 1.84 %) PRKCE ( 1.84 %) TSC2 ( 1.84 %) AKT1 ( 1.23 %) FOXO3 ( 1.23 %) MDM2 ( 1.23 %) AKT3 ( 0.61 %) GSK3A ( 0.61 %) HRAS ( 0.61 %) PIK3CA ( 0.61 %) PLCG1 ( 0.61 %) PRKACA ( 0.61 %) PRKAR1A ( 0.61 %) PRKCD ( 0.61 %) RAF1 ( 0.61 %) SHC1 ( 0.61 %)	0.0630785	0.122178	0.17755	0.229429	0.0630785	0.83868	0.858389	0.956172	0.76151	0.728316	0.478767	0.17755	0.915914	0.17755	0.904211	0.848855	0.40622	0.323576	0.17755	0.278035	0.776554	0.122178	0.17755	0.229429	0.40622	0.443675	0.669665	0.443675	0.511646	0.278035	0.278035	0.17755	0.40622	0.278035	0.278035	0.40622	0.122178	0.776554	0.478767	0.598353
FC EPSILON RI SIGNALING PATHWAY	79	462667	43.5689	81	0.269309	1.27617e-12	1.23798e-09	83.9506	KRAS (36.81 %) PIK3CG ( 3.07 %) PRKCE ( 1.84 %) NRAS ( 1.84 %) FYN ( 1.84 %) PRKCB ( 1.23 %) VAV1 ( 1.23 %) AKT1 ( 1.23 %) VAV2 ( 1.23 %) PIK3CD ( 1.23 %) PLCG2 ( 1.23 %) VAV3 ( 1.23 %) PIK3R2 ( 1.23 %) RAF1 ( 0.61 %) PRKCD ( 0.61 %) MAP2K6 ( 0.61 %) AKT3 ( 0.61 %) HRAS ( 0.61 %) MAPK8 ( 0.61 %) SYK ( 0.61 %) PIK3CA ( 0.61 %) PLCG1 ( 0.61 %)	0.0604206	0.117191	0.17053	0.220647	0.0604206	0.825362	0.845828	0.949788	0.746174	0.712479	0.46379	0.17053	0.906358	0.17053	0.893927	0.835914	0.39261	0.31198	0.17053	0.267736	0.76151	0.117191	0.17053	0.220647	0.39261	0.429309	0.653367	0.429309	0.496188	0.267736	0.267736	0.17053	0.39261	0.267736	0.267736	0.39261	0.117191	0.76151	0.46379	0.582103
TELOMERASE PATHWAY	68	454362	21.5996	53	0.389829	4.18521e-12	4.03054e-09	84.9057	EGFR (18.40 %) ATM ( 7.98 %) TERT ( 3.07 %) FOS ( 1.23 %) MYC ( 1.23 %) AKT1 ( 1.23 %) ABL1 ( 1.23 %) WT1 ( 0.61 %) PINX1 ( 0.61 %)	0.0251735	0.0497133	0.0736353	0.0969551	0.0251735	0.51026	0.534607	0.705888	0.429309	0.399453	0.225051	0.0736353	0.620476	0.0736353	0.600622	0.522589	0.18451	0.141848	0.0736353	0.119688	0.443675	0.0497133	0.0736353	0.0969551	0.18451	0.205039	0.351717	0.205039	0.244559	0.119688	0.119688	0.0736353	0.18451	0.119688	0.119688	0.18451	0.0497133	0.443675	0.225051	0.300186
SIGNALING BY FGFR	112	727359	48.9611	86	0.244647	4.51205e-12	4.31404e-09	72.093	KRAS (36.81 %) FGFR4 ( 4.29 %) PRKCG ( 2.45 %) PTEN ( 2.45 %) FGFR1 ( 1.84 %) FGFR2 ( 1.84 %) NRAS ( 1.84 %) PRKACB ( 1.84 %) PRKCE ( 1.84 %) BRAF ( 1.84 %) TSC2 ( 1.84 %) AKT1 ( 1.23 %) FOXO3 ( 1.23 %) MDM2 ( 1.23 %) MKNK1 ( 1.23 %) AKT3 ( 0.61 %) GSK3A ( 0.61 %) HRAS ( 0.61 %) PIK3CA ( 0.61 %) PLCG1 ( 0.61 %) PRKACA ( 0.61 %) PRKAR1A ( 0.61 %) PRKCD ( 0.61 %) RAF1 ( 0.61 %) SHC1 ( 0.61 %) SRC (…	0.0710073	0.136973	0.198254	0.255184	0.0710073	0.872842	0.890259	0.970853	0.80218	0.770783	0.521234	0.198254	0.939121	0.198254	0.929459	0.881871	0.445249	0.357203	0.198254	0.308071	0.816226	0.136973	0.198254	0.255184	0.445249	0.48464	0.714103	0.48464	0.55523	0.308071	0.308071	0.198254	0.445249	0.308071	0.308071	0.445249	0.136973	0.816226	0.521234	0.643407
AXON GUIDANCE	129	955429	52.6954	90	0.23247	4.7298e-12	4.48994e-09	63.3333	KRAS (36.81 %) EPHA3 ( 6.13 %) EPHA5 ( 4.29 %) EPHA7 ( 3.68 %) ROBO2 ( 3.07 %) PAK3 ( 3.07 %) EPHB6 ( 3.07 %) ROBO1 ( 2.45 %) PAK7 ( 2.45 %) EPHB1 ( 2.45 %) PAK4 ( 1.84 %) NRAS ( 1.84 %) MET ( 1.84 %) FYN ( 1.84 %) PTK2 ( 1.23 %) ABL1 ( 1.23 %) PAK6 ( 1.23 %) EPHB4 ( 1.23 %) SEMA3B ( 1.23 %) GSK3B ( 1.23 %) FES ( 1.23 %) ROCK1 ( 0.61 %) SEMA3F ( 0.61 %) HRAS ( 0.61 %) EPHA1 ( 0.61 %) EPHA2 ( 0.61…	0.078869	0.151518	0.218437	0.280078	0.078869	0.89977	0.914956	0.980617	0.835914	0.806613	0.560242	0.218437	0.955923	0.218437	0.948052	0.907675	0.481712	0.389159	0.218437	0.336857	0.848855	0.151518	0.218437	0.280078	0.481712	0.522589	0.752563	0.522589	0.594925	0.336857	0.336857	0.218437	0.481712	0.336857	0.336857	0.481712	0.151518	0.848855	0.560242	0.683408
ERBB2 ERBB3 PATHWAY	44	313221	39.1683	74	0.276297	1.54323e-11	1.45457e-08	78.3784	KRAS (36.81 %) JAK2 ( 3.07 %) ERBB2 ( 1.84 %) NRAS ( 1.84 %) PTPN11 ( 1.84 %) ERBB3 ( 1.84 %) FOS ( 1.23 %) AKT1 ( 1.23 %) PIK3CD ( 1.23 %) PIK3R2 ( 1.23 %) MAPK8 ( 0.61 %) SRC ( 0.61 %) HRAS ( 0.61 %) STAT3 ( 0.61 %) SHC1 ( 0.61 %) NF2 ( 0.61 %) RAF1 ( 0.61 %) PIK3CA ( 0.61 %) PRKACA ( 0.61 %)	0.0524015	0.102057	0.149111	0.193698	0.0524015	0.778444	0.801056	0.924496	0.69399	0.659209	0.416227	0.149111	0.870662	0.149111	0.855962	0.790054	0.349878	0.275987	0.149111	0.23595	0.710025	0.102057	0.149111	0.193698	0.349878	0.383945	0.599489	0.383945	0.446818	0.23595	0.23595	0.149111	0.349878	0.23595	0.23595	0.349878	0.102057	0.710025	0.416227	0.529303
NATURAL KILLER CELL MEDIATED CYTOTOXICITY	137	825264	46.3281	82	0.247969	1.77291e-11	1.6593e-08	78.0488	KRAS (36.81 %) PIK3CG ( 3.07 %) PRKCG ( 2.45 %) BRAF ( 1.84 %) NRAS ( 1.84 %) PTPN11 ( 1.84 %) FYN ( 1.84 %) VAV1 ( 1.23 %) VAV2 ( 1.23 %) PLCG2 ( 1.23 %) PRKCB ( 1.23 %) PIK3CD ( 1.23 %) VAV3 ( 1.23 %) PIK3R2 ( 1.23 %) ZAP70 ( 0.61 %) SHC3 ( 0.61 %) PLCG1 ( 0.61 %) LCK ( 0.61 %) RAF1 ( 0.61 %) SHC1 ( 0.61 %) HRAS ( 0.61 %) SYK ( 0.61 %) ARAF ( 0.61 %) PIK3CA ( 0.61 %)	0.0657289	0.127138	0.18451	0.238111	0.0657289	0.850981	0.869927	0.961744	0.77592	0.743281	0.493326	0.18451	0.924496	0.18451	0.913498	0.860776	0.419525	0.334976	0.18451	0.288189	0.790648	0.127138	0.18451	0.238111	0.419525	0.457679	0.685197	0.457679	0.526629	0.288189	0.288189	0.18451	0.419525	0.288189	0.288189	0.419525	0.127138	0.790648	0.493326	0.61397
ENERGY DEPENDENT REGULATION OF MTOR BY LKB1 AMPK	18	117033	12.8801	39	0.481147	2.24953e-11	2.09064e-08	92.3077	STK11 (20.86 %) TSC2 ( 1.84 %) RPTOR ( 1.23 %) TSC1 ( 1.23 %) STRADB ( 0.61 %)	0.0140645	0.0279311	0.0416027	0.0550821	0.0140645	0.327397	0.346184	0.493326	0.267736	0.246696	0.132069	0.0416027	0.416227	0.0416027	0.399453	0.336857	0.10713	0.0814747	0.0416027	0.0683719	0.278035	0.0279311	0.0416027	0.0550821	0.10713	0.119688	0.213996	0.119688	0.144276	0.0683719	0.0683719	0.0416027	0.10713	0.0683719	0.0683719	0.10713	0.0279311	0.278035	0.132069	0.179876
SYNDECAN 3 PATHWAY	17	88905	10.4996	35	0.522896	2.533e-11	2.33774e-08	88.5714	EGFR (18.40 %) FYN ( 1.84 %) SRC ( 0.61 %) CASK ( 0.61 %)	0.0112675	0.022408	0.033423	0.0443139	0.0112675	0.271873	0.288189	0.419525	0.220647	0.202783	0.10713	0.033423	0.349878	0.033423	0.334976	0.280078	0.0866641	0.0657289	0.033423	0.0550821	0.229429	0.022408	0.033423	0.0443139	0.0866641	0.0969551	0.175217	0.0969551	0.117191	0.0550821	0.0550821	0.033423	0.0866641	0.0550821	0.0550821	0.0866641	0.022408	0.229429	0.10713	0.146697
SIGNALING BY FGFR IN DISEASE	127	862703	52.6954	88	0.22271	5.44191e-11	4.98779e-08	72.7273	KRAS (36.81 %) FGFR4 ( 4.29 %) PRKCG ( 2.45 %) PTEN ( 2.45 %) FGFR1 ( 1.84 %) FGFR2 ( 1.84 %) NRAS ( 1.84 %) PRKACB ( 1.84 %) PRKCE ( 1.84 %) BRAF ( 1.84 %) TSC2 ( 1.84 %) AKT1 ( 1.23 %) FOXO3 ( 1.23 %) MDM2 ( 1.23 %) STAT5B ( 1.23 %) MKNK1 ( 1.23 %) AKT3 ( 0.61 %) GSK3A ( 0.61 %) HRAS ( 0.61 %) PIK3CA ( 0.61 %) PLCG1 ( 0.61 %) PRKACA ( 0.61 %) PRKAR1A ( 0.61 %) PRKCD ( 0.61 %) RAF1 ( 0.61 %) SHC…	0.078869	0.151518	0.218437	0.280078	0.078869	0.89977	0.914956	0.980617	0.835914	0.806613	0.560242	0.218437	0.955923	0.218437	0.948052	0.907675	0.481712	0.389159	0.218437	0.336857	0.848855	0.151518	0.218437	0.280078	0.481712	0.522589	0.752563	0.522589	0.594925	0.336857	0.336857	0.218437	0.481712	0.336857	0.336857	0.481712	0.151518	0.848855	0.560242	0.683408
SIGNALING BY SCF KIT	78	493486	51.4779	86	0.222878	1.23509e-10	1.12427e-07	77.907	KRAS (36.81 %) JAK2 ( 3.07 %) PTEN ( 2.45 %) FYN ( 1.84 %) NRAS ( 1.84 %) TEC ( 1.84 %) TSC2 ( 1.84 %) AKT1 ( 1.23 %) FES ( 1.23 %) FOXO3 ( 1.23 %) GRB7 ( 1.23 %) MDM2 ( 1.23 %) PIK3R2 ( 1.23 %) STAT5B ( 1.23 %) VAV1 ( 1.23 %) YES1 ( 1.23 %) AKT3 ( 0.61 %) CHEK1 ( 0.61 %) FER ( 0.61 %) GSK3A ( 0.61 %) HRAS ( 0.61 %) KIT ( 0.61 %) LCK ( 0.61 %) PIK3CA ( 0.61 %) RAF1 ( 0.61 %) SRC ( 0.61 %) STAT3 (…	0.0762558	0.146697	0.211766	0.271873	0.0762558	0.891495	0.907413	0.977793	0.825362	0.795339	0.547606	0.211766	0.950913	0.211766	0.942474	0.89977	0.469832	0.378687	0.211766	0.327397	0.83868	0.146697	0.211766	0.271873	0.469832	0.51026	0.740356	0.51026	0.582103	0.327397	0.327397	0.211766	0.469832	0.327397	0.327397	0.469832	0.146697	0.83868	0.547606	0.6706
PROGESTERONE MEDIATED OOCYTE MATURATION	86	600500	40.6721	74	0.259935	1.27349e-10	1.15134e-07	82.4324	KRAS (36.81 %) PIK3CG ( 3.07 %) BRAF ( 1.84 %) PRKACB ( 1.84 %) RPS6KA6 ( 1.23 %) IGF1R ( 1.23 %) AKT1 ( 1.23 %) PIK3CD ( 1.23 %) CDC25A ( 1.23 %) PIK3R2 ( 1.23 %) RAF1 ( 0.61 %) AKT3 ( 0.61 %) RPS6KA1 ( 0.61 %) MAPK8 ( 0.61 %) PRKX ( 0.61 %) ARAF ( 0.61 %) BUB1 ( 0.61 %) PRKACA ( 0.61 %) PIK3CA ( 0.61 %) CCNB3 ( 0.61 %)	0.0550821	0.10713	0.156311	0.202783	0.0550821	0.795339	0.817265	0.934095	0.712479	0.677981	0.432533	0.156311	0.883862	0.156311	0.869927	0.806613	0.364446	0.288189	0.156311	0.246696	0.728316	0.10713	0.156311	0.202783	0.364446	0.399453	0.61832	0.399453	0.46379	0.246696	0.246696	0.156311	0.364446	0.246696	0.246696	0.364446	0.10713	0.728316	0.432533	0.547606
PDGFRB PATHWAY	129	872913	57.3162	92	0.205511	1.53795e-10	1.38103e-07	72.8261	KRAS (36.81 %) PIK3CG ( 3.07 %) JAK2 ( 3.07 %) PTEN ( 2.45 %) HCK ( 1.84 %) FYN ( 1.84 %) PDGFRB ( 1.84 %) PTPN11 ( 1.84 %) BRAF ( 1.84 %) PRKCE ( 1.84 %) NRAS ( 1.84 %) FOS ( 1.23 %) STAT5B ( 1.23 %) YES1 ( 1.23 %) VAV2 ( 1.23 %) MYC ( 1.23 %) KSR1 ( 1.23 %) ABL1 ( 1.23 %) PIK3CD ( 1.23 %) PIK3R2 ( 1.23 %) RAPGEF1 ( 0.61 %) PRKCD ( 0.61 %) LCK ( 0.61 %) PIK3CA ( 0.61 %) RAF1 ( 0.61 %) PLCG1 ( 0.…	0.0892478	0.17053	0.244559	0.31198	0.0892478	0.92702	0.939465	0.988748	0.872119	0.845828	0.607353	0.244559	0.971344	0.244559	0.965453	0.933533	0.526629	0.429309	0.244559	0.373384	0.883532	0.17053	0.244559	0.31198	0.526629	0.568876	0.795918	0.568876	0.642396	0.373384	0.373384	0.244559	0.526629	0.373384	0.373384	0.526629	0.17053	0.883532	0.607353	0.729851
CBL PATHWAY	13	104089	15.1752	41	0.431649	2.13167e-10	1.88866e-07	80.4878	EGFR (18.40 %) PDGFRA ( 3.68 %) MET ( 1.84 %) CSF1R ( 1.23 %) PRKCB ( 1.23 %) SRC ( 0.61 %)	0.0168535	0.033423	0.0497133	0.0657289	0.0168535	0.378687	0.399453	0.557743	0.31198	0.288189	0.156311	0.0497133	0.475805	0.0497133	0.457679	0.389159	0.127138	0.0969551	0.0497133	0.0814747	0.323576	0.033423	0.0497133	0.0657289	0.127138	0.141848	0.250952	0.141848	0.17053	0.0814747	0.0814747	0.0497133	0.127138	0.0814747	0.0814747	0.127138	0.033423	0.323576	0.156311	0.211766
PKB MEDIATED EVENTS	29	208181	15.1752	41	0.431649	2.13167e-10	1.88866e-07	92.6829	STK11 (20.86 %) TSC2 ( 1.84 %) EIF4G1 ( 1.23 %) RPTOR ( 1.23 %) TSC1 ( 1.23 %) STRADB ( 0.61 %)	0.0168535	0.033423	0.0497133	0.0657289	0.0168535	0.378687	0.399453	0.557743	0.31198	0.288189	0.156311	0.0497133	0.475805	0.0497133	0.457679	0.389159	0.127138	0.0969551	0.0497133	0.0814747	0.323576	0.033423	0.0497133	0.0657289	0.127138	0.141848	0.250952	0.141848	0.17053	0.0814747	0.0814747	0.0497133	0.127138	0.0814747	0.0814747	0.127138	0.033423	0.323576	0.156311	0.211766
ARF6 PATHWAY	35	228476	12.8801	37	0.458284	4.31722e-10	3.79972e-07	86.4865	EGFR (18.40 %) TSHR ( 1.84 %) MET ( 1.84 %) SRC ( 0.61 %) EPHA2 ( 0.61 %)	0.0140645	0.0279311	0.0416027	0.0550821	0.0140645	0.327397	0.346184	0.493326	0.267736	0.246696	0.132069	0.0416027	0.416227	0.0416027	0.399453	0.336857	0.10713	0.0814747	0.0416027	0.0683719	0.278035	0.0279311	0.0416027	0.0550821	0.10713	0.119688	0.213996	0.119688	0.144276	0.0683719	0.0683719	0.0416027	0.10713	0.0683719	0.0683719	0.10713	0.0279311	0.278035	0.132069	0.179876
T CELL RECEPTOR SIGNALING PATHWAY	108	624987	52.6954	86	0.212726	5.53647e-10	4.84076e-07	74.4186	KRAS (36.81 %) PAK3 ( 3.07 %) PIK3CG ( 3.07 %) PAK7 ( 2.45 %) PAK4 ( 1.84 %) NRAS ( 1.84 %) TEC ( 1.84 %) ITK ( 1.84 %) FYN ( 1.84 %) VAV1 ( 1.23 %) AKT1 ( 1.23 %) VAV2 ( 1.23 %) PAK6 ( 1.23 %) GSK3B ( 1.23 %) CBLB ( 1.23 %) PIK3CD ( 1.23 %) FOS ( 1.23 %) VAV3 ( 1.23 %) PIK3R2 ( 1.23 %) ZAP70 ( 0.61 %) IKBKB ( 0.61 %) AKT3 ( 0.61 %) RELA ( 0.61 %) PLCG1 ( 0.61 %) LCK ( 0.61 %) RAF1 ( 0.61 %) PRKC…	0.078869	0.151518	0.218437	0.280078	0.078869	0.89977	0.914956	0.980617	0.835914	0.806613	0.560242	0.218437	0.955923	0.218437	0.948052	0.907675	0.481712	0.389159	0.218437	0.336857	0.848855	0.151518	0.218437	0.280078	0.481712	0.522589	0.752563	0.522589	0.594925	0.336857	0.336857	0.218437	0.481712	0.336857	0.336857	0.481712	0.151518	0.848855	0.560242	0.683408
ADRENERGIC	36	269498	19.5303	46	0.372048	1.10664e-09	9.61262e-07	76.087	EGFR (18.40 %) APC ( 6.75 %) BRAF ( 1.84 %) AKT1 ( 1.23 %) PIK3CD ( 1.23 %) RAF1 ( 0.61 %) PIK3CA ( 0.61 %) SRC ( 0.61 %)	0.022408	0.0443139	0.0657289	0.0866641	0.022408	0.469832	0.493326	0.663049	0.39261	0.364446	0.202783	0.0657289	0.577341	0.0657289	0.557743	0.481712	0.165818	0.127138	0.0657289	0.10713	0.40622	0.0443139	0.0657289	0.0866641	0.165818	0.18451	0.319732	0.18451	0.220647	0.10713	0.10713	0.0657289	0.165818	0.10713	0.10713	0.165818	0.0443139	0.40622	0.202783	0.271873
MCALPAIN PATHWAY	25	173404	12.8801	36	0.446385	1.78028e-09	1.52644e-06	86.1111	EGFR (18.40 %) PRKACB ( 1.84 %) PTK2 ( 1.23 %) HRAS ( 0.61 %) PRKAR1A ( 0.61 %)	0.0140645	0.0279311	0.0416027	0.0550821	0.0140645	0.327397	0.346184	0.493326	0.267736	0.246696	0.132069	0.0416027	0.416227	0.0416027	0.399453	0.336857	0.10713	0.0814747	0.0416027	0.0683719	0.278035	0.0279311	0.0416027	0.0550821	0.10713	0.119688	0.213996	0.119688	0.144276	0.0683719	0.0683719	0.0416027	0.10713	0.0683719	0.0683719	0.10713	0.0279311	0.278035	0.132069	0.179876
SIGNAL TRANSDUCTION BY L1	34	285345	12.8801	36	0.446385	1.78028e-09	1.52644e-06	86.1111	EGFR (18.40 %) FGFR1 ( 1.84 %) RPS6KA6 ( 1.23 %) RPS6KA1 ( 0.61 %) RPS6KA4 ( 0.61 %)	0.0140645	0.0279311	0.0416027	0.0550821	0.0140645	0.327397	0.346184	0.493326	0.267736	0.246696	0.132069	0.0416027	0.416227	0.0416027	0.399453	0.336857	0.10713	0.0814747	0.0416027	0.0683719	0.278035	0.0279311	0.0416027	0.0550821	0.10713	0.119688	0.213996	0.119688	0.144276	0.0683719	0.0683719	0.0416027	0.10713	0.0683719	0.0683719	0.10713	0.0279311	0.278035	0.132069	0.179876
SIGNALING BY PDGF	122	851417	52.6954	84	0.202507	4.97763e-09	4.21355e-06	72.619	KRAS (36.81 %) PDGFRA ( 3.68 %) PRKCG ( 2.45 %) PTEN ( 2.45 %) NRAS ( 1.84 %) PDGFRB ( 1.84 %) PRKACB ( 1.84 %) PRKCE ( 1.84 %) TSC2 ( 1.84 %) AKT1 ( 1.23 %) FOXO3 ( 1.23 %) GRB7 ( 1.23 %) MDM2 ( 1.23 %) PIK3R2 ( 1.23 %) STAT5B ( 1.23 %) AKT3 ( 0.61 %) RAPGEF1 ( 0.61 %) GSK3A ( 0.61 %) HRAS ( 0.61 %) PIK3CA ( 0.61 %) PLCG1 ( 0.61 %) PRKACA ( 0.61 %) PRKAR1A ( 0.61 %) PRKCD ( 0.61 %) RAF1 ( 0.61 %…	0.078869	0.151518	0.218437	0.280078	0.078869	0.89977	0.914956	0.980617	0.835914	0.806613	0.560242	0.218437	0.955923	0.218437	0.948052	0.907675	0.481712	0.389159	0.218437	0.336857	0.848855	0.151518	0.218437	0.280078	0.481712	0.522589	0.752563	0.522589	0.594925	0.336857	0.336857	0.218437	0.481712	0.336857	0.336857	0.481712	0.151518	0.848855	0.560242	0.683408
DOWNSTREAM SIGNAL TRANSDUCTION	95	652947	52.6954	84	0.202507	4.97763e-09	4.21355e-06	72.619	KRAS (36.81 %) PDGFRA ( 3.68 %) PRKCG ( 2.45 %) PTEN ( 2.45 %) NRAS ( 1.84 %) PDGFRB ( 1.84 %) PRKACB ( 1.84 %) PRKCE ( 1.84 %) TSC2 ( 1.84 %) AKT1 ( 1.23 %) FOXO3 ( 1.23 %) GRB7 ( 1.23 %) MDM2 ( 1.23 %) PIK3R2 ( 1.23 %) STAT5B ( 1.23 %) AKT3 ( 0.61 %) RAPGEF1 ( 0.61 %) GSK3A ( 0.61 %) HRAS ( 0.61 %) PIK3CA ( 0.61 %) PLCG1 ( 0.61 %) PRKACA ( 0.61 %) PRKAR1A ( 0.61 %) PRKCD ( 0.61 %) RAF1 ( 0.61 %…	0.078869	0.151518	0.218437	0.280078	0.078869	0.89977	0.914956	0.980617	0.835914	0.806613	0.560242	0.218437	0.955923	0.218437	0.948052	0.907675	0.481712	0.389159	0.218437	0.336857	0.848855	0.151518	0.218437	0.280078	0.481712	0.522589	0.752563	0.522589	0.594925	0.336857	0.336857	0.218437	0.481712	0.336857	0.336857	0.481712	0.151518	0.848855	0.560242	0.683408
INSULIN SIGNALING PATHWAY	137	900757	56.1966	87	0.189809	1.047e-08	8.8067e-06	78.1609	KRAS (36.81 %) PIK3CG ( 3.07 %) BRAF ( 1.84 %) NRAS ( 1.84 %) PRKACB ( 1.84 %) TSC2 ( 1.84 %) INSR ( 1.84 %) IRS1 ( 1.84 %) AKT1 ( 1.23 %) MKNK1 ( 1.23 %) RPTOR ( 1.23 %) TSC1 ( 1.23 %) GSK3B ( 1.23 %) CBLB ( 1.23 %) MKNK2 ( 1.23 %) PIK3CD ( 1.23 %) PIK3R2 ( 1.23 %) GCK ( 0.61 %) IKBKB ( 0.61 %) AKT3 ( 0.61 %) SHC3 ( 0.61 %) PRKX ( 0.61 %) PRKACA ( 0.61 %) PRKAR1A ( 0.61 %) RAF1 ( 0.61 %) SHC1 ( …	0.0866641	0.165818	0.238111	0.30414	0.0866641	0.920995	0.934095	0.98711	0.863896	0.836841	0.596071	0.238111	0.968088	0.238111	0.961744	0.927842	0.515778	0.419525	0.238111	0.364446	0.875691	0.165818	0.238111	0.30414	0.515778	0.557743	0.78585	0.557743	0.631077	0.364446	0.364446	0.238111	0.515778	0.364446	0.364446	0.515778	0.165818	0.875691	0.596071	0.718922
ECADHERIN STABILIZATION PATHWAY	42	329982	15.1752	37	0.387067	4.28008e-08	3.5775e-05	83.7838	EGFR (18.40 %) MET ( 1.84 %) CTNNB1 ( 1.23 %) IGF1R ( 1.23 %) ROCK1 ( 0.61 %) EPHA2 ( 0.61 %)	0.0168535	0.033423	0.0497133	0.0657289	0.0168535	0.378687	0.399453	0.557743	0.31198	0.288189	0.156311	0.0497133	0.475805	0.0497133	0.457679	0.389159	0.127138	0.0969551	0.0497133	0.0814747	0.323576	0.033423	0.0497133	0.0657289	0.127138	0.141848	0.250952	0.141848	0.17053	0.0814747	0.0814747	0.0497133	0.127138	0.0814747	0.0814747	0.127138	0.033423	0.323576	0.156311	0.211766
SPRY PATHWAY	18	125297	12.8801	33	0.408596	9.72165e-08	8.07504e-05	84.8485	EGFR (18.40 %) SRC ( 0.61 %) HRAS ( 0.61 %) RAF1 ( 0.61 %) SHC1 ( 0.61 %)	0.0140645	0.0279311	0.0416027	0.0550821	0.0140645	0.327397	0.346184	0.493326	0.267736	0.246696	0.132069	0.0416027	0.416227	0.0416027	0.399453	0.336857	0.10713	0.0814747	0.0416027	0.0683719	0.278035	0.0279311	0.0416027	0.0550821	0.10713	0.119688	0.213996	0.119688	0.144276	0.0683719	0.0683719	0.0416027	0.10713	0.0683719	0.0683719	0.10713	0.0279311	0.278035	0.132069	0.179876
HER2 PATHWAY	22	171050	21.5996	45	0.318766	1.02366e-07	8.44993e-05	77.7778	EGFR (18.40 %) ERBB4 ( 4.91 %) PIK3CG ( 3.07 %) ERBB3 ( 1.84 %) HRAS ( 0.61 %) STAT3 ( 0.61 %) RAF1 ( 0.61 %) SHC1 ( 0.61 %) PIK3CA ( 0.61 %)	0.0251735	0.0497133	0.0736353	0.0969551	0.0251735	0.51026	0.534607	0.705888	0.429309	0.399453	0.225051	0.0736353	0.620476	0.0736353	0.600622	0.522589	0.18451	0.141848	0.0736353	0.119688	0.443675	0.0497133	0.0736353	0.0969551	0.18451	0.205039	0.351717	0.205039	0.244559	0.119688	0.119688	0.0736353	0.18451	0.119688	0.119688	0.18451	0.0497133	0.443675	0.225051	0.300186
NGF SIGNALLING VIA TRKA FROM THE PLASMA MEMBRANE	137	956811	58.4134	87	0.173007	1.07821e-07	8.8453e-05	67.8161	KRAS (36.81 %) NTRK1 ( 4.29 %) NTRK2 ( 3.68 %) PRKCG ( 2.45 %) PTEN ( 2.45 %) IRS1 ( 1.84 %) NRAS ( 1.84 %) PRKACB ( 1.84 %) PRKCE ( 1.84 %) BRAF ( 1.84 %) TSC2 ( 1.84 %) AKT1 ( 1.23 %) FOXO3 ( 1.23 %) MDM2 ( 1.23 %) PIK3R2 ( 1.23 %) MAP2K5 ( 1.23 %) AKT3 ( 0.61 %) RAPGEF1 ( 0.61 %) GSK3A ( 0.61 %) HRAS ( 0.61 %) PIK3CA ( 0.61 %) PLCG1 ( 0.61 %) SHC3 ( 0.61 %) PRKACA ( 0.61 %) PRKAR1A ( 0.61 %) P…	0.0918242	0.175217	0.250952	0.319732	0.0918242	0.932585	0.944397	0.990179	0.879846	0.85432	0.61832	0.250952	0.974269	0.250952	0.968803	0.938775	0.537236	0.438927	0.250952	0.382197	0.890879	0.175217	0.250952	0.319732	0.537236	0.579729	0.805514	0.579729	0.653367	0.382197	0.382197	0.250952	0.537236	0.382197	0.382197	0.537236	0.175217	0.890879	0.61832	0.740356
SIGNALING BY ILS	107	589394	53.8871	82	0.182329	1.3762e-07	0.000112207	71.9512	KRAS (36.81 %) JAK2 ( 3.07 %) FYN ( 1.84 %) HCK ( 1.84 %) IRAK2 ( 1.84 %) JAK3 ( 1.84 %) MAP3K3 ( 1.84 %) NRAS ( 1.84 %) PRKACB ( 1.84 %) TEC ( 1.84 %) IRAK1 ( 1.23 %) JAK1 ( 1.23 %) PIK3CD ( 1.23 %) PIK3R2 ( 1.23 %) STAT5B ( 1.23 %) TYK2 ( 1.23 %) VAV1 ( 1.23 %) YES1 ( 1.23 %) RAPGEF1 ( 0.61 %) HRAS ( 0.61 %) IKBKB ( 0.61 %) LCK ( 0.61 %) PIK3CA ( 0.61 %) MAP2K6 ( 0.61 %) RAF1 ( 0.61 %) RELA ( 0…	0.0814747	0.156311	0.225051	0.288189	0.0814747	0.907413	0.921885	0.983081	0.845828	0.817265	0.572525	0.225051	0.960421	0.225051	0.953088	0.914956	0.493326	0.399453	0.225051	0.346184	0.858389	0.156311	0.225051	0.288189	0.493326	0.534607	0.764197	0.534607	0.607353	0.346184	0.346184	0.225051	0.493326	0.346184	0.346184	0.493326	0.156311	0.858389	0.572525	0.695718
AGR PATHWAY	36	284044	21.5996	44	0.309006	3.08566e-07	0.000250051	79.5455	EGFR (18.40 %) PAK3 ( 3.07 %) PAK7 ( 2.45 %) PAK4 ( 1.84 %) PTK2 ( 1.23 %) PAK6 ( 1.23 %) MAPK8 ( 0.61 %) SRC ( 0.61 %) MUSK ( 0.61 %)	0.0251735	0.0497133	0.0736353	0.0969551	0.0251735	0.51026	0.534607	0.705888	0.429309	0.399453	0.225051	0.0736353	0.620476	0.0736353	0.600622	0.522589	0.18451	0.141848	0.0736353	0.119688	0.443675	0.0497133	0.0736353	0.0969551	0.18451	0.205039	0.351717	0.205039	0.244559	0.119688	0.119688	0.0736353	0.18451	0.119688	0.119688	0.18451	0.0497133	0.443675	0.225051	0.300186
TFF PATHWAY	21	141508	19.5303	41	0.322074	4.29498e-07	0.000345941	82.9268	EGFR (18.40 %) PIK3CG ( 3.07 %) PTK2 ( 1.23 %) AKT1 ( 1.23 %) CTNNB1 ( 1.23 %) HRAS ( 0.61 %) SHC1 ( 0.61 %) PIK3CA ( 0.61 %)	0.022408	0.0443139	0.0657289	0.0866641	0.022408	0.469832	0.493326	0.663049	0.39261	0.364446	0.202783	0.0657289	0.577341	0.0657289	0.557743	0.481712	0.165818	0.127138	0.0657289	0.10713	0.40622	0.0443139	0.0657289	0.0866641	0.165818	0.18451	0.319732	0.18451	0.220647	0.10713	0.10713	0.0657289	0.165818	0.10713	0.10713	0.165818	0.0443139	0.40622	0.202783	0.271873
ENDOCYTOSIS	183	1243006	42.1384	68	0.20783	4.55753e-07	0.000364877	70.5882	EGFR (18.40 %) ERBB4 ( 4.91 %) KDR ( 4.91 %) FGFR4 ( 4.29 %) NTRK1 ( 4.29 %) PDGFRA ( 3.68 %) FLT1 ( 2.45 %) MET ( 1.84 %) ERBB3 ( 1.84 %) FGFR2 ( 1.84 %) RET ( 1.84 %) IGF1R ( 1.23 %) MDM2 ( 1.23 %) GRK7 ( 1.23 %) CSF1R ( 1.23 %) CBLB ( 1.23 %) ADRBK2 ( 0.61 %) PRKCI ( 0.61 %) KIT ( 0.61 %) HRAS ( 0.61 %) SRC ( 0.61 %)	0.0577551	0.112175	0.163451	0.211766	0.0577551	0.810946	0.832153	0.942474	0.729851	0.695718	0.448383	0.163451	0.895715	0.163451	0.882538	0.821865	0.378687	0.300186	0.163451	0.257291	0.745454	0.112175	0.163451	0.211766	0.378687	0.414571	0.636266	0.414571	0.480241	0.257291	0.257291	0.163451	0.378687	0.257291	0.257291	0.378687	0.112175	0.745454	0.448383	0.565197
PI3K EVENTS IN ERBB2 SIGNALING	44	324239	27.4229	50	0.260856	1.14643e-06	0.000912338	76	EGFR (18.40 %) ERBB4 ( 4.91 %) PTEN ( 2.45 %) ERBB2 ( 1.84 %) ERBB3 ( 1.84 %) TSC2 ( 1.84 %) AKT1 ( 1.23 %) FOXO3 ( 1.23 %) MDM2 ( 1.23 %) AKT3 ( 0.61 %) GSK3A ( 0.61 %) PIK3CA ( 0.61 %)	0.033423	0.0657289	0.0969551	0.127138	0.033423	0.61397	0.639344	0.804409	0.526629	0.493326	0.288189	0.0969551	0.72522	0.0969551	0.705888	0.626873	0.238111	0.18451	0.0969551	0.156311	0.54245	0.0657289	0.0969551	0.127138	0.238111	0.263576	0.438927	0.263576	0.31198	0.156311	0.156311	0.0969551	0.238111	0.156311	0.156311	0.238111	0.0657289	0.54245	0.288189	0.378687
CALCIUM SIGNALING PATHWAY	178	1179969	34.413	58	0.226706	1.47207e-06	0.00116451	67.2414	EGFR (18.40 %) ERBB4 ( 4.91 %) GNAS ( 4.29 %) PDGFRA ( 3.68 %) PRKCG ( 2.45 %) PDGFRB ( 1.84 %) PRKACB ( 1.84 %) ERBB2 ( 1.84 %) ERBB3 ( 1.84 %) PLCG2 ( 1.23 %) PRKCB ( 1.23 %) CYSLTR2 ( 1.23 %) PRKX ( 0.61 %) PRKACA ( 0.61 %) PLCG1 ( 0.61 %) P2RX6 ( 0.61 %)	0.0443139	0.0866641	0.127138	0.165818	0.0443139	0.718922	0.743281	0.886464	0.631077	0.596071	0.364446	0.127138	0.821359	0.127138	0.804409	0.731377	0.30414	0.238111	0.127138	0.202783	0.647425	0.0866641	0.127138	0.165818	0.30414	0.334976	0.537236	0.334976	0.39261	0.202783	0.202783	0.127138	0.30414	0.202783	0.202783	0.30414	0.0866641	0.647425	0.364446	0.469832
PI3K CASCADE	71	433536	31.0188	54	0.240769	1.52914e-06	0.0012025	77.7778	STK11 (20.86 %) FGFR4 ( 4.29 %) PIK3C3 ( 3.07 %) FGFR1 ( 1.84 %) FGFR2 ( 1.84 %) INSR ( 1.84 %) IRS1 ( 1.84 %) TSC2 ( 1.84 %) EIF4G1 ( 1.23 %) PIK3R2 ( 1.23 %) RPTOR ( 1.23 %) TSC1 ( 1.23 %) PIK3CA ( 0.61 %) STRADB ( 0.61 %)	0.0388839	0.0762558	0.112175	0.146697	0.0388839	0.6706	0.695718	0.850981	0.582103	0.547606	0.327397	0.112175	0.778444	0.112175	0.760155	0.683408	0.271873	0.211766	0.112175	0.179876	0.598353	0.0762558	0.112175	0.146697	0.271873	0.300186	0.490447	0.300186	0.353551	0.179876	0.179876	0.112175	0.271873	0.179876	0.179876	0.271873	0.0762558	0.598353	0.327397	0.426066
ADAPTIVE IMMUNE SYSTEM	539	3409147	59.489	85	0.154982	1.90887e-06	0.00149229	71.7647	KRAS (36.81 %) PTEN ( 2.45 %) FYN ( 1.84 %) ITK ( 1.84 %) NRAS ( 1.84 %) PRKACB ( 1.84 %) TSC2 ( 1.84 %) AKT1 ( 1.23 %) FOXO3 ( 1.23 %) MDM2 ( 1.23 %) PIK3CD ( 1.23 %) PIK3R2 ( 1.23 %) PLCG2 ( 1.23 %) FBXW7 ( 1.23 %) PRKCB ( 1.23 %) VAV1 ( 1.23 %) YES1 ( 1.23 %) CBLB ( 1.23 %) AKT3 ( 0.61 %) GSK3A ( 0.61 %) HRAS ( 0.61 %) IKBKB ( 0.61 %) LCK ( 0.61 %) PIK3CA ( 0.61 %) PLCG1 ( 0.61 %) PRKACA ( 0.6…	0.0943933	0.179876	0.257291	0.327397	0.0943933	0.937726	0.948927	0.991428	0.887106	0.862345	0.628981	0.257291	0.976895	0.257291	0.971827	0.943604	0.547606	0.448383	0.257291	0.390887	0.897762	0.179876	0.257291	0.327397	0.547606	0.590309	0.814658	0.590309	0.664002	0.390887	0.390887	0.257291	0.547606	0.390887	0.390887	0.547606	0.179876	0.897762	0.628981	0.750451
ADIPOCYTOKINE SIGNALING PATHWAY	67	457904	25.5423	47	0.264838	2.29974e-06	0.00178734	89.3617	STK11 (20.86 %) JAK2 ( 3.07 %) PTPN11 ( 1.84 %) IRS1 ( 1.84 %) AKT1 ( 1.23 %) STAT3 ( 0.61 %) PRKCQ ( 0.61 %) IKBKB ( 0.61 %) AKT3 ( 0.61 %) MAPK8 ( 0.61 %) RELA ( 0.61 %)	0.030681	0.0604206	0.0892478	0.117191	0.030681	0.582103	0.607353	0.77592	0.496188	0.46379	0.267736	0.0892478	0.69399	0.0892478	0.674311	0.594925	0.220647	0.17053	0.0892478	0.144276	0.511646	0.0604206	0.0892478	0.117191	0.220647	0.244559	0.411245	0.244559	0.290203	0.144276	0.144276	0.0892478	0.220647	0.144276	0.144276	0.220647	0.0604206	0.511646	0.267736	0.353551
AJDISS 2PATHWAY	48	343237	27.4229	49	0.252083	3.02322e-06	0.00233596	73.4694	EGFR (18.40 %) NTRK2 ( 3.68 %) ROBO1 ( 2.45 %) FYN ( 1.84 %) MET ( 1.84 %) RET ( 1.84 %) CTNNB1 ( 1.23 %) JUP ( 1.23 %) ABL1 ( 1.23 %) IGF1R ( 1.23 %) HRAS ( 0.61 %) SRC ( 0.61 %)	0.033423	0.0657289	0.0969551	0.127138	0.033423	0.61397	0.639344	0.804409	0.526629	0.493326	0.288189	0.0969551	0.72522	0.0969551	0.705888	0.626873	0.238111	0.18451	0.0969551	0.156311	0.54245	0.0657289	0.0969551	0.127138	0.238111	0.263576	0.438927	0.263576	0.31198	0.156311	0.156311	0.0969551	0.238111	0.156311	0.156311	0.238111	0.0657289	0.54245	0.288189	0.378687
CHEMOKINE SIGNALING PATHWAY	190	974484	61.5782	86	0.145071	5.12414e-06	0.00393641	72.093	KRAS (36.81 %) JAK2 ( 3.07 %) PIK3CG ( 3.07 %) BRAF ( 1.84 %) JAK3 ( 1.84 %) NRAS ( 1.84 %) PRKACB ( 1.84 %) HCK ( 1.84 %) ITK ( 1.84 %) PTK2 ( 1.23 %) VAV1 ( 1.23 %) AKT1 ( 1.23 %) GRK7 ( 1.23 %) VAV2 ( 1.23 %) STAT5B ( 1.23 %) FOXO3 ( 1.23 %) PRKCB ( 1.23 %) GSK3B ( 1.23 %) PIK3CD ( 1.23 %) VAV3 ( 1.23 %) PIK3R2 ( 1.23 %) STAT3 ( 0.61 %) STAT2 ( 0.61 %) ADRBK2 ( 0.61 %) ROCK1 ( 0.61 %) IKBKB ( …	0.0995097	0.189117	0.269808	0.342469	0.0995097	0.946861	0.95691	0.993469	0.900336	0.877092	0.649417	0.269808	0.98137	0.269808	0.977026	0.952149	0.567653	0.466819	0.269808	0.4079	0.910253	0.189117	0.269808	0.342469	0.567653	0.610676	0.831677	0.610676	0.684304	0.4079	0.4079	0.269808	0.567653	0.4079	0.4079	0.567653	0.189117	0.910253	0.649417	0.769481
CYTOKINE CYTOKINE RECEPTOR INTERACTION	267	949456	37.6251	60	0.202674	6.61044e-06	0.00504901	73.3333	EGFR (18.40 %) KDR ( 4.91 %) PDGFRA ( 3.68 %) INHBA ( 3.07 %) FLT1 ( 2.45 %) FLT4 ( 2.45 %) MET ( 1.84 %) PDGFRB ( 1.84 %) CSF1R ( 1.23 %) VEGFC ( 1.23 %) ACVRL1 ( 1.23 %) ACVR1B ( 1.23 %) BMPR1B ( 1.23 %) TGFBR2 ( 0.61 %) TGFBR1 ( 0.61 %) KIT ( 0.61 %) ACVR2B ( 0.61 %) BMPR1A ( 0.61 %)	0.0497133	0.0969551	0.141848	0.18451	0.0497133	0.760155	0.783409	0.913498	0.674311	0.639344	0.399453	0.141848	0.855962	0.141848	0.840497	0.772078	0.334976	0.263576	0.141848	0.225051	0.690502	0.0969551	0.141848	0.18451	0.334976	0.368036	0.579729	0.368036	0.429309	0.225051	0.225051	0.141848	0.334976	0.225051	0.225051	0.334976	0.0969551	0.690502	0.399453	0.51026
ECADHERIN KERATINOCYTE PATHWAY	21	161890	19.5303	38	0.289074	9.75626e-06	0.00736709	78.9474	EGFR (18.40 %) FYN ( 1.84 %) JUP ( 1.23 %) CTNNB1 ( 1.23 %) AKT1 ( 1.23 %) PIK3CA ( 0.61 %) SRC ( 0.61 %) PLCG1 ( 0.61 %)	0.022408	0.0443139	0.0657289	0.0866641	0.022408	0.469832	0.493326	0.663049	0.39261	0.364446	0.202783	0.0657289	0.577341	0.0657289	0.557743	0.481712	0.165818	0.127138	0.0657289	0.10713	0.40622	0.0443139	0.0657289	0.0866641	0.165818	0.18451	0.319732	0.18451	0.220647	0.10713	0.10713	0.0657289	0.165818	0.10713	0.10713	0.165818	0.0443139	0.40622	0.202783	0.271873
L1CAM INTERACTIONS	86	749763	19.5303	38	0.289074	9.75626e-06	0.00736709	81.5789	EGFR (18.40 %) FGFR1 ( 1.84 %) CNTN6 ( 1.23 %) RPS6KA6 ( 1.23 %) RANBP9 ( 0.61 %) RPS6KA1 ( 0.61 %) SRC ( 0.61 %) RPS6KA4 ( 0.61 %)	0.022408	0.0443139	0.0657289	0.0866641	0.022408	0.469832	0.493326	0.663049	0.39261	0.364446	0.202783	0.0657289	0.577341	0.0657289	0.557743	0.481712	0.165818	0.127138	0.0657289	0.10713	0.40622	0.0443139	0.0657289	0.0866641	0.165818	0.18451	0.319732	0.18451	0.220647	0.10713	0.10713	0.0657289	0.165818	0.10713	0.10713	0.165818	0.0443139	0.40622	0.202783	0.271873
CYTOKINE SIGNALING IN IMMUNE SYSTEM	270	1642513	59.489	83	0.144641	1.03066e-05	0.0077387	67.4699	KRAS (36.81 %) JAK2 ( 3.07 %) FYN ( 1.84 %) HCK ( 1.84 %) IRAK2 ( 1.84 %) IRS1 ( 1.84 %) JAK3 ( 1.84 %) MAP3K3 ( 1.84 %) NRAS ( 1.84 %) PRKACB ( 1.84 %) TEC ( 1.84 %) EIF4G1 ( 1.23 %) IRAK1 ( 1.23 %) JAK1 ( 1.23 %) PIK3CD ( 1.23 %) PIK3R2 ( 1.23 %) STAT5B ( 1.23 %) TYK2 ( 1.23 %) VAV1 ( 1.23 %) YES1 ( 1.23 %) RAPGEF1 ( 0.61 %) HRAS ( 0.61 %) IKBKB ( 0.61 %) LCK ( 0.61 %) PIK3CA ( 0.61 %) PLCG1 ( …	0.0943933	0.179876	0.257291	0.327397	0.0943933	0.937726	0.948927	0.991428	0.887106	0.862345	0.628981	0.257291	0.976895	0.257291	0.971827	0.943604	0.547606	0.448383	0.257291	0.390887	0.897762	0.179876	0.257291	0.327397	0.547606	0.590309	0.814658	0.590309	0.664002	0.390887	0.390887	0.257291	0.547606	0.390887	0.390887	0.547606	0.179876	0.897762	0.628981	0.750451
CARDIACEGF PATHWAY	18	102775	17.3904	35	0.30376	1.22374e-05	0.00913681	80	EGFR (18.40 %) PRKCB ( 1.23 %) FOS ( 1.23 %) MYC ( 1.23 %) HRAS ( 0.61 %) RELA ( 0.61 %) PLCG1 ( 0.61 %)	0.0196347	0.0388839	0.0577551	0.0762558	0.0196347	0.426066	0.448383	0.61397	0.353551	0.327397	0.179876	0.0577551	0.529303	0.0577551	0.51026	0.437335	0.146697	0.112175	0.0577551	0.0943933	0.366244	0.0388839	0.0577551	0.0762558	0.146697	0.163451	0.28617	0.163451	0.195979	0.0943933	0.0943933	0.0577551	0.146697	0.0943933	0.0943933	0.146697	0.0388839	0.366244	0.179876	0.242416
EPITHELIAL CELL SIGNALING IN HELICOBACTER PYLORI INFECTION	68	397856	21.5996	40	0.267613	1.75774e-05	0.0130505	82.5	EGFR (18.40 %) PTPN11 ( 1.84 %) MET ( 1.84 %) PLCG2 ( 1.23 %) IKBKB ( 0.61 %) MAPK8 ( 0.61 %) RELA ( 0.61 %) SRC ( 0.61 %) PLCG1 ( 0.61 %)	0.0251735	0.0497133	0.0736353	0.0969551	0.0251735	0.51026	0.534607	0.705888	0.429309	0.399453	0.225051	0.0736353	0.620476	0.0736353	0.600622	0.522589	0.18451	0.141848	0.0736353	0.119688	0.443675	0.0497133	0.0736353	0.0969551	0.18451	0.205039	0.351717	0.205039	0.244559	0.119688	0.119688	0.0736353	0.18451	0.119688	0.119688	0.18451	0.0497133	0.443675	0.225051	0.300186
ADHERENS JUNCTION	75	602002	34.413	55	0.203641	2.11175e-05	0.0155918	83.6364	EGFR (18.40 %) ERBB2 ( 1.84 %) FGFR1 ( 1.84 %) INSR ( 1.84 %) MET ( 1.84 %) FYN ( 1.84 %) IGF1R ( 1.23 %) SMAD4 ( 1.23 %) CTNNB1 ( 1.23 %) YES1 ( 1.23 %) SMAD2 ( 0.61 %) TGFBR2 ( 0.61 %) TGFBR1 ( 0.61 %) SRC ( 0.61 %) NLK ( 0.61 %) FER ( 0.61 %)	0.0443139	0.0866641	0.127138	0.165818	0.0443139	0.718922	0.743281	0.886464	0.631077	0.596071	0.364446	0.127138	0.821359	0.127138	0.804409	0.731377	0.30414	0.238111	0.127138	0.202783	0.647425	0.0866641	0.127138	0.165818	0.30414	0.334976	0.537236	0.334976	0.39261	0.202783	0.202783	0.127138	0.30414	0.202783	0.202783	0.30414	0.0866641	0.647425	0.364446	0.469832
AT1R PATHWAY	36	214077	19.5303	37	0.277492	2.55477e-05	0.0186554	83.7838	EGFR (18.40 %) PRKCB ( 1.23 %) PTK2 ( 1.23 %) HRAS ( 0.61 %) MAPK8 ( 0.61 %) RAF1 ( 0.61 %) SHC1 ( 0.61 %) SRC ( 0.61 %)	0.022408	0.0443139	0.0657289	0.0866641	0.022408	0.469832	0.493326	0.663049	0.39261	0.364446	0.202783	0.0657289	0.577341	0.0657289	0.557743	0.481712	0.165818	0.127138	0.0657289	0.10713	0.40622	0.0443139	0.0657289	0.0866641	0.165818	0.18451	0.319732	0.18451	0.220647	0.10713	0.10713	0.0657289	0.165818	0.10713	0.10713	0.165818	0.0443139	0.40622	0.202783	0.271873
G ALPHA I PATHWAY	35	289612	19.5303	37	0.277492	2.55477e-05	0.0186554	81.0811	EGFR (18.40 %) BRAF ( 1.84 %) AKT1 ( 1.23 %) AKT3 ( 0.61 %) SHC1 ( 0.61 %) STAT3 ( 0.61 %) RAF1 ( 0.61 %) SRC ( 0.61 %)	0.022408	0.0443139	0.0657289	0.0866641	0.022408	0.469832	0.493326	0.663049	0.39261	0.364446	0.202783	0.0657289	0.577341	0.0657289	0.557743	0.481712	0.165818	0.127138	0.0657289	0.10713	0.40622	0.0443139	0.0657289	0.0866641	0.165818	0.18451	0.319732	0.18451	0.220647	0.10713	0.10713	0.0657289	0.165818	0.10713	0.10713	0.165818	0.0443139	0.40622	0.202783	0.271873
SIGNALLING BY NGF	217	1568796	65.5268	88	0.128064	2.63558e-05	0.0191403	64.7727	KRAS (36.81 %) NTRK1 ( 4.29 %) NTRK2 ( 3.68 %) PRKCG ( 2.45 %) PTEN ( 2.45 %) IRS1 ( 1.84 %) NRAS ( 1.84 %) PRKACB ( 1.84 %) PRKCE ( 1.84 %) BRAF ( 1.84 %) TSC2 ( 1.84 %) VAV3 ( 1.23 %) AKT1 ( 1.23 %) FOXO3 ( 1.23 %) IRAK1 ( 1.23 %) MDM2 ( 1.23 %) PIK3R2 ( 1.23 %) MAP2K5 ( 1.23 %) VAV1 ( 1.23 %) AKT3 ( 0.61 %) RAPGEF1 ( 0.61 %) GSK3A ( 0.61 %) HRAS ( 0.61 %) IKBKB ( 0.61 %) PIK3CA ( 0.61 %) PLCG1…	0.109656	0.207287	0.294213	0.371607	0.109656	0.961308	0.969328	0.996209	0.922326	0.902016	0.686975	0.294213	0.987888	0.294213	0.984721	0.965551	0.605122	0.501865	0.294213	0.440514	0.930844	0.207287	0.294213	0.371607	0.605122	0.648423	0.86117	0.648423	0.7213	0.440514	0.440514	0.294213	0.605122	0.440514	0.440514	0.605122	0.207287	0.930844	0.686975	0.803297
GAB1 SIGNALOSOME	38	281868	23.6024	42	0.250294	2.70308e-05	0.0195239	80.9524	EGFR (18.40 %) PTEN ( 2.45 %) TSC2 ( 1.84 %) AKT1 ( 1.23 %) FOXO3 ( 1.23 %) MDM2 ( 1.23 %) AKT3 ( 0.61 %) GSK3A ( 0.61 %) PIK3CA ( 0.61 %) SRC ( 0.61 %)	0.0279311	0.0550821	0.0814747	0.10713	0.0279311	0.547606	0.572525	0.743281	0.46379	0.432533	0.246696	0.0814747	0.659209	0.0814747	0.639344	0.560242	0.202783	0.156311	0.0814747	0.132069	0.478767	0.0550821	0.0814747	0.10713	0.202783	0.225051	0.382197	0.225051	0.267736	0.132069	0.132069	0.0814747	0.202783	0.132069	0.132069	0.202783	0.0550821	0.478767	0.246696	0.327397
BETA CATENIN NUC PATHWAY	80	503811	12.8801	27	0.321446	8.79207e-05	0.0631603	85.1852	APC (6.7 %) CDKN2A (5.5 %) TERT (3.1 %) CTNNB1 (1.2 %) MYC (1.2 %)	0.0140645	0.0279311	0.0416027	0.0550821	0.0140645	0.327397	0.346184	0.493326	0.267736	0.246696	0.132069	0.0416027	0.416227	0.0416027	0.399453	0.336857	0.10713	0.0814747	0.0416027	0.0683719	0.278035	0.0279311	0.0416027	0.0550821	0.10713	0.119688	0.213996	0.119688	0.144276	0.0683719	0.0683719	0.0416027	0.10713	0.0683719	0.0683719	0.10713	0.0279311	0.278035	0.132069	0.179876
ERK PATHWAY	28	200913	29.2474	47	0.20601	0.000114005	0.0814587	72.3404	EGFR (18.40 %) GNAS ( 4.29 %) PDGFRA ( 3.68 %) MKNK2 ( 1.23 %) MKNK1 ( 1.23 %) IGF1R ( 1.23 %) MYC ( 1.23 %) HRAS ( 0.61 %) STAT3 ( 0.61 %) RAF1 ( 0.61 %) SHC1 ( 0.61 %) SRC ( 0.61 %) RPS6KA1 ( 0.61 %)	0.0361573	0.0710073	0.104597	0.136973	0.0361573	0.643407	0.668728	0.829276	0.55523	0.521234	0.308071	0.104597	0.753263	0.104597	0.734404	0.656301	0.255184	0.198254	0.104597	0.168177	0.571312	0.0710073	0.104597	0.136973	0.255184	0.282114	0.465307	0.282114	0.333089	0.168177	0.168177	0.104597	0.255184	0.168177	0.168177	0.255184	0.0710073	0.571312	0.308071	0.402846
MTOR SIGNALING PATHWAY	52	380351	31.0188	49	0.198571	0.000117845	0.0837522	75.5102	STK11 (20.86 %) PIK3CG ( 3.07 %) TSC2 ( 1.84 %) BRAF ( 1.84 %) RPS6KA6 ( 1.23 %) RPTOR ( 1.23 %) AKT1 ( 1.23 %) TSC1 ( 1.23 %) VEGFC ( 1.23 %) PIK3CD ( 1.23 %) PIK3R2 ( 1.23 %) AKT3 ( 0.61 %) RPS6KA1 ( 0.61 %) PIK3CA ( 0.61 %)	0.0388839	0.0762558	0.112175	0.146697	0.0388839	0.6706	0.695718	0.850981	0.582103	0.547606	0.327397	0.112175	0.778444	0.112175	0.760155	0.683408	0.271873	0.211766	0.112175	0.179876	0.598353	0.0762558	0.112175	0.146697	0.271873	0.300186	0.490447	0.300186	0.353551	0.179876	0.179876	0.112175	0.271873	0.179876	0.179876	0.271873	0.0762558	0.598353	0.327397	0.426066
DOUBLE STRAND BREAK REPAIR	24	195803	10.4996	23	0.340556	0.000178701	0.126326	95.6522	ATM (7.98 %) PRKDC (4.29 %) BRCA2 (1.23 %) BRCA1 (0.61 %)	0.0112675	0.022408	0.033423	0.0443139	0.0112675	0.271873	0.288189	0.419525	0.220647	0.202783	0.10713	0.033423	0.349878	0.033423	0.334976	0.280078	0.0866641	0.0657289	0.033423	0.0550821	0.229429	0.022408	0.033423	0.0443139	0.0866641	0.0969551	0.175217	0.0969551	0.117191	0.0550821	0.0550821	0.033423	0.0866641	0.0550821	0.0550821	0.0866641	0.022408	0.229429	0.10713	0.146697
A6B1 A6B4 INTEGRIN PATHWAY	46	342540	23.6024	39	0.218109	0.000337379	0.237237	79.4872	EGFR (18.40 %) ERBB2 ( 1.84 %) ERBB3 ( 1.84 %) MET ( 1.84 %) AKT1 ( 1.23 %) HRAS ( 0.61 %) SHC1 ( 0.61 %) PIK3CA ( 0.61 %) MST1R ( 0.61 %) MST1 ( 0.61 %)	0.0279311	0.0550821	0.0814747	0.10713	0.0279311	0.547606	0.572525	0.743281	0.46379	0.432533	0.246696	0.0814747	0.659209	0.0814747	0.639344	0.560242	0.202783	0.156311	0.0814747	0.132069	0.478767	0.0550821	0.0814747	0.10713	0.202783	0.225051	0.382197	0.225051	0.267736	0.132069	0.132069	0.0814747	0.202783	0.132069	0.132069	0.202783	0.0550821	0.478767	0.246696	0.327397
DELTA NP63 PATHWAY	47	310263	21.5996	36	0.221856	0.000542084	0.379173	94.4444	ATM (7.98 %) CDKN2A (5.52 %) TP63 (2.45 %) GSK3B (1.23 %) MDM2 (1.23 %) BRCA2 (1.23 %) NOTCH1 (1.23 %) FBXW7 (1.23 %) AXL (0.61 %)	0.0251735	0.0497133	0.0736353	0.0969551	0.0251735	0.51026	0.534607	0.705888	0.429309	0.399453	0.225051	0.0736353	0.620476	0.0736353	0.600622	0.522589	0.18451	0.141848	0.0736353	0.119688	0.443675	0.0497133	0.0736353	0.0969551	0.18451	0.205039	0.351717	0.205039	0.244559	0.119688	0.119688	0.0736353	0.18451	0.119688	0.119688	0.18451	0.0497133	0.443675	0.225051	0.300186
REGULATION OF THE FANCONI ANEMIA PATHWAY	11	57660	5.45893	14	0.409021	0.000940003	0.654065	92.8571	ATM (7.98 %) ATR (0.61 %)	0.0056497	0.0112675	0.0168535	0.022408	0.0056497	0.146697	0.156311	0.238111	0.117191	0.10713	0.0550821	0.0168535	0.193698	0.0168535	0.18451	0.151518	0.0443139	0.033423	0.0168535	0.0279311	0.122178	0.0112675	0.0168535	0.022408	0.0443139	0.0497133	0.0918242	0.0497133	0.0604206	0.0279311	0.0279311	0.0168535	0.0443139	0.0279311	0.0279311	0.0443139	0.0112675	0.122178	0.0550821	0.0762558
LYSOPHOSPHOLIPID PATHWAY	66	471480	27.4229	42	0.185136	0.00099724	0.690277	83.3333	EGFR (18.40 %) PRKCE ( 1.84 %) GSK3B ( 1.23 %) PTK2 ( 1.23 %) AKT1 ( 1.23 %) FOS ( 1.23 %) RELA ( 0.61 %) HRAS ( 0.61 %) PRKCD ( 0.61 %) PLCG1 ( 0.61 %) PRKD1 ( 0.61 %) SRC ( 0.61 %)	0.033423	0.0657289	0.0969551	0.127138	0.033423	0.61397	0.639344	0.804409	0.526629	0.493326	0.288189	0.0969551	0.72522	0.0969551	0.705888	0.626873	0.238111	0.18451	0.0969551	0.156311	0.54245	0.0657289	0.0969551	0.127138	0.238111	0.263576	0.438927	0.263576	0.31198	0.156311	0.156311	0.0969551	0.238111	0.156311	0.156311	0.238111	0.0657289	0.54245	0.288189	0.378687
TCPTP PATHWAY	43	326854	37.6251	53	0.148798	0.00131314	0.904227	73.5849	EGFR (18.40 %) KDR ( 4.91 %) PDGFRB ( 1.84 %) JAK3 ( 1.84 %) INSR ( 1.84 %) MET ( 1.84 %) PIK3R2 ( 1.23 %) PIK3CD ( 1.23 %) CSF1R ( 1.23 %) JAK1 ( 1.23 %) STAT5B ( 1.23 %) PIK3CA ( 0.61 %) SHC1 ( 0.61 %) STAT3 ( 0.61 %) SRC ( 0.61 %) STAT5A ( 0.61 %) STAT6 ( 0.61 %) ATR ( 0.61 %)	0.0497133	0.0969551	0.141848	0.18451	0.0497133	0.760155	0.783409	0.913498	0.674311	0.639344	0.399453	0.141848	0.855962	0.141848	0.840497	0.772078	0.334976	0.263576	0.141848	0.225051	0.690502	0.0969551	0.141848	0.18451	0.334976	0.368036	0.579729	0.368036	0.429309	0.225051	0.225051	0.141848	0.334976	0.225051	0.225051	0.334976	0.0969551	0.690502	0.399453	0.51026
MYOCYTE AD PATHWAY	27	194859	5.45893	13	0.376836	0.00280367	1.90106	84.6154	APC (6.7 %) AKT1 (1.2 %)	0.0056497	0.0112675	0.0168535	0.022408	0.0056497	0.146697	0.156311	0.238111	0.117191	0.10713	0.0550821	0.0168535	0.193698	0.0168535	0.18451	0.151518	0.0443139	0.033423	0.0168535	0.0279311	0.122178	0.0112675	0.0168535	0.022408	0.0443139	0.0497133	0.0918242	0.0497133	0.0604206	0.0279311	0.0279311	0.0168535	0.0443139	0.0279311	0.0279311	0.0443139	0.0112675	0.122178	0.0550821	0.0762558
SIGNALING BY WNT	65	344672	5.45893	13	0.376836	0.00280367	1.90106	84.6154	APC (6.7 %) CTNNB1 (1.2 %)	0.0056497	0.0112675	0.0168535	0.022408	0.0056497	0.146697	0.156311	0.238111	0.117191	0.10713	0.0550821	0.0168535	0.193698	0.0168535	0.18451	0.151518	0.0443139	0.033423	0.0168535	0.0279311	0.122178	0.0112675	0.0168535	0.022408	0.0443139	0.0497133	0.0918242	0.0497133	0.0604206	0.0279311	0.0279311	0.0168535	0.0443139	0.0279311	0.0279311	0.0443139	0.0112675	0.122178	0.0550821	0.0762558
CTNNB1 PHOSPHORYLATION CASCADE	16	97474	5.45893	13	0.376836	0.00280367	1.90106	84.6154	APC (6.7 %) CTNNB1 (1.2 %)	0.0056497	0.0112675	0.0168535	0.022408	0.0056497	0.146697	0.156311	0.238111	0.117191	0.10713	0.0550821	0.0168535	0.193698	0.0168535	0.18451	0.151518	0.0443139	0.033423	0.0168535	0.0279311	0.122178	0.0112675	0.0168535	0.022408	0.0443139	0.0497133	0.0918242	0.0497133	0.0604206	0.0279311	0.0279311	0.0168535	0.0443139	0.0279311	0.0279311	0.0443139	0.0112675	0.122178	0.0550821	0.0762558
TXA2PATHWAY	57	345735	39.1683	53	0.131341	0.00366149	2.47011	77.3585	EGFR (18.40 %) PIK3CG ( 3.07 %) PRKCG ( 2.45 %) PRKCE ( 1.84 %) FYN ( 1.84 %) HCK ( 1.84 %) AKT1 ( 1.23 %) YES1 ( 1.23 %) PRKCB ( 1.23 %) PRKCQ ( 0.61 %) PRKCD ( 0.61 %) PRKACA ( 0.61 %) ROCK1 ( 0.61 %) SRC ( 0.61 %) SYK ( 0.61 %) LCK ( 0.61 %) PRKCH ( 0.61 %) PRKG1 ( 0.61 %) ADRBK2 ( 0.61 %)	0.0524015	0.102057	0.149111	0.193698	0.0524015	0.778444	0.801056	0.924496	0.69399	0.659209	0.416227	0.149111	0.870662	0.149111	0.855962	0.790054	0.349878	0.275987	0.149111	0.23595	0.710025	0.102057	0.149111	0.193698	0.349878	0.383945	0.599489	0.383945	0.446818	0.23595	0.23595	0.149111	0.349878	0.23595	0.23595	0.349878	0.102057	0.710025	0.416227	0.529303
IMMUNE SYSTEM	933	5404740	81.6741	96	0.070187	0.00524271	3.51897	62.5	KRAS (36.81 %) JAK2 ( 3.07 %) PIK3C3 ( 3.07 %) PTEN ( 2.45 %) FYN ( 1.84 %) HCK ( 1.84 %) IRAK2 ( 1.84 %) IRS1 ( 1.84 %) ITK ( 1.84 %) JAK3 ( 1.84 %) MAP3K3 ( 1.84 %) NRAS ( 1.84 %) PRKACB ( 1.84 %) TEC ( 1.84 %) TSC2 ( 1.84 %) EIF4G1 ( 1.23 %) AKT1 ( 1.23 %) FOXO3 ( 1.23 %) FOS ( 1.23 %) IRAK1 ( 1.23 %) JAK1 ( 1.23 %) MDM2 ( 1.23 %) PIK3CD ( 1.23 %) PIK3R2 ( 1.23 %) PLCG2 ( 1.23 %) FBXW7 ( 1.23 …	0.158698	0.292211	0.404536	0.499035	0.158698	0.992081	0.994395	0.99975	0.977667	0.968447	0.822369	0.404536	0.998593	0.404536	0.998013	0.993338	0.749034	0.645422	0.404536	0.578537	0.981211	0.292211	0.404536	0.499035	0.749034	0.788861	0.947011	0.788861	0.850558	0.578537	0.578537	0.404536	0.749034	0.578537	0.578537	0.749034	0.292211	0.981211	0.822369	0.911013
HOMOLOGOUS RECOMBINATION REPAIR OF REPLICATION INDEPENDENT DOUBLE STRAND BREAKS	17	158345	8.02798	16	0.299514	0.00532991	3.54172	93.75	ATM (7.98 %) BRCA2 (1.23 %) BRCA1 (0.61 %)	0.00846257	0.0168535	0.0251735	0.033423	0.00846257	0.211766	0.225051	0.334976	0.17053	0.156311	0.0814747	0.0251735	0.275987	0.0251735	0.263576	0.218437	0.0657289	0.0497133	0.0251735	0.0416027	0.17755	0.0168535	0.0251735	0.033423	0.0657289	0.0736353	0.134524	0.0736353	0.0892478	0.0416027	0.0416027	0.0251735	0.0657289	0.0416027	0.0416027	0.0657289	0.0168535	0.17755	0.0814747	0.112175
MEIOTIC RECOMBINATION	86	249426	8.02798	16	0.299514	0.00532991	3.54172	93.75	ATM (7.98 %) BRCA2 (1.23 %) BRCA1 (0.61 %)	0.00846257	0.0168535	0.0251735	0.033423	0.00846257	0.211766	0.225051	0.334976	0.17053	0.156311	0.0814747	0.0251735	0.275987	0.0251735	0.263576	0.218437	0.0657289	0.0497133	0.0251735	0.0416027	0.17755	0.0168535	0.0251735	0.033423	0.0657289	0.0736353	0.134524	0.0736353	0.0892478	0.0416027	0.0416027	0.0251735	0.0657289	0.0416027	0.0416027	0.0657289	0.0168535	0.17755	0.0814747	0.112175
PTP1B PATHWAY	52	314738	39.1683	52	0.123069	0.00644422	4.26088	73.0769	EGFR (18.40 %) JAK2 ( 3.07 %) PDGFRB ( 1.84 %) INSR ( 1.84 %) HCK ( 1.84 %) IRS1 ( 1.84 %) FYN ( 1.84 %) STAT5B ( 1.23 %) AKT1 ( 1.23 %) TYK2 ( 1.23 %) CSF1R ( 1.23 %) YES1 ( 1.23 %) SRC ( 0.61 %) STAT3 ( 0.61 %) FER ( 0.61 %) STAT5A ( 0.61 %) SHC1 ( 0.61 %) LCK ( 0.61 %) PIK3CA ( 0.61 %)	0.0524015	0.102057	0.149111	0.193698	0.0524015	0.778444	0.801056	0.924496	0.69399	0.659209	0.416227	0.149111	0.870662	0.149111	0.855962	0.790054	0.349878	0.275987	0.149111	0.23595	0.710025	0.102057	0.149111	0.193698	0.349878	0.383945	0.599489	0.383945	0.446818	0.23595	0.23595	0.149111	0.349878	0.23595	0.23595	0.349878	0.102057	0.710025	0.416227	0.529303
FOCAL ADHESION	201	1596629	63.5892	77	0.0831073	0.00826739	5.43929	62.3377	EGFR (18.40 %) KDR ( 4.91 %) PDGFRA ( 3.68 %) PAK3 ( 3.07 %) PIK3CG ( 3.07 %) FLT1 ( 2.45 %) FLT4 ( 2.45 %) PTEN ( 2.45 %) PAK7 ( 2.45 %) PRKCG ( 2.45 %) MET ( 1.84 %) PAK4 ( 1.84 %) PDGFRB ( 1.84 %) BRAF ( 1.84 %) ERBB2 ( 1.84 %) FYN ( 1.84 %) IGF1R ( 1.23 %) PTK2 ( 1.23 %) AKT1 ( 1.23 %) PAK6 ( 1.23 %) CTNNB1 ( 1.23 %) VAV3 ( 1.23 %) VAV1 ( 1.23 %) VAV2 ( 1.23 %) VEGFC ( 1.23 %) PRKCB ( 1.23 %)…	0.104597	0.198254	0.282114	0.357203	0.104597	0.954656	0.963646	0.995024	0.912016	0.890259	0.668728	0.282114	0.984979	0.282114	0.981265	0.959399	0.586812	0.48464	0.282114	0.424438	0.921218	0.198254	0.282114	0.357203	0.586812	0.63003	0.847133	0.63003	0.703378	0.424438	0.424438	0.282114	0.586812	0.424438	0.424438	0.586812	0.198254	0.921218	0.668728	0.787059
NFKAPPAB CANONICAL PATHWAY	23	195730	8.02798	15	0.271485	0.0124099	8.00619	93.3333	ATM (7.98 %) RELA (0.61 %) IKBKB (0.61 %)	0.00846257	0.0168535	0.0251735	0.033423	0.00846257	0.211766	0.225051	0.334976	0.17053	0.156311	0.0814747	0.0251735	0.275987	0.0251735	0.263576	0.218437	0.0657289	0.0497133	0.0251735	0.0416027	0.17755	0.0168535	0.0251735	0.033423	0.0657289	0.0736353	0.134524	0.0736353	0.0892478	0.0416027	0.0416027	0.0251735	0.0657289	0.0416027	0.0416027	0.0657289	0.0168535	0.17755	0.0814747	0.112175
HNF3B PATHWAY	45	240598	8.02798	15	0.271485	0.0124099	8.00619	73.3333	NF1 (7.98 %) AKT1 (1.23 %) GCK (0.61 %)	0.00846257	0.0168535	0.0251735	0.033423	0.00846257	0.211766	0.225051	0.334976	0.17053	0.156311	0.0814747	0.0251735	0.275987	0.0251735	0.263576	0.218437	0.0657289	0.0497133	0.0251735	0.0416027	0.17755	0.0168535	0.0251735	0.033423	0.0657289	0.0736353	0.134524	0.0736353	0.0892478	0.0416027	0.0416027	0.0251735	0.0657289	0.0416027	0.0416027	0.0657289	0.0168535	0.17755	0.0814747	0.112175
P53 INDEPENDENT G1 S DNA DAMAGE CHECKPOINT	51	261400	8.02798	15	0.271485	0.0124099	8.00619	86.6667	ATM (7.98 %) CDC25A (1.23 %) CHEK1 (0.61 %)	0.00846257	0.0168535	0.0251735	0.033423	0.00846257	0.211766	0.225051	0.334976	0.17053	0.156311	0.0814747	0.0251735	0.275987	0.0251735	0.263576	0.218437	0.0657289	0.0497133	0.0251735	0.0416027	0.17755	0.0168535	0.0251735	0.033423	0.0657289	0.0736353	0.134524	0.0736353	0.0892478	0.0416027	0.0416027	0.0251735	0.0657289	0.0416027	0.0416027	0.0657289	0.0168535	0.17755	0.0814747	0.112175
G2 M DNA DAMAGE CHECKPOINT	12	67622	8.02798	15	0.271485	0.0124099	8.00619	93.3333	ATM (7.98 %) CHEK1 (0.61 %) ATR (0.61 %)	0.00846257	0.0168535	0.0251735	0.033423	0.00846257	0.211766	0.225051	0.334976	0.17053	0.156311	0.0814747	0.0251735	0.275987	0.0251735	0.263576	0.218437	0.0657289	0.0497133	0.0251735	0.0416027	0.17755	0.0168535	0.0251735	0.033423	0.0657289	0.0736353	0.134524	0.0736353	0.0892478	0.0416027	0.0416027	0.0251735	0.0657289	0.0416027	0.0416027	0.0657289	0.0168535	0.17755	0.0814747	0.112175
INHIBITION OF REPLICATION INITIATION OF DAMAGED DNA BY RB1 E2F1	13	73302	5.45893	11	0.304285	0.0194224	12.4697	100	RB1 (4.3 %) TFDP1 (2.5 %)	0.0056497	0.0112675	0.0168535	0.022408	0.0056497	0.146697	0.156311	0.238111	0.117191	0.10713	0.0550821	0.0168535	0.193698	0.0168535	0.18451	0.151518	0.0443139	0.033423	0.0168535	0.0279311	0.122178	0.0112675	0.0168535	0.022408	0.0443139	0.0497133	0.0918242	0.0497133	0.0604206	0.0279311	0.0279311	0.0168535	0.0443139	0.0279311	0.0279311	0.0443139	0.0112675	0.122178	0.0550821	0.0762558
NON HOMOLOGOUS END JOINING	14	72483	2.78547	7	0.4002	0.0212637	12.963	100	PRKDC (4.3 %)	0.00282885	0.0056497	0.00846257	0.0112675	0.00282885	0.0762558	0.0814747	0.127138	0.0604206	0.0550821	0.0279311	0.00846257	0.102057	0.00846257	0.0969551	0.078869	0.022408	0.0168535	0.00846257	0.0140645	0.0630785	0.0056497	0.00846257	0.0112675	0.022408	0.0251735	0.0470174	0.0251735	0.030681	0.0140645	0.0140645	0.00846257	0.022408	0.0140645	0.0140645	0.022408	0.0056497	0.0630785	0.0279311	0.0388839
BARRESTIN PATHWAY	10	92783	2.78547	7	0.4002	0.0212637	12.963	100	GNAS (4.3 %)	0.00282885	0.0056497	0.00846257	0.0112675	0.00282885	0.0762558	0.0814747	0.127138	0.0604206	0.0550821	0.0279311	0.00846257	0.102057	0.00846257	0.0969551	0.078869	0.022408	0.0168535	0.00846257	0.0140645	0.0630785	0.0056497	0.00846257	0.0112675	0.022408	0.0251735	0.0470174	0.0251735	0.030681	0.0140645	0.0140645	0.00846257	0.022408	0.0140645	0.0140645	0.022408	0.0056497	0.0630785	0.0279311	0.0388839
ACTINY PATHWAY	20	128089	2.78547	7	0.4002	0.0212637	12.963	100	NTRK1 (4.3 %)	0.00282885	0.0056497	0.00846257	0.0112675	0.00282885	0.0762558	0.0814747	0.127138	0.0604206	0.0550821	0.0279311	0.00846257	0.102057	0.00846257	0.0969551	0.078869	0.022408	0.0168535	0.00846257	0.0140645	0.0630785	0.0056497	0.00846257	0.0112675	0.022408	0.0251735	0.0470174	0.0251735	0.030681	0.0140645	0.0140645	0.00846257	0.022408	0.0140645	0.0140645	0.022408	0.0056497	0.0630785	0.0279311	0.0388839
DNA PK PATHWAY	16	102246	2.78547	7	0.4002	0.0212637	12.963	100	PRKDC (4.3 %)	0.00282885	0.0056497	0.00846257	0.0112675	0.00282885	0.0762558	0.0814747	0.127138	0.0604206	0.0550821	0.0279311	0.00846257	0.102057	0.00846257	0.0969551	0.078869	0.022408	0.0168535	0.00846257	0.0140645	0.0630785	0.0056497	0.00846257	0.0112675	0.022408	0.0251735	0.0470174	0.0251735	0.030681	0.0140645	0.0140645	0.00846257	0.022408	0.0140645	0.0140645	0.022408	0.0056497	0.0630785	0.0279311	0.0388839
ORC1 REMOVAL FROM CHROMATIN	67	322382	2.78547	7	0.4002	0.0212637	12.963	100	RB1 (4.3 %)	0.00282885	0.0056497	0.00846257	0.0112675	0.00282885	0.0762558	0.0814747	0.127138	0.0604206	0.0550821	0.0279311	0.00846257	0.102057	0.00846257	0.0969551	0.078869	0.022408	0.0168535	0.00846257	0.0140645	0.0630785	0.0056497	0.00846257	0.0112675	0.022408	0.0251735	0.0470174	0.0251735	0.030681	0.0140645	0.0140645	0.00846257	0.022408	0.0140645	0.0140645	0.022408	0.0056497	0.0630785	0.0279311	0.0388839
RETROGRADE NEUROTROPHIN SIGNALLING	13	86946	2.78547	7	0.4002	0.0212637	12.963	100	NTRK1 (4.3 %)	0.00282885	0.0056497	0.00846257	0.0112675	0.00282885	0.0762558	0.0814747	0.127138	0.0604206	0.0550821	0.0279311	0.00846257	0.102057	0.00846257	0.0969551	0.078869	0.022408	0.0168535	0.00846257	0.0140645	0.0630785	0.0056497	0.00846257	0.0112675	0.022408	0.0251735	0.0470174	0.0251735	0.030681	0.0140645	0.0140645	0.00846257	0.022408	0.0140645	0.0140645	0.022408	0.0056497	0.0630785	0.0279311	0.0388839
GLUCAGON TYPE LIGAND RECEPTORS	33	131952	2.78547	7	0.4002	0.0212637	12.963	100	GNAS (4.3 %)	0.00282885	0.0056497	0.00846257	0.0112675	0.00282885	0.0762558	0.0814747	0.127138	0.0604206	0.0550821	0.0279311	0.00846257	0.102057	0.00846257	0.0969551	0.078869	0.022408	0.0168535	0.00846257	0.0140645	0.0630785	0.0056497	0.00846257	0.0112675	0.022408	0.0251735	0.0470174	0.0251735	0.030681	0.0140645	0.0140645	0.00846257	0.022408	0.0140645	0.0140645	0.022408	0.0056497	0.0630785	0.0279311	0.0388839
G ALPHA I SIGNALLING EVENTS	195	723869	2.78547	7	0.4002	0.0212637	12.963	100	GNAS (4.3 %)	0.00282885	0.0056497	0.00846257	0.0112675	0.00282885	0.0762558	0.0814747	0.127138	0.0604206	0.0550821	0.0279311	0.00846257	0.102057	0.00846257	0.0969551	0.078869	0.022408	0.0168535	0.00846257	0.0140645	0.0630785	0.0056497	0.00846257	0.0112675	0.022408	0.0251735	0.0470174	0.0251735	0.030681	0.0140645	0.0140645	0.00846257	0.022408	0.0140645	0.0140645	0.022408	0.0056497	0.0630785	0.0279311	0.0388839
SYNTHESIS OF DNA	92	431341	2.78547	7	0.4002	0.0212637	12.963	100	RB1 (4.3 %)	0.00282885	0.0056497	0.00846257	0.0112675	0.00282885	0.0762558	0.0814747	0.127138	0.0604206	0.0550821	0.0279311	0.00846257	0.102057	0.00846257	0.0969551	0.078869	0.022408	0.0168535	0.00846257	0.0140645	0.0630785	0.0056497	0.00846257	0.0112675	0.022408	0.0251735	0.0470174	0.0251735	0.030681	0.0140645	0.0140645	0.00846257	0.022408	0.0140645	0.0140645	0.022408	0.0056497	0.0630785	0.0279311	0.0388839
PROSTACYCLIN SIGNALLING THROUGH PROSTACYCLIN RECEPTOR	19	82769	2.78547	7	0.4002	0.0212637	12.963	100	GNAS (4.3 %)	0.00282885	0.0056497	0.00846257	0.0112675	0.00282885	0.0762558	0.0814747	0.127138	0.0604206	0.0550821	0.0279311	0.00846257	0.102057	0.00846257	0.0969551	0.078869	0.022408	0.0168535	0.00846257	0.0140645	0.0630785	0.0056497	0.00846257	0.0112675	0.022408	0.0251735	0.0470174	0.0251735	0.030681	0.0140645	0.0140645	0.00846257	0.022408	0.0140645	0.0140645	0.022408	0.0056497	0.0630785	0.0279311	0.0388839
FGFR4 LIGAND BINDING AND ACTIVATION	12	39689	2.78547	7	0.4002	0.0212637	12.963	100	FGFR4 (4.3 %)	0.00282885	0.0056497	0.00846257	0.0112675	0.00282885	0.0762558	0.0814747	0.127138	0.0604206	0.0550821	0.0279311	0.00846257	0.102057	0.00846257	0.0969551	0.078869	0.022408	0.0168535	0.00846257	0.0140645	0.0630785	0.0056497	0.00846257	0.0112675	0.022408	0.0251735	0.0470174	0.0251735	0.030681	0.0140645	0.0140645	0.00846257	0.022408	0.0140645	0.0140645	0.022408	0.0056497	0.0630785	0.0279311	0.0388839
FAS PATHWAY	30	210482	8.02798	14	0.241522	0.0269104	16.2563	92.8571	RB1 (4.29 %) PRKDC (4.29 %) MAPK8 (0.61 %)	0.00846257	0.0168535	0.0251735	0.033423	0.00846257	0.211766	0.225051	0.334976	0.17053	0.156311	0.0814747	0.0251735	0.275987	0.0251735	0.263576	0.218437	0.0657289	0.0497133	0.0251735	0.0416027	0.17755	0.0168535	0.0251735	0.033423	0.0657289	0.0736353	0.134524	0.0736353	0.0892478	0.0416027	0.0416027	0.0251735	0.0657289	0.0416027	0.0416027	0.0657289	0.0168535	0.17755	0.0814747	0.112175
PITX2 PATHWAY	15	112548	8.02798	14	0.241522	0.0269104	16.2563	78.5714	APC (6.7 %) GSK3B (1.2 %) CTNNB1 (1.2 %)	0.00846257	0.0168535	0.0251735	0.033423	0.00846257	0.211766	0.225051	0.334976	0.17053	0.156311	0.0814747	0.0251735	0.275987	0.0251735	0.263576	0.218437	0.0657289	0.0497133	0.0251735	0.0416027	0.17755	0.0168535	0.0251735	0.033423	0.0657289	0.0736353	0.134524	0.0736353	0.0892478	0.0416027	0.0416027	0.0251735	0.0657289	0.0416027	0.0416027	0.0657289	0.0168535	0.17755	0.0814747	0.112175
MEIOSIS	116	486788	10.4996	17	0.209277	0.0286601	17.1573	94.1176	ATM (7.98 %) BRCA2 (1.23 %) ATR (0.61 %) BRCA1 (0.61 %)	0.0112675	0.022408	0.033423	0.0443139	0.0112675	0.271873	0.288189	0.419525	0.220647	0.202783	0.10713	0.033423	0.349878	0.033423	0.334976	0.280078	0.0866641	0.0657289	0.033423	0.0550821	0.229429	0.022408	0.033423	0.0443139	0.0866641	0.0969551	0.175217	0.0969551	0.117191	0.0550821	0.0550821	0.033423	0.0866641	0.0550821	0.0550821	0.0866641	0.022408	0.229429	0.10713	0.146697
FANCONI ANEMIA PATHWAY	25	126847	10.4996	17	0.209277	0.0286601	17.1573	94.1176	ATM (7.98 %) BRCA2 (1.23 %) ATR (0.61 %) BRCA1 (0.61 %)	0.0112675	0.022408	0.033423	0.0443139	0.0112675	0.271873	0.288189	0.419525	0.220647	0.202783	0.10713	0.033423	0.349878	0.033423	0.334976	0.280078	0.0866641	0.0657289	0.033423	0.0550821	0.229429	0.022408	0.033423	0.0443139	0.0866641	0.0969551	0.175217	0.0969551	0.117191	0.0550821	0.0550821	0.033423	0.0866641	0.0550821	0.0550821	0.0866641	0.022408	0.229429	0.10713	0.146697
P38 MKK3 6PATHWAY	26	166431	17.3904	25	0.157632	0.0312383	18.6169	92	ATM (7.98 %) MAP3K3 (1.84 %) MAP3K6 (1.84 %) MAP3K4 (1.84 %) MAP3K10 (1.23 %) MAP2K6 (0.61 %) TAOK3 (0.61 %)	0.0196347	0.0388839	0.0577551	0.0762558	0.0196347	0.426066	0.448383	0.61397	0.353551	0.327397	0.179876	0.0577551	0.529303	0.0577551	0.51026	0.437335	0.146697	0.112175	0.0577551	0.0943933	0.366244	0.0388839	0.0577551	0.0762558	0.146697	0.163451	0.28617	0.163451	0.195979	0.0943933	0.0943933	0.0577551	0.146697	0.0943933	0.0943933	0.146697	0.0388839	0.366244	0.179876	0.242416
RB 1PATHWAY	65	396807	19.5303	27	0.140654	0.0393556	23.2461	92.5926	CDKN2A (5.52 %) RB1 (4.29 %) TFDP1 (2.45 %) MET (1.84 %) ABL1 (1.23 %) MDM2 (1.23 %) CCNE1 (0.61 %) RAF1 (0.61 %)	0.022408	0.0443139	0.0657289	0.0866641	0.022408	0.469832	0.493326	0.663049	0.39261	0.364446	0.202783	0.0657289	0.577341	0.0657289	0.557743	0.481712	0.165818	0.127138	0.0657289	0.10713	0.40622	0.0443139	0.0657289	0.0866641	0.165818	0.18451	0.319732	0.18451	0.220647	0.10713	0.10713	0.0657289	0.165818	0.10713	0.10713	0.165818	0.0443139	0.40622	0.202783	0.271873
DNA REPAIR	112	622006	19.5303	27	0.140654	0.0393556	23.2461	96.2963	ATM (7.98 %) PRKDC (4.29 %) BRCA2 (1.23 %) CDK7 (0.61 %) ERCC2 (0.61 %) ATR (0.61 %) BRCA1 (0.61 %) XRCC1 (0.61 %)	0.022408	0.0443139	0.0657289	0.0866641	0.022408	0.469832	0.493326	0.663049	0.39261	0.364446	0.202783	0.0657289	0.577341	0.0657289	0.557743	0.481712	0.165818	0.127138	0.0657289	0.10713	0.40622	0.0443139	0.0657289	0.0866641	0.165818	0.18451	0.319732	0.18451	0.220647	0.10713	0.10713	0.0657289	0.165818	0.10713	0.10713	0.165818	0.0443139	0.40622	0.202783	0.271873
KERATINOCYTE PATHWAY	46	293075	34.413	43	0.0967464	0.0439407	25.8395	79.0698	EGFR (18.40 %) PRKCG ( 2.45 %) PRKCE ( 1.84 %) PRKCB ( 1.23 %) FOS ( 1.23 %) HRAS ( 0.61 %) MAPK8 ( 0.61 %) RAF1 ( 0.61 %) RELA ( 0.61 %) RIPK1 ( 0.61 %) PRKCH ( 0.61 %) PRKCD ( 0.61 %) PRKCQ ( 0.61 %) IKBKB ( 0.61 %) MAP2K6 ( 0.61 %) ETS1 ( 0.61 %)	0.0443139	0.0866641	0.127138	0.165818	0.0443139	0.718922	0.743281	0.886464	0.631077	0.596071	0.364446	0.127138	0.821359	0.127138	0.804409	0.731377	0.30414	0.238111	0.127138	0.202783	0.647425	0.0866641	0.127138	0.165818	0.30414	0.334976	0.537236	0.334976	0.39261	0.202783	0.202783	0.127138	0.30414	0.202783	0.202783	0.30414	0.0866641	0.647425	0.364446	0.469832
REG CASCADE OF CYCLIN EXPR	13	46088	5.45893	10	0.262893	0.0447328	25.9607	100	CDKN2A (5.52 %) CCNE1 (0.61 %)	0.0056497	0.0112675	0.0168535	0.022408	0.0056497	0.146697	0.156311	0.238111	0.117191	0.10713	0.0550821	0.0168535	0.193698	0.0168535	0.18451	0.151518	0.0443139	0.033423	0.0168535	0.0279311	0.122178	0.0112675	0.0168535	0.022408	0.0443139	0.0497133	0.0918242	0.0497133	0.0604206	0.0279311	0.0279311	0.0168535	0.0443139	0.0279311	0.0279311	0.0443139	0.0112675	0.122178	0.0550821	0.0762558
FRA PATHWAY	37	186678	5.45893	10	0.262893	0.0447328	25.9607	100	CDKN2A (5.52 %) JUNB (0.61 %)	0.0056497	0.0112675	0.0168535	0.022408	0.0056497	0.146697	0.156311	0.238111	0.117191	0.10713	0.0550821	0.0168535	0.193698	0.0168535	0.18451	0.151518	0.0443139	0.033423	0.0168535	0.0279311	0.122178	0.0112675	0.0168535	0.022408	0.0443139	0.0497133	0.0918242	0.0497133	0.0604206	0.0279311	0.0279311	0.0168535	0.0443139	0.0279311	0.0279311	0.0443139	0.0112675	0.122178	0.0550821	0.0762558
G ALPHA S SIGNALLING EVENTS	121	544651	5.45893	10	0.262893	0.0447328	25.9607	100	GNAS (4.3 %) TSHR (1.8 %)	0.0056497	0.0112675	0.0168535	0.022408	0.0056497	0.146697	0.156311	0.238111	0.117191	0.10713	0.0550821	0.0168535	0.193698	0.0168535	0.18451	0.151518	0.0443139	0.033423	0.0168535	0.0279311	0.122178	0.0112675	0.0168535	0.022408	0.0443139	0.0497133	0.0918242	0.0497133	0.0604206	0.0279311	0.0279311	0.0168535	0.0443139	0.0279311	0.0279311	0.0443139	0.0112675	0.122178	0.0550821	0.0762558
ATM PATHWAY	34	268496	12.8801	19	0.168836	0.0483796	27.955	89.4737	ATM (7.98 %) CDC25A (1.23 %) ABL1 (1.23 %) MDM2 (1.23 %) BRCA1 (0.61 %)	0.0140645	0.0279311	0.0416027	0.0550821	0.0140645	0.327397	0.346184	0.493326	0.267736	0.246696	0.132069	0.0416027	0.416227	0.0416027	0.399453	0.336857	0.10713	0.0814747	0.0416027	0.0683719	0.278035	0.0279311	0.0416027	0.0550821	0.10713	0.119688	0.213996	0.119688	0.144276	0.0683719	0.0683719	0.0416027	0.10713	0.0683719	0.0683719	0.10713	0.0279311	0.278035	0.132069	0.179876
E2F PATHWAY	74	413869	31.0188	39	0.0994396	0.0516596	29.721	69.2308	ATM (7.98 %) CDKN2A (5.52 %) RB1 (4.29 %) RBL1 (2.45 %) TFDP1 (2.45 %) MYC (1.23 %) RBL2 (1.23 %) MYBL2 (1.23 %) CDC25A (1.23 %) CCNE1 (0.61 %) BRCA1 (0.61 %) TP73 (0.61 %) XRCC1 (0.61 %) CDKN2C (0.61 %)	0.0388839	0.0762558	0.112175	0.146697	0.0388839	0.6706	0.695718	0.850981	0.582103	0.547606	0.327397	0.112175	0.778444	0.112175	0.760155	0.683408	0.271873	0.211766	0.112175	0.179876	0.598353	0.0762558	0.112175	0.146697	0.271873	0.300186	0.490447	0.300186	0.353551	0.179876	0.179876	0.112175	0.271873	0.179876	0.179876	0.271873	0.0762558	0.598353	0.327397	0.426066
CDC42 REG PATHWAY	30	256722	10.4996	16	0.182948	0.0540478	30.5319	87.5	APC (6.75 %) VAV2 (1.23 %) VAV3 (1.23 %) PLCG1 (0.61 %)	0.0112675	0.022408	0.033423	0.0443139	0.0112675	0.271873	0.288189	0.419525	0.220647	0.202783	0.10713	0.033423	0.349878	0.033423	0.334976	0.280078	0.0866641	0.0657289	0.033423	0.0550821	0.229429	0.022408	0.033423	0.0443139	0.0866641	0.0969551	0.175217	0.0969551	0.117191	0.0550821	0.0550821	0.033423	0.0866641	0.0550821	0.0550821	0.0866641	0.022408	0.229429	0.10713	0.146697
VEGF VEGFR PATHWAY	10	79590	10.4996	16	0.182948	0.0540478	30.5319	87.5	KDR (4.9 %) FLT1 (2.5 %) FLT4 (2.5 %) VEGFC (1.2 %)	0.0112675	0.022408	0.033423	0.0443139	0.0112675	0.271873	0.288189	0.419525	0.220647	0.202783	0.10713	0.033423	0.349878	0.033423	0.334976	0.280078	0.0866641	0.0657289	0.033423	0.0550821	0.229429	0.022408	0.033423	0.0443139	0.0866641	0.0969551	0.175217	0.0969551	0.117191	0.0550821	0.0550821	0.033423	0.0866641	0.0550821	0.0550821	0.0866641	0.022408	0.229429	0.10713	0.146697
VEGF LIGAND RECEPTOR INTERACTIONS	10	79221	10.4996	16	0.182948	0.0540478	30.5319	87.5	KDR (4.9 %) FLT1 (2.5 %) FLT4 (2.5 %) VEGFC (1.2 %)	0.0112675	0.022408	0.033423	0.0443139	0.0112675	0.271873	0.288189	0.419525	0.220647	0.202783	0.10713	0.033423	0.349878	0.033423	0.334976	0.280078	0.0866641	0.0657289	0.033423	0.0550821	0.229429	0.022408	0.033423	0.0443139	0.0866641	0.0969551	0.175217	0.0969551	0.117191	0.0550821	0.0550821	0.033423	0.0866641	0.0550821	0.0550821	0.0866641	0.022408	0.229429	0.10713	0.146697
G2 M CHECKPOINTS	45	211621	10.4996	16	0.182948	0.0540478	30.5319	87.5	ATM (7.98 %) CDC25A (1.23 %) CHEK1 (0.61 %) ATR (0.61 %)	0.0112675	0.022408	0.033423	0.0443139	0.0112675	0.271873	0.288189	0.419525	0.220647	0.202783	0.10713	0.033423	0.349878	0.033423	0.334976	0.280078	0.0866641	0.0657289	0.033423	0.0550821	0.229429	0.022408	0.033423	0.0443139	0.0866641	0.0969551	0.175217	0.0969551	0.117191	0.0550821	0.0550821	0.033423	0.0866641	0.0550821	0.0550821	0.0866641	0.022408	0.229429	0.10713	0.146697
GRANULE CELL SURVIVAL PATHWAY	27	173396	8.02798	13	0.209337	0.0542177	30.5319	76.9231	APC (6.75 %) FOS (1.23 %) MAPK8 (0.61 %)	0.00846257	0.0168535	0.0251735	0.033423	0.00846257	0.211766	0.225051	0.334976	0.17053	0.156311	0.0814747	0.0251735	0.275987	0.0251735	0.263576	0.218437	0.0657289	0.0497133	0.0251735	0.0416027	0.17755	0.0168535	0.0251735	0.033423	0.0657289	0.0736353	0.134524	0.0736353	0.0892478	0.0416027	0.0416027	0.0251735	0.0657289	0.0416027	0.0416027	0.0657289	0.0168535	0.17755	0.0814747	0.112175
G1 PHASE	38	188648	19.5303	26	0.124264	0.0645371	36.1898	88.4615	CDKN2A (5.52 %) RB1 (4.29 %) RBL1 (2.45 %) TFDP1 (2.45 %) RBL2 (1.23 %) CDK7 (0.61 %) CDKN2B (0.61 %) CDKN2C (0.61 %)	0.022408	0.0443139	0.0657289	0.0866641	0.022408	0.469832	0.493326	0.663049	0.39261	0.364446	0.202783	0.0657289	0.577341	0.0657289	0.557743	0.481712	0.165818	0.127138	0.0657289	0.10713	0.40622	0.0443139	0.0657289	0.0866641	0.165818	0.18451	0.319732	0.18451	0.220647	0.10713	0.10713	0.0657289	0.165818	0.10713	0.10713	0.165818	0.0443139	0.40622	0.202783	0.271873
FANCONI PATHWAY	47	287025	12.8801	18	0.145355	0.0833081	46.5195	94.4444	ATM (7.98 %) BRCA2 (1.23 %) BRCA1 (0.61 %) CHEK1 (0.61 %) ATR (0.61 %)	0.0140645	0.0279311	0.0416027	0.0550821	0.0140645	0.327397	0.346184	0.493326	0.267736	0.246696	0.132069	0.0416027	0.416227	0.0416027	0.399453	0.336857	0.10713	0.0814747	0.0416027	0.0683719	0.278035	0.0279311	0.0416027	0.0550821	0.10713	0.119688	0.213996	0.119688	0.144276	0.0683719	0.0683719	0.0416027	0.10713	0.0683719	0.0683719	0.10713	0.0279311	0.278035	0.132069	0.179876
ATF2 PATHWAY	59	350404	17.3904	23	0.121419	0.0863956	48.0417	69.5652	NF1 (7.98 %) RB1 (4.29 %) PDGFRA (3.68 %) FOS (1.23 %) JUNB (0.61 %) MAPK8 (0.61 %) BRCA1 (0.61 %)	0.0196347	0.0388839	0.0577551	0.0762558	0.0196347	0.426066	0.448383	0.61397	0.353551	0.327397	0.179876	0.0577551	0.529303	0.0577551	0.51026	0.437335	0.146697	0.112175	0.0577551	0.0943933	0.366244	0.0388839	0.0577551	0.0762558	0.146697	0.163451	0.28617	0.163451	0.195979	0.0943933	0.0943933	0.0577551	0.146697	0.0943933	0.0943933	0.146697	0.0388839	0.366244	0.179876	0.242416
PS1 PATHWAY	14	96109	10.4996	15	0.154919	0.0955685	52.0535	73.3333	APC (6.7 %) NOTCH1 (1.2 %) GSK3B (1.2 %) CTNNB1 (1.2 %)	0.0112675	0.022408	0.033423	0.0443139	0.0112675	0.271873	0.288189	0.419525	0.220647	0.202783	0.10713	0.033423	0.349878	0.033423	0.334976	0.280078	0.0866641	0.0657289	0.033423	0.0550821	0.229429	0.022408	0.033423	0.0443139	0.0866641	0.0969551	0.175217	0.0969551	0.117191	0.0550821	0.0550821	0.033423	0.0866641	0.0550821	0.0550821	0.0866641	0.022408	0.229429	0.10713	0.146697
BETA CATENIN DEG PATHWAY	18	142062	10.4996	15	0.154919	0.0955685	52.0535	73.3333	APC (6.75 %) GSK3B (1.23 %) CTNNB1 (1.23 %) GSK3A (0.61 %)	0.0112675	0.022408	0.033423	0.0443139	0.0112675	0.271873	0.288189	0.419525	0.220647	0.202783	0.10713	0.033423	0.349878	0.033423	0.334976	0.280078	0.0866641	0.0657289	0.033423	0.0550821	0.229429	0.022408	0.033423	0.0443139	0.0866641	0.0969551	0.175217	0.0969551	0.117191	0.0550821	0.0550821	0.033423	0.0866641	0.0550821	0.0550821	0.0866641	0.022408	0.229429	0.10713	0.146697
WNT CANONICAL PATHWAY	20	126013	10.4996	15	0.154919	0.0955685	52.0535	73.3333	APC (6.75 %) GSK3B (1.23 %) CTNNB1 (1.23 %) GSK3A (0.61 %)	0.0112675	0.022408	0.033423	0.0443139	0.0112675	0.271873	0.288189	0.419525	0.220647	0.202783	0.10713	0.033423	0.349878	0.033423	0.334976	0.280078	0.0866641	0.0657289	0.033423	0.0550821	0.229429	0.022408	0.033423	0.0443139	0.0866641	0.0969551	0.175217	0.0969551	0.117191	0.0550821	0.0550821	0.033423	0.0866641	0.0550821	0.0550821	0.0866641	0.022408	0.229429	0.10713	0.146697
MYC PATHWAY	25	143040	10.4996	15	0.154919	0.0955685	52.0535	100	CDKN2A (5.5 %) GSK3B (1.2 %) MYC (1.2 %) FBXW7 (1.2 %)	0.0112675	0.022408	0.033423	0.0443139	0.0112675	0.271873	0.288189	0.419525	0.220647	0.202783	0.10713	0.033423	0.349878	0.033423	0.334976	0.280078	0.0866641	0.0657289	0.033423	0.0550821	0.229429	0.022408	0.033423	0.0443139	0.0866641	0.0969551	0.175217	0.0969551	0.117191	0.0550821	0.0550821	0.033423	0.0866641	0.0550821	0.0550821	0.0866641	0.022408	0.229429	0.10713	0.146697
NUCLEAR SIGNALING BY ERBB4	38	231703	10.4996	15	0.154919	0.0955685	52.0535	86.6667	ERBB4 (4.91 %) JAK2 (3.07 %) STAT5B (1.23 %) STAT5A (0.61 %)	0.0112675	0.022408	0.033423	0.0443139	0.0112675	0.271873	0.288189	0.419525	0.220647	0.202783	0.10713	0.033423	0.349878	0.033423	0.334976	0.280078	0.0866641	0.0657289	0.033423	0.0550821	0.229429	0.022408	0.033423	0.0443139	0.0866641	0.0969551	0.175217	0.0969551	0.117191	0.0550821	0.0550821	0.033423	0.0866641	0.0550821	0.0550821	0.0866641	0.022408	0.229429	0.10713	0.146697
SKP2E2F PATHWAY	10	43355	8.02798	12	0.174575	0.101257	54.0443	100	RB1 (4.29 %) TFDP1 (2.45 %) CCNE1 (0.61 %)	0.00846257	0.0168535	0.0251735	0.033423	0.00846257	0.211766	0.225051	0.334976	0.17053	0.156311	0.0814747	0.0251735	0.275987	0.0251735	0.263576	0.218437	0.0657289	0.0497133	0.0251735	0.0416027	0.17755	0.0168535	0.0251735	0.033423	0.0657289	0.0736353	0.134524	0.0736353	0.0892478	0.0416027	0.0416027	0.0251735	0.0657289	0.0416027	0.0416027	0.0657289	0.0168535	0.17755	0.0814747	0.112175
P27 PATHWAY	13	52964	8.02798	12	0.174575	0.101257	54.0443	100	RB1 (4.29 %) TFDP1 (2.45 %) CCNE1 (0.61 %)	0.00846257	0.0168535	0.0251735	0.033423	0.00846257	0.211766	0.225051	0.334976	0.17053	0.156311	0.0814747	0.0251735	0.275987	0.0251735	0.263576	0.218437	0.0657289	0.0497133	0.0251735	0.0416027	0.17755	0.0168535	0.0251735	0.033423	0.0657289	0.0736353	0.134524	0.0736353	0.0892478	0.0416027	0.0416027	0.0251735	0.0657289	0.0416027	0.0416027	0.0657289	0.0168535	0.17755	0.0814747	0.112175
INTEGRIN3 PATHWAY	43	296839	8.02798	12	0.174575	0.101257	54.0443	100	KDR (4.91 %) PDGFRB (1.84 %) TGFBR2 (0.61 %)	0.00846257	0.0168535	0.0251735	0.033423	0.00846257	0.211766	0.225051	0.334976	0.17053	0.156311	0.0814747	0.0251735	0.275987	0.0251735	0.263576	0.218437	0.0657289	0.0497133	0.0251735	0.0416027	0.17755	0.0168535	0.0251735	0.033423	0.0657289	0.0736353	0.134524	0.0736353	0.0892478	0.0416027	0.0416027	0.0251735	0.0657289	0.0416027	0.0416027	0.0657289	0.0168535	0.17755	0.0814747	0.112175
S1P S1P1 PATHWAY	21	162354	8.02798	12	0.174575	0.101257	54.0443	100	KDR (4.91 %) PDGFRB (1.84 %) PLCG1 (0.61 %)	0.00846257	0.0168535	0.0251735	0.033423	0.00846257	0.211766	0.225051	0.334976	0.17053	0.156311	0.0814747	0.0251735	0.275987	0.0251735	0.263576	0.218437	0.0657289	0.0497133	0.0251735	0.0416027	0.17755	0.0168535	0.0251735	0.033423	0.0657289	0.0736353	0.134524	0.0736353	0.0892478	0.0416027	0.0416027	0.0251735	0.0657289	0.0416027	0.0416027	0.0657289	0.0168535	0.17755	0.0814747	0.112175
FGFR LIGAND BINDING AND ACTIVATION	22	95181	8.02798	12	0.174575	0.101257	54.0443	91.6667	FGFR4 (4.3 %) FGFR1 (1.8 %) FGFR2 (1.8 %)	0.00846257	0.0168535	0.0251735	0.033423	0.00846257	0.211766	0.225051	0.334976	0.17053	0.156311	0.0814747	0.0251735	0.275987	0.0251735	0.263576	0.218437	0.0657289	0.0497133	0.0251735	0.0416027	0.17755	0.0168535	0.0251735	0.033423	0.0657289	0.0736353	0.134524	0.0736353	0.0892478	0.0416027	0.0416027	0.0251735	0.0657289	0.0416027	0.0416027	0.0657289	0.0168535	0.17755	0.0814747	0.112175
EGF PATHWAY	31	205309	32.7398	39	0.0759886	0.106483	56.6063	71.7949	EGFR (18.40 %) PRKCB ( 1.23 %) JAK1 ( 1.23 %) STAT5B ( 1.23 %) FOS ( 1.23 %) HRAS ( 0.61 %) MAPK8 ( 0.61 %) STAT3 ( 0.61 %) RAF1 ( 0.61 %) SHC1 ( 0.61 %) STAT2 ( 0.61 %) PIK3CA ( 0.61 %) PLCG1 ( 0.61 %) STAT5A ( 0.61 %) STAT6 ( 0.61 %)	0.0416027	0.0814747	0.119688	0.156311	0.0416027	0.695718	0.72051	0.869927	0.607353	0.572525	0.346184	0.119688	0.801056	0.119688	0.783409	0.708377	0.288189	0.225051	0.119688	0.191411	0.623688	0.0814747	0.119688	0.156311	0.288189	0.317803	0.514405	0.317803	0.373384	0.191411	0.191411	0.119688	0.288189	0.191411	0.191411	0.288189	0.0814747	0.623688	0.346184	0.448383
CELLCYCLE PATHWAY	23	97248	21.5996	27	0.0969172	0.112157	59.1493	88.8889	CDKN2A (5.52 %) RB1 (4.29 %) TFDP1 (2.45 %) RBL1 (2.45 %) CDC25A (1.23 %) CDKN2B (0.61 %) CDKN2C (0.61 %) CDK7 (0.61 %) CCNE1 (0.61 %)	0.0251735	0.0497133	0.0736353	0.0969551	0.0251735	0.51026	0.534607	0.705888	0.429309	0.399453	0.225051	0.0736353	0.620476	0.0736353	0.600622	0.522589	0.18451	0.141848	0.0736353	0.119688	0.443675	0.0497133	0.0736353	0.0969551	0.18451	0.205039	0.351717	0.205039	0.244559	0.119688	0.119688	0.0736353	0.18451	0.119688	0.119688	0.18451	0.0497133	0.443675	0.225051	0.300186
HES HEY PATHWAY	48	298328	21.5996	27	0.0969172	0.112157	59.1493	88.8889	KDR (4.91 %) RB1 (4.29 %) JAK2 (3.07 %) MAML1 (1.84 %) MYB (1.23 %) NOTCH1 (1.23 %) GATA1 (1.23 %) STAT3 (0.61 %) MAML2 (0.61 %)	0.0251735	0.0497133	0.0736353	0.0969551	0.0251735	0.51026	0.534607	0.705888	0.429309	0.399453	0.225051	0.0736353	0.620476	0.0736353	0.600622	0.522589	0.18451	0.141848	0.0736353	0.119688	0.443675	0.0497133	0.0736353	0.0969551	0.18451	0.205039	0.351717	0.205039	0.244559	0.119688	0.119688	0.0736353	0.18451	0.119688	0.119688	0.18451	0.0497133	0.443675	0.225051	0.300186
REGULATION OF AUTOPHAGY	35	132198	2.78547	5	0.254072	0.146103	75.2602	80	PIK3C3 (3.1 %)	0.00282885	0.0056497	0.00846257	0.0112675	0.00282885	0.0762558	0.0814747	0.127138	0.0604206	0.0550821	0.0279311	0.00846257	0.102057	0.00846257	0.0969551	0.078869	0.022408	0.0168535	0.00846257	0.0140645	0.0630785	0.0056497	0.00846257	0.0112675	0.022408	0.0251735	0.0470174	0.0251735	0.030681	0.0140645	0.0140645	0.00846257	0.022408	0.0140645	0.0140645	0.022408	0.0056497	0.0630785	0.0279311	0.0388839
METABOLISM OF AMINO ACIDS AND DERIVATIVES	200	896213	2.78547	5	0.254072	0.146103	75.2602	100	INHBA (3.1 %)	0.00282885	0.0056497	0.00846257	0.0112675	0.00282885	0.0762558	0.0814747	0.127138	0.0604206	0.0550821	0.0279311	0.00846257	0.102057	0.00846257	0.0969551	0.078869	0.022408	0.0168535	0.00846257	0.0140645	0.0630785	0.0056497	0.00846257	0.0112675	0.022408	0.0251735	0.0470174	0.0251735	0.030681	0.0140645	0.0140645	0.00846257	0.022408	0.0140645	0.0140645	0.022408	0.0056497	0.0630785	0.0279311	0.0388839
GLYCOPROTEIN HORMONES	12	25384	2.78547	5	0.254072	0.146103	75.2602	100	INHBA (3.1 %)	0.00282885	0.0056497	0.00846257	0.0112675	0.00282885	0.0762558	0.0814747	0.127138	0.0604206	0.0550821	0.0279311	0.00846257	0.102057	0.00846257	0.0969551	0.078869	0.022408	0.0168535	0.00846257	0.0140645	0.0630785	0.0056497	0.00846257	0.0112675	0.022408	0.0251735	0.0470174	0.0251735	0.030681	0.0140645	0.0140645	0.00846257	0.022408	0.0140645	0.0140645	0.022408	0.0056497	0.0630785	0.0279311	0.0388839
PEPTIDE HORMONE BIOSYNTHESIS	14	32229	2.78547	5	0.254072	0.146103	75.2602	100	INHBA (3.1 %)	0.00282885	0.0056497	0.00846257	0.0112675	0.00282885	0.0762558	0.0814747	0.127138	0.0604206	0.0550821	0.0279311	0.00846257	0.102057	0.00846257	0.0969551	0.078869	0.022408	0.0168535	0.00846257	0.0140645	0.0630785	0.0056497	0.00846257	0.0112675	0.022408	0.0251735	0.0470174	0.0251735	0.030681	0.0140645	0.0140645	0.00846257	0.022408	0.0140645	0.0140645	0.022408	0.0056497	0.0630785	0.0279311	0.0388839
TELOMERE MAINTENANCE	75	195377	2.78547	5	0.254072	0.146103	75.2602	100	TERT (3.1 %)	0.00282885	0.0056497	0.00846257	0.0112675	0.00282885	0.0762558	0.0814747	0.127138	0.0604206	0.0550821	0.0279311	0.00846257	0.102057	0.00846257	0.0969551	0.078869	0.022408	0.0168535	0.00846257	0.0140645	0.0630785	0.0056497	0.00846257	0.0112675	0.022408	0.0251735	0.0470174	0.0251735	0.030681	0.0140645	0.0140645	0.00846257	0.022408	0.0140645	0.0140645	0.022408	0.0056497	0.0630785	0.0279311	0.0388839
EXTENSION OF TELOMERES	27	119240	2.78547	5	0.254072	0.146103	75.2602	100	TERT (3.1 %)	0.00282885	0.0056497	0.00846257	0.0112675	0.00282885	0.0762558	0.0814747	0.127138	0.0604206	0.0550821	0.0279311	0.00846257	0.102057	0.00846257	0.0969551	0.078869	0.022408	0.0168535	0.00846257	0.0140645	0.0630785	0.0056497	0.00846257	0.0112675	0.022408	0.0251735	0.0470174	0.0251735	0.030681	0.0140645	0.0140645	0.00846257	0.022408	0.0140645	0.0140645	0.022408	0.0056497	0.0630785	0.0279311	0.0388839
TNFR1 PATHWAY	29	183032	10.4996	14	0.124956	0.15827	80.5902	85.7143	RB1 (4.29 %) PRKDC (4.29 %) MAPK8 (0.61 %) RIPK1 (0.61 %)	0.0112675	0.022408	0.033423	0.0443139	0.0112675	0.271873	0.288189	0.419525	0.220647	0.202783	0.10713	0.033423	0.349878	0.033423	0.334976	0.280078	0.0866641	0.0657289	0.033423	0.0550821	0.229429	0.022408	0.033423	0.0443139	0.0866641	0.0969551	0.175217	0.0969551	0.117191	0.0550821	0.0550821	0.033423	0.0866641	0.0550821	0.0550821	0.0866641	0.022408	0.229429	0.10713	0.146697
HIF2PATHWAY	34	214648	10.4996	14	0.124956	0.15827	80.5902	100	KDR (4.91 %) FLT1 (2.45 %) ETS1 (0.61 %) VHL (0.61 %)	0.0112675	0.022408	0.033423	0.0443139	0.0112675	0.271873	0.288189	0.419525	0.220647	0.202783	0.10713	0.033423	0.349878	0.033423	0.334976	0.280078	0.0866641	0.0657289	0.033423	0.0550821	0.229429	0.022408	0.033423	0.0443139	0.0866641	0.0969551	0.175217	0.0969551	0.117191	0.0550821	0.0550821	0.033423	0.0866641	0.0550821	0.0550821	0.0866641	0.022408	0.229429	0.10713	0.146697
E2F MEDIATED REGULATION OF DNA REPLICATION	35	162346	10.4996	14	0.124956	0.15827	80.5902	100	RB1 (4.29 %) TFDP1 (2.45 %) CDC25A (1.23 %) CCNE1 (0.61 %)	0.0112675	0.022408	0.033423	0.0443139	0.0112675	0.271873	0.288189	0.419525	0.220647	0.202783	0.10713	0.033423	0.349878	0.033423	0.334976	0.280078	0.0866641	0.0657289	0.033423	0.0550821	0.229429	0.022408	0.033423	0.0443139	0.0866641	0.0969551	0.175217	0.0969551	0.117191	0.0550821	0.0550821	0.033423	0.0866641	0.0550821	0.0550821	0.0866641	0.022408	0.229429	0.10713	0.146697
CFTR PATHWAY	12	75080	8.02798	11	0.136786	0.174931	88.7341	100	GNAS (4.29 %) PRKACB (1.84 %) PRKAR1A (0.61 %)	0.00846257	0.0168535	0.0251735	0.033423	0.00846257	0.211766	0.225051	0.334976	0.17053	0.156311	0.0814747	0.0251735	0.275987	0.0251735	0.263576	0.218437	0.0657289	0.0497133	0.0251735	0.0416027	0.17755	0.0168535	0.0251735	0.033423	0.0657289	0.0736353	0.134524	0.0736353	0.0892478	0.0416027	0.0416027	0.0251735	0.0657289	0.0416027	0.0416027	0.0657289	0.0168535	0.17755	0.0814747	0.112175
PLATELET HOMEOSTASIS	78	508144	5.45893	8	0.165983	0.177662	89.777	100	GNAS (4.29 %) PRKG1 (0.61 %)	0.0056497	0.0112675	0.0168535	0.022408	0.0056497	0.146697	0.156311	0.238111	0.117191	0.10713	0.0550821	0.0168535	0.193698	0.0168535	0.18451	0.151518	0.0443139	0.033423	0.0168535	0.0279311	0.122178	0.0112675	0.0168535	0.022408	0.0443139	0.0497133	0.0918242	0.0497133	0.0604206	0.0279311	0.0279311	0.0168535	0.0443139	0.0279311	0.0279311	0.0443139	0.0112675	0.122178	0.0550821	0.0762558
NO1 PATHWAY	33	208332	17.3904	21	0.0819109	0.197188	99.2661	90.4762	KDR (4.91 %) FLT1 (2.45 %) FLT4 (2.45 %) PRKACB (1.84 %) AKT1 (1.23 %) PRKAR1A (0.61 %) PRKG1 (0.61 %)	0.0196347	0.0388839	0.0577551	0.0762558	0.0196347	0.426066	0.448383	0.61397	0.353551	0.327397	0.179876	0.0577551	0.529303	0.0577551	0.51026	0.437335	0.146697	0.112175	0.0577551	0.0943933	0.366244	0.0388839	0.0577551	0.0762558	0.146697	0.163451	0.28617	0.163451	0.195979	0.0943933	0.0943933	0.0577551	0.146697	0.0943933	0.0943933	0.146697	0.0388839	0.366244	0.179876	0.242416
TGFB PATHWAY	19	166050	12.8801	16	0.0942021	0.207791	100	81.25	APC (6.75 %) SMAD4 (1.23 %) TGFBR2 (0.61 %) TGFBR1 (0.61 %) SMAD2 (0.61 %)	0.0140645	0.0279311	0.0416027	0.0550821	0.0140645	0.327397	0.346184	0.493326	0.267736	0.246696	0.132069	0.0416027	0.416227	0.0416027	0.399453	0.336857	0.10713	0.0814747	0.0416027	0.0683719	0.278035	0.0279311	0.0416027	0.0550821	0.10713	0.119688	0.213996	0.119688	0.144276	0.0683719	0.0683719	0.0416027	0.10713	0.0683719	0.0683719	0.10713	0.0279311	0.278035	0.132069	0.179876
CLASS B 2 SECRETIN FAMILY RECEPTORS	88	349407	10.4996	13	0.0927714	0.245303	100	84.6154	GNAS (4.29 %) PTCH1 (3.07 %) PTCH2 (1.23 %) SMO (0.61 %)	0.0112675	0.022408	0.033423	0.0443139	0.0112675	0.271873	0.288189	0.419525	0.220647	0.202783	0.10713	0.033423	0.349878	0.033423	0.334976	0.280078	0.0866641	0.0657289	0.033423	0.0550821	0.229429	0.022408	0.033423	0.0443139	0.0866641	0.0969551	0.175217	0.0969551	0.117191	0.0550821	0.0550821	0.033423	0.0866641	0.0550821	0.0550821	0.0866641	0.022408	0.229429	0.10713	0.146697
ACTIVATION OF RAC	14	84205	10.4996	13	0.0927714	0.245303	100	100	PAK7 (2.5 %) ROBO1 (2.5 %) PAK4 (1.8 %) PAK6 (1.2 %)	0.0112675	0.022408	0.033423	0.0443139	0.0112675	0.271873	0.288189	0.419525	0.220647	0.202783	0.10713	0.033423	0.349878	0.033423	0.334976	0.280078	0.0866641	0.0657289	0.033423	0.0550821	0.229429	0.022408	0.033423	0.0443139	0.0866641	0.0969551	0.175217	0.0969551	0.117191	0.0550821	0.0550821	0.033423	0.0866641	0.0550821	0.0550821	0.0866641	0.022408	0.229429	0.10713	0.146697
WNT PATHWAY	26	168913	15.1752	18	0.0741377	0.247461	100	72.2222	APC (6.75 %) GSK3B (1.23 %) CTNNB1 (1.23 %) SMAD4 (1.23 %) MYC (1.23 %) NLK (0.61 %)	0.0168535	0.033423	0.0497133	0.0657289	0.0168535	0.378687	0.399453	0.557743	0.31198	0.288189	0.156311	0.0497133	0.475805	0.0497133	0.457679	0.389159	0.127138	0.0969551	0.0497133	0.0814747	0.323576	0.033423	0.0497133	0.0657289	0.127138	0.141848	0.250952	0.141848	0.17053	0.0814747	0.0814747	0.0497133	0.127138	0.0814747	0.0814747	0.127138	0.033423	0.323576	0.156311	0.211766
IL8 CXCR1 PATHWAY	28	188739	15.1752	18	0.0741377	0.247461	100	94.4444	PIK3CG (3.1 %) PRKCG (2.5 %) HCK (1.8 %) PRKCE (1.8 %) PRKCB (1.2 %) AKT1 (1.2 %)	0.0168535	0.033423	0.0497133	0.0657289	0.0168535	0.378687	0.399453	0.557743	0.31198	0.288189	0.156311	0.0497133	0.475805	0.0497133	0.457679	0.389159	0.127138	0.0969551	0.0497133	0.0814747	0.323576	0.033423	0.0497133	0.0657289	0.127138	0.141848	0.250952	0.141848	0.17053	0.0814747	0.0814747	0.0497133	0.127138	0.0814747	0.0814747	0.127138	0.033423	0.323576	0.156311	0.211766
JAK STAT PATHWAY	9	55029	8.02798	10	0.0953935	0.27911	100	90	JAK2 (3.1 %) JAK3 (1.8 %) JAK1 (1.2 %)	0.00846257	0.0168535	0.0251735	0.033423	0.00846257	0.211766	0.225051	0.334976	0.17053	0.156311	0.0814747	0.0251735	0.275987	0.0251735	0.263576	0.218437	0.0657289	0.0497133	0.0251735	0.0416027	0.17755	0.0168535	0.0251735	0.033423	0.0657289	0.0736353	0.134524	0.0736353	0.0892478	0.0416027	0.0416027	0.0251735	0.0657289	0.0416027	0.0416027	0.0657289	0.0168535	0.17755	0.0814747	0.112175
IL8 CXCR2 PATHWAY	34	215028	12.8801	15	0.0661734	0.300866	100	93.3333	PIK3CG (3.1 %) PRKCG (2.5 %) HCK (1.8 %) AKT1 (1.2 %) PRKCB (1.2 %)	0.0140645	0.0279311	0.0416027	0.0550821	0.0140645	0.327397	0.346184	0.493326	0.267736	0.246696	0.132069	0.0416027	0.416227	0.0416027	0.399453	0.336857	0.10713	0.0814747	0.0416027	0.0683719	0.278035	0.0279311	0.0416027	0.0550821	0.10713	0.119688	0.213996	0.119688	0.144276	0.0683719	0.0683719	0.0416027	0.10713	0.0683719	0.0683719	0.10713	0.0279311	0.278035	0.132069	0.179876
MISMATCH REPAIR	23	104296	2.78547	4	0.157162	0.303713	100	100	MSH6 (2.5 %)	0.00282885	0.0056497	0.00846257	0.0112675	0.00282885	0.0762558	0.0814747	0.127138	0.0604206	0.0550821	0.0279311	0.00846257	0.102057	0.00846257	0.0969551	0.078869	0.022408	0.0168535	0.00846257	0.0140645	0.0630785	0.0056497	0.00846257	0.0112675	0.022408	0.0251735	0.0470174	0.0251735	0.030681	0.0140645	0.0140645	0.00846257	0.022408	0.0140645	0.0140645	0.022408	0.0056497	0.0630785	0.0279311	0.0388839
NO2IL12 PATHWAY	17	58988	5.45893	7	0.107991	0.303751	100	100	JAK2 (3.1 %) TYK2 (1.2 %)	0.0056497	0.0112675	0.0168535	0.022408	0.0056497	0.146697	0.156311	0.238111	0.117191	0.10713	0.0550821	0.0168535	0.193698	0.0168535	0.18451	0.151518	0.0443139	0.033423	0.0168535	0.0279311	0.122178	0.0112675	0.0168535	0.022408	0.0443139	0.0497133	0.0918242	0.0497133	0.0604206	0.0279311	0.0279311	0.0168535	0.0443139	0.0279311	0.0279311	0.0443139	0.0112675	0.122178	0.0550821	0.0762558
BARR MAPK PATHWAY	12	97909	5.45893	7	0.107991	0.303751	100	85.7143	GNAS (4.29 %) RAF1 (0.61 %)	0.0056497	0.0112675	0.0168535	0.022408	0.0056497	0.146697	0.156311	0.238111	0.117191	0.10713	0.0550821	0.0168535	0.193698	0.0168535	0.18451	0.151518	0.0443139	0.033423	0.0168535	0.0279311	0.122178	0.0112675	0.0168535	0.022408	0.0443139	0.0497133	0.0918242	0.0497133	0.0604206	0.0279311	0.0279311	0.0168535	0.0443139	0.0279311	0.0279311	0.0443139	0.0112675	0.122178	0.0550821	0.0762558
INTERFERON GAMMA PATHWAY	10	48225	5.45893	7	0.107991	0.303751	100	85.7143	JAK2 (3.1 %) JAK1 (1.2 %)	0.0056497	0.0112675	0.0168535	0.022408	0.0056497	0.146697	0.156311	0.238111	0.117191	0.10713	0.0550821	0.0168535	0.193698	0.0168535	0.18451	0.151518	0.0443139	0.033423	0.0168535	0.0279311	0.122178	0.0112675	0.0168535	0.022408	0.0443139	0.0497133	0.0918242	0.0497133	0.0604206	0.0279311	0.0279311	0.0168535	0.0443139	0.0279311	0.0279311	0.0443139	0.0112675	0.122178	0.0550821	0.0762558
REGULATION OF IFNG SIGNALING	14	58334	5.45893	7	0.107991	0.303751	100	85.7143	JAK2 (3.1 %) JAK1 (1.2 %)	0.0056497	0.0112675	0.0168535	0.022408	0.0056497	0.146697	0.156311	0.238111	0.117191	0.10713	0.0550821	0.0168535	0.193698	0.0168535	0.18451	0.151518	0.0443139	0.033423	0.0168535	0.0279311	0.122178	0.0112675	0.0168535	0.022408	0.0443139	0.0497133	0.0918242	0.0497133	0.0604206	0.0279311	0.0279311	0.0168535	0.0443139	0.0279311	0.0279311	0.0443139	0.0112675	0.122178	0.0550821	0.0762558
MITOTIC G1 G1 S PHASES	137	656446	27.4229	30	0.0390077	0.311061	100	83.3333	CDKN2A (5.52 %) RB1 (4.29 %) RBL1 (2.45 %) TFDP1 (2.45 %) MYBL2 (1.23 %) MYC (1.23 %) RBL2 (1.23 %) CDC25A (1.23 %) CDK7 (0.61 %) CDKN2B (0.61 %) CDKN2C (0.61 %) CCNE1 (0.61 %)	0.033423	0.0657289	0.0969551	0.127138	0.033423	0.61397	0.639344	0.804409	0.526629	0.493326	0.288189	0.0969551	0.72522	0.0969551	0.705888	0.626873	0.238111	0.18451	0.0969551	0.156311	0.54245	0.0657289	0.0969551	0.127138	0.238111	0.263576	0.438927	0.263576	0.31198	0.156311	0.156311	0.0969551	0.238111	0.156311	0.156311	0.238111	0.0657289	0.54245	0.288189	0.378687
SIGNALING	89	496900	15.1752	17	0.0493141	0.342453	100	70.5882	APC (6.75 %) CTNNB1 (1.23 %) GSK3B (1.23 %) MYC (1.23 %) GSK3A (0.61 %) NLK (0.61 %)	0.0168535	0.033423	0.0497133	0.0657289	0.0168535	0.378687	0.399453	0.557743	0.31198	0.288189	0.156311	0.0497133	0.475805	0.0497133	0.457679	0.389159	0.127138	0.0969551	0.0497133	0.0814747	0.323576	0.033423	0.0497133	0.0657289	0.127138	0.141848	0.250952	0.141848	0.17053	0.0814747	0.0814747	0.0497133	0.127138	0.0814747	0.0814747	0.127138	0.033423	0.323576	0.156311	0.211766
REGULATION OF THE ACTIN CYTOSKELETON BY RHO GTPASES	35	216558	15.1752	17	0.0493141	0.342453	100	100	PAK3 (3.07 %) PAK7 (2.45 %) PAK4 (1.84 %) AKT1 (1.23 %) PAK6 (1.23 %) ROCK1 (0.61 %)	0.0168535	0.033423	0.0497133	0.0657289	0.0168535	0.378687	0.399453	0.557743	0.31198	0.288189	0.156311	0.0497133	0.475805	0.0497133	0.457679	0.389159	0.127138	0.0969551	0.0497133	0.0814747	0.323576	0.033423	0.0497133	0.0657289	0.127138	0.141848	0.250952	0.141848	0.17053	0.0814747	0.0814747	0.0497133	0.127138	0.0814747	0.0814747	0.127138	0.033423	0.323576	0.156311	0.211766
NEGATIVE REGULATION OF FGFR SIGNALING	37	186381	15.1752	17	0.0493141	0.342453	100	88.2353	FGFR4 (4.29 %) FGFR1 (1.84 %) FGFR2 (1.84 %) BRAF (1.84 %) MKNK1 (1.23 %) SRC (0.61 %)	0.0168535	0.033423	0.0497133	0.0657289	0.0168535	0.378687	0.399453	0.557743	0.31198	0.288189	0.156311	0.0497133	0.475805	0.0497133	0.457679	0.389159	0.127138	0.0969551	0.0497133	0.0814747	0.323576	0.033423	0.0497133	0.0657289	0.127138	0.141848	0.250952	0.141848	0.17053	0.0814747	0.0814747	0.0497133	0.127138	0.0814747	0.0814747	0.127138	0.033423	0.323576	0.156311	0.211766
GPCR LIGAND BINDING	408	1284592	15.1752	17	0.0493141	0.342453	100	82.3529	GNAS (4.29 %) PTCH1 (3.07 %) TSHR (1.84 %) CYSLTR2 (1.23 %) PTCH2 (1.23 %) SMO (0.61 %)	0.0168535	0.033423	0.0497133	0.0657289	0.0168535	0.378687	0.399453	0.557743	0.31198	0.288189	0.156311	0.0497133	0.475805	0.0497133	0.457679	0.389159	0.127138	0.0969551	0.0497133	0.0814747	0.323576	0.033423	0.0497133	0.0657289	0.127138	0.141848	0.250952	0.141848	0.17053	0.0814747	0.0814747	0.0497133	0.127138	0.0814747	0.0814747	0.127138	0.033423	0.323576	0.156311	0.211766
AGPCR PATHWAY	13	84414	10.4996	12	0.0580093	0.355772	100	91.6667	GNAS (4.29 %) PRKACB (1.84 %) PRKCB (1.23 %) PRKAR1A (0.61 %)	0.0112675	0.022408	0.033423	0.0443139	0.0112675	0.271873	0.288189	0.419525	0.220647	0.202783	0.10713	0.033423	0.349878	0.033423	0.334976	0.280078	0.0866641	0.0657289	0.033423	0.0550821	0.229429	0.022408	0.033423	0.0443139	0.0866641	0.0969551	0.175217	0.0969551	0.117191	0.0550821	0.0550821	0.033423	0.0866641	0.0550821	0.0550821	0.0866641	0.022408	0.229429	0.10713	0.146697
PLCE PATHWAY	12	80560	10.4996	12	0.0580093	0.355772	100	100	GNAS (4.29 %) PRKACB (1.84 %) PRKAR1A (0.61 %) RAP2B (0.61 %)	0.0112675	0.022408	0.033423	0.0443139	0.0112675	0.271873	0.288189	0.419525	0.220647	0.202783	0.10713	0.033423	0.349878	0.033423	0.334976	0.280078	0.0866641	0.0657289	0.033423	0.0550821	0.229429	0.022408	0.033423	0.0443139	0.0866641	0.0969551	0.175217	0.0969551	0.117191	0.0550821	0.0550821	0.033423	0.0866641	0.0550821	0.0550821	0.0866641	0.022408	0.229429	0.10713	0.146697
GLUCAGON SIGNALING IN METABOLIC REGULATION	34	191681	10.4996	12	0.0580093	0.355772	100	100	GNAS (4.29 %) PRKACB (1.84 %) PRKACA (0.61 %) PRKAR1A (0.61 %)	0.0112675	0.022408	0.033423	0.0443139	0.0112675	0.271873	0.288189	0.419525	0.220647	0.202783	0.10713	0.033423	0.349878	0.033423	0.334976	0.280078	0.0866641	0.0657289	0.033423	0.0550821	0.229429	0.022408	0.033423	0.0443139	0.0866641	0.0969551	0.175217	0.0969551	0.117191	0.0550821	0.0550821	0.033423	0.0866641	0.0550821	0.0550821	0.0866641	0.022408	0.229429	0.10713	0.146697
REGULATION OF INSULIN SECRETION BY GLUCAGON LIKE PEPTIDE1	43	252103	10.4996	12	0.0580093	0.355772	100	100	GNAS (4.29 %) PRKACB (1.84 %) PRKACA (0.61 %) PRKAR1A (0.61 %)	0.0112675	0.022408	0.033423	0.0443139	0.0112675	0.271873	0.288189	0.419525	0.220647	0.202783	0.10713	0.033423	0.349878	0.033423	0.334976	0.280078	0.0866641	0.0657289	0.033423	0.0550821	0.229429	0.022408	0.033423	0.0443139	0.0866641	0.0969551	0.175217	0.0969551	0.117191	0.0550821	0.0550821	0.033423	0.0866641	0.0550821	0.0550821	0.0866641	0.022408	0.229429	0.10713	0.146697
AQUAPORIN MEDIATED TRANSPORT	51	267659	10.4996	12	0.0580093	0.355772	100	100	GNAS (4.29 %) PRKACB (1.84 %) PRKACA (0.61 %) PRKAR1A (0.61 %)	0.0112675	0.022408	0.033423	0.0443139	0.0112675	0.271873	0.288189	0.419525	0.220647	0.202783	0.10713	0.033423	0.349878	0.033423	0.334976	0.280078	0.0866641	0.0657289	0.033423	0.0550821	0.229429	0.022408	0.033423	0.0443139	0.0866641	0.0969551	0.175217	0.0969551	0.117191	0.0550821	0.0550821	0.033423	0.0866641	0.0550821	0.0550821	0.0866641	0.022408	0.229429	0.10713	0.146697
REGULATION OF WATER BALANCE BY RENAL AQUAPORINS	44	245096	10.4996	12	0.0580093	0.355772	100	100	GNAS (4.29 %) PRKACB (1.84 %) PRKACA (0.61 %) PRKAR1A (0.61 %)	0.0112675	0.022408	0.033423	0.0443139	0.0112675	0.271873	0.288189	0.419525	0.220647	0.202783	0.10713	0.033423	0.349878	0.033423	0.334976	0.280078	0.0866641	0.0657289	0.033423	0.0550821	0.229429	0.022408	0.033423	0.0443139	0.0866641	0.0969551	0.175217	0.0969551	0.117191	0.0550821	0.0550821	0.033423	0.0866641	0.0550821	0.0550821	0.0866641	0.022408	0.229429	0.10713	0.146697
GSK3 PATHWAY	27	162121	17.3904	19	0.0384452	0.371985	100	78.9474	APC (6.75 %) GSK3B (1.23 %) CTNNB1 (1.23 %) IRAK1 (1.23 %) AKT1 (1.23 %) RELA (0.61 %) PIK3CA (0.61 %)	0.0196347	0.0388839	0.0577551	0.0762558	0.0196347	0.426066	0.448383	0.61397	0.353551	0.327397	0.179876	0.0577551	0.529303	0.0577551	0.51026	0.437335	0.146697	0.112175	0.0577551	0.0943933	0.366244	0.0388839	0.0577551	0.0762558	0.146697	0.163451	0.28617	0.163451	0.195979	0.0943933	0.0943933	0.0577551	0.146697	0.0943933	0.0943933	0.146697	0.0388839	0.366244	0.179876	0.242416
WNT BETA CATENIN PATHWAY	34	213775	17.3904	19	0.0384452	0.371985	100	78.9474	APC (6.75 %) AKT1 (1.23 %) CTNNB1 (1.23 %) GSK3B (1.23 %) RPSA (0.61 %) AKT3 (0.61 %) GSK3A (0.61 %)	0.0196347	0.0388839	0.0577551	0.0762558	0.0196347	0.426066	0.448383	0.61397	0.353551	0.327397	0.179876	0.0577551	0.529303	0.0577551	0.51026	0.437335	0.146697	0.112175	0.0577551	0.0943933	0.366244	0.0388839	0.0577551	0.0762558	0.146697	0.163451	0.28617	0.163451	0.195979	0.0943933	0.0943933	0.0577551	0.146697	0.0943933	0.0943933	0.146697	0.0388839	0.366244	0.179876	0.242416
PS1 PATHWAY	46	294611	17.3904	19	0.0384452	0.371985	100	73.6842	APC (6.75 %) CTNNB1 (1.23 %) NOTCH1 (1.23 %) MYC (1.23 %) FOS (1.23 %) GSK3B (1.23 %) NLK (0.61 %)	0.0196347	0.0388839	0.0577551	0.0762558	0.0196347	0.426066	0.448383	0.61397	0.353551	0.327397	0.179876	0.0577551	0.529303	0.0577551	0.51026	0.437335	0.146697	0.112175	0.0577551	0.0943933	0.366244	0.0388839	0.0577551	0.0762558	0.146697	0.163451	0.28617	0.163451	0.195979	0.0943933	0.0943933	0.0577551	0.146697	0.0943933	0.0943933	0.146697	0.0388839	0.366244	0.179876	0.242416
AR PATHWAY	61	443657	19.5303	21	0.0315095	0.391362	100	85.7143	CDKN2A (5.52 %) PRKDC (4.29 %) AKT1 (1.23 %) VAV3 (1.23 %) CTNNB1 (1.23 %) BRCA1 (0.61 %) RANBP9 (0.61 %) LATS2 (0.61 %)	0.022408	0.0443139	0.0657289	0.0866641	0.022408	0.469832	0.493326	0.663049	0.39261	0.364446	0.202783	0.0657289	0.577341	0.0657289	0.557743	0.481712	0.165818	0.127138	0.0657289	0.10713	0.40622	0.0443139	0.0657289	0.0866641	0.165818	0.18451	0.319732	0.18451	0.220647	0.10713	0.10713	0.0657289	0.165818	0.10713	0.10713	0.165818	0.0443139	0.40622	0.202783	0.271873
TAP63 PATHWAY	54	350165	19.5303	21	0.0315095	0.391362	100	100	CDKN2A (5.52 %) TP63 (2.45 %) MDM2 (1.23 %) ABL1 (1.23 %) PRKCD (0.61 %) JAG1 (0.61 %) BAX (0.61 %) IKBKB (0.61 %)	0.022408	0.0443139	0.0657289	0.0866641	0.022408	0.469832	0.493326	0.663049	0.39261	0.364446	0.202783	0.0657289	0.577341	0.0657289	0.557743	0.481712	0.165818	0.127138	0.0657289	0.10713	0.40622	0.0443139	0.0657289	0.0866641	0.165818	0.18451	0.319732	0.18451	0.220647	0.10713	0.10713	0.0657289	0.165818	0.10713	0.10713	0.165818	0.0443139	0.40622	0.202783	0.271873
IL 13 PATHWAY	7	33663	8.02798	9	0.049636	0.411	100	88.8889	JAK2 (3.1 %) TYK2 (1.2 %) JAK1 (1.2 %)	0.00846257	0.0168535	0.0251735	0.033423	0.00846257	0.211766	0.225051	0.334976	0.17053	0.156311	0.0814747	0.0251735	0.275987	0.0251735	0.263576	0.218437	0.0657289	0.0497133	0.0251735	0.0416027	0.17755	0.0168535	0.0251735	0.033423	0.0657289	0.0736353	0.134524	0.0736353	0.0892478	0.0416027	0.0416027	0.0251735	0.0657289	0.0416027	0.0416027	0.0657289	0.0168535	0.17755	0.0814747	0.112175
REGULATION OF INSULIN SECRETION	93	503125	12.8801	14	0.0362102	0.411382	100	100	GNAS (4.29 %) PRKACB (1.84 %) CTNNB1 (1.23 %) PRKACA (0.61 %) PRKAR1A (0.61 %)	0.0140645	0.0279311	0.0416027	0.0550821	0.0140645	0.327397	0.346184	0.493326	0.267736	0.246696	0.132069	0.0416027	0.416227	0.0416027	0.399453	0.336857	0.10713	0.0814747	0.0416027	0.0683719	0.278035	0.0279311	0.0416027	0.0550821	0.10713	0.119688	0.213996	0.119688	0.144276	0.0683719	0.0683719	0.0416027	0.10713	0.0683719	0.0683719	0.10713	0.0279311	0.278035	0.132069	0.179876
G1 S TRANSITION	112	523314	15.1752	16	0.0229852	0.450492	100	93.75	RB1 (4.29 %) TFDP1 (2.45 %) MYC (1.23 %) CDC25A (1.23 %) CDK7 (0.61 %) CCNE1 (0.61 %)	0.0168535	0.033423	0.0497133	0.0657289	0.0168535	0.378687	0.399453	0.557743	0.31198	0.288189	0.156311	0.0497133	0.475805	0.0497133	0.457679	0.389159	0.127138	0.0969551	0.0497133	0.0814747	0.323576	0.033423	0.0497133	0.0657289	0.127138	0.141848	0.250952	0.141848	0.17053	0.0814747	0.0814747	0.0497133	0.127138	0.0814747	0.0814747	0.127138	0.033423	0.323576	0.156311	0.211766
AKAPCENTROSOME PATHWAY	15	99878	5.45893	6	0.041044	0.466918	100	100	PRKACB (1.8 %) PRKCE (1.8 %)	0.0056497	0.0112675	0.0168535	0.022408	0.0056497	0.146697	0.156311	0.238111	0.117191	0.10713	0.0550821	0.0168535	0.193698	0.0168535	0.18451	0.151518	0.0443139	0.033423	0.0168535	0.0279311	0.122178	0.0112675	0.0168535	0.022408	0.0443139	0.0497133	0.0918242	0.0497133	0.0604206	0.0279311	0.0279311	0.0168535	0.0443139	0.0279311	0.0279311	0.0443139	0.0112675	0.122178	0.0550821	0.0762558
CDC42RAC PATHWAY	16	96689	5.45893	6	0.041044	0.466918	100	83.3333	PDGFRA (3.68 %) PIK3CA (0.61 %)	0.0056497	0.0112675	0.0168535	0.022408	0.0056497	0.146697	0.156311	0.238111	0.117191	0.10713	0.0550821	0.0168535	0.193698	0.0168535	0.18451	0.151518	0.0443139	0.033423	0.0168535	0.0279311	0.122178	0.0112675	0.0168535	0.022408	0.0443139	0.0497133	0.0918242	0.0497133	0.0604206	0.0279311	0.0279311	0.0168535	0.0443139	0.0279311	0.0279311	0.0443139	0.0112675	0.122178	0.0550821	0.0762558
WNT SIGNALING PATHWAY	28	132375	5.45893	6	0.041044	0.466918	100	100	ROR2 (3.07 %) RYK (0.61 %)	0.0056497	0.0112675	0.0168535	0.022408	0.0056497	0.146697	0.156311	0.238111	0.117191	0.10713	0.0550821	0.0168535	0.193698	0.0168535	0.18451	0.151518	0.0443139	0.033423	0.0168535	0.0279311	0.122178	0.0112675	0.0168535	0.022408	0.0443139	0.0497133	0.0918242	0.0497133	0.0604206	0.0279311	0.0279311	0.0168535	0.0443139	0.0279311	0.0279311	0.0443139	0.0112675	0.122178	0.0550821	0.0762558
SYNTHESIS OF PIPS AT THE EARLY ENDOSOME MEMBRANE	12	91954	5.45893	6	0.041044	0.466918	100	83.3333	PIK3C3 (3.1 %) PIK3C2A (1.2 %)	0.0056497	0.0112675	0.0168535	0.022408	0.0056497	0.146697	0.156311	0.238111	0.117191	0.10713	0.0550821	0.0168535	0.193698	0.0168535	0.18451	0.151518	0.0443139	0.033423	0.0168535	0.0279311	0.122178	0.0112675	0.0168535	0.022408	0.0443139	0.0497133	0.0918242	0.0497133	0.0604206	0.0279311	0.0279311	0.0168535	0.0443139	0.0279311	0.0279311	0.0443139	0.0112675	0.122178	0.0550821	0.0762558
SYNTHESIS OF PIPS AT THE LATE ENDOSOME MEMBRANE	10	75764	5.45893	6	0.041044	0.466918	100	83.3333	PIK3C3 (3.1 %) PIK3C2A (1.2 %)	0.0056497	0.0112675	0.0168535	0.022408	0.0056497	0.146697	0.156311	0.238111	0.117191	0.10713	0.0550821	0.0168535	0.193698	0.0168535	0.18451	0.151518	0.0443139	0.033423	0.0168535	0.0279311	0.122178	0.0112675	0.0168535	0.022408	0.0443139	0.0497133	0.0918242	0.0497133	0.0604206	0.0279311	0.0279311	0.0168535	0.0443139	0.0279311	0.0279311	0.0443139	0.0112675	0.122178	0.0550821	0.0762558
TRAFFICKING OF GLUR2 CONTAINING AMPA RECEPTORS	16	128590	5.45893	6	0.041044	0.466918	100	100	PRKCG (2.5 %) PRKCB (1.2 %)	0.0056497	0.0112675	0.0168535	0.022408	0.0056497	0.146697	0.156311	0.238111	0.117191	0.10713	0.0550821	0.0168535	0.193698	0.0168535	0.18451	0.151518	0.0443139	0.033423	0.0168535	0.0279311	0.122178	0.0112675	0.0168535	0.022408	0.0443139	0.0497133	0.0918242	0.0497133	0.0604206	0.0279311	0.0279311	0.0168535	0.0443139	0.0279311	0.0279311	0.0443139	0.0112675	0.122178	0.0550821	0.0762558
ALK PATHWAY	37	215310	17.3904	18	0.0149641	0.476719	100	77.7778	APC (6.75 %) GSK3B (1.23 %) CTNNB1 (1.23 %) SMAD4 (1.23 %) TGFBR2 (0.61 %) TGFBR1 (0.61 %) BMPR1A (0.61 %)	0.0196347	0.0388839	0.0577551	0.0762558	0.0196347	0.426066	0.448383	0.61397	0.353551	0.327397	0.179876	0.0577551	0.529303	0.0577551	0.51026	0.437335	0.146697	0.112175	0.0577551	0.0943933	0.366244	0.0388839	0.0577551	0.0762558	0.146697	0.163451	0.28617	0.163451	0.195979	0.0943933	0.0943933	0.0577551	0.146697	0.0943933	0.0943933	0.146697	0.0388839	0.366244	0.179876	0.242416
SIGNALING BY ROBO RECEPTOR	30	245461	17.3904	18	0.0149641	0.476719	100	83.3333	ROBO2 (3.07 %) PAK7 (2.45 %) ROBO1 (2.45 %) PAK4 (1.84 %) ABL1 (1.23 %) PAK6 (1.23 %) ABL2 (0.61 %)	0.0196347	0.0388839	0.0577551	0.0762558	0.0196347	0.426066	0.448383	0.61397	0.353551	0.327397	0.179876	0.0577551	0.529303	0.0577551	0.51026	0.437335	0.146697	0.112175	0.0577551	0.0943933	0.366244	0.0388839	0.0577551	0.0762558	0.146697	0.163451	0.28617	0.163451	0.195979	0.0943933	0.0943933	0.0577551	0.146697	0.0943933	0.0943933	0.146697	0.0388839	0.366244	0.179876	0.242416
TASTE TRANSDUCTION	52	202690	10.4996	11	0.0202207	0.483213	100	90.9091	GNAS (4.29 %) PRKACB (1.84 %) PRKX (0.61 %) PRKACA (0.61 %)	0.0112675	0.022408	0.033423	0.0443139	0.0112675	0.271873	0.288189	0.419525	0.220647	0.202783	0.10713	0.033423	0.349878	0.033423	0.334976	0.280078	0.0866641	0.0657289	0.033423	0.0550821	0.229429	0.022408	0.033423	0.0443139	0.0866641	0.0969551	0.175217	0.0969551	0.117191	0.0550821	0.0550821	0.033423	0.0866641	0.0550821	0.0550821	0.0866641	0.022408	0.229429	0.10713	0.146697
VASOPRESSIN REGULATED WATER REABSORPTION	44	269348	10.4996	11	0.0202207	0.483213	100	90.9091	GNAS (4.29 %) PRKACB (1.84 %) PRKX (0.61 %) PRKACA (0.61 %)	0.0112675	0.022408	0.033423	0.0443139	0.0112675	0.271873	0.288189	0.419525	0.220647	0.202783	0.10713	0.033423	0.349878	0.033423	0.334976	0.280078	0.0866641	0.0657289	0.033423	0.0550821	0.229429	0.022408	0.033423	0.0443139	0.0866641	0.0969551	0.175217	0.0969551	0.117191	0.0550821	0.0550821	0.033423	0.0866641	0.0550821	0.0550821	0.0866641	0.022408	0.229429	0.10713	0.146697
FOXM1 PATHWAY	40	209276	21.5996	22	0.00797608	0.500346	100	81.8182	CDKN2A (5.52 %) RB1 (4.29 %) MYC (1.23 %) BRCA2 (1.23 %) FOS (1.23 %) CCNE1 (0.61 %) XRCC1 (0.61 %) AURKB (0.61 %) GSK3A (0.61 %)	0.0251735	0.0497133	0.0736353	0.0969551	0.0251735	0.51026	0.534607	0.705888	0.429309	0.399453	0.225051	0.0736353	0.620476	0.0736353	0.600622	0.522589	0.18451	0.141848	0.0736353	0.119688	0.443675	0.0497133	0.0736353	0.0969551	0.18451	0.205039	0.351717	0.205039	0.244559	0.119688	0.119688	0.0736353	0.18451	0.119688	0.119688	0.18451	0.0497133	0.443675	0.225051	0.300186
PI3K EVENTS IN ERBB4 SIGNALING	38	271337	21.5996	22	0.00797608	0.500346	100	81.8182	ERBB4 (4.91 %) PTEN (2.45 %) TSC2 (1.84 %) AKT1 (1.23 %) FOXO3 (1.23 %) MDM2 (1.23 %) AKT3 (0.61 %) GSK3A (0.61 %) PIK3CA (0.61 %)	0.0251735	0.0497133	0.0736353	0.0969551	0.0251735	0.51026	0.534607	0.705888	0.429309	0.399453	0.225051	0.0736353	0.620476	0.0736353	0.600622	0.522589	0.18451	0.141848	0.0736353	0.119688	0.443675	0.0497133	0.0736353	0.0969551	0.18451	0.205039	0.351717	0.205039	0.244559	0.119688	0.119688	0.0736353	0.18451	0.119688	0.119688	0.18451	0.0497133	0.443675	0.225051	0.300186
PIP3 SIGNALING IN CARDIAC MYOCTES	67	448643	43.5689	44	0.00427653	0.500842	100	68.1818	CDKN2A (5.52 %) ERBB4 (4.91 %) PAK3 (3.07 %) PAK7 (2.45 %) PTEN (2.45 %) MET (1.84 %) IRS1 (1.84 %) PAK4 (1.84 %) TSC2 (1.84 %) PAK6 (1.23 %) MYC (1.23 %) GSK3B (1.23 %) PTK2 (1.23 %) AKT1 (1.23 %) PIK3CD (1.23 %) FOXO3 (1.23 %) TSC1 (1.23 %) PIK3CA (0.61 %) RPS6KA1 (0.61 %) AKT3 (0.61 %) GSK3A (0.61 %) SHC1 (0.61 %)	0.0604206	0.117191	0.17053	0.220647	0.0604206	0.825362	0.845828	0.949788	0.746174	0.712479	0.46379	0.17053	0.906358	0.17053	0.893927	0.835914	0.39261	0.31198	0.17053	0.267736	0.76151	0.117191	0.17053	0.220647	0.39261	0.429309	0.653367	0.429309	0.496188	0.267736	0.267736	0.17053	0.39261	0.267736	0.267736	0.39261	0.117191	0.76151	0.46379	0.582103
CELL ADHESION MOLECULES CAMS	134	1035095	2.78547	3	0.032223	0.530885	100	100	CDH4 (1.8 %)	0.00282885	0.0056497	0.00846257	0.0112675	0.00282885	0.0762558	0.0814747	0.127138	0.0604206	0.0550821	0.0279311	0.00846257	0.102057	0.00846257	0.0969551	0.078869	0.022408	0.0168535	0.00846257	0.0140645	0.0630785	0.0056497	0.00846257	0.0112675	0.022408	0.0251735	0.0470174	0.0251735	0.030681	0.0140645	0.0140645	0.00846257	0.022408	0.0140645	0.0140645	0.022408	0.0056497	0.0630785	0.0279311	0.0388839
PROXIMAL TUBULE BICARBONATE RECLAMATION	23	105687	2.78547	3	0.032223	0.530885	100	100	SLC38A3 (1.8 %)	0.00282885	0.0056497	0.00846257	0.0112675	0.00282885	0.0762558	0.0814747	0.127138	0.0604206	0.0550821	0.0279311	0.00846257	0.102057	0.00846257	0.0969551	0.078869	0.022408	0.0168535	0.00846257	0.0140645	0.0630785	0.0056497	0.00846257	0.0112675	0.022408	0.0251735	0.0470174	0.0251735	0.030681	0.0140645	0.0140645	0.00846257	0.022408	0.0140645	0.0140645	0.022408	0.0056497	0.0630785	0.0279311	0.0388839
AUTOIMMUNE THYROID DISEASE	53	432619	2.78547	3	0.032223	0.530885	100	100	TSHR (1.8 %)	0.00282885	0.0056497	0.00846257	0.0112675	0.00282885	0.0762558	0.0814747	0.127138	0.0604206	0.0550821	0.0279311	0.00846257	0.102057	0.00846257	0.0969551	0.078869	0.022408	0.0168535	0.00846257	0.0140645	0.0630785	0.0056497	0.00846257	0.0112675	0.022408	0.0251735	0.0470174	0.0251735	0.030681	0.0140645	0.0140645	0.00846257	0.022408	0.0140645	0.0140645	0.022408	0.0056497	0.0630785	0.0279311	0.0388839
AKAP95 PATHWAY	12	56820	2.78547	3	0.032223	0.530885	100	100	PRKACB (1.8 %)	0.00282885	0.0056497	0.00846257	0.0112675	0.00282885	0.0762558	0.0814747	0.127138	0.0604206	0.0550821	0.0279311	0.00846257	0.102057	0.00846257	0.0969551	0.078869	0.022408	0.0168535	0.00846257	0.0140645	0.0630785	0.0056497	0.00846257	0.0112675	0.022408	0.0251735	0.0470174	0.0251735	0.030681	0.0140645	0.0140645	0.00846257	0.022408	0.0140645	0.0140645	0.022408	0.0056497	0.0630785	0.0279311	0.0388839
VDR PATHWAY	12	113368	2.78547	3	0.032223	0.530885	100	100	TSC2 (1.8 %)	0.00282885	0.0056497	0.00846257	0.0112675	0.00282885	0.0762558	0.0814747	0.127138	0.0604206	0.0550821	0.0279311	0.00846257	0.102057	0.00846257	0.0969551	0.078869	0.022408	0.0168535	0.00846257	0.0140645	0.0630785	0.0056497	0.00846257	0.0112675	0.022408	0.0251735	0.0470174	0.0251735	0.030681	0.0140645	0.0140645	0.00846257	0.022408	0.0140645	0.0140645	0.022408	0.0056497	0.0630785	0.0279311	0.0388839
AKAP13 PATHWAY	12	68625	2.78547	3	0.032223	0.530885	100	100	PRKACB (1.8 %)	0.00282885	0.0056497	0.00846257	0.0112675	0.00282885	0.0762558	0.0814747	0.127138	0.0604206	0.0550821	0.0279311	0.00846257	0.102057	0.00846257	0.0969551	0.078869	0.022408	0.0168535	0.00846257	0.0140645	0.0630785	0.0056497	0.00846257	0.0112675	0.022408	0.0251735	0.0470174	0.0251735	0.030681	0.0140645	0.0140645	0.00846257	0.022408	0.0140645	0.0140645	0.022408	0.0056497	0.0630785	0.0279311	0.0388839
INSULIN RECEPTOR RECYCLING	23	108639	2.78547	3	0.032223	0.530885	100	100	INSR (1.8 %)	0.00282885	0.0056497	0.00846257	0.0112675	0.00282885	0.0762558	0.0814747	0.127138	0.0604206	0.0550821	0.0279311	0.00846257	0.102057	0.00846257	0.0969551	0.078869	0.022408	0.0168535	0.00846257	0.0140645	0.0630785	0.0056497	0.00846257	0.0112675	0.022408	0.0251735	0.0470174	0.0251735	0.030681	0.0140645	0.0140645	0.00846257	0.022408	0.0140645	0.0140645	0.022408	0.0056497	0.0630785	0.0279311	0.0388839
ACTIVATED POINT MUTANTS OF FGFR2	16	59235	2.78547	3	0.032223	0.530885	100	100	FGFR2 (1.8 %)	0.00282885	0.0056497	0.00846257	0.0112675	0.00282885	0.0762558	0.0814747	0.127138	0.0604206	0.0550821	0.0279311	0.00846257	0.102057	0.00846257	0.0969551	0.078869	0.022408	0.0168535	0.00846257	0.0140645	0.0630785	0.0056497	0.00846257	0.0112675	0.022408	0.0251735	0.0470174	0.0251735	0.030681	0.0140645	0.0140645	0.00846257	0.022408	0.0140645	0.0140645	0.022408	0.0056497	0.0630785	0.0279311	0.0388839
SIGNALING BY ACTIVATED POINT MUTANTS OF FGFR1	11	49123	2.78547	3	0.032223	0.530885	100	100	FGFR1 (1.8 %)	0.00282885	0.0056497	0.00846257	0.0112675	0.00282885	0.0762558	0.0814747	0.127138	0.0604206	0.0550821	0.0279311	0.00846257	0.102057	0.00846257	0.0969551	0.078869	0.022408	0.0168535	0.00846257	0.0140645	0.0630785	0.0056497	0.00846257	0.0112675	0.022408	0.0251735	0.0470174	0.0251735	0.030681	0.0140645	0.0140645	0.00846257	0.022408	0.0140645	0.0140645	0.022408	0.0056497	0.0630785	0.0279311	0.0388839
PLATELET ADHESION TO EXPOSED COLLAGEN	12	68324	2.78547	3	0.032223	0.530885	100	100	FYN (1.8 %)	0.00282885	0.0056497	0.00846257	0.0112675	0.00282885	0.0762558	0.0814747	0.127138	0.0604206	0.0550821	0.0279311	0.00846257	0.102057	0.00846257	0.0969551	0.078869	0.022408	0.0168535	0.00846257	0.0140645	0.0630785	0.0056497	0.00846257	0.0112675	0.022408	0.0251735	0.0470174	0.0251735	0.030681	0.0140645	0.0140645	0.00846257	0.022408	0.0140645	0.0140645	0.022408	0.0056497	0.0630785	0.0279311	0.0388839
AMINO ACID TRANSPORT ACROSS THE PLASMA MEMBRANE	31	184905	2.78547	3	0.032223	0.530885	100	100	SLC38A3 (1.8 %)	0.00282885	0.0056497	0.00846257	0.0112675	0.00282885	0.0762558	0.0814747	0.127138	0.0604206	0.0550821	0.0279311	0.00846257	0.102057	0.00846257	0.0969551	0.078869	0.022408	0.0168535	0.00846257	0.0140645	0.0630785	0.0056497	0.00846257	0.0112675	0.022408	0.0251735	0.0470174	0.0251735	0.030681	0.0140645	0.0140645	0.00846257	0.022408	0.0140645	0.0140645	0.022408	0.0056497	0.0630785	0.0279311	0.0388839
HORMONE LIGAND BINDING RECEPTORS	10	23725	2.78547	3	0.032223	0.530885	100	100	TSHR (1.8 %)	0.00282885	0.0056497	0.00846257	0.0112675	0.00282885	0.0762558	0.0814747	0.127138	0.0604206	0.0550821	0.0279311	0.00846257	0.102057	0.00846257	0.0969551	0.078869	0.022408	0.0168535	0.00846257	0.0140645	0.0630785	0.0056497	0.00846257	0.0112675	0.022408	0.0251735	0.0470174	0.0251735	0.030681	0.0140645	0.0140645	0.00846257	0.022408	0.0140645	0.0140645	0.022408	0.0056497	0.0630785	0.0279311	0.0388839
TRANSPORT OF INORGANIC CATIONS ANIONS AND AMINO ACIDS OLIGOPEPTIDES	94	598046	2.78547	3	0.032223	0.530885	100	100	SLC38A3 (1.8 %)	0.00282885	0.0056497	0.00846257	0.0112675	0.00282885	0.0762558	0.0814747	0.127138	0.0604206	0.0550821	0.0279311	0.00846257	0.102057	0.00846257	0.0969551	0.078869	0.022408	0.0168535	0.00846257	0.0140645	0.0630785	0.0056497	0.00846257	0.0112675	0.022408	0.0251735	0.0470174	0.0251735	0.030681	0.0140645	0.0140645	0.00846257	0.022408	0.0140645	0.0140645	0.022408	0.0056497	0.0630785	0.0279311	0.0388839
AMINO ACID AND OLIGOPEPTIDE SLC TRANSPORTERS	49	279525	2.78547	3	0.032223	0.530885	100	100	SLC38A3 (1.8 %)	0.00282885	0.0056497	0.00846257	0.0112675	0.00282885	0.0762558	0.0814747	0.127138	0.0604206	0.0550821	0.0279311	0.00846257	0.102057	0.00846257	0.0969551	0.078869	0.022408	0.0168535	0.00846257	0.0140645	0.0630785	0.0056497	0.00846257	0.0112675	0.022408	0.0251735	0.0470174	0.0251735	0.030681	0.0140645	0.0140645	0.00846257	0.022408	0.0140645	0.0140645	0.022408	0.0056497	0.0630785	0.0279311	0.0388839
IRAK2 MEDIATED ACTIVATION OF TAK1 COMPLEX UPON TLR7 8 OR 9 STIMULATION	9	45712	2.78547	3	0.032223	0.530885	100	100	IRAK2 (1.8 %)	0.00282885	0.0056497	0.00846257	0.0112675	0.00282885	0.0762558	0.0814747	0.127138	0.0604206	0.0550821	0.0279311	0.00846257	0.102057	0.00846257	0.0969551	0.078869	0.022408	0.0168535	0.00846257	0.0140645	0.0630785	0.0056497	0.00846257	0.0112675	0.022408	0.0251735	0.0470174	0.0251735	0.030681	0.0140645	0.0140645	0.00846257	0.022408	0.0140645	0.0140645	0.022408	0.0056497	0.0630785	0.0279311	0.0388839
FGFR2C LIGAND BINDING AND ACTIVATION	12	45897	2.78547	3	0.032223	0.530885	100	100	FGFR2 (1.8 %)	0.00282885	0.0056497	0.00846257	0.0112675	0.00282885	0.0762558	0.0814747	0.127138	0.0604206	0.0550821	0.0279311	0.00846257	0.102057	0.00846257	0.0969551	0.078869	0.022408	0.0168535	0.00846257	0.0140645	0.0630785	0.0056497	0.00846257	0.0112675	0.022408	0.0251735	0.0470174	0.0251735	0.030681	0.0140645	0.0140645	0.00846257	0.022408	0.0140645	0.0140645	0.022408	0.0056497	0.0630785	0.0279311	0.0388839
FGFR1 LIGAND BINDING AND ACTIVATION	14	55804	2.78547	3	0.032223	0.530885	100	100	FGFR1 (1.8 %)	0.00282885	0.0056497	0.00846257	0.0112675	0.00282885	0.0762558	0.0814747	0.127138	0.0604206	0.0550821	0.0279311	0.00846257	0.102057	0.00846257	0.0969551	0.078869	0.022408	0.0168535	0.00846257	0.0140645	0.0630785	0.0056497	0.00846257	0.0112675	0.022408	0.0251735	0.0470174	0.0251735	0.030681	0.0140645	0.0140645	0.00846257	0.022408	0.0140645	0.0140645	0.022408	0.0056497	0.0630785	0.0279311	0.0388839
GCR PATHWAY	22	128815	12.8801	13	0.00402548	0.53196	100	76.9231	GNAS (4.29 %) PIK3CG (3.07 %) AKT1 (1.23 %) RELA (0.61 %) PIK3CA (0.61 %)	0.0140645	0.0279311	0.0416027	0.0550821	0.0140645	0.327397	0.346184	0.493326	0.267736	0.246696	0.132069	0.0416027	0.416227	0.0416027	0.399453	0.336857	0.10713	0.0814747	0.0416027	0.0683719	0.278035	0.0279311	0.0416027	0.0550821	0.10713	0.119688	0.213996	0.119688	0.144276	0.0683719	0.0683719	0.0416027	0.10713	0.0683719	0.0683719	0.10713	0.0279311	0.278035	0.132069	0.179876
CYCLIN E ASSOCIATED EVENTS DURING G1 S TRANSITION	65	299525	12.8801	13	0.00402548	0.53196	100	100	RB1 (4.29 %) MYC (1.23 %) CDC25A (1.23 %) CDK7 (0.61 %) CCNE1 (0.61 %)	0.0140645	0.0279311	0.0416027	0.0550821	0.0140645	0.327397	0.346184	0.493326	0.267736	0.246696	0.132069	0.0416027	0.416227	0.0416027	0.399453	0.336857	0.10713	0.0814747	0.0416027	0.0683719	0.278035	0.0279311	0.0416027	0.0550821	0.10713	0.119688	0.213996	0.119688	0.144276	0.0683719	0.0683719	0.0416027	0.10713	0.0683719	0.0683719	0.10713	0.0279311	0.278035	0.132069	0.179876
S PHASE	109	504891	12.8801	13	0.00402548	0.53196	100	100	RB1 (4.29 %) MYC (1.23 %) CDC25A (1.23 %) CDK7 (0.61 %) CCNE1 (0.61 %)	0.0140645	0.0279311	0.0416027	0.0550821	0.0140645	0.327397	0.346184	0.493326	0.267736	0.246696	0.132069	0.0416027	0.416227	0.0416027	0.399453	0.336857	0.10713	0.0814747	0.0416027	0.0683719	0.278035	0.0279311	0.0416027	0.0550821	0.10713	0.119688	0.213996	0.119688	0.144276	0.0683719	0.0683719	0.0416027	0.10713	0.0683719	0.0683719	0.10713	0.0279311	0.278035	0.132069	0.179876
EPHA4 PATHWAY	10	82033	8.02798	8	-0.00151648	0.558978	100	87.5	EPHB1 (2.45 %) FYN (1.84 %) EPHA4 (0.61 %)	0.00846257	0.0168535	0.0251735	0.033423	0.00846257	0.211766	0.225051	0.334976	0.17053	0.156311	0.0814747	0.0251735	0.275987	0.0251735	0.263576	0.218437	0.0657289	0.0497133	0.0251735	0.0416027	0.17755	0.0168535	0.0251735	0.033423	0.0657289	0.0736353	0.134524	0.0736353	0.0892478	0.0416027	0.0416027	0.0251735	0.0657289	0.0416027	0.0416027	0.0657289	0.0168535	0.17755	0.0814747	0.112175
PTC1 PATHWAY	11	62314	8.02798	8	-0.00151648	0.558978	100	100	PTCH1 (3.07 %) CDC25A (1.23 %) CDK7 (0.61 %)	0.00846257	0.0168535	0.0251735	0.033423	0.00846257	0.211766	0.225051	0.334976	0.17053	0.156311	0.0814747	0.0251735	0.275987	0.0251735	0.263576	0.218437	0.0657289	0.0497133	0.0251735	0.0416027	0.17755	0.0168535	0.0251735	0.033423	0.0657289	0.0736353	0.134524	0.0736353	0.0892478	0.0416027	0.0416027	0.0251735	0.0657289	0.0416027	0.0416027	0.0657289	0.0168535	0.17755	0.0814747	0.112175
RESPONSE TO ELEVATED PLATELET CYTOSOLIC CA2	89	430347	8.02798	8	-0.00151648	0.558978	100	100	PRKCG (2.5 %) PRKCB (1.2 %) VEGFC (1.2 %)	0.00846257	0.0168535	0.0251735	0.033423	0.00846257	0.211766	0.225051	0.334976	0.17053	0.156311	0.0814747	0.0251735	0.275987	0.0251735	0.263576	0.218437	0.0657289	0.0497133	0.0251735	0.0416027	0.17755	0.0168535	0.0251735	0.033423	0.0657289	0.0736353	0.134524	0.0736353	0.0892478	0.0416027	0.0416027	0.0251735	0.0657289	0.0416027	0.0416027	0.0657289	0.0168535	0.17755	0.0814747	0.112175
TRAFFICKING OF AMPA RECEPTORS	28	217131	8.02798	8	-0.00151648	0.558978	100	100	PRKCG (2.5 %) MDM2 (1.2 %) PRKCB (1.2 %)	0.00846257	0.0168535	0.0251735	0.033423	0.00846257	0.211766	0.225051	0.334976	0.17053	0.156311	0.0814747	0.0251735	0.275987	0.0251735	0.263576	0.218437	0.0657289	0.0497133	0.0251735	0.0416027	0.17755	0.0168535	0.0251735	0.033423	0.0657289	0.0736353	0.134524	0.0736353	0.0892478	0.0416027	0.0416027	0.0251735	0.0657289	0.0416027	0.0416027	0.0657289	0.0168535	0.17755	0.0814747	0.112175
G BETA GAMMA SIGNALLING THROUGH PI3KGAMMA	25	132136	8.02798	8	-0.00151648	0.558978	100	100	PIK3CG (3.07 %) AKT1 (1.23 %) AKT3 (0.61 %)	0.00846257	0.0168535	0.0251735	0.033423	0.00846257	0.211766	0.225051	0.334976	0.17053	0.156311	0.0814747	0.0251735	0.275987	0.0251735	0.263576	0.218437	0.0657289	0.0497133	0.0251735	0.0416027	0.17755	0.0168535	0.0251735	0.033423	0.0657289	0.0736353	0.134524	0.0736353	0.0892478	0.0416027	0.0416027	0.0251735	0.0657289	0.0416027	0.0416027	0.0657289	0.0168535	0.17755	0.0814747	0.112175
G PROTEIN BETA GAMMA SIGNALLING	28	160205	8.02798	8	-0.00151648	0.558978	100	100	PIK3CG (3.07 %) AKT1 (1.23 %) AKT3 (0.61 %)	0.00846257	0.0168535	0.0251735	0.033423	0.00846257	0.211766	0.225051	0.334976	0.17053	0.156311	0.0814747	0.0251735	0.275987	0.0251735	0.263576	0.218437	0.0657289	0.0497133	0.0251735	0.0416027	0.17755	0.0168535	0.0251735	0.033423	0.0657289	0.0736353	0.134524	0.0736353	0.0892478	0.0416027	0.0416027	0.0251735	0.0657289	0.0416027	0.0416027	0.0657289	0.0168535	0.17755	0.0814747	0.112175
INTERFERON GAMMA SIGNALING	63	478535	8.02798	8	-0.00151648	0.558978	100	87.5	JAK2 (3.07 %) JAK1 (1.23 %) PRKCD (0.61 %)	0.00846257	0.0168535	0.0251735	0.033423	0.00846257	0.211766	0.225051	0.334976	0.17053	0.156311	0.0814747	0.0251735	0.275987	0.0251735	0.263576	0.218437	0.0657289	0.0497133	0.0251735	0.0416027	0.17755	0.0168535	0.0251735	0.033423	0.0657289	0.0736353	0.134524	0.0736353	0.0892478	0.0416027	0.0416027	0.0251735	0.0657289	0.0416027	0.0416027	0.0657289	0.0168535	0.17755	0.0814747	0.112175
DNA REPLICATION	192	945739	8.02798	8	-0.00151648	0.558978	100	87.5	RB1 (4.29 %) BUB1 (0.61 %) AURKB (0.61 %)	0.00846257	0.0168535	0.0251735	0.033423	0.00846257	0.211766	0.225051	0.334976	0.17053	0.156311	0.0814747	0.0251735	0.275987	0.0251735	0.263576	0.218437	0.0657289	0.0497133	0.0251735	0.0416027	0.17755	0.0168535	0.0251735	0.033423	0.0657289	0.0736353	0.134524	0.0736353	0.0892478	0.0416027	0.0416027	0.0251735	0.0657289	0.0416027	0.0416027	0.0657289	0.0168535	0.17755	0.0814747	0.112175
SECRETED FACTORS	344	1182073	8.02798	8	-0.00151648	0.558978	100	100	INHBA (3.07 %) VEGFC (1.23 %) MST1 (0.61 %)	0.00846257	0.0168535	0.0251735	0.033423	0.00846257	0.211766	0.225051	0.334976	0.17053	0.156311	0.0814747	0.0251735	0.275987	0.0251735	0.263576	0.218437	0.0657289	0.0497133	0.0251735	0.0416027	0.17755	0.0168535	0.0251735	0.033423	0.0657289	0.0736353	0.134524	0.0736353	0.0892478	0.0416027	0.0416027	0.0251735	0.0657289	0.0416027	0.0416027	0.0657289	0.0168535	0.17755	0.0814747	0.112175
TRANSMEMBRANE TRANSPORT OF SMALL MOLECULES	413	2507857	15.1752	15	-0.00504357	0.564333	100	93.3333	GNAS (4.29 %) SLC38A3 (1.84 %) PRKACB (1.84 %) GCK (0.61 %) PRKACA (0.61 %) PRKAR1A (0.61 %)	0.0168535	0.033423	0.0497133	0.0657289	0.0168535	0.378687	0.399453	0.557743	0.31198	0.288189	0.156311	0.0497133	0.475805	0.0497133	0.457679	0.389159	0.127138	0.0969551	0.0497133	0.0814747	0.323576	0.033423	0.0497133	0.0657289	0.127138	0.141848	0.250952	0.141848	0.17053	0.0814747	0.0814747	0.0497133	0.127138	0.0814747	0.0814747	0.127138	0.033423	0.323576	0.156311	0.211766
G ALPHA Z SIGNALLING EVENTS	44	284908	17.3904	17	-0.00985946	0.584712	100	88.2353	GNAS (4.29 %) PRKCG (2.45 %) PRKCE (1.84 %) PRKCB (1.23 %) PRKCD (0.61 %) PRKCH (0.61 %) PRKCQ (0.61 %)	0.0196347	0.0388839	0.0577551	0.0762558	0.0196347	0.426066	0.448383	0.61397	0.353551	0.327397	0.179876	0.0577551	0.529303	0.0577551	0.51026	0.437335	0.146697	0.112175	0.0577551	0.0943933	0.366244	0.0388839	0.0577551	0.0762558	0.146697	0.163451	0.28617	0.163451	0.195979	0.0943933	0.0943933	0.0577551	0.146697	0.0943933	0.0943933	0.146697	0.0388839	0.366244	0.179876	0.242416
P73PATHWAY	79	429013	37.6251	37	-0.00727573	0.587764	100	81.0811	RB1 (4.29 %) NTRK1 (4.29 %) TP63 (2.45 %) JAG2 (1.84 %) PRKACB (1.84 %) GATA1 (1.23 %) MDM2 (1.23 %) BRCA2 (1.23 %) MYC (1.23 %) ABL1 (1.23 %) JAK1 (1.23 %) FOXO3 (1.23 %) WT1 (0.61 %) BAX (0.61 %) TP73 (0.61 %) RELA (0.61 %) CHEK1 (0.61 %) BUB1 (0.61 %)	0.0497133	0.0969551	0.141848	0.18451	0.0497133	0.760155	0.783409	0.913498	0.674311	0.639344	0.399453	0.141848	0.855962	0.141848	0.840497	0.772078	0.334976	0.263576	0.141848	0.225051	0.690502	0.0969551	0.141848	0.18451	0.334976	0.368036	0.579729	0.368036	0.429309	0.225051	0.225051	0.141848	0.334976	0.225051	0.225051	0.334976	0.0969551	0.690502	0.399453	0.51026
CHEMOTAXIS	45	350736	25.5423	25	-0.00931996	0.589396	100	80	PAK3 (3.07 %) PIK3CG (3.07 %) PAK7 (2.45 %) PTEN (2.45 %) PAK4 (1.84 %) AKT1 (1.23 %) PAK6 (1.23 %) PIK3CD (1.23 %) AKT3 (0.61 %) ROCK1 (0.61 %) PIK3CA (0.61 %)	0.030681	0.0604206	0.0892478	0.117191	0.030681	0.582103	0.607353	0.77592	0.496188	0.46379	0.267736	0.0892478	0.69399	0.0892478	0.674311	0.594925	0.220647	0.17053	0.0892478	0.144276	0.511646	0.0604206	0.0892478	0.117191	0.220647	0.244559	0.411245	0.244559	0.290203	0.144276	0.144276	0.0892478	0.220647	0.144276	0.144276	0.220647	0.0604206	0.511646	0.267736	0.353551
SYNDECAN 2 PATHWAY	33	228980	19.5303	19	-0.0119562	0.595877	100	84.2105	NF1 (7.98 %) SRC (0.61 %) PRKCD (0.61 %) CASK (0.61 %) PRKACA (0.61 %) MAPK8 (0.61 %) HRAS (0.61 %) BAX (0.61 %)	0.022408	0.0443139	0.0657289	0.0866641	0.022408	0.469832	0.493326	0.663049	0.39261	0.364446	0.202783	0.0657289	0.577341	0.0657289	0.557743	0.481712	0.165818	0.127138	0.0657289	0.10713	0.40622	0.0443139	0.0657289	0.0866641	0.165818	0.18451	0.319732	0.18451	0.220647	0.10713	0.10713	0.0657289	0.165818	0.10713	0.10713	0.165818	0.0443139	0.40622	0.202783	0.271873
APOPTOTIC CLEAVAGE OF CELLULAR PROTEINS	40	328808	19.5303	19	-0.0119562	0.595877	100	84.2105	APC (6.75 %) CTNNB1 (1.23 %) PTK2 (1.23 %) PRKCD (0.61 %) PRKCQ (0.61 %) ROCK1 (0.61 %) BMX (0.61 %) STK24 (0.61 %)	0.022408	0.0443139	0.0657289	0.0866641	0.022408	0.469832	0.493326	0.663049	0.39261	0.364446	0.202783	0.0657289	0.577341	0.0657289	0.557743	0.481712	0.165818	0.127138	0.0657289	0.10713	0.40622	0.0443139	0.0657289	0.0866641	0.165818	0.18451	0.319732	0.18451	0.220647	0.10713	0.10713	0.0657289	0.165818	0.10713	0.10713	0.165818	0.0443139	0.40622	0.202783	0.271873
APOPTOTIC EXECUTION PHASE	54	385214	19.5303	19	-0.0119562	0.595877	100	84.2105	APC (6.75 %) CTNNB1 (1.23 %) PTK2 (1.23 %) PRKCD (0.61 %) PRKCQ (0.61 %) ROCK1 (0.61 %) BMX (0.61 %) STK24 (0.61 %)	0.022408	0.0443139	0.0657289	0.0866641	0.022408	0.469832	0.493326	0.663049	0.39261	0.364446	0.202783	0.0657289	0.577341	0.0657289	0.557743	0.481712	0.165818	0.127138	0.0657289	0.10713	0.40622	0.0443139	0.0657289	0.0866641	0.165818	0.18451	0.319732	0.18451	0.220647	0.10713	0.10713	0.0657289	0.165818	0.10713	0.10713	0.165818	0.0443139	0.40622	0.202783	0.271873
PHOSPHOLIPASE C MEDIATED CASCADE	54	341396	23.6024	23	-0.0112278	0.597203	100	86.9565	FGFR4 (4.29 %) PRKCG (2.45 %) FGFR1 (1.84 %) FGFR2 (1.84 %) PRKACB (1.84 %) PRKCE (1.84 %) PLCG1 (0.61 %) PRKACA (0.61 %) PRKAR1A (0.61 %) PRKCD (0.61 %)	0.0279311	0.0550821	0.0814747	0.10713	0.0279311	0.547606	0.572525	0.743281	0.46379	0.432533	0.246696	0.0814747	0.659209	0.0814747	0.639344	0.560242	0.202783	0.156311	0.0814747	0.132069	0.478767	0.0550821	0.0814747	0.10713	0.202783	0.225051	0.382197	0.225051	0.267736	0.132069	0.132069	0.0814747	0.202783	0.132069	0.132069	0.202783	0.0550821	0.478767	0.246696	0.327397
ADHERENS JUNCTIONS INTERACTIONS	27	197748	10.4996	10	-0.021172	0.6159	100	90	CDH11 (2.5 %) CDH4 (1.8 %) CTNNB1 (1.2 %) JUP (1.2 %)	0.0112675	0.022408	0.033423	0.0443139	0.0112675	0.271873	0.288189	0.419525	0.220647	0.202783	0.10713	0.033423	0.349878	0.033423	0.334976	0.280078	0.0866641	0.0657289	0.033423	0.0550821	0.229429	0.022408	0.033423	0.0443139	0.0866641	0.0969551	0.175217	0.0969551	0.117191	0.0550821	0.0550821	0.033423	0.0866641	0.0550821	0.0550821	0.0866641	0.022408	0.229429	0.10713	0.146697
IL 6 SIGNALING	11	65528	10.4996	10	-0.021172	0.6159	100	90	JAK2 (3.07 %) JAK1 (1.23 %) TYK2 (1.23 %) STAT3 (0.61 %)	0.0112675	0.022408	0.033423	0.0443139	0.0112675	0.271873	0.288189	0.419525	0.220647	0.202783	0.10713	0.033423	0.349878	0.033423	0.334976	0.280078	0.0866641	0.0657289	0.033423	0.0550821	0.229429	0.022408	0.033423	0.0443139	0.0866641	0.0969551	0.175217	0.0969551	0.117191	0.0550821	0.0550821	0.033423	0.0866641	0.0550821	0.0550821	0.0866641	0.022408	0.229429	0.10713	0.146697
EPONFKB PATHWAY	11	64728	5.45893	5	-0.0381372	0.645153	100	80	JAK2 (3.07 %) RELA (0.61 %)	0.0056497	0.0112675	0.0168535	0.022408	0.0056497	0.146697	0.156311	0.238111	0.117191	0.10713	0.0550821	0.0168535	0.193698	0.0168535	0.18451	0.151518	0.0443139	0.033423	0.0168535	0.0279311	0.122178	0.0112675	0.0168535	0.022408	0.0443139	0.0497133	0.0918242	0.0497133	0.0604206	0.0279311	0.0279311	0.0168535	0.0443139	0.0279311	0.0279311	0.0443139	0.0112675	0.122178	0.0550821	0.0762558
CLASS A1 RHODOPSIN LIKE RECEPTORS	305	832400	5.45893	5	-0.0381372	0.645153	100	100	TSHR (1.8 %) CYSLTR2 (1.2 %)	0.0056497	0.0112675	0.0168535	0.022408	0.0056497	0.146697	0.156311	0.238111	0.117191	0.10713	0.0550821	0.0168535	0.193698	0.0168535	0.18451	0.151518	0.0443139	0.033423	0.0168535	0.0279311	0.122178	0.0112675	0.0168535	0.022408	0.0443139	0.0497133	0.0918242	0.0497133	0.0604206	0.0279311	0.0279311	0.0168535	0.0443139	0.0279311	0.0279311	0.0443139	0.0112675	0.122178	0.0550821	0.0762558
SEMA3A PAK DEPENDENT AXON REPULSION	15	105652	5.45893	5	-0.0381372	0.645153	100	100	FYN (1.8 %) FES (1.2 %)	0.0056497	0.0112675	0.0168535	0.022408	0.0056497	0.146697	0.156311	0.238111	0.117191	0.10713	0.0550821	0.0168535	0.193698	0.0168535	0.18451	0.151518	0.0443139	0.033423	0.0168535	0.0279311	0.122178	0.0112675	0.0168535	0.022408	0.0443139	0.0497133	0.0918242	0.0497133	0.0604206	0.0279311	0.0279311	0.0168535	0.0443139	0.0279311	0.0279311	0.0443139	0.0112675	0.122178	0.0550821	0.0762558
SEMA3A PLEXIN REPULSION SIGNALING BY INHIBITING INTEGRIN ADHESION	13	107532	5.45893	5	-0.0381372	0.645153	100	100	FYN (1.8 %) FES (1.2 %)	0.0056497	0.0112675	0.0168535	0.022408	0.0056497	0.146697	0.156311	0.238111	0.117191	0.10713	0.0550821	0.0168535	0.193698	0.0168535	0.18451	0.151518	0.0443139	0.033423	0.0168535	0.0279311	0.122178	0.0112675	0.0168535	0.022408	0.0443139	0.0497133	0.0918242	0.0497133	0.0604206	0.0279311	0.0279311	0.0168535	0.0443139	0.0279311	0.0279311	0.0443139	0.0112675	0.122178	0.0550821	0.0762558
DILATED CARDIOMYOPATHY	92	764049	12.8801	12	-0.0307366	0.652213	100	91.6667	GNAS (4.29 %) PRKACB (1.84 %) CACNA2D2 (0.61 %) PRKX (0.61 %) PRKACA (0.61 %)	0.0140645	0.0279311	0.0416027	0.0550821	0.0140645	0.327397	0.346184	0.493326	0.267736	0.246696	0.132069	0.0416027	0.416227	0.0416027	0.399453	0.336857	0.10713	0.0814747	0.0416027	0.0683719	0.278035	0.0279311	0.0416027	0.0550821	0.10713	0.119688	0.213996	0.119688	0.144276	0.0683719	0.0683719	0.0416027	0.10713	0.0683719	0.0683719	0.10713	0.0279311	0.278035	0.132069	0.179876
CSK PATHWAY	24	146537	12.8801	12	-0.0307366	0.652213	100	91.6667	GNAS (4.29 %) PRKACB (1.84 %) ZAP70 (0.61 %) PRKAR1A (0.61 %) LCK (0.61 %)	0.0140645	0.0279311	0.0416027	0.0550821	0.0140645	0.327397	0.346184	0.493326	0.267736	0.246696	0.132069	0.0416027	0.416227	0.0416027	0.399453	0.336857	0.10713	0.0814747	0.0416027	0.0683719	0.278035	0.0279311	0.0416027	0.0550821	0.10713	0.119688	0.213996	0.119688	0.144276	0.0683719	0.0683719	0.0416027	0.10713	0.0683719	0.0683719	0.10713	0.0279311	0.278035	0.132069	0.179876
BARRESTIN SRC PATHWAY	15	109323	12.8801	12	-0.0307366	0.652213	100	83.3333	GNAS (4.29 %) HCK (1.84 %) SRC (0.61 %) HRAS (0.61 %) RAF1 (0.61 %)	0.0140645	0.0279311	0.0416027	0.0550821	0.0140645	0.327397	0.346184	0.493326	0.267736	0.246696	0.132069	0.0416027	0.416227	0.0416027	0.399453	0.336857	0.10713	0.0814747	0.0416027	0.0683719	0.278035	0.0279311	0.0416027	0.0550821	0.10713	0.119688	0.213996	0.119688	0.144276	0.0683719	0.0683719	0.0416027	0.10713	0.0683719	0.0683719	0.10713	0.0279311	0.278035	0.132069	0.179876
SHH PATHWAY	16	105678	12.8801	12	-0.0307366	0.652213	100	100	PTCH1 (3.07 %) PRKACB (1.84 %) GSK3B (1.23 %) SMO (0.61 %) PRKAR1A (0.61 %)	0.0140645	0.0279311	0.0416027	0.0550821	0.0140645	0.327397	0.346184	0.493326	0.267736	0.246696	0.132069	0.0416027	0.416227	0.0416027	0.399453	0.336857	0.10713	0.0814747	0.0416027	0.0683719	0.278035	0.0279311	0.0416027	0.0550821	0.10713	0.119688	0.213996	0.119688	0.144276	0.0683719	0.0683719	0.0416027	0.10713	0.0683719	0.0683719	0.10713	0.0279311	0.278035	0.132069	0.179876
STAT3 PATHWAY	11	61050	12.8801	12	-0.0307366	0.652213	100	91.6667	JAK2 (3.07 %) JAK3 (1.84 %) JAK1 (1.23 %) SRC (0.61 %) STAT3 (0.61 %)	0.0140645	0.0279311	0.0416027	0.0550821	0.0140645	0.327397	0.346184	0.493326	0.267736	0.246696	0.132069	0.0416027	0.416227	0.0416027	0.399453	0.336857	0.10713	0.0814747	0.0416027	0.0683719	0.278035	0.0279311	0.0416027	0.0550821	0.10713	0.119688	0.213996	0.119688	0.144276	0.0683719	0.0683719	0.0416027	0.10713	0.0683719	0.0683719	0.10713	0.0279311	0.278035	0.132069	0.179876
CDC42 PATHWAY	70	526173	34.413	33	-0.0182082	0.65435	100	75.7576	APC (6.75 %) CDC42BPA (3.07 %) PRKCE (1.84 %) PAK4 (1.84 %) BRAF (1.84 %) VAV2 (1.23 %) GSK3B (1.23 %) YES1 (1.23 %) CTNNB1 (1.23 %) MAPK8 (0.61 %) TNK2 (0.61 %) PIK3CA (0.61 %) SRC (0.61 %) MAP2K6 (0.61 %) RAF1 (0.61 %) HRAS (0.61 %)	0.0443139	0.0866641	0.127138	0.165818	0.0443139	0.718922	0.743281	0.886464	0.631077	0.596071	0.364446	0.127138	0.821359	0.127138	0.804409	0.731377	0.30414	0.238111	0.127138	0.202783	0.647425	0.0866641	0.127138	0.165818	0.30414	0.334976	0.537236	0.334976	0.39261	0.202783	0.202783	0.127138	0.30414	0.202783	0.202783	0.30414	0.0866641	0.647425	0.364446	0.469832
CCR3 PATHWAY	23	168902	15.1752	14	-0.0350068	0.67502	100	85.7143	GNAS (4.29 %) PIK3C2G (2.45 %) PTK2 (1.23 %) PRKCB (1.23 %) HRAS (0.61 %) RAF1 (0.61 %)	0.0168535	0.033423	0.0497133	0.0657289	0.0168535	0.378687	0.399453	0.557743	0.31198	0.288189	0.156311	0.0497133	0.475805	0.0497133	0.457679	0.389159	0.127138	0.0969551	0.0497133	0.0814747	0.323576	0.033423	0.0497133	0.0657289	0.127138	0.141848	0.250952	0.141848	0.17053	0.0814747	0.0814747	0.0497133	0.127138	0.0814747	0.0814747	0.127138	0.033423	0.323576	0.156311	0.211766
S1P S1P3 PATHWAY	29	204221	15.1752	14	-0.0350068	0.67502	100	92.8571	JAK2 (3.07 %) FLT1 (2.45 %) PDGFRB (1.84 %) AKT1 (1.23 %) SRC (0.61 %) AKT3 (0.61 %)	0.0168535	0.033423	0.0497133	0.0657289	0.0168535	0.378687	0.399453	0.557743	0.31198	0.288189	0.156311	0.0497133	0.475805	0.0497133	0.457679	0.389159	0.127138	0.0969551	0.0497133	0.0814747	0.323576	0.033423	0.0497133	0.0657289	0.127138	0.141848	0.250952	0.141848	0.17053	0.0814747	0.0814747	0.0497133	0.127138	0.0814747	0.0814747	0.127138	0.033423	0.323576	0.156311	0.211766
ERBB4 PATHWAY	38	293480	25.5423	24	-0.0270487	0.679095	100	79.1667	ERBB4 (4.91 %) JAK2 (3.07 %) FYN (1.84 %) ERBB2 (1.84 %) MDM2 (1.23 %) PIK3R2 (1.23 %) STAT5B (1.23 %) PIK3CD (1.23 %) STAT5A (0.61 %) PIK3CA (0.61 %) SHC1 (0.61 %)	0.030681	0.0604206	0.0892478	0.117191	0.030681	0.582103	0.607353	0.77592	0.496188	0.46379	0.267736	0.0892478	0.69399	0.0892478	0.674311	0.594925	0.220647	0.17053	0.0892478	0.144276	0.511646	0.0604206	0.0892478	0.117191	0.220647	0.244559	0.411245	0.244559	0.290203	0.144276	0.144276	0.0892478	0.220647	0.144276	0.144276	0.220647	0.0604206	0.511646	0.267736	0.353551
PI 3K CASCADE	56	343142	25.5423	24	-0.0270487	0.679095	100	87.5	FGFR4 (4.29 %) PTEN (2.45 %) FGFR1 (1.84 %) FGFR2 (1.84 %) TSC2 (1.84 %) AKT1 (1.23 %) FOXO3 (1.23 %) MDM2 (1.23 %) AKT3 (0.61 %) GSK3A (0.61 %) PIK3CA (0.61 %)	0.030681	0.0604206	0.0892478	0.117191	0.030681	0.582103	0.607353	0.77592	0.496188	0.46379	0.267736	0.0892478	0.69399	0.0892478	0.674311	0.594925	0.220647	0.17053	0.0892478	0.144276	0.511646	0.0604206	0.0892478	0.117191	0.220647	0.244559	0.411245	0.244559	0.290203	0.144276	0.144276	0.0892478	0.220647	0.144276	0.144276	0.220647	0.0604206	0.511646	0.267736	0.353551
EDG1 PATHWAY	27	192779	17.3904	16	-0.0361884	0.68821	100	87.5	PDGFRA (3.68 %) PIK3CG (3.07 %) PRKCB (1.23 %) PTK2 (1.23 %) AKT1 (1.23 %) SRC (0.61 %) PIK3CA (0.61 %)	0.0196347	0.0388839	0.0577551	0.0762558	0.0196347	0.426066	0.448383	0.61397	0.353551	0.327397	0.179876	0.0577551	0.529303	0.0577551	0.51026	0.437335	0.146697	0.112175	0.0577551	0.0943933	0.366244	0.0388839	0.0577551	0.0762558	0.146697	0.163451	0.28617	0.163451	0.195979	0.0943933	0.0943933	0.0577551	0.146697	0.0943933	0.0943933	0.146697	0.0388839	0.366244	0.179876	0.242416
DIFFERENTIATION PATHWAY IN PC12 CELLS	45	288083	23.6024	22	-0.0305329	0.6888	100	86.3636	NTRK1 (4.29 %) PIK3C2G (2.45 %) PTPN11 (1.84 %) BRAF (1.84 %) AKT1 (1.23 %) PIK3CD (1.23 %) SHC1 (0.61 %) PIK3CA (0.61 %) SRC (0.61 %) MAPK8 (0.61 %)	0.0279311	0.0550821	0.0814747	0.10713	0.0279311	0.547606	0.572525	0.743281	0.46379	0.432533	0.246696	0.0814747	0.659209	0.0814747	0.639344	0.560242	0.202783	0.156311	0.0814747	0.132069	0.478767	0.0550821	0.0814747	0.10713	0.202783	0.225051	0.382197	0.225051	0.267736	0.132069	0.132069	0.0814747	0.202783	0.132069	0.132069	0.202783	0.0550821	0.478767	0.246696	0.327397
PHOSPHOINOSITIDE 3 KINASE PATHWAY	37	242959	21.5996	20	-0.0334166	0.693971	100	85	CDKN2A (5.52 %) PTEN (2.45 %) AKT1 (1.23 %) GSK3B (1.23 %) AKT3 (0.61 %) GSK3A (0.61 %) SHC1 (0.61 %) PIK3CA (0.61 %) RPS6KA1 (0.61 %)	0.0251735	0.0497133	0.0736353	0.0969551	0.0251735	0.51026	0.534607	0.705888	0.429309	0.399453	0.225051	0.0736353	0.620476	0.0736353	0.600622	0.522589	0.18451	0.141848	0.0736353	0.119688	0.443675	0.0497133	0.0736353	0.0969551	0.18451	0.205039	0.351717	0.205039	0.244559	0.119688	0.119688	0.0736353	0.18451	0.119688	0.119688	0.18451	0.0497133	0.443675	0.225051	0.300186
VIBRIO CHOLERAE INFECTION	56	315366	19.5303	18	-0.0354373	0.694064	100	83.3333	GNAS (4.29 %) PRKCG (2.45 %) PRKACB (1.84 %) PRKCB (1.23 %) PLCG2 (1.23 %) PRKX (0.61 %) PRKACA (0.61 %) PLCG1 (0.61 %)	0.022408	0.0443139	0.0657289	0.0866641	0.022408	0.469832	0.493326	0.663049	0.39261	0.364446	0.202783	0.0657289	0.577341	0.0657289	0.557743	0.481712	0.165818	0.127138	0.0657289	0.10713	0.40622	0.0443139	0.0657289	0.0866641	0.165818	0.18451	0.319732	0.18451	0.220647	0.10713	0.10713	0.0657289	0.165818	0.10713	0.10713	0.165818	0.0443139	0.40622	0.202783	0.271873
PROLACTIN RECEPTOR SIGNALING	14	76249	8.02798	7	-0.0595084	0.704287	100	85.7143	JAK2 (3.07 %) STAT5B (1.23 %) STAT5A (0.61 %)	0.00846257	0.0168535	0.0251735	0.033423	0.00846257	0.211766	0.225051	0.334976	0.17053	0.156311	0.0814747	0.0251735	0.275987	0.0251735	0.263576	0.218437	0.0657289	0.0497133	0.0251735	0.0416027	0.17755	0.0168535	0.0251735	0.033423	0.0657289	0.0736353	0.134524	0.0736353	0.0892478	0.0416027	0.0416027	0.0251735	0.0657289	0.0416027	0.0416027	0.0657289	0.0168535	0.17755	0.0814747	0.112175
SIGNALING BY NOTCH4	12	128428	8.02798	7	-0.0595084	0.704287	100	100	JAG2 (1.84 %) NOTCH4 (1.84 %) JAG1 (0.61 %)	0.00846257	0.0168535	0.0251735	0.033423	0.00846257	0.211766	0.225051	0.334976	0.17053	0.156311	0.0814747	0.0251735	0.275987	0.0251735	0.263576	0.218437	0.0657289	0.0497133	0.0251735	0.0416027	0.17755	0.0168535	0.0251735	0.033423	0.0657289	0.0736353	0.134524	0.0736353	0.0892478	0.0416027	0.0416027	0.0251735	0.0657289	0.0416027	0.0416027	0.0657289	0.0168535	0.17755	0.0814747	0.112175
NEGATIVE REGULATION OF THE PI3K AKT NETWORK	9	64353	8.02798	7	-0.0595084	0.704287	100	100	PTEN (2.45 %) AKT1 (1.23 %) AKT3 (0.61 %)	0.00846257	0.0168535	0.0251735	0.033423	0.00846257	0.211766	0.225051	0.334976	0.17053	0.156311	0.0814747	0.0251735	0.275987	0.0251735	0.263576	0.218437	0.0657289	0.0497133	0.0251735	0.0416027	0.17755	0.0168535	0.0251735	0.033423	0.0657289	0.0736353	0.134524	0.0736353	0.0892478	0.0416027	0.0416027	0.0251735	0.0657289	0.0416027	0.0416027	0.0657289	0.0168535	0.17755	0.0814747	0.112175
CHROMOSOME MAINTENANCE	122	520301	8.02798	7	-0.0595084	0.704287	100	100	TERT (3.07 %) ATR (0.61 %) BRCA1 (0.61 %)	0.00846257	0.0168535	0.0251735	0.033423	0.00846257	0.211766	0.225051	0.334976	0.17053	0.156311	0.0814747	0.0251735	0.275987	0.0251735	0.263576	0.218437	0.0657289	0.0497133	0.0251735	0.0416027	0.17755	0.0168535	0.0251735	0.033423	0.0657289	0.0736353	0.134524	0.0736353	0.0892478	0.0416027	0.0416027	0.0251735	0.0657289	0.0416027	0.0416027	0.0657289	0.0168535	0.17755	0.0814747	0.112175
G1 S SPECIFIC TRANSCRIPTION	19	64903	8.02798	7	-0.0595084	0.704287	100	100	TFDP1 (2.45 %) CDC25A (1.23 %) CCNE1 (0.61 %)	0.00846257	0.0168535	0.0251735	0.033423	0.00846257	0.211766	0.225051	0.334976	0.17053	0.156311	0.0814747	0.0251735	0.275987	0.0251735	0.263576	0.218437	0.0657289	0.0497133	0.0251735	0.0416027	0.17755	0.0168535	0.0251735	0.033423	0.0657289	0.0736353	0.134524	0.0736353	0.0892478	0.0416027	0.0416027	0.0251735	0.0657289	0.0416027	0.0416027	0.0657289	0.0168535	0.17755	0.0814747	0.112175
CELL CYCLE MITOTIC	325	1700602	34.413	32	-0.0315721	0.730715	100	78.125	CDKN2A (5.52 %) RB1 (4.29 %) RBL1 (2.45 %) TFDP1 (2.45 %) MYBL2 (1.23 %) MYC (1.23 %) RBL2 (1.23 %) CDC25A (1.23 %) CDK7 (0.61 %) CDKN2B (0.61 %) CDKN2C (0.61 %) PRKACA (0.61 %) AURKA (0.61 %) BUB1 (0.61 %) CCNE1 (0.61 %) AURKB (0.61 %)	0.0443139	0.0866641	0.127138	0.165818	0.0443139	0.718922	0.743281	0.886464	0.631077	0.596071	0.364446	0.127138	0.821359	0.127138	0.804409	0.731377	0.30414	0.238111	0.127138	0.202783	0.647425	0.0866641	0.127138	0.165818	0.30414	0.334976	0.537236	0.334976	0.39261	0.202783	0.202783	0.127138	0.30414	0.202783	0.202783	0.30414	0.0866641	0.647425	0.364446	0.469832
IL12 PATHWAY	23	87487	10.4996	9	-0.0669295	0.739536	100	100	JAK2 (3.07 %) TYK2 (1.23 %) MAPK8 (0.61 %) MAP2K6 (0.61 %)	0.0112675	0.022408	0.033423	0.0443139	0.0112675	0.271873	0.288189	0.419525	0.220647	0.202783	0.10713	0.033423	0.349878	0.033423	0.334976	0.280078	0.0866641	0.0657289	0.033423	0.0550821	0.229429	0.022408	0.033423	0.0443139	0.0866641	0.0969551	0.175217	0.0969551	0.117191	0.0550821	0.0550821	0.033423	0.0866641	0.0550821	0.0550821	0.0866641	0.022408	0.229429	0.10713	0.146697
SYNTHESIS OF PIPS AT THE GOLGI MEMBRANE	17	110074	10.4996	9	-0.0669295	0.739536	100	77.7778	PIK3C3 (3.07 %) PIK3C2G (2.45 %) PIK3C2A (1.23 %) PI4KA (0.61 %)	0.0112675	0.022408	0.033423	0.0443139	0.0112675	0.271873	0.288189	0.419525	0.220647	0.202783	0.10713	0.033423	0.349878	0.033423	0.334976	0.280078	0.0866641	0.0657289	0.033423	0.0550821	0.229429	0.022408	0.033423	0.0443139	0.0866641	0.0969551	0.175217	0.0969551	0.117191	0.0550821	0.0550821	0.033423	0.0866641	0.0550821	0.0550821	0.0866641	0.022408	0.229429	0.10713	0.146697
VEGF PATHWAY	29	198876	25.5423	23	-0.0455321	0.760186	100	69.5652	KDR (4.91 %) PIK3CG (3.07 %) FLT1 (2.45 %) FLT4 (2.45 %) PRKCB (1.23 %) PTK2 (1.23 %) HRAS (0.61 %) SHC1 (0.61 %) VHL (0.61 %) PIK3CA (0.61 %) PLCG1 (0.61 %)	0.030681	0.0604206	0.0892478	0.117191	0.030681	0.582103	0.607353	0.77592	0.496188	0.46379	0.267736	0.0892478	0.69399	0.0892478	0.674311	0.594925	0.220647	0.17053	0.0892478	0.144276	0.511646	0.0604206	0.0892478	0.117191	0.220647	0.244559	0.411245	0.244559	0.290203	0.144276	0.144276	0.0892478	0.220647	0.144276	0.144276	0.220647	0.0604206	0.511646	0.267736	0.353551
RAC1 PATHWAY	23	181396	12.8801	11	-0.0685252	0.761177	100	81.8182	PDGFRA (3.68 %) PIK3CG (3.07 %) VAV1 (1.23 %) PIK3CA (0.61 %) CDK5 (0.61 %)	0.0140645	0.0279311	0.0416027	0.0550821	0.0140645	0.327397	0.346184	0.493326	0.267736	0.246696	0.132069	0.0416027	0.416227	0.0416027	0.399453	0.336857	0.10713	0.0814747	0.0416027	0.0683719	0.278035	0.0279311	0.0416027	0.0550821	0.10713	0.119688	0.213996	0.119688	0.144276	0.0683719	0.0683719	0.0416027	0.10713	0.0683719	0.0683719	0.10713	0.0279311	0.278035	0.132069	0.179876
IGF1MTOR PATHWAY	20	156605	12.8801	11	-0.0685252	0.761177	100	100	PTEN (2.45 %) GSK3B (1.23 %) AKT1 (1.23 %) IGF1R (1.23 %) PIK3CA (0.61 %)	0.0140645	0.0279311	0.0416027	0.0550821	0.0140645	0.327397	0.346184	0.493326	0.267736	0.246696	0.132069	0.0416027	0.416227	0.0416027	0.399453	0.336857	0.10713	0.0814747	0.0416027	0.0683719	0.278035	0.0279311	0.0416027	0.0550821	0.10713	0.119688	0.213996	0.119688	0.144276	0.0683719	0.0683719	0.0416027	0.10713	0.0683719	0.0683719	0.10713	0.0279311	0.278035	0.132069	0.179876
IL5 PATHWAY	14	82145	12.8801	11	-0.0685252	0.761177	100	90.9091	JAK2 (3.07 %) PTPN11 (1.84 %) STAT5B (1.23 %) PIK3CA (0.61 %) STAT5A (0.61 %)	0.0140645	0.0279311	0.0416027	0.0550821	0.0140645	0.327397	0.346184	0.493326	0.267736	0.246696	0.132069	0.0416027	0.416227	0.0416027	0.399453	0.336857	0.10713	0.0814747	0.0416027	0.0683719	0.278035	0.0279311	0.0416027	0.0550821	0.10713	0.119688	0.213996	0.119688	0.144276	0.0683719	0.0683719	0.0416027	0.10713	0.0683719	0.0683719	0.10713	0.0279311	0.278035	0.132069	0.179876
HEDGEHOG 2PATHWAY	22	168106	12.8801	11	-0.0685252	0.761177	100	100	PTCH1 (3.07 %) AKT1 (1.23 %) PTCH2 (1.23 %) PIK3CA (0.61 %) SMO (0.61 %)	0.0140645	0.0279311	0.0416027	0.0550821	0.0140645	0.327397	0.346184	0.493326	0.267736	0.246696	0.132069	0.0416027	0.416227	0.0416027	0.399453	0.336857	0.10713	0.0814747	0.0416027	0.0683719	0.278035	0.0279311	0.0416027	0.0550821	0.10713	0.119688	0.213996	0.119688	0.144276	0.0683719	0.0683719	0.0416027	0.10713	0.0683719	0.0683719	0.10713	0.0279311	0.278035	0.132069	0.179876
GROWTH HORMONE RECEPTOR SIGNALING	24	134759	12.8801	11	-0.0685252	0.761177	100	90.9091	JAK2 (3.07 %) IRS1 (1.84 %) STAT5B (1.23 %) STAT3 (0.61 %) STAT5A (0.61 %)	0.0140645	0.0279311	0.0416027	0.0550821	0.0140645	0.327397	0.346184	0.493326	0.267736	0.246696	0.132069	0.0416027	0.416227	0.0416027	0.399453	0.336857	0.10713	0.0814747	0.0416027	0.0683719	0.278035	0.0279311	0.0416027	0.0550821	0.10713	0.119688	0.213996	0.119688	0.144276	0.0683719	0.0683719	0.0416027	0.10713	0.0683719	0.0683719	0.10713	0.0279311	0.278035	0.132069	0.179876
CELL CELL JUNCTION ORGANIZATION	56	310582	12.8801	11	-0.0685252	0.761177	100	90.9091	CDH11 (2.45 %) CDH4 (1.84 %) CTNNB1 (1.23 %) JUP (1.23 %) PRKCI (0.61 %)	0.0140645	0.0279311	0.0416027	0.0550821	0.0140645	0.327397	0.346184	0.493326	0.267736	0.246696	0.132069	0.0416027	0.416227	0.0416027	0.399453	0.336857	0.10713	0.0814747	0.0416027	0.0683719	0.278035	0.0279311	0.0416027	0.0550821	0.10713	0.119688	0.213996	0.119688	0.144276	0.0683719	0.0683719	0.0416027	0.10713	0.0683719	0.0683719	0.10713	0.0279311	0.278035	0.132069	0.179876
CELL JUNCTION ORGANIZATION	78	455843	12.8801	11	-0.0685252	0.761177	100	90.9091	CDH11 (2.45 %) CDH4 (1.84 %) CTNNB1 (1.23 %) JUP (1.23 %) PRKCI (0.61 %)	0.0140645	0.0279311	0.0416027	0.0550821	0.0140645	0.327397	0.346184	0.493326	0.267736	0.246696	0.132069	0.0416027	0.416227	0.0416027	0.399453	0.336857	0.10713	0.0814747	0.0416027	0.0683719	0.278035	0.0279311	0.0416027	0.0550821	0.10713	0.119688	0.213996	0.119688	0.144276	0.0683719	0.0683719	0.0416027	0.10713	0.0683719	0.0683719	0.10713	0.0279311	0.278035	0.132069	0.179876
CITRATE CYCLE TCA CYCLE	32	145681	2.78547	2	-0.143868	0.772754	100	100	FH (1.2 %)	0.00282885	0.0056497	0.00846257	0.0112675	0.00282885	0.0762558	0.0814747	0.127138	0.0604206	0.0550821	0.0279311	0.00846257	0.102057	0.00846257	0.0969551	0.078869	0.022408	0.0168535	0.00846257	0.0140645	0.0630785	0.0056497	0.00846257	0.0112675	0.022408	0.0251735	0.0470174	0.0251735	0.030681	0.0140645	0.0140645	0.00846257	0.022408	0.0140645	0.0140645	0.022408	0.0056497	0.0630785	0.0279311	0.0388839
HOMOLOGOUS RECOMBINATION	28	167217	2.78547	2	-0.143868	0.772754	100	100	BRCA2 (1.2 %)	0.00282885	0.0056497	0.00846257	0.0112675	0.00282885	0.0762558	0.0814747	0.127138	0.0604206	0.0550821	0.0279311	0.00846257	0.102057	0.00846257	0.0969551	0.078869	0.022408	0.0168535	0.00846257	0.0140645	0.0630785	0.0056497	0.00846257	0.0112675	0.022408	0.0251735	0.0470174	0.0251735	0.030681	0.0140645	0.0140645	0.00846257	0.022408	0.0140645	0.0140645	0.022408	0.0056497	0.0630785	0.0279311	0.0388839
PARKINSONS DISEASE	133	414561	2.78547	2	-0.143868	0.772754	100	100	LRRK2 (1.2 %)	0.00282885	0.0056497	0.00846257	0.0112675	0.00282885	0.0762558	0.0814747	0.127138	0.0604206	0.0550821	0.0279311	0.00846257	0.102057	0.00846257	0.0969551	0.078869	0.022408	0.0168535	0.00846257	0.0140645	0.0630785	0.0056497	0.00846257	0.0112675	0.022408	0.0251735	0.0470174	0.0251735	0.030681	0.0140645	0.0140645	0.00846257	0.022408	0.0140645	0.0140645	0.022408	0.0056497	0.0630785	0.0279311	0.0388839
EIF PATHWAY	16	101143	2.78547	2	-0.143868	0.772754	100	100	EIF4G1 (1.2 %)	0.00282885	0.0056497	0.00846257	0.0112675	0.00282885	0.0762558	0.0814747	0.127138	0.0604206	0.0550821	0.0279311	0.00846257	0.102057	0.00846257	0.0969551	0.078869	0.022408	0.0168535	0.00846257	0.0140645	0.0630785	0.0056497	0.00846257	0.0112675	0.022408	0.0251735	0.0470174	0.0251735	0.030681	0.0140645	0.0140645	0.00846257	0.022408	0.0140645	0.0140645	0.022408	0.0056497	0.0630785	0.0279311	0.0388839
AHSP PATHWAY	13	36522	2.78547	2	-0.143868	0.772754	100	100	GATA1 (1.2 %)	0.00282885	0.0056497	0.00846257	0.0112675	0.00282885	0.0762558	0.0814747	0.127138	0.0604206	0.0550821	0.0279311	0.00846257	0.102057	0.00846257	0.0969551	0.078869	0.022408	0.0168535	0.00846257	0.0140645	0.0630785	0.0056497	0.00846257	0.0112675	0.022408	0.0251735	0.0470174	0.0251735	0.030681	0.0140645	0.0140645	0.00846257	0.022408	0.0140645	0.0140645	0.022408	0.0056497	0.0630785	0.0279311	0.0388839
EIF2 PATHWAY	11	70670	2.78547	2	-0.143868	0.772754	100	100	GSK3B (1.2 %)	0.00282885	0.0056497	0.00846257	0.0112675	0.00282885	0.0762558	0.0814747	0.127138	0.0604206	0.0550821	0.0279311	0.00846257	0.102057	0.00846257	0.0969551	0.078869	0.022408	0.0168535	0.00846257	0.0140645	0.0630785	0.0056497	0.00846257	0.0112675	0.022408	0.0251735	0.0470174	0.0251735	0.030681	0.0140645	0.0140645	0.00846257	0.022408	0.0140645	0.0140645	0.022408	0.0056497	0.0630785	0.0279311	0.0388839
MEF2D PATHWAY	23	131304	2.78547	2	-0.143868	0.772754	100	100	PRKCB (1.2 %)	0.00282885	0.0056497	0.00846257	0.0112675	0.00282885	0.0762558	0.0814747	0.127138	0.0604206	0.0550821	0.0279311	0.00846257	0.102057	0.00846257	0.0969551	0.078869	0.022408	0.0168535	0.00846257	0.0140645	0.0630785	0.0056497	0.00846257	0.0112675	0.022408	0.0251735	0.0470174	0.0251735	0.030681	0.0140645	0.0140645	0.00846257	0.022408	0.0140645	0.0140645	0.022408	0.0056497	0.0630785	0.0279311	0.0388839
KREB PATHWAY	8	37919	2.78547	2	-0.143868	0.772754	100	100	FH (1.2 %)	0.00282885	0.0056497	0.00846257	0.0112675	0.00282885	0.0762558	0.0814747	0.127138	0.0604206	0.0550821	0.0279311	0.00846257	0.102057	0.00846257	0.0969551	0.078869	0.022408	0.0168535	0.00846257	0.0140645	0.0630785	0.0056497	0.00846257	0.0112675	0.022408	0.0251735	0.0470174	0.0251735	0.030681	0.0140645	0.0140645	0.00846257	0.022408	0.0140645	0.0140645	0.022408	0.0056497	0.0630785	0.0279311	0.0388839
CONE PATHWAY	23	89224	2.78547	2	-0.143868	0.772754	100	100	GRK7 (1.2 %)	0.00282885	0.0056497	0.00846257	0.0112675	0.00282885	0.0762558	0.0814747	0.127138	0.0604206	0.0550821	0.0279311	0.00846257	0.102057	0.00846257	0.0969551	0.078869	0.022408	0.0168535	0.00846257	0.0140645	0.0630785	0.0056497	0.00846257	0.0112675	0.022408	0.0251735	0.0470174	0.0251735	0.030681	0.0140645	0.0140645	0.00846257	0.022408	0.0140645	0.0140645	0.022408	0.0056497	0.0630785	0.0279311	0.0388839
RANBP2 PATHWAY	11	104933	2.78547	2	-0.143868	0.772754	100	100	MDM2 (1.2 %)	0.00282885	0.0056497	0.00846257	0.0112675	0.00282885	0.0762558	0.0814747	0.127138	0.0604206	0.0550821	0.0279311	0.00846257	0.102057	0.00846257	0.0969551	0.078869	0.022408	0.0168535	0.00846257	0.0140645	0.0630785	0.0056497	0.00846257	0.0112675	0.022408	0.0251735	0.0470174	0.0251735	0.030681	0.0140645	0.0140645	0.00846257	0.022408	0.0140645	0.0140645	0.022408	0.0056497	0.0630785	0.0279311	0.0388839
ALK2 PATHWAY	11	66441	2.78547	2	-0.143868	0.772754	100	50	SMAD4 (1.2 %)	0.00282885	0.0056497	0.00846257	0.0112675	0.00282885	0.0762558	0.0814747	0.127138	0.0604206	0.0550821	0.0279311	0.00846257	0.102057	0.00846257	0.0969551	0.078869	0.022408	0.0168535	0.00846257	0.0140645	0.0630785	0.0056497	0.00846257	0.0112675	0.022408	0.0251735	0.0470174	0.0251735	0.030681	0.0140645	0.0140645	0.00846257	0.022408	0.0140645	0.0140645	0.022408	0.0056497	0.0630785	0.0279311	0.0388839
TETRAHYDROBIOPTERIN BH4 SYNTHESIS RECYCLING SALVAGE AND REGULATION	13	59377	2.78547	2	-0.143868	0.772754	100	100	AKT1 (1.2 %)	0.00282885	0.0056497	0.00846257	0.0112675	0.00282885	0.0762558	0.0814747	0.127138	0.0604206	0.0550821	0.0279311	0.00846257	0.102057	0.00846257	0.0969551	0.078869	0.022408	0.0168535	0.00846257	0.0140645	0.0630785	0.0056497	0.00846257	0.0112675	0.022408	0.0251735	0.0470174	0.0251735	0.030681	0.0140645	0.0140645	0.00846257	0.022408	0.0140645	0.0140645	0.022408	0.0056497	0.0630785	0.0279311	0.0388839
ENOS ACTIVATION AND REGULATION	20	104971	2.78547	2	-0.143868	0.772754	100	100	AKT1 (1.2 %)	0.00282885	0.0056497	0.00846257	0.0112675	0.00282885	0.0762558	0.0814747	0.127138	0.0604206	0.0550821	0.0279311	0.00846257	0.102057	0.00846257	0.0969551	0.078869	0.022408	0.0168535	0.00846257	0.0140645	0.0630785	0.0056497	0.00846257	0.0112675	0.022408	0.0251735	0.0470174	0.0251735	0.030681	0.0140645	0.0140645	0.00846257	0.022408	0.0140645	0.0140645	0.022408	0.0056497	0.0630785	0.0279311	0.0388839
E2F ENABLED INHIBITION OF PRE REPLICATION COMPLEX FORMATION	10	47926	2.78547	2	-0.143868	0.772754	100	100	CDC25A (1.2 %)	0.00282885	0.0056497	0.00846257	0.0112675	0.00282885	0.0762558	0.0814747	0.127138	0.0604206	0.0550821	0.0279311	0.00846257	0.102057	0.00846257	0.0969551	0.078869	0.022408	0.0168535	0.00846257	0.0140645	0.0630785	0.0056497	0.00846257	0.0112675	0.022408	0.0251735	0.0470174	0.0251735	0.030681	0.0140645	0.0140645	0.00846257	0.022408	0.0140645	0.0140645	0.022408	0.0056497	0.0630785	0.0279311	0.0388839
APOPTOTIC CLEAVAGE OF CELL ADHESION PROTEINS	12	83628	2.78547	2	-0.143868	0.772754	100	100	CTNNB1 (1.2 %)	0.00282885	0.0056497	0.00846257	0.0112675	0.00282885	0.0762558	0.0814747	0.127138	0.0604206	0.0550821	0.0279311	0.00846257	0.102057	0.00846257	0.0969551	0.078869	0.022408	0.0168535	0.00846257	0.0140645	0.0630785	0.0056497	0.00846257	0.0112675	0.022408	0.0251735	0.0470174	0.0251735	0.030681	0.0140645	0.0140645	0.00846257	0.022408	0.0140645	0.0140645	0.022408	0.0056497	0.0630785	0.0279311	0.0388839
ASSOCIATION OF TRIC CCT WITH TARGET PROTEINS DURING BIOSYNTHESIS	27	148201	2.78547	2	-0.143868	0.772754	100	100	FBXW7 (1.2 %)	0.00282885	0.0056497	0.00846257	0.0112675	0.00282885	0.0762558	0.0814747	0.127138	0.0604206	0.0550821	0.0279311	0.00846257	0.102057	0.00846257	0.0969551	0.078869	0.022408	0.0168535	0.00846257	0.0140645	0.0630785	0.0056497	0.00846257	0.0112675	0.022408	0.0251735	0.0470174	0.0251735	0.030681	0.0140645	0.0140645	0.00846257	0.022408	0.0140645	0.0140645	0.022408	0.0056497	0.0630785	0.0279311	0.0388839
PROTEIN FOLDING	53	240301	2.78547	2	-0.143868	0.772754	100	100	FBXW7 (1.2 %)	0.00282885	0.0056497	0.00846257	0.0112675	0.00282885	0.0762558	0.0814747	0.127138	0.0604206	0.0550821	0.0279311	0.00846257	0.102057	0.00846257	0.0969551	0.078869	0.022408	0.0168535	0.00846257	0.0140645	0.0630785	0.0056497	0.00846257	0.0112675	0.022408	0.0251735	0.0470174	0.0251735	0.030681	0.0140645	0.0140645	0.00846257	0.022408	0.0140645	0.0140645	0.022408	0.0056497	0.0630785	0.0279311	0.0388839
CITRIC ACID CYCLE TCA CYCLE	26	98171	2.78547	2	-0.143868	0.772754	100	100	FH (1.2 %)	0.00282885	0.0056497	0.00846257	0.0112675	0.00282885	0.0762558	0.0814747	0.127138	0.0604206	0.0550821	0.0279311	0.00846257	0.102057	0.00846257	0.0969551	0.078869	0.022408	0.0168535	0.00846257	0.0140645	0.0630785	0.0056497	0.00846257	0.0112675	0.022408	0.0251735	0.0470174	0.0251735	0.030681	0.0140645	0.0140645	0.00846257	0.022408	0.0140645	0.0140645	0.022408	0.0056497	0.0630785	0.0279311	0.0388839
EICOSANOID LIGAND BINDING RECEPTORS	16	54687	2.78547	2	-0.143868	0.772754	100	100	CYSLTR2 (1.2 %)	0.00282885	0.0056497	0.00846257	0.0112675	0.00282885	0.0762558	0.0814747	0.127138	0.0604206	0.0550821	0.0279311	0.00846257	0.102057	0.00846257	0.0969551	0.078869	0.022408	0.0168535	0.00846257	0.0140645	0.0630785	0.0056497	0.00846257	0.0112675	0.022408	0.0251735	0.0470174	0.0251735	0.030681	0.0140645	0.0140645	0.00846257	0.022408	0.0140645	0.0140645	0.022408	0.0056497	0.0630785	0.0279311	0.0388839
DEADENYLATION OF MRNA	22	126790	2.78547	2	-0.143868	0.772754	100	100	EIF4G1 (1.2 %)	0.00282885	0.0056497	0.00846257	0.0112675	0.00282885	0.0762558	0.0814747	0.127138	0.0604206	0.0550821	0.0279311	0.00846257	0.102057	0.00846257	0.0969551	0.078869	0.022408	0.0168535	0.00846257	0.0140645	0.0630785	0.0056497	0.00846257	0.0112675	0.022408	0.0251735	0.0470174	0.0251735	0.030681	0.0140645	0.0140645	0.00846257	0.022408	0.0140645	0.0140645	0.022408	0.0056497	0.0630785	0.0279311	0.0388839
DEADENYLATION DEPENDENT MRNA DECAY	48	254240	2.78547	2	-0.143868	0.772754	100	100	EIF4G1 (1.2 %)	0.00282885	0.0056497	0.00846257	0.0112675	0.00282885	0.0762558	0.0814747	0.127138	0.0604206	0.0550821	0.0279311	0.00846257	0.102057	0.00846257	0.0969551	0.078869	0.022408	0.0168535	0.00846257	0.0140645	0.0630785	0.0056497	0.00846257	0.0112675	0.022408	0.0251735	0.0470174	0.0251735	0.030681	0.0140645	0.0140645	0.00846257	0.022408	0.0140645	0.0140645	0.022408	0.0056497	0.0630785	0.0279311	0.0388839
INCRETIN SYNTHESIS SECRETION AND INACTIVATION	22	83669	2.78547	2	-0.143868	0.772754	100	100	CTNNB1 (1.2 %)	0.00282885	0.0056497	0.00846257	0.0112675	0.00282885	0.0762558	0.0814747	0.127138	0.0604206	0.0550821	0.0279311	0.00846257	0.102057	0.00846257	0.0969551	0.078869	0.022408	0.0168535	0.00846257	0.0140645	0.0630785	0.0056497	0.00846257	0.0112675	0.022408	0.0251735	0.0470174	0.0251735	0.030681	0.0140645	0.0140645	0.00846257	0.022408	0.0140645	0.0140645	0.022408	0.0056497	0.0630785	0.0279311	0.0388839
SYNTHESIS SECRETION AND INACTIVATION OF GLP1	19	75628	2.78547	2	-0.143868	0.772754	100	100	CTNNB1 (1.2 %)	0.00282885	0.0056497	0.00846257	0.0112675	0.00282885	0.0762558	0.0814747	0.127138	0.0604206	0.0550821	0.0279311	0.00846257	0.102057	0.00846257	0.0969551	0.078869	0.022408	0.0168535	0.00846257	0.0140645	0.0630785	0.0056497	0.00846257	0.0112675	0.022408	0.0251735	0.0470174	0.0251735	0.030681	0.0140645	0.0140645	0.00846257	0.022408	0.0140645	0.0140645	0.022408	0.0056497	0.0630785	0.0279311	0.0388839
DESTABILIZATION OF MRNA BY BRF1	17	98784	2.78547	2	-0.143868	0.772754	100	100	AKT1 (1.2 %)	0.00282885	0.0056497	0.00846257	0.0112675	0.00282885	0.0762558	0.0814747	0.127138	0.0604206	0.0550821	0.0279311	0.00846257	0.102057	0.00846257	0.0969551	0.078869	0.022408	0.0168535	0.00846257	0.0140645	0.0630785	0.0056497	0.00846257	0.0112675	0.022408	0.0251735	0.0470174	0.0251735	0.030681	0.0140645	0.0140645	0.00846257	0.022408	0.0140645	0.0140645	0.022408	0.0056497	0.0630785	0.0279311	0.0388839
DESTABILIZATION OF MRNA BY KSRP	17	90442	2.78547	2	-0.143868	0.772754	100	100	AKT1 (1.2 %)	0.00282885	0.0056497	0.00846257	0.0112675	0.00282885	0.0762558	0.0814747	0.127138	0.0604206	0.0550821	0.0279311	0.00846257	0.102057	0.00846257	0.0969551	0.078869	0.022408	0.0168535	0.00846257	0.0140645	0.0630785	0.0056497	0.00846257	0.0112675	0.022408	0.0251735	0.0470174	0.0251735	0.030681	0.0140645	0.0140645	0.00846257	0.022408	0.0140645	0.0140645	0.022408	0.0056497	0.0630785	0.0279311	0.0388839
TRAF6 MEDIATED IRF7 ACTIVATION IN TLR7 8 OR 9 SIGNALING	10	44478	2.78547	2	-0.143868	0.772754	100	100	IRAK1 (1.2 %)	0.00282885	0.0056497	0.00846257	0.0112675	0.00282885	0.0762558	0.0814747	0.127138	0.0604206	0.0550821	0.0279311	0.00846257	0.102057	0.00846257	0.0969551	0.078869	0.022408	0.0168535	0.00846257	0.0140645	0.0630785	0.0056497	0.00846257	0.0112675	0.022408	0.0251735	0.0470174	0.0251735	0.030681	0.0140645	0.0140645	0.00846257	0.022408	0.0140645	0.0140645	0.022408	0.0056497	0.0630785	0.0279311	0.0388839
DESTABILIZATION OF MRNA BY AUF1 HNRNP D0	53	263345	2.78547	2	-0.143868	0.772754	100	100	EIF4G1 (1.2 %)	0.00282885	0.0056497	0.00846257	0.0112675	0.00282885	0.0762558	0.0814747	0.127138	0.0604206	0.0550821	0.0279311	0.00846257	0.102057	0.00846257	0.0969551	0.078869	0.022408	0.0168535	0.00846257	0.0140645	0.0630785	0.0056497	0.00846257	0.0112675	0.022408	0.0251735	0.0470174	0.0251735	0.030681	0.0140645	0.0140645	0.00846257	0.022408	0.0140645	0.0140645	0.022408	0.0056497	0.0630785	0.0279311	0.0388839
MPR PATHWAY	34	203224	15.1752	13	-0.0671915	0.773872	100	92.3077	GNAS (4.29 %) PRKACB (1.84 %) HRAS (0.61 %) SRC (0.61 %) PRKAR1A (0.61 %) RPS6KA1 (0.61 %)	0.0168535	0.033423	0.0497133	0.0657289	0.0168535	0.378687	0.399453	0.557743	0.31198	0.288189	0.156311	0.0497133	0.475805	0.0497133	0.457679	0.389159	0.127138	0.0969551	0.0497133	0.0814747	0.323576	0.033423	0.0497133	0.0657289	0.127138	0.141848	0.250952	0.141848	0.17053	0.0814747	0.0814747	0.0497133	0.127138	0.0814747	0.0814747	0.127138	0.033423	0.323576	0.156311	0.211766
HCMV PATHWAY	17	121302	15.1752	13	-0.0671915	0.773872	100	76.9231	RB1 (4.29 %) PIK3CG (3.07 %) AKT1 (1.23 %) RELA (0.61 %) MAP2K6 (0.61 %) PIK3CA (0.61 %)	0.0168535	0.033423	0.0497133	0.0657289	0.0168535	0.378687	0.399453	0.557743	0.31198	0.288189	0.156311	0.0497133	0.475805	0.0497133	0.457679	0.389159	0.127138	0.0969551	0.0497133	0.0814747	0.323576	0.033423	0.0497133	0.0657289	0.127138	0.141848	0.250952	0.141848	0.17053	0.0814747	0.0814747	0.0497133	0.127138	0.0814747	0.0814747	0.127138	0.033423	0.323576	0.156311	0.211766
G0 AND EARLY G1	25	105127	15.1752	13	-0.0671915	0.773872	100	84.6154	RBL1 (2.45 %) TFDP1 (2.45 %) MYBL2 (1.23 %) RBL2 (1.23 %) CDC25A (1.23 %) CCNE1 (0.61 %)	0.0168535	0.033423	0.0497133	0.0657289	0.0168535	0.378687	0.399453	0.557743	0.31198	0.288189	0.156311	0.0497133	0.475805	0.0497133	0.457679	0.389159	0.127138	0.0969551	0.0497133	0.0814747	0.323576	0.033423	0.0497133	0.0657289	0.127138	0.141848	0.250952	0.141848	0.17053	0.0814747	0.0814747	0.0497133	0.127138	0.0814747	0.0814747	0.127138	0.033423	0.323576	0.156311	0.211766
HIVNEF PATHWAY	58	393097	21.5996	19	-0.055693	0.777943	100	84.2105	RB1 (4.29 %) PRKDC (4.29 %) PTK2 (1.23 %) MDM2 (1.23 %) RIPK1 (0.61 %) PRKCD (0.61 %) MAPK8 (0.61 %) RELA (0.61 %) CDK11A (0.61 %)	0.0251735	0.0497133	0.0736353	0.0969551	0.0251735	0.51026	0.534607	0.705888	0.429309	0.399453	0.225051	0.0736353	0.620476	0.0736353	0.600622	0.522589	0.18451	0.141848	0.0736353	0.119688	0.443675	0.0497133	0.0736353	0.0969551	0.18451	0.205039	0.351717	0.205039	0.244559	0.119688	0.119688	0.0736353	0.18451	0.119688	0.119688	0.18451	0.0497133	0.443675	0.225051	0.300186
ACH PATHWAY	16	96907	19.5303	17	-0.0602609	0.781163	100	88.2353	TERT (3.07 %) PIK3CG (3.07 %) PTK2 (1.23 %) FOXO3 (1.23 %) AKT1 (1.23 %) SRC (0.61 %) PIK3CA (0.61 %) MUSK (0.61 %)	0.022408	0.0443139	0.0657289	0.0866641	0.022408	0.469832	0.493326	0.663049	0.39261	0.364446	0.202783	0.0657289	0.577341	0.0657289	0.557743	0.481712	0.165818	0.127138	0.0657289	0.10713	0.40622	0.0443139	0.0657289	0.0866641	0.165818	0.18451	0.319732	0.18451	0.220647	0.10713	0.10713	0.0657289	0.165818	0.10713	0.10713	0.165818	0.0443139	0.40622	0.202783	0.271873
STATHMIN PATHWAY	19	99983	5.45893	4	-0.135047	0.804914	100	100	PRKACB (1.84 %) PRKAR1A (0.61 %)	0.0056497	0.0112675	0.0168535	0.022408	0.0056497	0.146697	0.156311	0.238111	0.117191	0.10713	0.0550821	0.0168535	0.193698	0.0168535	0.18451	0.151518	0.0443139	0.033423	0.0168535	0.0279311	0.122178	0.0112675	0.0168535	0.022408	0.0443139	0.0497133	0.0918242	0.0497133	0.0604206	0.0279311	0.0279311	0.0168535	0.0443139	0.0279311	0.0279311	0.0443139	0.0112675	0.122178	0.0550821	0.0762558
CARM1 PATHWAY	13	96176	5.45893	4	-0.135047	0.804914	100	100	PRKACB (1.84 %) PRKAR1A (0.61 %)	0.0056497	0.0112675	0.0168535	0.022408	0.0056497	0.146697	0.156311	0.238111	0.117191	0.10713	0.0550821	0.0168535	0.193698	0.0168535	0.18451	0.151518	0.0443139	0.033423	0.0168535	0.0279311	0.122178	0.0112675	0.0168535	0.022408	0.0443139	0.0497133	0.0918242	0.0497133	0.0604206	0.0279311	0.0279311	0.0168535	0.0443139	0.0279311	0.0279311	0.0443139	0.0112675	0.122178	0.0550821	0.0762558
TUMOR NECROSIS FACTOR PATHWAY	29	175768	5.45893	4	-0.135047	0.804914	100	100	MAP3K3 (1.84 %) RIPK1 (0.61 %)	0.0056497	0.0112675	0.0168535	0.022408	0.0056497	0.146697	0.156311	0.238111	0.117191	0.10713	0.0550821	0.0168535	0.193698	0.0168535	0.18451	0.151518	0.0443139	0.033423	0.0168535	0.0279311	0.122178	0.0112675	0.0168535	0.022408	0.0443139	0.0497133	0.0918242	0.0497133	0.0604206	0.0279311	0.0279311	0.0168535	0.0443139	0.0279311	0.0279311	0.0443139	0.0112675	0.122178	0.0550821	0.0762558
HDAC CLASSII PATHWAY	34	255903	5.45893	4	-0.135047	0.804914	100	100	GATA1 (1.2 %) BCL6 (1.2 %)	0.0056497	0.0112675	0.0168535	0.022408	0.0056497	0.146697	0.156311	0.238111	0.117191	0.10713	0.0550821	0.0168535	0.193698	0.0168535	0.18451	0.151518	0.0443139	0.033423	0.0168535	0.0279311	0.122178	0.0112675	0.0168535	0.022408	0.0443139	0.0497133	0.0918242	0.0497133	0.0604206	0.0279311	0.0279311	0.0168535	0.0443139	0.0279311	0.0279311	0.0443139	0.0112675	0.122178	0.0550821	0.0762558
LPA4 PATHWAY	15	152336	5.45893	4	-0.135047	0.804914	100	100	PRKCE (1.84 %) PRKACA (0.61 %)	0.0056497	0.0112675	0.0168535	0.022408	0.0056497	0.146697	0.156311	0.238111	0.117191	0.10713	0.0550821	0.0168535	0.193698	0.0168535	0.18451	0.151518	0.0443139	0.033423	0.0168535	0.0279311	0.122178	0.0112675	0.0168535	0.022408	0.0443139	0.0497133	0.0918242	0.0497133	0.0604206	0.0279311	0.0279311	0.0168535	0.0443139	0.0279311	0.0279311	0.0443139	0.0112675	0.122178	0.0550821	0.0762558
P38 MK2 PATHWAY	21	115110	5.45893	4	-0.135047	0.804914	100	100	TSC2 (1.84 %) RAF1 (0.61 %)	0.0056497	0.0112675	0.0168535	0.022408	0.0056497	0.146697	0.156311	0.238111	0.117191	0.10713	0.0550821	0.0168535	0.193698	0.0168535	0.18451	0.151518	0.0443139	0.033423	0.0168535	0.0279311	0.122178	0.0112675	0.0168535	0.022408	0.0443139	0.0497133	0.0918242	0.0497133	0.0604206	0.0279311	0.0279311	0.0168535	0.0443139	0.0279311	0.0279311	0.0443139	0.0112675	0.122178	0.0550821	0.0762558
ACTIVATED NOTCH1 TRANSMITS SIGNAL TO THE NUCLEUS	27	152691	5.45893	4	-0.135047	0.804914	100	100	JAG2 (1.84 %) JAG1 (0.61 %)	0.0056497	0.0112675	0.0168535	0.022408	0.0056497	0.146697	0.156311	0.238111	0.117191	0.10713	0.0550821	0.0168535	0.193698	0.0168535	0.18451	0.151518	0.0443139	0.033423	0.0168535	0.0279311	0.122178	0.0112675	0.0168535	0.022408	0.0443139	0.0497133	0.0918242	0.0497133	0.0604206	0.0279311	0.0279311	0.0168535	0.0443139	0.0279311	0.0279311	0.0443139	0.0112675	0.122178	0.0550821	0.0762558
GLUCONEOGENESIS	34	117600	5.45893	4	-0.135047	0.804914	100	100	PRKACB (1.84 %) PRKACA (0.61 %)	0.0056497	0.0112675	0.0168535	0.022408	0.0056497	0.146697	0.156311	0.238111	0.117191	0.10713	0.0550821	0.0168535	0.193698	0.0168535	0.18451	0.151518	0.0443139	0.033423	0.0168535	0.0279311	0.122178	0.0112675	0.0168535	0.022408	0.0443139	0.0497133	0.0918242	0.0497133	0.0604206	0.0279311	0.0279311	0.0168535	0.0443139	0.0279311	0.0279311	0.0443139	0.0112675	0.122178	0.0550821	0.0762558
SLC MEDIATED TRANSMEMBRANE TRANSPORT	241	1445794	5.45893	4	-0.135047	0.804914	100	100	SLC38A3 (1.84 %) GCK (0.61 %)	0.0056497	0.0112675	0.0168535	0.022408	0.0056497	0.146697	0.156311	0.238111	0.117191	0.10713	0.0550821	0.0168535	0.193698	0.0168535	0.18451	0.151518	0.0443139	0.033423	0.0168535	0.0279311	0.122178	0.0112675	0.0168535	0.022408	0.0443139	0.0497133	0.0918242	0.0497133	0.0604206	0.0279311	0.0279311	0.0168535	0.0443139	0.0279311	0.0279311	0.0443139	0.0112675	0.122178	0.0550821	0.0762558
REGULATION OF RHEB GTPASE ACTIVITY BY AMPK	10	66820	5.45893	4	-0.135047	0.804914	100	75	TSC2 (1.8 %) TSC1 (1.2 %)	0.0056497	0.0112675	0.0168535	0.022408	0.0056497	0.146697	0.156311	0.238111	0.117191	0.10713	0.0550821	0.0168535	0.193698	0.0168535	0.18451	0.151518	0.0443139	0.033423	0.0168535	0.0279311	0.122178	0.0112675	0.0168535	0.022408	0.0443139	0.0497133	0.0918242	0.0497133	0.0604206	0.0279311	0.0279311	0.0168535	0.0443139	0.0279311	0.0279311	0.0443139	0.0112675	0.122178	0.0550821	0.0762558
HORMONE SENSITIVE LIPASE HSL MEDIATED TRIACYLGLYCEROL HYDROLYSIS	13	57615	5.45893	4	-0.135047	0.804914	100	100	PRKACB (1.84 %) PRKACA (0.61 %)	0.0056497	0.0112675	0.0168535	0.022408	0.0056497	0.146697	0.156311	0.238111	0.117191	0.10713	0.0550821	0.0168535	0.193698	0.0168535	0.18451	0.151518	0.0443139	0.033423	0.0168535	0.0279311	0.122178	0.0112675	0.0168535	0.022408	0.0443139	0.0497133	0.0918242	0.0497133	0.0604206	0.0279311	0.0279311	0.0168535	0.0443139	0.0279311	0.0279311	0.0443139	0.0112675	0.122178	0.0550821	0.0762558
LIPID DIGESTION MOBILIZATION AND TRANSPORT	46	230721	5.45893	4	-0.135047	0.804914	100	100	PRKACB (1.84 %) PRKACA (0.61 %)	0.0056497	0.0112675	0.0168535	0.022408	0.0056497	0.146697	0.156311	0.238111	0.117191	0.10713	0.0550821	0.0168535	0.193698	0.0168535	0.18451	0.151518	0.0443139	0.033423	0.0168535	0.0279311	0.122178	0.0112675	0.0168535	0.022408	0.0443139	0.0497133	0.0918242	0.0497133	0.0604206	0.0279311	0.0279311	0.0168535	0.0443139	0.0279311	0.0279311	0.0443139	0.0112675	0.122178	0.0550821	0.0762558
MTORC1 MEDIATED SIGNALLING	11	77330	5.45893	4	-0.135047	0.804914	100	100	EIF4G1 (1.2 %) RPTOR (1.2 %)	0.0056497	0.0112675	0.0168535	0.022408	0.0056497	0.146697	0.156311	0.238111	0.117191	0.10713	0.0550821	0.0168535	0.193698	0.0168535	0.18451	0.151518	0.0443139	0.033423	0.0168535	0.0279311	0.122178	0.0112675	0.0168535	0.022408	0.0443139	0.0497133	0.0918242	0.0497133	0.0604206	0.0279311	0.0279311	0.0168535	0.0443139	0.0279311	0.0279311	0.0443139	0.0112675	0.122178	0.0550821	0.0762558
GLUCOSE METABOLISM	69	305928	5.45893	4	-0.135047	0.804914	100	100	PRKACB (1.84 %) PRKACA (0.61 %)	0.0056497	0.0112675	0.0168535	0.022408	0.0056497	0.146697	0.156311	0.238111	0.117191	0.10713	0.0550821	0.0168535	0.193698	0.0168535	0.18451	0.151518	0.0443139	0.033423	0.0168535	0.0279311	0.122178	0.0112675	0.0168535	0.022408	0.0443139	0.0497133	0.0918242	0.0497133	0.0604206	0.0279311	0.0279311	0.0168535	0.0443139	0.0279311	0.0279311	0.0443139	0.0112675	0.122178	0.0550821	0.0762558
NEUROACTIVE LIGAND RECEPTOR INTERACTION	272	1235991	8.02798	6	-0.126455	0.827205	100	100	TSHR (1.84 %) CYSLTR2 (1.23 %) P2RX6 (0.61 %)	0.00846257	0.0168535	0.0251735	0.033423	0.00846257	0.211766	0.225051	0.334976	0.17053	0.156311	0.0814747	0.0251735	0.275987	0.0251735	0.263576	0.218437	0.0657289	0.0497133	0.0251735	0.0416027	0.17755	0.0168535	0.0251735	0.033423	0.0657289	0.0736353	0.134524	0.0736353	0.0892478	0.0416027	0.0416027	0.0251735	0.0657289	0.0416027	0.0416027	0.0657289	0.0168535	0.17755	0.0814747	0.112175
NOS1 PATHWAY	24	169377	8.02798	6	-0.126455	0.827205	100	100	PRKACB (1.84 %) PRKCB (1.23 %) PRKAR1A (0.61 %)	0.00846257	0.0168535	0.0251735	0.033423	0.00846257	0.211766	0.225051	0.334976	0.17053	0.156311	0.0814747	0.0251735	0.275987	0.0251735	0.263576	0.218437	0.0657289	0.0497133	0.0251735	0.0416027	0.17755	0.0168535	0.0251735	0.033423	0.0657289	0.0736353	0.134524	0.0736353	0.0892478	0.0416027	0.0416027	0.0251735	0.0657289	0.0416027	0.0416027	0.0657289	0.0168535	0.17755	0.0814747	0.112175
DREAM PATHWAY	14	78299	8.02798	6	-0.126455	0.827205	100	100	PRKACB (1.84 %) FOS (1.23 %) PRKAR1A (0.61 %)	0.00846257	0.0168535	0.0251735	0.033423	0.00846257	0.211766	0.225051	0.334976	0.17053	0.156311	0.0814747	0.0251735	0.275987	0.0251735	0.263576	0.218437	0.0657289	0.0497133	0.0251735	0.0416027	0.17755	0.0168535	0.0251735	0.033423	0.0657289	0.0736353	0.134524	0.0736353	0.0892478	0.0416027	0.0416027	0.0251735	0.0657289	0.0416027	0.0416027	0.0657289	0.0168535	0.17755	0.0814747	0.112175
ARF6 TRAFFICKING PATHWAY	49	361310	8.02798	6	-0.126455	0.827205	100	100	TSHR (1.84 %) CTNNB1 (1.23 %) RALA (0.61 %)	0.00846257	0.0168535	0.0251735	0.033423	0.00846257	0.211766	0.225051	0.334976	0.17053	0.156311	0.0814747	0.0251735	0.275987	0.0251735	0.263576	0.218437	0.0657289	0.0497133	0.0251735	0.0416027	0.17755	0.0168535	0.0251735	0.033423	0.0657289	0.0736353	0.134524	0.0736353	0.0892478	0.0416027	0.0416027	0.0251735	0.0657289	0.0416027	0.0416027	0.0657289	0.0168535	0.17755	0.0814747	0.112175
RHOA REG PATHWAY	46	439264	8.02798	6	-0.126455	0.827205	100	100	VAV1 (1.2 %) VAV2 (1.2 %) VAV3 (1.2 %)	0.00846257	0.0168535	0.0251735	0.033423	0.00846257	0.211766	0.225051	0.334976	0.17053	0.156311	0.0814747	0.0251735	0.275987	0.0251735	0.263576	0.218437	0.0657289	0.0497133	0.0251735	0.0416027	0.17755	0.0168535	0.0251735	0.033423	0.0657289	0.0736353	0.134524	0.0736353	0.0892478	0.0416027	0.0416027	0.0251735	0.0657289	0.0416027	0.0416027	0.0657289	0.0168535	0.17755	0.0814747	0.112175
SYNDECAN 4 PATHWAY	32	223985	8.02798	6	-0.126455	0.827205	100	100	FGFR1 (1.84 %) PTK2 (1.23 %) PRKCD (0.61 %)	0.00846257	0.0168535	0.0251735	0.033423	0.00846257	0.211766	0.225051	0.334976	0.17053	0.156311	0.0814747	0.0251735	0.275987	0.0251735	0.263576	0.218437	0.0657289	0.0497133	0.0251735	0.0416027	0.17755	0.0168535	0.0251735	0.033423	0.0657289	0.0736353	0.134524	0.0736353	0.0892478	0.0416027	0.0416027	0.0251735	0.0657289	0.0416027	0.0416027	0.0657289	0.0168535	0.17755	0.0814747	0.112175
TCR JNK PATHWAY	14	91283	8.02798	6	-0.126455	0.827205	100	100	MAP4K1 (1.84 %) PRKCB (1.23 %) MAPK8 (0.61 %)	0.00846257	0.0168535	0.0251735	0.033423	0.00846257	0.211766	0.225051	0.334976	0.17053	0.156311	0.0814747	0.0251735	0.275987	0.0251735	0.263576	0.218437	0.0657289	0.0497133	0.0251735	0.0416027	0.17755	0.0168535	0.0251735	0.033423	0.0657289	0.0736353	0.134524	0.0736353	0.0892478	0.0416027	0.0416027	0.0251735	0.0657289	0.0416027	0.0416027	0.0657289	0.0168535	0.17755	0.0814747	0.112175
RAC1 REG PATHWAY	38	324948	8.02798	6	-0.126455	0.827205	100	100	VAV2 (1.2 %) VAV1 (1.2 %) VAV3 (1.2 %)	0.00846257	0.0168535	0.0251735	0.033423	0.00846257	0.211766	0.225051	0.334976	0.17053	0.156311	0.0814747	0.0251735	0.275987	0.0251735	0.263576	0.218437	0.0657289	0.0497133	0.0251735	0.0416027	0.17755	0.0168535	0.0251735	0.033423	0.0657289	0.0736353	0.134524	0.0736353	0.0892478	0.0416027	0.0416027	0.0251735	0.0657289	0.0416027	0.0416027	0.0657289	0.0168535	0.17755	0.0814747	0.112175
TOLL ENDOGENOUS PATHWAY	25	109941	8.02798	6	-0.126455	0.827205	100	100	IRAK2 (1.84 %) IRAK1 (1.23 %) IKBKB (0.61 %)	0.00846257	0.0168535	0.0251735	0.033423	0.00846257	0.211766	0.225051	0.334976	0.17053	0.156311	0.0814747	0.0251735	0.275987	0.0251735	0.263576	0.218437	0.0657289	0.0497133	0.0251735	0.0416027	0.17755	0.0168535	0.0251735	0.033423	0.0657289	0.0736353	0.134524	0.0736353	0.0892478	0.0416027	0.0416027	0.0251735	0.0657289	0.0416027	0.0416027	0.0657289	0.0168535	0.17755	0.0814747	0.112175
SPRY REGULATION OF FGF SIGNALING	14	83958	8.02798	6	-0.126455	0.827205	100	100	BRAF (1.84 %) MKNK1 (1.23 %) SRC (0.61 %)	0.00846257	0.0168535	0.0251735	0.033423	0.00846257	0.211766	0.225051	0.334976	0.17053	0.156311	0.0814747	0.0251735	0.275987	0.0251735	0.263576	0.218437	0.0657289	0.0497133	0.0251735	0.0416027	0.17755	0.0168535	0.0251735	0.033423	0.0657289	0.0736353	0.134524	0.0736353	0.0892478	0.0416027	0.0416027	0.0251735	0.0657289	0.0416027	0.0416027	0.0657289	0.0168535	0.17755	0.0814747	0.112175
PRE NOTCH PROCESSING IN GOLGI	16	161057	8.02798	6	-0.126455	0.827205	100	100	NOTCH4 (1.84 %) NOTCH3 (1.23 %) NOTCH2 (0.61 %)	0.00846257	0.0168535	0.0251735	0.033423	0.00846257	0.211766	0.225051	0.334976	0.17053	0.156311	0.0814747	0.0251735	0.275987	0.0251735	0.263576	0.218437	0.0657289	0.0497133	0.0251735	0.0416027	0.17755	0.0168535	0.0251735	0.033423	0.0657289	0.0736353	0.134524	0.0736353	0.0892478	0.0416027	0.0416027	0.0251735	0.0657289	0.0416027	0.0416027	0.0657289	0.0168535	0.17755	0.0814747	0.112175
SIGNALING BY NOTCH3	12	77158	8.02798	6	-0.126455	0.827205	100	100	JAG2 (1.84 %) NOTCH3 (1.23 %) JAG1 (0.61 %)	0.00846257	0.0168535	0.0251735	0.033423	0.00846257	0.211766	0.225051	0.334976	0.17053	0.156311	0.0814747	0.0251735	0.275987	0.0251735	0.263576	0.218437	0.0657289	0.0497133	0.0251735	0.0416027	0.17755	0.0168535	0.0251735	0.033423	0.0657289	0.0736353	0.134524	0.0736353	0.0892478	0.0416027	0.0416027	0.0251735	0.0657289	0.0416027	0.0416027	0.0657289	0.0168535	0.17755	0.0814747	0.112175
CRMPS IN SEMA3A SIGNALING	14	106533	8.02798	6	-0.126455	0.827205	100	100	FYN (1.84 %) FES (1.23 %) CDK5 (0.61 %)	0.00846257	0.0168535	0.0251735	0.033423	0.00846257	0.211766	0.225051	0.334976	0.17053	0.156311	0.0814747	0.0251735	0.275987	0.0251735	0.263576	0.218437	0.0657289	0.0497133	0.0251735	0.0416027	0.17755	0.0168535	0.0251735	0.033423	0.0657289	0.0736353	0.134524	0.0736353	0.0892478	0.0416027	0.0416027	0.0251735	0.0657289	0.0416027	0.0416027	0.0657289	0.0168535	0.17755	0.0814747	0.112175
CD28 DEPENDENT VAV1 PATHWAY	11	50571	8.02798	6	-0.126455	0.827205	100	100	FYN (1.84 %) VAV1 (1.23 %) LCK (0.61 %)	0.00846257	0.0168535	0.0251735	0.033423	0.00846257	0.211766	0.225051	0.334976	0.17053	0.156311	0.0814747	0.0251735	0.275987	0.0251735	0.263576	0.218437	0.0657289	0.0497133	0.0251735	0.0416027	0.17755	0.0168535	0.0251735	0.033423	0.0657289	0.0736353	0.134524	0.0736353	0.0892478	0.0416027	0.0416027	0.0251735	0.0657289	0.0416027	0.0416027	0.0657289	0.0168535	0.17755	0.0814747	0.112175
JNK C JUN KINASES PHOSPHORYLATION AND ACTIVATION MEDIATED BY ACTIVATED HUMAN TAK1	16	100749	8.02798	6	-0.126455	0.827205	100	100	IRAK2 (1.84 %) IRAK1 (1.23 %) MAPK8 (0.61 %)	0.00846257	0.0168535	0.0251735	0.033423	0.00846257	0.211766	0.225051	0.334976	0.17053	0.156311	0.0814747	0.0251735	0.275987	0.0251735	0.263576	0.218437	0.0657289	0.0497133	0.0251735	0.0416027	0.17755	0.0168535	0.0251735	0.033423	0.0657289	0.0736353	0.134524	0.0736353	0.0892478	0.0416027	0.0416027	0.0251735	0.0657289	0.0416027	0.0416027	0.0657289	0.0168535	0.17755	0.0814747	0.112175
ACTIVATED TAK1 MEDIATES P38 MAPK ACTIVATION	18	89062	8.02798	6	-0.126455	0.827205	100	100	IRAK2 (1.84 %) IRAK1 (1.23 %) MAP2K6 (0.61 %)	0.00846257	0.0168535	0.0251735	0.033423	0.00846257	0.211766	0.225051	0.334976	0.17053	0.156311	0.0814747	0.0251735	0.275987	0.0251735	0.263576	0.218437	0.0657289	0.0497133	0.0251735	0.0416027	0.17755	0.0168535	0.0251735	0.033423	0.0657289	0.0736353	0.134524	0.0736353	0.0892478	0.0416027	0.0416027	0.0251735	0.0657289	0.0416027	0.0416027	0.0657289	0.0168535	0.17755	0.0814747	0.112175
DCC MEDIATED ATTRACTIVE SIGNALING	13	104776	8.02798	6	-0.126455	0.827205	100	100	FYN (1.84 %) PTK2 (1.23 %) SRC (0.61 %)	0.00846257	0.0168535	0.0251735	0.033423	0.00846257	0.211766	0.225051	0.334976	0.17053	0.156311	0.0814747	0.0251735	0.275987	0.0251735	0.263576	0.218437	0.0657289	0.0497133	0.0251735	0.0416027	0.17755	0.0168535	0.0251735	0.033423	0.0657289	0.0736353	0.134524	0.0736353	0.0892478	0.0416027	0.0416027	0.0251735	0.0657289	0.0416027	0.0416027	0.0657289	0.0168535	0.17755	0.0814747	0.112175
THE ROLE OF NEF IN HIV1 REPLICATION AND DISEASE PATHOGENESIS	28	186771	8.02798	6	-0.126455	0.827205	100	66.6667	FYN (1.84 %) HCK (1.84 %) LCK (0.61 %)	0.00846257	0.0168535	0.0251735	0.033423	0.00846257	0.211766	0.225051	0.334976	0.17053	0.156311	0.0814747	0.0251735	0.275987	0.0251735	0.263576	0.218437	0.0657289	0.0497133	0.0251735	0.0416027	0.17755	0.0168535	0.0251735	0.033423	0.0657289	0.0736353	0.134524	0.0736353	0.0892478	0.0416027	0.0416027	0.0251735	0.0657289	0.0416027	0.0416027	0.0657289	0.0168535	0.17755	0.0814747	0.112175
NONSENSE MEDIATED DECAY ENHANCED BY THE EXON JUNCTION COMPLEX	176	477457	8.02798	6	-0.126455	0.827205	100	100	SMG1 (1.84 %) EIF4G1 (1.23 %) RPSA (0.61 %)	0.00846257	0.0168535	0.0251735	0.033423	0.00846257	0.211766	0.225051	0.334976	0.17053	0.156311	0.0814747	0.0251735	0.275987	0.0251735	0.263576	0.218437	0.0657289	0.0497133	0.0251735	0.0416027	0.17755	0.0168535	0.0251735	0.033423	0.0657289	0.0736353	0.134524	0.0736353	0.0892478	0.0416027	0.0416027	0.0251735	0.0657289	0.0416027	0.0416027	0.0657289	0.0168535	0.17755	0.0814747	0.112175
PI3K AKT ACTIVATION	38	264334	25.5423	22	-0.0648373	0.829283	100	81.8182	NTRK1 (4.29 %) PTEN (2.45 %) IRS1 (1.84 %) TSC2 (1.84 %) AKT1 (1.23 %) FOXO3 (1.23 %) MDM2 (1.23 %) PIK3R2 (1.23 %) AKT3 (0.61 %) GSK3A (0.61 %) PIK3CA (0.61 %)	0.030681	0.0604206	0.0892478	0.117191	0.030681	0.582103	0.607353	0.77592	0.496188	0.46379	0.267736	0.0892478	0.69399	0.0892478	0.674311	0.594925	0.220647	0.17053	0.0892478	0.144276	0.511646	0.0604206	0.0892478	0.117191	0.220647	0.244559	0.411245	0.244559	0.290203	0.144276	0.144276	0.0892478	0.220647	0.144276	0.144276	0.220647	0.0604206	0.511646	0.267736	0.353551
PPARA PATHWAY	58	382347	23.6024	20	-0.0719256	0.83991	100	85	RB1 (4.29 %) PIK3CG (3.07 %) PRKACB (1.84 %) PRKCB (1.23 %) STAT5B (1.23 %) MYC (1.23 %) STAT5A (0.61 %) RELA (0.61 %) PIK3CA (0.61 %) PRKAR1A (0.61 %)	0.0279311	0.0550821	0.0814747	0.10713	0.0279311	0.547606	0.572525	0.743281	0.46379	0.432533	0.246696	0.0814747	0.659209	0.0814747	0.639344	0.560242	0.202783	0.156311	0.0814747	0.132069	0.478767	0.0550821	0.0814747	0.10713	0.202783	0.225051	0.382197	0.225051	0.267736	0.132069	0.132069	0.0814747	0.202783	0.132069	0.132069	0.202783	0.0550821	0.478767	0.246696	0.327397
PI METABOLISM	48	328680	23.6024	20	-0.0719256	0.83991	100	85	PIK3C3 (3.07 %) PIK3CG (3.07 %) PIK3C2G (2.45 %) PTEN (2.45 %) PIK3C2A (1.23 %) PIK3CD (1.23 %) PIK3R2 (1.23 %) PIK3C2B (0.61 %) PIK3CA (0.61 %) PI4KA (0.61 %)	0.0279311	0.0550821	0.0814747	0.10713	0.0279311	0.547606	0.572525	0.743281	0.46379	0.432533	0.246696	0.0814747	0.659209	0.0814747	0.639344	0.560242	0.202783	0.156311	0.0814747	0.132069	0.478767	0.0550821	0.0814747	0.10713	0.202783	0.225051	0.382197	0.225051	0.267736	0.132069	0.132069	0.0814747	0.202783	0.132069	0.132069	0.202783	0.0550821	0.478767	0.246696	0.327397
PHOSPHATIDYLINOSITOL SIGNALING SYSTEM	76	598818	31.0188	27	-0.0602612	0.841398	100	81.4815	PIK3C3 (3.07 %) PIK3CG (3.07 %) PRKCG (2.45 %) PIK3C2G (2.45 %) PTEN (2.45 %) PRKCB (1.23 %) PIK3C2A (1.23 %) PIK3CD (1.23 %) PLCG2 (1.23 %) PIK3R2 (1.23 %) PIK3C2B (0.61 %) PIK3CA (0.61 %) PLCG1 (0.61 %) PI4KA (0.61 %)	0.0388839	0.0762558	0.112175	0.146697	0.0388839	0.6706	0.695718	0.850981	0.582103	0.547606	0.327397	0.112175	0.778444	0.112175	0.760155	0.683408	0.271873	0.211766	0.112175	0.179876	0.598353	0.0762558	0.112175	0.146697	0.271873	0.300186	0.490447	0.300186	0.353551	0.179876	0.179876	0.112175	0.271873	0.179876	0.179876	0.271873	0.0762558	0.598353	0.327397	0.426066
PATHOGENIC ESCHERICHIA COLI INFECTION	59	269262	10.4996	8	-0.118082	0.841593	100	100	FYN (1.84 %) ABL1 (1.23 %) CTNNB1 (1.23 %) ROCK1 (0.61 %)	0.0112675	0.022408	0.033423	0.0443139	0.0112675	0.271873	0.288189	0.419525	0.220647	0.202783	0.10713	0.033423	0.349878	0.033423	0.334976	0.280078	0.0866641	0.0657289	0.033423	0.0550821	0.229429	0.022408	0.033423	0.0443139	0.0866641	0.0969551	0.175217	0.0969551	0.117191	0.0550821	0.0550821	0.033423	0.0866641	0.0550821	0.0550821	0.0866641	0.022408	0.229429	0.10713	0.146697
VIRAL MYOCARDITIS	73	683609	10.4996	8	-0.118082	0.841593	100	100	FYN (1.84 %) ABL1 (1.23 %) EIF4G1 (1.23 %) ABL2 (0.61 %)	0.0112675	0.022408	0.033423	0.0443139	0.0112675	0.271873	0.288189	0.419525	0.220647	0.202783	0.10713	0.033423	0.349878	0.033423	0.334976	0.280078	0.0866641	0.0657289	0.033423	0.0550821	0.229429	0.022408	0.033423	0.0443139	0.0866641	0.0969551	0.175217	0.0969551	0.117191	0.0550821	0.0550821	0.033423	0.0866641	0.0550821	0.0550821	0.0866641	0.022408	0.229429	0.10713	0.146697
BCELLSURVIVAL PATHWAY	16	114604	10.4996	8	-0.118082	0.841593	100	75	PIK3CG (3.07 %) AKT1 (1.23 %) FOS (1.23 %) PIK3CA (0.61 %)	0.0112675	0.022408	0.033423	0.0443139	0.0112675	0.271873	0.288189	0.419525	0.220647	0.202783	0.10713	0.033423	0.349878	0.033423	0.334976	0.280078	0.0866641	0.0657289	0.033423	0.0550821	0.229429	0.022408	0.033423	0.0443139	0.0866641	0.0969551	0.175217	0.0969551	0.117191	0.0550821	0.0550821	0.033423	0.0866641	0.0550821	0.0550821	0.0866641	0.022408	0.229429	0.10713	0.146697
CTLA4 PATHWAY	21	103674	10.4996	8	-0.118082	0.841593	100	87.5	PTPN11 (1.84 %) ITK (1.84 %) PIK3CA (0.61 %) LCK (0.61 %)	0.0112675	0.022408	0.033423	0.0443139	0.0112675	0.271873	0.288189	0.419525	0.220647	0.202783	0.10713	0.033423	0.349878	0.033423	0.334976	0.280078	0.0866641	0.0657289	0.033423	0.0550821	0.229429	0.022408	0.033423	0.0443139	0.0866641	0.0969551	0.175217	0.0969551	0.117191	0.0550821	0.0550821	0.033423	0.0866641	0.0550821	0.0550821	0.0866641	0.022408	0.229429	0.10713	0.146697
NOTCH1 INTRACELLULAR DOMAIN REGULATES TRANSCRIPTION	46	321817	10.4996	8	-0.118082	0.841593	100	100	MAML1 (1.84 %) MYC (1.23 %) FBXW7 (1.23 %) MAML2 (0.61 %)	0.0112675	0.022408	0.033423	0.0443139	0.0112675	0.271873	0.288189	0.419525	0.220647	0.202783	0.10713	0.033423	0.349878	0.033423	0.334976	0.280078	0.0866641	0.0657289	0.033423	0.0550821	0.229429	0.022408	0.033423	0.0443139	0.0866641	0.0969551	0.175217	0.0969551	0.117191	0.0550821	0.0550821	0.033423	0.0866641	0.0550821	0.0550821	0.0866641	0.022408	0.229429	0.10713	0.146697
SEMA4D IN SEMAPHORIN SIGNALING	32	235616	10.4996	8	-0.118082	0.841593	100	87.5	ERBB2 (1.84 %) MET (1.84 %) RHOB (0.61 %) ROCK1 (0.61 %)	0.0112675	0.022408	0.033423	0.0443139	0.0112675	0.271873	0.288189	0.419525	0.220647	0.202783	0.10713	0.033423	0.349878	0.033423	0.334976	0.280078	0.0866641	0.0657289	0.033423	0.0550821	0.229429	0.022408	0.033423	0.0443139	0.0866641	0.0969551	0.175217	0.0969551	0.117191	0.0550821	0.0550821	0.033423	0.0866641	0.0550821	0.0550821	0.0866641	0.022408	0.229429	0.10713	0.146697
MYOGENESIS	28	176981	10.4996	8	-0.118082	0.841593	100	100	CDH4 (1.84 %) CTNNB1 (1.23 %) ABL1 (1.23 %) MAP2K6 (0.61 %)	0.0112675	0.022408	0.033423	0.0443139	0.0112675	0.271873	0.288189	0.419525	0.220647	0.202783	0.10713	0.033423	0.349878	0.033423	0.334976	0.280078	0.0866641	0.0657289	0.033423	0.0550821	0.229429	0.022408	0.033423	0.0443139	0.0866641	0.0969551	0.175217	0.0969551	0.117191	0.0550821	0.0550821	0.033423	0.0866641	0.0550821	0.0550821	0.0866641	0.022408	0.229429	0.10713	0.146697
TRANSMISSION ACROSS CHEMICAL SYNAPSES	186	1322728	21.5996	18	-0.0791741	0.847795	100	94.4444	PRKCG (2.45 %) PRKACB (1.84 %) BRAF (1.84 %) RPS6KA6 (1.23 %) MDM2 (1.23 %) PRKCB (1.23 %) HRAS (0.61 %) RAF1 (0.61 %) RPS6KA1 (0.61 %)	0.0251735	0.0497133	0.0736353	0.0969551	0.0251735	0.51026	0.534607	0.705888	0.429309	0.399453	0.225051	0.0736353	0.620476	0.0736353	0.600622	0.522589	0.18451	0.141848	0.0736353	0.119688	0.443675	0.0497133	0.0736353	0.0969551	0.18451	0.205039	0.351717	0.205039	0.244559	0.119688	0.119688	0.0736353	0.18451	0.119688	0.119688	0.18451	0.0497133	0.443675	0.225051	0.300186
NEURONAL SYSTEM	279	1844678	21.5996	18	-0.0791741	0.847795	100	94.4444	PRKCG (2.45 %) PRKACB (1.84 %) BRAF (1.84 %) RPS6KA6 (1.23 %) MDM2 (1.23 %) PRKCB (1.23 %) HRAS (0.61 %) RAF1 (0.61 %) RPS6KA1 (0.61 %)	0.0251735	0.0497133	0.0736353	0.0969551	0.0251735	0.51026	0.534607	0.705888	0.429309	0.399453	0.225051	0.0736353	0.620476	0.0736353	0.600622	0.522589	0.18451	0.141848	0.0736353	0.119688	0.443675	0.0497133	0.0736353	0.0969551	0.18451	0.205039	0.351717	0.205039	0.244559	0.119688	0.119688	0.0736353	0.18451	0.119688	0.119688	0.18451	0.0497133	0.443675	0.225051	0.300186
NEUROTRANSMITTER RECEPTOR BINDING AND DOWNSTREAM TRANSMISSION IN THE POSTSYNAPTIC CELL	137	1011826	21.5996	18	-0.0791741	0.847795	100	94.4444	PRKCG (2.45 %) PRKACB (1.84 %) BRAF (1.84 %) RPS6KA6 (1.23 %) MDM2 (1.23 %) PRKCB (1.23 %) HRAS (0.61 %) RAF1 (0.61 %) RPS6KA1 (0.61 %)	0.0251735	0.0497133	0.0736353	0.0969551	0.0251735	0.51026	0.534607	0.705888	0.429309	0.399453	0.225051	0.0736353	0.620476	0.0736353	0.600622	0.522589	0.18451	0.141848	0.0736353	0.119688	0.443675	0.0497133	0.0736353	0.0969551	0.18451	0.205039	0.351717	0.205039	0.244559	0.119688	0.119688	0.0736353	0.18451	0.119688	0.119688	0.18451	0.0497133	0.443675	0.225051	0.300186
RECEPTOR LIGAND BINDING INITIATES THE SECOND PROTEOLYTIC CLEAVAGE OF NOTCH RECEPTOR	12	138867	12.8801	10	-0.109918	0.85025	100	100	JAG2 (1.84 %) NOTCH4 (1.84 %) NOTCH3 (1.23 %) JAG1 (0.61 %) NOTCH2 (0.61 %)	0.0140645	0.0279311	0.0416027	0.0550821	0.0140645	0.327397	0.346184	0.493326	0.267736	0.246696	0.132069	0.0416027	0.416227	0.0416027	0.399453	0.336857	0.10713	0.0814747	0.0416027	0.0683719	0.278035	0.0279311	0.0416027	0.0550821	0.10713	0.119688	0.213996	0.119688	0.144276	0.0683719	0.0683719	0.0416027	0.10713	0.0683719	0.0683719	0.10713	0.0279311	0.278035	0.132069	0.179876
IL1 SIGNALING	39	219477	12.8801	10	-0.109918	0.85025	100	100	IRAK2 (1.84 %) MAP3K3 (1.84 %) IRAK1 (1.23 %) IKBKB (0.61 %) MAP2K6 (0.61 %)	0.0140645	0.0279311	0.0416027	0.0550821	0.0140645	0.327397	0.346184	0.493326	0.267736	0.246696	0.132069	0.0416027	0.416227	0.0416027	0.399453	0.336857	0.10713	0.0814747	0.0416027	0.0683719	0.278035	0.0279311	0.0416027	0.0550821	0.10713	0.119688	0.213996	0.119688	0.144276	0.0683719	0.0683719	0.0416027	0.10713	0.0683719	0.0683719	0.10713	0.0279311	0.278035	0.132069	0.179876
HEDGEHOG SIGNALING PATHWAY	56	307866	19.5303	16	-0.0865898	0.852951	100	93.75	PTCH1 (3.07 %) PRKACB (1.84 %) PTCH2 (1.23 %) GSK3B (1.23 %) STK36 (1.23 %) SMO (0.61 %) PRKX (0.61 %) PRKACA (0.61 %)	0.022408	0.0443139	0.0657289	0.0866641	0.022408	0.469832	0.493326	0.663049	0.39261	0.364446	0.202783	0.0657289	0.577341	0.0657289	0.557743	0.481712	0.165818	0.127138	0.0657289	0.10713	0.40622	0.0443139	0.0657289	0.0866641	0.165818	0.18451	0.319732	0.18451	0.220647	0.10713	0.10713	0.0657289	0.165818	0.10713	0.10713	0.165818	0.0443139	0.40622	0.202783	0.271873
LEISHMANIA INFECTION	72	554697	15.1752	12	-0.101954	0.85454	100	83.3333	JAK2 (3.07 %) PRKCB (1.23 %) JAK1 (1.23 %) IRAK1 (1.23 %) FOS (1.23 %) RELA (0.61 %)	0.0168535	0.033423	0.0497133	0.0657289	0.0168535	0.378687	0.399453	0.557743	0.31198	0.288189	0.156311	0.0497133	0.475805	0.0497133	0.457679	0.389159	0.127138	0.0969551	0.0497133	0.0814747	0.323576	0.033423	0.0497133	0.0657289	0.127138	0.141848	0.250952	0.141848	0.17053	0.0814747	0.0814747	0.0497133	0.127138	0.0814747	0.0814747	0.127138	0.033423	0.323576	0.156311	0.211766
ETS PATHWAY	18	121314	15.1752	12	-0.101954	0.85454	100	100	RBL1 (2.45 %) CSF1R (1.23 %) RBL2 (1.23 %) FOS (1.23 %) HRAS (0.61 %) ETS1 (0.61 %)	0.0168535	0.033423	0.0497133	0.0657289	0.0168535	0.378687	0.399453	0.557743	0.31198	0.288189	0.156311	0.0497133	0.475805	0.0497133	0.457679	0.389159	0.127138	0.0969551	0.0497133	0.0814747	0.323576	0.033423	0.0497133	0.0657289	0.127138	0.141848	0.250952	0.141848	0.17053	0.0814747	0.0814747	0.0497133	0.127138	0.0814747	0.0814747	0.127138	0.033423	0.323576	0.156311	0.211766
PTEN PATHWAY	18	137570	15.1752	12	-0.101954	0.85454	100	100	PTEN (2.45 %) PTK2 (1.23 %) FOXO3 (1.23 %) AKT1 (1.23 %) SHC1 (0.61 %) PIK3CA (0.61 %)	0.0168535	0.033423	0.0497133	0.0657289	0.0168535	0.378687	0.399453	0.557743	0.31198	0.288189	0.156311	0.0497133	0.475805	0.0497133	0.457679	0.389159	0.127138	0.0969551	0.0497133	0.0814747	0.323576	0.033423	0.0497133	0.0657289	0.127138	0.141848	0.250952	0.141848	0.17053	0.0814747	0.0814747	0.0497133	0.127138	0.0814747	0.0814747	0.127138	0.033423	0.323576	0.156311	0.211766
SIGNALING BY NOTCH1	70	467072	15.1752	12	-0.101954	0.85454	100	100	JAG2 (1.84 %) MAML1 (1.84 %) MYC (1.23 %) FBXW7 (1.23 %) JAG1 (0.61 %) MAML2 (0.61 %)	0.0168535	0.033423	0.0497133	0.0657289	0.0168535	0.378687	0.399453	0.557743	0.31198	0.288189	0.156311	0.0497133	0.475805	0.0497133	0.457679	0.389159	0.127138	0.0969551	0.0497133	0.0814747	0.323576	0.033423	0.0497133	0.0657289	0.127138	0.141848	0.250952	0.141848	0.17053	0.0814747	0.0814747	0.0497133	0.127138	0.0814747	0.0814747	0.127138	0.033423	0.323576	0.156311	0.211766
VEGFR1 PATHWAY	26	212681	17.3904	14	-0.0941803	0.855283	100	100	FLT1 (2.45 %) PTPN11 (1.84 %) AKT1 (1.23 %) PRKCB (1.23 %) PIK3CA (0.61 %) PLCG1 (0.61 %) PRKACA (0.61 %)	0.0196347	0.0388839	0.0577551	0.0762558	0.0196347	0.426066	0.448383	0.61397	0.353551	0.327397	0.179876	0.0577551	0.529303	0.0577551	0.51026	0.437335	0.146697	0.112175	0.0577551	0.0943933	0.366244	0.0388839	0.0577551	0.0762558	0.146697	0.163451	0.28617	0.163451	0.195979	0.0943933	0.0943933	0.0577551	0.146697	0.0943933	0.0943933	0.146697	0.0388839	0.366244	0.179876	0.242416
PIP3 ACTIVATES AKT SIGNALING	29	205706	17.3904	14	-0.0941803	0.855283	100	85.7143	PTEN (2.45 %) TSC2 (1.84 %) AKT1 (1.23 %) FOXO3 (1.23 %) MDM2 (1.23 %) AKT3 (0.61 %) GSK3A (0.61 %)	0.0196347	0.0388839	0.0577551	0.0762558	0.0196347	0.426066	0.448383	0.61397	0.353551	0.327397	0.179876	0.0577551	0.529303	0.0577551	0.51026	0.437335	0.146697	0.112175	0.0577551	0.0943933	0.366244	0.0388839	0.0577551	0.0762558	0.146697	0.163451	0.28617	0.163451	0.195979	0.0943933	0.0943933	0.0577551	0.146697	0.0943933	0.0943933	0.146697	0.0388839	0.366244	0.179876	0.242416
EPHA FWDPATHWAY	34	189882	37.6251	33	-0.0569635	0.858564	100	66.6667	EPHA3 (6.13 %) EPHA5 (4.29 %) EPHA7 (3.68 %) PIK3CG (3.07 %) HCK (1.84 %) FYN (1.84 %) VAV2 (1.23 %) VAV3 (1.23 %) YES1 (1.23 %) PLCG1 (0.61 %) ROCK1 (0.61 %) EPHA1 (0.61 %) SRC (0.61 %) EPHA2 (0.61 %) LCK (0.61 %) CDK5 (0.61 %) EPHA6 (0.61 %) EPHA4 (0.61 %)	0.0497133	0.0969551	0.141848	0.18451	0.0497133	0.760155	0.783409	0.913498	0.674311	0.639344	0.399453	0.141848	0.855962	0.141848	0.840497	0.772078	0.334976	0.263576	0.141848	0.225051	0.690502	0.0969551	0.141848	0.18451	0.334976	0.368036	0.579729	0.368036	0.429309	0.225051	0.225051	0.141848	0.334976	0.225051	0.225051	0.334976	0.0969551	0.690502	0.399453	0.51026
INSULIN RECEPTOR PATHWAY IN CARDIAC MYOCYTES	51	357214	27.4229	23	-0.0763857	0.872795	100	78.2609	CDKN2A (5.52 %) PTEN (2.45 %) IRS1 (1.84 %) GSK3B (1.23 %) AKT1 (1.23 %) PIK3CD (1.23 %) PIK3CA (0.61 %) RPS6KA1 (0.61 %) AKT3 (0.61 %) GSK3A (0.61 %) SHC1 (0.61 %) RAF1 (0.61 %)	0.033423	0.0657289	0.0969551	0.127138	0.033423	0.61397	0.639344	0.804409	0.526629	0.493326	0.288189	0.0969551	0.72522	0.0969551	0.705888	0.626873	0.238111	0.18451	0.0969551	0.156311	0.54245	0.0657289	0.0969551	0.127138	0.238111	0.263576	0.438927	0.263576	0.31198	0.156311	0.156311	0.0969551	0.238111	0.156311	0.156311	0.238111	0.0657289	0.54245	0.288189	0.378687
INTEGRIN SIGNALING PATHWAY	82	659913	46.3281	41	-0.0530606	0.876962	100	80.4878	CDKN2A (5.52 %) PAK3 (3.07 %) PAK7 (2.45 %) PTEN (2.45 %) FYN (1.84 %) PAK4 (1.84 %) BRAF (1.84 %) PAK6 (1.23 %) ABL1 (1.23 %) PTK2 (1.23 %) PLCG2 (1.23 %) AKT1 (1.23 %) GRB7 (1.23 %) MRAS (0.61 %) ROCK1 (0.61 %) PIK3CA (0.61 %) TNK2 (0.61 %) SRC (0.61 %) MAPK8 (0.61 %) RALA (0.61 %) AKT3 (0.61 %) PLCG1 (0.61 %) SHC1 (0.61 %) RAF1 (0.61 %)	0.0657289	0.127138	0.18451	0.238111	0.0657289	0.850981	0.869927	0.961744	0.77592	0.743281	0.493326	0.18451	0.924496	0.18451	0.913498	0.860776	0.419525	0.334976	0.18451	0.288189	0.790648	0.127138	0.18451	0.238111	0.419525	0.457679	0.685197	0.457679	0.526629	0.288189	0.288189	0.18451	0.419525	0.288189	0.288189	0.419525	0.127138	0.790648	0.493326	0.61397
INOSITOL PHOSPHATE METABOLISM	54	380988	25.5423	21	-0.0850407	0.884664	100	85.7143	PIK3C3 (3.07 %) PIK3CG (3.07 %) PIK3C2G (2.45 %) PTEN (2.45 %) PIK3C2A (1.23 %) PIK3CD (1.23 %) PLCG2 (1.23 %) PIK3C2B (0.61 %) PIK3CA (0.61 %) PLCG1 (0.61 %) PI4KA (0.61 %)	0.030681	0.0604206	0.0892478	0.117191	0.030681	0.582103	0.607353	0.77592	0.496188	0.46379	0.267736	0.0892478	0.69399	0.0892478	0.674311	0.594925	0.220647	0.17053	0.0892478	0.144276	0.511646	0.0604206	0.0892478	0.117191	0.220647	0.244559	0.411245	0.244559	0.290203	0.144276	0.144276	0.0892478	0.220647	0.144276	0.144276	0.220647	0.0604206	0.511646	0.267736	0.353551
PHOSPHOLIPID METABOLISM	198	1175702	25.5423	21	-0.0850407	0.884664	100	85.7143	PIK3C3 (3.07 %) PIK3CG (3.07 %) PIK3C2G (2.45 %) PTEN (2.45 %) PIK3C2A (1.23 %) PIK3CD (1.23 %) PIK3R2 (1.23 %) PIK3C2B (0.61 %) PIK3CA (0.61 %) PI4KA (0.61 %) PRKD1 (0.61 %)	0.030681	0.0604206	0.0892478	0.117191	0.030681	0.582103	0.607353	0.77592	0.496188	0.46379	0.267736	0.0892478	0.69399	0.0892478	0.674311	0.594925	0.220647	0.17053	0.0892478	0.144276	0.511646	0.0604206	0.0892478	0.117191	0.220647	0.244559	0.411245	0.244559	0.290203	0.144276	0.144276	0.0892478	0.220647	0.144276	0.144276	0.220647	0.0604206	0.511646	0.267736	0.353551
IL6 PATHWAY	22	117171	23.6024	19	-0.094202	0.894309	100	89.4737	JAK2 (3.07 %) PTPN11 (1.84 %) JAK3 (1.84 %) TYK2 (1.23 %) JAK1 (1.23 %) FOS (1.23 %) HRAS (0.61 %) STAT3 (0.61 %) RAF1 (0.61 %) SHC1 (0.61 %)	0.0279311	0.0550821	0.0814747	0.10713	0.0279311	0.547606	0.572525	0.743281	0.46379	0.432533	0.246696	0.0814747	0.659209	0.0814747	0.639344	0.560242	0.202783	0.156311	0.0814747	0.132069	0.478767	0.0550821	0.0814747	0.10713	0.202783	0.225051	0.382197	0.225051	0.267736	0.132069	0.132069	0.0814747	0.202783	0.132069	0.132069	0.202783	0.0550821	0.478767	0.246696	0.327397
PIP3 SIGNALING IN B LYMPHOCYTES	36	302063	23.6024	19	-0.094202	0.894309	100	73.6842	CDKN2A (5.52 %) PTEN (2.45 %) VAV1 (1.23 %) AKT1 (1.23 %) FOXO3 (1.23 %) PLCG2 (1.23 %) AKT3 (0.61 %) PIK3CA (0.61 %) RPS6KA1 (0.61 %) SYK (0.61 %)	0.0279311	0.0550821	0.0814747	0.10713	0.0279311	0.547606	0.572525	0.743281	0.46379	0.432533	0.246696	0.0814747	0.659209	0.0814747	0.639344	0.560242	0.202783	0.156311	0.0814747	0.132069	0.478767	0.0550821	0.0814747	0.10713	0.202783	0.225051	0.382197	0.225051	0.267736	0.132069	0.132069	0.0814747	0.202783	0.132069	0.132069	0.202783	0.0550821	0.478767	0.246696	0.327397
MYC REPRESS PATHWAY	63	416109	23.6024	19	-0.094202	0.894309	100	84.2105	RBL1 (2.45 %) ERBB2 (1.84 %) TSC2 (1.84 %) PDGFRB (1.84 %) MYC (1.23 %) SMAD4 (1.23 %) FOXO3 (1.23 %) SMAD2 (0.61 %) CDKN2B (0.61 %) BRCA1 (0.61 %)	0.0279311	0.0550821	0.0814747	0.10713	0.0279311	0.547606	0.572525	0.743281	0.46379	0.432533	0.246696	0.0814747	0.659209	0.0814747	0.639344	0.560242	0.202783	0.156311	0.0814747	0.132069	0.478767	0.0550821	0.0814747	0.10713	0.202783	0.225051	0.382197	0.225051	0.267736	0.132069	0.132069	0.0814747	0.202783	0.132069	0.132069	0.202783	0.0550821	0.478767	0.246696	0.327397
IL22BP PATHWAY	16	86575	21.5996	17	-0.103998	0.90194	100	88.2353	JAK2 (3.07 %) JAK3 (1.84 %) TYK2 (1.23 %) JAK1 (1.23 %) STAT5B (1.23 %) STAT3 (0.61 %) STAT2 (0.61 %) STAT5A (0.61 %) STAT6 (0.61 %)	0.0251735	0.0497133	0.0736353	0.0969551	0.0251735	0.51026	0.534607	0.705888	0.429309	0.399453	0.225051	0.0736353	0.620476	0.0736353	0.600622	0.522589	0.18451	0.141848	0.0736353	0.119688	0.443675	0.0497133	0.0736353	0.0969551	0.18451	0.205039	0.351717	0.205039	0.244559	0.119688	0.119688	0.0736353	0.18451	0.119688	0.119688	0.18451	0.0497133	0.443675	0.225051	0.300186
IL7 PATHWAY	17	125165	19.5303	15	-0.114619	0.90773	100	86.6667	PIK3CG (3.07 %) JAK3 (1.84 %) FYN (1.84 %) JAK1 (1.23 %) STAT5B (1.23 %) PIK3CA (0.61 %) STAT5A (0.61 %) LCK (0.61 %)	0.022408	0.0443139	0.0657289	0.0866641	0.022408	0.469832	0.493326	0.663049	0.39261	0.364446	0.202783	0.0657289	0.577341	0.0657289	0.557743	0.481712	0.165818	0.127138	0.0657289	0.10713	0.40622	0.0443139	0.0657289	0.0866641	0.165818	0.18451	0.319732	0.18451	0.220647	0.10713	0.10713	0.0657289	0.165818	0.10713	0.10713	0.165818	0.0443139	0.40622	0.202783	0.271873
GPCR PATHWAY	37	219916	19.5303	15	-0.114619	0.90773	100	80	GNAS (4.29 %) PRKACB (1.84 %) PRKCB (1.23 %) FOS (1.23 %) HRAS (0.61 %) RAF1 (0.61 %) PLCG1 (0.61 %) PRKAR1A (0.61 %)	0.022408	0.0443139	0.0657289	0.0866641	0.022408	0.469832	0.493326	0.663049	0.39261	0.364446	0.202783	0.0657289	0.577341	0.0657289	0.557743	0.481712	0.165818	0.127138	0.0657289	0.10713	0.40622	0.0443139	0.0657289	0.0866641	0.165818	0.18451	0.319732	0.18451	0.220647	0.10713	0.10713	0.0657289	0.165818	0.10713	0.10713	0.165818	0.0443139	0.40622	0.202783	0.271873
CREB PATHWAY	27	222441	19.5303	15	-0.114619	0.90773	100	80	GNAS (4.29 %) PRKACB (1.84 %) PRKCB (1.23 %) AKT1 (1.23 %) HRAS (0.61 %) PIK3CA (0.61 %) PRKAR1A (0.61 %) RPS6KA1 (0.61 %)	0.022408	0.0443139	0.0657289	0.0866641	0.022408	0.469832	0.493326	0.663049	0.39261	0.364446	0.202783	0.0657289	0.577341	0.0657289	0.557743	0.481712	0.165818	0.127138	0.0657289	0.10713	0.40622	0.0443139	0.0657289	0.0866641	0.165818	0.18451	0.319732	0.18451	0.220647	0.10713	0.10713	0.0657289	0.165818	0.10713	0.10713	0.165818	0.0443139	0.40622	0.202783	0.271873
IFNG PATHWAY	40	282300	19.5303	15	-0.114619	0.90773	100	86.6667	JAK2 (3.07 %) PTPN11 (1.84 %) JAK1 (1.23 %) AKT1 (1.23 %) PIK3CA (0.61 %) STAT3 (0.61 %) RAPGEF1 (0.61 %) PRKCD (0.61 %)	0.022408	0.0443139	0.0657289	0.0866641	0.022408	0.469832	0.493326	0.663049	0.39261	0.364446	0.202783	0.0657289	0.577341	0.0657289	0.557743	0.481712	0.165818	0.127138	0.0657289	0.10713	0.40622	0.0443139	0.0657289	0.0866641	0.165818	0.18451	0.319732	0.18451	0.220647	0.10713	0.10713	0.0657289	0.165818	0.10713	0.10713	0.165818	0.0443139	0.40622	0.202783	0.271873
SYNTHESIS OF PIPS AT THE PLASMA MEMBRANE	31	217049	19.5303	15	-0.114619	0.90773	100	80	PIK3CG (3.07 %) PIK3C2G (2.45 %) PTEN (2.45 %) PIK3C2A (1.23 %) PIK3CD (1.23 %) PIK3R2 (1.23 %) PIK3C2B (0.61 %) PIK3CA (0.61 %)	0.022408	0.0443139	0.0657289	0.0866641	0.022408	0.469832	0.493326	0.663049	0.39261	0.364446	0.202783	0.0657289	0.577341	0.0657289	0.557743	0.481712	0.165818	0.127138	0.0657289	0.10713	0.40622	0.0443139	0.0657289	0.0866641	0.165818	0.18451	0.319732	0.18451	0.220647	0.10713	0.10713	0.0657289	0.165818	0.10713	0.10713	0.165818	0.0443139	0.40622	0.202783	0.271873
IL RECEPTOR SHC SIGNALING	27	136011	19.5303	15	-0.114619	0.90773	100	80	JAK2 (3.07 %) JAK3 (1.84 %) JAK1 (1.23 %) PIK3CD (1.23 %) PIK3R2 (1.23 %) HRAS (0.61 %) PIK3CA (0.61 %) SHC1 (0.61 %)	0.022408	0.0443139	0.0657289	0.0866641	0.022408	0.469832	0.493326	0.663049	0.39261	0.364446	0.202783	0.0657289	0.577341	0.0657289	0.557743	0.481712	0.165818	0.127138	0.0657289	0.10713	0.40622	0.0443139	0.0657289	0.0866641	0.165818	0.18451	0.319732	0.18451	0.220647	0.10713	0.10713	0.0657289	0.165818	0.10713	0.10713	0.165818	0.0443139	0.40622	0.202783	0.271873
HDAC PATHWAY	32	188182	17.3904	13	-0.126365	0.911819	100	84.6154	PIK3CG (3.07 %) INSR (1.84 %) IGF1R (1.23 %) AKT1 (1.23 %) MAP2K6 (0.61 %) PIK3CA (0.61 %) MAPK7 (0.61 %)	0.0196347	0.0388839	0.0577551	0.0762558	0.0196347	0.426066	0.448383	0.61397	0.353551	0.327397	0.179876	0.0577551	0.529303	0.0577551	0.51026	0.437335	0.146697	0.112175	0.0577551	0.0943933	0.366244	0.0388839	0.0577551	0.0762558	0.146697	0.163451	0.28617	0.163451	0.195979	0.0943933	0.0943933	0.0577551	0.146697	0.0943933	0.0943933	0.146697	0.0388839	0.366244	0.179876	0.242416
LONGEVITY PATHWAY	15	107068	17.3904	13	-0.126365	0.911819	100	92.3077	PIK3CG (3.07 %) FOXO3 (1.23 %) AKT1 (1.23 %) IGF1R (1.23 %) HRAS (0.61 %) SHC1 (0.61 %) PIK3CA (0.61 %)	0.0196347	0.0388839	0.0577551	0.0762558	0.0196347	0.426066	0.448383	0.61397	0.353551	0.327397	0.179876	0.0577551	0.529303	0.0577551	0.51026	0.437335	0.146697	0.112175	0.0577551	0.0943933	0.366244	0.0388839	0.0577551	0.0762558	0.146697	0.163451	0.28617	0.163451	0.195979	0.0943933	0.0943933	0.0577551	0.146697	0.0943933	0.0943933	0.146697	0.0388839	0.366244	0.179876	0.242416
TRKA PATHWAY	12	87755	17.3904	13	-0.126365	0.911819	100	84.6154	NTRK1 (4.29 %) PRKCB (1.23 %) AKT1 (1.23 %) PIK3CA (0.61 %) HRAS (0.61 %) PLCG1 (0.61 %) SHC1 (0.61 %)	0.0196347	0.0388839	0.0577551	0.0762558	0.0196347	0.426066	0.448383	0.61397	0.353551	0.327397	0.179876	0.0577551	0.529303	0.0577551	0.51026	0.437335	0.146697	0.112175	0.0577551	0.0943933	0.366244	0.0388839	0.0577551	0.0762558	0.146697	0.163451	0.28617	0.163451	0.195979	0.0943933	0.0943933	0.0577551	0.146697	0.0943933	0.0943933	0.146697	0.0388839	0.366244	0.179876	0.242416
PTEN PATHWAY	17	137706	17.3904	13	-0.126365	0.911819	100	100	PTEN (2.45 %) RBL2 (1.23 %) AKT1 (1.23 %) PIK3CD (1.23 %) PIK3CA (0.61 %) AKT3 (0.61 %) SHC1 (0.61 %)	0.0196347	0.0388839	0.0577551	0.0762558	0.0196347	0.426066	0.448383	0.61397	0.353551	0.327397	0.179876	0.0577551	0.529303	0.0577551	0.51026	0.437335	0.146697	0.112175	0.0577551	0.0943933	0.366244	0.0388839	0.0577551	0.0762558	0.146697	0.163451	0.28617	0.163451	0.195979	0.0943933	0.0943933	0.0577551	0.146697	0.0943933	0.0943933	0.146697	0.0388839	0.366244	0.179876	0.242416
TRKA RECEPTOR	17	99221	17.3904	13	-0.126365	0.911819	100	84.6154	NTRK1 (4.29 %) AKT1 (1.23 %) PIK3CD (1.23 %) HRAS (0.61 %) PIK3CA (0.61 %) AKT3 (0.61 %) SHC1 (0.61 %)	0.0196347	0.0388839	0.0577551	0.0762558	0.0196347	0.426066	0.448383	0.61397	0.353551	0.327397	0.179876	0.0577551	0.529303	0.0577551	0.51026	0.437335	0.146697	0.112175	0.0577551	0.0943933	0.366244	0.0388839	0.0577551	0.0762558	0.146697	0.163451	0.28617	0.163451	0.195979	0.0943933	0.0943933	0.0577551	0.146697	0.0943933	0.0943933	0.146697	0.0388839	0.366244	0.179876	0.242416
HEDGEHOG GLI PATHWAY	48	378754	17.3904	13	-0.126365	0.911819	100	92.3077	PTCH1 (3.07 %) STK36 (1.23 %) GSK3B (1.23 %) AKT1 (1.23 %) SMO (0.61 %) PRKCD (0.61 %) PRKACA (0.61 %)	0.0196347	0.0388839	0.0577551	0.0762558	0.0196347	0.426066	0.448383	0.61397	0.353551	0.327397	0.179876	0.0577551	0.529303	0.0577551	0.51026	0.437335	0.146697	0.112175	0.0577551	0.0943933	0.366244	0.0388839	0.0577551	0.0762558	0.146697	0.163451	0.28617	0.163451	0.195979	0.0943933	0.0943933	0.0577551	0.146697	0.0943933	0.0943933	0.146697	0.0388839	0.366244	0.179876	0.242416
DAG AND IP3 SIGNALING	32	246215	17.3904	13	-0.126365	0.911819	100	92.3077	PRKCG (2.45 %) PRKACB (1.84 %) PRKCE (1.84 %) PLCG1 (0.61 %) PRKACA (0.61 %) PRKAR1A (0.61 %) PRKCD (0.61 %)	0.0196347	0.0388839	0.0577551	0.0762558	0.0196347	0.426066	0.448383	0.61397	0.353551	0.327397	0.179876	0.0577551	0.529303	0.0577551	0.51026	0.437335	0.146697	0.112175	0.0577551	0.0943933	0.366244	0.0388839	0.0577551	0.0762558	0.146697	0.163451	0.28617	0.163451	0.195979	0.0943933	0.0943933	0.0577551	0.146697	0.0943933	0.0943933	0.146697	0.0388839	0.366244	0.179876	0.242416
SEMAPHORIN INTERACTIONS	68	502695	17.3904	13	-0.126365	0.911819	100	92.3077	ERBB2 (1.84 %) FYN (1.84 %) MET (1.84 %) FES (1.23 %) CDK5 (0.61 %) RHOB (0.61 %) ROCK1 (0.61 %)	0.0196347	0.0388839	0.0577551	0.0762558	0.0196347	0.426066	0.448383	0.61397	0.353551	0.327397	0.179876	0.0577551	0.529303	0.0577551	0.51026	0.437335	0.146697	0.112175	0.0577551	0.0943933	0.366244	0.0388839	0.0577551	0.0762558	0.146697	0.163451	0.28617	0.163451	0.195979	0.0943933	0.0943933	0.0577551	0.146697	0.0943933	0.0943933	0.146697	0.0388839	0.366244	0.179876	0.242416
INTERFERON SIGNALING	159	1028037	17.3904	13	-0.126365	0.911819	100	84.6154	JAK2 (3.07 %) EIF4G1 (1.23 %) JAK1 (1.23 %) TYK2 (1.23 %) PLCG1 (0.61 %) PRKCD (0.61 %) STAT2 (0.61 %)	0.0196347	0.0388839	0.0577551	0.0762558	0.0196347	0.426066	0.448383	0.61397	0.353551	0.327397	0.179876	0.0577551	0.529303	0.0577551	0.51026	0.437335	0.146697	0.112175	0.0577551	0.0943933	0.366244	0.0388839	0.0577551	0.0762558	0.146697	0.163451	0.28617	0.163451	0.195979	0.0943933	0.0943933	0.0577551	0.146697	0.0943933	0.0943933	0.146697	0.0388839	0.366244	0.179876	0.242416
IL4 PATHWAY	11	67760	15.1752	11	-0.139742	0.914326	100	81.8182	IRS1 (1.84 %) JAK3 (1.84 %) JAK1 (1.23 %) AKT1 (1.23 %) SHC1 (0.61 %) STAT6 (0.61 %)	0.0168535	0.033423	0.0497133	0.0657289	0.0168535	0.378687	0.399453	0.557743	0.31198	0.288189	0.156311	0.0497133	0.475805	0.0497133	0.457679	0.389159	0.127138	0.0969551	0.0497133	0.0814747	0.323576	0.033423	0.0497133	0.0657289	0.127138	0.141848	0.250952	0.141848	0.17053	0.0814747	0.0814747	0.0497133	0.127138	0.0814747	0.0814747	0.127138	0.033423	0.323576	0.156311	0.211766
IL27 PATHWAY	26	111391	15.1752	11	-0.139742	0.914326	100	81.8182	JAK2 (3.07 %) TYK2 (1.23 %) JAK1 (1.23 %) STAT3 (0.61 %) STAT5A (0.61 %) STAT2 (0.61 %)	0.0168535	0.033423	0.0497133	0.0657289	0.0168535	0.378687	0.399453	0.557743	0.31198	0.288189	0.156311	0.0497133	0.475805	0.0497133	0.457679	0.389159	0.127138	0.0969551	0.0497133	0.0814747	0.323576	0.033423	0.0497133	0.0657289	0.127138	0.141848	0.250952	0.141848	0.17053	0.0814747	0.0814747	0.0497133	0.127138	0.0814747	0.0814747	0.127138	0.033423	0.323576	0.156311	0.211766
ALK1 PATHWAY	26	168489	15.1752	11	-0.139742	0.914326	100	81.8182	INHBA (3.07 %) SMAD4 (1.23 %) ACVRL1 (1.23 %) ACVR2B (0.61 %) TGFBR1 (0.61 %) TGFBR2 (0.61 %)	0.0168535	0.033423	0.0497133	0.0657289	0.0168535	0.378687	0.399453	0.557743	0.31198	0.288189	0.156311	0.0497133	0.475805	0.0497133	0.457679	0.389159	0.127138	0.0969551	0.0497133	0.0814747	0.323576	0.033423	0.0497133	0.0657289	0.127138	0.141848	0.250952	0.141848	0.17053	0.0814747	0.0814747	0.0497133	0.127138	0.0814747	0.0814747	0.127138	0.033423	0.323576	0.156311	0.211766
LYMPH ANGIOGENESIS PATHWAY	25	199157	15.1752	11	-0.139742	0.914326	100	90.9091	FLT4 (2.45 %) VEGFC (1.23 %) AKT1 (1.23 %) SHC1 (0.61 %) PIK3CA (0.61 %) RPS6KA1 (0.61 %)	0.0168535	0.033423	0.0497133	0.0657289	0.0168535	0.378687	0.399453	0.557743	0.31198	0.288189	0.156311	0.0497133	0.475805	0.0497133	0.457679	0.389159	0.127138	0.0969551	0.0497133	0.0814747	0.323576	0.033423	0.0497133	0.0657289	0.127138	0.141848	0.250952	0.141848	0.17053	0.0814747	0.0814747	0.0497133	0.127138	0.0814747	0.0814747	0.127138	0.033423	0.323576	0.156311	0.211766
ACTIVATION OF NMDA RECEPTOR UPON GLUTAMATE BINDING AND POSTSYNAPTIC EVENTS	37	326879	15.1752	11	-0.139742	0.914326	100	100	PRKACB (1.84 %) BRAF (1.84 %) RPS6KA6 (1.23 %) HRAS (0.61 %) RAF1 (0.61 %) RPS6KA1 (0.61 %)	0.0168535	0.033423	0.0497133	0.0657289	0.0168535	0.378687	0.399453	0.557743	0.31198	0.288189	0.156311	0.0497133	0.475805	0.0497133	0.457679	0.389159	0.127138	0.0969551	0.0497133	0.0814747	0.323576	0.033423	0.0497133	0.0657289	0.127138	0.141848	0.250952	0.141848	0.17053	0.0814747	0.0814747	0.0497133	0.127138	0.0814747	0.0814747	0.127138	0.033423	0.323576	0.156311	0.211766
POST NMDA RECEPTOR ACTIVATION EVENTS	33	293735	15.1752	11	-0.139742	0.914326	100	100	PRKACB (1.84 %) BRAF (1.84 %) RPS6KA6 (1.23 %) HRAS (0.61 %) RAF1 (0.61 %) RPS6KA1 (0.61 %)	0.0168535	0.033423	0.0497133	0.0657289	0.0168535	0.378687	0.399453	0.557743	0.31198	0.288189	0.156311	0.0497133	0.475805	0.0497133	0.457679	0.389159	0.127138	0.0969551	0.0497133	0.0814747	0.323576	0.033423	0.0497133	0.0657289	0.127138	0.141848	0.250952	0.141848	0.17053	0.0814747	0.0814747	0.0497133	0.127138	0.0814747	0.0814747	0.127138	0.033423	0.323576	0.156311	0.211766
PRIMARY IMMUNODEFICIENCY	35	220355	8.02798	5	-0.205636	0.914934	100	100	JAK3 (1.84 %) ZAP70 (0.61 %) LCK (0.61 %)	0.00846257	0.0168535	0.0251735	0.033423	0.00846257	0.211766	0.225051	0.334976	0.17053	0.156311	0.0814747	0.0251735	0.275987	0.0251735	0.263576	0.218437	0.0657289	0.0497133	0.0251735	0.0416027	0.17755	0.0168535	0.0251735	0.033423	0.0657289	0.0736353	0.134524	0.0736353	0.0892478	0.0416027	0.0416027	0.0251735	0.0657289	0.0416027	0.0416027	0.0657289	0.0168535	0.17755	0.0814747	0.112175
ARRHYTHMOGENIC RIGHT VENTRICULAR CARDIOMYOPATHY ARVC	76	551115	8.02798	5	-0.205636	0.914934	100	100	JUP (1.23 %) CTNNB1 (1.23 %) CACNA2D2 (0.61 %)	0.00846257	0.0168535	0.0251735	0.033423	0.00846257	0.211766	0.225051	0.334976	0.17053	0.156311	0.0814747	0.0251735	0.275987	0.0251735	0.263576	0.218437	0.0657289	0.0497133	0.0251735	0.0416027	0.17755	0.0168535	0.0251735	0.033423	0.0657289	0.0736353	0.134524	0.0736353	0.0892478	0.0416027	0.0416027	0.0251735	0.0657289	0.0416027	0.0416027	0.0657289	0.0168535	0.17755	0.0814747	0.112175
SRCRPTP PATHWAY	11	59379	8.02798	5	-0.205636	0.914934	100	100	PRKCB (1.23 %) CDC25A (1.23 %) SRC (0.61 %)	0.00846257	0.0168535	0.0251735	0.033423	0.00846257	0.211766	0.225051	0.334976	0.17053	0.156311	0.0814747	0.0251735	0.275987	0.0251735	0.263576	0.218437	0.0657289	0.0497133	0.0251735	0.0416027	0.17755	0.0168535	0.0251735	0.033423	0.0657289	0.0736353	0.134524	0.0736353	0.0892478	0.0416027	0.0416027	0.0251735	0.0657289	0.0416027	0.0416027	0.0657289	0.0168535	0.17755	0.0814747	0.112175
CELL2CELL PATHWAY	14	112873	8.02798	5	-0.205636	0.914934	100	100	PTK2 (1.23 %) CTNNB1 (1.23 %) SRC (0.61 %)	0.00846257	0.0168535	0.0251735	0.033423	0.00846257	0.211766	0.225051	0.334976	0.17053	0.156311	0.0814747	0.0251735	0.275987	0.0251735	0.263576	0.218437	0.0657289	0.0497133	0.0251735	0.0416027	0.17755	0.0168535	0.0251735	0.033423	0.0657289	0.0736353	0.134524	0.0736353	0.0892478	0.0416027	0.0416027	0.0251735	0.0657289	0.0416027	0.0416027	0.0657289	0.0168535	0.17755	0.0814747	0.112175
GATA3 PATHWAY	16	75951	8.02798	5	-0.205636	0.914934	100	100	PRKACB (1.84 %) JUNB (0.61 %) PRKAR1A (0.61 %)	0.00846257	0.0168535	0.0251735	0.033423	0.00846257	0.211766	0.225051	0.334976	0.17053	0.156311	0.0814747	0.0251735	0.275987	0.0251735	0.263576	0.218437	0.0657289	0.0497133	0.0251735	0.0416027	0.17755	0.0168535	0.0251735	0.033423	0.0657289	0.0736353	0.134524	0.0736353	0.0892478	0.0416027	0.0416027	0.0251735	0.0657289	0.0416027	0.0416027	0.0657289	0.0168535	0.17755	0.0814747	0.112175
TCRA PATHWAY	13	67977	8.02798	5	-0.205636	0.914934	100	100	FYN (1.84 %) ZAP70 (0.61 %) LCK (0.61 %)	0.00846257	0.0168535	0.0251735	0.033423	0.00846257	0.211766	0.225051	0.334976	0.17053	0.156311	0.0814747	0.0251735	0.275987	0.0251735	0.263576	0.218437	0.0657289	0.0497133	0.0251735	0.0416027	0.17755	0.0168535	0.0251735	0.033423	0.0657289	0.0736353	0.134524	0.0736353	0.0892478	0.0416027	0.0416027	0.0251735	0.0657289	0.0416027	0.0416027	0.0657289	0.0168535	0.17755	0.0814747	0.112175
CK1 PATHWAY	17	98218	8.02798	5	-0.205636	0.914934	100	100	PRKACB (1.84 %) CDK5 (0.61 %) PRKAR1A (0.61 %)	0.00846257	0.0168535	0.0251735	0.033423	0.00846257	0.211766	0.225051	0.334976	0.17053	0.156311	0.0814747	0.0251735	0.275987	0.0251735	0.263576	0.218437	0.0657289	0.0497133	0.0251735	0.0416027	0.17755	0.0168535	0.0251735	0.033423	0.0657289	0.0736353	0.134524	0.0736353	0.0892478	0.0416027	0.0416027	0.0251735	0.0657289	0.0416027	0.0416027	0.0657289	0.0168535	0.17755	0.0814747	0.112175
G ALPHA S PATHWAY	16	139105	8.02798	5	-0.205636	0.914934	100	100	BRAF (1.84 %) RAF1 (0.61 %) SRC (0.61 %)	0.00846257	0.0168535	0.0251735	0.033423	0.00846257	0.211766	0.225051	0.334976	0.17053	0.156311	0.0814747	0.0251735	0.275987	0.0251735	0.263576	0.218437	0.0657289	0.0497133	0.0251735	0.0416027	0.17755	0.0168535	0.0251735	0.033423	0.0657289	0.0736353	0.134524	0.0736353	0.0892478	0.0416027	0.0416027	0.0251735	0.0657289	0.0416027	0.0416027	0.0657289	0.0168535	0.17755	0.0814747	0.112175
TYPE I INTERFERON PATHWAY	9	44613	8.02798	5	-0.205636	0.914934	100	80	TYK2 (1.23 %) JAK1 (1.23 %) STAT2 (0.61 %)	0.00846257	0.0168535	0.0251735	0.033423	0.00846257	0.211766	0.225051	0.334976	0.17053	0.156311	0.0814747	0.0251735	0.275987	0.0251735	0.263576	0.218437	0.0657289	0.0497133	0.0251735	0.0416027	0.17755	0.0168535	0.0251735	0.033423	0.0657289	0.0736353	0.134524	0.0736353	0.0892478	0.0416027	0.0416027	0.0251735	0.0657289	0.0416027	0.0416027	0.0657289	0.0168535	0.17755	0.0814747	0.112175
SYNDECAN 1 PATHWAY	46	366969	8.02798	5	-0.205636	0.914934	100	100	MET (1.84 %) PRKACA (0.61 %) CASK (0.61 %)	0.00846257	0.0168535	0.0251735	0.033423	0.00846257	0.211766	0.225051	0.334976	0.17053	0.156311	0.0814747	0.0251735	0.275987	0.0251735	0.263576	0.218437	0.0657289	0.0497133	0.0251735	0.0416027	0.17755	0.0168535	0.0251735	0.033423	0.0657289	0.0736353	0.134524	0.0736353	0.0892478	0.0416027	0.0416027	0.0251735	0.0657289	0.0416027	0.0416027	0.0657289	0.0168535	0.17755	0.0814747	0.112175
S1P S1P2 PATHWAY	24	155625	8.02798	5	-0.205636	0.914934	100	80	IRS1 (1.84 %) FOS (1.23 %) MAPK8 (0.61 %)	0.00846257	0.0168535	0.0251735	0.033423	0.00846257	0.211766	0.225051	0.334976	0.17053	0.156311	0.0814747	0.0251735	0.275987	0.0251735	0.263576	0.218437	0.0657289	0.0497133	0.0251735	0.0416027	0.17755	0.0168535	0.0251735	0.033423	0.0657289	0.0736353	0.134524	0.0736353	0.0892478	0.0416027	0.0416027	0.0251735	0.0657289	0.0416027	0.0416027	0.0657289	0.0168535	0.17755	0.0814747	0.112175
ANTIVIRAL MECHANISM BY IFN STIMULATED GENES	66	458022	8.02798	5	-0.205636	0.914934	100	80	EIF4G1 (1.23 %) JAK1 (1.23 %) PLCG1 (0.61 %)	0.00846257	0.0168535	0.0251735	0.033423	0.00846257	0.211766	0.225051	0.334976	0.17053	0.156311	0.0814747	0.0251735	0.275987	0.0251735	0.263576	0.218437	0.0657289	0.0497133	0.0251735	0.0416027	0.17755	0.0168535	0.0251735	0.033423	0.0657289	0.0736353	0.134524	0.0736353	0.0892478	0.0416027	0.0416027	0.0251735	0.0657289	0.0416027	0.0416027	0.0657289	0.0168535	0.17755	0.0814747	0.112175
SIGNALING BY HIPPO	22	168640	8.02798	5	-0.205636	0.914934	100	100	LATS1 (1.84 %) LATS2 (0.61 %) STK3 (0.61 %)	0.00846257	0.0168535	0.0251735	0.033423	0.00846257	0.211766	0.225051	0.334976	0.17053	0.156311	0.0814747	0.0251735	0.275987	0.0251735	0.263576	0.218437	0.0657289	0.0497133	0.0251735	0.0416027	0.17755	0.0168535	0.0251735	0.033423	0.0657289	0.0736353	0.134524	0.0736353	0.0892478	0.0416027	0.0416027	0.0251735	0.0657289	0.0416027	0.0416027	0.0657289	0.0168535	0.17755	0.0814747	0.112175
SIGNALING BY NOTCH2	12	84568	8.02798	5	-0.205636	0.914934	100	100	JAG2 (1.84 %) JAG1 (0.61 %) NOTCH2 (0.61 %)	0.00846257	0.0168535	0.0251735	0.033423	0.00846257	0.211766	0.225051	0.334976	0.17053	0.156311	0.0814747	0.0251735	0.275987	0.0251735	0.263576	0.218437	0.0657289	0.0497133	0.0251735	0.0416027	0.17755	0.0168535	0.0251735	0.033423	0.0657289	0.0736353	0.134524	0.0736353	0.0892478	0.0416027	0.0416027	0.0251735	0.0657289	0.0416027	0.0416027	0.0657289	0.0168535	0.17755	0.0814747	0.112175
NRAGE SIGNALS DEATH THROUGH JNK	43	412531	8.02798	5	-0.205636	0.914934	100	100	VAV3 (1.23 %) VAV1 (1.23 %) MAPK8 (0.61 %)	0.00846257	0.0168535	0.0251735	0.033423	0.00846257	0.211766	0.225051	0.334976	0.17053	0.156311	0.0814747	0.0251735	0.275987	0.0251735	0.263576	0.218437	0.0657289	0.0497133	0.0251735	0.0416027	0.17755	0.0168535	0.0251735	0.033423	0.0657289	0.0736353	0.134524	0.0736353	0.0892478	0.0416027	0.0416027	0.0251735	0.0657289	0.0416027	0.0416027	0.0657289	0.0168535	0.17755	0.0814747	0.112175
CELL DEATH SIGNALLING VIA NRAGE NRIF AND NADE	60	486327	8.02798	5	-0.205636	0.914934	100	100	VAV3 (1.23 %) VAV1 (1.23 %) MAPK8 (0.61 %)	0.00846257	0.0168535	0.0251735	0.033423	0.00846257	0.211766	0.225051	0.334976	0.17053	0.156311	0.0814747	0.0251735	0.275987	0.0251735	0.263576	0.218437	0.0657289	0.0497133	0.0251735	0.0416027	0.17755	0.0168535	0.0251735	0.033423	0.0657289	0.0736353	0.134524	0.0736353	0.0892478	0.0416027	0.0416027	0.0251735	0.0657289	0.0416027	0.0416027	0.0657289	0.0168535	0.17755	0.0814747	0.112175
PKA MEDIATED PHOSPHORYLATION OF CREB	18	133757	8.02798	5	-0.205636	0.914934	100	100	PRKACB (1.84 %) PRKACA (0.61 %) PRKAR1A (0.61 %)	0.00846257	0.0168535	0.0251735	0.033423	0.00846257	0.211766	0.225051	0.334976	0.17053	0.156311	0.0814747	0.0251735	0.275987	0.0251735	0.263576	0.218437	0.0657289	0.0497133	0.0251735	0.0416027	0.17755	0.0168535	0.0251735	0.033423	0.0657289	0.0736353	0.134524	0.0736353	0.0892478	0.0416027	0.0416027	0.0251735	0.0657289	0.0416027	0.0416027	0.0657289	0.0168535	0.17755	0.0814747	0.112175
METABOLISM OF PROTEINS	518	2240340	8.02798	5	-0.205636	0.914934	100	100	EIF4G1 (1.23 %) FBXW7 (1.23 %) RPSA (0.61 %)	0.00846257	0.0168535	0.0251735	0.033423	0.00846257	0.211766	0.225051	0.334976	0.17053	0.156311	0.0814747	0.0251735	0.275987	0.0251735	0.263576	0.218437	0.0657289	0.0497133	0.0251735	0.0416027	0.17755	0.0168535	0.0251735	0.033423	0.0657289	0.0736353	0.134524	0.0736353	0.0892478	0.0416027	0.0416027	0.0251735	0.0657289	0.0416027	0.0416027	0.0657289	0.0168535	0.17755	0.0814747	0.112175
SEMA4D INDUCED CELL MIGRATION AND GROWTH CONE COLLAPSE	27	199560	8.02798	5	-0.205636	0.914934	100	80	ERBB2 (1.84 %) RHOB (0.61 %) ROCK1 (0.61 %)	0.00846257	0.0168535	0.0251735	0.033423	0.00846257	0.211766	0.225051	0.334976	0.17053	0.156311	0.0814747	0.0251735	0.275987	0.0251735	0.263576	0.218437	0.0657289	0.0497133	0.0251735	0.0416027	0.17755	0.0168535	0.0251735	0.033423	0.0657289	0.0736353	0.134524	0.0736353	0.0892478	0.0416027	0.0416027	0.0251735	0.0657289	0.0416027	0.0416027	0.0657289	0.0168535	0.17755	0.0814747	0.112175
NEPHRIN INTERACTIONS	20	150840	8.02798	5	-0.205636	0.914934	100	80	FYN (1.84 %) PIK3R2 (1.23 %) PIK3CA (0.61 %)	0.00846257	0.0168535	0.0251735	0.033423	0.00846257	0.211766	0.225051	0.334976	0.17053	0.156311	0.0814747	0.0251735	0.275987	0.0251735	0.263576	0.218437	0.0657289	0.0497133	0.0251735	0.0416027	0.17755	0.0168535	0.0251735	0.033423	0.0657289	0.0736353	0.134524	0.0736353	0.0892478	0.0416027	0.0416027	0.0251735	0.0657289	0.0416027	0.0416027	0.0657289	0.0168535	0.17755	0.0814747	0.112175
REGULATION OF MRNA STABILITY BY PROTEINS THAT BIND AU RICH ELEMENTS	84	459372	8.02798	5	-0.205636	0.914934	100	100	EIF4G1 (1.23 %) AKT1 (1.23 %) PRKCD (0.61 %)	0.00846257	0.0168535	0.0251735	0.033423	0.00846257	0.211766	0.225051	0.334976	0.17053	0.156311	0.0814747	0.0251735	0.275987	0.0251735	0.263576	0.218437	0.0657289	0.0497133	0.0251735	0.0416027	0.17755	0.0168535	0.0251735	0.033423	0.0657289	0.0736353	0.134524	0.0736353	0.0892478	0.0416027	0.0416027	0.0251735	0.0657289	0.0416027	0.0416027	0.0657289	0.0168535	0.17755	0.0814747	0.112175
INTERFERON ALPHA BETA SIGNALING	64	302808	8.02798	5	-0.205636	0.914934	100	80	JAK1 (1.23 %) TYK2 (1.23 %) STAT2 (0.61 %)	0.00846257	0.0168535	0.0251735	0.033423	0.00846257	0.211766	0.225051	0.334976	0.17053	0.156311	0.0814747	0.0251735	0.275987	0.0251735	0.263576	0.218437	0.0657289	0.0497133	0.0251735	0.0416027	0.17755	0.0168535	0.0251735	0.033423	0.0657289	0.0736353	0.134524	0.0736353	0.0892478	0.0416027	0.0416027	0.0251735	0.0657289	0.0416027	0.0416027	0.0657289	0.0168535	0.17755	0.0814747	0.112175
REGULATION OF IFNA SIGNALING	24	64849	8.02798	5	-0.205636	0.914934	100	80	JAK1 (1.23 %) TYK2 (1.23 %) STAT2 (0.61 %)	0.00846257	0.0168535	0.0251735	0.033423	0.00846257	0.211766	0.225051	0.334976	0.17053	0.156311	0.0814747	0.0251735	0.275987	0.0251735	0.263576	0.218437	0.0657289	0.0497133	0.0251735	0.0416027	0.17755	0.0168535	0.0251735	0.033423	0.0657289	0.0736353	0.134524	0.0736353	0.0892478	0.0416027	0.0416027	0.0251735	0.0657289	0.0416027	0.0416027	0.0657289	0.0168535	0.17755	0.0814747	0.112175
CLASS I MHC MEDIATED ANTIGEN PROCESSING PRESENTATION	251	1450375	8.02798	5	-0.205636	0.914934	100	100	FBXW7 (1.23 %) CBLB (1.23 %) VHL (0.61 %)	0.00846257	0.0168535	0.0251735	0.033423	0.00846257	0.211766	0.225051	0.334976	0.17053	0.156311	0.0814747	0.0251735	0.275987	0.0251735	0.263576	0.218437	0.0657289	0.0497133	0.0251735	0.0416027	0.17755	0.0168535	0.0251735	0.033423	0.0657289	0.0736353	0.134524	0.0736353	0.0892478	0.0416027	0.0416027	0.0251735	0.0657289	0.0416027	0.0416027	0.0657289	0.0168535	0.17755	0.0814747	0.112175
ANTIGEN PROCESSING UBIQUITINATION PROTEASOME DEGRADATION	212	1137331	8.02798	5	-0.205636	0.914934	100	100	FBXW7 (1.23 %) CBLB (1.23 %) VHL (0.61 %)	0.00846257	0.0168535	0.0251735	0.033423	0.00846257	0.211766	0.225051	0.334976	0.17053	0.156311	0.0814747	0.0251735	0.275987	0.0251735	0.263576	0.218437	0.0657289	0.0497133	0.0251735	0.0416027	0.17755	0.0168535	0.0251735	0.033423	0.0657289	0.0736353	0.134524	0.0736353	0.0892478	0.0416027	0.0416027	0.0251735	0.0657289	0.0416027	0.0416027	0.0657289	0.0168535	0.17755	0.0814747	0.112175
PAR1 PATHWAY	37	308275	10.4996	7	-0.176074	0.915292	100	71.4286	PIK3CG (3.07 %) PRKCB (1.23 %) ROCK1 (0.61 %) PIK3CA (0.61 %)	0.0112675	0.022408	0.033423	0.0443139	0.0112675	0.271873	0.288189	0.419525	0.220647	0.202783	0.10713	0.033423	0.349878	0.033423	0.334976	0.280078	0.0866641	0.0657289	0.033423	0.0550821	0.229429	0.022408	0.033423	0.0443139	0.0866641	0.0969551	0.175217	0.0969551	0.117191	0.0550821	0.0550821	0.033423	0.0866641	0.0550821	0.0550821	0.0866641	0.022408	0.229429	0.10713	0.146697
INSULIN GLUCOSE PATHWAY	26	169903	10.4996	7	-0.176074	0.915292	100	85.7143	INSR (1.84 %) GSK3B (1.23 %) AKT1 (1.23 %) PRKCI (0.61 %)	0.0112675	0.022408	0.033423	0.0443139	0.0112675	0.271873	0.288189	0.419525	0.220647	0.202783	0.10713	0.033423	0.349878	0.033423	0.334976	0.280078	0.0866641	0.0657289	0.033423	0.0550821	0.229429	0.022408	0.033423	0.0443139	0.0866641	0.0969551	0.175217	0.0969551	0.117191	0.0550821	0.0550821	0.033423	0.0866641	0.0550821	0.0550821	0.0866641	0.022408	0.229429	0.10713	0.146697
TAK1 ACTIVATES NFKB BY PHOSPHORYLATION AND ACTIVATION OF IKKS COMPLEX	23	124611	10.4996	7	-0.176074	0.915292	100	100	IRAK2 (1.84 %) IRAK1 (1.23 %) IKBKB (0.61 %) RELA (0.61 %)	0.0112675	0.022408	0.033423	0.0443139	0.0112675	0.271873	0.288189	0.419525	0.220647	0.202783	0.10713	0.033423	0.349878	0.033423	0.334976	0.280078	0.0866641	0.0657289	0.033423	0.0550821	0.229429	0.022408	0.033423	0.0443139	0.0866641	0.0969551	0.175217	0.0969551	0.117191	0.0550821	0.0550821	0.033423	0.0866641	0.0550821	0.0550821	0.0866641	0.022408	0.229429	0.10713	0.146697
SIGNAL ATTENUATION	14	82451	10.4996	7	-0.176074	0.915292	100	85.7143	INSR (1.84 %) IRS1 (1.84 %) SHC3 (0.61 %) SHC1 (0.61 %)	0.0112675	0.022408	0.033423	0.0443139	0.0112675	0.271873	0.288189	0.419525	0.220647	0.202783	0.10713	0.033423	0.349878	0.033423	0.334976	0.280078	0.0866641	0.0657289	0.033423	0.0550821	0.229429	0.022408	0.033423	0.0443139	0.0866641	0.0969551	0.175217	0.0969551	0.117191	0.0550821	0.0550821	0.033423	0.0866641	0.0550821	0.0550821	0.0866641	0.022408	0.229429	0.10713	0.146697
HOST INTERACTIONS OF HIV FACTORS	132	714890	10.4996	7	-0.176074	0.915292	100	71.4286	FYN (1.84 %) HCK (1.84 %) CDK9 (0.61 %) LCK (0.61 %)	0.0112675	0.022408	0.033423	0.0443139	0.0112675	0.271873	0.288189	0.419525	0.220647	0.202783	0.10713	0.033423	0.349878	0.033423	0.334976	0.280078	0.0866641	0.0657289	0.033423	0.0550821	0.229429	0.022408	0.033423	0.0443139	0.0866641	0.0969551	0.175217	0.0969551	0.117191	0.0550821	0.0550821	0.033423	0.0866641	0.0550821	0.0550821	0.0866641	0.022408	0.229429	0.10713	0.146697
NOD1 2 SIGNALING PATHWAY	30	188217	10.4996	7	-0.176074	0.915292	100	100	IRAK2 (1.84 %) IRAK1 (1.23 %) IKBKB (0.61 %) MAP2K6 (0.61 %)	0.0112675	0.022408	0.033423	0.0443139	0.0112675	0.271873	0.288189	0.419525	0.220647	0.202783	0.10713	0.033423	0.349878	0.033423	0.334976	0.280078	0.0866641	0.0657289	0.033423	0.0550821	0.229429	0.022408	0.033423	0.0443139	0.0866641	0.0969551	0.175217	0.0969551	0.117191	0.0550821	0.0550821	0.033423	0.0866641	0.0550821	0.0550821	0.0866641	0.022408	0.229429	0.10713	0.146697
NUCLEOTIDE BINDING DOMAIN LEUCINE RICH REPEAT CONTAINING RECEPTOR NLR SIGNALING PATHWAYS	46	259820	10.4996	7	-0.176074	0.915292	100	100	IRAK2 (1.84 %) IRAK1 (1.23 %) IKBKB (0.61 %) MAP2K6 (0.61 %)	0.0112675	0.022408	0.033423	0.0443139	0.0112675	0.271873	0.288189	0.419525	0.220647	0.202783	0.10713	0.033423	0.349878	0.033423	0.334976	0.280078	0.0866641	0.0657289	0.033423	0.0550821	0.229429	0.022408	0.033423	0.0443139	0.0866641	0.0969551	0.175217	0.0969551	0.117191	0.0550821	0.0550821	0.033423	0.0866641	0.0550821	0.0550821	0.0866641	0.022408	0.229429	0.10713	0.146697
WNT NONCANONICAL PATHWAY	32	207138	12.8801	9	-0.155675	0.915387	100	88.8889	ROR2 (3.07 %) YES1 (1.23 %) NLK (0.61 %) ROCK1 (0.61 %) MAPK8 (0.61 %)	0.0140645	0.0279311	0.0416027	0.0550821	0.0140645	0.327397	0.346184	0.493326	0.267736	0.246696	0.132069	0.0416027	0.416227	0.0416027	0.399453	0.336857	0.10713	0.0814747	0.0416027	0.0683719	0.278035	0.0279311	0.0416027	0.0550821	0.10713	0.119688	0.213996	0.119688	0.144276	0.0683719	0.0683719	0.0416027	0.10713	0.0683719	0.0683719	0.10713	0.0279311	0.278035	0.132069	0.179876
IL 7 SIGNALING	11	69141	12.8801	9	-0.155675	0.915387	100	77.7778	JAK3 (1.84 %) JAK1 (1.23 %) PIK3R2 (1.23 %) STAT5B (1.23 %) STAT5A (0.61 %)	0.0140645	0.0279311	0.0416027	0.0550821	0.0140645	0.327397	0.346184	0.493326	0.267736	0.246696	0.132069	0.0416027	0.416227	0.0416027	0.399453	0.336857	0.10713	0.0814747	0.0416027	0.0683719	0.278035	0.0279311	0.0416027	0.0550821	0.10713	0.119688	0.213996	0.119688	0.144276	0.0683719	0.0683719	0.0416027	0.10713	0.0683719	0.0683719	0.10713	0.0279311	0.278035	0.132069	0.179876
CA DEPENDENT EVENTS	30	218250	12.8801	9	-0.155675	0.915387	100	88.8889	PRKCG (2.45 %) PRKACB (1.84 %) PRKACA (0.61 %) PRKAR1A (0.61 %) PRKCD (0.61 %)	0.0140645	0.0279311	0.0416027	0.0550821	0.0140645	0.327397	0.346184	0.493326	0.267736	0.246696	0.132069	0.0416027	0.416227	0.0416027	0.399453	0.336857	0.10713	0.0814747	0.0416027	0.0683719	0.278035	0.0279311	0.0416027	0.0550821	0.10713	0.119688	0.213996	0.119688	0.144276	0.0683719	0.0683719	0.0416027	0.10713	0.0683719	0.0683719	0.10713	0.0279311	0.278035	0.132069	0.179876
PLC BETA MEDIATED EVENTS	43	332998	12.8801	9	-0.155675	0.915387	100	88.8889	PRKCG (2.45 %) PRKACB (1.84 %) PRKACA (0.61 %) PRKAR1A (0.61 %) PRKCD (0.61 %)	0.0140645	0.0279311	0.0416027	0.0550821	0.0140645	0.327397	0.346184	0.493326	0.267736	0.246696	0.132069	0.0416027	0.416227	0.0416027	0.399453	0.336857	0.10713	0.0814747	0.0416027	0.0683719	0.278035	0.0279311	0.0416027	0.0550821	0.10713	0.119688	0.213996	0.119688	0.144276	0.0683719	0.0683719	0.0416027	0.10713	0.0683719	0.0683719	0.10713	0.0279311	0.278035	0.132069	0.179876
METABOLISM OF MRNA	284	1077925	12.8801	9	-0.155675	0.915387	100	100	SMG1 (1.84 %) EIF4G1 (1.23 %) AKT1 (1.23 %) RPSA (0.61 %) PRKCD (0.61 %)	0.0140645	0.0279311	0.0416027	0.0550821	0.0140645	0.327397	0.346184	0.493326	0.267736	0.246696	0.132069	0.0416027	0.416227	0.0416027	0.399453	0.336857	0.10713	0.0814747	0.0416027	0.0683719	0.278035	0.0279311	0.0416027	0.0550821	0.10713	0.119688	0.213996	0.119688	0.144276	0.0683719	0.0683719	0.0416027	0.10713	0.0683719	0.0683719	0.10713	0.0279311	0.278035	0.132069	0.179876
METABOLISM OF RNA	330	1322363	12.8801	9	-0.155675	0.915387	100	100	SMG1 (1.84 %) EIF4G1 (1.23 %) AKT1 (1.23 %) RPSA (0.61 %) PRKCD (0.61 %)	0.0140645	0.0279311	0.0416027	0.0550821	0.0140645	0.327397	0.346184	0.493326	0.267736	0.246696	0.132069	0.0416027	0.416227	0.0416027	0.399453	0.336857	0.10713	0.0814747	0.0416027	0.0683719	0.278035	0.0279311	0.0416027	0.0550821	0.10713	0.119688	0.213996	0.119688	0.144276	0.0683719	0.0683719	0.0416027	0.10713	0.0683719	0.0683719	0.10713	0.0279311	0.278035	0.132069	0.179876
HEMATOPOIETIC CELL LINEAGE	88	412161	5.45893	3	-0.259986	0.917708	100	100	CSF1R (1.23 %) KIT (0.61 %)	0.0056497	0.0112675	0.0168535	0.022408	0.0056497	0.146697	0.156311	0.238111	0.117191	0.10713	0.0550821	0.0168535	0.193698	0.0168535	0.18451	0.151518	0.0443139	0.033423	0.0168535	0.0279311	0.122178	0.0112675	0.0168535	0.022408	0.0443139	0.0497133	0.0918242	0.0497133	0.0604206	0.0279311	0.0279311	0.0168535	0.0443139	0.0279311	0.0279311	0.0443139	0.0112675	0.122178	0.0550821	0.0762558
ALZHEIMERS DISEASE	169	859720	5.45893	3	-0.259986	0.917708	100	100	GSK3B (1.23 %) CDK5 (0.61 %)	0.0056497	0.0112675	0.0168535	0.022408	0.0056497	0.146697	0.156311	0.238111	0.117191	0.10713	0.0550821	0.0168535	0.193698	0.0168535	0.18451	0.151518	0.0443139	0.033423	0.0168535	0.0279311	0.122178	0.0112675	0.0168535	0.022408	0.0443139	0.0497133	0.0918242	0.0497133	0.0604206	0.0279311	0.0279311	0.0168535	0.0443139	0.0279311	0.0279311	0.0443139	0.0112675	0.122178	0.0550821	0.0762558
P35ALZHEIMERS PATHWAY	11	101872	5.45893	3	-0.259986	0.917708	100	100	GSK3B (1.23 %) CDK5 (0.61 %)	0.0056497	0.0112675	0.0168535	0.022408	0.0056497	0.146697	0.156311	0.238111	0.117191	0.10713	0.0550821	0.0168535	0.193698	0.0168535	0.18451	0.151518	0.0443139	0.033423	0.0168535	0.0279311	0.122178	0.0112675	0.0168535	0.022408	0.0443139	0.0497133	0.0918242	0.0497133	0.0604206	0.0279311	0.0279311	0.0168535	0.0443139	0.0279311	0.0279311	0.0443139	0.0112675	0.122178	0.0550821	0.0762558
CALCINEURIN PATHWAY	21	129523	5.45893	3	-0.259986	0.917708	100	100	PRKCB (1.23 %) PLCG1 (0.61 %)	0.0056497	0.0112675	0.0168535	0.022408	0.0056497	0.146697	0.156311	0.238111	0.117191	0.10713	0.0550821	0.0168535	0.193698	0.0168535	0.18451	0.151518	0.0443139	0.033423	0.0168535	0.0279311	0.122178	0.0112675	0.0168535	0.022408	0.0443139	0.0497133	0.0918242	0.0497133	0.0604206	0.0279311	0.0279311	0.0168535	0.0443139	0.0279311	0.0279311	0.0443139	0.0112675	0.122178	0.0550821	0.0762558
MYOSIN PATHWAY	31	276740	5.45893	3	-0.259986	0.917708	100	100	PRKCB (1.23 %) ROCK1 (0.61 %)	0.0056497	0.0112675	0.0168535	0.022408	0.0056497	0.146697	0.156311	0.238111	0.117191	0.10713	0.0550821	0.0168535	0.193698	0.0168535	0.18451	0.151518	0.0443139	0.033423	0.0168535	0.0279311	0.122178	0.0112675	0.0168535	0.022408	0.0443139	0.0497133	0.0918242	0.0497133	0.0604206	0.0279311	0.0279311	0.0168535	0.0443139	0.0279311	0.0279311	0.0443139	0.0112675	0.122178	0.0550821	0.0762558
UCALPAIN PATHWAY	18	123909	5.45893	3	-0.259986	0.917708	100	100	PTK2 (1.23 %) SRC (0.61 %)	0.0056497	0.0112675	0.0168535	0.022408	0.0056497	0.146697	0.156311	0.238111	0.117191	0.10713	0.0550821	0.0168535	0.193698	0.0168535	0.18451	0.151518	0.0443139	0.033423	0.0168535	0.0279311	0.122178	0.0112675	0.0168535	0.022408	0.0443139	0.0497133	0.0918242	0.0497133	0.0604206	0.0279311	0.0279311	0.0168535	0.0443139	0.0279311	0.0279311	0.0443139	0.0112675	0.122178	0.0550821	0.0762558
GAQ PATHWAY	28	226064	5.45893	3	-0.259986	0.917708	100	100	AKT1 (1.23 %) AKT3 (0.61 %)	0.0056497	0.0112675	0.0168535	0.022408	0.0056497	0.146697	0.156311	0.238111	0.117191	0.10713	0.0550821	0.0168535	0.193698	0.0168535	0.18451	0.151518	0.0443139	0.033423	0.0168535	0.0279311	0.122178	0.0112675	0.0168535	0.022408	0.0443139	0.0497133	0.0918242	0.0497133	0.0604206	0.0279311	0.0279311	0.0168535	0.0443139	0.0279311	0.0279311	0.0443139	0.0112675	0.122178	0.0550821	0.0762558
INTEGRIN A9B1 PATHWAY	25	157805	5.45893	3	-0.259986	0.917708	100	100	VEGFC (1.23 %) SRC (0.61 %)	0.0056497	0.0112675	0.0168535	0.022408	0.0056497	0.146697	0.156311	0.238111	0.117191	0.10713	0.0550821	0.0168535	0.193698	0.0168535	0.18451	0.151518	0.0443139	0.033423	0.0168535	0.0279311	0.122178	0.0112675	0.0168535	0.022408	0.0443139	0.0497133	0.0918242	0.0497133	0.0604206	0.0279311	0.0279311	0.0168535	0.0443139	0.0279311	0.0279311	0.0443139	0.0112675	0.122178	0.0550821	0.0762558
LIS1 PATHWAY	28	192070	5.45893	3	-0.259986	0.917708	100	100	ABL1 (1.23 %) CDK5 (0.61 %)	0.0056497	0.0112675	0.0168535	0.022408	0.0056497	0.146697	0.156311	0.238111	0.117191	0.10713	0.0550821	0.0168535	0.193698	0.0168535	0.18451	0.151518	0.0443139	0.033423	0.0168535	0.0279311	0.122178	0.0112675	0.0168535	0.022408	0.0443139	0.0497133	0.0918242	0.0497133	0.0604206	0.0279311	0.0279311	0.0168535	0.0443139	0.0279311	0.0279311	0.0443139	0.0112675	0.122178	0.0550821	0.0762558
SMAD2 3PATHWAY	17	158388	5.45893	3	-0.259986	0.917708	100	66.6667	SMAD4 (1.23 %) SMAD2 (0.61 %)	0.0056497	0.0112675	0.0168535	0.022408	0.0056497	0.146697	0.156311	0.238111	0.117191	0.10713	0.0550821	0.0168535	0.193698	0.0168535	0.18451	0.151518	0.0443139	0.033423	0.0168535	0.0279311	0.122178	0.0112675	0.0168535	0.022408	0.0443139	0.0497133	0.0918242	0.0497133	0.0604206	0.0279311	0.0279311	0.0168535	0.0443139	0.0279311	0.0279311	0.0443139	0.0112675	0.122178	0.0550821	0.0762558
HNF3A PATHWAY	44	271172	5.45893	3	-0.259986	0.917708	100	100	FOS (1.23 %) BRCA1 (0.61 %)	0.0056497	0.0112675	0.0168535	0.022408	0.0056497	0.146697	0.156311	0.238111	0.117191	0.10713	0.0550821	0.0168535	0.193698	0.0168535	0.18451	0.151518	0.0443139	0.033423	0.0168535	0.0279311	0.122178	0.0112675	0.0168535	0.022408	0.0443139	0.0497133	0.0918242	0.0497133	0.0604206	0.0279311	0.0279311	0.0168535	0.0443139	0.0279311	0.0279311	0.0443139	0.0112675	0.122178	0.0550821	0.0762558
TRANSLATION	222	631151	5.45893	3	-0.259986	0.917708	100	100	EIF4G1 (1.23 %) RPSA (0.61 %)	0.0056497	0.0112675	0.0168535	0.022408	0.0056497	0.146697	0.156311	0.238111	0.117191	0.10713	0.0550821	0.0168535	0.193698	0.0168535	0.18451	0.151518	0.0443139	0.033423	0.0168535	0.0279311	0.122178	0.0112675	0.0168535	0.022408	0.0443139	0.0497133	0.0918242	0.0497133	0.0604206	0.0279311	0.0279311	0.0168535	0.0443139	0.0279311	0.0279311	0.0443139	0.0112675	0.122178	0.0550821	0.0762558
PYRUVATE METABOLISM AND CITRIC ACID TCA CYCLE	48	218064	5.45893	3	-0.259986	0.917708	100	100	FH (1.23 %) PDK1 (0.61 %)	0.0056497	0.0112675	0.0168535	0.022408	0.0056497	0.146697	0.156311	0.238111	0.117191	0.10713	0.0550821	0.0168535	0.193698	0.0168535	0.18451	0.151518	0.0443139	0.033423	0.0168535	0.0279311	0.122178	0.0112675	0.0168535	0.022408	0.0443139	0.0497133	0.0918242	0.0497133	0.0604206	0.0279311	0.0279311	0.0168535	0.0443139	0.0279311	0.0279311	0.0443139	0.0112675	0.122178	0.0550821	0.0762558
TCA CYCLE AND RESPIRATORY ELECTRON TRANSPORT	141	476959	5.45893	3	-0.259986	0.917708	100	100	FH (1.23 %) PDK1 (0.61 %)	0.0056497	0.0112675	0.0168535	0.022408	0.0056497	0.146697	0.156311	0.238111	0.117191	0.10713	0.0550821	0.0168535	0.193698	0.0168535	0.18451	0.151518	0.0443139	0.033423	0.0168535	0.0279311	0.122178	0.0112675	0.0168535	0.022408	0.0443139	0.0497133	0.0918242	0.0497133	0.0604206	0.0279311	0.0279311	0.0168535	0.0443139	0.0279311	0.0279311	0.0443139	0.0112675	0.122178	0.0550821	0.0762558
ACTIVATION OF THE MRNA UPON BINDING OF THE CAP BINDING COMPLEX AND EIFS AND SUBSEQUENT BINDING TO 43S	84	250529	5.45893	3	-0.259986	0.917708	100	100	EIF4G1 (1.23 %) RPSA (0.61 %)	0.0056497	0.0112675	0.0168535	0.022408	0.0056497	0.146697	0.156311	0.238111	0.117191	0.10713	0.0550821	0.0168535	0.193698	0.0168535	0.18451	0.151518	0.0443139	0.033423	0.0168535	0.0279311	0.122178	0.0112675	0.0168535	0.022408	0.0443139	0.0497133	0.0918242	0.0497133	0.0604206	0.0279311	0.0279311	0.0168535	0.0443139	0.0279311	0.0279311	0.0443139	0.0112675	0.122178	0.0550821	0.0762558
P130CAS LINKAGE TO MAPK SIGNALING FOR INTEGRINS	15	117924	5.45893	3	-0.259986	0.917708	100	100	PTK2 (1.23 %) SRC (0.61 %)	0.0056497	0.0112675	0.0168535	0.022408	0.0056497	0.146697	0.156311	0.238111	0.117191	0.10713	0.0550821	0.0168535	0.193698	0.0168535	0.18451	0.151518	0.0443139	0.033423	0.0168535	0.0279311	0.122178	0.0112675	0.0168535	0.022408	0.0443139	0.0497133	0.0918242	0.0497133	0.0604206	0.0279311	0.0279311	0.0168535	0.0443139	0.0279311	0.0279311	0.0443139	0.0112675	0.122178	0.0550821	0.0762558
GRB2 SOS PROVIDES LINKAGE TO MAPK SIGNALING FOR INTERGRINS	15	118635	5.45893	3	-0.259986	0.917708	100	100	PTK2 (1.23 %) SRC (0.61 %)	0.0056497	0.0112675	0.0168535	0.022408	0.0056497	0.146697	0.156311	0.238111	0.117191	0.10713	0.0550821	0.0168535	0.193698	0.0168535	0.18451	0.151518	0.0443139	0.033423	0.0168535	0.0279311	0.122178	0.0112675	0.0168535	0.022408	0.0443139	0.0497133	0.0918242	0.0497133	0.0604206	0.0279311	0.0279311	0.0168535	0.0443139	0.0279311	0.0279311	0.0443139	0.0112675	0.122178	0.0550821	0.0762558
3 UTR MEDIATED TRANSLATIONAL REGULATION	176	447747	5.45893	3	-0.259986	0.917708	100	100	EIF4G1 (1.23 %) RPSA (0.61 %)	0.0056497	0.0112675	0.0168535	0.022408	0.0056497	0.146697	0.156311	0.238111	0.117191	0.10713	0.0550821	0.0168535	0.193698	0.0168535	0.18451	0.151518	0.0443139	0.033423	0.0168535	0.0279311	0.122178	0.0112675	0.0168535	0.022408	0.0443139	0.0497133	0.0918242	0.0497133	0.0604206	0.0279311	0.0279311	0.0168535	0.0443139	0.0279311	0.0279311	0.0443139	0.0112675	0.122178	0.0550821	0.0762558
CYCLIN A B1 ASSOCIATED EVENTS DURING G2 M TRANSITION	15	67717	5.45893	3	-0.259986	0.917708	100	100	CDC25A (1.23 %) CDK7 (0.61 %)	0.0056497	0.0112675	0.0168535	0.022408	0.0056497	0.146697	0.156311	0.238111	0.117191	0.10713	0.0550821	0.0168535	0.193698	0.0168535	0.18451	0.151518	0.0443139	0.033423	0.0168535	0.0279311	0.122178	0.0112675	0.0168535	0.022408	0.0443139	0.0497133	0.0918242	0.0497133	0.0604206	0.0279311	0.0279311	0.0168535	0.0443139	0.0279311	0.0279311	0.0443139	0.0112675	0.122178	0.0550821	0.0762558
SIGNAL REGULATORY PROTEIN SIRP FAMILY INTERACTIONS	12	71691	5.45893	3	-0.259986	0.917708	100	100	PTK2 (1.23 %) SRC (0.61 %)	0.0056497	0.0112675	0.0168535	0.022408	0.0056497	0.146697	0.156311	0.238111	0.117191	0.10713	0.0550821	0.0168535	0.193698	0.0168535	0.18451	0.151518	0.0443139	0.033423	0.0168535	0.0279311	0.122178	0.0112675	0.0168535	0.022408	0.0443139	0.0497133	0.0918242	0.0497133	0.0604206	0.0279311	0.0279311	0.0168535	0.0443139	0.0279311	0.0279311	0.0443139	0.0112675	0.122178	0.0550821	0.0762558
IRAK1 RECRUITS IKK COMPLEX	10	52923	5.45893	3	-0.259986	0.917708	100	100	IRAK1 (1.23 %) IKBKB (0.61 %)	0.0056497	0.0112675	0.0168535	0.022408	0.0056497	0.146697	0.156311	0.238111	0.117191	0.10713	0.0550821	0.0168535	0.193698	0.0168535	0.18451	0.151518	0.0443139	0.033423	0.0168535	0.0279311	0.122178	0.0112675	0.0168535	0.022408	0.0443139	0.0497133	0.0918242	0.0497133	0.0604206	0.0279311	0.0279311	0.0168535	0.0443139	0.0279311	0.0279311	0.0443139	0.0112675	0.122178	0.0550821	0.0762558
T CELL SIGNAL TRANSDUCTION	45	294332	25.5423	20	-0.10623	0.926327	100	80	PAK3 (3.07 %) PAK7 (2.45 %) PAK4 (1.84 %) ITK (1.84 %) VAV1 (1.23 %) PAK6 (1.23 %) FBXW7 (1.23 %) ZAP70 (0.61 %) LCK (0.61 %) PLCG1 (0.61 %) RAF1 (0.61 %)	0.030681	0.0604206	0.0892478	0.117191	0.030681	0.582103	0.607353	0.77592	0.496188	0.46379	0.267736	0.0892478	0.69399	0.0892478	0.674311	0.594925	0.220647	0.17053	0.0892478	0.144276	0.511646	0.0604206	0.0892478	0.117191	0.220647	0.244559	0.411245	0.244559	0.290203	0.144276	0.144276	0.0892478	0.220647	0.144276	0.144276	0.220647	0.0604206	0.511646	0.267736	0.353551
FGF PATHWAY	55	351443	31.0188	25	-0.093685	0.928344	100	76	FGFR4 (4.29 %) FGFR1 (1.84 %) FGFR2 (1.84 %) PTPN11 (1.84 %) MET (1.84 %) PAK4 (1.84 %) AKT1 (1.23 %) STAT5B (1.23 %) FOS (1.23 %) PLCG1 (0.61 %) RPS6KA1 (0.61 %) SRC (0.61 %) SHC1 (0.61 %) PIK3CA (0.61 %)	0.0388839	0.0762558	0.112175	0.146697	0.0388839	0.6706	0.695718	0.850981	0.582103	0.547606	0.327397	0.112175	0.778444	0.112175	0.760155	0.683408	0.271873	0.211766	0.112175	0.179876	0.598353	0.0762558	0.112175	0.146697	0.271873	0.300186	0.490447	0.300186	0.353551	0.179876	0.179876	0.112175	0.271873	0.179876	0.179876	0.271873	0.0762558	0.598353	0.327397	0.426066
METABOLISM OF LIPIDS AND LIPOPROTEINS	478	2692321	31.0188	25	-0.093685	0.928344	100	88	PIK3C3 (3.07 %) PIK3CG (3.07 %) PIK3C2G (2.45 %) PTEN (2.45 %) PRKACB (1.84 %) PIK3C2A (1.23 %) PIK3CD (1.23 %) PIK3R2 (1.23 %) PIK3C2B (0.61 %) PIK3CA (0.61 %) PI4KA (0.61 %) CROT (0.61 %) PRKACA (0.61 %) PRKD1 (0.61 %)	0.0388839	0.0762558	0.112175	0.146697	0.0388839	0.6706	0.695718	0.850981	0.582103	0.547606	0.327397	0.112175	0.778444	0.112175	0.760155	0.683408	0.271873	0.211766	0.112175	0.179876	0.598353	0.0762558	0.112175	0.146697	0.271873	0.300186	0.490447	0.300186	0.353551	0.179876	0.179876	0.112175	0.271873	0.179876	0.179876	0.271873	0.0762558	0.598353	0.327397	0.426066
GLYPICAN 1PATHWAY	27	208604	23.6024	18	-0.117683	0.934352	100	83.3333	FLT1 (2.45 %) HCK (1.84 %) FGFR1 (1.84 %) FYN (1.84 %) YES1 (1.23 %) SRC (0.61 %) TGFBR1 (0.61 %) TGFBR2 (0.61 %) LCK (0.61 %) SMAD2 (0.61 %)	0.0279311	0.0550821	0.0814747	0.10713	0.0279311	0.547606	0.572525	0.743281	0.46379	0.432533	0.246696	0.0814747	0.659209	0.0814747	0.639344	0.560242	0.202783	0.156311	0.0814747	0.132069	0.478767	0.0550821	0.0814747	0.10713	0.202783	0.225051	0.382197	0.225051	0.267736	0.132069	0.132069	0.0814747	0.202783	0.132069	0.132069	0.202783	0.0550821	0.478767	0.246696	0.327397
RACCYCD PATHWAY	26	147807	21.5996	16	-0.130327	0.94092	100	87.5	RB1 (4.29 %) TFDP1 (2.45 %) AKT1 (1.23 %) HRAS (0.61 %) RAF1 (0.61 %) RELA (0.61 %) IKBKB (0.61 %) PIK3CA (0.61 %) CCNE1 (0.61 %)	0.0251735	0.0497133	0.0736353	0.0969551	0.0251735	0.51026	0.534607	0.705888	0.429309	0.399453	0.225051	0.0736353	0.620476	0.0736353	0.600622	0.522589	0.18451	0.141848	0.0736353	0.119688	0.443675	0.0497133	0.0736353	0.0969551	0.18451	0.205039	0.351717	0.205039	0.244559	0.119688	0.119688	0.0736353	0.18451	0.119688	0.119688	0.18451	0.0497133	0.443675	0.225051	0.300186
GLYCOLYSIS GLUCONEOGENESIS	62	264976	2.78547	1	-0.444898	0.941819	100	100	GCK (0.61 %)	0.00282885	0.0056497	0.00846257	0.0112675	0.00282885	0.0762558	0.0814747	0.127138	0.0604206	0.0550821	0.0279311	0.00846257	0.102057	0.00846257	0.0969551	0.078869	0.022408	0.0168535	0.00846257	0.0140645	0.0630785	0.0056497	0.00846257	0.0112675	0.022408	0.0251735	0.0470174	0.0251735	0.030681	0.0140645	0.0140645	0.00846257	0.022408	0.0140645	0.0140645	0.022408	0.0056497	0.0630785	0.0279311	0.0388839
GALACTOSE METABOLISM	26	136711	2.78547	1	-0.444898	0.941819	100	100	GCK (0.61 %)	0.00282885	0.0056497	0.00846257	0.0112675	0.00282885	0.0762558	0.0814747	0.127138	0.0604206	0.0550821	0.0279311	0.00846257	0.102057	0.00846257	0.0969551	0.078869	0.022408	0.0168535	0.00846257	0.0140645	0.0630785	0.0056497	0.00846257	0.0112675	0.022408	0.0251735	0.0470174	0.0251735	0.030681	0.0140645	0.0140645	0.00846257	0.022408	0.0140645	0.0140645	0.022408	0.0056497	0.0630785	0.0279311	0.0388839
HISTIDINE METABOLISM	29	150257	2.78547	1	-0.444898	0.941819	100	100	HEMK1 (0.61 %)	0.00282885	0.0056497	0.00846257	0.0112675	0.00282885	0.0762558	0.0814747	0.127138	0.0604206	0.0550821	0.0279311	0.00846257	0.102057	0.00846257	0.0969551	0.078869	0.022408	0.0168535	0.00846257	0.0140645	0.0630785	0.0056497	0.00846257	0.0112675	0.022408	0.0251735	0.0470174	0.0251735	0.030681	0.0140645	0.0140645	0.00846257	0.022408	0.0140645	0.0140645	0.022408	0.0056497	0.0630785	0.0279311	0.0388839
TYROSINE METABOLISM	42	201922	2.78547	1	-0.444898	0.941819	100	100	HEMK1 (0.61 %)	0.00282885	0.0056497	0.00846257	0.0112675	0.00282885	0.0762558	0.0814747	0.127138	0.0604206	0.0550821	0.0279311	0.00846257	0.102057	0.00846257	0.0969551	0.078869	0.022408	0.0168535	0.00846257	0.0140645	0.0630785	0.0056497	0.00846257	0.0112675	0.022408	0.0251735	0.0470174	0.0251735	0.030681	0.0140645	0.0140645	0.00846257	0.022408	0.0140645	0.0140645	0.022408	0.0056497	0.0630785	0.0279311	0.0388839
SELENOAMINO ACID METABOLISM	26	142125	2.78547	1	-0.444898	0.941819	100	100	HEMK1 (0.61 %)	0.00282885	0.0056497	0.00846257	0.0112675	0.00282885	0.0762558	0.0814747	0.127138	0.0604206	0.0550821	0.0279311	0.00846257	0.102057	0.00846257	0.0969551	0.078869	0.022408	0.0168535	0.00846257	0.0140645	0.0630785	0.0056497	0.00846257	0.0112675	0.022408	0.0251735	0.0470174	0.0251735	0.030681	0.0140645	0.0140645	0.00846257	0.022408	0.0140645	0.0140645	0.022408	0.0056497	0.0630785	0.0279311	0.0388839
STARCH AND SUCROSE METABOLISM	52	238011	2.78547	1	-0.444898	0.941819	100	100	GCK (0.61 %)	0.00282885	0.0056497	0.00846257	0.0112675	0.00282885	0.0762558	0.0814747	0.127138	0.0604206	0.0550821	0.0279311	0.00846257	0.102057	0.00846257	0.0969551	0.078869	0.022408	0.0168535	0.00846257	0.0140645	0.0630785	0.0056497	0.00846257	0.0112675	0.022408	0.0251735	0.0470174	0.0251735	0.030681	0.0140645	0.0140645	0.00846257	0.022408	0.0140645	0.0140645	0.022408	0.0056497	0.0630785	0.0279311	0.0388839
AMINO SUGAR AND NUCLEOTIDE SUGAR METABOLISM	44	243055	2.78547	1	-0.444898	0.941819	100	100	GCK (0.61 %)	0.00282885	0.0056497	0.00846257	0.0112675	0.00282885	0.0762558	0.0814747	0.127138	0.0604206	0.0550821	0.0279311	0.00846257	0.102057	0.00846257	0.0969551	0.078869	0.022408	0.0168535	0.00846257	0.0140645	0.0630785	0.0056497	0.00846257	0.0112675	0.022408	0.0251735	0.0470174	0.0251735	0.030681	0.0140645	0.0140645	0.00846257	0.022408	0.0140645	0.0140645	0.022408	0.0056497	0.0630785	0.0279311	0.0388839
GLYCOSAMINOGLYCAN DEGRADATION	21	112475	2.78547	1	-0.444898	0.941819	100	100	HYAL1 (0.61 %)	0.00282885	0.0056497	0.00846257	0.0112675	0.00282885	0.0762558	0.0814747	0.127138	0.0604206	0.0550821	0.0279311	0.00846257	0.102057	0.00846257	0.0969551	0.078869	0.022408	0.0168535	0.00846257	0.0140645	0.0630785	0.0056497	0.00846257	0.0112675	0.022408	0.0251735	0.0470174	0.0251735	0.030681	0.0140645	0.0140645	0.00846257	0.022408	0.0140645	0.0140645	0.022408	0.0056497	0.0630785	0.0279311	0.0388839
METABOLISM OF XENOBIOTICS BY CYTOCHROME P450	70	278457	2.78547	1	-0.444898	0.941819	100	100	EPHX1 (0.61 %)	0.00282885	0.0056497	0.00846257	0.0112675	0.00282885	0.0762558	0.0814747	0.127138	0.0604206	0.0550821	0.0279311	0.00846257	0.102057	0.00846257	0.0969551	0.078869	0.022408	0.0168535	0.00846257	0.0140645	0.0630785	0.0056497	0.00846257	0.0112675	0.022408	0.0251735	0.0470174	0.0251735	0.030681	0.0140645	0.0140645	0.00846257	0.022408	0.0140645	0.0140645	0.022408	0.0056497	0.0630785	0.0279311	0.0388839
RIBOSOME	88	317415	2.78547	1	-0.444898	0.941819	100	100	RPSA (0.61 %)	0.00282885	0.0056497	0.00846257	0.0112675	0.00282885	0.0762558	0.0814747	0.127138	0.0604206	0.0550821	0.0279311	0.00846257	0.102057	0.00846257	0.0969551	0.078869	0.022408	0.0168535	0.00846257	0.0140645	0.0630785	0.0056497	0.00846257	0.0112675	0.022408	0.0251735	0.0470174	0.0251735	0.030681	0.0140645	0.0140645	0.00846257	0.022408	0.0140645	0.0140645	0.022408	0.0056497	0.0630785	0.0279311	0.0388839
BASE EXCISION REPAIR	35	158471	2.78547	1	-0.444898	0.941819	100	100	XRCC1 (0.61 %)	0.00282885	0.0056497	0.00846257	0.0112675	0.00282885	0.0762558	0.0814747	0.127138	0.0604206	0.0550821	0.0279311	0.00846257	0.102057	0.00846257	0.0969551	0.078869	0.022408	0.0168535	0.00846257	0.0140645	0.0630785	0.0056497	0.00846257	0.0112675	0.022408	0.0251735	0.0470174	0.0251735	0.030681	0.0140645	0.0140645	0.00846257	0.022408	0.0140645	0.0140645	0.022408	0.0056497	0.0630785	0.0279311	0.0388839
LYSOSOME	121	727736	2.78547	1	-0.444898	0.941819	100	100	HYAL1 (0.61 %)	0.00282885	0.0056497	0.00846257	0.0112675	0.00282885	0.0762558	0.0814747	0.127138	0.0604206	0.0550821	0.0279311	0.00846257	0.102057	0.00846257	0.0969551	0.078869	0.022408	0.0168535	0.00846257	0.0140645	0.0630785	0.0056497	0.00846257	0.0112675	0.022408	0.0251735	0.0470174	0.0251735	0.030681	0.0140645	0.0140645	0.00846257	0.022408	0.0140645	0.0140645	0.022408	0.0056497	0.0630785	0.0279311	0.0388839
PEROXISOME	78	396352	2.78547	1	-0.444898	0.941819	100	100	CROT (0.61 %)	0.00282885	0.0056497	0.00846257	0.0112675	0.00282885	0.0762558	0.0814747	0.127138	0.0604206	0.0550821	0.0279311	0.00846257	0.102057	0.00846257	0.0969551	0.078869	0.022408	0.0168535	0.00846257	0.0140645	0.0630785	0.0056497	0.00846257	0.0112675	0.022408	0.0251735	0.0470174	0.0251735	0.030681	0.0140645	0.0140645	0.00846257	0.022408	0.0140645	0.0140645	0.022408	0.0056497	0.0630785	0.0279311	0.0388839
CARDIAC MUSCLE CONTRACTION	80	367517	2.78547	1	-0.444898	0.941819	100	100	CACNA2D2 (0.61 %)	0.00282885	0.0056497	0.00846257	0.0112675	0.00282885	0.0762558	0.0814747	0.127138	0.0604206	0.0550821	0.0279311	0.00846257	0.102057	0.00846257	0.0969551	0.078869	0.022408	0.0168535	0.00846257	0.0140645	0.0630785	0.0056497	0.00846257	0.0112675	0.022408	0.0251735	0.0470174	0.0251735	0.030681	0.0140645	0.0140645	0.00846257	0.022408	0.0140645	0.0140645	0.022408	0.0056497	0.0630785	0.0279311	0.0388839
MATURITY ONSET DIABETES OF THE YOUNG	25	102563	2.78547	1	-0.444898	0.941819	100	100	GCK (0.61 %)	0.00282885	0.0056497	0.00846257	0.0112675	0.00282885	0.0762558	0.0814747	0.127138	0.0604206	0.0550821	0.0279311	0.00846257	0.102057	0.00846257	0.0969551	0.078869	0.022408	0.0168535	0.00846257	0.0140645	0.0630785	0.0056497	0.00846257	0.0112675	0.022408	0.0251735	0.0470174	0.0251735	0.030681	0.0140645	0.0140645	0.00846257	0.022408	0.0140645	0.0140645	0.022408	0.0056497	0.0630785	0.0279311	0.0388839
HYPERTROPHIC CARDIOMYOPATHY HCM	85	690202	2.78547	1	-0.444898	0.941819	100	100	CACNA2D2 (0.61 %)	0.00282885	0.0056497	0.00846257	0.0112675	0.00282885	0.0762558	0.0814747	0.127138	0.0604206	0.0550821	0.0279311	0.00846257	0.102057	0.00846257	0.0969551	0.078869	0.022408	0.0168535	0.00846257	0.0140645	0.0630785	0.0056497	0.00846257	0.0112675	0.022408	0.0251735	0.0470174	0.0251735	0.030681	0.0140645	0.0140645	0.00846257	0.022408	0.0140645	0.0140645	0.022408	0.0056497	0.0630785	0.0279311	0.0388839
CARM ER PATHWAY	35	275272	2.78547	1	-0.444898	0.941819	100	100	BRCA1 (0.61 %)	0.00282885	0.0056497	0.00846257	0.0112675	0.00282885	0.0762558	0.0814747	0.127138	0.0604206	0.0550821	0.0279311	0.00846257	0.102057	0.00846257	0.0969551	0.078869	0.022408	0.0168535	0.00846257	0.0140645	0.0630785	0.0056497	0.00846257	0.0112675	0.022408	0.0251735	0.0470174	0.0251735	0.030681	0.0140645	0.0140645	0.00846257	0.022408	0.0140645	0.0140645	0.022408	0.0056497	0.0630785	0.0279311	0.0388839
MCM PATHWAY	18	84598	2.78547	1	-0.444898	0.941819	100	100	CCNE1 (0.61 %)	0.00282885	0.0056497	0.00846257	0.0112675	0.00282885	0.0762558	0.0814747	0.127138	0.0604206	0.0550821	0.0279311	0.00846257	0.102057	0.00846257	0.0969551	0.078869	0.022408	0.0168535	0.00846257	0.0140645	0.0630785	0.0056497	0.00846257	0.0112675	0.022408	0.0251735	0.0470174	0.0251735	0.030681	0.0140645	0.0140645	0.00846257	0.022408	0.0140645	0.0140645	0.022408	0.0056497	0.0630785	0.0279311	0.0388839
FREE PATHWAY	10	41185	2.78547	1	-0.444898	0.941819	100	100	RELA (0.61 %)	0.00282885	0.0056497	0.00846257	0.0112675	0.00282885	0.0762558	0.0814747	0.127138	0.0604206	0.0550821	0.0279311	0.00846257	0.102057	0.00846257	0.0969551	0.078869	0.022408	0.0168535	0.00846257	0.0140645	0.0630785	0.0056497	0.00846257	0.0112675	0.022408	0.0251735	0.0470174	0.0251735	0.030681	0.0140645	0.0140645	0.00846257	0.022408	0.0140645	0.0140645	0.022408	0.0056497	0.0630785	0.0279311	0.0388839
GABA PATHWAY	10	65414	2.78547	1	-0.444898	0.941819	100	100	SRC (0.61 %)	0.00282885	0.0056497	0.00846257	0.0112675	0.00282885	0.0762558	0.0814747	0.127138	0.0604206	0.0550821	0.0279311	0.00846257	0.102057	0.00846257	0.0969551	0.078869	0.022408	0.0168535	0.00846257	0.0140645	0.0630785	0.0056497	0.00846257	0.0112675	0.022408	0.0251735	0.0470174	0.0251735	0.030681	0.0140645	0.0140645	0.00846257	0.022408	0.0140645	0.0140645	0.022408	0.0056497	0.0630785	0.0279311	0.0388839
HIF PATHWAY	15	109755	2.78547	1	-0.444898	0.941819	100	100	VHL (0.61 %)	0.00282885	0.0056497	0.00846257	0.0112675	0.00282885	0.0762558	0.0814747	0.127138	0.0604206	0.0550821	0.0279311	0.00846257	0.102057	0.00846257	0.0969551	0.078869	0.022408	0.0168535	0.00846257	0.0140645	0.0630785	0.0056497	0.00846257	0.0112675	0.022408	0.0251735	0.0470174	0.0251735	0.030681	0.0140645	0.0140645	0.00846257	0.022408	0.0140645	0.0140645	0.022408	0.0056497	0.0630785	0.0279311	0.0388839
MITOCHONDRIA PATHWAY	21	100536	2.78547	1	-0.444898	0.941819	100	100	BAX (0.61 %)	0.00282885	0.0056497	0.00846257	0.0112675	0.00282885	0.0762558	0.0814747	0.127138	0.0604206	0.0550821	0.0279311	0.00846257	0.102057	0.00846257	0.0969551	0.078869	0.022408	0.0168535	0.00846257	0.0140645	0.0630785	0.0056497	0.00846257	0.0112675	0.022408	0.0251735	0.0470174	0.0251735	0.030681	0.0140645	0.0140645	0.00846257	0.022408	0.0140645	0.0140645	0.022408	0.0056497	0.0630785	0.0279311	0.0388839
RANMS PATHWAY	10	56543	2.78547	1	-0.444898	0.941819	100	100	AURKA (0.61 %)	0.00282885	0.0056497	0.00846257	0.0112675	0.00282885	0.0762558	0.0814747	0.127138	0.0604206	0.0550821	0.0279311	0.00846257	0.102057	0.00846257	0.0969551	0.078869	0.022408	0.0168535	0.00846257	0.0140645	0.0630785	0.0056497	0.00846257	0.0112675	0.022408	0.0251735	0.0470174	0.0251735	0.030681	0.0140645	0.0140645	0.00846257	0.022408	0.0140645	0.0140645	0.022408	0.0056497	0.0630785	0.0279311	0.0388839
SODD PATHWAY	10	51938	2.78547	1	-0.444898	0.941819	100	100	RIPK1 (0.61 %)	0.00282885	0.0056497	0.00846257	0.0112675	0.00282885	0.0762558	0.0814747	0.127138	0.0604206	0.0550821	0.0279311	0.00846257	0.102057	0.00846257	0.0969551	0.078869	0.022408	0.0168535	0.00846257	0.0140645	0.0630785	0.0056497	0.00846257	0.0112675	0.022408	0.0251735	0.0470174	0.0251735	0.030681	0.0140645	0.0140645	0.00846257	0.022408	0.0140645	0.0140645	0.022408	0.0056497	0.0630785	0.0279311	0.0388839
PROGRAMMED CELL DEATH	12	62386	2.78547	1	-0.444898	0.941819	100	100	BAX (0.61 %)	0.00282885	0.0056497	0.00846257	0.0112675	0.00282885	0.0762558	0.0814747	0.127138	0.0604206	0.0550821	0.0279311	0.00846257	0.102057	0.00846257	0.0969551	0.078869	0.022408	0.0168535	0.00846257	0.0140645	0.0630785	0.0056497	0.00846257	0.0112675	0.022408	0.0251735	0.0470174	0.0251735	0.030681	0.0140645	0.0140645	0.00846257	0.022408	0.0140645	0.0140645	0.022408	0.0056497	0.0630785	0.0279311	0.0388839
S1P S1P4 PATHWAY	14	99551	2.78547	1	-0.444898	0.941819	100	100	PLCG1 (0.61 %)	0.00282885	0.0056497	0.00846257	0.0112675	0.00282885	0.0762558	0.0814747	0.127138	0.0604206	0.0550821	0.0279311	0.00846257	0.102057	0.00846257	0.0969551	0.078869	0.022408	0.0168535	0.00846257	0.0140645	0.0630785	0.0056497	0.00846257	0.0112675	0.022408	0.0251735	0.0470174	0.0251735	0.030681	0.0140645	0.0140645	0.00846257	0.022408	0.0140645	0.0140645	0.022408	0.0056497	0.0630785	0.0279311	0.0388839
THROMBIN PAR4 PATHWAY	15	78109	2.78547	1	-0.444898	0.941819	100	100	ROCK1 (0.61 %)	0.00282885	0.0056497	0.00846257	0.0112675	0.00282885	0.0762558	0.0814747	0.127138	0.0604206	0.0550821	0.0279311	0.00846257	0.102057	0.00846257	0.0969551	0.078869	0.022408	0.0168535	0.00846257	0.0140645	0.0630785	0.0056497	0.00846257	0.0112675	0.022408	0.0251735	0.0470174	0.0251735	0.030681	0.0140645	0.0140645	0.00846257	0.022408	0.0140645	0.0140645	0.022408	0.0056497	0.0630785	0.0279311	0.0388839
P38 GAMMA DELTA PATHWAY	11	96398	2.78547	1	-0.444898	0.941819	100	100	MAP2K6 (0.61 %)	0.00282885	0.0056497	0.00846257	0.0112675	0.00282885	0.0762558	0.0814747	0.127138	0.0604206	0.0550821	0.0279311	0.00846257	0.102057	0.00846257	0.0969551	0.078869	0.022408	0.0168535	0.00846257	0.0140645	0.0630785	0.0056497	0.00846257	0.0112675	0.022408	0.0251735	0.0470174	0.0251735	0.030681	0.0140645	0.0140645	0.00846257	0.022408	0.0140645	0.0140645	0.022408	0.0056497	0.0630785	0.0279311	0.0388839
INTEGRIN5 PATHWAY	17	119091	2.78547	1	-0.444898	0.941819	100	100	TGFBR1 (0.61 %)	0.00282885	0.0056497	0.00846257	0.0112675	0.00282885	0.0762558	0.0814747	0.127138	0.0604206	0.0550821	0.0279311	0.00846257	0.102057	0.00846257	0.0969551	0.078869	0.022408	0.0168535	0.00846257	0.0140645	0.0630785	0.0056497	0.00846257	0.0112675	0.022408	0.0251735	0.0470174	0.0251735	0.030681	0.0140645	0.0140645	0.00846257	0.022408	0.0140645	0.0140645	0.022408	0.0056497	0.0630785	0.0279311	0.0388839
ANTHRAX PATHWAY	17	118794	2.78547	1	-0.444898	0.941819	100	100	MAP2K6 (0.61 %)	0.00282885	0.0056497	0.00846257	0.0112675	0.00282885	0.0762558	0.0814747	0.127138	0.0604206	0.0550821	0.0279311	0.00846257	0.102057	0.00846257	0.0969551	0.078869	0.022408	0.0168535	0.00846257	0.0140645	0.0630785	0.0056497	0.00846257	0.0112675	0.022408	0.0251735	0.0470174	0.0251735	0.030681	0.0140645	0.0140645	0.00846257	0.022408	0.0140645	0.0140645	0.022408	0.0056497	0.0630785	0.0279311	0.0388839
EXTRINSIC PATHWAY FOR APOPTOSIS	13	80179	2.78547	1	-0.444898	0.941819	100	100	RIPK1 (0.61 %)	0.00282885	0.0056497	0.00846257	0.0112675	0.00282885	0.0762558	0.0814747	0.127138	0.0604206	0.0550821	0.0279311	0.00846257	0.102057	0.00846257	0.0969551	0.078869	0.022408	0.0168535	0.00846257	0.0140645	0.0630785	0.0056497	0.00846257	0.0112675	0.022408	0.0251735	0.0470174	0.0251735	0.030681	0.0140645	0.0140645	0.00846257	0.022408	0.0140645	0.0140645	0.022408	0.0056497	0.0630785	0.0279311	0.0388839
FORMATION OF THE TERNARY COMPLEX AND SUBSEQUENTLY THE 43S COMPLEX	74	201594	2.78547	1	-0.444898	0.941819	100	100	RPSA (0.61 %)	0.00282885	0.0056497	0.00846257	0.0112675	0.00282885	0.0762558	0.0814747	0.127138	0.0604206	0.0550821	0.0279311	0.00846257	0.102057	0.00846257	0.0969551	0.078869	0.022408	0.0168535	0.00846257	0.0140645	0.0630785	0.0056497	0.00846257	0.0112675	0.022408	0.0251735	0.0470174	0.0251735	0.030681	0.0140645	0.0140645	0.00846257	0.022408	0.0140645	0.0140645	0.022408	0.0056497	0.0630785	0.0279311	0.0388839
BASE EXCISION REPAIR	19	82833	2.78547	1	-0.444898	0.941819	100	100	XRCC1 (0.61 %)	0.00282885	0.0056497	0.00846257	0.0112675	0.00282885	0.0762558	0.0814747	0.127138	0.0604206	0.0550821	0.0279311	0.00846257	0.102057	0.00846257	0.0969551	0.078869	0.022408	0.0168535	0.00846257	0.0140645	0.0630785	0.0056497	0.00846257	0.0112675	0.022408	0.0251735	0.0470174	0.0251735	0.030681	0.0140645	0.0140645	0.00846257	0.022408	0.0140645	0.0140645	0.022408	0.0056497	0.0630785	0.0279311	0.0388839
NEF MEDIATES DOWN MODULATION OF CELL SURFACE RECEPTORS BY RECRUITING THEM TO CLATHRIN ADAPTERS	21	140390	2.78547	1	-0.444898	0.941819	100	100	LCK (0.61 %)	0.00282885	0.0056497	0.00846257	0.0112675	0.00282885	0.0762558	0.0814747	0.127138	0.0604206	0.0550821	0.0279311	0.00846257	0.102057	0.00846257	0.0969551	0.078869	0.022408	0.0168535	0.00846257	0.0140645	0.0630785	0.0056497	0.00846257	0.0112675	0.022408	0.0251735	0.0470174	0.0251735	0.030681	0.0140645	0.0140645	0.00846257	0.022408	0.0140645	0.0140645	0.022408	0.0056497	0.0630785	0.0279311	0.0388839
SPHINGOLIPID DE NOVO BIOSYNTHESIS	31	165732	2.78547	1	-0.444898	0.941819	100	100	PRKD1 (0.61 %)	0.00282885	0.0056497	0.00846257	0.0112675	0.00282885	0.0762558	0.0814747	0.127138	0.0604206	0.0550821	0.0279311	0.00846257	0.102057	0.00846257	0.0969551	0.078869	0.022408	0.0168535	0.00846257	0.0140645	0.0630785	0.0056497	0.00846257	0.0112675	0.022408	0.0251735	0.0470174	0.0251735	0.030681	0.0140645	0.0140645	0.00846257	0.022408	0.0140645	0.0140645	0.022408	0.0056497	0.0630785	0.0279311	0.0388839
SRP DEPENDENT COTRANSLATIONAL PROTEIN TARGETING TO MEMBRANE	179	432224	2.78547	1	-0.444898	0.941819	100	100	RPSA (0.61 %)	0.00282885	0.0056497	0.00846257	0.0112675	0.00282885	0.0762558	0.0814747	0.127138	0.0604206	0.0550821	0.0279311	0.00846257	0.102057	0.00846257	0.0969551	0.078869	0.022408	0.0168535	0.00846257	0.0140645	0.0630785	0.0056497	0.00846257	0.0112675	0.022408	0.0251735	0.0470174	0.0251735	0.030681	0.0140645	0.0140645	0.00846257	0.022408	0.0140645	0.0140645	0.022408	0.0056497	0.0630785	0.0279311	0.0388839
HS GAG DEGRADATION	20	114787	2.78547	1	-0.444898	0.941819	100	100	GPC3 (0.61 %)	0.00282885	0.0056497	0.00846257	0.0112675	0.00282885	0.0762558	0.0814747	0.127138	0.0604206	0.0550821	0.0279311	0.00846257	0.102057	0.00846257	0.0969551	0.078869	0.022408	0.0168535	0.00846257	0.0140645	0.0630785	0.0056497	0.00846257	0.0112675	0.022408	0.0251735	0.0470174	0.0251735	0.030681	0.0140645	0.0140645	0.00846257	0.022408	0.0140645	0.0140645	0.022408	0.0056497	0.0630785	0.0279311	0.0388839
REGULATION OF HYPOXIA INDUCIBLE FACTOR HIF BY OXYGEN	25	150917	2.78547	1	-0.444898	0.941819	100	100	VHL (0.61 %)	0.00282885	0.0056497	0.00846257	0.0112675	0.00282885	0.0762558	0.0814747	0.127138	0.0604206	0.0550821	0.0279311	0.00846257	0.102057	0.00846257	0.0969551	0.078869	0.022408	0.0168535	0.00846257	0.0140645	0.0630785	0.0056497	0.00846257	0.0112675	0.022408	0.0251735	0.0470174	0.0251735	0.030681	0.0140645	0.0140645	0.00846257	0.022408	0.0140645	0.0140645	0.022408	0.0056497	0.0630785	0.0279311	0.0388839
CS DS DEGRADATION	12	91548	2.78547	1	-0.444898	0.941819	100	100	HYAL1 (0.61 %)	0.00282885	0.0056497	0.00846257	0.0112675	0.00282885	0.0762558	0.0814747	0.127138	0.0604206	0.0550821	0.0279311	0.00846257	0.102057	0.00846257	0.0969551	0.078869	0.022408	0.0168535	0.00846257	0.0140645	0.0630785	0.0056497	0.00846257	0.0112675	0.022408	0.0251735	0.0470174	0.0251735	0.030681	0.0140645	0.0140645	0.00846257	0.022408	0.0140645	0.0140645	0.022408	0.0056497	0.0630785	0.0279311	0.0388839
OXYGEN DEPENDENT PROLINE HYDROXYLATION OF HYPOXIA INDUCIBLE FACTOR ALPHA	18	85434	2.78547	1	-0.444898	0.941819	100	100	VHL (0.61 %)	0.00282885	0.0056497	0.00846257	0.0112675	0.00282885	0.0762558	0.0814747	0.127138	0.0604206	0.0550821	0.0279311	0.00846257	0.102057	0.00846257	0.0969551	0.078869	0.022408	0.0168535	0.00846257	0.0140645	0.0630785	0.0056497	0.00846257	0.0112675	0.022408	0.0251735	0.0470174	0.0251735	0.030681	0.0140645	0.0140645	0.00846257	0.022408	0.0140645	0.0140645	0.022408	0.0056497	0.0630785	0.0279311	0.0388839
HYALURONAN UPTAKE AND DEGRADATION	10	62117	2.78547	1	-0.444898	0.941819	100	100	HYAL1 (0.61 %)	0.00282885	0.0056497	0.00846257	0.0112675	0.00282885	0.0762558	0.0814747	0.127138	0.0604206	0.0550821	0.0279311	0.00846257	0.102057	0.00846257	0.0969551	0.078869	0.022408	0.0168535	0.00846257	0.0140645	0.0630785	0.0056497	0.00846257	0.0112675	0.022408	0.0251735	0.0470174	0.0251735	0.030681	0.0140645	0.0140645	0.00846257	0.022408	0.0140645	0.0140645	0.022408	0.0056497	0.0630785	0.0279311	0.0388839
HYALURONAN METABOLISM	14	85278	2.78547	1	-0.444898	0.941819	100	100	HYAL1 (0.61 %)	0.00282885	0.0056497	0.00846257	0.0112675	0.00282885	0.0762558	0.0814747	0.127138	0.0604206	0.0550821	0.0279311	0.00846257	0.102057	0.00846257	0.0969551	0.078869	0.022408	0.0168535	0.00846257	0.0140645	0.0630785	0.0056497	0.00846257	0.0112675	0.022408	0.0251735	0.0470174	0.0251735	0.030681	0.0140645	0.0140645	0.00846257	0.022408	0.0140645	0.0140645	0.022408	0.0056497	0.0630785	0.0279311	0.0388839
LATENT INFECTION OF HOMO SAPIENS WITH MYCOBACTERIUM TUBERCULOSIS	33	148028	2.78547	1	-0.444898	0.941819	100	100	LTF (0.61 %)	0.00282885	0.0056497	0.00846257	0.0112675	0.00282885	0.0762558	0.0814747	0.127138	0.0604206	0.0550821	0.0279311	0.00846257	0.102057	0.00846257	0.0969551	0.078869	0.022408	0.0168535	0.00846257	0.0140645	0.0630785	0.0056497	0.00846257	0.0112675	0.022408	0.0251735	0.0470174	0.0251735	0.030681	0.0140645	0.0140645	0.00846257	0.022408	0.0140645	0.0140645	0.022408	0.0056497	0.0630785	0.0279311	0.0388839
HS GAG BIOSYNTHESIS	31	174327	2.78547	1	-0.444898	0.941819	100	100	GPC3 (0.61 %)	0.00282885	0.0056497	0.00846257	0.0112675	0.00282885	0.0762558	0.0814747	0.127138	0.0604206	0.0550821	0.0279311	0.00846257	0.102057	0.00846257	0.0969551	0.078869	0.022408	0.0168535	0.00846257	0.0140645	0.0630785	0.0056497	0.00846257	0.0112675	0.022408	0.0251735	0.0470174	0.0251735	0.030681	0.0140645	0.0140645	0.00846257	0.022408	0.0140645	0.0140645	0.022408	0.0056497	0.0630785	0.0279311	0.0388839
HEPARAN SULFATE HEPARIN HS GAG METABOLISM	52	304377	2.78547	1	-0.444898	0.941819	100	100	GPC3 (0.61 %)	0.00282885	0.0056497	0.00846257	0.0112675	0.00282885	0.0762558	0.0814747	0.127138	0.0604206	0.0550821	0.0279311	0.00846257	0.102057	0.00846257	0.0969551	0.078869	0.022408	0.0168535	0.00846257	0.0140645	0.0630785	0.0056497	0.00846257	0.0112675	0.022408	0.0251735	0.0470174	0.0251735	0.030681	0.0140645	0.0140645	0.00846257	0.022408	0.0140645	0.0140645	0.022408	0.0056497	0.0630785	0.0279311	0.0388839
A TETRASACCHARIDE LINKER SEQUENCE IS REQUIRED FOR GAG SYNTHESIS	25	163823	2.78547	1	-0.444898	0.941819	100	100	GPC3 (0.61 %)	0.00282885	0.0056497	0.00846257	0.0112675	0.00282885	0.0762558	0.0814747	0.127138	0.0604206	0.0550821	0.0279311	0.00846257	0.102057	0.00846257	0.0969551	0.078869	0.022408	0.0168535	0.00846257	0.0140645	0.0630785	0.0056497	0.00846257	0.0112675	0.022408	0.0251735	0.0470174	0.0251735	0.030681	0.0140645	0.0140645	0.00846257	0.022408	0.0140645	0.0140645	0.022408	0.0056497	0.0630785	0.0279311	0.0388839
ERKS ARE INACTIVATED	12	70398	2.78547	1	-0.444898	0.941819	100	100	MAPK7 (0.61 %)	0.00282885	0.0056497	0.00846257	0.0112675	0.00282885	0.0762558	0.0814747	0.127138	0.0604206	0.0550821	0.0279311	0.00846257	0.102057	0.00846257	0.0969551	0.078869	0.022408	0.0168535	0.00846257	0.0140645	0.0630785	0.0056497	0.00846257	0.0112675	0.022408	0.0251735	0.0470174	0.0251735	0.030681	0.0140645	0.0140645	0.00846257	0.022408	0.0140645	0.0140645	0.022408	0.0056497	0.0630785	0.0279311	0.0388839
PROCESSING OF CAPPED INTRON CONTAINING PRE MRNA	140	772616	2.78547	1	-0.444898	0.941819	100	100	RBM5 (0.61 %)	0.00282885	0.0056497	0.00846257	0.0112675	0.00282885	0.0762558	0.0814747	0.127138	0.0604206	0.0550821	0.0279311	0.00846257	0.102057	0.00846257	0.0969551	0.078869	0.022408	0.0168535	0.00846257	0.0140645	0.0630785	0.0056497	0.00846257	0.0112675	0.022408	0.0251735	0.0470174	0.0251735	0.030681	0.0140645	0.0140645	0.00846257	0.022408	0.0140645	0.0140645	0.022408	0.0056497	0.0630785	0.0279311	0.0388839
REGULATION OF PYRUVATE DEHYDROGENASE PDH COMPLEX	13	75030	2.78547	1	-0.444898	0.941819	100	100	PDK1 (0.61 %)	0.00282885	0.0056497	0.00846257	0.0112675	0.00282885	0.0762558	0.0814747	0.127138	0.0604206	0.0550821	0.0279311	0.00846257	0.102057	0.00846257	0.0969551	0.078869	0.022408	0.0168535	0.00846257	0.0140645	0.0630785	0.0056497	0.00846257	0.0112675	0.022408	0.0251735	0.0470174	0.0251735	0.030681	0.0140645	0.0140645	0.00846257	0.022408	0.0140645	0.0140645	0.022408	0.0056497	0.0630785	0.0279311	0.0388839
PHOSPHORYLATION OF CD3 AND TCR ZETA CHAINS	16	187881	2.78547	1	-0.444898	0.941819	100	100	LCK (0.61 %)	0.00282885	0.0056497	0.00846257	0.0112675	0.00282885	0.0762558	0.0814747	0.127138	0.0604206	0.0550821	0.0279311	0.00846257	0.102057	0.00846257	0.0969551	0.078869	0.022408	0.0168535	0.00846257	0.0140645	0.0630785	0.0056497	0.00846257	0.0112675	0.022408	0.0251735	0.0470174	0.0251735	0.030681	0.0140645	0.0140645	0.00846257	0.022408	0.0140645	0.0140645	0.022408	0.0056497	0.0630785	0.0279311	0.0388839
REGULATED PROTEOLYSIS OF P75NTR	10	48662	2.78547	1	-0.444898	0.941819	100	100	RELA (0.61 %)	0.00282885	0.0056497	0.00846257	0.0112675	0.00282885	0.0762558	0.0814747	0.127138	0.0604206	0.0550821	0.0279311	0.00846257	0.102057	0.00846257	0.0969551	0.078869	0.022408	0.0168535	0.00846257	0.0140645	0.0630785	0.0056497	0.00846257	0.0112675	0.022408	0.0251735	0.0470174	0.0251735	0.030681	0.0140645	0.0140645	0.00846257	0.022408	0.0140645	0.0140645	0.022408	0.0056497	0.0630785	0.0279311	0.0388839
NRIF SIGNALS CELL DEATH FROM THE NUCLEUS	15	68932	2.78547	1	-0.444898	0.941819	100	100	MAPK8 (0.61 %)	0.00282885	0.0056497	0.00846257	0.0112675	0.00282885	0.0762558	0.0814747	0.127138	0.0604206	0.0550821	0.0279311	0.00846257	0.102057	0.00846257	0.0969551	0.078869	0.022408	0.0168535	0.00846257	0.0140645	0.0630785	0.0056497	0.00846257	0.0112675	0.022408	0.0251735	0.0470174	0.0251735	0.030681	0.0140645	0.0140645	0.00846257	0.022408	0.0140645	0.0140645	0.022408	0.0056497	0.0630785	0.0279311	0.0388839
PEPTIDE CHAIN ELONGATION	153	332351	2.78547	1	-0.444898	0.941819	100	100	RPSA (0.61 %)	0.00282885	0.0056497	0.00846257	0.0112675	0.00282885	0.0762558	0.0814747	0.127138	0.0604206	0.0550821	0.0279311	0.00846257	0.102057	0.00846257	0.0969551	0.078869	0.022408	0.0168535	0.00846257	0.0140645	0.0630785	0.0056497	0.00846257	0.0112675	0.022408	0.0251735	0.0470174	0.0251735	0.030681	0.0140645	0.0140645	0.00846257	0.022408	0.0140645	0.0140645	0.022408	0.0056497	0.0630785	0.0279311	0.0388839
RECRUITMENT OF MITOTIC CENTROSOME PROTEINS AND COMPLEXES	66	464240	2.78547	1	-0.444898	0.941819	100	100	PRKACA (0.61 %)	0.00282885	0.0056497	0.00846257	0.0112675	0.00282885	0.0762558	0.0814747	0.127138	0.0604206	0.0550821	0.0279311	0.00846257	0.102057	0.00846257	0.0969551	0.078869	0.022408	0.0168535	0.00846257	0.0140645	0.0630785	0.0056497	0.00846257	0.0112675	0.022408	0.0251735	0.0470174	0.0251735	0.030681	0.0140645	0.0140645	0.00846257	0.022408	0.0140645	0.0140645	0.022408	0.0056497	0.0630785	0.0279311	0.0388839
LOSS OF NLP FROM MITOTIC CENTROSOMES	59	411450	2.78547	1	-0.444898	0.941819	100	100	PRKACA (0.61 %)	0.00282885	0.0056497	0.00846257	0.0112675	0.00282885	0.0762558	0.0814747	0.127138	0.0604206	0.0550821	0.0279311	0.00846257	0.102057	0.00846257	0.0969551	0.078869	0.022408	0.0168535	0.00846257	0.0140645	0.0630785	0.0056497	0.00846257	0.0112675	0.022408	0.0251735	0.0470174	0.0251735	0.030681	0.0140645	0.0140645	0.00846257	0.022408	0.0140645	0.0140645	0.022408	0.0056497	0.0630785	0.0279311	0.0388839
PEROXISOMAL LIPID METABOLISM	21	104869	2.78547	1	-0.444898	0.941819	100	100	CROT (0.61 %)	0.00282885	0.0056497	0.00846257	0.0112675	0.00282885	0.0762558	0.0814747	0.127138	0.0604206	0.0550821	0.0279311	0.00846257	0.102057	0.00846257	0.0969551	0.078869	0.022408	0.0168535	0.00846257	0.0140645	0.0630785	0.0056497	0.00846257	0.0112675	0.022408	0.0251735	0.0470174	0.0251735	0.030681	0.0140645	0.0140645	0.00846257	0.022408	0.0140645	0.0140645	0.022408	0.0056497	0.0630785	0.0279311	0.0388839
MRNA SPLICING	111	566561	2.78547	1	-0.444898	0.941819	100	100	RBM5 (0.61 %)	0.00282885	0.0056497	0.00846257	0.0112675	0.00282885	0.0762558	0.0814747	0.127138	0.0604206	0.0550821	0.0279311	0.00846257	0.102057	0.00846257	0.0969551	0.078869	0.022408	0.0168535	0.00846257	0.0140645	0.0630785	0.0056497	0.00846257	0.0112675	0.022408	0.0251735	0.0470174	0.0251735	0.030681	0.0140645	0.0140645	0.00846257	0.022408	0.0140645	0.0140645	0.022408	0.0056497	0.0630785	0.0279311	0.0388839
ADP SIGNALLING THROUGH P2RY1	25	107058	2.78547	1	-0.444898	0.941819	100	100	SRC (0.61 %)	0.00282885	0.0056497	0.00846257	0.0112675	0.00282885	0.0762558	0.0814747	0.127138	0.0604206	0.0550821	0.0279311	0.00846257	0.102057	0.00846257	0.0969551	0.078869	0.022408	0.0168535	0.00846257	0.0140645	0.0630785	0.0056497	0.00846257	0.0112675	0.022408	0.0251735	0.0470174	0.0251735	0.030681	0.0140645	0.0140645	0.00846257	0.022408	0.0140645	0.0140645	0.022408	0.0056497	0.0630785	0.0279311	0.0388839
SPHINGOLIPID METABOLISM	69	374474	2.78547	1	-0.444898	0.941819	100	100	PRKD1 (0.61 %)	0.00282885	0.0056497	0.00846257	0.0112675	0.00282885	0.0762558	0.0814747	0.127138	0.0604206	0.0550821	0.0279311	0.00846257	0.102057	0.00846257	0.0969551	0.078869	0.022408	0.0168535	0.00846257	0.0140645	0.0630785	0.0056497	0.00846257	0.0112675	0.022408	0.0251735	0.0470174	0.0251735	0.030681	0.0140645	0.0140645	0.00846257	0.022408	0.0140645	0.0140645	0.022408	0.0056497	0.0630785	0.0279311	0.0388839
PD1 SIGNALING	18	177228	2.78547	1	-0.444898	0.941819	100	100	LCK (0.61 %)	0.00282885	0.0056497	0.00846257	0.0112675	0.00282885	0.0762558	0.0814747	0.127138	0.0604206	0.0550821	0.0279311	0.00846257	0.102057	0.00846257	0.0969551	0.078869	0.022408	0.0168535	0.00846257	0.0140645	0.0630785	0.0056497	0.00846257	0.0112675	0.022408	0.0251735	0.0470174	0.0251735	0.030681	0.0140645	0.0140645	0.00846257	0.022408	0.0140645	0.0140645	0.022408	0.0056497	0.0630785	0.0279311	0.0388839
TIGHT JUNCTION INTERACTIONS	29	112834	2.78547	1	-0.444898	0.941819	100	100	PRKCI (0.61 %)	0.00282885	0.0056497	0.00846257	0.0112675	0.00282885	0.0762558	0.0814747	0.127138	0.0604206	0.0550821	0.0279311	0.00846257	0.102057	0.00846257	0.0969551	0.078869	0.022408	0.0168535	0.00846257	0.0140645	0.0630785	0.0056497	0.00846257	0.0112675	0.022408	0.0251735	0.0470174	0.0251735	0.030681	0.0140645	0.0140645	0.00846257	0.022408	0.0140645	0.0140645	0.022408	0.0056497	0.0630785	0.0279311	0.0388839
SIGNAL AMPLIFICATION	31	156185	2.78547	1	-0.444898	0.941819	100	100	SRC (0.61 %)	0.00282885	0.0056497	0.00846257	0.0112675	0.00282885	0.0762558	0.0814747	0.127138	0.0604206	0.0550821	0.0279311	0.00846257	0.102057	0.00846257	0.0969551	0.078869	0.022408	0.0168535	0.00846257	0.0140645	0.0630785	0.0056497	0.00846257	0.0112675	0.022408	0.0251735	0.0470174	0.0251735	0.030681	0.0140645	0.0140645	0.00846257	0.022408	0.0140645	0.0140645	0.022408	0.0056497	0.0630785	0.0279311	0.0388839
RAS ACTIVATION UOPN CA2 INFUX THROUGH NMDA RECEPTOR	17	157432	2.78547	1	-0.444898	0.941819	100	100	HRAS (0.61 %)	0.00282885	0.0056497	0.00846257	0.0112675	0.00282885	0.0762558	0.0814747	0.127138	0.0604206	0.0550821	0.0279311	0.00846257	0.102057	0.00846257	0.0969551	0.078869	0.022408	0.0168535	0.00846257	0.0140645	0.0630785	0.0056497	0.00846257	0.0112675	0.022408	0.0251735	0.0470174	0.0251735	0.030681	0.0140645	0.0140645	0.00846257	0.022408	0.0140645	0.0140645	0.022408	0.0056497	0.0630785	0.0279311	0.0388839
PYRUVATE METABOLISM	19	104563	2.78547	1	-0.444898	0.941819	100	100	PDK1 (0.61 %)	0.00282885	0.0056497	0.00846257	0.0112675	0.00282885	0.0762558	0.0814747	0.127138	0.0604206	0.0550821	0.0279311	0.00846257	0.102057	0.00846257	0.0969551	0.078869	0.022408	0.0168535	0.00846257	0.0140645	0.0630785	0.0056497	0.00846257	0.0112675	0.022408	0.0251735	0.0470174	0.0251735	0.030681	0.0140645	0.0140645	0.00846257	0.022408	0.0140645	0.0140645	0.022408	0.0056497	0.0630785	0.0279311	0.0388839
GLUCOSE TRANSPORT	38	239396	2.78547	1	-0.444898	0.941819	100	100	GCK (0.61 %)	0.00282885	0.0056497	0.00846257	0.0112675	0.00282885	0.0762558	0.0814747	0.127138	0.0604206	0.0550821	0.0279311	0.00846257	0.102057	0.00846257	0.0969551	0.078869	0.022408	0.0168535	0.00846257	0.0140645	0.0630785	0.0056497	0.00846257	0.0112675	0.022408	0.0251735	0.0470174	0.0251735	0.030681	0.0140645	0.0140645	0.00846257	0.022408	0.0140645	0.0140645	0.022408	0.0056497	0.0630785	0.0279311	0.0388839
THROMBIN SIGNALLING THROUGH PROTEINASE ACTIVATED RECEPTORS PARS	32	140523	2.78547	1	-0.444898	0.941819	100	100	SRC (0.61 %)	0.00282885	0.0056497	0.00846257	0.0112675	0.00282885	0.0762558	0.0814747	0.127138	0.0604206	0.0550821	0.0279311	0.00846257	0.102057	0.00846257	0.0969551	0.078869	0.022408	0.0168535	0.00846257	0.0140645	0.0630785	0.0056497	0.00846257	0.0112675	0.022408	0.0251735	0.0470174	0.0251735	0.030681	0.0140645	0.0140645	0.00846257	0.022408	0.0140645	0.0140645	0.022408	0.0056497	0.0630785	0.0279311	0.0388839
ROLE OF SECOND MESSENGERS IN NETRIN1 SIGNALING	11	57099	2.78547	1	-0.444898	0.941819	100	100	PLCG1 (0.61 %)	0.00282885	0.0056497	0.00846257	0.0112675	0.00282885	0.0762558	0.0814747	0.127138	0.0604206	0.0550821	0.0279311	0.00846257	0.102057	0.00846257	0.0969551	0.078869	0.022408	0.0168535	0.00846257	0.0140645	0.0630785	0.0056497	0.00846257	0.0112675	0.022408	0.0251735	0.0470174	0.0251735	0.030681	0.0140645	0.0140645	0.00846257	0.022408	0.0140645	0.0140645	0.022408	0.0056497	0.0630785	0.0279311	0.0388839
CGMP EFFECTS	19	138995	2.78547	1	-0.444898	0.941819	100	100	PRKG1 (0.61 %)	0.00282885	0.0056497	0.00846257	0.0112675	0.00282885	0.0762558	0.0814747	0.127138	0.0604206	0.0550821	0.0279311	0.00846257	0.102057	0.00846257	0.0969551	0.078869	0.022408	0.0168535	0.00846257	0.0140645	0.0630785	0.0056497	0.00846257	0.0112675	0.022408	0.0251735	0.0470174	0.0251735	0.030681	0.0140645	0.0140645	0.00846257	0.022408	0.0140645	0.0140645	0.022408	0.0056497	0.0630785	0.0279311	0.0388839
NITRIC OXIDE STIMULATES GUANYLATE CYCLASE	25	188088	2.78547	1	-0.444898	0.941819	100	100	PRKG1 (0.61 %)	0.00282885	0.0056497	0.00846257	0.0112675	0.00282885	0.0762558	0.0814747	0.127138	0.0604206	0.0550821	0.0279311	0.00846257	0.102057	0.00846257	0.0969551	0.078869	0.022408	0.0168535	0.00846257	0.0140645	0.0630785	0.0056497	0.00846257	0.0112675	0.022408	0.0251735	0.0470174	0.0251735	0.030681	0.0140645	0.0140645	0.00846257	0.022408	0.0140645	0.0140645	0.022408	0.0056497	0.0630785	0.0279311	0.0388839
TRAF6 MEDIATED IRF7 ACTIVATION	30	118827	2.78547	1	-0.444898	0.941819	100	100	IKBKE (0.61 %)	0.00282885	0.0056497	0.00846257	0.0112675	0.00282885	0.0762558	0.0814747	0.127138	0.0604206	0.0550821	0.0279311	0.00846257	0.102057	0.00846257	0.0969551	0.078869	0.022408	0.0168535	0.00846257	0.0140645	0.0630785	0.0056497	0.00846257	0.0112675	0.022408	0.0251735	0.0470174	0.0251735	0.030681	0.0140645	0.0140645	0.00846257	0.022408	0.0140645	0.0140645	0.022408	0.0056497	0.0630785	0.0279311	0.0388839
TRAF3 DEPENDENT IRF ACTIVATION PATHWAY	14	89377	2.78547	1	-0.444898	0.941819	100	100	IKBKE (0.61 %)	0.00282885	0.0056497	0.00846257	0.0112675	0.00282885	0.0762558	0.0814747	0.127138	0.0604206	0.0550821	0.0279311	0.00846257	0.102057	0.00846257	0.0969551	0.078869	0.022408	0.0168535	0.00846257	0.0140645	0.0630785	0.0056497	0.00846257	0.0112675	0.022408	0.0251735	0.0470174	0.0251735	0.030681	0.0140645	0.0140645	0.00846257	0.022408	0.0140645	0.0140645	0.022408	0.0056497	0.0630785	0.0279311	0.0388839
ACTIVATION OF IRF3 IRF7 MEDIATED BY TBK1 IKK EPSILON	14	51969	2.78547	1	-0.444898	0.941819	100	100	IKBKE (0.61 %)	0.00282885	0.0056497	0.00846257	0.0112675	0.00282885	0.0762558	0.0814747	0.127138	0.0604206	0.0550821	0.0279311	0.00846257	0.102057	0.00846257	0.0969551	0.078869	0.022408	0.0168535	0.00846257	0.0140645	0.0630785	0.0056497	0.00846257	0.0112675	0.022408	0.0251735	0.0470174	0.0251735	0.030681	0.0140645	0.0140645	0.00846257	0.022408	0.0140645	0.0140645	0.022408	0.0056497	0.0630785	0.0279311	0.0388839
NEGATIVE REGULATORS OF RIG I MDA5 SIGNALING	31	174063	2.78547	1	-0.444898	0.941819	100	100	IKBKE (0.61 %)	0.00282885	0.0056497	0.00846257	0.0112675	0.00282885	0.0762558	0.0814747	0.127138	0.0604206	0.0550821	0.0279311	0.00846257	0.102057	0.00846257	0.0969551	0.078869	0.022408	0.0168535	0.00846257	0.0140645	0.0630785	0.0056497	0.00846257	0.0112675	0.022408	0.0251735	0.0470174	0.0251735	0.030681	0.0140645	0.0140645	0.00846257	0.022408	0.0140645	0.0140645	0.022408	0.0056497	0.0630785	0.0279311	0.0388839
DSCAM INTERACTIONS	11	80366	2.78547	1	-0.444898	0.941819	100	100	MAPK8 (0.61 %)	0.00282885	0.0056497	0.00846257	0.0112675	0.00282885	0.0762558	0.0814747	0.127138	0.0604206	0.0550821	0.0279311	0.00846257	0.102057	0.00846257	0.0969551	0.078869	0.022408	0.0168535	0.00846257	0.0140645	0.0630785	0.0056497	0.00846257	0.0112675	0.022408	0.0251735	0.0470174	0.0251735	0.030681	0.0140645	0.0140645	0.00846257	0.022408	0.0140645	0.0140645	0.022408	0.0056497	0.0630785	0.0279311	0.0388839
TRANSCRIPTIONAL REGULATION OF WHITE ADIPOCYTE DIFFERENTIATION	72	436249	2.78547	1	-0.444898	0.941819	100	100	RELA (0.61 %)	0.00282885	0.0056497	0.00846257	0.0112675	0.00282885	0.0762558	0.0814747	0.127138	0.0604206	0.0550821	0.0279311	0.00846257	0.102057	0.00846257	0.0969551	0.078869	0.022408	0.0168535	0.00846257	0.0140645	0.0630785	0.0056497	0.00846257	0.0112675	0.022408	0.0251735	0.0470174	0.0251735	0.030681	0.0140645	0.0140645	0.00846257	0.022408	0.0140645	0.0140645	0.022408	0.0056497	0.0630785	0.0279311	0.0388839
INFLUENZA LIFE CYCLE	203	649743	2.78547	1	-0.444898	0.941819	100	100	RPSA (0.61 %)	0.00282885	0.0056497	0.00846257	0.0112675	0.00282885	0.0762558	0.0814747	0.127138	0.0604206	0.0550821	0.0279311	0.00846257	0.102057	0.00846257	0.0969551	0.078869	0.022408	0.0168535	0.00846257	0.0140645	0.0630785	0.0056497	0.00846257	0.0112675	0.022408	0.0251735	0.0470174	0.0251735	0.030681	0.0140645	0.0140645	0.00846257	0.022408	0.0140645	0.0140645	0.022408	0.0056497	0.0630785	0.0279311	0.0388839
INFLUENZA VIRAL RNA TRANSCRIPTION AND REPLICATION	169	403301	2.78547	1	-0.444898	0.941819	100	100	RPSA (0.61 %)	0.00282885	0.0056497	0.00846257	0.0112675	0.00282885	0.0762558	0.0814747	0.127138	0.0604206	0.0550821	0.0279311	0.00846257	0.102057	0.00846257	0.0969551	0.078869	0.022408	0.0168535	0.00846257	0.0140645	0.0630785	0.0056497	0.00846257	0.0112675	0.022408	0.0251735	0.0470174	0.0251735	0.030681	0.0140645	0.0140645	0.00846257	0.022408	0.0140645	0.0140645	0.022408	0.0056497	0.0630785	0.0279311	0.0388839
REGULATION OF GLUCOKINASE BY GLUCOKINASE REGULATORY PROTEIN	27	185142	2.78547	1	-0.444898	0.941819	100	100	GCK (0.61 %)	0.00282885	0.0056497	0.00846257	0.0112675	0.00282885	0.0762558	0.0814747	0.127138	0.0604206	0.0550821	0.0279311	0.00846257	0.102057	0.00846257	0.0969551	0.078869	0.022408	0.0168535	0.00846257	0.0140645	0.0630785	0.0056497	0.00846257	0.0112675	0.022408	0.0251735	0.0470174	0.0251735	0.030681	0.0140645	0.0140645	0.00846257	0.022408	0.0140645	0.0140645	0.022408	0.0056497	0.0630785	0.0279311	0.0388839
AMYLOIDS	83	169234	2.78547	1	-0.444898	0.941819	100	100	LTF (0.61 %)	0.00282885	0.0056497	0.00846257	0.0112675	0.00282885	0.0762558	0.0814747	0.127138	0.0604206	0.0550821	0.0279311	0.00846257	0.102057	0.00846257	0.0969551	0.078869	0.022408	0.0168535	0.00846257	0.0140645	0.0630785	0.0056497	0.00846257	0.0112675	0.022408	0.0251735	0.0470174	0.0251735	0.030681	0.0140645	0.0140645	0.00846257	0.022408	0.0140645	0.0140645	0.022408	0.0056497	0.0630785	0.0279311	0.0388839
SCFSKP2 MEDIATED DEGRADATION OF P27 P21	56	256525	2.78547	1	-0.444898	0.941819	100	100	CCNE1 (0.61 %)	0.00282885	0.0056497	0.00846257	0.0112675	0.00282885	0.0762558	0.0814747	0.127138	0.0604206	0.0550821	0.0279311	0.00846257	0.102057	0.00846257	0.0969551	0.078869	0.022408	0.0168535	0.00846257	0.0140645	0.0630785	0.0056497	0.00846257	0.0112675	0.022408	0.0251735	0.0470174	0.0251735	0.030681	0.0140645	0.0140645	0.00846257	0.022408	0.0140645	0.0140645	0.022408	0.0056497	0.0630785	0.0279311	0.0388839
RESOLUTION OF AP SITES VIA THE SINGLE NUCLEOTIDE REPLACEMENT PATHWAY	12	55198	2.78547	1	-0.444898	0.941819	100	100	XRCC1 (0.61 %)	0.00282885	0.0056497	0.00846257	0.0112675	0.00282885	0.0762558	0.0814747	0.127138	0.0604206	0.0550821	0.0279311	0.00846257	0.102057	0.00846257	0.0969551	0.078869	0.022408	0.0168535	0.00846257	0.0140645	0.0630785	0.0056497	0.00846257	0.0112675	0.022408	0.0251735	0.0470174	0.0251735	0.030681	0.0140645	0.0140645	0.00846257	0.022408	0.0140645	0.0140645	0.022408	0.0056497	0.0630785	0.0279311	0.0388839
ECM REGULATORS	238	1117598	2.78547	1	-0.444898	0.941819	100	100	HYAL1 (0.61 %)	0.00282885	0.0056497	0.00846257	0.0112675	0.00282885	0.0762558	0.0814747	0.127138	0.0604206	0.0550821	0.0279311	0.00846257	0.102057	0.00846257	0.0969551	0.078869	0.022408	0.0168535	0.00846257	0.0140645	0.0630785	0.0056497	0.00846257	0.0112675	0.022408	0.0251735	0.0470174	0.0251735	0.030681	0.0140645	0.0140645	0.00846257	0.022408	0.0140645	0.0140645	0.022408	0.0056497	0.0630785	0.0279311	0.0388839
NOTCH SIGNALING PATHWAY	47	355437	19.5303	14	-0.144582	0.946271	100	85.7143	NOTCH4 (1.84 %) MAML1 (1.84 %) JAG2 (1.84 %) NOTCH3 (1.23 %) NOTCH1 (1.23 %) NOTCH2 (0.61 %) MAML2 (0.61 %) JAG1 (0.61 %)	0.022408	0.0443139	0.0657289	0.0866641	0.022408	0.469832	0.493326	0.663049	0.39261	0.364446	0.202783	0.0657289	0.577341	0.0657289	0.557743	0.481712	0.165818	0.127138	0.0657289	0.10713	0.40622	0.0443139	0.0657289	0.0866641	0.165818	0.18451	0.319732	0.18451	0.220647	0.10713	0.10713	0.0657289	0.165818	0.10713	0.10713	0.165818	0.0443139	0.40622	0.202783	0.271873
IL3 PATHWAY	27	130688	19.5303	14	-0.144582	0.946271	100	78.5714	JAK2 (3.07 %) PTPN11 (1.84 %) PRKACB (1.84 %) STAT5B (1.23 %) SHC1 (0.61 %) STAT5A (0.61 %) PRKACA (0.61 %) PIK3CA (0.61 %)	0.022408	0.0443139	0.0657289	0.0866641	0.022408	0.469832	0.493326	0.663049	0.39261	0.364446	0.202783	0.0657289	0.577341	0.0657289	0.557743	0.481712	0.165818	0.127138	0.0657289	0.10713	0.40622	0.0443139	0.0657289	0.0866641	0.165818	0.18451	0.319732	0.18451	0.220647	0.10713	0.10713	0.0657289	0.165818	0.10713	0.10713	0.165818	0.0443139	0.40622	0.202783	0.271873
MTOR PATHWAY	23	185613	17.3904	12	-0.161127	0.950638	100	75	PTEN (2.45 %) TSC2 (1.84 %) AKT1 (1.23 %) MKNK1 (1.23 %) EIF4G1 (1.23 %) TSC1 (1.23 %) PIK3CA (0.61 %)	0.0196347	0.0388839	0.0577551	0.0762558	0.0196347	0.426066	0.448383	0.61397	0.353551	0.327397	0.179876	0.0577551	0.529303	0.0577551	0.51026	0.437335	0.146697	0.112175	0.0577551	0.0943933	0.366244	0.0388839	0.0577551	0.0762558	0.146697	0.163451	0.28617	0.163451	0.195979	0.0943933	0.0943933	0.0577551	0.146697	0.0943933	0.0943933	0.146697	0.0388839	0.366244	0.179876	0.242416
EIF4 PATHWAY	24	204751	17.3904	12	-0.161127	0.950638	100	75	PTEN (2.45 %) IRS1 (1.84 %) PRKCB (1.23 %) AKT1 (1.23 %) MKNK1 (1.23 %) EIF4G1 (1.23 %) PIK3CA (0.61 %)	0.0196347	0.0388839	0.0577551	0.0762558	0.0196347	0.426066	0.448383	0.61397	0.353551	0.327397	0.179876	0.0577551	0.529303	0.0577551	0.51026	0.437335	0.146697	0.112175	0.0577551	0.0943933	0.366244	0.0388839	0.0577551	0.0762558	0.146697	0.163451	0.28617	0.163451	0.195979	0.0943933	0.0943933	0.0577551	0.146697	0.0943933	0.0943933	0.146697	0.0388839	0.366244	0.179876	0.242416
AKT PATHWAY	22	129998	15.1752	10	-0.181135	0.954283	100	80	PIK3CG (3.07 %) FOXO3 (1.23 %) AKT1 (1.23 %) RELA (0.61 %) IKBKB (0.61 %) PIK3CA (0.61 %)	0.0168535	0.033423	0.0497133	0.0657289	0.0168535	0.378687	0.399453	0.557743	0.31198	0.288189	0.156311	0.0497133	0.475805	0.0497133	0.457679	0.389159	0.127138	0.0969551	0.0497133	0.0814747	0.323576	0.033423	0.0497133	0.0657289	0.127138	0.141848	0.250952	0.141848	0.17053	0.0814747	0.0814747	0.0497133	0.127138	0.0814747	0.0814747	0.127138	0.033423	0.323576	0.156311	0.211766
HIF1 TFPATHWAY	66	396392	15.1752	10	-0.181135	0.954283	100	70	TERT (3.07 %) FOS (1.23 %) SMAD4 (1.23 %) AKT1 (1.23 %) ETS1 (0.61 %) GCK (0.61 %)	0.0168535	0.033423	0.0497133	0.0657289	0.0168535	0.378687	0.399453	0.557743	0.31198	0.288189	0.156311	0.0497133	0.475805	0.0497133	0.457679	0.389159	0.127138	0.0969551	0.0497133	0.0814747	0.323576	0.033423	0.0497133	0.0657289	0.127138	0.141848	0.250952	0.141848	0.17053	0.0814747	0.0814747	0.0497133	0.127138	0.0814747	0.0814747	0.127138	0.033423	0.323576	0.156311	0.211766
OPIOID SIGNALLING	78	504542	15.1752	10	-0.181135	0.954283	100	90	PRKCG (2.45 %) PRKACB (1.84 %) CDK5 (0.61 %) PRKACA (0.61 %) PRKAR1A (0.61 %) PRKCD (0.61 %)	0.0168535	0.033423	0.0497133	0.0657289	0.0168535	0.378687	0.399453	0.557743	0.31198	0.288189	0.156311	0.0497133	0.475805	0.0497133	0.457679	0.389159	0.127138	0.0969551	0.0497133	0.0814747	0.323576	0.033423	0.0497133	0.0657289	0.127138	0.141848	0.250952	0.141848	0.17053	0.0814747	0.0814747	0.0497133	0.127138	0.0814747	0.0814747	0.127138	0.033423	0.323576	0.156311	0.211766
CTLA4 INHIBITORY SIGNALING	21	142234	15.1752	10	-0.181135	0.954283	100	100	FYN (1.84 %) AKT1 (1.23 %) YES1 (1.23 %) AKT3 (0.61 %) LCK (0.61 %) SRC (0.61 %)	0.0168535	0.033423	0.0497133	0.0657289	0.0168535	0.378687	0.399453	0.557743	0.31198	0.288189	0.156311	0.0497133	0.475805	0.0497133	0.457679	0.389159	0.127138	0.0969551	0.0497133	0.0814747	0.323576	0.033423	0.0497133	0.0657289	0.127138	0.141848	0.250952	0.141848	0.17053	0.0814747	0.0814747	0.0497133	0.127138	0.0814747	0.0814747	0.127138	0.033423	0.323576	0.156311	0.211766
MET PATHWAY	37	271247	31.0188	24	-0.111414	0.955305	100	83.3333	PIK3CG (3.07 %) PTEN (2.45 %) PTPN11 (1.84 %) MET (1.84 %) MAP4K1 (1.84 %) PTK2 (1.23 %) FOS (1.23 %) HRAS (0.61 %) MAPK8 (0.61 %) STAT3 (0.61 %) RAF1 (0.61 %) SRC (0.61 %) PIK3CA (0.61 %) RAPGEF1 (0.61 %)	0.0388839	0.0762558	0.112175	0.146697	0.0388839	0.6706	0.695718	0.850981	0.582103	0.547606	0.327397	0.112175	0.778444	0.112175	0.760155	0.683408	0.271873	0.211766	0.112175	0.179876	0.598353	0.0762558	0.112175	0.146697	0.271873	0.300186	0.490447	0.300186	0.353551	0.179876	0.179876	0.112175	0.271873	0.179876	0.179876	0.271873	0.0762558	0.598353	0.327397	0.426066
NOTCH PATHWAY	59	472433	25.5423	19	-0.128506	0.955675	100	84.2105	MAML1 (1.84 %) JAG2 (1.84 %) NOTCH4 (1.84 %) NOTCH1 (1.23 %) FBXW7 (1.23 %) MYC (1.23 %) CNTN6 (1.23 %) NOTCH3 (1.23 %) NOTCH2 (0.61 %) MAML2 (0.61 %) JAG1 (0.61 %)	0.030681	0.0604206	0.0892478	0.117191	0.030681	0.582103	0.607353	0.77592	0.496188	0.46379	0.267736	0.0892478	0.69399	0.0892478	0.674311	0.594925	0.220647	0.17053	0.0892478	0.144276	0.511646	0.0604206	0.0892478	0.117191	0.220647	0.244559	0.411245	0.244559	0.290203	0.144276	0.144276	0.0892478	0.220647	0.144276	0.144276	0.220647	0.0604206	0.511646	0.267736	0.353551
UBIQUITIN MEDIATED PROTEOLYSIS	138	881964	12.8801	8	-0.206828	0.957566	100	100	MDM2 (1.23 %) FBXW7 (1.23 %) CBLB (1.23 %) BRCA1 (0.61 %) VHL (0.61 %)	0.0140645	0.0279311	0.0416027	0.0550821	0.0140645	0.327397	0.346184	0.493326	0.267736	0.246696	0.132069	0.0416027	0.416227	0.0416027	0.399453	0.336857	0.10713	0.0814747	0.0416027	0.0683719	0.278035	0.0279311	0.0416027	0.0550821	0.10713	0.119688	0.213996	0.119688	0.144276	0.0683719	0.0683719	0.0416027	0.10713	0.0683719	0.0683719	0.10713	0.0279311	0.278035	0.132069	0.179876
VIP PATHWAY	29	142681	12.8801	8	-0.206828	0.957566	100	100	PRKACB (1.84 %) MYC (1.23 %) RELA (0.61 %) PLCG1 (0.61 %) PRKAR1A (0.61 %)	0.0140645	0.0279311	0.0416027	0.0550821	0.0140645	0.327397	0.346184	0.493326	0.267736	0.246696	0.132069	0.0416027	0.416227	0.0416027	0.399453	0.336857	0.10713	0.0814747	0.0416027	0.0683719	0.278035	0.0279311	0.0416027	0.0550821	0.10713	0.119688	0.213996	0.119688	0.144276	0.0683719	0.0683719	0.0416027	0.10713	0.0683719	0.0683719	0.10713	0.0279311	0.278035	0.132069	0.179876
ATR PATHWAY	39	245350	12.8801	8	-0.206828	0.957566	100	100	MDM2 (1.23 %) CDC25A (1.23 %) BRCA2 (1.23 %) ATR (0.61 %) CHEK1 (0.61 %)	0.0140645	0.0279311	0.0416027	0.0550821	0.0140645	0.327397	0.346184	0.493326	0.267736	0.246696	0.132069	0.0416027	0.416227	0.0416027	0.399453	0.336857	0.10713	0.0814747	0.0416027	0.0683719	0.278035	0.0279311	0.0416027	0.0550821	0.10713	0.119688	0.213996	0.119688	0.144276	0.0683719	0.0683719	0.0416027	0.10713	0.0683719	0.0683719	0.10713	0.0279311	0.278035	0.132069	0.179876
RETINOIC ACID PATHWAY	30	229302	12.8801	8	-0.206828	0.957566	100	87.5	PRKCG (2.45 %) AKT1 (1.23 %) PRKACA (0.61 %) MAPK8 (0.61 %) CDK7 (0.61 %)	0.0140645	0.0279311	0.0416027	0.0550821	0.0140645	0.327397	0.346184	0.493326	0.267736	0.246696	0.132069	0.0416027	0.416227	0.0416027	0.399453	0.336857	0.10713	0.0814747	0.0416027	0.0683719	0.278035	0.0279311	0.0416027	0.0550821	0.10713	0.119688	0.213996	0.119688	0.144276	0.0683719	0.0683719	0.0416027	0.10713	0.0683719	0.0683719	0.10713	0.0279311	0.278035	0.132069	0.179876
INTEGRIN A4B1 PATHWAY	33	220761	12.8801	8	-0.206828	0.957566	100	100	PRKACB (1.84 %) PTK2 (1.23 %) SRC (0.61 %) PRKACA (0.61 %) PRKAR1A (0.61 %)	0.0140645	0.0279311	0.0416027	0.0550821	0.0140645	0.327397	0.346184	0.493326	0.267736	0.246696	0.132069	0.0416027	0.416227	0.0416027	0.399453	0.336857	0.10713	0.0814747	0.0416027	0.0683719	0.278035	0.0279311	0.0416027	0.0550821	0.10713	0.119688	0.213996	0.119688	0.144276	0.0683719	0.0683719	0.0416027	0.10713	0.0683719	0.0683719	0.10713	0.0279311	0.278035	0.132069	0.179876
REGULATION OF KIT SIGNALING	17	96752	12.8801	8	-0.206828	0.957566	100	100	FYN (1.84 %) YES1 (1.23 %) KIT (0.61 %) LCK (0.61 %) SRC (0.61 %)	0.0140645	0.0279311	0.0416027	0.0550821	0.0140645	0.327397	0.346184	0.493326	0.267736	0.246696	0.132069	0.0416027	0.416227	0.0416027	0.399453	0.336857	0.10713	0.0814747	0.0416027	0.0683719	0.278035	0.0279311	0.0416027	0.0550821	0.10713	0.119688	0.213996	0.119688	0.144276	0.0683719	0.0683719	0.0416027	0.10713	0.0683719	0.0683719	0.10713	0.0279311	0.278035	0.132069	0.179876
PECAM1 INTERACTIONS	10	63524	12.8801	8	-0.206828	0.957566	100	100	FYN (1.84 %) YES1 (1.23 %) LCK (0.61 %) PLCG1 (0.61 %) SRC (0.61 %)	0.0140645	0.0279311	0.0416027	0.0550821	0.0140645	0.327397	0.346184	0.493326	0.267736	0.246696	0.132069	0.0416027	0.416227	0.0416027	0.399453	0.336857	0.10713	0.0814747	0.0416027	0.0683719	0.278035	0.0279311	0.0416027	0.0550821	0.10713	0.119688	0.213996	0.119688	0.144276	0.0683719	0.0683719	0.0416027	0.10713	0.0683719	0.0683719	0.10713	0.0279311	0.278035	0.132069	0.179876
AKT PHOSPHORYLATES TARGETS IN THE CYTOSOL	12	89748	12.8801	8	-0.206828	0.957566	100	75	TSC2 (1.84 %) AKT1 (1.23 %) MDM2 (1.23 %) AKT3 (0.61 %) GSK3A (0.61 %)	0.0140645	0.0279311	0.0416027	0.0550821	0.0140645	0.327397	0.346184	0.493326	0.267736	0.246696	0.132069	0.0416027	0.416227	0.0416027	0.399453	0.336857	0.10713	0.0814747	0.0416027	0.0683719	0.278035	0.0279311	0.0416027	0.0550821	0.10713	0.119688	0.213996	0.119688	0.144276	0.0683719	0.0683719	0.0416027	0.10713	0.0683719	0.0683719	0.10713	0.0279311	0.278035	0.132069	0.179876
NOTCH HLH TRANSCRIPTION PATHWAY	13	153879	12.8801	8	-0.206828	0.957566	100	75	NOTCH4 (1.84 %) MAML1 (1.84 %) NOTCH3 (1.23 %) NOTCH2 (0.61 %) MAML2 (0.61 %)	0.0140645	0.0279311	0.0416027	0.0550821	0.0140645	0.327397	0.346184	0.493326	0.267736	0.246696	0.132069	0.0416027	0.416227	0.0416027	0.399453	0.336857	0.10713	0.0814747	0.0416027	0.0683719	0.278035	0.0279311	0.0416027	0.0550821	0.10713	0.119688	0.213996	0.119688	0.144276	0.0683719	0.0683719	0.0416027	0.10713	0.0683719	0.0683719	0.10713	0.0279311	0.278035	0.132069	0.179876
CREB PHOSPHORYLATION THROUGH THE ACTIVATION OF RAS	27	240122	12.8801	8	-0.206828	0.957566	100	100	BRAF (1.84 %) RPS6KA6 (1.23 %) HRAS (0.61 %) RAF1 (0.61 %) RPS6KA1 (0.61 %)	0.0140645	0.0279311	0.0416027	0.0550821	0.0140645	0.327397	0.346184	0.493326	0.267736	0.246696	0.132069	0.0416027	0.416227	0.0416027	0.399453	0.336857	0.10713	0.0814747	0.0416027	0.0683719	0.278035	0.0279311	0.0416027	0.0550821	0.10713	0.119688	0.213996	0.119688	0.144276	0.0683719	0.0683719	0.0416027	0.10713	0.0683719	0.0683719	0.10713	0.0279311	0.278035	0.132069	0.179876
JAK STAT SIGNALING PATHWAY	155	707530	37.6251	30	-0.0983562	0.958058	100	80	JAK2 (3.07 %) PIK3CG (3.07 %) JAK3 (1.84 %) PTPN11 (1.84 %) TYK2 (1.23 %) JAK1 (1.23 %) AKT1 (1.23 %) STAT5B (1.23 %) MYC (1.23 %) CBLB (1.23 %) PIK3CD (1.23 %) PIK3R2 (1.23 %) STAT3 (0.61 %) STAT2 (0.61 %) AKT3 (0.61 %) STAT5A (0.61 %) STAT6 (0.61 %) PIK3CA (0.61 %)	0.0497133	0.0969551	0.141848	0.18451	0.0497133	0.760155	0.783409	0.913498	0.674311	0.639344	0.399453	0.141848	0.855962	0.141848	0.840497	0.772078	0.334976	0.263576	0.141848	0.225051	0.690502	0.0969551	0.141848	0.18451	0.334976	0.368036	0.579729	0.368036	0.429309	0.225051	0.225051	0.141848	0.334976	0.225051	0.225051	0.334976	0.0969551	0.690502	0.399453	0.51026
VEGFR1 2 PATHWAY	69	492492	37.6251	30	-0.0983562	0.958058	100	73.3333	KDR (4.91 %) FLT1 (2.45 %) FYN (1.84 %) PTPN11 (1.84 %) BRAF (1.84 %) PTK2 (1.23 %) PRKCB (1.23 %) CTNNB1 (1.23 %) AKT1 (1.23 %) FES (1.23 %) ROCK1 (0.61 %) MAP2K6 (0.61 %) PRKACA (0.61 %) RAF1 (0.61 %) PIK3CA (0.61 %) PLCG1 (0.61 %) SRC (0.61 %) PRKCD (0.61 %)	0.0497133	0.0969551	0.141848	0.18451	0.0497133	0.760155	0.783409	0.913498	0.674311	0.639344	0.399453	0.141848	0.855962	0.141848	0.840497	0.772078	0.334976	0.263576	0.141848	0.225051	0.690502	0.0969551	0.141848	0.18451	0.334976	0.368036	0.579729	0.368036	0.429309	0.225051	0.225051	0.141848	0.334976	0.225051	0.225051	0.334976	0.0969551	0.690502	0.399453	0.51026
CHREBP2 PATHWAY	42	291123	10.4996	6	-0.243021	0.961118	100	100	PRKACB (1.84 %) GCK (0.61 %) PRKACA (0.61 %) PRKAR1A (0.61 %)	0.0112675	0.022408	0.033423	0.0443139	0.0112675	0.271873	0.288189	0.419525	0.220647	0.202783	0.10713	0.033423	0.349878	0.033423	0.334976	0.280078	0.0866641	0.0657289	0.033423	0.0550821	0.229429	0.022408	0.033423	0.0443139	0.0866641	0.0969551	0.175217	0.0969551	0.117191	0.0550821	0.0550821	0.033423	0.0866641	0.0550821	0.0550821	0.0866641	0.022408	0.229429	0.10713	0.146697
NFAT TFPATHWAY	47	222907	10.4996	6	-0.243021	0.961118	100	100	FOS (1.23 %) CBLB (1.23 %) PRKCQ (0.61 %) JUNB (0.61 %)	0.0112675	0.022408	0.033423	0.0443139	0.0112675	0.271873	0.288189	0.419525	0.220647	0.202783	0.10713	0.033423	0.349878	0.033423	0.334976	0.280078	0.0866641	0.0657289	0.033423	0.0550821	0.229429	0.022408	0.033423	0.0443139	0.0866641	0.0969551	0.175217	0.0969551	0.117191	0.0550821	0.0550821	0.033423	0.0866641	0.0550821	0.0550821	0.0866641	0.022408	0.229429	0.10713	0.146697
ILK PATHWAY	45	307633	10.4996	6	-0.243021	0.961118	100	83.3333	GSK3B (1.23 %) CTNNB1 (1.23 %) AKT1 (1.23 %) AURKA (0.61 %)	0.0112675	0.022408	0.033423	0.0443139	0.0112675	0.271873	0.288189	0.419525	0.220647	0.202783	0.10713	0.033423	0.349878	0.033423	0.334976	0.280078	0.0866641	0.0657289	0.033423	0.0550821	0.229429	0.022408	0.033423	0.0443139	0.0866641	0.0969551	0.175217	0.0969551	0.117191	0.0550821	0.0550821	0.033423	0.0866641	0.0550821	0.0550821	0.0866641	0.022408	0.229429	0.10713	0.146697
ERA GENOMIC PATHWAY	65	408306	10.4996	6	-0.243021	0.961118	100	83.3333	MYC (1.23 %) SMAD4 (1.23 %) STAT5A (0.61 %) BRCA1 (0.61 %)	0.0112675	0.022408	0.033423	0.0443139	0.0112675	0.271873	0.288189	0.419525	0.220647	0.202783	0.10713	0.033423	0.349878	0.033423	0.334976	0.280078	0.0866641	0.0657289	0.033423	0.0550821	0.229429	0.022408	0.033423	0.0443139	0.0866641	0.0969551	0.175217	0.0969551	0.117191	0.0550821	0.0550821	0.033423	0.0866641	0.0550821	0.0550821	0.0866641	0.022408	0.229429	0.10713	0.146697
SIGNALING BY RHO GTPASES	113	901913	10.4996	6	-0.243021	0.961118	100	83.3333	VAV3 (1.23 %) PIK3R2 (1.23 %) VAV1 (1.23 %) RHOB (0.61 %)	0.0112675	0.022408	0.033423	0.0443139	0.0112675	0.271873	0.288189	0.419525	0.220647	0.202783	0.10713	0.033423	0.349878	0.033423	0.334976	0.280078	0.0866641	0.0657289	0.033423	0.0550821	0.229429	0.022408	0.033423	0.0443139	0.0866641	0.0969551	0.175217	0.0969551	0.117191	0.0550821	0.0550821	0.033423	0.0866641	0.0550821	0.0550821	0.0866641	0.022408	0.229429	0.10713	0.146697
DOWNREGULATION OF ERBB2 ERBB3 SIGNALING	12	105164	10.4996	6	-0.243021	0.961118	100	66.6667	ERBB2 (1.84 %) ERBB3 (1.84 %) AKT1 (1.23 %) AKT3 (0.61 %)	0.0112675	0.022408	0.033423	0.0443139	0.0112675	0.271873	0.288189	0.419525	0.220647	0.202783	0.10713	0.033423	0.349878	0.033423	0.334976	0.280078	0.0866641	0.0657289	0.033423	0.0550821	0.229429	0.022408	0.033423	0.0443139	0.0866641	0.0969551	0.175217	0.0969551	0.117191	0.0550821	0.0550821	0.033423	0.0866641	0.0550821	0.0550821	0.0866641	0.022408	0.229429	0.10713	0.146697
GENERATION OF SECOND MESSENGER MOLECULES	27	254332	10.4996	6	-0.243021	0.961118	100	83.3333	ITK (1.84 %) LCK (0.61 %) PLCG1 (0.61 %) ZAP70 (0.61 %)	0.0112675	0.022408	0.033423	0.0443139	0.0112675	0.271873	0.288189	0.419525	0.220647	0.202783	0.10713	0.033423	0.349878	0.033423	0.334976	0.280078	0.0866641	0.0657289	0.033423	0.0550821	0.229429	0.022408	0.033423	0.0443139	0.0866641	0.0969551	0.175217	0.0969551	0.117191	0.0550821	0.0550821	0.033423	0.0866641	0.0550821	0.0550821	0.0866641	0.022408	0.229429	0.10713	0.146697
DARPP 32 EVENTS	25	139271	10.4996	6	-0.243021	0.961118	100	100	PRKACB (1.84 %) CDK5 (0.61 %) PRKACA (0.61 %) PRKAR1A (0.61 %)	0.0112675	0.022408	0.033423	0.0443139	0.0112675	0.271873	0.288189	0.419525	0.220647	0.202783	0.10713	0.033423	0.349878	0.033423	0.334976	0.280078	0.0866641	0.0657289	0.033423	0.0550821	0.229429	0.022408	0.033423	0.0443139	0.0866641	0.0969551	0.175217	0.0969551	0.117191	0.0550821	0.0550821	0.033423	0.0866641	0.0550821	0.0550821	0.0866641	0.022408	0.229429	0.10713	0.146697
EFFECTS OF PIP2 HYDROLYSIS	25	193855	10.4996	6	-0.243021	0.961118	100	100	PRKCE (1.84 %) PRKCD (0.61 %) PRKCH (0.61 %) PRKCQ (0.61 %)	0.0112675	0.022408	0.033423	0.0443139	0.0112675	0.271873	0.288189	0.419525	0.220647	0.202783	0.10713	0.033423	0.349878	0.033423	0.334976	0.280078	0.0866641	0.0657289	0.033423	0.0550821	0.229429	0.022408	0.033423	0.0443139	0.0866641	0.0969551	0.175217	0.0969551	0.117191	0.0550821	0.0550821	0.033423	0.0866641	0.0550821	0.0550821	0.0866641	0.022408	0.229429	0.10713	0.146697
RAP1 SIGNALLING	17	117984	10.4996	6	-0.243021	0.961118	100	100	PRKACB (1.84 %) PRKACA (0.61 %) PRKG1 (0.61 %) RAF1 (0.61 %)	0.0112675	0.022408	0.033423	0.0443139	0.0112675	0.271873	0.288189	0.419525	0.220647	0.202783	0.10713	0.033423	0.349878	0.033423	0.334976	0.280078	0.0866641	0.0657289	0.033423	0.0550821	0.229429	0.022408	0.033423	0.0443139	0.0866641	0.0969551	0.175217	0.0969551	0.117191	0.0550821	0.0550821	0.033423	0.0866641	0.0550821	0.0550821	0.0866641	0.022408	0.229429	0.10713	0.146697
INSULIN PATHWAY	22	129087	23.6024	17	-0.142507	0.961807	100	82.3529	PIK3CG (3.07 %) PTPN11 (1.84 %) IRS1 (1.84 %) INSR (1.84 %) FOS (1.23 %) HRAS (0.61 %) MAPK8 (0.61 %) RAF1 (0.61 %) SHC1 (0.61 %) PIK3CA (0.61 %)	0.0279311	0.0550821	0.0814747	0.10713	0.0279311	0.547606	0.572525	0.743281	0.46379	0.432533	0.246696	0.0814747	0.659209	0.0814747	0.639344	0.560242	0.202783	0.156311	0.0814747	0.132069	0.478767	0.0550821	0.0814747	0.10713	0.202783	0.225051	0.382197	0.225051	0.267736	0.132069	0.132069	0.0814747	0.202783	0.132069	0.132069	0.202783	0.0550821	0.478767	0.246696	0.327397
SMAD2 3NUCLEAR PATHWAY	82	546880	23.6024	17	-0.142507	0.961807	100	76.4706	RBL1 (2.45 %) TFDP1 (2.45 %) SMAD4 (1.23 %) FOXO3 (1.23 %) MYC (1.23 %) FOS (1.23 %) AKT1 (1.23 %) SKI (0.61 %) CDKN2B (0.61 %) SMAD2 (0.61 %)	0.0279311	0.0550821	0.0814747	0.10713	0.0279311	0.547606	0.572525	0.743281	0.46379	0.432533	0.246696	0.0814747	0.659209	0.0814747	0.639344	0.560242	0.202783	0.156311	0.0814747	0.132069	0.478767	0.0550821	0.0814747	0.10713	0.202783	0.225051	0.382197	0.225051	0.267736	0.132069	0.132069	0.0814747	0.202783	0.132069	0.132069	0.202783	0.0550821	0.478767	0.246696	0.327397
MET PATHWAY	80	551119	39.1683	31	-0.101573	0.966086	100	77.4194	APC (6.75 %) PAK4 (1.84 %) PTPN11 (1.84 %) MET (1.84 %) AKT1 (1.23 %) PTK2 (1.23 %) CTNNB1 (1.23 %) RPTOR (1.23 %) HRAS (0.61 %) RANBP9 (0.61 %) PLCG1 (0.61 %) PRKCI (0.61 %) SHC1 (0.61 %) SRC (0.61 %) RAPGEF1 (0.61 %) MAPK8 (0.61 %) PIK3CA (0.61 %) RAF1 (0.61 %) ETS1 (0.61 %)	0.0524015	0.102057	0.149111	0.193698	0.0524015	0.778444	0.801056	0.924496	0.69399	0.659209	0.416227	0.149111	0.870662	0.149111	0.855962	0.790054	0.349878	0.275987	0.149111	0.23595	0.710025	0.102057	0.149111	0.193698	0.349878	0.383945	0.599489	0.383945	0.446818	0.23595	0.23595	0.149111	0.349878	0.23595	0.23595	0.349878	0.102057	0.710025	0.416227	0.529303
ARENRF2 PATHWAY	13	90016	8.02798	4	-0.302546	0.96629	100	75	PRKCB (1.23 %) FOS (1.23 %) MAPK8 (0.61 %)	0.00846257	0.0168535	0.0251735	0.033423	0.00846257	0.211766	0.225051	0.334976	0.17053	0.156311	0.0814747	0.0251735	0.275987	0.0251735	0.263576	0.218437	0.0657289	0.0497133	0.0251735	0.0416027	0.17755	0.0168535	0.0251735	0.033423	0.0657289	0.0736353	0.134524	0.0736353	0.0892478	0.0416027	0.0416027	0.0251735	0.0657289	0.0416027	0.0416027	0.0657289	0.0168535	0.17755	0.0814747	0.112175
NKCELLS PATHWAY	20	118732	8.02798	4	-0.302546	0.96629	100	100	VAV1 (1.23 %) PIK3CA (0.61 %) SYK (0.61 %)	0.00846257	0.0168535	0.0251735	0.033423	0.00846257	0.211766	0.225051	0.334976	0.17053	0.156311	0.0814747	0.0251735	0.275987	0.0251735	0.263576	0.218437	0.0657289	0.0497133	0.0251735	0.0416027	0.17755	0.0168535	0.0251735	0.033423	0.0657289	0.0736353	0.134524	0.0736353	0.0892478	0.0416027	0.0416027	0.0251735	0.0657289	0.0416027	0.0416027	0.0657289	0.0168535	0.17755	0.0814747	0.112175
TOB1 PATHWAY	21	85737	8.02798	4	-0.302546	0.96629	100	75	SMAD4 (1.23 %) TGFBR2 (0.61 %) TGFBR1 (0.61 %)	0.00846257	0.0168535	0.0251735	0.033423	0.00846257	0.211766	0.225051	0.334976	0.17053	0.156311	0.0814747	0.0251735	0.275987	0.0251735	0.263576	0.218437	0.0657289	0.0497133	0.0251735	0.0416027	0.17755	0.0168535	0.0251735	0.033423	0.0657289	0.0736353	0.134524	0.0736353	0.0892478	0.0416027	0.0416027	0.0251735	0.0657289	0.0416027	0.0416027	0.0657289	0.0168535	0.17755	0.0814747	0.112175
CD40PATHWAYMAP	34	223858	8.02798	4	-0.302546	0.96629	100	100	PIK3CD (1.23 %) PIK3CA (0.61 %) MAPK8 (0.61 %)	0.00846257	0.0168535	0.0251735	0.033423	0.00846257	0.211766	0.225051	0.334976	0.17053	0.156311	0.0814747	0.0251735	0.275987	0.0251735	0.263576	0.218437	0.0657289	0.0497133	0.0251735	0.0416027	0.17755	0.0168535	0.0251735	0.033423	0.0657289	0.0736353	0.134524	0.0736353	0.0892478	0.0416027	0.0416027	0.0251735	0.0657289	0.0416027	0.0416027	0.0657289	0.0168535	0.17755	0.0814747	0.112175
G2 AND M PHASES	8	41449	8.02798	4	-0.302546	0.96629	100	100	CDC25A (1.23 %) CDK7 (0.61 %) CHEK1 (0.61 %)	0.00846257	0.0168535	0.0251735	0.033423	0.00846257	0.211766	0.225051	0.334976	0.17053	0.156311	0.0814747	0.0251735	0.275987	0.0251735	0.263576	0.218437	0.0657289	0.0497133	0.0251735	0.0416027	0.17755	0.0168535	0.0251735	0.033423	0.0657289	0.0736353	0.134524	0.0736353	0.0892478	0.0416027	0.0416027	0.0251735	0.0657289	0.0416027	0.0416027	0.0657289	0.0168535	0.17755	0.0814747	0.112175
CASPASE PATHWAY	52	322622	8.02798	4	-0.302546	0.96629	100	100	PTK2 (1.23 %) RIPK1 (0.61 %) BAX (0.61 %)	0.00846257	0.0168535	0.0251735	0.033423	0.00846257	0.211766	0.225051	0.334976	0.17053	0.156311	0.0814747	0.0251735	0.275987	0.0251735	0.263576	0.218437	0.0657289	0.0497133	0.0251735	0.0416027	0.17755	0.0168535	0.0251735	0.033423	0.0657289	0.0736353	0.134524	0.0736353	0.0892478	0.0416027	0.0416027	0.0251735	0.0657289	0.0416027	0.0416027	0.0657289	0.0168535	0.17755	0.0814747	0.112175
TCR CALCIUM PATHWAY	29	128434	8.02798	4	-0.302546	0.96629	100	100	FOS (1.23 %) PRKACA (0.61 %) JUNB (0.61 %)	0.00846257	0.0168535	0.0251735	0.033423	0.00846257	0.211766	0.225051	0.334976	0.17053	0.156311	0.0814747	0.0251735	0.275987	0.0251735	0.263576	0.218437	0.0657289	0.0497133	0.0251735	0.0416027	0.17755	0.0168535	0.0251735	0.033423	0.0657289	0.0736353	0.134524	0.0736353	0.0892478	0.0416027	0.0416027	0.0251735	0.0657289	0.0416027	0.0416027	0.0657289	0.0168535	0.17755	0.0814747	0.112175
ACTIVATION OF NF KAPPAB IN B CELLS	64	333108	8.02798	4	-0.302546	0.96629	100	100	PRKCB (1.23 %) IKBKB (0.61 %) RELA (0.61 %)	0.00846257	0.0168535	0.0251735	0.033423	0.00846257	0.211766	0.225051	0.334976	0.17053	0.156311	0.0814747	0.0251735	0.275987	0.0251735	0.263576	0.218437	0.0657289	0.0497133	0.0251735	0.0416027	0.17755	0.0168535	0.0251735	0.033423	0.0657289	0.0736353	0.134524	0.0736353	0.0892478	0.0416027	0.0416027	0.0251735	0.0657289	0.0416027	0.0416027	0.0657289	0.0168535	0.17755	0.0814747	0.112175
DOWNREGULATION OF SMAD2 3 SMAD4 TRANSCRIPTIONAL ACTIVITY	20	188329	8.02798	4	-0.302546	0.96629	100	75	SMAD4 (1.23 %) SMAD2 (0.61 %) SKI (0.61 %)	0.00846257	0.0168535	0.0251735	0.033423	0.00846257	0.211766	0.225051	0.334976	0.17053	0.156311	0.0814747	0.0251735	0.275987	0.0251735	0.263576	0.218437	0.0657289	0.0497133	0.0251735	0.0416027	0.17755	0.0168535	0.0251735	0.033423	0.0657289	0.0736353	0.134524	0.0736353	0.0892478	0.0416027	0.0416027	0.0251735	0.0657289	0.0416027	0.0416027	0.0657289	0.0168535	0.17755	0.0814747	0.112175
P75NTR RECRUITS SIGNALLING COMPLEXES	12	52345	8.02798	4	-0.302546	0.96629	100	100	IRAK1 (1.23 %) IKBKB (0.61 %) PRKCI (0.61 %)	0.00846257	0.0168535	0.0251735	0.033423	0.00846257	0.211766	0.225051	0.334976	0.17053	0.156311	0.0814747	0.0251735	0.275987	0.0251735	0.263576	0.218437	0.0657289	0.0497133	0.0251735	0.0416027	0.17755	0.0168535	0.0251735	0.033423	0.0657289	0.0736353	0.134524	0.0736353	0.0892478	0.0416027	0.0416027	0.0251735	0.0657289	0.0416027	0.0416027	0.0657289	0.0168535	0.17755	0.0814747	0.112175
NFKB IS ACTIVATED AND SIGNALS SURVIVAL	11	47235	8.02798	4	-0.302546	0.96629	100	100	IRAK1 (1.23 %) IKBKB (0.61 %) RELA (0.61 %)	0.00846257	0.0168535	0.0251735	0.033423	0.00846257	0.211766	0.225051	0.334976	0.17053	0.156311	0.0814747	0.0251735	0.275987	0.0251735	0.263576	0.218437	0.0657289	0.0497133	0.0251735	0.0416027	0.17755	0.0168535	0.0251735	0.033423	0.0657289	0.0736353	0.134524	0.0736353	0.0892478	0.0416027	0.0416027	0.0251735	0.0657289	0.0416027	0.0416027	0.0657289	0.0168535	0.17755	0.0814747	0.112175
REGULATION OF BETA CELL DEVELOPMENT	30	158926	8.02798	4	-0.302546	0.96629	100	100	AKT1 (1.23 %) AKT3 (0.61 %) GCK (0.61 %)	0.00846257	0.0168535	0.0251735	0.033423	0.00846257	0.211766	0.225051	0.334976	0.17053	0.156311	0.0814747	0.0251735	0.275987	0.0251735	0.263576	0.218437	0.0657289	0.0497133	0.0251735	0.0416027	0.17755	0.0168535	0.0251735	0.033423	0.0657289	0.0736353	0.134524	0.0736353	0.0892478	0.0416027	0.0416027	0.0251735	0.0657289	0.0416027	0.0416027	0.0657289	0.0168535	0.17755	0.0814747	0.112175
REGULATION OF GENE EXPRESSION IN BETA CELLS	20	107471	8.02798	4	-0.302546	0.96629	100	100	AKT1 (1.23 %) AKT3 (0.61 %) GCK (0.61 %)	0.00846257	0.0168535	0.0251735	0.033423	0.00846257	0.211766	0.225051	0.334976	0.17053	0.156311	0.0814747	0.0251735	0.275987	0.0251735	0.263576	0.218437	0.0657289	0.0497133	0.0251735	0.0416027	0.17755	0.0168535	0.0251735	0.033423	0.0657289	0.0736353	0.134524	0.0736353	0.0892478	0.0416027	0.0416027	0.0251735	0.0657289	0.0416027	0.0416027	0.0657289	0.0168535	0.17755	0.0814747	0.112175
MITOTIC G2 G2 M PHASES	81	532269	8.02798	4	-0.302546	0.96629	100	100	CDC25A (1.23 %) CDK7 (0.61 %) PRKACA (0.61 %)	0.00846257	0.0168535	0.0251735	0.033423	0.00846257	0.211766	0.225051	0.334976	0.17053	0.156311	0.0814747	0.0251735	0.275987	0.0251735	0.263576	0.218437	0.0657289	0.0497133	0.0251735	0.0416027	0.17755	0.0168535	0.0251735	0.033423	0.0657289	0.0736353	0.134524	0.0736353	0.0892478	0.0416027	0.0416027	0.0251735	0.0657289	0.0416027	0.0416027	0.0657289	0.0168535	0.17755	0.0814747	0.112175
ACTIVATION OF ATR IN RESPONSE TO REPLICATION STRESS	38	166633	8.02798	4	-0.302546	0.96629	100	100	CDC25A (1.23 %) CHEK1 (0.61 %) ATR (0.61 %)	0.00846257	0.0168535	0.0251735	0.033423	0.00846257	0.211766	0.225051	0.334976	0.17053	0.156311	0.0814747	0.0251735	0.275987	0.0251735	0.263576	0.218437	0.0657289	0.0497133	0.0251735	0.0416027	0.17755	0.0168535	0.0251735	0.033423	0.0657289	0.0736353	0.134524	0.0736353	0.0892478	0.0416027	0.0416027	0.0251735	0.0657289	0.0416027	0.0416027	0.0657289	0.0168535	0.17755	0.0814747	0.112175
ECM AFFILIATED	171	1008643	8.02798	4	-0.302546	0.96629	100	100	SEMA3B (1.23 %) GPC3 (0.61 %) SEMA3F (0.61 %)	0.00846257	0.0168535	0.0251735	0.033423	0.00846257	0.211766	0.225051	0.334976	0.17053	0.156311	0.0814747	0.0251735	0.275987	0.0251735	0.263576	0.218437	0.0657289	0.0497133	0.0251735	0.0416027	0.17755	0.0168535	0.0251735	0.033423	0.0657289	0.0736353	0.134524	0.0736353	0.0892478	0.0416027	0.0416027	0.0251735	0.0657289	0.0416027	0.0416027	0.0657289	0.0168535	0.17755	0.0814747	0.112175
ERK5 PATHWAY	18	121907	21.5996	15	-0.158355	0.966892	100	73.3333	NTRK1 (4.29 %) PIK3CG (3.07 %) AKT1 (1.23 %) HRAS (0.61 %) SHC1 (0.61 %) PIK3CA (0.61 %) PLCG1 (0.61 %) MAPK7 (0.61 %) RPS6KA1 (0.61 %)	0.0251735	0.0497133	0.0736353	0.0969551	0.0251735	0.51026	0.534607	0.705888	0.429309	0.399453	0.225051	0.0736353	0.620476	0.0736353	0.600622	0.522589	0.18451	0.141848	0.0736353	0.119688	0.443675	0.0497133	0.0736353	0.0969551	0.18451	0.205039	0.351717	0.205039	0.244559	0.119688	0.119688	0.0736353	0.18451	0.119688	0.119688	0.18451	0.0497133	0.443675	0.225051	0.300186
IL2 STAT5 PATHWAY	30	170352	21.5996	15	-0.158355	0.966892	100	93.3333	JAK3 (1.84 %) PTPN11 (1.84 %) JAK1 (1.23 %) STAT5B (1.23 %) MYC (1.23 %) LCK (0.61 %) SHC1 (0.61 %) PIK3CA (0.61 %) STAT5A (0.61 %)	0.0251735	0.0497133	0.0736353	0.0969551	0.0251735	0.51026	0.534607	0.705888	0.429309	0.399453	0.225051	0.0736353	0.620476	0.0736353	0.600622	0.522589	0.18451	0.141848	0.0736353	0.119688	0.443675	0.0497133	0.0736353	0.0969551	0.18451	0.205039	0.351717	0.205039	0.244559	0.119688	0.119688	0.0736353	0.18451	0.119688	0.119688	0.18451	0.0497133	0.443675	0.225051	0.300186
NCADHERIN PATHWAY	33	228773	21.5996	15	-0.158355	0.966892	100	100	FGFR1 (1.84 %) PTPN11 (1.84 %) JUP (1.23 %) CTNNB1 (1.23 %) PLCG1 (0.61 %) PIK3CA (0.61 %) MAPK8 (0.61 %) ROCK1 (0.61 %) FER (0.61 %)	0.0251735	0.0497133	0.0736353	0.0969551	0.0251735	0.51026	0.534607	0.705888	0.429309	0.399453	0.225051	0.0736353	0.620476	0.0736353	0.600622	0.522589	0.18451	0.141848	0.0736353	0.119688	0.443675	0.0497133	0.0736353	0.0969551	0.18451	0.205039	0.351717	0.205039	0.244559	0.119688	0.119688	0.0736353	0.18451	0.119688	0.119688	0.18451	0.0497133	0.443675	0.225051	0.300186
EPO PATHWAY	34	222767	27.4229	20	-0.137084	0.969717	100	85	JAK2 (3.07 %) PTPN11 (1.84 %) TEC (1.84 %) VAV2 (1.23 %) STAT5B (1.23 %) PLCG2 (1.23 %) RAPGEF1 (0.61 %) PLCG1 (0.61 %) SHC1 (0.61 %) STAT5A (0.61 %) HRAS (0.61 %) MAPK8 (0.61 %)	0.033423	0.0657289	0.0969551	0.127138	0.033423	0.61397	0.639344	0.804409	0.526629	0.493326	0.288189	0.0969551	0.72522	0.0969551	0.705888	0.626873	0.238111	0.18451	0.0969551	0.156311	0.54245	0.0657289	0.0969551	0.127138	0.238111	0.263576	0.438927	0.263576	0.31198	0.156311	0.156311	0.0969551	0.238111	0.156311	0.156311	0.238111	0.0657289	0.54245	0.288189	0.378687
ANTIGEN ACTIVATES B CELL RECEPTOR LEADING TO GENERATION OF SECOND MESSENGERS	29	189041	19.5303	13	-0.176766	0.97116	100	92.3077	FYN (1.84 %) PIK3CD (1.23 %) PLCG2 (1.23 %) VAV1 (1.23 %) CBLB (1.23 %) PLCG1 (0.61 %) SHC1 (0.61 %) SYK (0.61 %)	0.022408	0.0443139	0.0657289	0.0866641	0.022408	0.469832	0.493326	0.663049	0.39261	0.364446	0.202783	0.0657289	0.577341	0.0657289	0.557743	0.481712	0.165818	0.127138	0.0657289	0.10713	0.40622	0.0443139	0.0657289	0.0866641	0.165818	0.18451	0.319732	0.18451	0.220647	0.10713	0.10713	0.0657289	0.165818	0.10713	0.10713	0.165818	0.0443139	0.40622	0.202783	0.271873
IL3 PATHWAY	15	69452	17.3904	11	-0.198916	0.974835	100	90.9091	JAK2 (3.07 %) STAT5B (1.23 %) FOS (1.23 %) HRAS (0.61 %) RAF1 (0.61 %) SHC1 (0.61 %) STAT5A (0.61 %)	0.0196347	0.0388839	0.0577551	0.0762558	0.0196347	0.426066	0.448383	0.61397	0.353551	0.327397	0.179876	0.0577551	0.529303	0.0577551	0.51026	0.437335	0.146697	0.112175	0.0577551	0.0943933	0.366244	0.0388839	0.0577551	0.0762558	0.146697	0.163451	0.28617	0.163451	0.195979	0.0943933	0.0943933	0.0577551	0.146697	0.0943933	0.0943933	0.146697	0.0388839	0.366244	0.179876	0.242416
PTDINS PATHWAY	23	159796	17.3904	11	-0.198916	0.974835	100	81.8182	PRKCE (1.84 %) GSK3B (1.23 %) AKT1 (1.23 %) VAV2 (1.23 %) GSK3A (0.61 %) JAG1 (0.61 %) PLCG1 (0.61 %)	0.0196347	0.0388839	0.0577551	0.0762558	0.0196347	0.426066	0.448383	0.61397	0.353551	0.327397	0.179876	0.0577551	0.529303	0.0577551	0.51026	0.437335	0.146697	0.112175	0.0577551	0.0943933	0.366244	0.0388839	0.0577551	0.0762558	0.146697	0.163451	0.28617	0.163451	0.195979	0.0943933	0.0943933	0.0577551	0.146697	0.0943933	0.0943933	0.146697	0.0388839	0.366244	0.179876	0.242416
NECTIN PATHWAY	30	227690	17.3904	11	-0.198916	0.974835	100	90.9091	PDGFRB (1.84 %) VAV2 (1.23 %) PTK2 (1.23 %) CTNNB1 (1.23 %) RAPGEF1 (0.61 %) SRC (0.61 %) PIK3CA (0.61 %)	0.0196347	0.0388839	0.0577551	0.0762558	0.0196347	0.426066	0.448383	0.61397	0.353551	0.327397	0.179876	0.0577551	0.529303	0.0577551	0.51026	0.437335	0.146697	0.112175	0.0577551	0.0943933	0.366244	0.0388839	0.0577551	0.0762558	0.146697	0.163451	0.28617	0.163451	0.195979	0.0943933	0.0943933	0.0577551	0.146697	0.0943933	0.0943933	0.146697	0.0388839	0.366244	0.179876	0.242416
ECADHERIN NASCENT AJ PATHWAY	39	333964	17.3904	11	-0.198916	0.974835	100	100	JUP (1.23 %) AKT1 (1.23 %) CTNNB1 (1.23 %) VAV2 (1.23 %) PIK3CA (0.61 %) RAPGEF1 (0.61 %) SRC (0.61 %)	0.0196347	0.0388839	0.0577551	0.0762558	0.0196347	0.426066	0.448383	0.61397	0.353551	0.327397	0.179876	0.0577551	0.529303	0.0577551	0.51026	0.437335	0.146697	0.112175	0.0577551	0.0943933	0.366244	0.0388839	0.0577551	0.0762558	0.146697	0.163451	0.28617	0.163451	0.195979	0.0943933	0.0943933	0.0577551	0.146697	0.0943933	0.0943933	0.146697	0.0388839	0.366244	0.179876	0.242416
PDGFRA PATHWAY	22	124182	17.3904	11	-0.198916	0.974835	100	63.6364	PDGFRA (3.68 %) JAK1 (1.23 %) FOS (1.23 %) PIK3CA (0.61 %) RAPGEF1 (0.61 %) PLCG1 (0.61 %) SHC1 (0.61 %)	0.0196347	0.0388839	0.0577551	0.0762558	0.0196347	0.426066	0.448383	0.61397	0.353551	0.327397	0.179876	0.0577551	0.529303	0.0577551	0.51026	0.437335	0.146697	0.112175	0.0577551	0.0943933	0.366244	0.0388839	0.0577551	0.0762558	0.146697	0.163451	0.28617	0.163451	0.195979	0.0943933	0.0943933	0.0577551	0.146697	0.0943933	0.0943933	0.146697	0.0388839	0.366244	0.179876	0.242416
ALPHA SYNUCLEIN PATHWAY	33	162228	17.3904	11	-0.198916	0.974835	100	81.8182	HCK (1.84 %) FYN (1.84 %) YES1 (1.23 %) SRC (0.61 %) PRKCD (0.61 %) LCK (0.61 %) SYK (0.61 %)	0.0196347	0.0388839	0.0577551	0.0762558	0.0196347	0.426066	0.448383	0.61397	0.353551	0.327397	0.179876	0.0577551	0.529303	0.0577551	0.51026	0.437335	0.146697	0.112175	0.0577551	0.0943933	0.366244	0.0388839	0.0577551	0.0762558	0.146697	0.163451	0.28617	0.163451	0.195979	0.0943933	0.0943933	0.0577551	0.146697	0.0943933	0.0943933	0.146697	0.0388839	0.366244	0.179876	0.242416
MATRISOME ASSOCIATED	753	3308314	17.3904	11	-0.198916	0.974835	100	81.8182	INHBA (3.07 %) SEMA3B (1.23 %) VEGFC (1.23 %) GPC3 (0.61 %) SEMA3F (0.61 %) HYAL1 (0.61 %) MST1 (0.61 %)	0.0196347	0.0388839	0.0577551	0.0762558	0.0196347	0.426066	0.448383	0.61397	0.353551	0.327397	0.179876	0.0577551	0.529303	0.0577551	0.51026	0.437335	0.146697	0.112175	0.0577551	0.0943933	0.366244	0.0388839	0.0577551	0.0762558	0.146697	0.163451	0.28617	0.163451	0.195979	0.0943933	0.0943933	0.0577551	0.146697	0.0943933	0.0943933	0.146697	0.0388839	0.366244	0.179876	0.242416
MATRISOME	1028	5137628	17.3904	11	-0.198916	0.974835	100	81.8182	INHBA (3.07 %) SEMA3B (1.23 %) VEGFC (1.23 %) GPC3 (0.61 %) SEMA3F (0.61 %) HYAL1 (0.61 %) MST1 (0.61 %)	0.0196347	0.0388839	0.0577551	0.0762558	0.0196347	0.426066	0.448383	0.61397	0.353551	0.327397	0.179876	0.0577551	0.529303	0.0577551	0.51026	0.437335	0.146697	0.112175	0.0577551	0.0943933	0.366244	0.0388839	0.0577551	0.0762558	0.146697	0.163451	0.28617	0.163451	0.195979	0.0943933	0.0943933	0.0577551	0.146697	0.0943933	0.0943933	0.146697	0.0388839	0.366244	0.179876	0.242416
[truncated: 197 more rows]
[truncated: 123 more columns]

## Sheet: InputToPATHscore WebTool
hugo_symbol	entrez_id	patient_id
ABL1	25	16770
ABL1	25	16646
ABL2	27	17741
ACVR1B	91	16915
ACVR1B	91	17769
ACVR1C	130399	16678
ACVR2B	93	16835
ACVRL1	94	17210
ACVRL1	94	16628
ADRBK2	157	16632
AIFM3	150209	16949
AIFM3	150209	17216
AKT1	207	16668
AKT1	207	16947
AKT3	10000	16660
[truncated: 998 more rows]

## Sheet: PATHscore
pathway_name	url	p_value	n_effective	n_actual	n_patients	pc_patients	n_genes_mutated	n_genes_total	genes_mutated_pc	gene_len_min_kbp	shortest_gene(s)	gene_len_max_kbp	longest_gene(s)	gene_len_avg_kbp	gene_len_variance
[truncated: 497 more rows]

[truncated: 1 more sheets: Comparison]
