# Supplementary material for: Pathway-based dissection of the genomic heterogeneity of cancer hallmarks’ acquisition with SLAPenrich
Source: Sci Rep. 2018 Apr 30;8:6713. doi: 10.1038/s41598-018-25076-6 (PMC5928049; doi:10.1038/s41598-018-25076-6)
Supplement: Supplementary file 6 — Supplementary Table S4 [file 41598_2018_25076_MOESM6_ESM.xlsx]

## Sheet: Additional File 2 - SmokersVsNo
Differentially enriched pathways	SS_CurrentSmoker	SS_Never	Diff.SL.Enrich
Activation Of RAS In B Cells	12.8828	0.975911	11.9069
MEK Activation	11.8515	0.641068	11.2104
RAF Activation	11.8515	0.641068	11.2104
Estrogen Responsive Protein Efp Controls Cell Cycl ...	12.8828	2.44194	10.4408
Telomeres Telomerase Cellular Aging And Immortalit ...	12.8828	3.03443	9.84835
Btg Family Proteins And Cell Cycle Regulation	12.7044	2.37522	10.3291
Regulation Of Transcriptional Activity By Pml	12.7044	2.37522	10.3291
Activation Of NOXA And Translocation To Mitochondr ...	12.8828	2.66746	10.2153
Activation Of PUMA And Translocation To Mitochondr ...	12.8828	2.66746	10.2153
PLK3 Signaling Events	12.8828	2.83823	10.0445
P38MAPK Events	10.5799	0.481823	10.098
Overview Of Telomerase Protein Component Gene Hter ...	11.9884	1.9242	10.0642
Activation Of BH3-only Proteins	11.5639	1.83736	9.72652
Hypoxic And Oxygen Homeostasis Regulation Of HIF-1 ...	11.8515	2.16868	9.68277
Signaling Events Mediated By HDAC Class III	11.2333	2.03128	9.20203
LKB1 Signaling Events	9.42417	0.340469	9.0837
Signaling Mediated By P38-alpha And P38-beta	10.6895	1.91966	8.76981
Ras Signaling In The CD4+ TCR Pathway	8.6207	0.123018	8.49769
Oncogene Induced Senescence	9.27573	0.986278	8.28945
Intrinsic Pathway For Apoptosis	9.74901	1.48902	8.25999
P53 Signaling Pathway	9.37292	1.42019	7.95274
Signalling To P38 Via RIT And RIN	7.7732	0	7.7732
AMPK Inhibits ChREBP Transcriptional Activation Ac ...	7.0442	0	7.0442
Activated AMPK Stimulates Fatty-acid Oxidation In ...	7.0442	0	7.0442
Regulation Of Ras Family Activation	7.41559	0	7.41559
AP-1 Transcription Factor Network	8.28558	0.814889	7.47069
Chaperones Modulate Interferon Signaling Pathway	8.57569	1.25999	7.3157
C-MYB Transcription Factor Network	7.27489	0.00138016	7.27351
Validated Targets Of C-MYC Transcriptional Activat ...	8.22776	0.986438	7.24132
P53 Pathway Feedback Loops 1	8.37387	1.22058	7.15329
Trk Receptor Signaling Mediated By The MAPK Pathwa ...	6.67635	0	6.67635
Signaling By FGFR Mutants	6.41036	0	6.41036
Prolonged ERK Activation Events	6.41036	0	6.41036
CXCR3-mediated Signaling Events	6.59858	0.0192652	6.57931
DNA Damage/Telomere Stress Induced Senescence	8.82286	2.30843	6.51442
Downstream Signaling In NaÌøve CD8+ T Cells	6.20883	0	6.20883
Plasma Membrane Estrogen Receptor Signaling	6.24723	0	6.24723
EPHB Forward Signaling	5.82333	0	5.82333
Double Stranded Rna Induced Gene Expression	7.27489	1.21916	6.05573
Signaling By Leptin	5.58829	0	5.58829
FCERI Mediated MAPK Activation	5.38098	0	5.38098
ATM Mediated Phosphorylation Of Repair Proteins// ...	7.79313	2.03483	5.7583
Oxidative Stress Induced Senescence	6.03152	0.403894	5.62762
Homologous Recombination Repair// Homologous Recom ...	7.26374	1.63746	5.62627
Trk Receptor Signaling Mediated By PI3K And PLC-ga ...	5.24136	0	5.24136
Hypoxia And P53 In The Cardiovascular System	6.69905	1.26425	5.43481
GMCSF-mediated Signaling Events	5.09248	0	5.09248
Rb Tumor Suppressor/checkpoint Signaling In Respon ...	7.27489	1.90003	5.37487
ErbB2/ErbB3 Signaling Events	4.94214	0	4.94214
Apoptotic Signaling In Response To Dna Damage	7.17132	1.86594	5.30538
Signalling To ERKs	4.81707	0	4.81707
Class I PI3K Signaling Events	5.11427	0.00726693	5.10701
TCR Signaling In NaÌøve CD8+ T Cells	4.76723	0	4.76723
BARD1 Signaling Events	6.0166	1.10053	4.91607
Aurora A Signaling	5.48209	0.636085	4.846
P75(NTR)-mediated Signaling	5.16323	0.399245	4.76398
Interleukin-2 Signaling	4.38046	0	4.38046
Regulation Of Cell Cycle Progression By Plk3	6.28061	1.62887	4.65174
MTOR Signaling Pathway	4.26602	0	4.26602
Signaling By Insulin Receptor	3.97531	0	3.97531
Double-Strand Break Repair	5.82333	1.26425	4.55909
G2/M Checkpoints	6.13634	1.58626	4.55008
P53 Pathway By Glucose Deprivation	5.21784	0.756722	4.46112
Role Of Brca1 Brca2 And Atr In Cancer Susceptibili ...	5.54539	1.20173	4.34366
Cellular Responses To Stress// Cellular Senescence	4.7952	0.433604	4.3616
IGF1R Signaling Cascade// Insulin Receptor Signall ...	3.58314	0	3.58314
Factors Involved In Megakaryocyte Development And ...	5.67194	1.45684	4.2151
P53 Pathway	5.24444	1.11826	4.12617
DNA Repair	4.97475	0.837905	4.13684
Glucocorticoid Receptor Regulatory Network	4.35625	0.245389	4.11086
TCR Signaling In NaÌøve CD4+ T Cells	4.02358	0	4.02358
Hemostasis	4.35625	0.275838	4.08041
IL2-mediated Signaling Events	3.464	0	3.464
Cell Cycle Checkpoints	4.96001	1.03732	3.92269
Autodegradation Of The E3 Ubiquitin Ligase COP1// ...	4.81707	0.996959	3.82011
PDGFR-beta Signaling Pathway	4.12567	0.814889	3.31078
Neurotrophic Factor-mediated Trk Receptor Signalin ...	3.48157	0.310496	3.17108
Atm Signaling Pathway	4.55662	1.42359	3.13303
Tumor Suppressor Arf Inhibits Ribosomal Biogenesis	4.94214	1.80731	3.13484
Energy Dependent Regulation Of MTOR By LKB1-AMPK// ...	2.01954	0	2.01954
Cell Cycle: G2/m Checkpoint	3.58314	0.675238	2.90791
Cell Cycle: G1/s Check Point	4.27242	1.58433	2.68809
GRB2 Events In ERBB2 Signaling// SHC1 Events In ER ...	8.89924	6.30661	2.59263
Insulin/IGF Pathway-protein Kinase B Signaling Cas ...	2.24999	0	2.24999
PKB-mediated Events	1.53244	0	1.53244
Direct P53 Effectors	5.48054	2.98541	2.49512
Apoptosis	2.00676	0	2.00676
Gastrin-CREB Signalling Pathway Via PKC And MAPK	7.95597	5.91572	2.04025
EGFR Transactivation By Gastrin	12.8828	10.4253	2.4575
Signaling By Interleukins	1.4947	0	1.4947
Signaling By ERBB4	4.62368	2.74009	1.8836
Pre-NOTCH Expression And Processing	1.53244	0	1.53244
Pre-NOTCH Transcription And Translation	1.53244	0	1.53244
Signaling By NOTCH	1.30854	0	1.30854
Adaptive Immune System	3.48157	1.83889	1.64268
SHP2 Signaling	5.82232	4.2725	1.54981
NGF Signalling Via TRKA From The Plasma Membrane	3.19519	1.70688	1.48831
P53 Pathway Feedback Loops 2	1.78189	0.532299	1.24959
Signaling By SCF-KIT	3.65773	2.27442	1.38331
Signaling By Constitutively Active EGFR	10.201	8.66586	1.53512
Signaling By NGF	2.56648	1.4168	1.14967
Downstream Signaling Events Of B Cell Receptor (BC ...	4.25623	2.9485	1.30773
Fc Epsilon Receptor (FCERI) Signaling	3.23533	2.0579	1.17743
Axon Guidance	4.75297	3.67194	1.08103
Developmental Biology	2.9347	2.23005	0.70465
Innate Immune System	2.00676	1.70688	0.299879
GRB2 Events In EGFR Signaling// RAF/MAP Kinase Cas ...	6.28061	5.96863	0.311978
DAP12 Interactions// DAP12 Signaling// Downstream ...	2.31615	2.25816	0.0579926
Internalization Of ErbB1	7.20658	6.95308	0.253499
EGF Receptor (ErbB1) Signaling Pathway	6.78587	6.75381	0.0320646
ErbB1 Downstream Signaling	5.24136	5.96592	-0.724564
Constitutive PI3K/AKT Signaling In Cancer// GAB1 S ...	0.0819411	2.37522	-2.29328
EGF Receptor Signaling Pathway	0	2.33303	-2.33303
Signaling Events Mediated By PTP1B	0	2.98541	-2.98541
Thromboxane A2 Receptor Signaling	0	3.1643	-3.1643
Ca-dependent Events// CaM Pathway// DAG And IP3 Si ...	0.760471	4.52601	-3.76554
Role Of Erbb2 In Signal Transduction And Oncology	0.0418366	3.79139	-3.74956
Keratinocyte Differentiation	0	3.38253	-3.38253
Signaling Events Mediated By TCPTP	0	3.38959	-3.38959
LPA Receptor Mediated Events	0	4.28367	-4.28367
Trefoil Factors Initiate Mucosal Healing	0	4.44826	-4.44826
Agrin In Postsynaptic Differentiation	0	4.81821	-4.81821
Role Of Egf Receptor Transactivation By Gpcrs In C ...	0	4.85881	-4.85881
A6b1 And A6b4 Integrin Signaling	0	4.81821	-4.81821
Posttranslational Regulation Of Adherens Junction ...	0	4.92065	-4.92065
Egf Signaling Pathway	0	4.91062	-4.91062
E-cadherin Signaling In Keratinocytes	0	5.08198	-5.08198
Angiotensin Ii Mediated Activation Of Jnk Pathway ...	0	5.19153	-5.19153
Stabilization And Expansion Of The E-cadherin Adhe ...	0	5.74846	-5.74846
ErbB Receptor Signaling Network	0.306872	6.30654	-5.99967
Regulation Of Telomerase	0.0631104	6.2451	-6.18199
Negative Regulation Of FGFR Signaling	0.0646835	6.2451	-6.18042
Mcalpain And Friends In Cell Motility	0	6.2451	-6.2451
Spry Regulation Of FGF Signaling	0	6.30654	-6.30654
Arf6 Signaling Events	0	6.93709	-6.93709
Gab1 Signalosome	0	6.93709	-6.93709
Signal Transduction By L1	0.0468448	7.29087	-7.24403
Sprouty Regulation Of Tyrosine Kinase Signals	0	7.10456	-7.10456
Cbl Mediated Ligand-induced Downregulation Of Egf ...	0	7.46084	-7.46084
Syndecan-3-mediated Signaling Events	0.0631104	7.76922	-7.70611
Urokinase-type Plasminogen Activator (uPA) And UPA ...	0	7.76922	-7.76922
Signaling By EGFR	0.0531649	8.67625	-8.62308
EGFR-dependent Endothelin Signaling Events	0.0631104	8.67625	-8.61314
Map Kinase Inactivation Of Smrt Corepressor	0.0631104	8.67625	-8.61314
Grb2 Events In EGFR Signaling// Shc Events In EGFR ...	0.120476	8.82836	-8.70789
DPP-SCW_signaling_pathway	0.347926	9.6919	-9.34398
EGFR Downregulation	0.347926	9.6919	-9.34398
