# Supplementary material for: Pathway-based dissection of the genomic heterogeneity of cancer hallmarks’ acquisition with SLAPenrich
Source: Sci Rep. 2018 Apr 30;8:6713. doi: 10.1038/s41598-018-25076-6 (PMC5928049; doi:10.1038/s41598-018-25076-6)
Supplement: Supplementary file 7 — Supplementary Table S5 [file 41598_2018_25076_MOESM7_ESM.xlsx]

## Sheet: Additional File 3 - nonMucinous
Differentially enriched pathways	BAC_Type_nonMucinous	BAC_Type_Mucinous	Diff.SL.Enrich
DPP-SCW_signaling_pathway	8.24466	2.0067	6.23795
EGFR Downregulation	8.24466	2.0067	6.23795
Grb2 Events In EGFR Signaling// Shc Events In EGFR ...	7.2541	1.67686	5.57724
PLK3 Signaling Events	5.77076	0.131631	5.63913
EGFR-dependent Endothelin Signaling Events	7.09817	1.56554	5.53263
Map Kinase Inactivation Of Smrt Corepressor	7.09817	1.56554	5.53263
Signaling By EGFR	7.09817	1.55501	5.54316
Activation Of NOXA And Translocation To Mitochondr ...	5.52262	0.125624	5.397
Activation Of PUMA And Translocation To Mitochondr ...	5.52262	0.125624	5.397
Arf6 Signaling Events	6.25779	0.898188	5.3596
Estrogen Responsive Protein Efp Controls Cell Cycl ...	5.09052	0.0637244	5.02679
Syndecan-3-mediated Signaling Events	5.77076	0.73151	5.03925
Urokinase-type Plasminogen Activator (uPA) And UPA ...	6.13485	1.18937	4.94548
Btg Family Proteins And Cell Cycle Regulation	4.96795	0.0505778	4.91737
Regulation Of Transcriptional Activity By Pml	4.96795	0.0505778	4.91737
Mcalpain And Friends In Cell Motility	5.52262	0.64427	4.87835
Cbl Mediated Ligand-induced Downregulation Of Egf ...	5.81004	1.09732	4.71272
Signal Transduction By L1	5.65614	1.04221	4.61394
Gab1 Signalosome	6.25795	1.8553	4.40265
Sprouty Regulation Of Tyrosine Kinase Signals	5.52262	0.970801	4.55182
Signaling Events Mediated By HDAC Class III	4.19622	0	4.19622
P53 Signaling Pathway	3.99822	0	3.99822
Overview Of Telomerase Protein Component Gene Hter ...	4.00735	0	4.00735
Signaling Mediated By P38-alpha And P38-beta	3.99822	0	3.99822
Regulation Of Telomerase	5.04071	0.929323	4.11139
Activation Of BH3-only Proteins	3.81628	0	3.81628
ErbB Receptor Signaling Network	4.58353	0.675615	3.90792
Posttranslational Regulation Of Adherens Junction ...	3.59371	0.0498438	3.54386
Hypoxic And Oxygen Homeostasis Regulation Of HIF-1 ...	4.49636	0.80954	3.68682
Factors Involved In Megakaryocyte Development And ...	3.08398	0	3.08398
Intrinsic Pathway For Apoptosis	3.13234	0	3.13234
Stabilization And Expansion Of The E-cadherin Adhe ...	3.95415	0.465269	3.48888
Ca-dependent Events// CaM Pathway// DAG And IP3 Si ...	3.5373	0.146503	3.3908
P53 Pathway Feedback Loops 1	3.5373	0.218324	3.31898
Tumor Suppressor Arf Inhibits Ribosomal Biogenesis	3.0411	0	3.0411
Negative Regulation Of FGFR Signaling	5.06038	1.77247	3.28791
Signaling Events Mediated By TCPTP	3.07848	0	3.07848
Angiotensin Ii Mediated Activation Of Jnk Pathway ...	3.42058	0.288069	3.13251
Chaperones Modulate Interferon Signaling Pathway	2.6896	0	2.6896
Spry Regulation Of FGF Signaling	5.58871	2.52989	3.05882
E-cadherin Signaling In Keratinocytes	3.30183	0.257553	3.04427
Double Stranded Rna Induced Gene Expression	2.61112	0	2.61112
Oncogene Induced Senescence	3.01593	0.125624	2.89031
Egf Signaling Pathway	3.13234	0.23861	2.89373
Role Of Egf Receptor Transactivation By Gpcrs In C ...	3.08214	0.222125	2.86002
Agrin In Postsynaptic Differentiation	3.0411	0.217611	2.82349
A6b1 And A6b4 Integrin Signaling	3.0411	0.217611	2.82349
Atm Signaling Pathway	2.38835	0	2.38835
Aurora A Signaling	2.21542	0	2.21542
Trefoil Factors Initiate Mucosal Healing	2.68501	0.134332	2.55068
Keratinocyte Differentiation	2.37106	0	2.37106
DNA Damage/Telomere Stress Induced Senescence	2.79433	0.256912	2.53742
LPA Receptor Mediated Events	2.53011	0.125624	2.40448
Thromboxane A2 Receptor Signaling	2.17074	0	2.17074
Cell Cycle: G1/s Check Point	1.98206	0	1.98206
ATM Mediated Phosphorylation Of Repair Proteins// ...	2.40205	0.162502	2.23955
Hypoxia And P53 In The Cardiovascular System	2.01435	0	2.01435
Role Of Erbb2 In Signal Transduction And Oncology	2.11627	0.0357811	2.08049
Rb Tumor Suppressor/checkpoint Signaling In Respon ...	2.20946	0.125624	2.08384
Validated Targets Of C-MYC Transcriptional Activat ...	2.17828	0.125624	2.05266
Apoptotic Signaling In Response To Dna Damage	2.17074	0.125624	2.04512
Insulin/IGF Pathway-protein Kinase B Signaling Cas ...	1.54255	0	1.54255
LKB1 Signaling Events	2.25091	0.20763	2.04328
Glucocorticoid Receptor Regulatory Network	1.37398	0	1.37398
Oxidative Stress Induced Senescence	1.76023	0	1.76023
P75(NTR)-mediated Signaling	1.74502	0	1.74502
Direct P53 Effectors	4.04502	2.11515	1.92987
Cell Cycle Checkpoints	1.64977	0	1.64977
AP-1 Transcription Factor Network	1.85973	0.0605101	1.79922
Homologous Recombination Repair// Homologous Recom ...	1.85527	0.0605101	1.79476
Autodegradation Of The E3 Ubiquitin Ligase COP1// ...	1.58142	0	1.58142
Regulation Of Cell Cycle Progression By Plk3	1.84006	0.057162	1.7829
Signaling Events Mediated By PTP1B	1.98578	0.146503	1.83928
G2/M Checkpoints	1.7841	0.0498438	1.73425
P53 Pathway By Glucose Deprivation	1.77324	0.0462547	1.72698
DNA Repair	1.31861	0	1.31861
Double-Strand Break Repair	1.3327	0	1.3327
P53 Pathway	1.77852	0.256912	1.52161
EGFR Transactivation By Gastrin	12.3678	10.8376	1.53019
GRB2 Events In EGFR Signaling// RAF/MAP Kinase Cas ...	7.06841	6.12797	0.940445
Signaling By Constitutively Active EGFR	9.41323	8.48419	0.929039
Axon Guidance	3.70321	3.09555	0.607658
Internalization Of ErbB1	7.2541	6.8323	0.421803
EGF Receptor (ErbB1) Signaling Pathway	7.09817	6.64612	0.452055
Innate Immune System	2.48701	2.2515	0.235507
GRB2 Events In ERBB2 Signaling// SHC1 Events In ER ...	6.55176	6.43026	0.121505
Developmental Biology	2.01435	1.90275	0.111594
Gastrin-CREB Signalling Pathway Via PKC And MAPK	5.95265	6.07266	-0.120008
Downstream Signaling Events Of B Cell Receptor (BC ...	3.15935	3.21363	-0.0542781
Signaling By ERBB4	2.94206	3.06186	-0.119804
Signaling By SCF-KIT	2.33445	2.59605	-0.2616
Fc Epsilon Receptor (FCERI) Signaling	2.08131	2.39577	-0.31446
Adaptive Immune System	1.79739	2.16271	-0.36532
ErbB1 Downstream Signaling	5.59247	6.27282	-0.680347
NGF Signalling Via TRKA From The Plasma Membrane	2.17074	2.92457	-0.753827
DAP12 Interactions// DAP12 Signaling// Downstream ...	2.04753	2.80754	-0.760009
Signaling By NGF	1.7841	2.58582	-0.801719
Regulation Of Ras Family Activation	2.64468	3.88304	-1.23837
IGF1R Signaling Cascade// Insulin Receptor Signall ...	0.646595	2.16968	-1.52309
Signaling By Insulin Receptor	0.776159	2.34791	-1.57175
Telomeres Telomerase Cellular Aging And Immortalit ...	5.20474	6.5871	-1.38236
SHP2 Signaling	4.00735	5.72242	-1.71507
Interleukin-2 Signaling	0.568098	2.92457	-2.35647
TCR Signaling In NaÌøve CD4+ T Cells	0.0437953	2.43648	-2.39268
Class I PI3K Signaling Events	0.0709085	2.58582	-2.51491
FCERI Mediated MAPK Activation	0.10509	2.68185	-2.57676
Regulation Of Nuclear Beta Catenin Signaling And T ...	0	2.05838	-2.05838
PDGFR-beta Signaling Pathway	0.244197	2.96101	-2.71681
TCR Signaling In NaÌøve CD8+ T Cells	0.264892	3.08272	-2.81783
Cytokine Signaling In Immune System	0	2.65606	-2.65606
EPHB Forward Signaling	0.326948	3.18921	-2.86227
Trk Receptor Signaling Mediated By PI3K And PLC-ga ...	0.383462	3.26827	-2.8848
IL2-mediated Signaling Events	0.162852	3.08272	-2.91987
Signaling By FGFR Mutants	1.56936	4.5941	-3.02474
Signaling By Interleukins	0.10509	3.20309	-3.098
Plasma Membrane Estrogen Receptor Signaling	0.840714	4.15624	-3.31553
GMCSF-mediated Signaling Events	0.556457	3.89535	-3.33889
CXCR3-mediated Signaling Events	0.943439	4.33158	-3.38814
ErbB2/ErbB3 Signaling Events	0.0693393	3.42449	-3.35515
Neurotrophic Factor-mediated Trk Receptor Signalin ...	0.498403	4.12412	-3.62572
Signalling To ERKs	0.139536	3.77871	-3.63917
MTOR Signaling Pathway	0.168908	3.88304	-3.71413
P38MAPK Events	2.11172	6.12797	-4.01624
Prolonged ERK Activation Events	0.441325	4.5941	-4.15277
Signaling By Leptin	0.445997	4.5941	-4.1481
Trk Receptor Signaling Mediated By The MAPK Pathwa ...	0.498403	4.67948	-4.18108
MEK Activation	2.46021	6.5871	-4.12689
RAF Activation	2.46021	6.5871	-4.12689
Downstream Signaling In NaÌøve CD8+ T Cells	0.59834	4.8948	-4.29647
Signalling To P38 Via RIT And RIN	0.750897	5.24653	-4.49564
C-MYB Transcription Factor Network	0.871297	5.48942	-4.61812
Activation Of RAS In B Cells	3.22771	7.5153	-4.2876
Ras Signaling In The CD4+ TCR Pathway	1.24919	6.12797	-4.87878
