# Supplementary material for: Pathway-based dissection of the genomic heterogeneity of cancer hallmarks’ acquisition with SLAPenrich
Source: Sci Rep. 2018 Apr 30;8:6713. doi: 10.1038/s41598-018-25076-6 (PMC5928049; doi:10.1038/s41598-018-25076-6)
Supplement: Supplementary file 8 — Supplementary Table S6 [file 41598_2018_25076_MOESM8_ESM.xlsx]

## Sheet: BRCA
Pathway	Internal Id	n.genes.in.rep	total Exonic Content Block length	(E)xpected n.mut in path	(O)bserved n.mut in path	log10 (oddRatio=(O/E))	pval	% FDR	ExclusiveCoverage	Mutated Genes	prob BB12T	prob BB13T	prob BB14T	prob BB15T	prob BB16T	prob BB1T	prob BB20T	prob BB21T	prob BB22T	prob BB23T	prob BB24T	prob BB27T	prob BB28T	prob BB29T	prob BB30T	prob BB31T	prob BB32T	prob BB33T	prob BB35T	prob BB38T	prob BB3T	prob BB43T	prob BB4T	prob BB5T	prob BB7T	prob BB9T	prob BR-M-005	prob BR-M-026	prob BR-M-027	prob BR-M-028	prob BR-M-030	prob BR-M-034	prob BR-M-036	prob BR-M-037	prob BR-M-038	prob BR-M-041	prob BR-M-045	prob BR-M-047	prob BR-M-048
EGFR1	30	475	3242934	683.241	934	0.135773	1.24598e-14	7.023e-12	38.0086	TP53 (32.155 %) PIK3CA (30.565 %) CDH1 ( 6.095 %) PTEN ( 3.092 %) AKT1 ( 2.739 %) HUWE1 ( 1.943 %) AHNAK ( 1.855 %) ERBB2 ( 1.502 %) PLCE1 ( 1.413 %) DSP ( 1.325 %) ERBB3 ( 1.325 %) MTOR ( 1.325 %) TLN1 ( 1.325 %) FLNB ( 1.237 %) PLEC ( 1.060 %) ITSN2 ( 0.972 %) ARHGAP5 ( 0.883 %) CBLB ( 0.883 %) DOCK4 ( 0.883 %) NCOA3 ( 0.883 %) PIK3R1 ( 0.883 %) ARHGAP35 ( 0.795 %) BRAF ( 0.795 %) EGFR ( 0.795 …	0.191613	0.322927	0.0684495	0.0348314	0.0348314	0.100897	0.0684495	0.0348314	0.132214	0.391242	0.0348314	0.191613	0.100897	0.0348314	0.100897	0.0348314	0.132214	0.0684495	0.0348314	0.0684495	0.0348314	0.0348314	0.132214	0.191613	0.191613	0.21977	0.490128	0.572952	0.830113	0.525029	0.490128	0.452663	0.298493	0.993716	0.412446	0.83603	0.965541	0.880823	0.322927
G1 To S Cell Cycle Control	59	6	37551	17.7342	382	1.33325	1.90596e-14	7.023e-12	97.9058	TP53 (32.155 %) ATM ( 2.032 %) MYC ( 0.177 %) CDC25A ( 0.088 %)	0.00261349	0.00478618	0.000871924	0.000436057	0.000436057	0.0013076	0.000871924	0.000436057	0.00174309	0.00608753	0.000436057	0.00261349	0.0013076	0.000436057	0.0013076	0.000436057	0.00174309	0.000871924	0.000436057	0.000871924	0.000436057	0.000436057	0.00174309	0.00261349	0.00261349	0.00304841	0.00825265	0.0104131	0.0215715	0.00911738	0.00825265	0.00738717	0.00435203	0.0604646	0.00652093	0.0219982	0.0405878	0.0258297	0.00478618
P53 Pathway Feedback Loops 2	164	42	307798	124.936	728	0.765445	1.95196e-14	7.023e-12	75.5495	TP53 (32.155 %) PIK3CA (30.565 %) PTEN ( 3.092 %) AKT1 ( 2.739 %) ATM ( 2.032 %) RB1 ( 2.032 %) ATR ( 1.590 %) PIK3R1 ( 0.883 %) PIK3CB ( 0.707 %) KRAS ( 0.618 %) PIK3C2B ( 0.618 %) PIK3CG ( 0.618 %) RBL1 ( 0.530 %) CCNA2 ( 0.442 %) PIK3C2G ( 0.442 %) AKT2 ( 0.353 %) AKT3 ( 0.353 %) PIK3CD ( 0.353 %) NRAS ( 0.265 %) PIK3C2A ( 0.265 %) PIK3C3 ( 0.265 %) PPP2CB ( 0.265 %) SIAH1 ( 0.265 %) TP63 ( 0.…	0.0201219	0.0365806	0.00675281	0.00338213	0.00338213	0.0101121	0.00675281	0.00338213	0.01346	0.0463228	0.00338213	0.0201219	0.0101121	0.00338213	0.0101121	0.00338213	0.01346	0.00675281	0.00338213	0.00675281	0.00338213	0.00338213	0.01346	0.0201219	0.0201219	0.023436	0.0623414	0.0780909	0.155823	0.0686732	0.0623414	0.0559665	0.0333111	0.383973	0.0495482	0.158678	0.275191	0.183943	0.0365806
PI3 Kinase Pathway	98	38	271752	102.766	454	0.645206	1.96808e-14	7.023e-12	89.207	PIK3CA (30.565 %) PTEN ( 3.092 %) AKT1 ( 2.739 %) PIK3R1 ( 0.883 %) PIK3CB ( 0.707 %) JAK2 ( 0.618 %) SOS1 ( 0.618 %) INPPL1 ( 0.530 %) INSR ( 0.530 %) SOS2 ( 0.442 %) AKT2 ( 0.353 %) AKT3 ( 0.353 %) FOXO4 ( 0.353 %) NOS3 ( 0.353 %) RPS6KB1 ( 0.353 %) RPS6KB2 ( 0.353 %) GNB2 ( 0.265 %) GNB3 ( 0.265 %) IRS1 ( 0.265 %) NRAS ( 0.265 %) PIK3R3 ( 0.177 %) PTGER1 ( 0.177 %) FOXO1 ( 0.088 %) FOXO3 ( 0.0…	0.0162476	0.0295854	0.00544547	0.00272645	0.00272645	0.00815707	0.00544547	0.00272645	0.0108613	0.0375012	0.00272645	0.0162476	0.00815707	0.00272645	0.00815707	0.00272645	0.0108613	0.00544547	0.00272645	0.00544547	0.00272645	0.00272645	0.0108613	0.0162476	0.0162476	0.0189298	0.0505509	0.0634236	0.127601	0.055721	0.0505509	0.0453524	0.0269324	0.323224	0.0401254	0.12998	0.22846	0.151097	0.0295854
BARD1 Signaling Events	308	29	200354	86.7485	435	0.700227	1.98353e-14	7.023e-12	88.2759	TP53 (32.155 %) ATM ( 2.032 %) ATR ( 1.590 %) BRCA1 ( 1.325 %) PRKDC ( 0.972 %) EWSR1 ( 0.618 %) FANCA ( 0.618 %) TOPBP1 ( 0.618 %) FANCD2 ( 0.530 %) RAD50 ( 0.442 %) BARD1 ( 0.265 %) FANCC ( 0.265 %) RAD51 ( 0.265 %) RBBP8 ( 0.265 %) BACH1 ( 0.177 %) CCNE1 ( 0.177 %) CDK2 ( 0.177 %) FANCE ( 0.177 %) FANCF ( 0.177 %) FANCG ( 0.177 %) XRCC6 ( 0.177 %) FANCL ( 0.088 %) NBN ( 0.088 %) UBE2D3 ( 0.088…	0.0135337	0.0246717	0.00453173	0.00226844	0.00226844	0.00678989	0.00453173	0.00226844	0.00904293	0.0312941	0.00226844	0.0135337	0.00678989	0.00226844	0.00678989	0.00226844	0.00904293	0.00453173	0.00226844	0.00453173	0.00226844	0.00226844	0.00904293	0.0135337	0.0135337	0.0157714	0.0422316	0.0530456	0.107341	0.046572	0.0422316	0.0378715	0.0224542	0.277296	0.0334915	0.109366	0.19406	0.127385	0.0246717
Trk Receptor Signaling Mediated By PI3K And PLC Gamma	136	36	228615	94.3119	424	0.652799	2.03056e-14	7.023e-12	91.5094	PIK3CA (30.565 %) AKT1 ( 2.739 %) PIK3R1 ( 0.883 %) KRAS ( 0.618 %) PLCG1 ( 0.618 %) SOS1 ( 0.618 %) TRPC3 ( 0.618 %) EPB41L1 ( 0.442 %) NTRK1 ( 0.442 %) GAB1 ( 0.353 %) NRAS ( 0.265 %) PRKCD ( 0.265 %) STAT5A ( 0.265 %) AGAP2 ( 0.177 %) CAMK2A ( 0.177 %) CREB1 ( 0.177 %) GRB2 ( 0.177 %) NGF ( 0.177 %) CAMK4 ( 0.088 %) CCND1 ( 0.088 %) EGR1 ( 0.088 %) FOXO3 ( 0.088 %) GSK3B ( 0.088 %) HRAS ( 0.08…	0.0148064	0.0269775	0.00496003	0.0024831	0.0024831	0.00743082	0.00496003	0.0024831	0.00989546	0.0342078	0.0024831	0.0148064	0.00743082	0.0024831	0.00743082	0.0024831	0.00989546	0.00496003	0.0024831	0.00496003	0.0024831	0.0024831	0.00989546	0.0148064	0.0148064	0.0172527	0.0461392	0.0579232	0.116893	0.0508704	0.0461392	0.0413845	0.0245554	0.299194	0.036606	0.119086	0.210368	0.138578	0.0269775
DNA Damage/Telomere Stress Induced Senescence	208	64	172030	60.58	442	0.863093	2.03335e-14	7.023e-12	91.1765	TP53 (32.155 %) ATM ( 2.032 %) CDKN1B ( 0.883 %) HIST1H2BC ( 0.530 %) CCNA2 ( 0.442 %) EP400 ( 0.442 %) RAD50 ( 0.442 %) HIST1H2BD ( 0.353 %) HIST2H2BE ( 0.353 %) TERF2 ( 0.353 %) HIST1H2AC ( 0.265 %) HIST1H2AJ ( 0.265 %) HIST1H2BH ( 0.265 %) HIST1H4L ( 0.265 %) POT1 ( 0.265 %) ACD ( 0.177 %) CCNE1 ( 0.177 %) CCNE2 ( 0.177 %) CDK2 ( 0.177 %) H2AFZ ( 0.177 %) HIST1H2AE ( 0.177 %) HIST1H2BB ( 0.177…	0.00924847	0.0168902	0.00309238	0.00154739	0.00154739	0.00463498	0.00309238	0.00154739	0.00617519	0.0214468	0.00154739	0.00924847	0.00463498	0.00154739	0.00463498	0.00154739	0.00617519	0.00309238	0.00154739	0.00309238	0.00154739	0.00154739	0.00617519	0.00924847	0.00924847	0.0107815	0.0289944	0.0364838	0.0745074	0.0319972	0.0289944	0.0259824	0.0153665	0.198642	0.022961	0.0759395	0.136806	0.0887291	0.0168902
Transcriptional Activation Of Cell Cycle Inhibitor P21	135	4	14543	6.05575	366	1.78131	2.07089e-14	7.023e-12	100	TP53 (32.155 %) PCBP4 ( 0.088 %) ZNF385A ( 0.088 %)	0.000883917	0.00161992	0.000294726	0.000147374	0.000147374	0.000442056	0.000294726	0.000147374	0.000589365	0.00206126	0.000147374	0.000883917	0.000442056	0.000147374	0.000442056	0.000147374	0.000589365	0.000294726	0.000147374	0.000294726	0.000147374	0.000147374	0.000589365	0.000883917	0.000883917	0.00103116	0.00279639	0.00353098	0.00734214	0.00309029	0.00279639	0.0025024	0.00147276	0.0208555	0.00220833	0.00748844	0.013904	0.00880409	0.00161992
ErbB Signaling Pathway	33	9	63995	32.9166	389	1.07253	2.0816e-14	7.023e-12	96.6581	TP53 (32.155 %) MTOR ( 1.325 %) CDKN1B ( 0.883 %) RPS6KB1 ( 0.353 %) BCL2L11 ( 0.265 %) MAP2K7 ( 0.177 %) MYC ( 0.177 %) PAK4 ( 0.088 %) PDK1 ( 0.088 %)	0.00491187	0.00898667	0.00163998	0.000820326	0.000820326	0.00245896	0.00163998	0.000820326	0.00327727	0.0114235	0.000820326	0.00491187	0.00245896	0.000820326	0.00245896	0.000820326	0.00327727	0.00163998	0.000820326	0.00163998	0.000820326	0.000820326	0.00327727	0.00491187	0.00491187	0.00572817	0.0154717	0.0195032	0.0402027	0.0170863	0.0154717	0.0138544	0.00817305	0.11073	0.0122345	0.04099	0.0750013	0.0480472	0.00898667
Regulation Of TP53 Activity Through Association With Co Factors	168	14	102022	49.3975	414	0.923295	2.10633e-14	7.023e-12	96.6184	TP53 (32.155 %) AKT1 ( 2.739 %) TP53BP2 ( 0.442 %) AKT2 ( 0.353 %) AKT3 ( 0.353 %) PHF20 ( 0.353 %) POU4F2 ( 0.353 %) PPP1R13B ( 0.265 %) TP63 ( 0.265 %) BANP ( 0.177 %) TP73 ( 0.177 %) PPP1R13L ( 0.088 %) ZNF385A ( 0.088 %)	0.00747198	0.013656	0.00249689	0.00124922	0.00124922	0.00374299	0.00249689	0.00124922	0.00498754	0.0173478	0.00124922	0.00747198	0.00374299	0.00124922	0.00374299	0.00124922	0.00498754	0.00249689	0.00124922	0.00249689	0.00124922	0.00124922	0.00498754	0.00747198	0.00747198	0.00871187	0.0234703	0.0295546	0.0605872	0.0259086	0.0234703	0.0210259	0.0124223	0.163686	0.0185754	0.0617607	0.111971	0.0722568	0.013656
FGF Signaling Pathway	45	15	111093	43.9594	399	0.957921	2.11624e-14	7.023e-12	97.2431	PIK3CA (30.565 %) AKT1 ( 2.739 %) FGFR2 ( 0.618 %) PLCG1 ( 0.618 %) SOS1 ( 0.618 %) FGFR4 ( 0.265 %) MAPK1 ( 0.177 %) MAPK14 ( 0.177 %) MAPK3 ( 0.177 %) FGF1 ( 0.088 %) SHC1 ( 0.088 %) SPRY2 ( 0.088 %)	0.00661965	0.0121025	0.00221144	0.00110633	0.00110633	0.00331532	0.00221144	0.00110633	0.00441798	0.0153777	0.00110633	0.00661965	0.00331532	0.00110633	0.00331532	0.00110633	0.00441798	0.00221144	0.00110633	0.00221144	0.00110633	0.00110633	0.00441798	0.00661965	0.00661965	0.00771866	0.0208123	0.0262168	0.0538434	0.0229777	0.0208123	0.0186421	0.0110084	0.1464	0.0164671	0.0548901	0.0998191	0.064259	0.0121025
Oxidative Stress Induced Senescence	212	120	496461	176.464	505	0.456636	2.15807e-14	7.023e-12	82.5743	TP53 (32.155 %) MAP2K4 ( 3.445 %) HIST1H3B ( 0.883 %) UBC ( 0.795 %) AGO4 ( 0.707 %) TNRC6B ( 0.618 %) AGO1 ( 0.530 %) HIST1H2BC ( 0.530 %) JUN ( 0.530 %) SUZ12 ( 0.530 %) TNRC6C ( 0.442 %) E2F1 ( 0.353 %) HIST1H2BD ( 0.353 %) HIST1H3G ( 0.353 %) HIST2H2BE ( 0.353 %) TNRC6A ( 0.353 %) AGO3 ( 0.265 %) EED ( 0.265 %) HIST1H2AC ( 0.265 %) HIST1H2AJ ( 0.265 %) HIST1H2BH ( 0.265 %) HIST1H3C ( 0.265 %)…	0.0296845	0.0537474	0.00999439	0.00500975	0.00500975	0.0149541	0.00999439	0.00500975	0.0198889	0.0678977	0.00500975	0.0296845	0.0149541	0.00500975	0.0149541	0.00500975	0.0198889	0.00999439	0.00500975	0.00999439	0.00500975	0.00500975	0.0198889	0.0296845	0.0296845	0.0345455	0.0910129	0.113555	0.222069	0.100098	0.0910129	0.0818364	0.048983	0.512368	0.0725673	0.225966	0.379433	0.260174	0.0537474
Tie2 Signaling	294	18	103645	50.1954	385	0.884797	2.17495e-14	7.023e-12	93.5065	PIK3CA (30.565 %) PIK3R1 ( 0.883 %) PIK3CB ( 0.707 %) KRAS ( 0.618 %) SOS1 ( 0.618 %) GRB14 ( 0.442 %) ANGPT4 ( 0.353 %) GRB7 ( 0.353 %) TEK ( 0.353 %) ANGPT1 ( 0.265 %) NRAS ( 0.265 %) ANGPT2 ( 0.177 %) GRB2 ( 0.177 %) PTPN11 ( 0.177 %) DOK2 ( 0.088 %) HRAS ( 0.088 %) SHC1 ( 0.088 %)	0.00759767	0.013885	0.002539	0.00127031	0.00127031	0.00380608	0.002539	0.00127031	0.00507155	0.0176382	0.00127031	0.00759767	0.00380608	0.00127031	0.00380608	0.00127031	0.00507155	0.002539	0.00127031	0.002539	0.00127031	0.00127031	0.00507155	0.00759767	0.00759767	0.00885833	0.0238619	0.0300461	0.0615781	0.0263403	0.0238619	0.0213771	0.0126307	0.166206	0.0188861	0.0627702	0.11375	0.0734311	0.013885
ErbB2/ErbB3 Signaling Events	37	41	294955	123.463	458	0.569329	2.19538e-14	7.023e-12	86.8996	PIK3CA (30.565 %) AKT1 ( 2.739 %) ERBB2 ( 1.502 %) ERBB3 ( 1.325 %) MTOR ( 1.325 %) PIK3R1 ( 0.883 %) DOCK7 ( 0.707 %) PIK3CB ( 0.707 %) JAK2 ( 0.618 %) KRAS ( 0.618 %) SOS1 ( 0.618 %) JUN ( 0.530 %) STAT3 ( 0.530 %) NFATC4 ( 0.353 %) PPP3CB ( 0.353 %) CHRNA1 ( 0.265 %) NRAS ( 0.265 %) NRG1 ( 0.265 %) RNF41 ( 0.265 %) GRB2 ( 0.177 %) MAPK1 ( 0.177 %) MAPK10 ( 0.177 %) MAPK3 ( 0.177 %) MAPK8 ( 0.1…	0.0198602	0.0361088	0.00666439	0.00333776	0.00333776	0.00997991	0.00666439	0.00333776	0.0132844	0.0457283	0.00333776	0.0198602	0.00997991	0.00333776	0.00997991	0.00333776	0.0132844	0.00666439	0.00333776	0.00666439	0.00333776	0.00333776	0.0132844	0.0198602	0.0198602	0.0231317	0.061548	0.0771055	0.153942	0.0678022	0.061548	0.0552519	0.0328807	0.380039	0.0489134	0.156766	0.272119	0.181761	0.0361088
TP53 Regulates Transcription Of Caspase Activators And Caspases	184	12	84046	40.7423	396	0.987649	2.20166e-14	7.023e-12	94.9495	TP53 (32.155 %) ATM ( 2.032 %) NLRC4 ( 0.707 %) APAF1 ( 0.530 %) CASP2 ( 0.353 %) TP63 ( 0.265 %) CASP1 ( 0.177 %) CASP6 ( 0.177 %) PIDD1 ( 0.177 %) TP73 ( 0.177 %) CASP10 ( 0.088 %)	0.00611896	0.0111895	0.00204383	0.00102244	0.00102244	0.00306417	0.00204383	0.00102244	0.00408348	0.0142194	0.00102244	0.00611896	0.00306417	0.00102244	0.00306417	0.00102244	0.00408348	0.00204383	0.00102244	0.00204383	0.00102244	0.00102244	0.00408348	0.00611896	0.00611896	0.00713514	0.0192486	0.0242521	0.0498619	0.021253	0.0192486	0.01724	0.0101774	0.136087	0.0152273	0.0508334	0.0926084	0.0595319	0.0111895
TP53 Regulates Transcription Of Genes Involved In Cytochrome C Release	187	19	114205	50.3945	403	0.902922	2.22942e-14	7.023e-12	95.5335	TP53 (32.155 %) ATM ( 2.032 %) CREBBP ( 0.795 %) TP53BP2 ( 0.442 %) PPP1R13B ( 0.265 %) TP63 ( 0.265 %) ZNF420 ( 0.265 %) AIFM2 ( 0.177 %) BAX ( 0.177 %) BID ( 0.177 %) STEAP3 ( 0.177 %) TP73 ( 0.177 %) BBC3 ( 0.088 %) BNIP3L ( 0.088 %)	0.00762906	0.0139421	0.00254951	0.00127557	0.00127557	0.00382183	0.00254951	0.00127557	0.00509253	0.0177107	0.00127557	0.00762906	0.00382183	0.00127557	0.00382183	0.00127557	0.00509253	0.00254951	0.00127557	0.00254951	0.00127557	0.00127557	0.00509253	0.00762906	0.00762906	0.0088949	0.0239596	0.0301688	0.0618254	0.026448	0.0239596	0.0214648	0.0126827	0.166834	0.0189637	0.0630221	0.114193	0.073724	0.0139421
Apoptosis Signaling Pathway	333	104	663734	220.461	726	0.517606	2.23645e-14	7.023e-12	70.6612	TP53 (32.155 %) PIK3CA (30.565 %) MAP2K4 ( 3.445 %) AKT1 ( 2.739 %) CASP8 ( 1.325 %) MADD ( 1.148 %) PRKCQ ( 1.060 %) PRKCB ( 0.795 %) PIK3CB ( 0.707 %) PIK3CG ( 0.618 %) APAF1 ( 0.530 %) IGF2R ( 0.530 %) JUN ( 0.530 %) HSPA8 ( 0.442 %) RIPK1 ( 0.442 %) AKT2 ( 0.353 %) AKT3 ( 0.353 %) ATF4 ( 0.353 %) ATF6 ( 0.353 %) IKBKB ( 0.353 %) MAP4K3 ( 0.353 %) NFKB1 ( 0.353 %) PIK3CD ( 0.353 %) BCL2L11 ( 0…	0.038513	0.0694717	0.0130061	0.00652433	0.00652433	0.0194456	0.0130061	0.00652433	0.025843	0.0875664	0.00652433	0.038513	0.0194456	0.00652433	0.0194456	0.00652433	0.025843	0.0130061	0.00652433	0.0130061	0.00652433	0.00652433	0.025843	0.038513	0.038513	0.0447861	0.116946	0.145379	0.279122	0.128431	0.116946	0.105309	0.0633608	0.607821	0.0935194	0.283825	0.463046	0.324797	0.0694717
TGF Beta Receptor	176	220	1547821	450.644	808	0.253578	2.23773e-14	7.023e-12	55.8168	TP53 (32.155 %) PIK3CA (30.565 %) AKT1 ( 2.739 %) RUNX1 ( 2.385 %) RB1 ( 2.032 %) CTCF ( 1.855 %) BRCA1 ( 1.325 %) MTOR ( 1.325 %) PIK3R1 ( 0.883 %) CREBBP ( 0.795 %) SPTBN1 ( 0.795 %) EP300 ( 0.707 %) NUP153 ( 0.707 %) NUP214 ( 0.707 %) PARD3 ( 0.707 %) AR ( 0.618 %) CTNNA2 ( 0.618 %) EWSR1 ( 0.618 %) ROCK1 ( 0.618 %) SMAD4 ( 0.618 %) SOS1 ( 0.618 %) XPO1 ( 0.618 %) ZEB1 ( 0.618 %) ZFYVE16 ( 0.6…	0.0974024	0.171283	0.0335826	0.0169347	0.0169347	0.0499486	0.0335826	0.0169347	0.0660375	0.212677	0.0169347	0.0974024	0.0499486	0.0169347	0.0499486	0.0169347	0.0660375	0.0335826	0.0169347	0.0335826	0.0169347	0.0169347	0.0660375	0.0974024	0.0974024	0.112688	0.277122	0.336293	0.574286	0.301398	0.277122	0.252002	0.157008	0.913048	0.22601	0.581495	0.80261	0.641126	0.171283
TP53 Regulates Transcription Of Death Receptors And Ligands	185	12	58774	23.9552	375	1.19463	2.23889e-14	7.023e-12	98.4	TP53 (32.155 %) TP53BP2 ( 0.442 %) PPP1R13B ( 0.265 %) TP63 ( 0.265 %) TNFRSF10D ( 0.177 %) TP73 ( 0.177 %) FAS ( 0.088 %) TNFRSF10B ( 0.088 %)	0.00354839	0.00649576	0.0011842	0.000592274	0.000592274	0.00177577	0.0011842	0.000592274	0.00236699	0.00825999	0.000592274	0.00354839	0.00177577	0.000592274	0.00177577	0.000592274	0.00236699	0.0011842	0.000592274	0.0011842	0.000592274	0.000592274	0.00236699	0.00354839	0.00354839	0.00413856	0.0111934	0.0141182	0.029188	0.0123644	0.0111934	0.0100211	0.00590698	0.0812308	0.00884737	0.029763	0.0547281	0.0349226	0.00649576
ErbB4 Signaling Events	38	35	275214	120.473	439	0.561573	2.25041e-14	7.023e-12	87.6993	PIK3CA (30.565 %) NCOR1 ( 3.534 %) ERBB2 ( 1.502 %) ERBB4 ( 1.060 %) GRIN2B ( 0.972 %) PIK3R1 ( 0.883 %) PIK3CB ( 0.707 %) JAK2 ( 0.618 %) STAT5B ( 0.530 %) ITCH ( 0.442 %) LRIG1 ( 0.265 %) NEDD4 ( 0.265 %) NRG1 ( 0.265 %) STAT5A ( 0.265 %) TAB2 ( 0.265 %) YAP1 ( 0.265 %) GRB2 ( 0.177 %) MAPK1 ( 0.177 %) MAPK3 ( 0.177 %) MDM2 ( 0.177 %) NRG3 ( 0.177 %) PRLR ( 0.177 %) WWP1 ( 0.177 %) ADAM17 ( 0.0…	0.0193309	0.0351542	0.0064856	0.00324808	0.00324808	0.00971261	0.0064856	0.00324808	0.0129291	0.0445254	0.00324808	0.0193309	0.00971261	0.00324808	0.00971261	0.00324808	0.0129291	0.0064856	0.00324808	0.0064856	0.00324808	0.00324808	0.0129291	0.0193309	0.0193309	0.0225162	0.0599422	0.0751102	0.150127	0.066039	0.0599422	0.0538055	0.0320101	0.37201	0.0476288	0.152887	0.26587	0.177331	0.0351542
Angiogenesis	8	141	980324	324.386	591	0.260526	2.25213e-14	7.023e-12	72.0812	PIK3CA (30.565 %) MAP2K4 ( 3.445 %) AKT1 ( 2.739 %) PTPRB ( 1.148 %) NOTCH2 ( 1.060 %) PRKCQ ( 1.060 %) PIK3R1 ( 0.883 %) BRAF ( 0.795 %) PDGFRA ( 0.795 %) PRKCB ( 0.795 %) APC ( 0.707 %) PIK3CB ( 0.707 %) EPHB2 ( 0.618 %) NOTCH4 ( 0.618 %) PIK3C2B ( 0.618 %) PIK3CG ( 0.618 %) PLCG1 ( 0.618 %) SOS1 ( 0.618 %) EPHB1 ( 0.530 %) JUN ( 0.530 %) PLA2G4A ( 0.530 %) PLD1 ( 0.530 %) PRKCZ ( 0.530 %) PRKD…	0.0621515	0.110983	0.0211618	0.0106375	0.0106375	0.0315742	0.0211618	0.0106375	0.0418758	0.139053	0.0106375	0.0621515	0.0315742	0.0106375	0.0315742	0.0106375	0.0418758	0.0211618	0.0106375	0.0211618	0.0106375	0.0106375	0.0418758	0.0621515	0.0621515	0.0721278	0.183881	0.226374	0.414169	0.201151	0.183881	0.166237	0.101425	0.783315	0.148212	0.420401	0.637951	0.473586	0.110983
IL2 Signaling Events Mediated By PI3K	68	38	227344	97.7541	444	0.657248	2.26765e-14	7.023e-12	90.991	PIK3CA (30.565 %) AKT1 ( 2.739 %) MTOR ( 1.325 %) MYB ( 0.972 %) PIK3R1 ( 0.883 %) SOS1 ( 0.618 %) PRKCZ ( 0.530 %) JAK1 ( 0.442 %) JAK3 ( 0.442 %) E2F1 ( 0.353 %) EIF3A ( 0.353 %) GAB2 ( 0.353 %) NFATC2 ( 0.353 %) NFKB1 ( 0.353 %) RPS6KB1 ( 0.353 %) GRB2 ( 0.177 %) IL2RB ( 0.177 %) IL2RG ( 0.177 %) MYC ( 0.177 %) PTPN11 ( 0.177 %) TERT ( 0.177 %) BCL2L1 ( 0.088 %) CALM2 ( 0.088 %) CALM3 ( 0.088 …	0.0153908	0.0280354	0.00515683	0.00258175	0.00258175	0.00772526	0.00515683	0.00258175	0.0102871	0.0355441	0.00258175	0.0153908	0.00772526	0.00258175	0.00772526	0.00258175	0.0102871	0.00515683	0.00258175	0.00515683	0.00258175	0.00258175	0.0102871	0.0153908	0.0153908	0.0179329	0.0479299	0.0601566	0.121249	0.0528396	0.0479299	0.0429948	0.0255196	0.309036	0.0380341	0.123518	0.217752	0.143675	0.0280354
FGF Signaling Pathway ( FGF Signaling Pathway )	46	44	264279	95.5221	413	0.635846	2.26871e-14	7.023e-12	90.3148	PIK3CA (30.565 %) PIK3R1 ( 0.883 %) BRAF ( 0.795 %) PIK3CB ( 0.707 %) FGFR2 ( 0.618 %) KRAS ( 0.618 %) PLCG1 ( 0.618 %) SOS1 ( 0.618 %) SOS2 ( 0.442 %) ARAF ( 0.353 %) FGF6 ( 0.353 %) GAB1 ( 0.353 %) PIK3CD ( 0.353 %) PLCG2 ( 0.353 %) FGF23 ( 0.265 %) FGFR4 ( 0.265 %) FRS3 ( 0.265 %) NRAS ( 0.265 %) PRKCD ( 0.265 %) FGF13 ( 0.177 %) FGF3 ( 0.177 %) FGF7 ( 0.177 %) FGF9 ( 0.177 %) GRB2 ( 0.177 %) …	0.0150115	0.0273488	0.00502909	0.00251771	0.00251771	0.00753414	0.00502909	0.00251771	0.0100329	0.0346769	0.00251771	0.0150115	0.00753414	0.00251771	0.00753414	0.00251771	0.0100329	0.00502909	0.00251771	0.00502909	0.00251771	0.00251771	0.0100329	0.0150115	0.0150115	0.0174914	0.0467679	0.0587075	0.118424	0.0515618	0.0467679	0.0419498	0.0248938	0.302663	0.0371073	0.120644	0.212966	0.14037	0.0273488
Formation Of Senescence Associated Heterochromatin Foci (SAHF)	210	17	84842	39.1157	392	1.00093	2.2697e-14	7.023e-12	94.1327	TP53 (32.155 %) RB1 ( 2.032 %) EP400 ( 0.442 %) CABIN1 ( 0.353 %) HIST1H1D ( 0.353 %) HIRA ( 0.265 %) HIST1H1B ( 0.265 %) HIST1H1C ( 0.265 %) UBN1 ( 0.265 %) LMNB1 ( 0.177 %) ASF1A ( 0.088 %) HIST1H1E ( 0.088 %) HMGA2 ( 0.088 %)	0.0058668	0.0107295	0.00195944	0.000980198	0.000980198	0.00293771	0.00195944	0.000980198	0.00391503	0.0136357	0.000980198	0.0058668	0.00293771	0.000980198	0.00293771	0.000980198	0.00391503	0.00195944	0.000980198	0.00195944	0.000980198	0.000980198	0.00391503	0.0058668	0.0058668	0.00684124	0.0184604	0.0232615	0.0478512	0.0203836	0.0184604	0.0165333	0.00975886	0.130848	0.0146025	0.0487845	0.0889564	0.0571431	0.0107295
Aurora A Signaling	307	33	204072	85.6578	424	0.694599	2.29042e-14	7.023e-12	90.8019	TP53 (32.155 %) AKT1 ( 2.739 %) BRCA1 ( 1.325 %) CPEB1 ( 0.530 %) KPNB1 ( 0.442 %) CDC25B ( 0.353 %) CKAP5 ( 0.353 %) ARHGEF7 ( 0.265 %) DLGAP5 ( 0.265 %) KPNA1 ( 0.265 %) PPP2R5D ( 0.265 %) RASA1 ( 0.265 %) TACC1 ( 0.265 %) TACC3 ( 0.265 %) GIT1 ( 0.177 %) MDM2 ( 0.177 %) NFKBIA ( 0.177 %) PRKACA ( 0.177 %) AJUBA ( 0.088 %) AURKA ( 0.088 %) AURKAIP1 ( 0.088 %) AURKB ( 0.088 %) GSK3B ( 0.088 %) P…	0.0133514	0.0243413	0.00447043	0.00223772	0.00223772	0.00669814	0.00447043	0.00223772	0.00892087	0.0308764	0.00223772	0.0133514	0.00669814	0.00223772	0.00669814	0.00223772	0.00892087	0.00447043	0.00223772	0.00447043	0.00223772	0.00223772	0.00892087	0.0133514	0.0133514	0.0155593	0.0416711	0.0523456	0.105966	0.0459553	0.0416711	0.0373678	0.0221532	0.274107	0.0330451	0.107966	0.1917	0.125772	0.0243413
P53 Pathway	161	11	117607	59.0796	433	0.86505	2.29931e-14	7.023e-12	92.8406	TP53 (32.16 %) AKT1 ( 2.74 %) ATM ( 2.03 %) ATR ( 1.59 %) CREBBP ( 0.80 %) EP300 ( 0.71 %) KAT2B ( 0.27 %) MDM4 ( 0.27 %) CDK2 ( 0.18 %) MDM2 ( 0.18 %) PPP2CA ( 0.18 %)	0.00900823	0.0164531	0.00301181	0.00150704	0.00150704	0.00451431	0.00301181	0.00150704	0.00601454	0.0208931	0.00150704	0.00900823	0.00451431	0.00150704	0.00451431	0.00150704	0.00601454	0.00301181	0.00150704	0.00301181	0.00150704	0.00150704	0.00601454	0.00900823	0.00900823	0.0105017	0.0282487	0.035549	0.0726357	0.0311754	0.0282487	0.0253131	0.0149686	0.193998	0.0223687	0.0740333	0.133486	0.086517	0.0164531
Insulin/IGF Pathway Protein Kinase B Signaling Cascade	365	22	190830	81.1099	416	0.710019	2.30714e-14	7.023e-12	93.0288	PIK3CA (30.565 %) PTEN ( 3.092 %) INSRR ( 1.060 %) IRS4 ( 0.795 %) IGF2R ( 0.530 %) INPPL1 ( 0.530 %) INSR ( 0.530 %) TSC1 ( 0.442 %) IGF1R ( 0.353 %) TSC2 ( 0.353 %) GSK3A ( 0.265 %) IGF1 ( 0.265 %) IRS1 ( 0.265 %) MDM4 ( 0.265 %) MDM2 ( 0.177 %) FOXO1 ( 0.088 %) FOXO3 ( 0.088 %) GSK3B ( 0.088 %)	0.0125949	0.0229695	0.00421606	0.00211026	0.00211026	0.00631742	0.00421606	0.00211026	0.00841435	0.0291418	0.00211026	0.0125949	0.00631742	0.00211026	0.00631742	0.00211026	0.00841435	0.00421606	0.00211026	0.00421606	0.00211026	0.00211026	0.00841435	0.0125949	0.0125949	0.0146786	0.0393424	0.0494359	0.100237	0.0433926	0.0393424	0.0352751	0.0209033	0.260725	0.0311905	0.102136	0.181831	0.119045	0.0229695
Signaling Events Mediated By Hepatocyte Growth Factor Receptor (c Met)	262	80	551119	199.559	523	0.418431	2.31041e-14	7.023e-12	74.761	PIK3CA (30.565 %) CDH1 ( 6.095 %) MAP2K4 ( 3.445 %) AKT1 ( 2.739 %) MTOR ( 1.325 %) PIK3R1 ( 0.883 %) APC ( 0.707 %) MET ( 0.618 %) PLCG1 ( 0.618 %) SOS1 ( 0.618 %) ARHGEF4 ( 0.530 %) INPPL1 ( 0.530 %) JUN ( 0.530 %) PRKCZ ( 0.530 %) SH3KBP1 ( 0.530 %) CBL ( 0.442 %) HGF ( 0.442 %) KPNB1 ( 0.442 %) RAPGEF1 ( 0.442 %) RPTOR ( 0.442 %) AKT2 ( 0.353 %) CTNNA1 ( 0.353 %) EPS15 ( 0.353 %) GAB1 ( 0.353…	0.0342388	0.061874	0.0115457	0.00578963	0.00578963	0.0172685	0.0115457	0.00578963	0.0229582	0.078074	0.00578963	0.0342388	0.0172685	0.00578963	0.0172685	0.00578963	0.0229582	0.0115457	0.00578963	0.0115457	0.00578963	0.00578963	0.0229582	0.0342388	0.0342388	0.0398302	0.104455	0.130081	0.251978	0.114795	0.104455	0.0939943	0.0564109	0.564091	0.0834116	0.256309	0.42398	0.294174	0.061874
Apoptosis	331	8	43881	16.4882	372	1.35337	2.32671e-14	7.023e-12	98.1183	TP53 (32.155 %) JUN ( 0.530 %) BCL2L11 ( 0.265 %) MYC ( 0.177 %) TNFSF10 ( 0.177 %) DIABLO ( 0.088 %) MCL1 ( 0.088 %)	0.00242738	0.00444569	0.000809781	0.000404972	0.000404972	0.00121443	0.000809781	0.000404972	0.00161891	0.00565471	0.000404972	0.00242738	0.00121443	0.000404972	0.00121443	0.000404972	0.00161891	0.000809781	0.000404972	0.000809781	0.000404972	0.000404972	0.00161891	0.00242738	0.00242738	0.00283137	0.0076665	0.00967421	0.020049	0.00847007	0.0076665	0.00686227	0.00404235	0.0562772	0.0060574	0.0204459	0.0377492	0.0240103	0.00444569
TP53 Regulates Transcription Of Additional Cell Cycle Genes Whose Exact Role In The P53 Pathway Remain Uncertain	132	21	130395	43.7943	391	0.950759	2.35104e-14	7.023e-12	97.6982	TP53 (32.155 %) TNKS1BP1 ( 0.707 %) CNOT1 ( 0.442 %) PLK2 ( 0.442 %) CENPJ ( 0.265 %) CNOT3 ( 0.265 %) PLK3 ( 0.265 %) CDC25C ( 0.177 %) CNOT2 ( 0.177 %) CNOT8 ( 0.177 %) CNOT11 ( 0.088 %) CNOT6 ( 0.088 %) CNOT6L ( 0.088 %)	0.00659389	0.0120556	0.00220281	0.00110201	0.00110201	0.0033024	0.00220281	0.00110201	0.00440077	0.0153182	0.00110201	0.00659389	0.0033024	0.00110201	0.0033024	0.00110201	0.00440077	0.00220281	0.00110201	0.00220281	0.00110201	0.00110201	0.00440077	0.00659389	0.00659389	0.00768864	0.0207319	0.0261158	0.0536389	0.022889	0.0207319	0.01857	0.0109656	0.145873	0.0164033	0.0546818	0.0994495	0.0640163	0.0120556
Signaling By FGFR3 Fusions In Cancer	122	10	69957	29.8539	364	1.0861	2.35116e-14	7.023e-12	95.6044	PIK3CA (30.565 %) PIK3R1 ( 0.883 %) KRAS ( 0.618 %) SOS1 ( 0.618 %) GAB1 ( 0.353 %) NRAS ( 0.265 %) GRB2 ( 0.177 %) HRAS ( 0.088 %)	0.00444364	0.00813159	0.00148341	0.000741982	0.000741982	0.0022243	0.00148341	0.000741982	0.00296463	0.0103378	0.000741982	0.00444364	0.0022243	0.000741982	0.0022243	0.000741982	0.00296463	0.00148341	0.000741982	0.00148341	0.000741982	0.000741982	0.00296463	0.00444364	0.00444364	0.00518233	0.0140039	0.0176565	0.0364326	0.0154666	0.0140039	0.0125391	0.0073951	0.100704	0.0110721	0.0371476	0.0680858	0.0435583	0.00813159
Constitutive Signaling By Ligand Responsive EGFR Cancer Variants	22	19	123434	59.5924	390	0.815874	2.35448e-14	7.023e-12	92.5641	PIK3CA (30.565 %) PIK3R1 ( 0.883 %) EGFR ( 0.795 %) UBC ( 0.795 %) KRAS ( 0.618 %) PLCG1 ( 0.618 %) SOS1 ( 0.618 %) CBL ( 0.442 %) GAB1 ( 0.353 %) CDC37 ( 0.265 %) EGF ( 0.265 %) NRAS ( 0.265 %) GRB2 ( 0.177 %) HRAS ( 0.088 %) HSP90AA1 ( 0.088 %) SHC1 ( 0.088 %) UBA52 ( 0.088 %)	0.00909028	0.0166024	0.00303932	0.00152082	0.00152082	0.00455551	0.00303932	0.00152082	0.0060694	0.0210822	0.00152082	0.00909028	0.00455551	0.00152082	0.00455551	0.00152082	0.0060694	0.00303932	0.00152082	0.00303932	0.00152082	0.00152082	0.0060694	0.00909028	0.00909028	0.0105973	0.0285034	0.0358683	0.0732753	0.0314561	0.0285034	0.0255417	0.0151045	0.195587	0.022571	0.0746847	0.134621	0.087273	0.0166024
TP53 Network	182	6	27431	14.3467	368	1.40909	2.37582e-14	7.023e-12	98.3696	TP53 (32.155 %) TP63 ( 0.265 %) MYC ( 0.177 %) TNFSF10 ( 0.177 %) TP73 ( 0.177 %) SUMO1 ( 0.088 %)	0.0021084	0.00386201	0.000703295	0.000351709	0.000351709	0.00105476	0.000703295	0.000351709	0.0014061	0.00491269	0.000351709	0.0021084	0.00105476	0.000351709	0.00105476	0.000351709	0.0014061	0.000703295	0.000351709	0.000703295	0.000351709	0.000351709	0.0014061	0.0021084	0.0021084	0.00245937	0.00666137	0.00840697	0.0174348	0.00735998	0.00666137	0.00596227	0.00351153	0.049059	0.00526267	0.0177804	0.0328661	0.0208851	0.00386201
AKT(PKB) Activation Signaling ( IGF1 Signaling Pathway )// AKT(PKB) Activation Signaling ( Insulin Receptor Signaling (D. Melanogaster) )// AKT(PKB) Activation Signaling ( PDGF Signaling Pathway )	4	7	70244	30.5753	388	1.10346	2.40574e-14	7.023e-12	97.6804	PIK3CA (30.57 %) AKT1 ( 2.74 %) PIK3CB ( 0.71 %) AKT2 ( 0.35 %) AKT3 ( 0.35 %) PIK3CD ( 0.35 %)	0.00455371	0.00833263	0.00152021	0.000760396	0.000760396	0.00227946	0.00152021	0.000760396	0.00303812	0.0105931	0.000760396	0.00455371	0.00227946	0.000760396	0.00227946	0.000760396	0.00303812	0.00152021	0.000760396	0.00152021	0.000760396	0.000760396	0.00303812	0.00455371	0.00455371	0.00531065	0.0143491	0.0180908	0.0373201	0.0158475	0.0143491	0.0128484	0.007578	0.103071	0.0113454	0.0380521	0.0697158	0.0446153	0.00833263
Validated Targets Of C MYC Transcriptional Activation	138	80	453731	166.222	455	0.437323	2.40751e-14	7.023e-12	84.1758	TP53 (32.155 %) HUWE1 ( 1.943 %) CAD ( 0.795 %) CREBBP ( 0.795 %) TRRAP ( 0.795 %) EP300 ( 0.707 %) HSPD1 ( 0.707 %) SMAD4 ( 0.618 %) IREB2 ( 0.442 %) NCL ( 0.442 %) BCAT1 ( 0.353 %) DKC1 ( 0.353 %) EIF4A1 ( 0.353 %) HSPA4 ( 0.353 %) KIR3DL1 ( 0.353 %) EIF4G1 ( 0.265 %) GPAM ( 0.265 %) MYCT1 ( 0.265 %) PFKM ( 0.265 %) SERPINI1 ( 0.265 %) UBTF ( 0.265 %) BAX ( 0.177 %) BMI1 ( 0.177 %) CCNB1 ( 0.17…	0.0277194	0.050231	0.0093265	0.00467417	0.00467417	0.0139571	0.0093265	0.00467417	0.018566	0.063487	0.00467417	0.0277194	0.0139571	0.00467417	0.0139571	0.00467417	0.018566	0.0093265	0.00467417	0.0093265	0.00467417	0.00467417	0.018566	0.0277194	0.0277194	0.032264	0.0851705	0.106352	0.208841	0.0937026	0.0851705	0.076558	0.0457707	0.488278	0.0678644	0.212539	0.359232	0.245053	0.050231
PDGF Signaling Pathway	95	113	812792	291.33	547	0.273601	2.4226e-14	7.023e-12	78.4278	PIK3CA (30.565 %) ITPR1 ( 1.325 %) ARHGAP5 ( 0.883 %) ITPR3 ( 0.883 %) PIK3R1 ( 0.883 %) BRAF ( 0.795 %) ITPR2 ( 0.795 %) PDGFRA ( 0.795 %) SRGAP1 ( 0.795 %) PIK3CB ( 0.707 %) JAK2 ( 0.618 %) PIK3CG ( 0.618 %) PLCG1 ( 0.618 %) SOS1 ( 0.618 %) STAT4 ( 0.618 %) ARHGAP9 ( 0.530 %) JUN ( 0.530 %) PKN2 ( 0.530 %) STAT3 ( 0.530 %) STAT5B ( 0.530 %) VAV3 ( 0.530 %) ARHGAP12 ( 0.442 %) JAK1 ( 0.442 %) JA…	0.054172	0.0970668	0.0183936	0.00923947	0.00923947	0.0274631	0.0183936	0.00923947	0.0364488	0.121864	0.00923947	0.054172	0.0274631	0.00923947	0.0274631	0.00923947	0.0364488	0.0183936	0.00923947	0.0183936	0.00923947	0.00923947	0.0364488	0.054172	0.054172	0.0629109	0.161689	0.199708	0.371313	0.177108	0.161689	0.14598	0.0886463	0.734831	0.129978	0.377121	0.585976	0.427043	0.0970668
TP53 Regulates Transcription Of Genes Involved In G1 Cell Cycle Arrest	133	13	49409	19.6019	385	1.29316	2.43809e-14	7.023e-12	98.1818	TP53 (32.155 %) CDKN1B ( 0.883 %) CCNA2 ( 0.442 %) E2F1 ( 0.353 %) CCNE1 ( 0.177 %) CCNE2 ( 0.177 %) CDK2 ( 0.177 %) ARID3A ( 0.088 %) PCBP4 ( 0.088 %) ZNF385A ( 0.088 %)	0.00289318	0.00529777	0.000965324	0.000482779	0.000482779	0.00144764	0.000965324	0.000482779	0.00192972	0.00673773	0.000482779	0.00289318	0.00144764	0.000482779	0.00144764	0.000482779	0.00192972	0.000965324	0.000482779	0.000965324	0.000482779	0.000482779	0.00192972	0.00289318	0.00289318	0.00337456	0.00913305	0.0115226	0.0238556	0.0100896	0.00913305	0.00817562	0.00481731	0.0667237	0.00721726	0.0243269	0.0448387	0.028558	0.00529777
IGF1 Signaling Pathway ( IGF1 Signaling Pathway )	67	27	170670	75.3362	393	0.717389	2.45157e-14	7.023e-12	92.112	PIK3CA (30.565 %) PIK3R1 ( 0.883 %) BRAF ( 0.795 %) PIK3CB ( 0.707 %) KRAS ( 0.618 %) SOS1 ( 0.618 %) SOS2 ( 0.442 %) ARAF ( 0.353 %) IGF1R ( 0.353 %) PIK3CD ( 0.353 %) IGF1 ( 0.265 %) IRS1 ( 0.265 %) NRAS ( 0.265 %) SHC3 ( 0.265 %) GRB2 ( 0.177 %) IGFBP4 ( 0.177 %) KLK3 ( 0.177 %) HRAS ( 0.088 %) IGFBP2 ( 0.088 %) RAF1 ( 0.088 %) SHC1 ( 0.088 %) SHC2 ( 0.088 %)	0.0116425	0.021241	0.003896	0.0019499	0.0019499	0.0058383	0.003896	0.0019499	0.00777682	0.0269553	0.0019499	0.0116425	0.0058383	0.0019499	0.0058383	0.0019499	0.00777682	0.003896	0.0019499	0.003896	0.0019499	0.0019499	0.00777682	0.0116425	0.0116425	0.0135697	0.0364051	0.0457631	0.0929795	0.0401592	0.0364051	0.0326362	0.0193288	0.243542	0.0288526	0.0947481	0.169246	0.110511	0.021241
VEGF Signaling Pathway	140	54	365703	146.748	480	0.514668	2.45543e-14	7.023e-12	88.3333	PIK3CA (30.565 %) AKT1 ( 2.739 %) PRKCQ ( 1.060 %) PIK3R1 ( 0.883 %) BRAF ( 0.795 %) PRKCB ( 0.795 %) PIK3CB ( 0.707 %) PIK3C2B ( 0.618 %) PIK3CG ( 0.618 %) PLCG1 ( 0.618 %) PLA2G4A ( 0.530 %) PRKCZ ( 0.530 %) PRKD3 ( 0.530 %) ARAF ( 0.353 %) KDR ( 0.353 %) NOS3 ( 0.353 %) PIK3CD ( 0.353 %) PLCG2 ( 0.353 %) PRKD1 ( 0.353 %) PRKD2 ( 0.353 %) PTK2 ( 0.353 %) ETS1 ( 0.265 %) HIF1A ( 0.265 %) NRAS ( …	0.0240723	0.0436892	0.00808935	0.00405289	0.00405289	0.0121095	0.00808935	0.00405289	0.0161133	0.0552697	0.00405289	0.0240723	0.0121095	0.00405289	0.0121095	0.00405289	0.0161133	0.00808935	0.00405289	0.00808935	0.00405289	0.00405289	0.0161133	0.0240723	0.0240723	0.0280276	0.0742595	0.0928677	0.183768	0.0817482	0.0742595	0.0667098	0.0397977	0.440516	0.0590985	0.187076	0.320098	0.216252	0.0436892
Neurotrophic Factor Mediated Trk Receptor Signaling	256	63	455108	188.57	457	0.384444	2.45805e-14	7.023e-12	87.0897	PIK3CA (30.565 %) PIK3R1 ( 0.883 %) KRAS ( 0.618 %) NTRK2 ( 0.618 %) PLCG1 ( 0.618 %) SOS1 ( 0.618 %) ABL1 ( 0.530 %) DNM1 ( 0.530 %) KIDINS220 ( 0.530 %) NEDD4L ( 0.530 %) NTRK3 ( 0.530 %) PRKCZ ( 0.530 %) STAT3 ( 0.530 %) MAGED1 ( 0.442 %) MCF2L ( 0.442 %) NTRK1 ( 0.442 %) RAPGEF1 ( 0.442 %) RASGRF1 ( 0.442 %) TIAM1 ( 0.442 %) BDNF ( 0.353 %) GAB1 ( 0.353 %) GAB2 ( 0.353 %) SQSTM1 ( 0.353 %) AR…	0.0320503	0.0579727	0.0107996	0.00541447	0.00541447	0.0161556	0.0107996	0.00541447	0.0214826	0.0731918	0.00541447	0.0320503	0.0161556	0.00541447	0.0161556	0.00541447	0.0214826	0.0107996	0.00541447	0.0107996	0.00541447	0.00541447	0.0214826	0.0320503	0.0320503	0.0372912	0.0980124	0.122168	0.237734	0.107754	0.0980124	0.0881649	0.0528444	0.539929	0.07821	0.241861	0.402961	0.278015	0.0579727
P53 Pathway By Glucose Deprivation	162	21	146524	67.5163	416	0.789685	2.4598e-14	7.023e-12	93.75	TP53 (32.155 %) AKT1 ( 2.739 %) TSC1 ( 0.442 %) AKT2 ( 0.353 %) AKT3 ( 0.353 %) PRKAA2 ( 0.353 %) RPS6KB1 ( 0.353 %) RPS6KB2 ( 0.353 %) TSC2 ( 0.353 %) PPP2CB ( 0.265 %) RHEB ( 0.265 %) STK11 ( 0.265 %) TP63 ( 0.265 %) PPP2CA ( 0.177 %) TP73 ( 0.177 %) IGBP1 ( 0.088 %) PRKAA1 ( 0.088 %) PRKAB1 ( 0.088 %)	0.0103667	0.0189235	0.00346757	0.00173529	0.00173529	0.00519685	0.00346757	0.00173529	0.00692312	0.024022	0.00173529	0.0103667	0.00519685	0.00173529	0.00519685	0.00173529	0.00692312	0.00346757	0.00173529	0.00346757	0.00173529	0.00173529	0.00692312	0.0103667	0.0103667	0.012084	0.0324607	0.0408264	0.0831762	0.0358157	0.0324607	0.029094	0.017218	0.219923	0.0257156	0.0847672	0.152103	0.0989621	0.0189235
MiRNAs Involved In DNA Damage Response	322	8	60271	31.0531	392	1.10118	2.4674e-14	7.023e-12	97.1939	TP53 (32.155 %) ATM ( 2.032 %) CDKN1B ( 0.883 %) CREB1 ( 0.177 %) MYC ( 0.177 %) CDC25A ( 0.088 %) CDK6 ( 0.088 %) H2AFX ( 0.088 %)	0.0046267	0.00846594	0.00154462	0.000772608	0.000772608	0.00231603	0.00154462	0.000772608	0.00308685	0.0107624	0.000772608	0.0046267	0.00231603	0.000772608	0.00231603	0.000772608	0.00308685	0.00154462	0.000772608	0.00154462	0.000772608	0.000772608	0.00308685	0.0046267	0.0046267	0.00539574	0.0145779	0.0183788	0.0379081	0.0161	0.0145779	0.0130535	0.00769928	0.104637	0.0115267	0.0386515	0.0707952	0.0453155	0.00846594
AKT(PKB) Activation Signaling ( Insulin Receptor Signaling (Mammal) )	5	13	128009	56.7638	411	0.859771	2.49031e-14	7.023e-12	95.1338	PIK3CA (30.57 %) AKT1 ( 2.74 %) MTOR ( 1.33 %) PIK3CB ( 0.71 %) RICTOR ( 0.71 %) TSC1 ( 0.44 %) AKT2 ( 0.35 %) AKT3 ( 0.35 %) PIK3CD ( 0.35 %) TSC2 ( 0.35 %) MAPKAP1 ( 0.18 %)	0.00863858	0.0157804	0.00288786	0.00144497	0.00144497	0.00432866	0.00288786	0.00144497	0.00576738	0.0200407	0.00144497	0.00863858	0.00432866	0.00144497	0.00432866	0.00144497	0.00576738	0.00288786	0.00144497	0.00288786	0.00144497	0.00144497	0.00576738	0.00863858	0.00863858	0.0100711	0.0271004	0.0341091	0.0697491	0.02991	0.0271004	0.0242826	0.0143561	0.186802	0.0214567	0.0710933	0.128354	0.0831039	0.0157804
P53 Pathway Feedback Loops 1	163	6	47373	22.3667	370	1.2186	2.49049e-14	7.023e-12	98.9189	TP53 (32.16 %) MDM4 ( 0.27 %) TP63 ( 0.27 %) MDM2 ( 0.18 %) TP73 ( 0.18 %)	0.00330876	0.0060577	0.00110414	0.000552222	0.000552222	0.00165575	0.00110414	0.000552222	0.00220706	0.00770342	0.000552222	0.00330876	0.00165575	0.000552222	0.00165575	0.000552222	0.00220706	0.00110414	0.000552222	0.00110414	0.000552222	0.000552222	0.00220706	0.00330876	0.00330876	0.00385916	0.0104402	0.0131695	0.0272408	0.0115329	0.0104402	0.00934642	0.00550852	0.0759505	0.00825139	0.027778	0.0511225	0.0325993	0.0060577
Integrated Cancer Pathway	319	36	278494	108.302	498	0.662593	2.49333e-14	7.023e-12	83.9357	TP53 (32.155 %) PTEN ( 3.092 %) AKT1 ( 2.739 %) ATM ( 2.032 %) RB1 ( 2.032 %) ATR ( 1.590 %) BRCA1 ( 1.325 %) CASP8 ( 1.325 %) CDKN1B ( 0.883 %) MSH6 ( 0.530 %) BLM ( 0.442 %) JAK1 ( 0.442 %) MSH2 ( 0.442 %) RAD50 ( 0.442 %) SMAD2 ( 0.442 %) E2F1 ( 0.353 %) POU2F1 ( 0.353 %) CHEK2 ( 0.265 %) BAX ( 0.177 %) CDK2 ( 0.177 %) MDM2 ( 0.177 %) MMP1 ( 0.177 %) NOXA1 ( 0.177 %) SMAD3 ( 0.177 %) CDK4 ( 0.…	0.0172021	0.0313109	0.00576723	0.00288778	0.00288778	0.00863835	0.00576723	0.00288778	0.0115012	0.0396788	0.00288778	0.0172021	0.00863835	0.00288778	0.00863835	0.00288778	0.0115012	0.00576723	0.00288778	0.00576723	0.00288778	0.00288778	0.0115012	0.0172021	0.0172021	0.0200402	0.0534649	0.0670531	0.13463	0.0589238	0.0534649	0.0479744	0.0285054	0.338702	0.042452	0.137129	0.240227	0.159298	0.0313109
PI3K Events In ERBB2 Signaling	100	16	123605	54.6421	395	0.85907	2.49401e-14	7.023e-12	92.6582	PIK3CA (30.565 %) ERBB2 ( 1.502 %) ERBB3 ( 1.325 %) ERBB4 ( 1.060 %) PIK3R1 ( 0.883 %) EGFR ( 0.795 %) GAB1 ( 0.353 %) EGF ( 0.265 %) NRG1 ( 0.265 %) GRB2 ( 0.177 %) NRG3 ( 0.177 %) BTC ( 0.088 %) HBEGF ( 0.088 %)	0.00830114	0.0151661	0.00277474	0.00138833	0.00138833	0.00415922	0.00277474	0.00138833	0.00554178	0.0192622	0.00138833	0.00830114	0.00415922	0.00138833	0.00415922	0.00138833	0.00554178	0.00277474	0.00138833	0.00277474	0.00138833	0.00138833	0.00554178	0.00830114	0.00830114	0.00967795	0.0260513	0.0327934	0.0671071	0.0287538	0.0260513	0.0233414	0.0137969	0.180179	0.0206238	0.0684023	0.123644	0.0799782	0.0151661
E Cadherin Signaling In The Nascent Adherens Junction	246	37	301335	117.704	457	0.589126	2.50014e-14	7.023e-12	84.6827	PIK3CA (30.565 %) CDH1 ( 6.095 %) AKT1 ( 2.739 %) PIK3R1 ( 0.883 %) CYFIP2 ( 0.618 %) DLG1 ( 0.618 %) NCKAP1 ( 0.618 %) TJP1 ( 0.618 %) IQGAP1 ( 0.442 %) ITGAE ( 0.442 %) RAPGEF1 ( 0.442 %) TIAM1 ( 0.442 %) CTNNA1 ( 0.353 %) ENAH ( 0.353 %) PIP5K1C ( 0.353 %) CTTN ( 0.265 %) ABI1 ( 0.177 %) CTNNB1 ( 0.177 %) KLHL20 ( 0.177 %) RAP1B ( 0.177 %) VAV2 ( 0.177 %) CA2 ( 0.088 %) CCND1 ( 0.088 %) CRK ( …	0.0188428	0.0342736	0.0063208	0.00316541	0.00316541	0.0094662	0.0063208	0.00316541	0.0126016	0.0434154	0.00316541	0.0188428	0.0094662	0.00316541	0.0094662	0.00316541	0.0126016	0.0063208	0.00316541	0.0063208	0.00316541	0.00316541	0.0126016	0.0188428	0.0188428	0.0219486	0.0584597	0.0732675	0.146595	0.064411	0.0584597	0.0524706	0.031207	0.364518	0.0464434	0.149297	0.260063	0.173228	0.0342736
Senescence And Autophagy In Cancer	172	7	37969	18.3857	381	1.31645	2.5105e-14	7.023e-12	98.1627	TP53 (32.155 %) MTOR ( 1.325 %) JUN ( 0.530 %) IFNB1 ( 0.088 %) ING1 ( 0.088 %) IRF1 ( 0.088 %)	0.00271095	0.00496446	0.000904468	0.000452336	0.000452336	0.0013564	0.000904468	0.000452336	0.00180812	0.00631412	0.000452336	0.00271095	0.0013564	0.000452336	0.0013564	0.000452336	0.00180812	0.000904468	0.000452336	0.000904468	0.000452336	0.000452336	0.00180812	0.00271095	0.00271095	0.00316206	0.00855949	0.0107998	0.022368	0.00945622	0.00855949	0.00766195	0.00451417	0.0626502	0.0067636	0.0228102	0.042071	0.0267812	0.00496446
Stabilization Of P53	174	9	68271	32.6793	393	1.08012	2.51226e-14	7.023e-12	96.9466	TP53 (32.155 %) ATM ( 2.032 %) UBC ( 0.795 %) CHEK2 ( 0.265 %) MDM4 ( 0.265 %) MDM2 ( 0.177 %) UBA52 ( 0.088 %)	0.00487551	0.00892026	0.00162782	0.00081424	0.00081424	0.00244073	0.00162782	0.00081424	0.00325298	0.0113392	0.00081424	0.00487551	0.00244073	0.00081424	0.00244073	0.00081424	0.00325298	0.00162782	0.00081424	0.00162782	0.00081424	0.00081424	0.00325298	0.00487551	0.00487551	0.00568578	0.0153577	0.0193599	0.0399103	0.0169605	0.0153577	0.0137523	0.00811263	0.109955	0.0121442	0.0406921	0.0744659	0.0476992	0.00892026
PI3K/AKT Activation	102	9	58628	23.837	365	1.18504	2.51782e-14	7.023e-12	97.2603	PIK3CA (30.565 %) PIK3R1 ( 0.883 %) PIK3CB ( 0.707 %) NTRK1 ( 0.442 %) IRS1 ( 0.265 %) NGF ( 0.177 %) RHOA ( 0.088 %)	0.00353052	0.0064631	0.00117823	0.000589288	0.000589288	0.00176682	0.00117823	0.000589288	0.00235507	0.0082185	0.000589288	0.00353052	0.00176682	0.000589288	0.00176682	0.000589288	0.00235507	0.00117823	0.000589288	0.00117823	0.000589288	0.000589288	0.00235507	0.00353052	0.00353052	0.00411773	0.0111373	0.0140475	0.029043	0.0123024	0.0111373	0.0099708	0.00587728	0.0808381	0.00880295	0.0296152	0.0544598	0.0347496	0.0064631
EPHA2 Forward Signaling	248	19	132176	58.2627	382	0.816673	2.52042e-14	7.023e-12	94.5026	PIK3CA (30.565 %) PIK3R1 ( 0.883 %) ARHGAP35 ( 0.795 %) INPPL1 ( 0.530 %) VAV3 ( 0.530 %) CBL ( 0.442 %) TIAM1 ( 0.442 %) EPHA2 ( 0.353 %) PTK2 ( 0.353 %) BCAR1 ( 0.265 %) GRB2 ( 0.177 %) VAV2 ( 0.177 %) PAK1 ( 0.088 %) RHOA ( 0.088 %) SHC1 ( 0.088 %)	0.00887769	0.0162155	0.00296803	0.00148512	0.00148512	0.00444874	0.00296803	0.00148512	0.00592725	0.0205921	0.00148512	0.00887769	0.00444874	0.00148512	0.00444874	0.00148512	0.00592725	0.00296803	0.00148512	0.00296803	0.00148512	0.00148512	0.00592725	0.00887769	0.00887769	0.0103496	0.0278432	0.0350407	0.0716171	0.0307286	0.0278432	0.0249493	0.0147523	0.191464	0.0220467	0.0729959	0.131677	0.0853129	0.0162155
FAS (CD95) Signaling Pathway	337	36	252606	88.4459	425	0.681711	2.54044e-14	7.023e-12	90.5882	PIK3CA (30.565 %) AKT1 ( 2.739 %) CASP8 ( 1.325 %) PTPN13 ( 0.972 %) PIK3R1 ( 0.883 %) PIK3CB ( 0.707 %) BTK ( 0.530 %) RIPK1 ( 0.442 %) IKBKB ( 0.353 %) RFC1 ( 0.353 %) CLTC ( 0.265 %) EZR ( 0.265 %) SYK ( 0.265 %) BID ( 0.177 %) CHUK ( 0.177 %) FASLG ( 0.177 %) MAP2K7 ( 0.177 %) MAPK10 ( 0.177 %) MAPK14 ( 0.177 %) MAPK8 ( 0.177 %) BIRC2 ( 0.088 %) BIRC3 ( 0.088 %) CASP10 ( 0.088 %) FADD ( 0.088…	0.013818	0.025187	0.00462737	0.00231637	0.00231637	0.00693302	0.00462737	0.00231637	0.00923332	0.0319454	0.00231637	0.013818	0.00693302	0.00231637	0.00693302	0.00231637	0.00923332	0.00462737	0.00231637	0.00462737	0.00231637	0.00231637	0.00923332	0.013818	0.013818	0.0161023	0.0431054	0.0541368	0.109483	0.0475333	0.0431054	0.0386569	0.0229237	0.282243	0.0341877	0.111545	0.19773	0.129897	0.025187
Constitutive Signaling By EGFRvIII	21	15	110479	55.6706	386	0.840961	2.54047e-14	7.023e-12	94.0415	PIK3CA (30.565 %) PIK3R1 ( 0.883 %) EGFR ( 0.795 %) KRAS ( 0.618 %) PLCG1 ( 0.618 %) SOS1 ( 0.618 %) CBL ( 0.442 %) GAB1 ( 0.353 %) CDC37 ( 0.265 %) EGF ( 0.265 %) NRAS ( 0.265 %) GRB2 ( 0.177 %) HRAS ( 0.088 %) HSP90AA1 ( 0.088 %) SHC1 ( 0.088 %)	0.00846458	0.0154636	0.00282952	0.00141576	0.00141576	0.00424128	0.00282952	0.00141576	0.00565104	0.0196393	0.00141576	0.00846458	0.00424128	0.00141576	0.00424128	0.00141576	0.00565104	0.00282952	0.00141576	0.00282952	0.00141576	0.00141576	0.00565104	0.00846458	0.00846458	0.00986836	0.0265595	0.0334308	0.0683875	0.0293139	0.0265595	0.0237973	0.0140678	0.183393	0.0210273	0.0697065	0.125928	0.0814933	0.0154636
Signaling By FGFR4 In Disease	124	11	79600	37.0789	373	1.00258	2.54301e-14	7.023e-12	95.4424	PIK3CA (30.565 %) PIK3R1 ( 0.883 %) KRAS ( 0.618 %) PLCG1 ( 0.618 %) SOS1 ( 0.618 %) GAB1 ( 0.353 %) FGFR4 ( 0.265 %) NRAS ( 0.265 %) GRB2 ( 0.177 %) HRAS ( 0.088 %)	0.00555198	0.0101551	0.0018541	0.000927478	0.000927478	0.00277986	0.0018541	0.000927478	0.00370476	0.0129067	0.000927478	0.00555198	0.00277986	0.000927478	0.00277986	0.000927478	0.00370476	0.0018541	0.000927478	0.0018541	0.000927478	0.000927478	0.00370476	0.00555198	0.00555198	0.00647431	0.0174758	0.0220237	0.0453356	0.0192975	0.0174758	0.0156507	0.00923617	0.124264	0.0138222	0.0462211	0.0843777	0.0541531	0.0101551
Prolactin	106	105	697471	247.511	551	0.347557	2.54922e-14	7.023e-12	76.951	PIK3CA (30.565 %) AKT1 ( 2.739 %) RB1 ( 2.032 %) ERBB2 ( 1.502 %) MTOR ( 1.325 %) ERBB4 ( 1.060 %) MYB ( 0.972 %) PIK3R1 ( 0.883 %) BRAF ( 0.795 %) CREBBP ( 0.795 %) EGFR ( 0.795 %) PRKCB ( 0.795 %) EP300 ( 0.707 %) PIK3CB ( 0.707 %) JAK2 ( 0.618 %) MAPK4 ( 0.618 %) PIK3CG ( 0.618 %) SOS1 ( 0.618 %) FLNA ( 0.530 %) JUN ( 0.530 %) STAT3 ( 0.530 %) STAT5B ( 0.530 %) CBL ( 0.442 %) JAK1 ( 0.442 %) L…	0.04427	0.0796608	0.0149799	0.00751823	0.00751823	0.0223855	0.0149799	0.00751823	0.0297355	0.100263	0.00751823	0.04427	0.0223855	0.00751823	0.0223855	0.00751823	0.0297355	0.0149799	0.00751823	0.0149799	0.00751823	0.00751823	0.0297355	0.04427	0.04427	0.0514554	0.133581	0.165664	0.314311	0.146559	0.133581	0.120404	0.0726891	0.660122	0.107028	0.319467	0.511751	0.364154	0.0796608
Insulin Pathway	360	47	311648	131.406	449	0.53363	2.55623e-14	7.023e-12	89.755	PIK3CA (30.565 %) AKT1 ( 2.739 %) PIK3R1 ( 0.883 %) SORBS1 ( 0.618 %) SOS1 ( 0.618 %) INSR ( 0.530 %) PRKCZ ( 0.530 %) CBL ( 0.442 %) EXOC7 ( 0.442 %) GRB14 ( 0.442 %) RAPGEF1 ( 0.442 %) AKT2 ( 0.353 %) EXOC2 ( 0.353 %) EXOC6 ( 0.353 %) GRB10 ( 0.353 %) INPP5D ( 0.353 %) PTPRA ( 0.353 %) RPS6KB1 ( 0.353 %) SGK1 ( 0.353 %) TRIP10 ( 0.353 %) EXOC1 ( 0.265 %) EXOC3 ( 0.265 %) IRS1 ( 0.265 %) RASA1 (…	0.0212793	0.0386657	0.007144	0.0035784	0.0035784	0.0106968	0.007144	0.0035784	0.014237	0.0489489	0.0035784	0.0212793	0.0106968	0.0035784	0.0106968	0.0035784	0.014237	0.007144	0.0035784	0.007144	0.0035784	0.0035784	0.014237	0.0212793	0.0212793	0.0247815	0.0658438	0.0824385	0.164096	0.0725174	0.0658438	0.0591221	0.0352133	0.401081	0.0523521	0.167087	0.288627	0.193531	0.0386657
TNFalpha	344	274	1805329	488.45	680	0.143688	2.58289e-14	7.023e-12	57.9412	TP53 (32.155 %) MAP2K4 ( 3.445 %) AKT1 ( 2.739 %) RB1 ( 2.032 %) ERBB2 ( 1.502 %) CASP8 ( 1.325 %) ERBB3 ( 1.325 %) MTOR ( 1.325 %) MADD ( 1.148 %) PRKCQ ( 1.060 %) PEG3 ( 0.972 %) FBXW7 ( 0.883 %) MYLK ( 0.883 %) PIK3R1 ( 0.883 %) SMARCA4 ( 0.883 %) TRAPPC9 ( 0.883 %) CREBBP ( 0.795 %) EGFR ( 0.795 %) RASAL2 ( 0.795 %) EP300 ( 0.707 %) IKBKAP ( 0.707 %) NLRP4 ( 0.707 %) KTN1 ( 0.618 %) POLR1A ( …	0.109708	0.191879	0.0379947	0.0191813	0.0191813	0.0564472	0.0379947	0.0191813	0.0745457	0.237496	0.0191813	0.109708	0.0564472	0.0191813	0.0564472	0.0191813	0.0745457	0.0379947	0.0191813	0.0379947	0.0191813	0.0191813	0.0745457	0.109708	0.109708	0.126785	0.307873	0.371754	0.620303	0.33417	0.307873	0.280537	0.176076	0.937311	0.252121	0.627586	0.841171	0.687159	0.191879
G2/M DNA Damage Checkpoint// Processing Of DNA Double Strand Break Ends	154	100	464250	158.617	492	0.491616	2.58517e-14	7.023e-12	79.2683	TP53 (32.155 %) ATM ( 2.032 %) ATR ( 1.590 %) BRCA1 ( 1.325 %) HERC2 ( 1.325 %) BRIP1 ( 0.883 %) MDC1 ( 0.883 %) UBC ( 0.795 %) TOPBP1 ( 0.618 %) HIST1H2BC ( 0.530 %) TP53BP1 ( 0.530 %) BLM ( 0.442 %) CCNA2 ( 0.442 %) PPP4R2 ( 0.442 %) RAD50 ( 0.442 %) BRE ( 0.353 %) DNA2 ( 0.353 %) HIST1H2BD ( 0.353 %) HIST2H2BE ( 0.353 %) RFC4 ( 0.353 %) TIMELESS ( 0.353 %) BARD1 ( 0.265 %) BRCC3 ( 0.265 %) CHE…	0.0262812	0.0476538	0.00883828	0.00442895	0.00442895	0.0132281	0.00883828	0.00442895	0.0175985	0.0602515	0.00442895	0.0262812	0.0132281	0.00442895	0.0132281	0.00442895	0.0175985	0.00883828	0.00442895	0.00883828	0.00442895	0.00442895	0.0175985	0.0262812	0.0262812	0.0305937	0.0808785	0.101053	0.199036	0.0890019	0.0808785	0.0726826	0.0434171	0.46993	0.0644136	0.202583	0.344059	0.233812	0.0476538
Regulation Of TP53 Degradation	171	35	270053	105.719	449	0.628095	2.58931e-14	7.023e-12	89.9777	TP53 (32.155 %) AKT1 ( 2.739 %) ATM ( 2.032 %) MTOR ( 1.325 %) UBC ( 0.795 %) RICTOR ( 0.707 %) CCNA2 ( 0.442 %) AKT2 ( 0.353 %) AKT3 ( 0.353 %) SGK1 ( 0.353 %) USP7 ( 0.353 %) CHEK2 ( 0.265 %) MDM4 ( 0.265 %) PPP2CB ( 0.265 %) CDK2 ( 0.177 %) DAXX ( 0.177 %) MAPKAP1 ( 0.177 %) MDM2 ( 0.177 %) PPP2CA ( 0.177 %) PPP2R1A ( 0.177 %) USP2 ( 0.177 %) PPP2R5C ( 0.088 %) RFFL ( 0.088 %) UBA52 ( 0.088 %)	0.0167556	0.0305039	0.00561669	0.0028123	0.0028123	0.00841319	0.00561669	0.0028123	0.0112018	0.0386605	0.0028123	0.0167556	0.00841319	0.0028123	0.00841319	0.0028123	0.0112018	0.00561669	0.0028123	0.00561669	0.0028123	0.0028123	0.0112018	0.0167556	0.0167556	0.0195208	0.0521025	0.0653566	0.131348	0.0574266	0.0521025	0.0467484	0.0277697	0.331504	0.0413641	0.133791	0.234744	0.155471	0.0305039
PI3K Events In ERBB4 Signaling	101	10	70703	28.624	364	1.10437	2.60257e-14	7.023e-12	96.978	PIK3CA (30.565 %) ERBB4 ( 1.060 %) PIK3R1 ( 0.883 %) NRG1 ( 0.265 %) NRG3 ( 0.177 %) BTC ( 0.088 %) HBEGF ( 0.088 %)	0.00425626	0.0077893	0.00142077	0.000710638	0.000710638	0.0021304	0.00142077	0.000710638	0.00283952	0.00990311	0.000710638	0.00425626	0.0021304	0.000710638	0.0021304	0.000710638	0.00283952	0.00142077	0.000710638	0.00142077	0.000710638	0.000710638	0.00283952	0.00425626	0.00425626	0.00496387	0.0134161	0.0169167	0.0349202	0.0148178	0.0134161	0.0120124	0.0070837	0.096661	0.0106067	0.0356061	0.0653046	0.0417566	0.0077893
Ephrin B Reverse Signaling	250	26	173242	80.6188	421	0.717846	2.62984e-14	7.023e-12	89.3112	PIK3CA (30.565 %) MAP2K4 ( 3.445 %) PTPN13 ( 0.972 %) PIK3R1 ( 0.883 %) RGS3 ( 0.707 %) EPHB2 ( 0.618 %) DNM1 ( 0.530 %) EPHB1 ( 0.530 %) ITGB3 ( 0.530 %) LYN ( 0.442 %) TIAM1 ( 0.442 %) ITGA2B ( 0.265 %) YES1 ( 0.265 %) BLK ( 0.177 %) EFNB2 ( 0.177 %) EPHB4 ( 0.177 %) FGR ( 0.177 %) MAPK8 ( 0.177 %) EFNB1 ( 0.088 %) FYN ( 0.088 %) HCK ( 0.088 %) LCK ( 0.088 %) MAP3K7 ( 0.088 %) NCK2 ( 0.088 %)	0.0125136	0.0228218	0.00418871	0.00209655	0.00209655	0.00627648	0.00418871	0.00209655	0.00835987	0.0289551	0.00209655	0.0125136	0.00627648	0.00209655	0.00627648	0.00209655	0.00835987	0.00418871	0.00209655	0.00418871	0.00209655	0.00209655	0.00835987	0.0125136	0.0125136	0.0145839	0.0390917	0.0491225	0.0996193	0.0431167	0.0390917	0.0350498	0.0207688	0.259272	0.0309909	0.101507	0.180763	0.118319	0.0228218
TRAIL Signaling Pathway	346	25	161543	61.262	407	0.822403	2.66984e-14	7.023e-12	90.172	PIK3CA (30.565 %) MAP2K4 ( 3.445 %) CASP8 ( 1.325 %) PIK3R1 ( 0.883 %) PIK3CB ( 0.707 %) RIPK1 ( 0.442 %) DAP3 ( 0.353 %) IKBKB ( 0.353 %) CHUK ( 0.177 %) MAPK1 ( 0.177 %) MAPK3 ( 0.177 %) MAPK8 ( 0.177 %) TNFRSF10D ( 0.177 %) TNFSF10 ( 0.177 %) CASP10 ( 0.088 %) FADD ( 0.088 %) SMPD1 ( 0.088 %) TNFRSF10B ( 0.088 %) TRADD ( 0.088 %) TRAF2 ( 0.088 %)	0.00935786	0.0170891	0.00312907	0.00156576	0.00156576	0.00468993	0.00312907	0.00156576	0.00624834	0.0216989	0.00156576	0.00935786	0.00468993	0.00156576	0.00468993	0.00156576	0.00624834	0.00312907	0.00156576	0.00312907	0.00156576	0.00156576	0.00624834	0.00935786	0.00935786	0.010909	0.0293339	0.0369093	0.0753586	0.0323712	0.0293339	0.0262871	0.0155477	0.200748	0.0232307	0.0768064	0.138313	0.0897347	0.0170891
Class I PI3K Signaling Events	16	46	307204	117.347	475	0.607222	2.67549e-14	7.023e-12	90.3158	PIK3CA (30.565 %) PTEN ( 3.092 %) AKT1 ( 2.739 %) PIK3R1 ( 0.883 %) PIK3CB ( 0.707 %) KRAS ( 0.618 %) PIK3CG ( 0.618 %) PLCG1 ( 0.618 %) ARAP3 ( 0.530 %) BTK ( 0.530 %) INPPL1 ( 0.530 %) ITK ( 0.530 %) LYN ( 0.442 %) CYTH3 ( 0.353 %) INPP5D ( 0.353 %) PLCG2 ( 0.353 %) PLEKHA1 ( 0.353 %) SGK1 ( 0.353 %) NRAS ( 0.265 %) SYK ( 0.265 %) YES1 ( 0.265 %) ARF1 ( 0.177 %) BLK ( 0.177 %) FGR ( 0.177 %) PL…	0.0187801	0.0341604	0.00629962	0.00315479	0.00315479	0.00943453	0.00629962	0.00315479	0.0125596	0.0432726	0.00315479	0.0187801	0.00943453	0.00315479	0.00943453	0.00315479	0.0125596	0.00629962	0.00315479	0.00629962	0.00315479	0.00315479	0.0125596	0.0187801	0.0187801	0.0218756	0.0582691	0.0730305	0.146141	0.0642016	0.0582691	0.0522989	0.0311037	0.363549	0.0462909	0.148834	0.259314	0.172699	0.0341604
Hypoxic And Oxygen Homeostasis Regulation Of HIF 1 Alpha	274	19	105546	34.187	378	1.04363	2.67587e-14	7.023e-12	97.3545	TP53 (32.155 %) HIF3A ( 0.442 %) ARNT ( 0.265 %) HIF1A ( 0.265 %) OS9 ( 0.265 %) CUL2 ( 0.177 %) EGLN2 ( 0.177 %) NAA10 ( 0.177 %) COPS5 ( 0.088 %) EGLN1 ( 0.088 %) HSP90AA1 ( 0.088 %) RACK1 ( 0.088 %)	0.00510679	0.00934252	0.00170517	0.000852948	0.000852948	0.00255666	0.00170517	0.000852948	0.00340743	0.0118753	0.000852948	0.00510679	0.00255666	0.000852948	0.00255666	0.000852948	0.00340743	0.00170517	0.000852948	0.00170517	0.000852948	0.000852948	0.00340743	0.00510679	0.00510679	0.00595538	0.0160822	0.0202712	0.0417683	0.01776	0.0160822	0.0144016	0.00849682	0.114873	0.0127181	0.0425856	0.077866	0.0499102	0.00934252
PDGF Signaling Pathway (Mammal) ( PDGF Signaling Pathway )	285	29	178886	79.287	398	0.700681	2.69495e-14	7.023e-12	91.4573	PIK3CA (30.565 %) PIK3R1 ( 0.883 %) PDGFRA ( 0.795 %) PIK3CB ( 0.707 %) KRAS ( 0.618 %) SOS1 ( 0.618 %) STAT5B ( 0.530 %) SOS2 ( 0.442 %) ARHGEF6 ( 0.353 %) PIK3CD ( 0.353 %) NRAS ( 0.265 %) PDGFRB ( 0.265 %) RASA1 ( 0.265 %) SHC3 ( 0.265 %) STAT5A ( 0.265 %) GRB2 ( 0.177 %) PDGFB ( 0.177 %) PTPN11 ( 0.177 %) CRK ( 0.088 %) HRAS ( 0.088 %) NCK1 ( 0.088 %) PAK1 ( 0.088 %) RAF1 ( 0.088 %) SHC1 ( 0.…	0.0122933	0.0224221	0.00411466	0.00205945	0.00205945	0.00616564	0.00411466	0.00205945	0.0082124	0.0284495	0.00205945	0.0122933	0.00616564	0.00205945	0.00616564	0.00205945	0.0082124	0.00411466	0.00205945	0.00411466	0.00205945	0.00205945	0.0082124	0.0122933	0.0122933	0.0143274	0.0384127	0.0482737	0.0979441	0.0423693	0.0384127	0.0344398	0.0204047	0.255324	0.0304504	0.0998019	0.177864	0.11635	0.0224221
Regulation Of TP53 Activity Through Phosphorylation	170	89	524830	186.635	493	0.421854	2.71713e-14	7.023e-12	78.499	TP53 (32.155 %) ATM ( 2.032 %) ATR ( 1.590 %) TAF1 ( 1.590 %) BRCA1 ( 1.325 %) TAF1L ( 1.237 %) BRIP1 ( 0.883 %) UBC ( 0.795 %) TOPBP1 ( 0.618 %) SUPT16H ( 0.530 %) BLM ( 0.442 %) CCNA2 ( 0.442 %) NUAK1 ( 0.442 %) RAD50 ( 0.442 %) SSRP1 ( 0.442 %) TAF3 ( 0.442 %) DNA2 ( 0.353 %) HIPK1 ( 0.353 %) HIPK2 ( 0.353 %) PRKAA2 ( 0.353 %) RFC4 ( 0.353 %) BARD1 ( 0.265 %) CHEK2 ( 0.265 %) EXO1 ( 0.265 %) M…	0.031669	0.0572924	0.0106698	0.0053492	0.0053492	0.0159619	0.0106698	0.0053492	0.0212257	0.0723398	0.0053492	0.031669	0.0159619	0.0053492	0.0159619	0.0053492	0.0212257	0.0106698	0.0053492	0.0106698	0.0053492	0.0053492	0.0212257	0.031669	0.031669	0.0368488	0.0968869	0.120785	0.235228	0.106523	0.0968869	0.087147	0.0522225	0.53559	0.077302	0.239319	0.399227	0.275166	0.0572924
Signaling By FGFR3 Point Mutants In Cancer	123	22	118457	42.6997	378	0.947067	2.72228e-14	7.023e-12	95.5026	PIK3CA (30.565 %) PIK3R1 ( 0.883 %) KRAS ( 0.618 %) PLCG1 ( 0.618 %) SOS1 ( 0.618 %) GAB1 ( 0.353 %) FGF23 ( 0.265 %) NRAS ( 0.265 %) FGF9 ( 0.177 %) GRB2 ( 0.177 %) FGF1 ( 0.088 %) FGF18 ( 0.088 %) FGF8 ( 0.088 %) HRAS ( 0.088 %)	0.00642327	0.0117445	0.00214569	0.00107342	0.00107342	0.00321681	0.00214569	0.00107342	0.00428678	0.0149235	0.00107342	0.00642327	0.00321681	0.00107342	0.00321681	0.00107342	0.00428678	0.00214569	0.00107342	0.00214569	0.00107342	0.00107342	0.00428678	0.00642327	0.00642327	0.0074898	0.0201992	0.0254466	0.0522835	0.0223015	0.0201992	0.0180923	0.0106825	0.142369	0.0159809	0.0533008	0.0969974	0.0624075	0.0117445
Regulation Of TP53 Activity Through Methylation	169	19	177982	68.3934	405	0.772441	2.72479e-14	7.023e-12	94.0741	TP53 (32.155 %) ATM ( 2.032 %) UBC ( 0.795 %) EP300 ( 0.707 %) EHMT1 ( 0.442 %) CHEK2 ( 0.265 %) L3MBTL1 ( 0.265 %) MDM4 ( 0.265 %) PRMT5 ( 0.265 %) MDM2 ( 0.177 %) SMYD2 ( 0.177 %) TTC5 ( 0.177 %) JMY ( 0.088 %) KMT5A ( 0.088 %) SETD9 ( 0.088 %) UBA52 ( 0.088 %)	0.010509	0.0191821	0.00351534	0.00175922	0.00175922	0.00526837	0.00351534	0.00175922	0.00701832	0.0243494	0.00175922	0.010509	0.00526837	0.00175922	0.00526837	0.00175922	0.00701832	0.00351534	0.00175922	0.00351534	0.00175922	0.00175922	0.00701832	0.010509	0.010509	0.0122497	0.0329012	0.041378	0.0842743	0.0363008	0.0329012	0.0294895	0.0174536	0.222592	0.0260658	0.0858852	0.154031	0.100257	0.0191821
VEGFR1 Specific Signals	298	29	230519	87.6663	427	0.687595	2.75555e-14	7.023e-12	93.911	PIK3CA (30.565 %) AKT1 ( 2.739 %) NRP1 ( 0.972 %) PIK3R1 ( 0.883 %) PRKCB ( 0.795 %) NRP2 ( 0.707 %) PLCG1 ( 0.618 %) CBL ( 0.442 %) NOS3 ( 0.353 %) FLT1 ( 0.265 %) HIF1A ( 0.265 %) RASA1 ( 0.265 %) MAPK1 ( 0.177 %) MAPK3 ( 0.177 %) PRKACA ( 0.177 %) PRKCA ( 0.177 %) PTPN11 ( 0.177 %) CALM2 ( 0.088 %) CALM3 ( 0.088 %) HSP90AA1 ( 0.088 %) NCK1 ( 0.088 %) SHC2 ( 0.088 %)	0.0136873	0.0249502	0.00458341	0.00229434	0.00229434	0.00686723	0.00458341	0.00229434	0.00914581	0.031646	0.00229434	0.0136873	0.00686723	0.00229434	0.00686723	0.00229434	0.00914581	0.00458341	0.00229434	0.00458341	0.00229434	0.00229434	0.00914581	0.0136873	0.0136873	0.0159502	0.0427038	0.0536353	0.108499	0.0470915	0.0427038	0.0382959	0.0227079	0.279973	0.0338678	0.110544	0.196045	0.128743	0.0249502
PDGFR Alpha Signaling Pathway	286	22	126537	56.5756	383	0.83057	2.76971e-14	7.023e-12	92.9504	PIK3CA (30.565 %) PIK3R1 ( 0.883 %) PDGFRA ( 0.795 %) PLCG1 ( 0.618 %) SOS1 ( 0.618 %) ITGAV ( 0.530 %) JUN ( 0.530 %) JAK1 ( 0.442 %) RAPGEF1 ( 0.442 %) ELK1 ( 0.177 %) GRB2 ( 0.177 %) CRK ( 0.088 %) CRKL ( 0.088 %) CSNK2A1 ( 0.088 %) PRRT2 ( 0.088 %) SHB ( 0.088 %) SHC1 ( 0.088 %) SRF ( 0.088 %)	0.0086086	0.0157258	0.00287781	0.00143994	0.00143994	0.00431361	0.00287781	0.00143994	0.00574734	0.0199716	0.00143994	0.0086086	0.00431361	0.00143994	0.00431361	0.00143994	0.00574734	0.00287781	0.00143994	0.00287781	0.00143994	0.00143994	0.00574734	0.0086086	0.0086086	0.0100361	0.0270072	0.0339923	0.0695146	0.0298073	0.0270072	0.024199	0.0143065	0.186216	0.0213828	0.0708545	0.127936	0.0828266	0.0157258
Signaling By FGFR1 In Disease	119	33	251575	90.7902	398	0.641844	2.77246e-14	7.023e-12	92.7136	PIK3CA (30.565 %) PIK3R1 ( 0.883 %) KRAS ( 0.618 %) MYO18A ( 0.618 %) PLCG1 ( 0.618 %) SOS1 ( 0.618 %) ZMYM2 ( 0.530 %) CNTRL ( 0.442 %) FGF6 ( 0.353 %) GAB1 ( 0.353 %) LRRFIP1 ( 0.353 %) TRIM24 ( 0.353 %) FGF23 ( 0.265 %) NRAS ( 0.265 %) BCR ( 0.177 %) FGF9 ( 0.177 %) GRB2 ( 0.177 %) BAG4 ( 0.088 %) CPSF6 ( 0.088 %) CUX1 ( 0.088 %) FGF1 ( 0.088 %) FGF8 ( 0.088 %) FGFR1OP2 ( 0.088 %) HRAS ( 0.088…	0.0142119	0.0259007	0.00475991	0.00238279	0.00238279	0.00713136	0.00475991	0.00238279	0.00949716	0.0328473	0.00238279	0.0142119	0.00713136	0.00238279	0.00713136	0.00238279	0.00949716	0.00475991	0.00238279	0.00475991	0.00238279	0.00238279	0.00949716	0.0142119	0.0142119	0.0165608	0.0443151	0.055647	0.112442	0.0488641	0.0443151	0.0397444	0.023574	0.289045	0.0351518	0.114557	0.202789	0.133366	0.0259007
Constitutive Signaling By Aberrant PI3K In Cancer	19	61	347099	124.174	448	0.557247	2.78839e-14	7.023e-12	85.2679	PIK3CA (30.565 %) ERBB2 ( 1.502 %) ERBB3 ( 1.325 %) ERBB4 ( 1.060 %) PIK3R1 ( 0.883 %) EGFR ( 0.795 %) PDGFRA ( 0.795 %) KL ( 0.707 %) PIK3CB ( 0.707 %) FGFR2 ( 0.618 %) CD19 ( 0.530 %) KIT ( 0.530 %) FGF6 ( 0.353 %) GAB1 ( 0.353 %) KLB ( 0.353 %) PIK3CD ( 0.353 %) EGF ( 0.265 %) FGF23 ( 0.265 %) FGFR4 ( 0.265 %) IRS1 ( 0.265 %) KITLG ( 0.265 %) NRG1 ( 0.265 %) PDGFRB ( 0.265 %) VAV1 ( 0.265 %) C…	0.0199865	0.0363365	0.00670706	0.00335917	0.00335917	0.0100437	0.00670706	0.00335917	0.0133691	0.0460152	0.00335917	0.0199865	0.0100437	0.00335917	0.0100437	0.00335917	0.0133691	0.00670706	0.00335917	0.00670706	0.00335917	0.00335917	0.0133691	0.0199865	0.0199865	0.0232786	0.0619309	0.0775811	0.15485	0.0682226	0.0619309	0.0555968	0.0330885	0.38194	0.0492198	0.157689	0.273603	0.182815	0.0363365
TP53 Regulates Transcription Of DNA Repair Genes	186	61	429440	155.833	453	0.463438	2.81035e-14	7.023e-12	81.6777	TP53 (32.155 %) ATM ( 2.032 %) ATR ( 1.590 %) BRCA1 ( 1.325 %) CDK12 ( 1.060 %) MDC1 ( 0.883 %) SUPT5H ( 0.707 %) POLR2A ( 0.618 %) FANCD2 ( 0.530 %) JUN ( 0.530 %) SUPT16H ( 0.530 %) MSH2 ( 0.442 %) SSRP1 ( 0.442 %) FANCI ( 0.353 %) CCNH ( 0.265 %) CCNT1 ( 0.265 %) ERCC2 ( 0.265 %) FANCC ( 0.265 %) NELFCD ( 0.265 %) POLR2H ( 0.265 %) TCEA1 ( 0.265 %) ATF2 ( 0.177 %) CCNT2 ( 0.177 %) CDK13 ( 0.17…	0.0257593	0.0467178	0.00866124	0.00434004	0.00434004	0.0129637	0.00866124	0.00434004	0.0172475	0.0590758	0.00434004	0.0257593	0.0129637	0.00434004	0.0129637	0.00434004	0.0172475	0.00866124	0.00434004	0.00866124	0.00434004	0.00434004	0.0172475	0.0257593	0.0257593	0.0299875	0.0793176	0.0991239	0.195452	0.0872918	0.0793176	0.0712737	0.0425625	0.463117	0.0631595	0.198943	0.338471	0.229695	0.0467178
VEGFR3 Signaling In Lymphatic Endothelium	301	26	202730	95.0264	437	0.662637	2.82471e-14	7.023e-12	89.016	PIK3CA (30.565 %) MAP2K4 ( 3.445 %) AKT1 ( 2.739 %) PIK3R1 ( 0.883 %) COL1A2 ( 0.707 %) SOS1 ( 0.618 %) COL1A1 ( 0.530 %) FN1 ( 0.442 %) ITGA1 ( 0.442 %) ITGA2 ( 0.353 %) ITGB1 ( 0.353 %) FLT4 ( 0.265 %) ITGA5 ( 0.265 %) CREB1 ( 0.177 %) GRB2 ( 0.177 %) ITGA4 ( 0.177 %) MAPK1 ( 0.177 %) MAPK14 ( 0.177 %) MAPK3 ( 0.177 %) RPS6KA1 ( 0.177 %) CRK ( 0.088 %) PRRT2 ( 0.088 %) SHC1 ( 0.088 %)	0.0149275	0.0271967	0.00500079	0.00250353	0.00250353	0.0074918	0.00500079	0.00250353	0.00997657	0.0344847	0.00250353	0.0149275	0.0074918	0.00250353	0.0074918	0.00250353	0.00997657	0.00500079	0.00250353	0.00500079	0.00250353	0.00250353	0.00997657	0.0149275	0.0149275	0.0173936	0.0465103	0.0583861	0.117797	0.0512785	0.0465103	0.0417182	0.0247551	0.301244	0.0369019	0.120006	0.211902	0.139636	0.0271967
PDGFR Beta Signaling Pathway	96	125	847363	277.283	543	0.291877	2.82642e-14	7.023e-12	72.9282	PIK3CA (30.565 %) MAP2K4 ( 3.445 %) PTEN ( 3.092 %) LRP1 ( 1.148 %) DOCK4 ( 0.883 %) PIK3R1 ( 0.883 %) ARHGAP35 ( 0.795 %) BRAF ( 0.795 %) PIK3CB ( 0.707 %) ACTN4 ( 0.618 %) CYFIP2 ( 0.618 %) JAK2 ( 0.618 %) KRAS ( 0.618 %) NCKAP1 ( 0.618 %) PIK3CG ( 0.618 %) PLCG1 ( 0.618 %) SOS1 ( 0.618 %) ABL1 ( 0.530 %) EPS8 ( 0.530 %) ITGAV ( 0.530 %) ITGB3 ( 0.530 %) JUN ( 0.530 %) PLA2G4A ( 0.530 %) STAT3 …	0.0509166	0.0913611	0.0172687	0.00867195	0.00867195	0.0257909	0.0172687	0.00867195	0.0342392	0.114796	0.00867195	0.0509166	0.0257909	0.00867195	0.0257909	0.00867195	0.0342392	0.0172687	0.00867195	0.0172687	0.00867195	0.00867195	0.0342392	0.0509166	0.0509166	0.059147	0.152518	0.188633	0.353052	0.167153	0.152518	0.137626	0.0834125	0.712202	0.122472	0.358662	0.562828	0.407015	0.0913611
T Cell Activation	129	60	380090	155.93	486	0.493707	2.83101e-14	7.023e-12	88.0658	PIK3CA (30.565 %) AKT1 ( 2.739 %) ITPR1 ( 1.325 %) PRKCQ ( 1.060 %) PIK3R1 ( 0.883 %) BRAF ( 0.795 %) PIK3CB ( 0.707 %) PIK3CG ( 0.618 %) PLCG1 ( 0.618 %) SOS1 ( 0.618 %) JUN ( 0.530 %) VAV3 ( 0.530 %) PTPRC ( 0.442 %) SOS2 ( 0.442 %) AKT2 ( 0.353 %) AKT3 ( 0.353 %) ARAF ( 0.353 %) IKBKB ( 0.353 %) PAK2 ( 0.353 %) PIK3CD ( 0.353 %) PPP3CB ( 0.353 %) CD3G ( 0.265 %) LCP2 ( 0.265 %) NRAS ( 0.265 %)…	0.0257774	0.0467502	0.00866736	0.00434311	0.00434311	0.0129728	0.00866736	0.00434311	0.0172596	0.0591166	0.00434311	0.0257774	0.0129728	0.00434311	0.0129728	0.00434311	0.0172596	0.00866736	0.00434311	0.00866736	0.00434311	0.00434311	0.0172596	0.0257774	0.0257774	0.0300085	0.0793717	0.0991907	0.195576	0.0873511	0.0793717	0.0713225	0.0425921	0.463355	0.0632029	0.19907	0.338665	0.229838	0.0467502
E Cadherin Signaling In Keratinocytes	245	21	167869	78.148	448	0.75836	2.83412e-14	7.023e-12	86.8304	PIK3CA (30.565 %) CDH1 ( 6.095 %) AKT1 ( 2.739 %) CASR ( 1.148 %) PIK3R1 ( 0.883 %) EGFR ( 0.795 %) PLCG1 ( 0.618 %) AKT2 ( 0.353 %) CTNNA1 ( 0.353 %) FMN1 ( 0.353 %) PIP5K1A ( 0.265 %) CTNNB1 ( 0.177 %) AJUBA ( 0.088 %) CTNND1 ( 0.088 %) FYN ( 0.088 %) JUP ( 0.088 %) RHOA ( 0.088 %) VASP ( 0.088 %) ZYX ( 0.088 %)	0.0121052	0.0220809	0.00405147	0.00202779	0.00202779	0.00607105	0.00405147	0.00202779	0.00808653	0.0280179	0.00202779	0.0121052	0.00607105	0.00202779	0.00607105	0.00202779	0.00808653	0.00405147	0.00202779	0.00405147	0.00202779	0.00202779	0.00808653	0.0121052	0.0121052	0.0141085	0.0378329	0.0475488	0.0965121	0.0417311	0.0378329	0.0339189	0.0200939	0.251937	0.0299889	0.0983441	0.175383	0.114667	0.0220809
Regulation Of TP53 Activity Through Acetylation	167	23	203598	94.9947	429	0.654758	2.84171e-14	7.023e-12	90.676	TP53 (32.155 %) AKT1 ( 2.739 %) CHD4 ( 1.325 %) EP300 ( 0.707 %) CHD3 ( 0.618 %) HDAC1 ( 0.530 %) KAT6A ( 0.530 %) AKT2 ( 0.353 %) AKT3 ( 0.353 %) BRPF3 ( 0.353 %) BRD7 ( 0.265 %) BRPF1 ( 0.265 %) HDAC2 ( 0.265 %) RBBP7 ( 0.265 %) BRD1 ( 0.177 %) GATAD2A ( 0.177 %) GATAD2B ( 0.177 %) MBD3 ( 0.088 %) MEAF6 ( 0.088 %) MTA2 ( 0.088 %) PML ( 0.088 %) RBBP4 ( 0.088 %)	0.0149221	0.0271869	0.00499898	0.00250262	0.00250262	0.00748909	0.00499898	0.00250262	0.00997296	0.0344724	0.00250262	0.0149221	0.00748909	0.00250262	0.00748909	0.00250262	0.00997296	0.00499898	0.00250262	0.00499898	0.00250262	0.00250262	0.00997296	0.0149221	0.0149221	0.0173874	0.0464938	0.0583656	0.117757	0.0512604	0.0464938	0.0417033	0.0247462	0.301153	0.0368887	0.119965	0.211834	0.139589	0.0271869
Angiopoietin Receptor Tie2 Mediated Signaling	266	50	313954	132.16	460	0.541657	2.85217e-14	7.023e-12	90.6522	PIK3CA (30.565 %) AKT1 ( 2.739 %) PIK3R1 ( 0.883 %) STAT5B ( 0.530 %) FN1 ( 0.442 %) GRB14 ( 0.442 %) PLG ( 0.442 %) ANGPT4 ( 0.353 %) BMX ( 0.353 %) F2 ( 0.353 %) GRB7 ( 0.353 %) ITGB1 ( 0.353 %) NFKB1 ( 0.353 %) NOS3 ( 0.353 %) PLD2 ( 0.353 %) PTK2 ( 0.353 %) RPS6KB1 ( 0.353 %) TEK ( 0.353 %) ANGPT1 ( 0.265 %) ELF1 ( 0.265 %) ETS1 ( 0.265 %) ITGA5 ( 0.265 %) MMP2 ( 0.265 %) RASA1 ( 0.265 %) STA…	0.0214149	0.0389099	0.00718986	0.00360142	0.00360142	0.0107654	0.00718986	0.00360142	0.014328	0.0492564	0.00360142	0.0214149	0.0107654	0.00360142	0.0107654	0.00360142	0.014328	0.00718986	0.00360142	0.00718986	0.00360142	0.00360142	0.014328	0.0214149	0.0214149	0.0249392	0.0662536	0.082947	0.16506	0.0729671	0.0662536	0.0594915	0.0354361	0.403056	0.0526804	0.168067	0.290186	0.194647	0.0389099
TP53 Regulates Transcription Of Several Additional Cell Death Genes Whose Specific Roles In P53 Dependent Apoptosis Remain Uncertain	188	14	83208	40.5566	382	0.974002	2.87479e-14	7.023e-12	97.3822	TP53 (32.155 %) TP53BP2 ( 0.442 %) CHM ( 0.353 %) PPP1R13B ( 0.265 %) TP63 ( 0.265 %) BCL6 ( 0.177 %) NDRG1 ( 0.177 %) PERP ( 0.177 %) RABGGTA ( 0.177 %) RABGGTB ( 0.177 %) TP73 ( 0.177 %) BCL2L14 ( 0.088 %) TP53I3 ( 0.088 %)	0.00609013	0.0111369	0.00203418	0.00101761	0.00101761	0.00304971	0.00203418	0.00101761	0.00406422	0.0141526	0.00101761	0.00609013	0.00304971	0.00101761	0.00304971	0.00101761	0.00406422	0.00203418	0.00101761	0.00203418	0.00101761	0.00101761	0.00406422	0.00609013	0.00609013	0.00710154	0.0191585	0.0241389	0.0496322	0.0211537	0.0191585	0.0171592	0.0101296	0.13549	0.0151558	0.0505993	0.0921915	0.0592591	0.0111369
G Beta:gamma Signalling Through PI3Kgamma	58	48	245502	83.1261	430	0.713731	2.8862e-14	7.023e-12	92.7907	PIK3CA (30.565 %) AKT1 ( 2.739 %) PIK3R1 ( 0.883 %) PIK3CB ( 0.707 %) JAK2 ( 0.618 %) PIK3CG ( 0.618 %) JAK1 ( 0.442 %) JAK3 ( 0.442 %) AKT2 ( 0.353 %) AKT3 ( 0.353 %) GAB2 ( 0.353 %) PIK3CD ( 0.353 %) GNB2 ( 0.265 %) GNB3 ( 0.265 %) IL3RA ( 0.265 %) CSF2RB ( 0.177 %) GRB2 ( 0.177 %) IL2RB ( 0.177 %) IL2RG ( 0.177 %) PIK3R3 ( 0.177 %) CSF2RA ( 0.088 %) GNB1 ( 0.088 %) GNG10 ( 0.088 %) GNG11 ( 0.0…	0.0129296	0.0235765	0.00432858	0.00216664	0.00216664	0.00648584	0.00432858	0.00216664	0.00863843	0.0299094	0.00216664	0.0129296	0.00648584	0.00216664	0.00648584	0.00216664	0.00863843	0.00432858	0.00216664	0.00432858	0.00216664	0.00216664	0.00863843	0.0129296	0.0129296	0.0150682	0.0403732	0.050724	0.102776	0.044527	0.0403732	0.0362013	0.0214564	0.266674	0.0320113	0.10472	0.186211	0.122027	0.0235765
Signaling Events Mediated By Focal Adhesion Kinase	125	63	486599	195.689	477	0.386952	2.88892e-14	7.023e-12	81.9706	PIK3CA (30.565 %) MAP2K4 ( 3.445 %) TLN1 ( 1.325 %) MYLK ( 0.883 %) PIK3R1 ( 0.883 %) ACTN2 ( 0.795 %) ARHGAP35 ( 0.795 %) BRAF ( 0.795 %) ACTN4 ( 0.618 %) ARHGEF11 ( 0.618 %) PLCG1 ( 0.618 %) SOS1 ( 0.618 %) ITGAV ( 0.530 %) JUN ( 0.530 %) RAPGEF1 ( 0.442 %) ROCK2 ( 0.442 %) ASAP1 ( 0.353 %) BMX ( 0.353 %) GRB7 ( 0.353 %) ITGB1 ( 0.353 %) MAPK8IP3 ( 0.353 %) PTK2 ( 0.353 %) VCL ( 0.353 %) ARHGEF…	0.0334636	0.060493	0.0112813	0.00565666	0.00565666	0.0168742	0.0112813	0.00565666	0.0224354	0.0763464	0.00565666	0.0334636	0.0168742	0.00565666	0.0168742	0.00565666	0.0224354	0.0112813	0.00565666	0.0112813	0.00565666	0.00565666	0.0224354	0.0334636	0.0334636	0.038931	0.102176	0.127284	0.246959	0.112305	0.102176	0.0919323	0.0551482	0.555675	0.0815712	0.251219	0.416616	0.288488	0.060493
Recruitment And ATM Mediated Phosphorylation Of Repair And Signaling Proteins At DNA Double Strand Breaks	326	75	382049	137.858	468	0.530814	2.89763e-14	7.023e-12	83.3333	TP53 (32.155 %) ATM ( 2.032 %) BRCA1 ( 1.325 %) HERC2 ( 1.325 %) MDC1 ( 0.883 %) UBC ( 0.795 %) BAZ1B ( 0.707 %) KDM4A ( 0.618 %) ABL1 ( 0.530 %) EYA1 ( 0.530 %) HIST1H2BC ( 0.530 %) TP53BP1 ( 0.530 %) RAD50 ( 0.442 %) BRE ( 0.353 %) HIST1H2BD ( 0.353 %) HIST2H2BE ( 0.353 %) APBB1 ( 0.265 %) BARD1 ( 0.265 %) BRCC3 ( 0.265 %) CHEK2 ( 0.265 %) EYA3 ( 0.265 %) EYA4 ( 0.265 %) HIST1H2BH ( 0.265 %) HI…	0.0224453	0.0407643	0.00753844	0.00377635	0.00377635	0.0112863	0.00753844	0.00377635	0.0150201	0.0515906	0.00377635	0.0224453	0.0112863	0.00377635	0.0112863	0.00377635	0.0150201	0.00753844	0.00377635	0.00753844	0.00377635	0.00377635	0.0150201	0.0224453	0.0224453	0.0261369	0.0693635	0.0868033	0.172358	0.076379	0.0693635	0.0622947	0.0371282	0.417858	0.0551721	0.175484	0.301928	0.203087	0.0407643
TP53 Regulates Metabolic Genes	183	85	479684	164.329	485	0.470027	2.93522e-14	7.023e-12	84.7423	TP53 (32.155 %) PTEN ( 3.092 %) AKT1 ( 2.739 %) MTOR ( 1.325 %) AGO4 ( 0.707 %) TNRC6B ( 0.618 %) AGO1 ( 0.530 %) AGO2 ( 0.530 %) RPTOR ( 0.442 %) TNRC6C ( 0.442 %) TSC1 ( 0.442 %) AKT2 ( 0.353 %) AKT3 ( 0.353 %) G6PD ( 0.353 %) PRKAA2 ( 0.353 %) TNRC6A ( 0.353 %) TSC2 ( 0.353 %) AGO3 ( 0.265 %) GPI ( 0.265 %) LAMTOR2 ( 0.265 %) LRPPRC ( 0.265 %) MOV10 ( 0.265 %) PRKAG3 ( 0.265 %) RHEB ( 0.265 %)…	0.0273598	0.0495869	0.00920438	0.00461283	0.00461283	0.0137748	0.00920438	0.00461283	0.018324	0.0626786	0.00461283	0.0273598	0.0137748	0.00461283	0.0137748	0.00461283	0.018324	0.00920438	0.00461283	0.00920438	0.00461283	0.00461283	0.018324	0.0273598	0.0273598	0.0318464	0.0840986	0.105029	0.206399	0.0925289	0.0840986	0.0755899	0.0451825	0.483748	0.0670023	0.21006	0.355469	0.242256	0.0495869
Signaling By FGFR2 In Disease	121	27	135656	52.0737	386	0.869969	2.94165e-14	7.023e-12	93.7824	PIK3CA (30.565 %) PIK3R1 ( 0.883 %) FGFR2 ( 0.618 %) KRAS ( 0.618 %) PLCG1 ( 0.618 %) SOS1 ( 0.618 %) FGF6 ( 0.353 %) GAB1 ( 0.353 %) FGF23 ( 0.265 %) NRAS ( 0.265 %) FGF3 ( 0.177 %) FGF7 ( 0.177 %) FGF9 ( 0.177 %) GRB2 ( 0.177 %) FGF1 ( 0.088 %) FGF10 ( 0.088 %) FGF18 ( 0.088 %) FGF8 ( 0.088 %) HRAS ( 0.088 %)	0.00789421	0.0144251	0.00263836	0.00132005	0.00132005	0.00395492	0.00263836	0.00132005	0.00526975	0.018323	0.00132005	0.00789421	0.00395492	0.00132005	0.00395492	0.00132005	0.00526975	0.00263836	0.00132005	0.00263836	0.00132005	0.00132005	0.00526975	0.00789421	0.00789421	0.00920383	0.0247852	0.0312049	0.0639123	0.0273582	0.0247852	0.0222054	0.0131224	0.172124	0.0196188	0.065148	0.117933	0.076196	0.0144251
Interleukin Signaling Pathway	74	86	472862	177.533	508	0.456584	2.94815e-14	7.023e-12	86.6142	PIK3CA (30.565 %) AKT1 ( 2.739 %) MTOR ( 1.325 %) CDKN1B ( 0.883 %) BRAF ( 0.795 %) PIK3CB ( 0.707 %) SOS1 ( 0.618 %) STAT4 ( 0.618 %) IL4R ( 0.530 %) IL6ST ( 0.530 %) STAT3 ( 0.530 %) STAT5B ( 0.530 %) IL10RB ( 0.442 %) IL13RA2 ( 0.442 %) JAK3 ( 0.442 %) SOS2 ( 0.442 %) AKT2 ( 0.353 %) AKT3 ( 0.353 %) ARAF ( 0.353 %) IKBKB ( 0.353 %) IL11RA ( 0.353 %) IL12RB1 ( 0.353 %) MAPK6 ( 0.353 %) NOS3 ( 0…	0.0298916	0.0541176	0.0100648	0.00504514	0.00504514	0.0150592	0.0100648	0.00504514	0.0200284	0.0683618	0.00504514	0.0298916	0.0150592	0.00504514	0.0150592	0.00504514	0.0200284	0.0100648	0.00504514	0.0100648	0.00504514	0.00504514	0.0200284	0.0298916	0.0298916	0.0347859	0.0916271	0.114311	0.223451	0.10077	0.0916271	0.0823915	0.0493213	0.514842	0.073062	0.227369	0.381527	0.261751	0.0541176
Intracellular Signalling Through Adenosine Receptor A2a And Adenosine// Intracellular Signalling Through Adenosine Receptor A2b And Adenosine	75	39	272781	110.272	418	0.57871	2.97214e-14	7.023e-12	92.3445	PIK3CA (30.565 %) AKT1 ( 2.739 %) BRAF ( 0.795 %) JUN ( 0.530 %) MAP3K4 ( 0.530 %) PRKCZ ( 0.530 %) IKBKB ( 0.353 %) NFKB1 ( 0.353 %) ARHGEF7 ( 0.265 %) GNAS ( 0.265 %) RAPGEF2 ( 0.265 %) ADCY2 ( 0.177 %) ADORA2A ( 0.177 %) ATF2 ( 0.177 %) CHUK ( 0.177 %) CREB1 ( 0.177 %) ELK1 ( 0.177 %) MAP2K7 ( 0.177 %) MAPK1 ( 0.177 %) MAPK8 ( 0.177 %) NFKB2 ( 0.177 %) NFKBIA ( 0.177 %) RPS6KA1 ( 0.177 %) ADOR…	0.0175438	0.0319283	0.00588248	0.00294558	0.00294558	0.00881073	0.00588248	0.00294558	0.0117304	0.0404578	0.00294558	0.0175438	0.00881073	0.00294558	0.00881073	0.00294558	0.0117304	0.00588248	0.00294558	0.00588248	0.00294558	0.00294558	0.0117304	0.0175438	0.0175438	0.0204377	0.0545068	0.0683501	0.137134	0.0600686	0.0545068	0.048912	0.0290684	0.34416	0.0432842	0.139676	0.2444	0.162216	0.0319283
CD28 Dependent PI3K/Akt Signaling	12	22	160289	62.6064	413	0.819331	3.04327e-14	7.023e-12	95.8838	PIK3CA (30.565 %) AKT1 ( 2.739 %) MTOR ( 1.325 %) PIK3R1 ( 0.883 %) RICTOR ( 0.707 %) AKT2 ( 0.353 %) AKT3 ( 0.353 %) CD86 ( 0.177 %) MAPKAP1 ( 0.177 %) PIK3R3 ( 0.177 %) CD28 ( 0.088 %) CD80 ( 0.088 %) FYN ( 0.088 %) LCK ( 0.088 %) MAP3K8 ( 0.088 %) TRIB3 ( 0.088 %)	0.00957385	0.017482	0.00320152	0.00160204	0.00160204	0.00479844	0.00320152	0.00160204	0.00639279	0.0221966	0.00160204	0.00957385	0.00479844	0.00160204	0.00479844	0.00160204	0.00639279	0.00320152	0.00160204	0.00320152	0.00160204	0.00160204	0.00639279	0.00957385	0.00957385	0.0111606	0.0300039	0.0377489	0.0770373	0.0331094	0.0300039	0.0268885	0.0159054	0.204891	0.023763	0.0785159	0.141283	0.0917174	0.017482
PI5P// PP2A And IER3 Regulate PI3K/AKT Signaling	103	83	493126	177.547	497	0.447042	3.05423e-14	7.023e-12	82.0926	PIK3CA (30.565 %) AKT1 ( 2.739 %) ERBB2 ( 1.502 %) ERBB3 ( 1.325 %) ERBB4 ( 1.060 %) PIK3R1 ( 0.883 %) EGFR ( 0.795 %) PDGFRA ( 0.795 %) KL ( 0.707 %) PIK3CB ( 0.707 %) FGFR2 ( 0.618 %) CD19 ( 0.530 %) INSR ( 0.530 %) KIT ( 0.530 %) PIP4K2C ( 0.530 %) FGF6 ( 0.353 %) GAB1 ( 0.353 %) KLB ( 0.353 %) PIK3CD ( 0.353 %) PIP5K1C ( 0.353 %) EGF ( 0.265 %) FGF23 ( 0.265 %) FGFR4 ( 0.265 %) IRS1 ( 0.265 %…	0.0298944	0.0541225	0.0100658	0.00504561	0.00504561	0.0150606	0.0100658	0.00504561	0.0200302	0.068368	0.00504561	0.0298944	0.0150606	0.00504561	0.0150606	0.00504561	0.0200302	0.0100658	0.00504561	0.0100658	0.00504561	0.00504561	0.0200302	0.0298944	0.0298944	0.0347891	0.0916353	0.114321	0.223469	0.100779	0.0916353	0.0823989	0.0493258	0.514875	0.0730686	0.227387	0.381555	0.261772	0.0541225
TP53 Regulates Transcription Of Genes Involved In G2 Cell Cycle Arrest	134	18	81837	38.0738	390	1.01044	3.08124e-14	7.023e-12	96.6667	TP53 (32.155 %) EP300 ( 0.707 %) RBL1 ( 0.530 %) E2F4 ( 0.353 %) TFDP2 ( 0.353 %) RBL2 ( 0.265 %) TFDP1 ( 0.265 %) BAX ( 0.177 %) CARM1 ( 0.177 %) CCNB1 ( 0.177 %) CDC25C ( 0.177 %) AURKA ( 0.088 %) PRMT1 ( 0.088 %) SFN ( 0.088 %) ZNF385A ( 0.088 %)	0.00570562	0.0104354	0.0019055	0.000953205	0.000953205	0.00285689	0.0019055	0.000953205	0.00380737	0.0132625	0.000953205	0.00570562	0.00285689	0.000953205	0.00285689	0.000953205	0.00380737	0.0019055	0.000953205	0.0019055	0.000953205	0.000953205	0.00380737	0.00570562	0.00570562	0.00665338	0.0179564	0.0226279	0.046564	0.0198276	0.0179564	0.0160815	0.00949126	0.127483	0.0142031	0.0474728	0.0866148	0.0556133	0.0104354
CDC42 Signaling Events	13	71	528189	196.272	510	0.414712	3.08176e-14	7.023e-12	77.451	PIK3CA (30.565 %) CDH1 ( 6.095 %) MAP2K4 ( 3.445 %) MTOR ( 1.325 %) CDC42BPA ( 1.060 %) PIK3R1 ( 0.883 %) BRAF ( 0.795 %) APC ( 0.707 %) DLG1 ( 0.618 %) EPS8 ( 0.530 %) IQGAP3 ( 0.530 %) JUN ( 0.530 %) PLD1 ( 0.530 %) PRKCZ ( 0.530 %) CBL ( 0.442 %) DIAPH3 ( 0.442 %) EXOC7 ( 0.442 %) IQGAP1 ( 0.442 %) LIMK1 ( 0.442 %) RASGRF1 ( 0.442 %) TIAM1 ( 0.442 %) ARHGEF6 ( 0.353 %) CTNNA1 ( 0.353 %) ENAH (…	0.0335801	0.0607005	0.011321	0.00567663	0.00567663	0.0169334	0.011321	0.00567663	0.0225139	0.076606	0.00567663	0.0335801	0.0169334	0.00567663	0.0169334	0.00567663	0.0225139	0.011321	0.00567663	0.011321	0.00567663	0.00567663	0.0225139	0.0335801	0.0335801	0.0390661	0.102519	0.127705	0.247715	0.112679	0.102519	0.0922422	0.055338	0.556949	0.0818478	0.251986	0.417727	0.289345	0.0607005
Signaling Events Mediated By VEGFR1 And VEGFR2	126	69	490534	186.723	479	0.409139	3.09702e-14	7.023e-12	87.6827	PIK3CA (30.565 %) AKT1 ( 2.739 %) PIK3R1 ( 0.883 %) BRAF ( 0.795 %) PRKCB ( 0.795 %) PLCG1 ( 0.618 %) ROCK1 ( 0.618 %) ITGAV ( 0.530 %) ITGB3 ( 0.530 %) CBL ( 0.442 %) IQGAP1 ( 0.442 %) MYOF ( 0.442 %) CTNNA1 ( 0.353 %) GAB1 ( 0.353 %) GRB10 ( 0.353 %) HGS ( 0.353 %) KDR ( 0.353 %) NOS3 ( 0.353 %) PAK2 ( 0.353 %) PTK2 ( 0.353 %) PTK2B ( 0.353 %) VCL ( 0.353 %) FLT1 ( 0.265 %) NEDD4 ( 0.265 %) PRK…	0.0316862	0.0573231	0.0106756	0.00535214	0.00535214	0.0159706	0.0106756	0.00535214	0.0212373	0.0723782	0.00535214	0.0316862	0.0159706	0.00535214	0.0159706	0.00535214	0.0212373	0.0106756	0.00535214	0.0106756	0.00535214	0.00535214	0.0212373	0.0316862	0.0316862	0.0368688	0.0969378	0.120847	0.235341	0.106579	0.0969378	0.087193	0.0522506	0.535787	0.077343	0.239434	0.399396	0.275295	0.0573231
Apoptotic Cleavage Of Cell Adhesion Proteins	334	11	83628	37.0418	105	0.452498	3.10937e-14	7.023e-12	97.1429	CDH1 (6.10 %) DSP (1.33 %) TJP1 (0.62 %) DSG3 (0.44 %) DSG1 (0.35 %) CTNNB1 (0.18 %) DSG2 (0.18 %) PKP1 (0.18 %) TJP2 (0.18 %)	0.00554624	0.0101446	0.00185218	0.000926518	0.000926518	0.00277698	0.00185218	0.000926518	0.00370092	0.0128934	0.000926518	0.00554624	0.00277698	0.000926518	0.00277698	0.000926518	0.00370092	0.00185218	0.000926518	0.00185218	0.000926518	0.000926518	0.00370092	0.00554624	0.00554624	0.00646762	0.0174578	0.0220011	0.0452897	0.0192777	0.0174578	0.0156346	0.00922664	0.124144	0.013808	0.0461743	0.084294	0.0540985	0.0101446
Pre NOTCH Transcription And Translation	289	29	320666	143.053	426	0.473913	3.1184e-14	7.023e-12	86.1502	TP53 (32.155 %) NOTCH2 ( 1.060 %) CREBBP ( 0.795 %) AGO4 ( 0.707 %) EP300 ( 0.707 %) NOTCH4 ( 0.618 %) TNRC6B ( 0.618 %) AGO1 ( 0.530 %) AGO2 ( 0.530 %) JUN ( 0.530 %) MAML2 ( 0.442 %) MAML3 ( 0.442 %) NOTCH1 ( 0.442 %) TNRC6C ( 0.442 %) E2F1 ( 0.353 %) MAMLD1 ( 0.353 %) TFDP2 ( 0.353 %) TNRC6A ( 0.353 %) AGO3 ( 0.265 %) KAT2B ( 0.265 %) MOV10 ( 0.265 %) NOTCH3 ( 0.265 %) TFDP1 ( 0.265 %) MAML1 (…	0.0233931	0.0424688	0.00785932	0.00393741	0.00393741	0.0117658	0.00785932	0.00393741	0.0156569	0.053735	0.00393741	0.0233931	0.0117658	0.00393741	0.0117658	0.00393741	0.0156569	0.00785932	0.00393741	0.00785932	0.00393741	0.00393741	0.0156569	0.0233931	0.0233931	0.0272384	0.072218	0.09034	0.179022	0.0795097	0.072218	0.0648685	0.0386837	0.431163	0.0574608	0.182255	0.312568	0.210781	0.0424688
Insulin Receptor Signaling ( Insulin Receptor Signaling (D. Melanogaster) )// Insulin Receptor Signaling (Mammal) ( Insulin Receptor Signaling (Mammal) )	69	62	435972	156.001	464	0.473391	3.13798e-14	7.023e-12	88.1466	PIK3CA (30.565 %) AKT1 ( 2.739 %) MTOR ( 1.325 %) PIK3R1 ( 0.883 %) BRAF ( 0.795 %) IRS4 ( 0.795 %) PIK3CB ( 0.707 %) KRAS ( 0.618 %) SOS1 ( 0.618 %) INSR ( 0.530 %) RPTOR ( 0.442 %) SOS2 ( 0.442 %) AKT2 ( 0.353 %) AKT3 ( 0.353 %) ARAF ( 0.353 %) PIK3CD ( 0.353 %) PRKAA2 ( 0.353 %) TSC2 ( 0.353 %) IRS1 ( 0.265 %) NRAS ( 0.265 %) PPP2R5D ( 0.265 %) PRKAG3 ( 0.265 %) SHC3 ( 0.265 %) FKBP8 ( 0.177 %…	0.0257906	0.046774	0.00867186	0.00434537	0.00434537	0.0129796	0.00867186	0.00434537	0.0172685	0.0591465	0.00434537	0.0257906	0.0129796	0.00434537	0.0129796	0.00434537	0.0172685	0.00867186	0.00434537	0.00867186	0.00434537	0.00434537	0.0172685	0.0257906	0.0257906	0.0300239	0.0794114	0.0992398	0.195667	0.0873946	0.0794114	0.0713583	0.0426138	0.463529	0.0632348	0.199162	0.338807	0.229943	0.046774
Downstream Signaling In Na√Øve CD8+ T Cells	25	69	304446	114.113	423	0.569004	3.15628e-14	7.023e-12	90.0709	PIK3CA (30.565 %) PRKCQ ( 1.060 %) BRAF ( 0.795 %) PRKCB ( 0.795 %) KRAS ( 0.618 %) STAT4 ( 0.618 %) JUN ( 0.530 %) IFNA2 ( 0.353 %) NFATC2 ( 0.353 %) B2M ( 0.265 %) CD3G ( 0.265 %) NFATC3 ( 0.265 %) NRAS ( 0.265 %) PRF1 ( 0.265 %) PRKCE ( 0.265 %) CD8A ( 0.177 %) ELK1 ( 0.177 %) EOMES ( 0.177 %) FASLG ( 0.177 %) HLA-A ( 0.177 %) IFNA14 ( 0.177 %) IFNA4 ( 0.177 %) IFNA6 ( 0.177 %) IFNG ( 0.177 %)…	0.0182133	0.0331374	0.00610833	0.00305884	0.00305884	0.00914849	0.00610833	0.00305884	0.0121793	0.0419827	0.00305884	0.0182133	0.00914849	0.00305884	0.00914849	0.00305884	0.0121793	0.00610833	0.00305884	0.00610833	0.00305884	0.00305884	0.0121793	0.0182133	0.0182133	0.0212164	0.0565454	0.0708868	0.142022	0.0623084	0.0565454	0.0507471	0.0301708	0.354729	0.0449131	0.144646	0.252511	0.167908	0.0331374
Inflammation Mediated By Chemokine And Cytokine Signaling Pathway	227	189	1133314	356.2	661	0.268508	3.16291e-14	7.023e-12	63.9939	PIK3CA (30.565 %) PTEN ( 3.092 %) AKT1 ( 2.739 %) COL6A3 ( 1.590 %) COL12A1 ( 1.502 %) MYH8 ( 1.502 %) ITPR1 ( 1.325 %) VWF ( 1.237 %) MYH14 ( 1.148 %) MYH6 ( 1.148 %) MYO3A ( 1.148 %) PREX1 ( 1.148 %) MYH11 ( 1.060 %) COL14A1 ( 0.972 %) MYH7 ( 0.972 %) ITPR3 ( 0.883 %) MYH1 ( 0.883 %) MYH10 ( 0.883 %) MYH4 ( 0.883 %) MYLK ( 0.883 %) ITPR2 ( 0.795 %) MYH2 ( 0.795 %) MYH9 ( 0.795 %) PLCB4 ( 0.795 …	0.0702821	0.125062	0.0239987	0.0120722	0.0120722	0.0357812	0.0239987	0.0120722	0.0474215	0.156369	0.0120722	0.0702821	0.0357812	0.0120722	0.0357812	0.0120722	0.0474215	0.0239987	0.0120722	0.0239987	0.0120722	0.0120722	0.0474215	0.0702821	0.0702821	0.0815059	0.206076	0.252855	0.455171	0.225129	0.206076	0.186555	0.114371	0.823923	0.166553	0.461749	0.684577	0.517484	0.125062
Integrins In Angiogenesis	275	66	566170	224.653	552	0.390428	3.18957e-14	7.023e-12	80.9783	PIK3CA (30.565 %) AKT1 ( 2.739 %) COL6A3 ( 1.590 %) COL6A6 ( 1.413 %) CASP8 ( 1.325 %) TLN1 ( 1.325 %) COL7A1 ( 1.237 %) COL6A5 ( 0.972 %) CDKN1B ( 0.883 %) PIK3R1 ( 0.883 %) COL4A2 ( 0.795 %) COL4A5 ( 0.795 %) COL4A6 ( 0.795 %) COL5A1 ( 0.795 %) COL1A2 ( 0.707 %) COL5A2 ( 0.707 %) COL4A4 ( 0.618 %) ROCK1 ( 0.618 %) COL1A1 ( 0.530 %) COL2A1 ( 0.530 %) ITGAV ( 0.530 %) ITGB3 ( 0.530 %) VAV3 ( 0.53…	0.0393882	0.071024	0.0133057	0.00667511	0.00667511	0.019892	0.0133057	0.00667511	0.0264343	0.0895032	0.00667511	0.0393882	0.019892	0.00667511	0.019892	0.00667511	0.0264343	0.0133057	0.00667511	0.0133057	0.00667511	0.00667511	0.0264343	0.0393882	0.0393882	0.0458004	0.119489	0.148486	0.284572	0.131204	0.119489	0.107615	0.0647813	0.616241	0.0955809	0.289348	0.470733	0.330919	0.071024
PI3K Cascade	99	36	200996	67.6426	391	0.761956	3.2074e-14	7.023e-12	91.5601	PIK3CA (30.565 %) PIK3R1 ( 0.883 %) KL ( 0.707 %) PIK3CB ( 0.707 %) FGFR2 ( 0.618 %) PIK3R4 ( 0.618 %) FGF6 ( 0.353 %) GAB1 ( 0.353 %) KLB ( 0.353 %) FGF23 ( 0.265 %) FGFR4 ( 0.265 %) IRS1 ( 0.265 %) PIK3C3 ( 0.265 %) FGF3 ( 0.177 %) FGF7 ( 0.177 %) FGF9 ( 0.177 %) GRB2 ( 0.177 %) PTPN11 ( 0.177 %) FGF1 ( 0.088 %) FGF10 ( 0.088 %) FGF18 ( 0.088 %) FGF8 ( 0.088 %) TLR9 ( 0.088 %)	0.0103872	0.0189607	0.00347445	0.00173874	0.00173874	0.00520714	0.00347445	0.00173874	0.00693682	0.0240691	0.00173874	0.0103872	0.00520714	0.00173874	0.00520714	0.00173874	0.00693682	0.00347445	0.00173874	0.00347445	0.00173874	0.00173874	0.00693682	0.0103872	0.0103872	0.0121078	0.0325241	0.0409058	0.0833343	0.0358855	0.0325241	0.0291509	0.0172519	0.220307	0.025766	0.0849282	0.152381	0.0991486	0.0189607
Oncogene Induced Senescence	211	30	213326	90.1658	404	0.65134	3.2496e-14	7.023e-12	91.8317	TP53 (32.155 %) UBC ( 0.795 %) AGO4 ( 0.707 %) TNRC6B ( 0.618 %) AGO1 ( 0.530 %) ETS2 ( 0.442 %) TNRC6C ( 0.442 %) E2F1 ( 0.353 %) TNRC6A ( 0.353 %) AGO3 ( 0.265 %) ETS1 ( 0.265 %) MOV10 ( 0.265 %) SP1 ( 0.265 %) TFDP1 ( 0.265 %) MAPK1 ( 0.177 %) MAPK3 ( 0.177 %) MDM2 ( 0.177 %) CDK4 ( 0.088 %) CDK6 ( 0.088 %) E2F3 ( 0.088 %) ERF ( 0.088 %) ID1 ( 0.088 %) UBA52 ( 0.088 %)	0.0141068	0.0257103	0.00472455	0.00236507	0.00236507	0.00707845	0.00472455	0.00236507	0.00942678	0.0326068	0.00236507	0.0141068	0.00707845	0.00236507	0.00707845	0.00236507	0.00942678	0.00472455	0.00236507	0.00472455	0.00236507	0.00236507	0.00942678	0.0141068	0.0141068	0.0164385	0.0439926	0.0552444	0.111654	0.0485093	0.0439926	0.0394544	0.0234006	0.287237	0.0348948	0.113755	0.201442	0.132442	0.0257103
Integrated Breast Cancer Pathway	71	90	641037	243.664	555	0.357502	3.28719e-14	7.023e-12	73.1532	TP53 (32.155 %) PTEN ( 3.092 %) AKT1 ( 2.739 %) ATM ( 2.032 %) NF1 ( 2.032 %) RB1 ( 2.032 %) ATR ( 1.590 %) BRCA1 ( 1.325 %) TPR ( 1.148 %) SMARCA4 ( 0.883 %) BRAF ( 0.795 %) EGFR ( 0.795 %) MYT1 ( 0.707 %) AR ( 0.618 %) SMAD4 ( 0.618 %) HDAC1 ( 0.530 %) BLM ( 0.442 %) BMPR2 ( 0.442 %) JAK1 ( 0.442 %) MSH2 ( 0.442 %) SMAD2 ( 0.442 %) TSC1 ( 0.442 %) WEE1 ( 0.442 %) ARAF ( 0.353 %) CDC25B ( 0.353 …	0.0434352	0.0781865	0.0146932	0.0073738	0.0073738	0.0219587	0.0146932	0.0073738	0.0291706	0.0984283	0.0073738	0.0434352	0.0219587	0.0073738	0.0219587	0.0073738	0.0291706	0.0146932	0.0073738	0.0146932	0.0073738	0.0073738	0.0291706	0.0434352	0.0434352	0.0504887	0.131182	0.162745	0.309304	0.143948	0.131182	0.118226	0.0713387	0.652976	0.105076	0.314398	0.504955	0.358578	0.0781865
Ras Pathway	115	69	457806	175.271	480	0.43753	3.29961e-14	7.023e-12	81.875	PIK3CA (30.565 %) MAP2K4 ( 3.445 %) AKT1 ( 2.739 %) BRAF ( 0.795 %) PIK3CB ( 0.707 %) KRAS ( 0.618 %) PIK3CG ( 0.618 %) SOS1 ( 0.618 %) JUN ( 0.530 %) MAP3K4 ( 0.530 %) PLD1 ( 0.530 %) STAT3 ( 0.530 %) SOS2 ( 0.442 %) TIAM1 ( 0.442 %) AKT3 ( 0.353 %) ARAF ( 0.353 %) EXOC2 ( 0.353 %) PAK2 ( 0.353 %) PIK3CD ( 0.353 %) PLD2 ( 0.353 %) RPS6KA2 ( 0.353 %) RPS6KA3 ( 0.353 %) RPS6KA6 ( 0.353 %) ETS1 ( 0…	0.029454	0.0533352	0.00991601	0.00497036	0.00497036	0.0148371	0.00991601	0.00497036	0.0197337	0.067381	0.00497036	0.029454	0.0148371	0.00497036	0.0148371	0.00497036	0.0197337	0.00991601	0.00497036	0.00991601	0.00497036	0.00497036	0.0197337	0.029454	0.029454	0.034278	0.090329	0.112712	0.220527	0.0993493	0.090329	0.0812183	0.0486065	0.5096	0.0720164	0.224401	0.377095	0.258415	0.0533352
VEGFA VEGFR2 Pathway	297	60	402060	153.967	439	0.455037	3.31678e-14	7.023e-12	89.0661	PIK3CA (30.565 %) PIK3R1 ( 0.883 %) PIK3CB ( 0.707 %) AXL ( 0.618 %) CYFIP2 ( 0.618 %) NCKAP1 ( 0.618 %) NCKAP1L ( 0.618 %) ROCK1 ( 0.618 %) ITGAV ( 0.530 %) ITGB3 ( 0.530 %) NCF2 ( 0.530 %) VAV3 ( 0.530 %) ROCK2 ( 0.442 %) ELMO2 ( 0.353 %) KDR ( 0.353 %) PAK2 ( 0.353 %) PTK2 ( 0.353 %) PTK2B ( 0.353 %) BCAR1 ( 0.265 %) ELMO1 ( 0.265 %) SH2D2A ( 0.265 %) VAV1 ( 0.265 %) WASF3 ( 0.265 %) ABI1 ( 0.…	0.0254107	0.0460923	0.008543	0.00428066	0.00428066	0.0127871	0.008543	0.00428066	0.017013	0.05829	0.00428066	0.0254107	0.0127871	0.00428066	0.0127871	0.00428066	0.017013	0.008543	0.00428066	0.008543	0.00428066	0.00428066	0.017013	0.0254107	0.0254107	0.0295826	0.0782739	0.0978337	0.193049	0.0861482	0.0782739	0.0703317	0.0419914	0.45852	0.0623211	0.196503	0.334712	0.226934	0.0460923
Meiotic Recombination	320	85	252206	98.746	180	0.260753	3.33512e-14	7.023e-12	87.2222	ATM (2.032 %) BRCA2 (1.678 %) TEX15 (1.502 %) BRCA1 (1.325 %) HIST1H3B (0.883 %) HIST1H2BC (0.530 %) BLM (0.442 %) MLH3 (0.442 %) RAD50 (0.442 %) RAD51C (0.442 %) HIST1H2BD (0.353 %) HIST1H3G (0.353 %) HIST2H2BE (0.353 %) SPO11 (0.353 %) HIST1H2AC (0.265 %) HIST1H2AJ (0.265 %) HIST1H2BH (0.265 %) HIST1H3C (0.265 %) HIST1H3D (0.265 %) HIST1H4L (0.265 %) MSH4 (0.265 %) MSH5 (0.265 %) RAD51 (0.265 %…	0.0155598	0.0283413	0.00521375	0.00261028	0.00261028	0.00781042	0.00521375	0.00261028	0.0104003	0.0359303	0.00261028	0.0155598	0.00781042	0.00261028	0.00781042	0.00261028	0.0104003	0.00521375	0.00261028	0.00521375	0.00261028	0.00261028	0.0104003	0.0155598	0.0155598	0.0181295	0.0484473	0.0608017	0.122506	0.0534085	0.0484473	0.0434601	0.0257983	0.311857	0.0384468	0.124796	0.219875	0.145144	0.0283413
Integrin Signalling Pathway	73	156	1189525	395.355	658	0.221239	3.41718e-14	7.12727e-12	62.462	PIK3CA (30.565 %) MAP2K4 ( 3.445 %) COL6A3 ( 1.590 %) COL12A1 ( 1.502 %) LAMA2 ( 1.325 %) TLN1 ( 1.325 %) FLNB ( 1.237 %) LAMA3 ( 1.148 %) LAMB4 ( 1.148 %) LAMA1 ( 1.060 %) LAMC1 ( 1.060 %) COL14A1 ( 0.972 %) COL5A3 ( 0.883 %) LAMA4 ( 0.883 %) LAMB1 ( 0.883 %) PIK3R1 ( 0.883 %) ACTN2 ( 0.795 %) BRAF ( 0.795 %) COL15A1 ( 0.795 %) COL4A2 ( 0.795 %) COL4A5 ( 0.795 %) COL4A6 ( 0.795 %) COL5A1 ( 0.795…	0.0809505	0.14338	0.0277462	0.0139707	0.0139707	0.0413293	0.0277462	0.0139707	0.0547226	0.178784	0.0139707	0.0809505	0.0413293	0.0139707	0.0413293	0.0139707	0.0547226	0.0277462	0.0139707	0.0277462	0.0139707	0.0139707	0.0547226	0.0809505	0.0809505	0.0937902	0.234568	0.286563	0.50513	0.255806	0.234568	0.212724	0.131243	0.866265	0.190257	0.512044	0.737256	0.570078	0.14338
IFN Gamma Pathway	195	43	300138	121.534	443	0.561705	3.61477e-14	7.46824e-12	89.1648	PIK3CA (30.565 %) AKT1 ( 2.739 %) MTOR ( 1.325 %) PIK3R1 ( 0.883 %) CREBBP ( 0.795 %) EP300 ( 0.707 %) DAPK1 ( 0.618 %) JAK2 ( 0.618 %) STAT3 ( 0.530 %) CBL ( 0.442 %) JAK1 ( 0.442 %) RAPGEF1 ( 0.442 %) CAMK2D ( 0.353 %) IRF9 ( 0.265 %) PIAS4 ( 0.265 %) PRKCD ( 0.265 %) CAMK2A ( 0.177 %) CASP1 ( 0.177 %) IFNG ( 0.177 %) MAPK1 ( 0.177 %) MAPK3 ( 0.177 %) PIAS1 ( 0.177 %) PTPN11 ( 0.177 %) PTPN2 ( …	0.0195185	0.0354925	0.00654895	0.00327985	0.00327985	0.00980732	0.00654895	0.00327985	0.013055	0.0449517	0.00327985	0.0195185	0.00980732	0.00327985	0.00980732	0.00327985	0.013055	0.00654895	0.00327985	0.00654895	0.00327985	0.00327985	0.013055	0.0195185	0.0195185	0.0227343	0.0605114	0.0758176	0.15148	0.0666641	0.0605114	0.0543182	0.0323186	0.374866	0.0480841	0.154263	0.26809	0.178903	0.0354925
Regulation Of Nuclear SMAD2/3 Signaling	235	82	546880	205.208	329	0.205002	3.65131e-14	7.47324e-12	79.0274	GATA3 (9.364 %) NCOR1 (3.534 %) AKT1 (2.739 %) RUNX1 (2.385 %) CBFB (1.943 %) LAMC1 (1.060 %) CREBBP (0.795 %) COL1A2 (0.707 %) EP300 (0.707 %) AR (0.618 %) SIN3B (0.618 %) SMAD4 (0.618 %) SP3 (0.618 %) HDAC1 (0.530 %) JUN (0.530 %) NCOA1 (0.530 %) RBL1 (0.530 %) HSPA8 (0.442 %) SIN3A (0.442 %) SMAD2 (0.442 %) E2F4 (0.353 %) FOXO4 (0.353 %) NR3C1 (0.353 %) ESR1 (0.265 %) HDAC2 (0.265 %) KAT2B (0.…	0.0353795	0.0639044	0.0119351	0.00598544	0.00598544	0.0178491	0.0119351	0.00598544	0.0237277	0.0806128	0.00598544	0.0353795	0.0178491	0.00598544	0.0178491	0.00598544	0.0237277	0.0119351	0.00598544	0.0119351	0.00598544	0.00598544	0.0237277	0.0353795	0.0353795	0.0411532	0.1078	0.134183	0.259309	0.118449	0.1078	0.097023	0.0582677	0.576198	0.0861158	0.263742	0.434659	0.302467	0.0639044
PIP3 Activates AKT Signaling	104	81	563668	200.034	541	0.432094	3.78087e-14	7.61341e-12	80.7763	PIK3CA (30.565 %) PTEN ( 3.092 %) AKT1 ( 2.739 %) ERBB2 ( 1.502 %) ERBB3 ( 1.325 %) MTOR ( 1.325 %) ERBB4 ( 1.060 %) PIK3R1 ( 0.883 %) EGFR ( 0.795 %) PDGFRA ( 0.795 %) AGO4 ( 0.707 %) KL ( 0.707 %) PIK3CB ( 0.707 %) RICTOR ( 0.707 %) FGFR2 ( 0.618 %) TNRC6B ( 0.618 %) AGO1 ( 0.530 %) AGO2 ( 0.530 %) CD19 ( 0.530 %) KIT ( 0.530 %) TNRC6C ( 0.442 %) AKT2 ( 0.353 %) AKT3 ( 0.353 %) FGF6 ( 0.353 %) …	0.0343344	0.0620441	0.0115783	0.00580602	0.00580602	0.0173171	0.0115783	0.00580602	0.0230226	0.0782868	0.00580602	0.0343344	0.0173171	0.00580602	0.0173171	0.00580602	0.0230226	0.0115783	0.00580602	0.0115783	0.00580602	0.00580602	0.0230226	0.0343344	0.0343344	0.0399411	0.104735	0.130425	0.252594	0.115101	0.104735	0.0942483	0.0565665	0.565118	0.0836383	0.256934	0.424882	0.294872	0.0620441
AKT(PKB) Bad Signaling ( EPO Signaling Pathway(JAK2 STAT1 STAT3 STAT5) )// AKT(PKB) Bad Signaling ( IL 7 Signaling(JAK1 JAK3 STAT5) )// Positive Regulation Of (Transcription Of SOCS By STAT Dimer) In JAK STAT Pathway ( JAK STAT Pathway And Regulation Pathway Diagram )// VEGF Signaling Pathway ( VEGF Signaling Pathway )	6	190	1270222	373.696	627	0.224749	3.78932e-14	7.61341e-12	68.1021	PIK3CA (30.565 %) MAP2K4 ( 3.445 %) AKT1 ( 2.739 %) MTOR ( 1.325 %) PRKCQ ( 1.060 %) PIK3R1 ( 0.883 %) BRAF ( 0.795 %) EGFR ( 0.795 %) PDGFRA ( 0.795 %) PRKCB ( 0.795 %) MAP3K13 ( 0.707 %) PIK3CB ( 0.707 %) ACVR1B ( 0.618 %) FGFR2 ( 0.618 %) JAK2 ( 0.618 %) MET ( 0.618 %) PLCG1 ( 0.618 %) PRKG2 ( 0.618 %) STAT4 ( 0.618 %) ALK ( 0.530 %) BTK ( 0.530 %) INSR ( 0.530 %) ITK ( 0.530 %) KIT ( 0.530 %)…	0.0749552	0.133108	0.0256367	0.0129016	0.0129016	0.0382075	0.0256367	0.0129016	0.0506161	0.16623	0.0129016	0.0749552	0.0382075	0.0129016	0.0382075	0.0129016	0.0506161	0.0256367	0.0129016	0.0256367	0.0129016	0.0129016	0.0506161	0.0749552	0.0749552	0.0868897	0.218644	0.267764	0.477576	0.238676	0.218644	0.198086	0.121777	0.843849	0.176987	0.484316	0.708765	0.541195	0.133108
Direct P53 Effectors	152	141	809720	269.77	537	0.298981	3.96444e-14	7.89284e-12	72.4395	TP53 (32.155 %) PTEN ( 3.092 %) RB1 ( 2.032 %) FOXA1 ( 1.237 %) PRDM1 ( 0.972 %) SMARCA4 ( 0.883 %) VCAN ( 0.883 %) CREBBP ( 0.795 %) EGFR ( 0.795 %) TRRAP ( 0.795 %) APC ( 0.707 %) EP300 ( 0.707 %) NLRC4 ( 0.707 %) COL18A1 ( 0.618 %) MET ( 0.618 %) APAF1 ( 0.530 %) DROSHA ( 0.530 %) JUN ( 0.530 %) TYRP1 ( 0.530 %) HGF ( 0.442 %) MSH2 ( 0.442 %) TP53BP2 ( 0.442 %) CSE1L ( 0.353 %) DDX5 ( 0.353 %)…	0.0492075	0.088359	0.0166792	0.00837465	0.00837465	0.0249141	0.0166792	0.00837465	0.0330801	0.111072	0.00837465	0.0492075	0.0249141	0.00837465	0.0249141	0.00837465	0.0330801	0.0166792	0.00837465	0.0166792	0.00837465	0.00837465	0.0330801	0.0492075	0.0492075	0.0571701	0.147676	0.182773	0.343279	0.161892	0.147676	0.133219	0.0806599	0.699593	0.118516	0.348779	0.550195	0.39625	0.088359
ErbB1 Downstream Signaling	34	105	714254	240.206	517	0.332907	4.05721e-14	8.00477e-12	79.3037	PIK3CA (30.565 %) MAP2K4 ( 3.445 %) AKT1 ( 2.739 %) MTOR ( 1.325 %) PIK3R1 ( 0.883 %) BRAF ( 0.795 %) EGFR ( 0.795 %) PIK3CB ( 0.707 %) RICTOR ( 0.707 %) CYFIP2 ( 0.618 %) KRAS ( 0.618 %) NCKAP1 ( 0.618 %) SOS1 ( 0.618 %) EPS8 ( 0.530 %) JUN ( 0.530 %) PLD1 ( 0.530 %) PRKCZ ( 0.530 %) STAT3 ( 0.530 %) CHN2 ( 0.442 %) DIAPH3 ( 0.442 %) IQGAP1 ( 0.442 %) GAB1 ( 0.353 %) PLD2 ( 0.353 %) RPS6KA3 ( 0.…	0.0426895	0.0768686	0.0144373	0.00724487	0.00724487	0.0215775	0.0144373	0.00724487	0.0286661	0.0967875	0.00724487	0.0426895	0.0215775	0.00724487	0.0215775	0.00724487	0.0286661	0.0144373	0.00724487	0.0144373	0.00724487	0.00724487	0.0286661	0.0426895	0.0426895	0.0496251	0.129035	0.160131	0.304805	0.141609	0.129035	0.116277	0.0701318	0.64647	0.103331	0.309841	0.498809	0.35356	0.0768686
Meiotic Synapsis	321	76	311144	120.66	217	0.254896	4.29177e-14	8.39193e-12	84.3318	SYNE1 (4.240 %) SYNE2 (2.739 %) ATR (1.590 %) BRCA1 (1.325 %) DIDO1 (1.148 %) SYCP2 (1.148 %) STAG2 (0.972 %) STAG1 (0.795 %) HIST1H2BC (0.530 %) SMC1A (0.530 %) SMC1B (0.530 %) HIST1H2BD (0.353 %) HIST2H2BE (0.353 %) RAD21 (0.353 %) REC8 (0.353 %) SMC3 (0.353 %) TERF2 (0.353 %) HIST1H2AC (0.265 %) HIST1H2AJ (0.265 %) HIST1H2BH (0.265 %) HIST1H4L (0.265 %) HSPA2 (0.265 %) POT1 (0.265 %) STAG3 (0.…	0.0193639	0.0352137	0.00649674	0.00325366	0.00325366	0.00972926	0.00649674	0.00325366	0.0129513	0.0446003	0.00325366	0.0193639	0.00972926	0.00325366	0.00972926	0.00325366	0.0129513	0.00649674	0.00325366	0.00649674	0.00325366	0.00325366	0.0129513	0.0193639	0.0193639	0.0225545	0.0600423	0.0752346	0.150365	0.0661489	0.0600423	0.0538957	0.0320643	0.372513	0.0477089	0.153129	0.266261	0.177608	0.0352137
G Alpha (12/13) Signalling Events	251	75	583526	215.105	471	0.34037	4.62718e-14	8.96772e-12	84.2887	PIK3CA (30.565 %) OBSCN ( 1.855 %) KALRN ( 0.883 %) PIK3R1 ( 0.883 %) TRIO ( 0.883 %) AKAP13 ( 0.795 %) ARHGEF11 ( 0.618 %) PLEKHG2 ( 0.618 %) ROCK1 ( 0.618 %) SOS1 ( 0.618 %) ARHGEF1 ( 0.530 %) ARHGEF4 ( 0.530 %) ARHGEF9 ( 0.530 %) VAV3 ( 0.530 %) MCF2L ( 0.442 %) ROCK2 ( 0.442 %) SOS2 ( 0.442 %) TIAM1 ( 0.442 %) ARHGEF6 ( 0.353 %) ECT2 ( 0.353 %) FGD1 ( 0.353 %) MCF2 ( 0.353 %) RASGRF2 ( 0.353 …	0.0374038	0.0675027	0.0126267	0.0063334	0.0063334	0.0188801	0.0126267	0.0063334	0.0250939	0.0851083	0.0063334	0.0374038	0.0188801	0.0063334	0.0188801	0.0063334	0.0250939	0.0126267	0.0063334	0.0126267	0.0063334	0.0063334	0.0250939	0.0374038	0.0374038	0.0435003	0.113716	0.141428	0.272162	0.124906	0.113716	0.102382	0.0615591	0.596894	0.0909027	0.276772	0.453153	0.316967	0.0675027
AUF1 (hnRNP D0) Binds And Destabilizes MRNA// Autodegradation Of The E3 Ubiquitin Ligase COP1// CDK Mediated Phosphorylation And Removal Of Cdc6// CDT1 Association With The CDC6:ORC:origin Complex// Cross Presentation Of Soluble Exogenous Antigens (endosomes)// Dectin 1 Mediated Noncanonical NF KB Signaling// Degradation Of AXIN// Degradation Of DVL// Degradation Of GLI1 By The Proteasome// Degra…	145	162	849029	253.87	524	0.314719	4.71799e-14	9.06351e-12	76.9084	TP53 (32.155 %) ATM ( 2.032 %) RB1 ( 2.032 %) HECW1 ( 1.502 %) CDKN1B ( 0.883 %) GLI3 ( 0.883 %) UBC ( 0.795 %) GTSE1 ( 0.707 %) GLI1 ( 0.530 %) CCNA2 ( 0.442 %) CD4 ( 0.442 %) GLI2 ( 0.442 %) HSPA8 ( 0.442 %) ITCH ( 0.442 %) KLHL12 ( 0.442 %) PSMD1 ( 0.442 %) HHAT ( 0.353 %) MCM7 ( 0.353 %) MRC2 ( 0.353 %) ORC2 ( 0.353 %) PABPC1 ( 0.353 %) PAK2 ( 0.353 %) PSMA3 ( 0.353 %) PSMD2 ( 0.353 %) PSMD4 …	0.0456617	0.0821163	0.0154583	0.00775925	0.00775925	0.0230976	0.0154583	0.00775925	0.0306776	0.103317	0.00775925	0.0456617	0.0230976	0.00775925	0.0230976	0.00775925	0.0306776	0.0154583	0.00775925	0.0154583	0.00775925	0.00775925	0.0306776	0.0456617	0.0456617	0.0530666	0.137569	0.170513	0.322588	0.150901	0.137569	0.124028	0.0749385	0.671724	0.110275	0.327844	0.522888	0.373352	0.0821163
AKT(PKB) MTOR Signaling ( Insulin Receptor Signaling (Mammal) )// AKT(PKB) TOR Signaling ( Insulin Receptor Signaling (D. Melanogaster) )	7	15	129227	57.3987	116	0.305556	3.97858e-13	7.57659e-11	96.5517	PTEN (3.092 %) AKT1 (2.739 %) MTOR (1.325 %) EIF4A2 (0.618 %) EIF4G3 (0.442 %) AKT2 (0.353 %) AKT3 (0.353 %) EIF4A1 (0.353 %) RPS6KB1 (0.353 %) TSC2 (0.353 %) EIF4G1 (0.265 %) RHEB (0.265 %) RPS6 (0.088 %)	0.0087398	0.0159646	0.00292179	0.00146197	0.00146197	0.00437949	0.00292179	0.00146197	0.00583505	0.0202742	0.00146197	0.0087398	0.00437949	0.00146197	0.00437949	0.00146197	0.00583505	0.00292179	0.00146197	0.00292179	0.00146197	0.00146197	0.00583505	0.0087398	0.0087398	0.010189	0.0274149	0.0345036	0.0705403	0.0302566	0.0274149	0.0245649	0.0145239	0.188778	0.0217065	0.0718991	0.129762	0.0840396	0.0159646
Packaging Of Telomere Ends	213	50	77184	22.2186	62	0.445675	9.09119e-13	1.71635e-10	96.7742	HIST1H2BC (0.530 %) HIST1H2BD (0.353 %) HIST2H2BE (0.353 %) TERF2 (0.353 %) HIST1H2AC (0.265 %) HIST1H2AJ (0.265 %) HIST1H2BH (0.265 %) HIST1H4L (0.265 %) POT1 (0.265 %) ACD (0.177 %) H2AFZ (0.177 %) HIST1H2AE (0.177 %) HIST1H2BB (0.177 %) HIST1H2BE (0.177 %) HIST1H2BF (0.177 %) HIST1H2BG (0.177 %) HIST1H2BJ (0.177 %) HIST1H2BK (0.177 %) HIST1H4E (0.177 %) TERF2IP (0.177 %) H2AFX (0.088 %) HIST1H…	0.00328645	0.0060169	0.00109668	0.000548493	0.000548493	0.00164458	0.00109668	0.000548493	0.00219217	0.00765158	0.000548493	0.00328645	0.00164458	0.000548493	0.00164458	0.000548493	0.00219217	0.00109668	0.000548493	0.00109668	0.000548493	0.000548493	0.00219217	0.00328645	0.00328645	0.00383314	0.0103701	0.0130811	0.0270593	0.0114554	0.0103701	0.00928357	0.00547141	0.0754572	0.00819588	0.027593	0.0507861	0.0323827	0.0060169
HDACs Deacetylate Histones	252	94	308405	120.089	195	0.210531	1.44529e-12	2.70529e-10	87.1795	NCOR1 (3.534 %) CHD4 (1.325 %) ARID4B (0.883 %) HIST1H3B (0.883 %) CHD3 (0.618 %) GPS2 (0.618 %) NCOR2 (0.618 %) TBL1XR1 (0.618 %) HDAC1 (0.530 %) HIST1H2BC (0.530 %) HDAC8 (0.353 %) HIST1H2AI (0.353 %) HIST1H2AK (0.353 %) HIST1H2BD (0.353 %) HIST1H3G (0.353 %) HIST2H2BE (0.353 %) TBL1X (0.353 %) ARID4A (0.265 %) HDAC2 (0.265 %) HIST1H2AC (0.265 %) HIST1H2AJ (0.265 %) HIST1H2BH (0.265 %) HIST1H3C…	0.019263	0.0350318	0.00646269	0.00323658	0.00323658	0.00967836	0.00646269	0.00323658	0.0128836	0.0443711	0.00323658	0.019263	0.00967836	0.00323658	0.00967836	0.00323658	0.0128836	0.00646269	0.00323658	0.00646269	0.00323658	0.00323658	0.0128836	0.019263	0.019263	0.0224373	0.0597362	0.0748543	0.149637	0.0658129	0.0597362	0.0536201	0.0318985	0.370974	0.0474641	0.152389	0.265066	0.176762	0.0350318
Hypoxia Response Via HIF Activation	273	16	123081	55.1811	111	0.303533	1.74925e-12	3.2465e-10	97.2973	PTEN (3.092 %) AKT1 (2.739 %) MTOR (1.325 %) CREBBP (0.795 %) AKT2 (0.353 %) AKT3 (0.353 %) ARNT (0.265 %) GPR37 (0.265 %) HIF1A (0.265 %) PARK2 (0.265 %) EGLN2 (0.177 %) EGLN1 (0.088 %) TXN (0.088 %)	0.00838675	0.015322	0.00280344	0.0014027	0.0014027	0.00420221	0.00280344	0.0014027	0.00559901	0.0194598	0.0014027	0.00838675	0.00420221	0.0014027	0.00420221	0.0014027	0.00559901	0.00280344	0.0014027	0.00280344	0.0014027	0.0014027	0.00559901	0.00838675	0.00838675	0.00977769	0.0263175	0.0331273	0.067778	0.0290472	0.0263175	0.0235802	0.0139388	0.181864	0.0208352	0.0690857	0.124841	0.0807721	0.015322
Negative Regulation Of The PI3K/AKT Network	88	8	77068	37.2376	84	0.353298	4.93471e-12	9.08153e-10	97.619	PTEN (3.092 %) AKT1 (2.739 %) PHLPP1 (0.530 %) PHLPP2 (0.442 %) AKT2 (0.353 %) AKT3 (0.353 %) TRIB3 (0.088 %)	0.00557647	0.0101998	0.00186229	0.000931578	0.000931578	0.00279213	0.00186229	0.000931578	0.00372111	0.0129634	0.000931578	0.00557647	0.00279213	0.000931578	0.00279213	0.000931578	0.00372111	0.00186229	0.000931578	0.00186229	0.000931578	0.000931578	0.00372111	0.00557647	0.00557647	0.00650285	0.0175524	0.02212	0.0455315	0.019382	0.0175524	0.0157194	0.00927683	0.124778	0.0138829	0.0464206	0.0847346	0.0543859	0.0101998
Wnt Signaling Pathway	302	250	1698044	483.916	584	0.0816425	1.89838e-11	3.46454e-09	56.3356	CDH1 (6.095 %) FAT3 (2.827 %) ARID1A (2.297 %) PCDH19 (1.413 %) ITPR1 (1.325 %) PCDH15 (1.325 %) SRCAP (1.237 %) FAT1 (1.060 %) PRKCQ (1.060 %) DCHS1 (0.972 %) FAT2 (0.972 %) CDH9 (0.883 %) ITPR3 (0.883 %) PCDHA5 (0.883 %) SMARCA4 (0.883 %) CDH12 (0.795 %) CDH8 (0.795 %) CELSR1 (0.795 %) CELSR2 (0.795 %) CELSR3 (0.795 %) CREBBP (0.795 %) ITPR2 (0.795 %) PCDHA1 (0.795 %) PCDHA9 (0.795 %) PCDHB7 (0…	0.108183	0.18934	0.0374457	0.0189015	0.0189015	0.0556395	0.0374457	0.0189015	0.0734893	0.234445	0.0189015	0.108183	0.0556395	0.0189015	0.0556395	0.0189015	0.0734893	0.0374457	0.0189015	0.0374457	0.0189015	0.0189015	0.0734893	0.108183	0.108183	0.12504	0.304112	0.367439	0.614849	0.33017	0.304112	0.27704	0.173722	0.934701	0.248915	0.622129	0.836808	0.681759	0.18934
Degradation Of The Extracellular Matrix	244	72	425700	163.986	236	0.158105	6.1966e-10	1.12153e-07	85.5932	CDH1 (6.095 %) LAMA3 (1.148 %) LAMC1 (1.060 %) HSPG2 (0.972 %) LAMB1 (0.883 %) NID1 (0.883 %) ADAMTS9 (0.795 %) LAMA5 (0.707 %) A2M (0.530 %) ADAMTS5 (0.530 %) LAMB3 (0.530 %) TLL2 (0.530 %) ACAN (0.442 %) PLG (0.442 %) ADAMTS16 (0.353 %) ADAMTS18 (0.353 %) BCAN (0.353 %) CAPN1 (0.353 %) CAPN11 (0.353 %) CAPN7 (0.353 %) LAMC2 (0.353 %) ADAMTS1 (0.265 %) BMP1 (0.265 %) CAPN13 (0.265 %) CAPN2 (0.26…	0.0272947	0.0494704	0.0091823	0.00460174	0.00460174	0.0137418	0.0091823	0.00460174	0.0182803	0.0625323	0.00460174	0.0272947	0.0137418	0.00460174	0.0137418	0.00460174	0.0182803	0.0091823	0.00460174	0.0091823	0.00460174	0.00460174	0.0182803	0.0272947	0.0272947	0.0317709	0.0839046	0.10479	0.205957	0.0923165	0.0839046	0.0754148	0.0450761	0.482925	0.0668463	0.209611	0.354786	0.241749	0.0494704
MAP3K8 (TPL2) Dependent MAPK1/3 Activation	79	16	84177	29.6872	66	0.346975	2.05004e-09	3.68e-07	98.4848	MAP2K4 (3.445 %) UBC (0.795 %) IKBKB (0.353 %) NFKB1 (0.353 %) CUL1 (0.265 %) BTRC (0.177 %) CHUK (0.177 %) MAP2K1 (0.088 %) MAP3K8 (0.088 %) TNIP2 (0.088 %) UBA52 (0.088 %)	0.00441821	0.00808514	0.00147491	0.000737728	0.000737728	0.00221155	0.00147491	0.000737728	0.00294765	0.0102788	0.000737728	0.00441821	0.00221155	0.000737728	0.00221155	0.000737728	0.00294765	0.00147491	0.000737728	0.00147491	0.000737728	0.000737728	0.00294765	0.00441821	0.00441821	0.00515268	0.0139242	0.0175561	0.0362275	0.0153785	0.0139242	0.0124676	0.00735284	0.100156	0.011009	0.0369385	0.0677088	0.043314	0.00808514
MTOR Signalling	84	16	81517	28.7881	62	0.333179	2.05645e-08	3.66149e-06	98.3871	AKT1 (2.739 %) MTOR (1.325 %) RPTOR (0.442 %) LAMTOR2 (0.265 %) RHEB (0.265 %) RRAGB (0.177 %) RRAGD (0.177 %) LAMTOR5 (0.088 %) YWHAB (0.088 %)	0.00428124	0.00783493	0.00142912	0.000714816	0.000714816	0.00214291	0.00142912	0.000714816	0.0028562	0.00996105	0.000714816	0.00428124	0.00214291	0.000714816	0.00214291	0.000714816	0.0028562	0.00142912	0.000714816	0.00142912	0.000714816	0.000714816	0.0028562	0.00428124	0.00428124	0.00499299	0.0134945	0.0170153	0.035122	0.0149043	0.0134945	0.0120826	0.00712521	0.0972009	0.0106687	0.0358117	0.0656758	0.0419969	0.00783493
FAS Signaling Pathway	339	37	261087	102.329	157	0.185902	2.16511e-08	3.82386e-06	88.535	MAP2K4 (3.445 %) ERBB2 (1.502 %) CASP8 (1.325 %) ERBB3 (1.325 %) ERBB4 (1.060 %) GLI3 (0.883 %) EGFR (0.795 %) APAF1 (0.530 %) GLI1 (0.530 %) JUN (0.530 %) PARP4 (0.530 %) DFFB (0.265 %) FAF1 (0.265 %) GSN (0.265 %) PARP1 (0.265 %) CASP6 (0.177 %) CASP7 (0.177 %) DAXX (0.177 %) FASLG (0.177 %) LMNA (0.177 %) LMNB1 (0.177 %) MAPK10 (0.177 %) MAPK8 (0.177 %) PARP3 (0.177 %) CAPG (0.088 %) CASP10 (0…	0.0161726	0.0294498	0.00542019	0.00271378	0.00271378	0.00811926	0.00542019	0.00271378	0.010811	0.0373299	0.00271378	0.0161726	0.00811926	0.00271378	0.00811926	0.00271378	0.010811	0.00542019	0.00271378	0.00542019	0.00271378	0.00271378	0.010811	0.0161726	0.0161726	0.0188425	0.0503216	0.0631379	0.127047	0.055469	0.0503216	0.0451461	0.0268087	0.321993	0.0399424	0.129416	0.227528	0.15045	0.0294498
Cyclin A:Cdk2 Associated Events At S Phase Entry	24	15	63035	26.7826	58	0.335576	5.02701e-08	8.80732e-06	96.5517	RB1 (2.032 %) CDKN1B (0.883 %) CCNA2 (0.442 %) WEE1 (0.442 %) CDC25B (0.353 %) CCNH (0.265 %) CDK2 (0.177 %) CDK7 (0.177 %) MNAT1 (0.177 %) MYC (0.177 %) CDC25A (0.088 %) MAX (0.088 %)	0.00397642	0.00727802	0.00132723	0.000663837	0.000663837	0.00199019	0.00132723	0.000663837	0.00265271	0.00925373	0.000663837	0.00397642	0.00199019	0.000663837	0.00199019	0.000663837	0.00265271	0.00132723	0.000663837	0.00132723	0.000663837	0.000663837	0.00265271	0.00397642	0.00397642	0.00463762	0.0125378	0.0158111	0.0326577	0.0138484	0.0125378	0.0112255	0.00661858	0.0905909	0.00991142	0.0332999	0.0611368	0.0390602	0.00727802
Senescence Associated Secretory Phenotype (SASP)	218	108	348601	99.2898	144	0.161458	2.45263e-06	0.000426291	87.5	CDKN1B (0.883 %) HIST1H3B (0.883 %) UBC (0.795 %) ANAPC5 (0.530 %) HIST1H2BC (0.530 %) JUN (0.530 %) STAT3 (0.530 %) CCNA2 (0.442 %) EHMT1 (0.442 %) ANAPC1 (0.353 %) ANAPC7 (0.353 %) HIST1H2BD (0.353 %) HIST1H3G (0.353 %) HIST2H2BE (0.353 %) NFKB1 (0.353 %) RPS6KA2 (0.353 %) RPS6KA3 (0.353 %) ANAPC4 (0.265 %) HIST1H2AC (0.265 %) HIST1H2AJ (0.265 %) HIST1H2BH (0.265 %) HIST1H3C (0.265 %) HIST1H3D …	0.0156526	0.0285092	0.00524501	0.00262595	0.00262595	0.00785718	0.00524501	0.00262595	0.0104625	0.0361423	0.00262595	0.0156526	0.00785718	0.00262595	0.00785718	0.00262595	0.0104625	0.00524501	0.00262595	0.00524501	0.00262595	0.00262595	0.0104625	0.0156526	0.0156526	0.0182375	0.0487313	0.0611558	0.123195	0.0537207	0.0487313	0.0437156	0.0259514	0.313401	0.0386734	0.125497	0.221038	0.145949	0.0285092
E2F Transcription Factor Network	312	77	428582	153.918	206	0.126577	2.89338e-06	0.000498938	83.9806	ATM (2.032 %) RB1 (2.032 %) BRCA1 (1.325 %) CDKN1B (0.883 %) CREBBP (0.795 %) TRRAP (0.795 %) EP300 (0.707 %) SMARCA2 (0.707 %) TOPBP1 (0.618 %) APAF1 (0.530 %) HDAC1 (0.530 %) POLA1 (0.530 %) RBL1 (0.530 %) CCNA2 (0.442 %) CES5A (0.353 %) E2F1 (0.353 %) E2F4 (0.353 %) E2F8 (0.353 %) RRM2 (0.353 %) TFDP2 (0.353 %) CES1 (0.265 %) KAT2B (0.265 %) PRMT5 (0.265 %) RBBP8 (0.265 %) RBL2 (0.265 %) RRM1 …	0.0254016	0.046076	0.00853992	0.00427912	0.00427912	0.0127825	0.00853992	0.00427912	0.0170069	0.0582695	0.00427912	0.0254016	0.0127825	0.00427912	0.0127825	0.00427912	0.0170069	0.00853992	0.00427912	0.00853992	0.00427912	0.00427912	0.0170069	0.0254016	0.0254016	0.029572	0.0782467	0.0978001	0.192987	0.0861184	0.0782467	0.0703072	0.0419765	0.4584	0.0622993	0.19644	0.334614	0.226862	0.046076
Leucine Stimulation On Insulin Signaling	366	15	114232	44.1039	76	0.236336	3.30638e-06	0.000565207	94.7368	AKT1 (2.74 %) MTOR (1.33 %) PIK3CG (0.62 %) INSR (0.53 %) TSC1 (0.44 %) RPS6KB1 (0.35 %) TSC2 (0.35 %) IRS1 (0.27 %) RHEB (0.27 %) SLC7A5 (0.18 %)	0.0066422	0.0121436	0.00221899	0.00111011	0.00111011	0.00332663	0.00221899	0.00111011	0.00443305	0.0154299	0.00111011	0.0066422	0.00332663	0.00111011	0.00332663	0.00111011	0.00443305	0.00221899	0.00111011	0.00221899	0.00111011	0.00111011	0.00443305	0.0066422	0.0066422	0.00774493	0.0208827	0.0263052	0.0540223	0.0230553	0.0208827	0.0187052	0.0110458	0.146862	0.0165229	0.0550724	0.100143	0.0644714	0.0121436
Presynaptic Phase Of Homologous DNA Pairing And Strand Exchange	325	39	234446	98.9969	143	0.159714	3.3293e-06	0.000565207	91.6084	ATM (2.032 %) BRCA2 (1.678 %) ATR (1.590 %) BRCA1 (1.325 %) BRIP1 (0.883 %) TOPBP1 (0.618 %) BLM (0.442 %) RAD50 (0.442 %) RAD51C (0.442 %) DNA2 (0.353 %) RFC4 (0.353 %) BARD1 (0.265 %) EXO1 (0.265 %) RAD51 (0.265 %) RBBP8 (0.265 %) RFC5 (0.265 %) RMI1 (0.265 %) TOP3A (0.265 %) XRCC2 (0.265 %) HUS1 (0.177 %) RAD17 (0.177 %) RAD51D (0.177 %) RPA3 (0.177 %) WRN (0.177 %) NBN (0.088 %) RAD1 (0.088 %…	0.0156026	0.0284187	0.00522817	0.00261751	0.00261751	0.00783199	0.00522817	0.00261751	0.010429	0.0360281	0.00261751	0.0156026	0.00783199	0.00261751	0.00783199	0.00261751	0.010429	0.00522817	0.00261751	0.00522817	0.00261751	0.00261751	0.010429	0.0156026	0.0156026	0.0181793	0.0485783	0.060965	0.122823	0.0535525	0.0485783	0.0435779	0.0258689	0.312569	0.0385513	0.125119	0.220412	0.145515	0.0284187
Posttranslational Regulation Of Adherens Junction Stability And Dissassembly	259	50	360746	133.811	182	0.133579	5.1116e-06	0.000861108	92.8571	CDH1 (6.095 %) DSP (1.325 %) CREBBP (0.795 %) EGFR (0.795 %) ROBO1 (0.795 %) MET (0.618 %) NTRK2 (0.618 %) ABL1 (0.530 %) CDH2 (0.442 %) IQGAP1 (0.442 %) TIAM1 (0.442 %) ZBTB33 (0.442 %) BDNF (0.353 %) CTNNA1 (0.353 %) HGS (0.353 %) IGF1R (0.353 %) SLIT1 (0.353 %) EGF (0.265 %) CTNNB1 (0.177 %) DNM2 (0.177 %) FER (0.177 %) GNA13 (0.177 %) MMP3 (0.177 %) RET (0.177 %) RIN2 (0.177 %) SNX1 (0.177 %)…	0.0217125	0.0394456	0.00729051	0.00365192	0.00365192	0.0109158	0.00729051	0.00365192	0.0145279	0.0499309	0.00365192	0.0217125	0.0109158	0.00365192	0.0109158	0.00365192	0.0145279	0.00729051	0.00365192	0.00729051	0.00365192	0.00365192	0.0145279	0.0217125	0.0217125	0.0252851	0.0671525	0.084062	0.167174	0.0739535	0.0671525	0.0603016	0.0359249	0.407368	0.0534004	0.170215	0.293596	0.197093	0.0394456
HDR Through Homologous Recombination (HRR)	316	46	263977	110.346	152	0.139088	2.0137e-05	0.00336642	92.1053	ATM (2.032 %) BRCA2 (1.678 %) BRCA1 (1.325 %) POLE (1.148 %) BRIP1 (0.883 %) UBC (0.795 %) BLM (0.442 %) RAD50 (0.442 %) RAD51C (0.442 %) DNA2 (0.353 %) POLD1 (0.353 %) RFC1 (0.353 %) RFC4 (0.353 %) BARD1 (0.265 %) EXO1 (0.265 %) RAD51 (0.265 %) RAD51AP1 (0.265 %) RBBP8 (0.265 %) RFC5 (0.265 %) RMI1 (0.265 %) TOP3A (0.265 %) XRCC2 (0.265 %) POLD2 (0.177 %) POLH (0.177 %) RAD51D (0.177 %) RPA3 (0.…	0.0175566	0.0319514	0.00588679	0.00294774	0.00294774	0.00881717	0.00588679	0.00294774	0.0117389	0.0404869	0.00294774	0.0175566	0.00881717	0.00294774	0.00881717	0.00294774	0.0117389	0.00588679	0.00294774	0.00588679	0.00294774	0.00294774	0.0117389	0.0175566	0.0175566	0.0204526	0.0545457	0.0683985	0.137228	0.0601114	0.0545457	0.0489471	0.0290894	0.344364	0.0433153	0.139771	0.244555	0.162325	0.0319514
Signaling By PDGF	293	27	189830	86.1705	124	0.158063	2.04778e-05	0.00339746	94.3548	COL6A3 (1.590 %) COL6A6 (1.413 %) COL6A5 (0.972 %) COL4A2 (0.795 %) COL4A5 (0.795 %) PDGFRA (0.795 %) COL4A4 (0.618 %) COL9A1 (0.530 %) COL4A1 (0.442 %) PLG (0.442 %) COL6A2 (0.353 %) COL9A3 (0.353 %) THBS1 (0.353 %) THBS3 (0.353 %) THBS4 (0.353 %) PDGFRB (0.265 %) PLAT (0.265 %) SPP1 (0.265 %) COL4A3 (0.177 %) PDGFB (0.177 %) COL6A1 (0.088 %) COL9A2 (0.088 %) FURIN (0.088 %) THBS2 (0.088 %)	0.0134371	0.0244966	0.00449923	0.00225215	0.00225215	0.00674125	0.00449923	0.00225215	0.00897822	0.0310727	0.00225215	0.0134371	0.00674125	0.00225215	0.00674125	0.00225215	0.00897822	0.00449923	0.00225215	0.00449923	0.00225215	0.00225215	0.00897822	0.0134371	0.0134371	0.0156589	0.0419345	0.0526746	0.106612	0.0462451	0.0419345	0.0376045	0.0222946	0.275607	0.0332549	0.108624	0.19281	0.12653	0.0244966
HDR Through Single Strand Annealing (SSA)	317	37	210415	89.295	124	0.142595	9.78263e-05	0.0161082	91.9355	ATM (2.032 %) ATR (1.590 %) BRCA1 (1.325 %) BRIP1 (0.883 %) TOPBP1 (0.618 %) ABL1 (0.530 %) BLM (0.442 %) RAD50 (0.442 %) DNA2 (0.353 %) RFC4 (0.353 %) BARD1 (0.265 %) EXO1 (0.265 %) RAD51 (0.265 %) RBBP8 (0.265 %) RFC5 (0.265 %) RMI1 (0.265 %) TOP3A (0.265 %) ERCC4 (0.177 %) HUS1 (0.177 %) RAD17 (0.177 %) RPA3 (0.177 %) WRN (0.177 %) ERCC1 (0.088 %) NBN (0.088 %) RAD1 (0.088 %) RAD9A (0.088 %) R…	0.0139605	0.0254452	0.00467531	0.00234039	0.00234039	0.00700476	0.00467531	0.00234039	0.00932876	0.0322717	0.00234039	0.0139605	0.00700476	0.00234039	0.00700476	0.00234039	0.00932876	0.00467531	0.00234039	0.00467531	0.00234039	0.00234039	0.00932876	0.0139605	0.0139605	0.0162682	0.0435432	0.0546833	0.110554	0.0480149	0.0435432	0.0390504	0.023159	0.284711	0.0345366	0.112636	0.199563	0.131153	0.0254452
ATF 2 Transcription Factor Network	304	59	352678	119.061	157	0.120132	0.000132584	0.0216685	87.2611	NF1 (2.032 %) RB1 (2.032 %) CBFB (1.943 %) BRCA1 (1.325 %) PDGFRA (0.795 %) EP300 (0.707 %) COL24A1 (0.618 %) PPARGC1A (0.618 %) JUN (0.530 %) CCNA2 (0.442 %) NOS2 (0.353 %) POU2F1 (0.353 %) DUSP10 (0.265 %) ESR1 (0.265 %) MMP2 (0.265 %) ARG1 (0.177 %) ATF2 (0.177 %) CREB1 (0.177 %) CUL3 (0.177 %) IFNG (0.177 %) MAPK1 (0.177 %) MAPK14 (0.177 %) MAPK3 (0.177 %) MAPK8 (0.177 %) PLAU (0.177 %) PRKCA…	0.0190816	0.0347045	0.00640143	0.00320585	0.00320585	0.00958677	0.00640143	0.00320585	0.0127619	0.0439586	0.00320585	0.0190816	0.00958677	0.00320585	0.00958677	0.00320585	0.0127619	0.00640143	0.00320585	0.00640143	0.00320585	0.00320585	0.0127619	0.0190816	0.0190816	0.0222263	0.0591853	0.0741695	0.148325	0.0652079	0.0591853	0.0531239	0.0316	0.368194	0.0470235	0.151055	0.26291	0.175238	0.0347045
Homologous DNA Pairing And Strand Exchange// Resolution Of D Loop Structures Through Synthesis Dependent Strand Annealing (SDSA)	318	26	177440	77.0058	109	0.150903	0.000134011	0.0217396	92.6606	ATM (2.032 %) BRCA2 (1.678 %) BRCA1 (1.325 %) BRIP1 (0.883 %) BLM (0.442 %) RAD50 (0.442 %) RAD51C (0.442 %) DNA2 (0.353 %) BARD1 (0.265 %) EXO1 (0.265 %) RAD51 (0.265 %) RAD51AP1 (0.265 %) RBBP8 (0.265 %) RMI1 (0.265 %) TOP3A (0.265 %) XRCC2 (0.265 %) RAD51D (0.177 %) WRN (0.177 %) NBN (0.088 %) PALB2 (0.088 %) RAD51B (0.088 %) RTEL1 (0.088 %)	0.011917	0.0217393	0.00398822	0.0019961	0.0019961	0.00597637	0.00398822	0.0019961	0.00796054	0.0275857	0.0019961	0.011917	0.00597637	0.0019961	0.00597637	0.0019961	0.00796054	0.00398822	0.0019961	0.00398822	0.0019961	0.0019961	0.00796054	0.011917	0.011917	0.0138893	0.0372523	0.0468227	0.0950765	0.0410919	0.0372523	0.0333972	0.0197827	0.248533	0.0295268	0.0968829	0.172891	0.112978	0.0217393
ERBB2 Activates PTK6 Signaling// Signaling By ERBB4	35	13	91539	37.5578	61	0.21063	0.000164696	0.0265209	96.7213	ERBB2 (1.502 %) ERBB3 (1.325 %) ERBB4 (1.060 %) EGFR (0.795 %) EGF (0.265 %) NRG1 (0.265 %) NRG3 (0.177 %) BTC (0.088 %) HBEGF (0.088 %)	0.0056259	0.01029	0.00187883	0.000939855	0.000939855	0.00281692	0.00187883	0.000939855	0.00375412	0.0130779	0.000939855	0.0056259	0.00281692	0.000939855	0.00281692	0.000939855	0.00375412	0.00187883	0.000939855	0.00187883	0.000939855	0.000939855	0.00375412	0.0056259	0.0056259	0.00656046	0.017707	0.0223144	0.0459268	0.0195526	0.017707	0.015858	0.0093589	0.125814	0.0140054	0.0468234	0.0854546	0.0548558	0.01029
Stabilization And Expansion Of The E Cadherin Adherens Junction	263	43	335329	139.478	179	0.108347	0.000168625	0.0269553	91.6201	CDH1 (6.095 %) EGFR (0.795 %) MYO6 (0.707 %) CYFIP2 (0.618 %) MET (0.618 %) NCKAP1 (0.618 %) ROCK1 (0.618 %) LPP (0.530 %) DIAPH1 (0.442 %) HGF (0.442 %) LIMA1 (0.442 %) CTNNA1 (0.353 %) ENAH (0.353 %) EPHA2 (0.353 %) IGF1R (0.353 %) PIP5K1C (0.353 %) VCL (0.353 %) CAMSAP3 (0.265 %) EGF (0.265 %) EXOC1 (0.265 %) EXOC3 (0.265 %) IGF1 (0.265 %) STX4 (0.265 %) ABI1 (0.177 %) ACTN1 (0.177 %) CTNNB1 (…	0.02274	0.0412945	0.00763819	0.00382642	0.00382642	0.0114354	0.00763819	0.00382642	0.015218	0.0522577	0.00382642	0.02274	0.0114354	0.00382642	0.0114354	0.00382642	0.015218	0.00763819	0.00382642	0.00763819	0.00382642	0.00382642	0.015218	0.02274	0.02274	0.0264794	0.0702517	0.0879041	0.174435	0.0773533	0.0702517	0.0630954	0.037612	0.422026	0.0558841	0.177594	0.305253	0.205487	0.0412945
AndrogenReceptor	303	167	1169403	356.273	408	0.0588777	0.000190489	0.0302298	72.0588	NCOR1 (3.534 %) PTEN (3.092 %) AKT1 (2.739 %) RUNX1 (2.385 %) RB1 (2.032 %) BRCA1 (1.325 %) CASP8 (1.325 %) FOXA1 (1.237 %) NCOA3 (0.883 %) PIK3R1 (0.883 %) CREBBP (0.795 %) EGFR (0.795 %) EP300 (0.707 %) NCOA6 (0.707 %) AR (0.618 %) KDM3A (0.618 %) NCOR2 (0.618 %) NSD1 (0.618 %) SVIL (0.618 %) FLNA (0.530 %) HDAC1 (0.530 %) IL6ST (0.530 %) JUN (0.530 %) NCOA1 (0.530 %) STAT3 (0.530 %) TCF4 (0.53…	0.0703013	0.125095	0.0240054	0.0120756	0.0120756	0.0357912	0.0240054	0.0120756	0.0474346	0.156409	0.0120756	0.0703013	0.0357912	0.0120756	0.0357912	0.0120756	0.0474346	0.0240054	0.0120756	0.0240054	0.0120756	0.0120756	0.0474346	0.0703013	0.0703013	0.081528	0.206128	0.252917	0.455265	0.225185	0.206128	0.186602	0.114401	0.824009	0.166596	0.461843	0.68468	0.517583	0.125095
ERBB2 Regulates Cell Motility	36	15	103476	44.884	68	0.180418	0.000482344	0.0759952	97.0588	ERBB2 (1.502 %) ERBB3 (1.325 %) ERBB4 (1.060 %) EGFR (0.795 %) DIAPH1 (0.442 %) EGF (0.265 %) NRG1 (0.265 %) NRG3 (0.177 %) BTC (0.088 %) HBEGF (0.088 %) MEMO1 (0.088 %) RHOA (0.088 %)	0.00676402	0.0123657	0.00225978	0.00113053	0.00113053	0.00338775	0.00225978	0.00113053	0.00451445	0.0157116	0.00113053	0.00676402	0.00338775	0.00113053	0.00338775	0.00113053	0.00451445	0.00225978	0.00113053	0.00225978	0.00113053	0.00113053	0.00451445	0.00676402	0.00676402	0.0078869	0.0212629	0.0267828	0.0549887	0.0234746	0.0212629	0.0190461	0.0112479	0.149352	0.0168244	0.056057	0.101888	0.0656181	0.0123657
RAF/MAP Kinase Cascade	114	116	756250	260.558	304	0.0669694	0.000646553	0.101139	76.3158	SPTA1 (2.562 %) AKAP9 (1.590 %) ERBB2 (1.502 %) ERBB3 (1.325 %) GRIN2A (1.325 %) SPTB (1.237 %) ERBB4 (1.060 %) SPTAN1 (1.060 %) GRIN2B (0.972 %) ACTN2 (0.795 %) EGFR (0.795 %) PDGFRA (0.795 %) SPTBN1 (0.795 %) KL (0.707 %) FGFR2 (0.618 %) JAK2 (0.618 %) KRAS (0.618 %) SOS1 (0.618 %) KIT (0.530 %) SPTBN2 (0.530 %) SPTBN5 (0.530 %) GRIN2D (0.442 %) JAK1 (0.442 %) JAK3 (0.442 %) NCAM1 (0.442 %) RAS…	0.0471415	0.0847239	0.0159674	0.00801584	0.00801584	0.0238553	0.0159674	0.00801584	0.0316799	0.106558	0.00801584	0.0471415	0.0238553	0.00801584	0.0238553	0.00801584	0.0316799	0.0159674	0.00801584	0.0159674	0.00801584	0.00801584	0.0316799	0.0471415	0.0471415	0.0547794	0.141797	0.175646	0.331291	0.1555	0.141797	0.127871	0.0773279	0.683643	0.11372	0.336652	0.534467	0.383001	0.0847239
FOXM1 Transcription Factor Network	314	43	236224	96.5844	127	0.118897	0.000735959	0.114308	92.126	RB1 (2.032 %) BRCA2 (1.678 %) LAMA4 (0.883 %) CENPF (0.795 %) CREBBP (0.795 %) EP300 (0.707 %) CCNA2 (0.442 %) ETV5 (0.442 %) CDC25B (0.353 %) CHEK2 (0.265 %) ESR1 (0.265 %) FOXM1 (0.265 %) GSK3A (0.265 %) MMP2 (0.265 %) NFATC3 (0.265 %) SP1 (0.265 %) XRCC1 (0.265 %) CCNB1 (0.177 %) CCNE1 (0.177 %) CDK2 (0.177 %) MYC (0.177 %) TGFA (0.177 %) AURKB (0.088 %) CCND1 (0.088 %) CDK4 (0.088 %) CENPB (0…	0.0151919	0.0276753	0.00508982	0.00254816	0.00254816	0.00762501	0.00508982	0.00254816	0.0101537	0.0350893	0.00254816	0.0151919	0.00762501	0.00254816	0.00762501	0.00254816	0.0101537	0.00508982	0.00254816	0.00508982	0.00254816	0.00254816	0.0101537	0.0151919	0.0151919	0.0177013	0.0473205	0.0593967	0.119769	0.0521695	0.0473205	0.0424468	0.0251914	0.3057	0.0375481	0.122012	0.215245	0.141943	0.0276753
ErbB Receptor Signaling Network	32	15	100451	43.4027	65	0.175397	0.000859915	0.132621	96.9231	ERBB2 (1.502 %) ERBB3 (1.325 %) ERBB4 (1.060 %) EGFR (0.795 %) EGF (0.265 %) NRG1 (0.265 %) NRG3 (0.177 %) TGFA (0.177 %) AREG (0.088 %) BTC (0.088 %) HBEGF (0.088 %) HSP90AA1 (0.088 %)	0.00653282	0.0119442	0.00218236	0.00109178	0.00109178	0.00327176	0.00218236	0.00109178	0.00435997	0.0151769	0.00109178	0.00653282	0.00327176	0.00109178	0.00327176	0.00109178	0.00435997	0.00218236	0.00109178	0.00218236	0.00109178	0.00109178	0.00435997	0.00653282	0.00653282	0.00761746	0.0205412	0.0258763	0.0531539	0.0226788	0.0205412	0.018399	0.0108643	0.14462	0.0162521	0.0541877	0.0985725	0.0634407	0.0119442
FCERI Mediated MAPK Activation	44	40	193941	80.2814	108	0.128809	0.000901439	0.138053	93.5185	MAP2K4 (3.445 %) KRAS (0.618 %) PLCG1 (0.618 %) SOS1 (0.618 %) JUN (0.530 %) VAV3 (0.530 %) LYN (0.442 %) PAK2 (0.353 %) PLCG2 (0.353 %) LCP2 (0.265 %) NRAS (0.265 %) SYK (0.265 %) VAV1 (0.265 %) GRB2 (0.177 %) MAP2K7 (0.177 %) MAPK1 (0.177 %) MAPK10 (0.177 %) MAPK3 (0.177 %) MAPK8 (0.177 %) VAV2 (0.177 %) GRAP2 (0.088 %) HRAS (0.088 %) LAT (0.088 %) PAK1 (0.088 %) SHC1 (0.088 %)	0.0124577	0.0227205	0.00416994	0.00208715	0.00208715	0.00624838	0.00416994	0.00208715	0.00832248	0.0288269	0.00208715	0.0124577	0.00624838	0.00208715	0.00624838	0.00208715	0.00832248	0.00416994	0.00208715	0.00416994	0.00208715	0.00208715	0.00832248	0.0124577	0.0124577	0.0145189	0.0389196	0.0489074	0.0991949	0.0429273	0.0389196	0.0348952	0.0206765	0.258273	0.0308539	0.101075	0.180029	0.11782	0.0227205
Resolution Of D Loop Structures Through Holliday Junction Intermediates	327	33	219945	90.9929	120	0.120174	0.000945149	0.143741	91.6667	ATM (2.032 %) BRCA2 (1.678 %) BRCA1 (1.325 %) BRIP1 (0.883 %) SLX4 (0.530 %) BLM (0.442 %) RAD50 (0.442 %) RAD51C (0.442 %) DNA2 (0.353 %) BARD1 (0.265 %) EXO1 (0.265 %) GEN1 (0.265 %) RAD51 (0.265 %) RAD51AP1 (0.265 %) RBBP8 (0.265 %) RMI1 (0.265 %) TOP3A (0.265 %) XRCC2 (0.265 %) MUS81 (0.177 %) RAD51D (0.177 %) SPIDR (0.177 %) WRN (0.177 %) EME1 (0.088 %) NBN (0.088 %) PALB2 (0.088 %) RAD51B (…	0.014246	0.0259625	0.00477139	0.00238855	0.00238855	0.00714855	0.00477139	0.00238855	0.00952002	0.0329254	0.00238855	0.014246	0.00714855	0.00238855	0.00714855	0.00238855	0.00952002	0.00477139	0.00238855	0.00477139	0.00238855	0.00238855	0.00952002	0.014246	0.014246	0.0166005	0.0444199	0.0557778	0.112698	0.0489794	0.0444199	0.0398386	0.0236304	0.289631	0.0352353	0.114818	0.203226	0.133666	0.0259625
NOTCH1 Intracellular Domain Regulates Transcription	279	47	337216	136.662	170	0.0948003	0.00112144	0.169376	92.3529	NCOR1 (3.534 %) FBXW7 (0.883 %) CREBBP (0.795 %) UBC (0.795 %) EP300 (0.707 %) NCOR2 (0.618 %) TBL1XR1 (0.618 %) HDAC1 (0.530 %) HDAC9 (0.530 %) HDAC6 (0.442 %) MAML2 (0.442 %) MAML3 (0.442 %) NOTCH1 (0.442 %) TLE3 (0.442 %) HDAC5 (0.353 %) HDAC8 (0.353 %) MAMLD1 (0.353 %) TBL1X (0.353 %) TLE1 (0.353 %) CUL1 (0.265 %) HDAC2 (0.265 %) HIF1A (0.265 %) KAT2B (0.265 %) CCNC (0.177 %) CDK8 (0.177 %) H…	0.0222283	0.0403739	0.007465	0.00373949	0.00373949	0.0111766	0.007465	0.00373949	0.0148743	0.0510992	0.00373949	0.0222283	0.0111766	0.00373949	0.0111766	0.00373949	0.0148743	0.007465	0.00373949	0.007465	0.00373949	0.00373949	0.0148743	0.0222283	0.0222283	0.0258846	0.0687091	0.0859921	0.170826	0.0756612	0.0687091	0.0617047	0.0367719	0.41477	0.0546476	0.173927	0.29947	0.201316	0.0403739
IL 6 Type Cytokine Receptor Ligand Interactions	226	20	82690	38.1945	58	0.181427	0.00118948	0.178422	96.5517	LIFR (0.707 %) JAK2 (0.618 %) IL27RA (0.530 %) IL6ST (0.530 %) JAK1 (0.442 %) TYK2 (0.442 %) IL11RA (0.353 %) OSMR (0.353 %) IL12A (0.265 %) IL12RB2 (0.265 %) CNTFR (0.177 %) IL27 (0.177 %) LIF (0.177 %) CLCF1 (0.088 %) CNTF (0.088 %) IL11 (0.088 %)	0.00572428	0.0104695	0.00191175	0.000956331	0.000956331	0.00286625	0.00191175	0.000956331	0.00381984	0.0133057	0.000956331	0.00572428	0.00286625	0.000956331	0.00286625	0.000956331	0.00381984	0.00191175	0.000956331	0.00191175	0.000956331	0.000956331	0.00381984	0.00572428	0.00572428	0.00667514	0.0180147	0.0227013	0.0467131	0.019892	0.0180147	0.0161338	0.00952226	0.127873	0.0142493	0.0476248	0.0868863	0.0557906	0.0104695
Nonhomologous End Joining (NHEJ)	323	69	350615	127.178	158	0.0942436	0.00183987	0.274103	87.9747	ATM (2.032 %) BRCA1 (1.325 %) HERC2 (1.325 %) PRKDC (0.972 %) RIF1 (0.972 %) MDC1 (0.883 %) PAXIP1 (0.618 %) HIST1H2BC (0.530 %) TP53BP1 (0.530 %) DCLRE1C (0.442 %) RAD50 (0.442 %) BRE (0.353 %) HIST1H2BD (0.353 %) HIST2H2BE (0.353 %) BARD1 (0.265 %) BRCC3 (0.265 %) HIST1H2BH (0.265 %) HIST1H4L (0.265 %) LIG4 (0.265 %) PIAS4 (0.265 %) HIST1H2BB (0.177 %) HIST1H2BE (0.177 %) HIST1H2BF (0.177 %) HI…	0.0205217	0.037301	0.0068879	0.0034499	0.0034499	0.010314	0.0068879	0.0034499	0.0137283	0.0472303	0.0034499	0.0205217	0.010314	0.0034499	0.010314	0.0034499	0.0137283	0.0068879	0.0034499	0.0068879	0.0034499	0.0034499	0.0137283	0.0205217	0.0205217	0.0239008	0.0635521	0.0795943	0.158688	0.0700023	0.0635521	0.0570572	0.0339683	0.389934	0.0505173	0.161591	0.279858	0.187266	0.037301
FOXA1 Transcription Factor Network	313	45	276002	114.565	144	0.0993113	0.00194945	0.288466	83.3333	APOB (1.943 %) BRCA1 (1.325 %) FOXA1 (1.237 %) CDKN1B (0.883 %) NCOA3 (0.883 %) CREBBP (0.795 %) DSCAM (0.795 %) EP300 (0.707 %) AR (0.618 %) COL18A1 (0.618 %) JUN (0.530 %) PRDM15 (0.442 %) SERPINA1 (0.442 %) NRIP1 (0.353 %) POU2F1 (0.353 %) AP1B1 (0.265 %) ESR1 (0.265 %) NFIC (0.265 %) SP1 (0.265 %) XBP1 (0.265 %) C4BPB (0.177 %) CYP2C18 (0.177 %) FOXA2 (0.177 %) KLK3 (0.177 %) NDUFV3 (0.177 %)…	0.0182922	0.0332799	0.00613497	0.0030722	0.0030722	0.00918832	0.00613497	0.0030722	0.0122323	0.0421624	0.0030722	0.0182922	0.00918832	0.0030722	0.00918832	0.0030722	0.0122323	0.00613497	0.0030722	0.00613497	0.0030722	0.0030722	0.0122323	0.0182922	0.0182922	0.0213082	0.0567856	0.0711856	0.142596	0.0625722	0.0567856	0.0509633	0.0303008	0.355964	0.0451051	0.145231	0.253462	0.168576	0.0332799
Validated Transcriptional Targets Of DeltaNp63 Isoforms	330	47	304273	112.746	140	0.0940274	0.00355188	0.522055	85	RUNX1 (2.385 %) ATM (2.032 %) BRCA2 (1.678 %) FBXW7 (0.883 %) COL5A1 (0.795 %) AXL (0.618 %) FASN (0.618 %) ITCH (0.442 %) NOTCH1 (0.442 %) DLX5 (0.265 %) DLX6 (0.265 %) NRG1 (0.265 %) POU2F2 (0.265 %) T (0.265 %) TP63 (0.265 %) YAP1 (0.265 %) ADA (0.177 %) FOSL2 (0.177 %) IL1A (0.177 %) KRT14 (0.177 %) MDM2 (0.177 %) PERP (0.177 %) TCF7L1 (0.177 %) TOP2A (0.177 %) WWP1 (0.177 %) BDKRB2 (0.088 %)…	0.0179745	0.0327061	0.00602775	0.00301843	0.00301843	0.00902798	0.00602775	0.00301843	0.0120192	0.0414388	0.00301843	0.0179745	0.00902798	0.00301843	0.00902798	0.00301843	0.0120192	0.00602775	0.00301843	0.00602775	0.00301843	0.00301843	0.0120192	0.0179745	0.0179745	0.0209386	0.0558185	0.0699825	0.140281	0.0615098	0.0558185	0.0500927	0.0297776	0.350978	0.0443322	0.142876	0.249627	0.165881	0.0327061
Regulation Of Insulin Secretion	372	33	219142	93.5785	118	0.100706	0.00470759	0.687308	90.678	CACNA1E (2.120 %) ITPR1 (1.325 %) CACNA1A (1.060 %) CACNA1C (1.060 %) ITPR3 (0.883 %) ITPR2 (0.795 %) ABCC8 (0.707 %) CACNA1D (0.707 %) CACNB2 (0.442 %) CACNA2D2 (0.265 %) RAPGEF4 (0.265 %) STXBP1 (0.265 %) CACNB3 (0.177 %) GNAI1 (0.177 %) GNAI2 (0.177 %) PRKACA (0.177 %) PRKACG (0.177 %) SNAP25 (0.177 %) SYT5 (0.177 %) AHCYL1 (0.088 %) ARL2 (0.088 %) RAPGEF3 (0.088 %) SLC25A4 (0.088 %) SLC2A1 (0…	0.0146823	0.0267528	0.00491825	0.00246216	0.00246216	0.0073683	0.00491825	0.00246216	0.00981232	0.033924	0.00246216	0.0146823	0.0073683	0.00246216	0.0073683	0.00246216	0.00981232	0.00491825	0.00246216	0.00491825	0.00246216	0.00246216	0.00981232	0.0146823	0.0146823	0.0171083	0.0457587	0.0574485	0.115966	0.0504519	0.0457587	0.0410423	0.0243506	0.297087	0.0363026	0.118143	0.208791	0.137493	0.0267528
VEGFR2 Mediated Cell Proliferation	299	21	161672	59.1363	79	0.125773	0.00539695	0.782737	96.2025	ITPR1 (1.325 %) ITPR3 (0.883 %) ITPR2 (0.795 %) PRKCB (0.795 %) KRAS (0.618 %) PLCG1 (0.618 %) PRKCZ (0.530 %) KDR (0.353 %) NRAS (0.265 %) PRKCD (0.265 %) RASA1 (0.265 %) PRKCA (0.177 %) AHCYL1 (0.088 %) CALM2 (0.088 %) CALM3 (0.088 %) HRAS (0.088 %)	0.00901731	0.0164696	0.00301485	0.00150856	0.00150856	0.00451886	0.00301485	0.00150856	0.00602061	0.020914	0.00150856	0.00901731	0.00451886	0.00150856	0.00451886	0.00150856	0.00602061	0.00301485	0.00150856	0.00301485	0.00150856	0.00150856	0.00602061	0.00901731	0.00901731	0.0105123	0.0282768	0.0355843	0.0727064	0.0312064	0.0282768	0.0253384	0.0149836	0.194174	0.022391	0.0741053	0.133611	0.0866007	0.0164696
Constitutive Signaling By AKT1 E17K In Cancer	20	25	190331	76.2017	98	0.109262	0.00587565	0.846558	97.9592	AKT1 (2.739 %) MTOR (1.325 %) CDKN1B (0.883 %) RICTOR (0.707 %) AKT2 (0.353 %) AKT3 (0.353 %) FOXO4 (0.353 %) RPS6KB2 (0.353 %) TSC2 (0.353 %) GSK3A (0.265 %) CHUK (0.177 %) CREB1 (0.177 %) MAPKAP1 (0.177 %) MDM2 (0.177 %) NR4A1 (0.177 %) FOXO1 (0.088 %) FOXO3 (0.088 %) GSK3B (0.088 %)	0.0117847	0.0214992	0.00394377	0.00197383	0.00197383	0.00590982	0.00394377	0.00197383	0.00787199	0.0272819	0.00197383	0.0117847	0.00590982	0.00197383	0.00590982	0.00197383	0.00787199	0.00394377	0.00197383	0.00394377	0.00197383	0.00197383	0.00787199	0.0117847	0.0117847	0.0137353	0.036844	0.0463121	0.0940664	0.0406425	0.036844	0.0330305	0.0195639	0.246131	0.0292019	0.0958545	0.171136	0.11179	0.0214992
Validated Nuclear Estrogen Receptor Alpha Network	329	65	420480	175.121	204	0.0662929	0.00758603	1.08584	85.7843	NCOR1 (3.534 %) BRCA1 (1.325 %) C3 (0.883 %) LCOR (0.883 %) NCOA3 (0.883 %) DSCAM (0.795 %) EP300 (0.707 %) COL18A1 (0.618 %) NCOR2 (0.618 %) SFI1 (0.618 %) SMAD4 (0.618 %) GREB1 (0.530 %) HDAC1 (0.530 %) JUN (0.530 %) NCOA1 (0.530 %) PGR (0.530 %) PRDM15 (0.442 %) ABCA3 (0.353 %) NRIP1 (0.353 %) POU4F2 (0.353 %) SAFB (0.353 %) AP1B1 (0.265 %) APBB1 (0.265 %) DDX17 (0.265 %) ESR1 (0.265 %) MED1 (…	0.0294249	0.0532831	0.0099061	0.00496538	0.00496538	0.0148223	0.0099061	0.00496538	0.0197141	0.0673157	0.00496538	0.0294249	0.0148223	0.00496538	0.0148223	0.00496538	0.0197141	0.0099061	0.00496538	0.0099061	0.00496538	0.00496538	0.0197141	0.0294249	0.0294249	0.0342442	0.0902425	0.112606	0.220332	0.0992547	0.0902425	0.0811402	0.0485589	0.509249	0.0719468	0.224204	0.376799	0.258192	0.0532831
Collagen Degradation	243	39	201008	91.1617	113	0.0932658	0.00939227	1.33565	92.0354	COL12A1 (1.502 %) COL14A1 (0.972 %) COL19A1 (0.883 %) COL15A1 (0.795 %) COL18A1 (0.618 %) COL9A1 (0.530 %) COL16A1 (0.442 %) COL17A1 (0.442 %) COL13A1 (0.353 %) COL23A1 (0.353 %) COL25A1 (0.353 %) COL9A3 (0.353 %) ADAM9 (0.265 %) MMP14 (0.265 %) MMP15 (0.265 %) MMP2 (0.265 %) MMP8 (0.265 %) CTSB (0.177 %) MMP1 (0.177 %) MMP11 (0.177 %) MMP3 (0.177 %) MMP9 (0.177 %) ADAM10 (0.088 %) ADAM17 (0.088 …	0.0142744	0.026014	0.00478096	0.00239335	0.00239335	0.00716287	0.00478096	0.00239335	0.00953907	0.0329906	0.00239335	0.0142744	0.00716287	0.00239335	0.00716287	0.00239335	0.00953907	0.00478096	0.00239335	0.00478096	0.00239335	0.00239335	0.00953907	0.0142744	0.0142744	0.0166336	0.0445072	0.0558868	0.112912	0.0490754	0.0445072	0.0399171	0.0236773	0.29012	0.0353049	0.115035	0.203589	0.133916	0.026014
Insulin Signalling	364	17	113299	45.7083	62	0.132396	0.00974617	1.37704	96.7742	AKT1 (2.739 %) PIK3CG (0.618 %) SOS1 (0.618 %) INSR (0.530 %) IRS1 (0.265 %) GRB2 (0.177 %) MAPK1 (0.177 %) HRAS (0.088 %) MAP2K1 (0.088 %) MAP2K2 (0.088 %) RAF1 (0.088 %) SHC1 (0.088 %) SLC2A4 (0.088 %)	0.00689294	0.0126007	0.00230295	0.00115214	0.00115214	0.00345243	0.00230295	0.00115214	0.00460059	0.0160097	0.00115214	0.00689294	0.00345243	0.00115214	0.00345243	0.00115214	0.00460059	0.00230295	0.00115214	0.00230295	0.00115214	0.00115214	0.00460059	0.00689294	0.00689294	0.00803713	0.0216651	0.027288	0.0560103	0.0239181	0.0216651	0.0194068	0.0114618	0.15198	0.0171434	0.0570979	0.103732	0.0668302	0.0126007
Constitutive Signaling By NOTCH1 HD+PEST Domain Mutants// Constitutive Signaling By NOTCH1 PEST Domain Mutants	269	57	395793	157.886	184	0.0664737	0.011362	1.59505	92.9348	NCOR1 (3.534 %) FBXW7 (0.883 %) CREBBP (0.795 %) UBC (0.795 %) EP300 (0.707 %) NCOR2 (0.618 %) TBL1XR1 (0.618 %) HDAC1 (0.530 %) HDAC9 (0.530 %) MIB1 (0.530 %) HDAC6 (0.442 %) MAML2 (0.442 %) MAML3 (0.442 %) NOTCH1 (0.442 %) HDAC5 (0.353 %) HDAC8 (0.353 %) MAMLD1 (0.353 %) TBL1X (0.353 %) APH1B (0.265 %) CUL1 (0.265 %) DLL1 (0.265 %) HDAC2 (0.265 %) JAG1 (0.265 %) KAT2B (0.265 %) PSEN2 (0.265 %) …	0.026144	0.0474078	0.00879174	0.00440557	0.00440557	0.0131586	0.00879174	0.00440557	0.0175062	0.0599425	0.00440557	0.026144	0.0131586	0.00440557	0.0131586	0.00440557	0.0175062	0.00879174	0.00440557	0.00879174	0.00440557	0.00440557	0.0175062	0.026144	0.026144	0.0304344	0.0804684	0.100546	0.198095	0.0885526	0.0804684	0.0723124	0.0431925	0.468147	0.064084	0.201628	0.342594	0.232731	0.0474078
GRB2:SOS Provides Linkage To MAPK Signaling For Integrins	62	15	118635	53.8236	70	0.114126	0.0151183	2.10886	97.1429	TLN1 (1.325 %) VWF (1.237 %) FGA (0.618 %) SOS1 (0.618 %) ITGB3 (0.530 %) FN1 (0.442 %) PTK2 (0.353 %) APBB1IP (0.265 %) FGG (0.265 %) ITGA2B (0.265 %) GRB2 (0.177 %) RAP1B (0.177 %) FGB (0.088 %)	0.00817127	0.0149296	0.00273121	0.00136654	0.00136654	0.00409401	0.00273121	0.00136654	0.00545496	0.0189625	0.00136654	0.00817127	0.00409401	0.00136654	0.00409401	0.00136654	0.00545496	0.00273121	0.00136654	0.00273121	0.00136654	0.00136654	0.00545496	0.00817127	0.00817127	0.00952664	0.0256473	0.0322866	0.0660885	0.0283085	0.0256473	0.0229789	0.0135816	0.177617	0.0203031	0.0673647	0.121825	0.0787726	0.0149296
Class I PI3K Signaling Events Mediated By Akt	17	35	235572	94.1113	114	0.0832633	0.0172118	2.38569	94.7368	AKT1 (2.739 %) MTOR (1.325 %) PRKDC (0.972 %) CDKN1B (0.883 %) RICTOR (0.707 %) TBC1D4 (0.707 %) AKT2 (0.353 %) AKT3 (0.353 %) FOXO4 (0.353 %) GSK3A (0.265 %) KPNA1 (0.265 %) CHUK (0.177 %) MAPKAP1 (0.177 %) PRKACA (0.177 %) BCL2L1 (0.088 %) FOXO1 (0.088 %) FOXO3 (0.088 %) GSK3B (0.088 %) HSP90AA1 (0.088 %) MAP3K5 (0.088 %) RAF1 (0.088 %) SFN (0.088 %) SLC2A4 (0.088 %) YWHAB (0.088 %) YWHAG (0.08…	0.0147725	0.026916	0.0049486	0.00247737	0.00247737	0.00741371	0.0049486	0.00247737	0.00987271	0.0341302	0.00247737	0.0147725	0.00741371	0.00247737	0.00741371	0.00247737	0.00987271	0.0049486	0.00247737	0.0049486	0.00247737	0.00247737	0.00987271	0.0147725	0.0147725	0.0172132	0.0460351	0.0577933	0.11664	0.0507559	0.0460351	0.0412908	0.0244993	0.298618	0.036523	0.118828	0.209937	0.138281	0.026916
P38 MAPK Pathway	91	31	199922	70.1091	87	0.0937452	0.0213478	2.94035	98.8506	MAP2K4 (3.445 %) MAP3K4 (0.530 %) MAP3K10 (0.442 %) EEF2K (0.353 %) RPS6KA5 (0.353 %) TRAF6 (0.353 %) DUSP10 (0.265 %) MEF2C (0.265 %) TAB2 (0.265 %) ELK1 (0.177 %) IL1R1 (0.177 %) MAPK13 (0.177 %) MAPK14 (0.177 %) MAPKAPK3 (0.177 %) MAP2K6 (0.088 %) MAP3K5 (0.088 %) MAP3K7 (0.088 %) MEF2B (0.088 %) MEF2D (0.088 %) RPS6KA4 (0.088 %) SRF (0.088 %)	0.0107879	0.0196889	0.00360898	0.00180612	0.00180612	0.00540858	0.00360898	0.00180612	0.00720493	0.024991	0.00180612	0.0107879	0.00540858	0.00180612	0.00540858	0.00180612	0.00720493	0.00360898	0.00180612	0.00360898	0.00180612	0.00180612	0.00720493	0.0107879	0.0107879	0.0125745	0.0337642	0.0424584	0.0864231	0.0372513	0.0337642	0.0302644	0.0179151	0.227798	0.026752	0.0880731	0.157799	0.10279	0.0196889
Recognition Of DNA Damage By PCNA Containing Replication Complex	216	28	134052	56.7609	72	0.103283	0.02285	3.1276	98.6111	POLE (1.148 %) UBC (0.795 %) CUL4B (0.707 %) DDB1 (0.442 %) USP1 (0.442 %) DTL (0.353 %) POLD1 (0.353 %) RFC1 (0.353 %) RFC4 (0.353 %) RFC5 (0.265 %) CUL4A (0.177 %) POLD2 (0.177 %) RAD18 (0.177 %) RPA3 (0.177 %) POLD3 (0.088 %) POLE2 (0.088 %) RFC2 (0.088 %) RPA1 (0.088 %) RPA2 (0.088 %) UBA52 (0.088 %)	0.00863812	0.0157795	0.00288771	0.0014449	0.0014449	0.00432843	0.00288771	0.0014449	0.00576707	0.0200397	0.0014449	0.00863812	0.00432843	0.0014449	0.00432843	0.0014449	0.00576707	0.00288771	0.0014449	0.00288771	0.0014449	0.0014449	0.00576707	0.00863812	0.00863812	0.0100705	0.0270989	0.0341074	0.0697455	0.0299084	0.0270989	0.0242814	0.0143554	0.186793	0.0214556	0.0710896	0.128347	0.0830997	0.0157795
Regulation Of Telomerase	217	70	469454	184.987	209	0.0530048	0.02375	3.23059	84.689	AKT1 (2.739 %) ATM (2.032 %) MTOR (1.325 %) CDKN1B (0.883 %) SMG5 (0.883 %) EGFR (0.795 %) SIN3B (0.618 %) SP3 (0.618 %) ABL1 (0.530 %) HDAC1 (0.530 %) JUN (0.530 %) BLM (0.442 %) NCL (0.442 %) RAD50 (0.442 %) SIN3A (0.442 %) DKC1 (0.353 %) E2F1 (0.353 %) NFKB1 (0.353 %) RPS6KB1 (0.353 %) TERF2 (0.353 %) EGF (0.265 %) ESR1 (0.265 %) HDAC2 (0.265 %) PINX1 (0.265 %) POT1 (0.265 %) RBBP7 (0.265 %) S…	0.0313452	0.0567144	0.0105595	0.00529377	0.00529377	0.0157974	0.0105595	0.00529377	0.0210075	0.0716158	0.00529377	0.0313452	0.0157974	0.00529377	0.0157974	0.00529377	0.0210075	0.0105595	0.00529377	0.0105595	0.00529377	0.00529377	0.0210075	0.0313452	0.0313452	0.0364731	0.0959303	0.119608	0.233095	0.105477	0.0959303	0.0862819	0.0516943	0.531875	0.0765305	0.237154	0.396038	0.272739	0.0567144
Insulin Mediated Glucose Transport	359	30	191448	67.42	82	0.0850251	0.0375784	5.08004	93.9024	AKT1 (2.739 %) PPP1R3A (0.795 %) TBC1D4 (0.707 %) INSR (0.530 %) PRKCZ (0.530 %) AKT2 (0.353 %) GYS1 (0.353 %) TRIP10 (0.353 %) STX4 (0.265 %) PRKCI (0.177 %) CALM2 (0.088 %) CALM3 (0.088 %) GSK3B (0.088 %) LNPEP (0.088 %) SFN (0.088 %) SLC2A4 (0.088 %) YWHAB (0.088 %) YWHAG (0.088 %) YWHAH (0.088 %) YWHAZ (0.088 %)	0.0103511	0.0188951	0.00346233	0.00173267	0.00173267	0.005189	0.00346233	0.00173267	0.00691268	0.023986	0.00173267	0.0103511	0.005189	0.00173267	0.005189	0.00173267	0.00691268	0.00346233	0.00173267	0.00346233	0.00173267	0.00173267	0.00691268	0.0103511	0.0103511	0.0120658	0.0324123	0.0407659	0.0830557	0.0357624	0.0324123	0.0290506	0.0171922	0.219629	0.0256771	0.0846444	0.151891	0.09882	0.0188951
Heterotrimeric GPCR Signaling Pathway (through Glutamate// G Alpha Q And PLC Beta) ( GPCR GroupI Metabotropic Glutamate Receptor Signaling Pathway )	66	18	126203	56.0221	69	0.0904895	0.0433734	5.82747	95.6522	PRKCQ (1.060 %) BRAF (0.795 %) PRKCB (0.795 %) GRM1 (0.618 %) GRM5 (0.618 %) PRKCZ (0.530 %) ARAF (0.353 %) GNB3 (0.265 %) PRKCD (0.265 %) PRKCE (0.265 %) PRKCA (0.177 %) PRKCG (0.177 %) PRKCI (0.177 %) GNAQ (0.088 %) PRKCH (0.088 %) RAF1 (0.088 %)	0.0085205	0.0155654	0.00284827	0.00142515	0.00142515	0.00426936	0.00284827	0.00142515	0.00568843	0.0197683	0.00142515	0.0085205	0.00426936	0.00142515	0.00426936	0.00142515	0.00568843	0.00284827	0.00142515	0.00284827	0.00142515	0.00142515	0.00568843	0.0085205	0.0085205	0.0099335	0.0267333	0.0336489	0.0688253	0.0295055	0.0267333	0.0239533	0.0141605	0.18449	0.0211653	0.0701523	0.126709	0.0820111	0.0155654
P130Cas Linkage To MAPK Signaling For Integrins	90	15	117924	53.4813	66	0.0913423	0.0459719	6.13893	98.4848	TLN1 (1.325 %) VWF (1.237 %) FGA (0.618 %) ITGB3 (0.530 %) FN1 (0.442 %) PTK2 (0.353 %) APBB1IP (0.265 %) BCAR1 (0.265 %) FGG (0.265 %) ITGA2B (0.265 %) RAP1B (0.177 %) CRK (0.088 %) FGB (0.088 %)	0.008117	0.0148308	0.00271302	0.00135743	0.00135743	0.00406677	0.00271302	0.00135743	0.00541868	0.0188373	0.00135743	0.008117	0.00406677	0.00135743	0.00406677	0.00135743	0.00541868	0.00271302	0.00135743	0.00271302	0.00135743	0.00135743	0.00541868	0.008117	0.008117	0.00946342	0.0254785	0.0320748	0.0656627	0.0281224	0.0254785	0.0228274	0.0134917	0.176544	0.0201691	0.066931	0.121064	0.0782685	0.0148308
ATR Signaling Pathway	306	39	230819	96.7235	112	0.063686	0.0539818	7.16485	95.5357	BRCA2 (1.678 %) ATR (1.590 %) TOPBP1 (0.618 %) CEP164 (0.530 %) FANCD2 (0.530 %) CCNA2 (0.442 %) MCM7 (0.353 %) RFC4 (0.353 %) TIMELESS (0.353 %) CLSPN (0.265 %) RAD51 (0.265 %) RFC5 (0.265 %) SMARCAL1 (0.265 %) TIPIN (0.265 %) BTRC (0.177 %) CDC25C (0.177 %) CDC6 (0.177 %) CDK2 (0.177 %) HUS1 (0.177 %) MDM2 (0.177 %) PPP2CA (0.177 %) PPP2R1A (0.177 %) RAD17 (0.177 %) CDC25A (0.088 %) MCM2 (0.088…	0.0152155	0.0277181	0.00509778	0.00255215	0.00255215	0.00763692	0.00509778	0.00255215	0.0101696	0.0351434	0.00255215	0.0152155	0.00763692	0.00255215	0.00763692	0.00255215	0.0101696	0.00509778	0.00255215	0.00509778	0.00255215	0.00255215	0.0101696	0.0152155	0.0152155	0.0177288	0.047393	0.059487	0.119945	0.0522491	0.047393	0.0425119	0.0252304	0.306097	0.0376058	0.122191	0.215543	0.142149	0.0277181
NGF Signaling Pathway ( NGF Signaling Pathway )	89	16	93133	47.2872	58	0.0886842	0.0642566	8.47723	94.8276	BRAF (0.795 %) KRAS (0.618 %) PLCG1 (0.618 %) SOS1 (0.618 %) NTRK1 (0.442 %) SOS2 (0.442 %) ARAF (0.353 %) NRAS (0.265 %) PRKCD (0.265 %) SHC3 (0.265 %) GRB2 (0.177 %) NGF (0.177 %) HRAS (0.088 %) RAF1 (0.088 %) SHC1 (0.088 %) SHC2 (0.088 %)	0.00714033	0.0130516	0.0023858	0.00119361	0.00119361	0.00357656	0.0023858	0.00119361	0.00476591	0.0165815	0.00119361	0.00714033	0.00357656	0.00119361	0.00357656	0.00119361	0.00476591	0.0023858	0.00119361	0.0023858	0.00119361	0.00119361	0.00476591	0.00714033	0.00714033	0.00832542	0.0224366	0.0282569	0.0579682	0.0247689	0.0224366	0.0200988	0.0118722	0.157	0.0177554	0.0590926	0.107261	0.0691522	0.0130516
VEGFR2 Mediated Vascular Permeability	300	29	207985	82.697	96	0.0647812	0.0679678	8.91315	95.8333	AKT1 (2.739 %) MTOR (1.325 %) RICTOR (0.707 %) VAV3 (0.530 %) AKT2 (0.353 %) AKT3 (0.353 %) CTNNA1 (0.353 %) NOS3 (0.353 %) PAK2 (0.353 %) PAK3 (0.265 %) VAV1 (0.265 %) CTNNB1 (0.177 %) MAPKAP1 (0.177 %) VAV2 (0.177 %) CALM2 (0.088 %) CALM3 (0.088 %) CDH5 (0.088 %) CTNND1 (0.088 %) HSP90AA1 (0.088 %) JUP (0.088 %) PAK1 (0.088 %) TRIB3 (0.088 %)	0.0128583	0.0234472	0.0043046	0.00215462	0.00215462	0.00644995	0.0043046	0.00215462	0.00859068	0.0297459	0.00215462	0.0128583	0.00644995	0.00215462	0.00644995	0.00215462	0.00859068	0.0043046	0.00215462	0.0043046	0.00215462	0.00215462	0.00859068	0.0128583	0.0128583	0.0149852	0.0401536	0.0504497	0.102235	0.0442854	0.0401536	0.036004	0.0213385	0.265411	0.0318364	0.10417	0.185279	0.121392	0.0234472
Cyclin D Associated Events In G1	150	38	211328	78.9862	92	0.0662368	0.0685737	8.93907	93.4783	RB1 (2.032 %) CDKN1B (0.883 %) UBC (0.795 %) RBL1 (0.530 %) E2F1 (0.353 %) E2F4 (0.353 %) TFDP2 (0.353 %) CCNH (0.265 %) CUL1 (0.265 %) PPP2CB (0.265 %) RBL2 (0.265 %) TFDP1 (0.265 %) CCND3 (0.177 %) CDK7 (0.177 %) E2F5 (0.177 %) MNAT1 (0.177 %) PPP2CA (0.177 %) PPP2R1A (0.177 %) PPP2R2A (0.177 %) CCND1 (0.088 %) CCND2 (0.088 %) CDK4 (0.088 %) CDK6 (0.088 %) CKS1B (0.088 %) E2F3 (0.088 %) PPP2R3B…	0.0122436	0.022332	0.00409796	0.00205108	0.00205108	0.00614064	0.00409796	0.00205108	0.00817913	0.0283355	0.00205108	0.0122436	0.00614064	0.00205108	0.00614064	0.00205108	0.00817913	0.00409796	0.00205108	0.00409796	0.00205108	0.00205108	0.00817913	0.0122436	0.0122436	0.0142695	0.0382595	0.0480822	0.0975658	0.0422007	0.0382595	0.0343021	0.0203226	0.25443	0.0303284	0.0994168	0.177209	0.115906	0.022332
P73 Transcription Factor Network	324	79	427589	157.958	173	0.0395044	0.0954332	12.3668	87.2832	RB1 (2.032 %) BRCA2 (1.678 %) EP300 (0.707 %) FASN (0.618 %) ABL1 (0.530 %) IL1RAP (0.530 %) IL4R (0.530 %) NEDD4L (0.530 %) UBE4B (0.530 %) CCNA2 (0.442 %) ITCH (0.442 %) JAK1 (0.442 %) NTRK1 (0.442 %) SERPINA1 (0.442 %) CASP2 (0.353 %) BCL2L11 (0.265 %) NDUFS2 (0.265 %) PLK3 (0.265 %) PLPP1 (0.265 %) RAD51 (0.265 %) SERPINE1 (0.265 %) SP1 (0.265 %) TP63 (0.265 %) YAP1 (0.265 %) ADA (0.177 %) AF…	0.0261575	0.047432	0.00879631	0.00440787	0.00440787	0.0131654	0.00879631	0.00440787	0.0175153	0.0599729	0.00440787	0.0261575	0.0131654	0.00440787	0.0131654	0.00440787	0.0175153	0.00879631	0.00440787	0.00879631	0.00440787	0.00440787	0.0175153	0.0261575	0.0261575	0.0304501	0.0805087	0.100596	0.198188	0.0885968	0.0805087	0.0723488	0.0432146	0.468323	0.0641164	0.201722	0.342739	0.232838	0.047432
Apoptotic Cleavage Of Cellular Proteins	335	18	122473	55.4518	65	0.0689976	0.10327	13.3035	92.3077	CASP8 (1.325 %) PRKCQ (1.060 %) APC (0.707 %) ROCK1 (0.618 %) BMX (0.353 %) PTK2 (0.353 %) SATB1 (0.353 %) ACIN1 (0.265 %) CLSPN (0.265 %) PRKCD (0.265 %) CASP6 (0.177 %) CASP7 (0.177 %) BCAP31 (0.088 %) BIRC2 (0.088 %) STK24 (0.088 %) STK26 (0.088 %)	0.00842979	0.0154003	0.00281786	0.00140992	0.00140992	0.00422381	0.00281786	0.00140992	0.00562778	0.0195591	0.00140992	0.00842979	0.00422381	0.00140992	0.00422381	0.00140992	0.00562778	0.00281786	0.00140992	0.00281786	0.00140992	0.00140992	0.00562778	0.00842979	0.00842979	0.00982782	0.0264513	0.0332952	0.0681151	0.0291947	0.0264513	0.0237003	0.0140101	0.18271	0.0209414	0.069429	0.125443	0.0811709	0.0154003
HIF 1 Alpha Transcription Factor Network	271	67	411122	151.233	165	0.0378367	0.112215	14.3714	90.9091	AKT1 (2.739 %) CREBBP (0.795 %) ABCB1 (0.707 %) EP300 (0.707 %) CP (0.618 %) SMAD4 (0.618 %) JUN (0.530 %) NCOA1 (0.530 %) TF (0.530 %) ABCG2 (0.353 %) ALDOA (0.353 %) GCK (0.353 %) HK2 (0.353 %) ITGB2 (0.353 %) NOS2 (0.353 %) PGM1 (0.353 %) ARNT (0.265 %) ETS1 (0.265 %) HIF1A (0.265 %) NT5E (0.265 %) PGK1 (0.265 %) PLIN2 (0.265 %) SERPINE1 (0.265 %) SLC2A3 (0.265 %) SP1 (0.265 %) CA9 (0.177 %) C…	0.024902	0.0451793	0.00837053	0.00419406	0.00419406	0.0125295	0.00837053	0.00419406	0.016671	0.0571427	0.00419406	0.024902	0.0125295	0.00419406	0.0125295	0.00419406	0.016671	0.00837053	0.00419406	0.00837053	0.00419406	0.00419406	0.016671	0.024902	0.024902	0.0289916	0.0767495	0.0959486	0.189532	0.0844776	0.0767495	0.0689562	0.0411578	0.451743	0.0610971	0.192932	0.329193	0.22289	0.0451793
Drosophila Toll Like Receptor Signaling ( Drosophila Toll Like Receptor Signaling )	27	235	1481942	410.621	428	0.0180026	0.124854	15.8971	70.7944	MAP2K4 (3.445 %) AKT1 (2.739 %) CASP8 (1.325 %) MTOR (1.325 %) PRKCQ (1.060 %) BRAF (0.795 %) EGFR (0.795 %) ESPL1 (0.795 %) PDGFRA (0.795 %) PRKCB (0.795 %) MAP3K13 (0.707 %) ACVR1B (0.618 %) FGFR2 (0.618 %) JAK2 (0.618 %) MET (0.618 %) PRKG2 (0.618 %) ALK (0.530 %) BTK (0.530 %) INSR (0.530 %) ITK (0.530 %) KIT (0.530 %) PRKCZ (0.530 %) TLL2 (0.530 %) BMPR2 (0.442 %) IRAK2 (0.442 %) JAK1 (0.442…	0.0853228	0.150837	0.0292905	0.0147541	0.0147541	0.0436124	0.0292905	0.0147541	0.057723	0.187871	0.0147541	0.0853228	0.0436124	0.0147541	0.0436124	0.0147541	0.057723	0.0292905	0.0147541	0.0292905	0.0147541	0.0147541	0.057723	0.0853228	0.0853228	0.098818	0.24604	0.300043	0.524411	0.268124	0.24604	0.22329	0.138121	0.880633	0.199853	0.531427	0.756364	0.590099	0.150837
Downregulation Of SMAD2/3:SMAD4 Transcriptional Activity	153	23	217149	94.6422	105	0.0451045	0.137022	17.3456	92.381	NCOR1 (3.534 %) USP9X (1.148 %) UBC (0.795 %) NCOR2 (0.618 %) SMAD4 (0.618 %) HDAC1 (0.530 %) NEDD4L (0.530 %) SMAD2 (0.442 %) PARP1 (0.265 %) RNF111 (0.265 %) SKIL (0.265 %) TRIM33 (0.265 %) SMAD3 (0.177 %) SMURF2 (0.177 %) TGIF2 (0.177 %) PPM1A (0.088 %) UBA52 (0.088 %) UBE2D3 (0.088 %)	0.0148624	0.0270788	0.00497887	0.00249254	0.00249254	0.007459	0.00497887	0.00249254	0.00993294	0.0343358	0.00249254	0.0148624	0.007459	0.00249254	0.007459	0.00249254	0.00993294	0.00497887	0.00249254	0.00497887	0.00249254	0.00249254	0.00993294	0.0148624	0.0148624	0.0173179	0.0463107	0.0581372	0.117311	0.051059	0.0463107	0.0415387	0.0246477	0.300142	0.0367428	0.119511	0.211077	0.139067	0.0270788
BCR	10	161	1021557	337.342	350	0.0159978	0.193816	24.3941	75.1429	AKT1 (2.739 %) RB1 (2.032 %) ITPR1 (1.325 %) PRKCQ (1.060 %) CBLB (0.883 %) PIK3R1 (0.883 %) BRAF (0.795 %) ITPR2 (0.795 %) PRKCB (0.795 %) CARD11 (0.618 %) CR2 (0.618 %) MAPK4 (0.618 %) NEDD9 (0.618 %) PIK3CG (0.618 %) PLCG1 (0.618 %) SOS1 (0.618 %) BANK1 (0.530 %) BTK (0.530 %) CD19 (0.530 %) ITK (0.530 %) JUN (0.530 %) PIP4K2C (0.530 %) STAT3 (0.530 %) ATP2B4 (0.442 %) CBL (0.442 %) CCNA2 (0.4…	0.0654073	0.116633	0.0222958	0.0112108	0.0112108	0.0332566	0.0222958	0.0112108	0.0440946	0.146011	0.0112108	0.0654073	0.0332566	0.0112108	0.0332566	0.0112108	0.0440946	0.0222958	0.0112108	0.0222958	0.0112108	0.0112108	0.0440946	0.0654073	0.0654073	0.0758848	0.192819	0.237061	0.430903	0.210816	0.192819	0.174412	0.106618	0.80055	0.155585	0.437283	0.657347	0.491578	0.116633
Coregulation Of Androgen Receptor Activity	309	61	443657	170.33	179	0.0215614	0.235152	29.4276	84.3575	AKT1 (2.739 %) BRCA1 (1.325 %) CASP8 (1.325 %) PRKDC (0.972 %) NCOA6 (0.707 %) AR (0.618 %) KDM3A (0.618 %) SVIL (0.618 %) TCF4 (0.530 %) VAV3 (0.530 %) ZNF318 (0.530 %) KDM4C (0.442 %) HIP1 (0.353 %) LATS2 (0.353 %) NCOA4 (0.353 %) NRIP1 (0.353 %) PTK2B (0.353 %) RPS6KA3 (0.353 %) ZMIZ1 (0.353 %) CTDSP1 (0.265 %) GSN (0.265 %) MAK (0.265 %) MED1 (0.265 %) PELP1 (0.265 %) PIAS4 (0.265 %) UBE3A (0…	0.0285037	0.0516351	0.00959295	0.00480803	0.00480803	0.0143549	0.00959295	0.00480803	0.0190939	0.0652487	0.00480803	0.0285037	0.0143549	0.00480803	0.0143549	0.00480803	0.0190939	0.00959295	0.00480803	0.00959295	0.00480803	0.00480803	0.0190939	0.0285037	0.0285037	0.0331746	0.0875053	0.109232	0.214144	0.0962588	0.0875053	0.078667	0.0470533	0.498026	0.0697431	0.217922	0.367367	0.251121	0.0516351
FGF8 Signaling Pathway(Mouse) ( FGF8 Signaling (Mouse) )// FGF8 Signaling Pathway(Xenopus) ( FGF8 Signaling (Xenopus) )	47	20	124306	58.8206	64	0.0366502	0.257039	31.9838	93.75	BRAF (0.795 %) KRAS (0.618 %) SOS1 (0.618 %) ETS2 (0.442 %) ETV5 (0.442 %) SOS2 (0.442 %) ARAF (0.353 %) ERG (0.353 %) ETS1 (0.265 %) FLI1 (0.265 %) FRS3 (0.265 %) NRAS (0.265 %) ELK1 (0.177 %) ELK4 (0.177 %) ETV6 (0.177 %) ELK3 (0.088 %) HRAS (0.088 %) RAF1 (0.088 %) SPI1 (0.088 %)	0.00896683	0.0163777	0.00299792	0.00150009	0.00150009	0.00449351	0.00299792	0.00150009	0.00598686	0.0207977	0.00150009	0.00896683	0.00449351	0.00150009	0.00449351	0.00150009	0.00598686	0.00299792	0.00150009	0.00299792	0.00150009	0.00150009	0.00598686	0.00896683	0.00896683	0.0104535	0.0281201	0.0353878	0.0723127	0.0310337	0.0281201	0.0251977	0.0149	0.193195	0.0222665	0.0737044	0.132912	0.0861353	0.0163777
MAP2K And MAPK Activation	78	38	264014	115.979	121	0.0184054	0.318824	39.4477	90.9091	TLN1 (1.325 %) VWF (1.237 %) BRAF (0.795 %) CNKSR2 (0.795 %) FGA (0.618 %) KRAS (0.618 %) ITGB3 (0.530 %) CNKSR1 (0.442 %) FN1 (0.442 %) IQGAP1 (0.442 %) ARAF (0.353 %) VCL (0.353 %) APBB1IP (0.265 %) FGG (0.265 %) ITGA2B (0.265 %) KSR2 (0.265 %) LAMTOR2 (0.265 %) NRAS (0.265 %) ARRB1 (0.177 %) IL17RD (0.177 %) KSR1 (0.177 %) MAPK1 (0.177 %) MAPK3 (0.177 %) MARK3 (0.177 %) RAP1B (0.177 %) WDR83 (…	0.0185399	0.0337271	0.00621857	0.00311413	0.00311413	0.00931334	0.00621857	0.00311413	0.0123985	0.0427263	0.00311413	0.0185399	0.00931334	0.00311413	0.00931334	0.00311413	0.0123985	0.00621857	0.00311413	0.00621857	0.00311413	0.00311413	0.0123985	0.0185399	0.0185399	0.0215963	0.0575391	0.0721228	0.144398	0.0633999	0.0575391	0.0516417	0.0307085	0.359827	0.0457074	0.147062	0.256439	0.170672	0.0337271
Glucagon Like Peptide 1 (GLP1) Regulates Insulin Secretion	354	42	248056	88.3134	92	0.0177614	0.352928	43.4221	94.5652	ITPR1 (1.325 %) ITPR3 (0.883 %) ITPR2 (0.795 %) ADCY8 (0.707 %) ADCY5 (0.618 %) IQGAP1 (0.442 %) KCNB1 (0.353 %) PRKAR1A (0.353 %) GLP1R (0.265 %) GNAS (0.265 %) GNB2 (0.265 %) GNB3 (0.265 %) KCNC2 (0.265 %) KCNG2 (0.265 %) RAPGEF4 (0.265 %) KCNS3 (0.177 %) PRKACA (0.177 %) PRKACG (0.177 %) ADCY6 (0.088 %) GCG (0.088 %) GNB1 (0.088 %) GNG10 (0.088 %) GNG11 (0.088 %) GNG4 (0.088 %) PRKAR2A (0.088 …	0.0137957	0.0251467	0.00461989	0.00231262	0.00231262	0.00692182	0.00461989	0.00231262	0.00921843	0.0318944	0.00231262	0.0137957	0.00692182	0.00231262	0.00692182	0.00231262	0.00921843	0.00461989	0.00231262	0.00461989	0.00231262	0.00231262	0.00921843	0.0137957	0.0137957	0.0160764	0.0430371	0.0540515	0.109315	0.0474581	0.0430371	0.0385955	0.022887	0.281858	0.0341333	0.111375	0.197444	0.1297	0.0251467
MTOR Signaling Pathway	83	66	458106	166.937	170	0.00789685	0.407021	49.6997	86.4706	AKT1 (2.739 %) MTOR (1.325 %) RB1CC1 (0.972 %) BRAF (0.795 %) RICTOR (0.707 %) KRAS (0.618 %) PPARGC1A (0.618 %) PLD1 (0.530 %) RPTOR (0.442 %) TSC1 (0.442 %) CLIP1 (0.353 %) EEF2 (0.353 %) EEF2K (0.353 %) EIF4A1 (0.353 %) IKBKB (0.353 %) PLD2 (0.353 %) RPS6KB1 (0.353 %) SGK1 (0.353 %) TSC2 (0.353 %) ULK2 (0.353 %) IRS1 (0.265 %) NRAS (0.265 %) RHEB (0.265 %) ATG13 (0.177 %) BTRC (0.177 %) CCNE1 …	0.0278554	0.0504747	0.00937272	0.00469739	0.00469739	0.0140261	0.00937272	0.00469739	0.0186576	0.0637928	0.00469739	0.0278554	0.0140261	0.00469739	0.0140261	0.00469739	0.0186576	0.00937272	0.00469739	0.00937272	0.00469739	0.00469739	0.0186576	0.0278554	0.0278554	0.032422	0.0855758	0.106852	0.209763	0.0941465	0.0855758	0.0769241	0.0459933	0.489982	0.0681905	0.213476	0.36065	0.246109	0.0504747
Validated Targets Of C MYC Transcriptional Repression	139	63	416109	150.088	153	0.00834507	0.408491	49.6997	86.2745	ERBB2 (1.502 %) BRCA1 (1.325 %) CDKN1B (0.883 %) ZFP36L1 (0.883 %) COL1A2 (0.707 %) EP300 (0.707 %) SMAD4 (0.618 %) CSDE1 (0.530 %) DNTT (0.530 %) HDAC1 (0.530 %) RBL1 (0.530 %) DNMT3A (0.442 %) ITGA6 (0.442 %) ITGB4 (0.442 %) SMAD2 (0.442 %) ITGB1 (0.353 %) TSC2 (0.353 %) HMGCS2 (0.265 %) PDGFRB (0.265 %) SLC11A1 (0.265 %) SP1 (0.265 %) CREB1 (0.177 %) HDAC3 (0.177 %) MYC (0.177 %) NDRG1 (0.177 …	0.0246895	0.0447979	0.00829852	0.00415791	0.00415791	0.0124219	0.00829852	0.00415791	0.0165282	0.0566633	0.00415791	0.0246895	0.0124219	0.00415791	0.0124219	0.00415791	0.0165282	0.00829852	0.00415791	0.00829852	0.00415791	0.00415791	0.0165282	0.0246895	0.0246895	0.0287448	0.0761125	0.0951606	0.18806	0.0837794	0.0761125	0.0683814	0.0408097	0.44889	0.0605856	0.191436	0.326875	0.221195	0.0447979
LPA Receptor Mediated Events	255	65	467078	182.62	184	0.00327031	0.466743	56.4733	86.413	AKT1 (2.739 %) ADCY9 (1.060 %) PIK3R1 (0.883 %) EGFR (0.795 %) ADCY8 (0.707 %) PIK3CB (0.707 %) ADCY5 (0.618 %) PLCG1 (0.618 %) ADCY7 (0.530 %) ARHGEF1 (0.530 %) JUN (0.530 %) LPAR4 (0.530 %) ADCY1 (0.442 %) LYN (0.442 %) PLCB3 (0.442 %) TIAM1 (0.442 %) GAB1 (0.353 %) LPAR1 (0.353 %) NFKB1 (0.353 %) PLD2 (0.353 %) PRKD1 (0.353 %) PTK2 (0.353 %) PTK2B (0.353 %) ADCY3 (0.265 %) BCAR1 (0.265 %) GNAO…	0.0308816	0.0558865	0.0104017	0.00521444	0.00521444	0.0155619	0.0104017	0.00521444	0.0206952	0.0705787	0.00521444	0.0308816	0.0155619	0.00521444	0.0155619	0.00521444	0.0206952	0.0104017	0.00521444	0.0104017	0.00521444	0.00521444	0.0206952	0.0308816	0.0308816	0.035935	0.0945594	0.117921	0.23003	0.103977	0.0945594	0.0850423	0.0509377	0.526506	0.0754251	0.234045	0.391445	0.269251	0.0558865
Cytokine Receptor Degradation Signaling ( JAK STAT Pathway And Regulation Pathway Diagram )// Negative Regulation Of (Phosphorylation Of Cytokine Receptor) In JAK STAT Pathway ( JAK STAT Pathway And Regulation Pathway Diagram )	224	41	216776	95.9566	97	0.0046967	0.470659	56.6342	88.6598	LIFR (0.707 %) IL1RAP (0.530 %) IL4R (0.530 %) IL6ST (0.530 %) IL10RB (0.442 %) IL13RA2 (0.442 %) IL1R2 (0.442 %) IL7R (0.442 %) CSF3R (0.353 %) EPOR (0.353 %) IL12RB1 (0.353 %) LEPR (0.353 %) OSMR (0.353 %) GHR (0.265 %) IL10RA (0.265 %) IL12RB2 (0.265 %) IL18R1 (0.265 %) IL3RA (0.265 %) CNTFR (0.177 %) CSF2RB (0.177 %) CXCR1 (0.177 %) IFNGR2 (0.177 %) IL15RA (0.177 %) IL1R1 (0.177 %) IL2RB (0.1…	0.0150853	0.0274823	0.00505392	0.00253016	0.00253016	0.00757129	0.00505392	0.00253016	0.0100823	0.0348455	0.00253016	0.0150853	0.00757129	0.00253016	0.00757129	0.00253016	0.0100823	0.00505392	0.00253016	0.00505392	0.00253016	0.00253016	0.0100823	0.0150853	0.0150853	0.0175773	0.0469939	0.0589893	0.118974	0.0518103	0.0469939	0.042153	0.0250155	0.303907	0.0372875	0.121203	0.213899	0.141013	0.0274823
PTK6 Regulates RHO GTPases// RAS GTPase And MAP Kinases	109	26	203379	92.5495	93	0.00210877	0.496645	59.4346	90.3226	NF1 (2.032 %) ARHGAP35 (0.795 %) RASAL2 (0.795 %) DAB2IP (0.618 %) KRAS (0.618 %) SYNGAP1 (0.442 %) ELMO2 (0.353 %) RASA2 (0.353 %) BCAR1 (0.265 %) ELMO1 (0.265 %) NRAS (0.265 %) RASA1 (0.265 %) RASA3 (0.265 %) RASAL1 (0.265 %) RASAL3 (0.265 %) SPRED1 (0.265 %) SPRED2 (0.265 %) DOCK1 (0.177 %) CRK (0.088 %) HRAS (0.088 %) RASA4 (0.088 %) RHOA (0.088 %) SPRED3 (0.088 %)	0.0145085	0.0264379	0.00485973	0.00243283	0.00243283	0.00728073	0.00485973	0.00243283	0.00969585	0.0335262	0.00243283	0.0145085	0.00728073	0.00243283	0.00728073	0.00243283	0.00969585	0.00485973	0.00243283	0.00485973	0.00243283	0.00243283	0.00969585	0.0145085	0.0145085	0.016906	0.0452254	0.056783	0.114665	0.0498654	0.0452254	0.0405628	0.0240636	0.294126	0.0358774	0.116819	0.206578	0.13597	0.0264379
SUMOylation Of DNA Damage Response And Repair Proteins	328	76	581162	226.03	226	-5.74664e-05	0.514202	61.2013	85.3982	BRCA1 (1.325 %) HERC2 (1.325 %) NUP160 (1.237 %) TPR (1.148 %) STAG2 (0.972 %) MDC1 (0.883 %) STAG1 (0.795 %) NUP153 (0.707 %) NUP214 (0.707 %) RANBP2 (0.707 %) NUP98 (0.618 %) NUP210 (0.530 %) NUP93 (0.530 %) SMC1A (0.530 %) SMC6 (0.530 %) SP100 (0.530 %) BLM (0.442 %) NUP107 (0.442 %) NUP205 (0.442 %) NUP155 (0.353 %) RAD21 (0.353 %) SMC3 (0.353 %) NDC1 (0.265 %) NSMCE4A (0.265 %) NUP188 (0.265…	0.0396771	0.0715361	0.0134046	0.00672491	0.00672491	0.0200393	0.0134046	0.00672491	0.0266295	0.090142	0.00672491	0.0396771	0.0200393	0.00672491	0.0200393	0.00672491	0.0266295	0.0134046	0.00672491	0.0134046	0.00672491	0.00672491	0.0266295	0.0396771	0.0396771	0.0461352	0.120327	0.14951	0.286363	0.132118	0.120327	0.108375	0.06525	0.618982	0.0962607	0.291162	0.473247	0.332928	0.0715361
ATM Pathway	305	34	268496	107.551	107	-0.00222884	0.539147	63.8234	86.9159	ATM (2.032 %) BRCA1 (1.325 %) MDC1 (0.883 %) ABL1 (0.530 %) FANCD2 (0.530 %) SMC1A (0.530 %) TP53BP1 (0.530 %) BLM (0.442 %) DCLRE1C (0.442 %) RAD50 (0.442 %) SMC3 (0.353 %) TERF2 (0.353 %) CHEK2 (0.265 %) RBBP8 (0.265 %) TOP3A (0.265 %) BID (0.177 %) CDC25C (0.177 %) MDM2 (0.177 %) RAD17 (0.177 %) TRIM28 (0.177 %) UIMC1 (0.177 %) XRCC4 (0.177 %) CDC25A (0.088 %) H2AFX (0.088 %) NBN (0.088 %) RAD…	0.017072	0.0310758	0.00572336	0.00286579	0.00286579	0.00857275	0.00572336	0.00286579	0.011414	0.0393822	0.00286579	0.017072	0.00857275	0.00286579	0.00857275	0.00286579	0.011414	0.00572336	0.00286579	0.00572336	0.00286579	0.00286579	0.011414	0.017072	0.017072	0.0198889	0.0530682	0.0665591	0.133675	0.0584878	0.0530682	0.0476173	0.0282911	0.336613	0.0421351	0.136158	0.238634	0.158184	0.0310758
Dual Incision In TC NER// Gap Filling DNA Repair Synthesis And Ligation In TC NER	311	66	383582	133.359	129	-0.0144328	0.677492	79.7693	89.1473	POLE (1.148 %) UBC (0.795 %) CUL4B (0.707 %) EP300 (0.707 %) ERCC5 (0.707 %) POLR2A (0.618 %) ERCC6 (0.530 %) DDB1 (0.442 %) POLD1 (0.353 %) RFC1 (0.353 %) RFC4 (0.353 %) USP7 (0.353 %) AQR (0.265 %) CCNH (0.265 %) ERCC2 (0.265 %) LIG3 (0.265 %) POLR2H (0.265 %) RFC5 (0.265 %) TCEA1 (0.265 %) XRCC1 (0.265 %) CDK7 (0.177 %) CUL4A (0.177 %) ERCC3 (0.177 %) ERCC4 (0.177 %) ERCC8 (0.177 %) LIG1 (0.17…	0.0216309	0.0392987	0.00726291	0.00363807	0.00363807	0.0108746	0.00726291	0.00363807	0.0144731	0.0497459	0.00363807	0.0216309	0.0108746	0.00363807	0.0108746	0.00363807	0.0144731	0.00726291	0.00363807	0.00726291	0.00363807	0.00363807	0.0144731	0.0216309	0.0216309	0.0251902	0.0669061	0.0837564	0.166595	0.0736831	0.0669061	0.0600795	0.0357909	0.406188	0.053203	0.169627	0.292662	0.196423	0.0392987
Regulation Of RAS By GAPs	117	67	397302	139.006	134	-0.0159274	0.696823	81.6066	92.5373	NF1 (2.032 %) RASAL2 (0.795 %) UBC (0.795 %) DAB2IP (0.618 %) KRAS (0.618 %) PSMD1 (0.442 %) SYNGAP1 (0.442 %) PSMA3 (0.353 %) PSMD2 (0.353 %) PSMD4 (0.353 %) RASA2 (0.353 %) NRAS (0.265 %) PSMB8 (0.265 %) PSMC4 (0.265 %) RASA1 (0.265 %) RASA3 (0.265 %) RASAL1 (0.265 %) RASAL3 (0.265 %) SPRED1 (0.265 %) SPRED2 (0.265 %) CUL3 (0.177 %) PSMA6 (0.177 %) PSMB6 (0.177 %) PSMC6 (0.177 %) PSMD11 (0.177 …	0.022654	0.0411398	0.00760908	0.0038118	0.0038118	0.0113919	0.00760908	0.0038118	0.0151603	0.052063	0.0038118	0.022654	0.0113919	0.0038118	0.0113919	0.0038118	0.0151603	0.00760908	0.0038118	0.00760908	0.0038118	0.0038118	0.0151603	0.022654	0.022654	0.0263794	0.0699925	0.0875829	0.17383	0.077069	0.0699925	0.0628618	0.0374708	0.420813	0.0556763	0.176979	0.304284	0.204787	0.0411398
Heterotrimeric GPCR Signaling Pathway (through G Alpha I And Pertussis Toxin) ( GPCR Signaling (pertussis Toxin) )// Heterotrimeric GPCR Signaling Pathway (through G Alpha Q// PLC Beta And ERK Cascade) ( GPCR Signaling (G Alpha Q) )// Heterotrimeric GPCR Signaling Pathway (through G Alpha S ACs Epac BRaf And ERKcascade) ( GPCR Signaling (G Alpha S// Epac And ERK) )// Heterotrimeric GPCR Signaling…	65	252	1029106	304.745	297	-0.0111807	0.724838	84.4359	73.4007	ADCY9 (1.060 %) PRKCQ (1.060 %) BRAF (0.795 %) PRKCB (0.795 %) ADCY8 (0.707 %) GRM3 (0.707 %) ADCY10 (0.618 %) ADCY5 (0.618 %) GRM1 (0.618 %) GRM5 (0.618 %) ADCY7 (0.530 %) GRM6 (0.530 %) GRM8 (0.530 %) PRKCZ (0.530 %) ADCY1 (0.442 %) GDF9 (0.442 %) GH1 (0.442 %) HGF (0.442 %) INHBA (0.442 %) WNT7A (0.442 %) ARAF (0.353 %) BDNF (0.353 %) BMP3 (0.353 %) FGF6 (0.353 %) FZD6 (0.353 %) GRM7 (0.353 %)…	0.0573551	0.10263	0.019496	0.00979598	0.00979598	0.029101	0.019496	0.00979598	0.0386119	0.128744	0.00979598	0.0573551	0.029101	0.00979598	0.029101	0.00979598	0.0386119	0.019496	0.00979598	0.019496	0.00979598	0.00979598	0.0386119	0.0573551	0.0573551	0.0665892	0.17059	0.210427	0.388728	0.186761	0.17059	0.154099	0.0937524	0.755302	0.137279	0.394716	0.607495	0.446036	0.10263
Integrin Linked Kinase Signaling	254	46	312994	127.005	121	-0.0210353	0.736878	85.049	94.2149	AKT1 (2.739 %) RICTOR (0.707 %) XPO1 (0.618 %) ZEB1 (0.618 %) JUN (0.530 %) PPP1R12A (0.530 %) DIAPH1 (0.442 %) IQGAP1 (0.442 %) TNS1 (0.442 %) ARHGEF6 (0.353 %) CKAP5 (0.353 %) ELMO2 (0.353 %) LIMS1 (0.353 %) ARHGEF7 (0.265 %) CDC37 (0.265 %) PARP1 (0.265 %) TACC3 (0.265 %) ACTN1 (0.177 %) CREB1 (0.177 %) CTNNB1 (0.177 %) RUVBL1 (0.177 %) SNAI1 (0.177 %) AURKA (0.088 %) CCND1 (0.088 %) GIT2 (0.0…	0.0204907	0.0372452	0.00687743	0.00344465	0.00344465	0.0102984	0.00687743	0.00344465	0.0137076	0.04716	0.00344465	0.0204907	0.0102984	0.00344465	0.0102984	0.00344465	0.0137076	0.00687743	0.00344465	0.00687743	0.00344465	0.00344465	0.0137076	0.0204907	0.0204907	0.0238648	0.0634583	0.0794779	0.158467	0.0698993	0.0634583	0.0569727	0.0339174	0.389474	0.0504422	0.161365	0.279497	0.187009	0.0372452
Regulation Of RAC1 Activity	260	39	337789	147.529	141	-0.0196578	0.741014	85.049	85.8156	PREX2 (1.33 %) PREX1 (1.15 %) KALRN (0.88 %) TRIO (0.88 %) DOCK2 (0.80 %) SPATA13 (0.71 %) SOS1 (0.62 %) ARHGAP9 (0.53 %) EPS8 (0.53 %) VAV3 (0.53 %) CHN2 (0.44 %) RASGRF1 (0.44 %) TIAM1 (0.44 %) ARHGAP17 (0.35 %) ARHGEF25 (0.35 %) ARHGEF6 (0.35 %) MCF2 (0.35 %) RASGRF2 (0.35 %) TIAM2 (0.35 %) ABR (0.27 %) ARHGAP32 (0.27 %) ARHGEF2 (0.27 %) ARHGEF7 (0.27 %) CHN1 (0.27 %) DOCK6 (0.27 %) ELMO1 (0.2…	0.0242162	0.0439478	0.00813812	0.00407737	0.00407737	0.0121823	0.00813812	0.00407737	0.01621	0.0555947	0.00407737	0.0242162	0.0121823	0.00407737	0.0121823	0.00407737	0.01621	0.00813812	0.00407737	0.00813812	0.00407737	0.00407737	0.01621	0.0242162	0.0242162	0.0281948	0.0746918	0.0934028	0.18477	0.0822221	0.0746918	0.0670998	0.0400337	0.44248	0.0594454	0.188094	0.321684	0.217407	0.0439478
Hedgehog Signaling Events Mediated By Gli Proteins	253	49	370263	145.634	139	-0.0202467	0.745255	85.049	92.8058	AKT1 (2.739 %) GLI3 (0.883 %) CREBBP (0.795 %) PTCH1 (0.618 %) SIN3B (0.618 %) XPO1 (0.618 %) GLI1 (0.530 %) HDAC1 (0.530 %) GLI2 (0.442 %) SIN3A (0.442 %) IFT88 (0.353 %) MTSS1 (0.353 %) GNAO1 (0.265 %) HDAC2 (0.265 %) IFT172 (0.265 %) KITLG (0.265 %) PRKCD (0.265 %) RBBP7 (0.265 %) SMO (0.265 %) BTRC (0.177 %) CSNK1E (0.177 %) CSNK1G3 (0.177 %) FOXA2 (0.177 %) GNAI1 (0.177 %) GNAI2 (0.177 %) KI…	0.023867	0.0433204	0.0080198	0.00401797	0.00401797	0.0120055	0.0080198	0.00401797	0.0159753	0.0548058	0.00401797	0.023867	0.0120055	0.00401797	0.0120055	0.00401797	0.0159753	0.0080198	0.00401797	0.0080198	0.00401797	0.00401797	0.0159753	0.023867	0.023867	0.027789	0.0736426	0.0921041	0.182336	0.0810718	0.0736426	0.0661534	0.0394609	0.437704	0.0586036	0.185621	0.31783	0.214601	0.0433204
TGF Beta Super Family Signaling Pathway(canonical) ( TGF Beta BMP Diagram(MolecularVariation) )	181	51	330075	132.493	126	-0.0218216	0.748873	85.049	89.6825	SMARCA4 (0.883 %) CREBBP (0.795 %) EP300 (0.707 %) ACVR1B (0.618 %) SMAD4 (0.618 %) BMPR2 (0.442 %) GDF9 (0.442 %) INHBA (0.442 %) MAML2 (0.442 %) MAML3 (0.442 %) SMAD2 (0.442 %) ACVR2A (0.353 %) AMHR2 (0.353 %) BMP3 (0.353 %) INHBB (0.353 %) BMP10 (0.265 %) BMP15 (0.265 %) BMPR1B (0.265 %) GDF2 (0.265 %) INHBE (0.265 %) MSTN (0.265 %) TGFBR2 (0.265 %) BMP2 (0.177 %) BMP4 (0.177 %) BMP6 (0.177 %)…	0.0214747	0.0390176	0.0072101	0.00361157	0.00361157	0.0107956	0.0072101	0.00361157	0.0143682	0.0493921	0.00361157	0.0214747	0.0107956	0.00361157	0.0107956	0.00361157	0.0143682	0.0072101	0.00361157	0.0072101	0.00361157	0.00361157	0.0143682	0.0214747	0.0214747	0.0250087	0.0664345	0.0831713	0.165486	0.0731656	0.0664345	0.0596545	0.0355344	0.403926	0.0528252	0.1685	0.290873	0.19514	0.0390176
Integrin Signaling Pathway ( Integrin Signaling Pathway )	72	123	1080793	376.233	367	-0.0107911	0.749519	85.049	67.5749	COL12A1 (1.502 %) TLN1 (1.325 %) COL7A1 (1.237 %) TNXB (1.148 %) DOCK10 (0.972 %) HSPG2 (0.972 %) TLN2 (0.972 %) TNC (0.972 %) COL19A1 (0.883 %) DOCK4 (0.883 %) VCAN (0.883 %) BRAF (0.795 %) COL15A1 (0.795 %) COL4A2 (0.795 %) COL4A5 (0.795 %) COL4A6 (0.795 %) COL5A1 (0.795 %) DOCK2 (0.795 %) COL1A2 (0.707 %) COL5A2 (0.707 %) DOCK3 (0.707 %) DOCK7 (0.707 %) COL18A1 (0.618 %) COL4A4 (0.618 %) DOCK8…	0.0756453	0.134293	0.025879	0.0130243	0.0130243	0.0385663	0.025879	0.0130243	0.0510884	0.16768	0.0130243	0.0756453	0.0385663	0.0130243	0.0385663	0.0130243	0.0510884	0.025879	0.0130243	0.025879	0.0130243	0.0130243	0.0510884	0.0756453	0.0756453	0.0876844	0.220489	0.269947	0.480815	0.240662	0.220489	0.19978	0.122869	0.846601	0.178521	0.487577	0.712186	0.544607	0.134293
BMP Signaling Pathway ( TGF Beta BMP Diagram(MolecularVariation) )	220	34	245283	98.1607	92	-0.0281497	0.765155	86.0882	92.3913	SMARCA4 (0.883 %) CREBBP (0.795 %) EP300 (0.707 %) SMAD4 (0.618 %) BMPR2 (0.442 %) GDF9 (0.442 %) MAML2 (0.442 %) MAML3 (0.442 %) SMAD2 (0.442 %) BMP3 (0.353 %) BMP10 (0.265 %) BMP15 (0.265 %) BMPR1B (0.265 %) GDF2 (0.265 %) MSTN (0.265 %) BMP2 (0.177 %) BMP4 (0.177 %) BMP6 (0.177 %) GDF5 (0.177 %) GDF6 (0.177 %) MAML1 (0.177 %) SMAD3 (0.177 %) SMAD9 (0.177 %) WT1 (0.177 %) BMP5 (0.088 %) GDF3 (0…	0.0154601	0.0281607	0.00518015	0.00259344	0.00259344	0.00776015	0.00518015	0.00259344	0.0103335	0.0357024	0.00259344	0.0154601	0.00776015	0.00259344	0.00776015	0.00259344	0.0103335	0.00518015	0.00259344	0.00518015	0.00259344	0.00259344	0.0103335	0.0154601	0.0154601	0.0180134	0.0481419	0.060421	0.121764	0.0530727	0.0481419	0.0431855	0.0256338	0.310193	0.0382032	0.124042	0.218622	0.144277	0.0281607
Noncanonical Wnt Signaling Pathway	278	33	210070	85.8324	80	-0.0305611	0.766539	86.0882	95	SETDB1 (0.883 %) CHD7 (0.795 %) ROCK1 (0.618 %) DAAM1 (0.530 %) FLNA (0.530 %) PRKCZ (0.530 %) FZD6 (0.353 %) NFATC2 (0.353 %) DVL3 (0.265 %) ROR2 (0.265 %) TAB2 (0.265 %) YES1 (0.265 %) CAMK2A (0.177 %) DVL1 (0.177 %) FZD7 (0.177 %) MAPK10 (0.177 %) MAPK8 (0.177 %) PPARG (0.177 %) WNT5A (0.177 %) ARRB2 (0.088 %) FZD2 (0.088 %) FZD5 (0.088 %) MAP3K7 (0.088 %) NLK (0.088 %) RHOA (0.088 %) WNT3A (0…	0.0133806	0.0243942	0.00448023	0.00224263	0.00224263	0.00671282	0.00448023	0.00224263	0.0089404	0.0309432	0.00224263	0.0133806	0.00671282	0.00224263	0.00671282	0.00224263	0.0089404	0.00448023	0.00224263	0.00448023	0.00224263	0.00224263	0.0089404	0.0133806	0.0133806	0.0155932	0.0417608	0.0524576	0.106186	0.0460539	0.0417608	0.0374483	0.0222013	0.274618	0.0331165	0.10819	0.192078	0.12603	0.0243942
Warburg Effect	374	45	216985	74.7171	69	-0.0345707	0.776141	86.7219	97.1014	PC (0.530 %) PKLR (0.442 %) ACO1 (0.353 %) G6PD (0.353 %) HK2 (0.353 %) SLC16A1 (0.353 %) ACO2 (0.265 %) GPI (0.265 %) IDH3B (0.265 %) PGK1 (0.265 %) ALDOB (0.177 %) CS (0.177 %) DHTKD1 (0.177 %) DLD (0.177 %) DLST (0.177 %) ENO1 (0.177 %) IDH1 (0.177 %) IDH3G (0.177 %) PDHA1 (0.177 %) PGD (0.177 %) PGLS (0.177 %) TKT (0.177 %) GAPDH (0.088 %) IDH3A (0.088 %) MPC1 (0.088 %) PDHB (0.088 %) PGAM2 (…	0.0115409	0.0210565	0.00386187	0.0019328	0.0019328	0.0057872	0.00386187	0.0019328	0.00770882	0.0267219	0.0019328	0.0115409	0.0057872	0.0019328	0.0057872	0.0019328	0.00770882	0.00386187	0.0019328	0.00386187	0.0019328	0.0019328	0.00770882	0.0115409	0.0115409	0.0134514	0.0360914	0.0453706	0.0922022	0.0398138	0.0360914	0.0323544	0.0191608	0.241686	0.028603	0.0939568	0.167893	0.109596	0.0210565
Glycolysis / Gluconeogenesis	356	49	209810	83.9062	77	-0.0373034	0.806123	89.6146	94.8052	OGDHL (0.442 %) PKLR (0.442 %) GCK (0.353 %) HK2 (0.353 %) HK3 (0.353 %) OGDH (0.353 %) PCK2 (0.353 %) PGM1 (0.353 %) ADH7 (0.265 %) GPI (0.265 %) NME5 (0.265 %) NME7 (0.265 %) PFKP (0.265 %) ADPGK (0.177 %) ALDOC (0.177 %) DLD (0.177 %) ENO1 (0.177 %) ENO3 (0.177 %) G6PC2 (0.177 %) HK1 (0.177 %) NME6 (0.177 %) TPI1 (0.177 %) ADH1A (0.088 %) ADH1B (0.088 %) ADH5 (0.088 %) ADH6 (0.088 %) AKR1A1 (0…	0.0130594	0.0238119	0.00437222	0.00218851	0.00218851	0.00655116	0.00437222	0.00218851	0.00872533	0.030207	0.00218851	0.0130594	0.00655116	0.00218851	0.00655116	0.00218851	0.00872533	0.00437222	0.00218851	0.00437222	0.00218851	0.00218851	0.00872533	0.0130594	0.0130594	0.0152193	0.0407727	0.0512232	0.103758	0.0449666	0.0407727	0.0365603	0.0216708	0.268969	0.0323294	0.10572	0.187903	0.123181	0.0238119
EPH Ephrin Mediated Repulsion Of Cells	247	48	291890	124.704	116	-0.031422	0.818827	90.5672	90.5172	EPHA7 (0.707 %) EPHA3 (0.618 %) EPHA5 (0.618 %) EPHB2 (0.618 %) DNM1 (0.530 %) EPHB1 (0.530 %) VAV3 (0.530 %) AP2A1 (0.442 %) AP2A2 (0.442 %) LYN (0.442 %) TIAM1 (0.442 %) AP2M1 (0.353 %) EPHA2 (0.353 %) EPHB3 (0.353 %) EPHB6 (0.353 %) AP2B1 (0.265 %) APH1B (0.265 %) CLTC (0.265 %) CLTCL1 (0.265 %) EPHA1 (0.265 %) EPHA6 (0.265 %) MMP2 (0.265 %) PSEN2 (0.265 %) YES1 (0.265 %) EFNB2 (0.177 %) EPHA4…	0.0200807	0.0365063	0.00673888	0.00337514	0.00337514	0.0100913	0.00673888	0.00337514	0.0134323	0.0462291	0.00337514	0.0200807	0.0100913	0.00337514	0.0100913	0.00337514	0.0134323	0.00673888	0.00337514	0.00673888	0.00337514	0.00337514	0.0134323	0.0200807	0.0200807	0.0233881	0.0622164	0.0779356	0.155527	0.068536	0.0622164	0.0558539	0.0332433	0.383354	0.0494482	0.158377	0.274707	0.1836	0.0365063
Insulin/IGF Pathway Mitogen Activated Protein Kinase Kinase/MAP Kinase Cascade	70	29	221320	98.3434	89	-0.0433552	0.859792	94.6203	92.1348	INSRR (1.060 %) IRS4 (0.795 %) SOS1 (0.618 %) IGF2R (0.530 %) INSR (0.530 %) SOS2 (0.442 %) IGF1R (0.353 %) RPS6KA2 (0.353 %) RPS6KA3 (0.353 %) RPS6KA5 (0.353 %) RPS6KA6 (0.353 %) RPS6KB1 (0.353 %) RPS6KB2 (0.353 %) IGF1 (0.265 %) IRS1 (0.265 %) RASA1 (0.265 %) ELK1 (0.177 %) MAP2K3 (0.177 %) MAPK1 (0.177 %) MAPK3 (0.177 %) RPS6KA1 (0.177 %) MAP2K1 (0.088 %) MAP2K2 (0.088 %) RAF1 (0.088 %) RPS6KA…	0.0154912	0.0282171	0.00519064	0.00259869	0.00259869	0.00777584	0.00519064	0.00259869	0.0103543	0.0357735	0.00259869	0.0154912	0.00777584	0.00259869	0.00777584	0.00259869	0.0103543	0.00519064	0.00259869	0.00519064	0.00259869	0.00259869	0.0103543	0.0154912	0.0154912	0.0180497	0.0482372	0.0605398	0.121996	0.0531775	0.0482372	0.0432712	0.0256851	0.310713	0.0382792	0.124277	0.219013	0.144547	0.0282171
Insulin Processing	361	26	170405	73.9408	64	-0.0627041	0.903921	98.1195	87.5	MYO5A (0.795 %) KIF5A (0.618 %) KIF5B (0.530 %) EXOC7 (0.442 %) EXOC2 (0.353 %) EXOC6 (0.353 %) KIF5C (0.353 %) SLC30A5 (0.353 %) CPN1 (0.265 %) ERO1A (0.265 %) ERO1B (0.265 %) EXOC1 (0.265 %) EXOC3 (0.265 %) PCSK2 (0.265 %) SLC30A8 (0.265 %) EXOC4 (0.177 %) EXOC5 (0.177 %) CPE (0.088 %) PCSK1 (0.088 %) RAB27A (0.088 %) SLC30A6 (0.088 %)	0.0114137	0.0208255	0.00381912	0.00191139	0.00191139	0.00572321	0.00381912	0.00191139	0.00762366	0.0264295	0.00191139	0.0114137	0.00572321	0.00191139	0.00572321	0.00191139	0.00762366	0.00381912	0.00191139	0.00381912	0.00191139	0.00191139	0.00762366	0.0114137	0.0114137	0.0133032	0.0356984	0.044879	0.0912278	0.0393811	0.0356984	0.0320015	0.0189503	0.239356	0.0282904	0.0929649	0.166195	0.108449	0.0208255
SMAD2/SMAD3:SMAD4 Heterotrimer Regulates Transcription	173	32	206492	90.9839	80	-0.0558744	0.90478	98.1195	95	UBC (0.795 %) SMAD4 (0.618 %) HDAC1 (0.530 %) RBL1 (0.530 %) SMAD2 (0.442 %) ATP1B4 (0.353 %) E2F4 (0.353 %) MEN1 (0.353 %) TFDP2 (0.353 %) CCNT1 (0.265 %) RNF111 (0.265 %) SERPINE1 (0.265 %) SP1 (0.265 %) TFDP1 (0.265 %) CCNC (0.177 %) CCNT2 (0.177 %) CDK8 (0.177 %) E2F5 (0.177 %) MYC (0.177 %) SMAD3 (0.177 %) TGIF2 (0.177 %) CCNK (0.088 %) JUNB (0.088 %) SMAD7 (0.088 %) SNW1 (0.088 %) UBA52 (0.…	0.0142445	0.0259597	0.00477088	0.00238829	0.00238829	0.00714778	0.00477088	0.00238829	0.009519	0.032922	0.00238829	0.0142445	0.00714778	0.00238829	0.00714778	0.00238829	0.009519	0.00477088	0.00238829	0.00477088	0.00238829	0.00238829	0.009519	0.0142445	0.0142445	0.0165987	0.0444153	0.055772	0.112687	0.0489743	0.0444153	0.0398344	0.0236279	0.289605	0.0352316	0.114806	0.203206	0.133652	0.0259597
HIF 2 Alpha Transcription Factor Network	272	34	214648	79.453	69	-0.0612614	0.907552	98.1195	97.1014	CREBBP (0.795 %) EP300 (0.707 %) ABCG2 (0.353 %) EPAS1 (0.353 %) KDR (0.353 %) ARNT (0.265 %) ETS1 (0.265 %) FLT1 (0.265 %) MMP14 (0.265 %) PGK1 (0.265 %) POU5F1 (0.265 %) SERPINE1 (0.265 %) SP1 (0.265 %) ADORA2A (0.177 %) CITED2 (0.177 %) EGLN2 (0.177 %) ELK1 (0.177 %) SIRT1 (0.177 %) SLC11A2 (0.177 %) APEX1 (0.088 %) BHLHE40 (0.088 %) EGLN1 (0.088 %) EIF3E (0.088 %) EPO (0.088 %) SLC2A1 (0.088 …	0.0123207	0.0224719	0.00412389	0.00206407	0.00206407	0.00617945	0.00412389	0.00206407	0.00823076	0.0285125	0.00206407	0.0123207	0.00617945	0.00206407	0.00617945	0.00206407	0.00823076	0.00412389	0.00206407	0.00412389	0.00206407	0.00206407	0.00823076	0.0123207	0.0123207	0.0143593	0.0384973	0.0483795	0.0981529	0.0424624	0.0384973	0.0345158	0.0204501	0.255816	0.0305177	0.100014	0.178226	0.116596	0.0224719
Negative Regulators Of RIG I/MDA5 Signaling	202	34	193867	81.6845	71	-0.0608814	0.90951	98.1195	95.7746	UBC (0.795 %) ITCH (0.442 %) HERC5 (0.353 %) IFIH1 (0.353 %) MAVS (0.353 %) PCBP2 (0.353 %) TBK1 (0.353 %) UBA7 (0.353 %) IRF3 (0.265 %) NLRC5 (0.265 %) RNF135 (0.265 %) TAX1BP1 (0.265 %) TRAF3 (0.265 %) TRIM25 (0.265 %) UBE2D2 (0.265 %) IKBKE (0.177 %) RNF125 (0.177 %) TNFAIP3 (0.177 %) ATG5 (0.088 %) CYLD (0.088 %) DDX58 (0.088 %) NLRX1 (0.088 %) OTUD5 (0.088 %) RNF216 (0.088 %) UBA52 (0.088 %)…	0.0126902	0.0231423	0.00424809	0.0021263	0.0021263	0.00636536	0.00424809	0.0021263	0.00847813	0.0293603	0.0021263	0.0126902	0.00636536	0.0021263	0.00636536	0.0021263	0.00847813	0.00424809	0.0021263	0.00424809	0.0021263	0.0021263	0.00847813	0.0126902	0.0126902	0.0147895	0.0396359	0.0498027	0.100961	0.0437156	0.0396359	0.0355388	0.0210607	0.262423	0.0314242	0.102872	0.18308	0.119895	0.0231423
MHC Class II Antigen Presentation	200	102	835314	223.908	207	-0.0340994	0.918628	98.3652	80.1932	DYNC2H1 (1.590 %) DYNC1H1 (1.502 %) CENPE (1.060 %) KIF4A (0.883 %) DNM3 (0.707 %) SEC31A (0.707 %) KIF2B (0.618 %) KIF5A (0.618 %) DNM1 (0.530 %) KIF2A (0.530 %) KIF4B (0.530 %) KIF5B (0.530 %) SEC24A (0.530 %) SPTBN2 (0.530 %) AP2A1 (0.442 %) AP2A2 (0.442 %) DYNC1I1 (0.442 %) SEC13 (0.442 %) AP1G1 (0.353 %) AP2M1 (0.353 %) DYNC1LI2 (0.353 %) KIF2C (0.353 %) KIF3B (0.353 %) KIF3C (0.353 %) KLC4 …	0.0392323	0.0707476	0.0132523	0.00664825	0.00664825	0.0198124	0.0132523	0.00664825	0.026329	0.0891584	0.00664825	0.0392323	0.0198124	0.00664825	0.0198124	0.00664825	0.026329	0.0132523	0.00664825	0.0132523	0.00664825	0.00664825	0.026329	0.0392323	0.0392323	0.0456198	0.119036	0.147934	0.283604	0.130711	0.119036	0.107204	0.0645284	0.614754	0.0952139	0.288367	0.469371	0.329832	0.0707476
Activated NOTCH1 Transmits Signal To The Nucleus	265	30	176194	81.242	70	-0.0646823	0.92077	98.3652	91.4286	UBC (0.795 %) CNTN1 (0.618 %) MIB1 (0.530 %) ITCH (0.442 %) NOTCH1 (0.442 %) DNER (0.353 %) DTX1 (0.353 %) APH1B (0.265 %) DLK1 (0.265 %) DLL1 (0.265 %) DTX2 (0.265 %) JAG1 (0.265 %) PSEN2 (0.265 %) ARRB1 (0.177 %) DLL4 (0.177 %) DTX4 (0.177 %) NCSTN (0.177 %) NEURL1 (0.177 %) NUMB (0.177 %) ADAM10 (0.088 %) ADAM17 (0.088 %) APH1A (0.088 %) ARRB2 (0.088 %) JAG2 (0.088 %) MIB2 (0.088 %) PSENEN (0.…	0.0126168	0.0230091	0.00422342	0.00211394	0.00211394	0.00632843	0.00422342	0.00211394	0.008429	0.029192	0.00211394	0.0126168	0.00632843	0.00211394	0.00632843	0.00211394	0.008429	0.00422342	0.00211394	0.00422342	0.00211394	0.00211394	0.008429	0.0126168	0.0126168	0.0147041	0.0394098	0.0495202	0.100404	0.0434668	0.0394098	0.0353357	0.0209395	0.261116	0.0312442	0.102305	0.182118	0.119241	0.0230091
DNA Damage Recognition In GG NER	310	38	193949	78.9434	66	-0.0777717	0.949942	100	92.4242	UBC (0.795 %) CUL4B (0.707 %) INO80 (0.530 %) COPS3 (0.442 %) DDB1 (0.442 %) MCRS1 (0.353 %) ACTB (0.265 %) PARP1 (0.265 %) XPC (0.265 %) CUL4A (0.177 %) INO80D (0.177 %) RAD23B (0.177 %) RUVBL1 (0.177 %) TFPT (0.177 %) ACTL6A (0.088 %) ACTR8 (0.088 %) CETN2 (0.088 %) COPS2 (0.088 %) COPS4 (0.088 %) COPS5 (0.088 %) COPS6 (0.088 %) COPS7B (0.088 %) COPS8 (0.088 %) DDB2 (0.088 %) GPS1 (0.088 %) INO…	0.0122365	0.0223191	0.00409558	0.00204989	0.00204989	0.00613708	0.00409558	0.00204989	0.00817439	0.0283192	0.00204989	0.0122365	0.00613708	0.00204989	0.00613708	0.00204989	0.00817439	0.00409558	0.00204989	0.00409558	0.00204989	0.00204989	0.00817439	0.0122365	0.0122365	0.0142613	0.0382377	0.0480549	0.097512	0.0421767	0.0382377	0.0342825	0.0203109	0.254303	0.0303111	0.099362	0.177116	0.115842	0.0223191
Negative Regulation Of MAPK Pathway	87	38	220828	95.1337	76	-0.097521	0.987305	100	96.0526	BRAF (0.795 %) UBC (0.795 %) KRAS (0.618 %) DUSP16 (0.442 %) ARAF (0.353 %) DUSP10 (0.265 %) NRAS (0.265 %) PPP2CB (0.265 %) PPP2R5D (0.265 %) BRAP (0.177 %) DUSP7 (0.177 %) KSR1 (0.177 %) MAPK1 (0.177 %) MAPK3 (0.177 %) MARK3 (0.177 %) PPP2CA (0.177 %) PPP2R1A (0.177 %) PPP2R5B (0.177 %) PPP2R5E (0.177 %) DUSP1 (0.088 %) DUSP4 (0.088 %) DUSP6 (0.088 %) DUSP9 (0.088 %) HRAS (0.088 %) PAQR3 (0.088…	0.0149457	0.0272296	0.00500691	0.0025066	0.0025066	0.00750096	0.00500691	0.0025066	0.00998876	0.0345263	0.0025066	0.0149457	0.00750096	0.0025066	0.00750096	0.0025066	0.00998876	0.00500691	0.0025066	0.00500691	0.0025066	0.0025066	0.00998876	0.0149457	0.0149457	0.0174148	0.0465661	0.0584557	0.117933	0.0513398	0.0465661	0.0417683	0.0247851	0.301551	0.0369464	0.120144	0.212133	0.139795	0.0272296
EPHB Mediated Forward Signaling	249	42	323822	128.945	107	-0.0810204	0.987504	100	93.4579	GRIN2B (0.972 %) KALRN (0.883 %) EPHB2 (0.618 %) ROCK1 (0.618 %) EPHB1 (0.530 %) LIMK1 (0.442 %) LYN (0.442 %) ROCK2 (0.442 %) TIAM1 (0.442 %) ACTG1 (0.353 %) EPHB3 (0.353 %) EPHB6 (0.353 %) PTK2 (0.353 %) ACTB (0.265 %) ARHGEF28 (0.265 %) ITSN1 (0.265 %) RASA1 (0.265 %) SDC2 (0.265 %) YES1 (0.265 %) ACTR2 (0.177 %) ARPC2 (0.177 %) EFNB2 (0.177 %) EPHB4 (0.177 %) GRIN1 (0.177 %) ARPC1A (0.088 %) …	0.0208376	0.0378701	0.00699466	0.00350347	0.00350347	0.0104736	0.00699466	0.00350347	0.0139404	0.0479471	0.00350347	0.0208376	0.0104736	0.00350347	0.0104736	0.00350347	0.0139404	0.00699466	0.00350347	0.00699466	0.00350347	0.00350347	0.0139404	0.0208376	0.0208376	0.024268	0.0645081	0.080781	0.160947	0.0710516	0.0645081	0.0579186	0.0344875	0.394606	0.0512826	0.163886	0.283526	0.189884	0.0378701
Rho GTPase Cycle	261	122	1020247	344.934	311	-0.0449762	0.992879	100	73.955	OBSCN (1.855 %) MYO9A (1.148 %) DLC1 (1.060 %) ARHGAP5 (0.883 %) KALRN (0.883 %) TRIO (0.883 %) AKAP13 (0.795 %) ARHGAP31 (0.795 %) ARHGAP35 (0.795 %) SRGAP1 (0.795 %) STARD8 (0.795 %) FAM13B (0.707 %) MYO9B (0.707 %) ARHGEF11 (0.618 %) OCRL (0.618 %) PLEKHG2 (0.618 %) SOS1 (0.618 %) A2M (0.530 %) ARAP2 (0.530 %) ARAP3 (0.530 %) ARHGAP9 (0.530 %) ARHGEF4 (0.530 %) ARHGEF9 (0.530 %) VAV3 (0.530 %)…	0.0673503	0.119997	0.0229738	0.0115537	0.0115537	0.0342621	0.0229738	0.0115537	0.0454199	0.150148	0.0115537	0.0673503	0.0342621	0.0115537	0.0342621	0.0115537	0.0454199	0.0229738	0.0115537	0.0229738	0.0115537	0.0115537	0.0454199	0.0673503	0.0673503	0.0781258	0.198121	0.243386	0.440687	0.216543	0.198121	0.179266	0.109711	0.810202	0.159967	0.447149	0.668454	0.50205	0.119997
APC/C:Cdc20 Mediated Degradation Of Securin// APC/C:Cdh1 Mediated Degradation Of Cdc20 And Other APC/C:Cdh1 Targeted Proteins In Late Mitosis/early G1// Autodegradation Of Cdh1 By Cdh1:APC/C// Cdc20:Phospho APC/C Mediated Degradation Of Cyclin A	144	77	374303	116.662	92	-0.103142	0.995817	100	88.0435	UBC (0.795 %) ANAPC5 (0.530 %) CCNA2 (0.442 %) MAD2L1 (0.442 %) PSMD1 (0.442 %) ANAPC1 (0.353 %) ANAPC7 (0.353 %) PSMA3 (0.353 %) PSMD2 (0.353 %) PSMD4 (0.353 %) ANAPC4 (0.265 %) PSMB8 (0.265 %) PSMC4 (0.265 %) PTTG1 (0.265 %) BUB3 (0.177 %) PSMA6 (0.177 %) PSMB6 (0.177 %) PSMC6 (0.177 %) PSMD11 (0.177 %) PSMD12 (0.177 %) PSMD5 (0.177 %) PSMD6 (0.177 %) PSMD7 (0.177 %) ANAPC10 (0.088 %) ANAPC2 (0…	0.0186598	0.0339433	0.00625902	0.00313442	0.00313442	0.00937382	0.00625902	0.00313442	0.0124789	0.042999	0.00313442	0.0186598	0.00937382	0.00313442	0.00937382	0.00313442	0.0124789	0.00625902	0.00313442	0.00625902	0.00313442	0.00313442	0.0124789	0.0186598	0.0186598	0.0217357	0.0579035	0.0725759	0.145268	0.0638001	0.0579035	0.0519697	0.0309058	0.361687	0.0459986	0.147947	0.257875	0.171684	0.0339433
NRAGE Signals Death Through JNK	257	45	442727	186.226	154	-0.0825194	0.997759	100	86.3636	OBSCN (1.855 %) KALRN (0.883 %) TRIO (0.883 %) AKAP13 (0.795 %) ARHGEF11 (0.618 %) PLEKHG2 (0.618 %) SOS1 (0.618 %) ARHGEF4 (0.530 %) ARHGEF9 (0.530 %) VAV3 (0.530 %) MAGED1 (0.442 %) MCF2L (0.442 %) SOS2 (0.442 %) TIAM1 (0.442 %) ARHGEF6 (0.353 %) ECT2 (0.353 %) FGD1 (0.353 %) MCF2 (0.353 %) RASGRF2 (0.353 %) TIAM2 (0.353 %) ABR (0.265 %) ARHGEF12 (0.265 %) ARHGEF2 (0.265 %) ARHGEF7 (0.265 %) BC…	0.0315885	0.0571487	0.0106424	0.00533542	0.00533542	0.015921	0.0106424	0.00533542	0.0211715	0.0721599	0.00533542	0.0315885	0.015921	0.00533542	0.015921	0.00533542	0.0211715	0.0106424	0.00533542	0.0106424	0.00533542	0.00533542	0.0211715	0.0315885	0.0315885	0.0367554	0.0966493	0.120492	0.234698	0.106263	0.0966493	0.086932	0.0520913	0.53467	0.0771103	0.238782	0.398436	0.274564	0.0571487
MAPK6/MAPK4 Signaling	82	90	573633	196.615	163	-0.0814301	0.998162	100	88.3436	KALRN (0.883 %) NCOA3 (0.883 %) UBC (0.795 %) AGO4 (0.707 %) MAPK4 (0.618 %) TNRC6B (0.618 %) XPO1 (0.618 %) AGO1 (0.530 %) AGO2 (0.530 %) JUN (0.530 %) RAG1 (0.530 %) PSMD1 (0.442 %) TNRC6C (0.442 %) MAPK6 (0.353 %) PAK2 (0.353 %) PSMA3 (0.353 %) PSMD2 (0.353 %) PSMD4 (0.353 %) TNRC6A (0.353 %) AGO3 (0.265 %) MMP2 (0.265 %) MOV10 (0.265 %) PAK3 (0.265 %) PSMB8 (0.265 %) PSMC4 (0.265 %) RAG2 (0.2…	0.0336488	0.0608229	0.0113445	0.00568841	0.00568841	0.0169684	0.0113445	0.00568841	0.0225602	0.0767592	0.00568841	0.0336488	0.0169684	0.00568841	0.0169684	0.00568841	0.0225602	0.0113445	0.00568841	0.0113445	0.00568841	0.00568841	0.0225602	0.0336488	0.0336488	0.0391458	0.102721	0.127953	0.248161	0.1129	0.102721	0.0924251	0.0554499	0.557699	0.082011	0.252438	0.418383	0.28985	0.0608229
Downregulation Of TGF Beta Receptor Signaling	225	26	188270	81.6117	57	-0.155878	0.999083	100	89.4737	UBC (0.795 %) XPO1 (0.618 %) NEDD4L (0.530 %) MTMR4 (0.442 %) SMAD2 (0.442 %) USP15 (0.353 %) ZFYVE9 (0.353 %) PMEPA1 (0.265 %) TGFBR2 (0.265 %) PPP1R15A (0.177 %) SMAD3 (0.177 %) SMURF1 (0.177 %) SMURF2 (0.177 %) TGFB1 (0.177 %) TGFBR1 (0.177 %) BAMBI (0.088 %) SMAD7 (0.088 %) STRAP (0.088 %) UBA52 (0.088 %) UCHL5 (0.088 %)	0.0126781	0.0231204	0.00424403	0.00212427	0.00212427	0.00635928	0.00424403	0.00212427	0.00847004	0.0293326	0.00212427	0.0126781	0.00635928	0.00212427	0.00635928	0.00212427	0.00847004	0.00424403	0.00212427	0.00424403	0.00212427	0.00212427	0.00847004	0.0126781	0.0126781	0.0147755	0.0395987	0.0497562	0.100869	0.0436747	0.0395987	0.0355054	0.0210408	0.262208	0.0313946	0.102779	0.182922	0.119787	0.0231204
Interferon Alpha/beta Signaling	228	67	332128	127.649	93	-0.137534	0.999835	100	90.3226	ADAR (0.442 %) JAK1 (0.442 %) TYK2 (0.442 %) IFNA2 (0.353 %) MX2 (0.353 %) OAS2 (0.353 %) HLA-E (0.265 %) IRF3 (0.265 %) IRF9 (0.265 %) OAS1 (0.265 %) OAS3 (0.265 %) OASL (0.265 %) PSMB8 (0.265 %) RNASEL (0.265 %) STAT2 (0.265 %) HLA-A (0.177 %) HLA-F (0.177 %) HLA-G (0.177 %) IFI35 (0.177 %) IFITM3 (0.177 %) IFNA14 (0.177 %) IFNA4 (0.177 %) IFNA6 (0.177 %) IRF6 (0.177 %) MX1 (0.177 %) PTPN11 (0.…	0.0206057	0.0374524	0.0069163	0.00346415	0.00346415	0.0103565	0.0069163	0.00346415	0.0137848	0.047421	0.00346415	0.0206057	0.0103565	0.00346415	0.0103565	0.00346415	0.0137848	0.0069163	0.00346415	0.0069163	0.00346415	0.00346415	0.0137848	0.0206057	0.0206057	0.0239985	0.0638065	0.0799101	0.15929	0.0702815	0.0638065	0.0572864	0.0341064	0.39118	0.0507209	0.162202	0.280836	0.187963	0.0374524
Trk Receptor Signaling Mediated By The MAPK Pathway	137	34	221130	88.2808	59	-0.175014	0.999837	100	96.6102	BRAF (0.795 %) KRAS (0.618 %) RPS6KA5 (0.353 %) MAP2K5 (0.265 %) MEF2C (0.265 %) NRAS (0.265 %) PRKCD (0.265 %) RUSC1 (0.265 %) CREB1 (0.177 %) ELK1 (0.177 %) MAP2K3 (0.177 %) MAPK1 (0.177 %) MAPK14 (0.177 %) MAPK3 (0.177 %) RAP1B (0.177 %) RPS6KA1 (0.177 %) CDK5 (0.088 %) EGR1 (0.088 %) EHD4 (0.088 %) HRAS (0.088 %) MAP2K1 (0.088 %) MAP2K6 (0.088 %) NTF3 (0.088 %) RAF1 (0.088 %) RIT1 (0.088 %) S…	0.0137903	0.0251368	0.00461805	0.0023117	0.0023117	0.00691907	0.00461805	0.0023117	0.00921477	0.0318819	0.0023117	0.0137903	0.00691907	0.0023117	0.00691907	0.0023117	0.00921477	0.00461805	0.0023117	0.00461805	0.0023117	0.0023117	0.00921477	0.0137903	0.0137903	0.0160701	0.0430203	0.0540305	0.109274	0.0474397	0.0430203	0.0385804	0.022878	0.281763	0.0341199	0.111333	0.197373	0.129652	0.0251368
Negative Regulation Of (transcription By R Smad:smad4) In TGF Beta Super Family Signaling Pathway ( TGF Beta Super Family Signaling Pathway(canonical) )	159	21	210376	94.5339	61	-0.190258	0.999969	100	95.082	SMAD4 (0.618 %) HDAC1 (0.530 %) HDAC9 (0.530 %) HDAC6 (0.442 %) SMAD2 (0.442 %) TLE3 (0.442 %) HDAC5 (0.353 %) HDAC8 (0.353 %) TLE1 (0.353 %) HDAC2 (0.265 %) SKIL (0.265 %) HDAC3 (0.177 %) HDAC4 (0.177 %) SMAD3 (0.177 %) SMAD9 (0.177 %) SMAD1 (0.088 %) SMAD5 (0.088 %) TLE2 (0.088 %) TLE4 (0.088 %)	0.014844	0.0270456	0.00497269	0.00248944	0.00248944	0.00744976	0.00497269	0.00248944	0.00992065	0.0342938	0.00248944	0.014844	0.00744976	0.00248944	0.00744976	0.00248944	0.00992065	0.00497269	0.00248944	0.00497269	0.00248944	0.00248944	0.00992065	0.014844	0.014844	0.0172965	0.0462545	0.058067	0.117174	0.0509972	0.0462545	0.0414881	0.0246174	0.299832	0.0366979	0.119372	0.210845	0.138907	0.0270456
SnoN Degradation Signaling ( TGF Beta Super Family Signaling Pathway(canonical) )// TGF Beta Receptor Complex Degradation Signaling ( TGF Beta Super Family Signaling Pathway(canonical) )// TGF Beta Receptor I Degradation Signaling ( TGF Beta Super Family Signaling Pathway(canonical) )	237	51	324185	116.431	79	-0.168442	0.999976	100	86.0759	ACVR1B (0.618 %) BMPR2 (0.442 %) PSMD1 (0.442 %) SMAD2 (0.442 %) ACVR2A (0.353 %) AMHR2 (0.353 %) PSMA3 (0.353 %) PSMD2 (0.353 %) PSMD4 (0.353 %) BMPR1B (0.265 %) PSMB8 (0.265 %) PSMC4 (0.265 %) SKIL (0.265 %) TGFBR2 (0.265 %) PSMA6 (0.177 %) PSMB6 (0.177 %) PSMD11 (0.177 %) PSMD12 (0.177 %) PSMD5 (0.177 %) PSMD6 (0.177 %) PSMD7 (0.177 %) SMURF1 (0.177 %) SMURF2 (0.177 %) TGFBR1 (0.177 %) ACVR1 (…	0.0186192	0.0338702	0.00624533	0.00312756	0.00312756	0.00935336	0.00624533	0.00312756	0.0124517	0.0429067	0.00312756	0.0186192	0.00935336	0.00312756	0.00935336	0.00312756	0.0124517	0.00624533	0.00312756	0.00624533	0.00312756	0.00312756	0.0124517	0.0186192	0.0186192	0.0216886	0.0577802	0.0724226	0.144974	0.0636647	0.0577802	0.0518588	0.0308391	0.361058	0.0459001	0.147648	0.257389	0.171342	0.0338702
TGF Beta Receptor Signaling	177	53	386804	156.952	113	-0.14269	0.999986	100	90.2655	SPTBN1 (0.795 %) SMAD4 (0.618 %) SOS1 (0.618 %) ZFYVE16 (0.618 %) NEDD4L (0.530 %) DAB2 (0.442 %) ITCH (0.442 %) SMAD2 (0.442 %) RPS6KB1 (0.353 %) ZFYVE9 (0.353 %) AXIN1 (0.265 %) CTGF (0.265 %) EIF2A (0.265 %) PPP2CB (0.265 %) RNF111 (0.265 %) TAB2 (0.265 %) TFAP2B (0.265 %) TGFBR2 (0.265 %) YAP1 (0.265 %) CAMK2A (0.177 %) CTNNB1 (0.177 %) DAXX (0.177 %) GRB2 (0.177 %) PPP1R15A (0.177 %) PPP2CA …	0.0259689	0.0470937	0.00873232	0.00437574	0.00437574	0.0130698	0.00873232	0.00437574	0.0173884	0.059548	0.00437574	0.0259689	0.0130698	0.00437574	0.0130698	0.00437574	0.0173884	0.00873232	0.00437574	0.00873232	0.00437574	0.00437574	0.0173884	0.0259689	0.0259689	0.030231	0.0799446	0.0998988	0.196893	0.0879788	0.0799446	0.0718396	0.0429057	0.465863	0.0636632	0.200407	0.34072	0.231351	0.0470937
Interferon Gamma Signaling	229	88	703713	196.223	135	-0.162417	1	100	85.9259	JAK2 (0.618 %) GBP4 (0.530 %) MID1 (0.530 %) SP100 (0.530 %) JAK1 (0.442 %) NCAM1 (0.442 %) VCAM1 (0.442 %) CAMK2D (0.353 %) GBP3 (0.353 %) GBP5 (0.353 %) GBP6 (0.353 %) GBP7 (0.353 %) OAS2 (0.353 %) TRIM10 (0.353 %) TRIM38 (0.353 %) TRIM46 (0.353 %) B2M (0.265 %) HLA-E (0.265 %) IRF3 (0.265 %) IRF9 (0.265 %) OAS1 (0.265 %) OAS3 (0.265 %) OASL (0.265 %) PRKCD (0.265 %) TRIM21 (0.265 %) TRIM25 (0.…	0.0335704	0.0606833	0.0113177	0.00567498	0.00567498	0.0169285	0.0113177	0.00567498	0.0225074	0.0765845	0.00567498	0.0335704	0.0169285	0.00567498	0.0169285	0.00567498	0.0225074	0.0113177	0.00567498	0.0113177	0.00567498	0.00567498	0.0225074	0.0335704	0.0335704	0.0390549	0.102491	0.12767	0.247653	0.112648	0.102491	0.0922165	0.0553222	0.556844	0.0818248	0.251922	0.417635	0.289274	0.0606833
[truncated: 1,093 more columns]

## Sheet: COREAD
Pathway	Internal Id	n.genes.in.rep	total Exonic Content Block length	(E)xpected n.mut in path	(O)bserved n.mut in path	log10 (oddRatio=(O/E))	pval	% FDR	ExclusiveCoverage	Mutated Genes	prob TCGA-A6-2670-01	prob TCGA-A6-2671-01	prob TCGA-A6-2672-01	prob TCGA-A6-2674-01	prob TCGA-A6-2676-01	prob TCGA-A6-2677-01	prob TCGA-A6-2678-01	prob TCGA-A6-2683-01	prob TCGA-A6-3807-01	prob TCGA-A6-3808-01	prob TCGA-A6-3809-01	prob TCGA-A6-3810-01	prob TCGA-A6-4105-01	prob TCGA-A6-5656-01	prob TCGA-A6-5657-01	prob TCGA-A6-5659-01	prob TCGA-A6-5660-01	prob TCGA-A6-5661-01	prob TCGA-A6-5662-01	prob TCGA-A6-5664-01	prob TCGA-A6-5665-01	prob TCGA-A6-5666-01	prob TCGA-A6-6137-01	prob TCGA-A6-6138-01	prob TCGA-A6-6141-01	prob TCGA-A6-6142-01	prob TCGA-A6-6648-01	prob TCGA-A6-6649-01	prob TCGA-A6-6651-01	prob TCGA-A6-6652-01	prob TCGA-A6-6653-01	prob TCGA-A6-6654-01	prob TCGA-A6-6780-01	prob TCGA-A6-6781-01	prob TCGA-A6-6782-01	prob TCGA-AA-3489-01	prob TCGA-AA-3492-01	prob TCGA-AA-3496-01	prob TCGA-AA-3502-01
CDC42 Signaling Events	13	71	528189	257.207	468	0.259962	0	0	27.9915	APC (83.44 %) PIK3CA (41.92 %) BRAF (21.06 %) CTNNB1 (18.81 %) CDH1 (17.59 %) PIK3R1 (10.22 %) CBL ( 7.98 %) MTOR ( 7.98 %) MAP2K4 ( 6.95 %) TIAM1 ( 6.95 %) CDC42BPA ( 6.34 %) IQGAP1 ( 5.52 %) CTNNA1 ( 4.91 %) ARHGEF7 ( 4.50 %) IQGAP3 ( 4.50 %) RASGRF1 ( 4.50 %) VAV2 ( 3.89 %) DIAPH3 ( 3.68 %) PAX6 ( 3.68 %) PLD1 ( 3.48 %) GSK3B ( 3.27 %) WASL ( 3.27 %) ARHGEF6 ( 2.86 %) MAPK8 ( 2.86 %) MAPK9 ( 2…	0.113167	0.339586	0.881695	0.103432	0.948119	0.255311	0.283231	0.313861	0.310105	0.384829	0.972608	0.394822	0.647491	0.445439	0.606824	0.71509	0.676974	0.997279	0.513537	0.317596	0.999889	0.687383	0.46623	0.500076	0.983057	0.394822	0.45146	0.513537	0.524045	0.45146	0.994406	0.625674	0.994645	0.999744	0.546864	0.414323	0.999852	0.719718	0.566227
Direct P53 Effectors	152	141	809720	309.901	478	0.188206	0	0	15.0628	APC (83.44 %) TP53 (61.76 %) PTEN (38.24 %) RB1 (20.65 %) EGFR (16.56 %) CREBBP (14.31 %) MLH1 (11.25 %) TRRAP (10.84 %) MET (10.02 %) EP300 ( 9.20 %) VCAN ( 8.59 %) MSH2 ( 7.36 %) SMARCA4 ( 6.95 %) NLRC4 ( 5.32 %) APAF1 ( 5.11 %) HTT ( 4.50 %) MAP4K4 ( 4.50 %) PRDM1 ( 4.50 %) TP63 ( 4.29 %) COL18A1 ( 3.89 %) TSC2 ( 3.48 %) BAX ( 3.27 %) POU4F2 ( 3.27 %) BCL6 ( 3.07 %) MMP2 ( 3.07 %) DROSHA ( 2.8…	0.165923	0.465679	0.960225	0.152052	0.98855	0.359386	0.39532	0.433926	0.429238	0.519999	0.995637	0.531729	0.793022	0.589614	0.755907	0.849947	0.818607	0.999867	0.663306	0.438575	0.999999	0.827364	0.612634	0.649132	0.997889	0.531729	0.596327	0.663306	0.674231	0.596327	0.999604	0.773368	0.999629	0.999996	0.697535	0.554335	0.999998	0.853614	0.716846
Canonical Wnt Signaling Pathway	267	21	133013	115.223	434	0.575949	1.03109e-15	1.9268e-12	66.5899	APC (83.44 %) CTNNB1 (18.81 %) LRP6 ( 4.91 %) GSK3B ( 3.27 %) DVL2 ( 2.25 %) GRK5 ( 2.25 %) PPP2R5A ( 2.04 %) AXIN1 ( 1.84 %) DVL3 ( 1.84 %) CUL3 ( 1.64 %) GSK3A ( 1.23 %) PI4K2A ( 1.23 %) RANBP3 ( 1.02 %) KLHL12 ( 0.82 %) NKD2 ( 0.82 %) PIP5K1B ( 0.82 %) WNT3A ( 0.82 %) CSNK1G1 ( 0.61 %) DVL1 ( 0.61 %) CAV1 ( 0.41 %)	0.0289218	0.096415	0.40643	0.0263275	0.514723	0.0695033	0.078152	0.0879377	0.0867202	0.11195	0.58485	0.115497	0.224926	0.134176	0.203968	0.264219	0.241294	0.763877	0.161457	0.0891536	0.891947	0.247343	0.142223	0.155846	0.630834	0.115497	0.136483	0.161457	0.16592	0.136483	0.718413	0.213469	0.721402	0.867481	0.175874	0.122548	0.884031	0.267158	0.184623
Downstream Signaling In Na√Øve CD8+ T Cells	25	69	304446	191.594	394	0.313113	1.13115e-15	1.9268e-12	40.8629	KRAS (44.38 %) PIK3CA (41.92 %) BRAF (21.06 %) NRAS ( 8.18 %) PRKCB ( 5.11 %) B2M ( 3.68 %) HLA-A ( 3.68 %) CD3G ( 3.27 %) PRKCQ ( 3.27 %) NFATC3 ( 3.07 %) EOMES ( 2.86 %) MAPK8 ( 2.86 %) MAPK9 ( 2.66 %) NFATC1 ( 2.66 %) RAF1 ( 2.66 %) EGR1 ( 2.45 %) NFATC2 ( 2.45 %) STAT4 ( 2.25 %) IFNA2 ( 2.04 %) TNFRSF9 ( 2.04 %) IL2RG ( 1.84 %) MAP2K1 ( 1.84 %) IFNA1 ( 1.64 %) IFNAR1 ( 1.64 %) PRKCA ( 1.64 %)…	0.065823	0.209601	0.701843	0.0600226	0.813155	0.153909	0.172042	0.192291	0.189787	0.240771	0.869917	0.247788	0.446304	0.28413	0.410948	0.509261	0.473055	0.964872	0.335378	0.194787	0.994272	0.48275	0.299473	0.325013	0.900931	0.247788	0.288548	0.335378	0.343555	0.288548	0.947146	0.427129	0.948439	0.990803	0.361588	0.261628	0.993251	0.513797	0.3772
Signaling Events Mediated By Hepatocyte Growth Factor Receptor (c Met)	262	80	551119	258.954	461	0.250478	1.21754e-15	1.9268e-12	29.9349	APC (83.44 %) PIK3CA (41.92 %) CTNNB1 (18.81 %) CDH1 (17.59 %) PIK3R1 (10.22 %) MET (10.02 %) PTPN11 ( 8.18 %) CBL ( 7.98 %) MTOR ( 7.98 %) MAP2K4 ( 6.95 %) CTNNA1 ( 4.91 %) PRKCI ( 4.50 %) RPTOR ( 4.50 %) PTK2 ( 4.09 %) PLCG1 ( 3.89 %) RAPGEF1 ( 3.89 %) GAB1 ( 3.27 %) PTPRJ ( 3.27 %) WASL ( 3.27 %) INPPL1 ( 3.07 %) SOS1 ( 3.07 %) MAPK8 ( 2.86 %) HGF ( 2.66 %) INPP5D ( 2.66 %) PAK1 ( 2.66 %) RAF1…	0.114672	0.343448	0.885212	0.104815	0.950245	0.258409	0.286598	0.317505	0.313716	0.389041	0.973967	0.399104	0.65265	0.450042	0.611979	0.720103	0.682095	0.997497	0.518468	0.321273	0.999902	0.692481	0.470947	0.504953	0.984006	0.399104	0.456098	0.518468	0.529015	0.456098	0.994802	0.630839	0.995027	0.999772	0.551907	0.418737	0.999869	0.724714	0.57132
P53 Pathway Feedback Loops 2	164	42	307798	195.901	462	0.372605	1.42879e-15	1.9268e-12	20.7792	TP53 (61.76 %) KRAS (44.38 %) PIK3CA (41.92 %) PTEN (38.24 %) ATM (32.52 %) RB1 (20.65 %) CTNNB1 (18.81 %) PIK3R1 (10.22 %) ATR ( 9.41 %) NRAS ( 8.18 %) PIK3CG ( 6.95 %) PIK3C3 ( 5.32 %) PIK3C2A ( 4.70 %) PIK3C2B ( 4.50 %) PIK3C2G ( 4.50 %) TP63 ( 4.29 %) RBL1 ( 3.68 %) CCNA1 ( 3.27 %) AKT1 ( 2.25 %) PIK3CD ( 2.25 %) AKT3 ( 1.84 %) AKT2 ( 1.64 %) MAPK14 ( 1.64 %) CCNE1 ( 1.23 %) TP73 ( 1.23 %) CC…	0.0684408	0.217227	0.716348	0.0624175	0.825636	0.159717	0.17846	0.199368	0.196784	0.249342	0.880405	0.256564	0.459631	0.293924	0.423657	0.523449	0.486786	0.969401	0.346474	0.201944	0.99537	0.496614	0.309673	0.335859	0.909935	0.256564	0.29846	0.346474	0.354844	0.29846	0.953178	0.440132	0.95437	0.992419	0.373287	0.2708	0.994508	0.528034	0.389237
Trk Receptor Signaling Mediated By PI3K And PLC Gamma	136	36	228615	164.191	373	0.356358	1.49114e-15	1.9268e-12	44.7721	KRAS (44.38 %) PIK3CA (41.92 %) PIK3R1 (10.22 %) NRAS ( 8.18 %) TRPC3 ( 4.70 %) PLCG1 ( 3.89 %) GAB1 ( 3.27 %) GSK3B ( 3.27 %) SOS1 ( 3.07 %) NTRK1 ( 2.86 %) PRKCD ( 2.86 %) EPB41L1 ( 2.66 %) EGR1 ( 2.45 %) SHC1 ( 2.45 %) AKT1 ( 2.25 %) GRB2 ( 2.25 %) AGAP2 ( 2.04 %) CAMK4 ( 2.04 %) STAT5A ( 1.84 %) NGF ( 1.23 %) YWHAH ( 1.02 %) CAMK2A ( 0.82 %) FOXO3 ( 0.82 %) HRAS ( 0.82 %) PDPK1 ( 0.82 %) SRC …	0.0505803	0.16415	0.602468	0.0460898	0.72161	0.11962	0.13404	0.150231	0.148224	0.189397	0.788762	0.195114	0.362769	0.224931	0.33198	0.418786	0.386375	0.922133	0.267598	0.152233	0.98046	0.395001	0.237626	0.258907	0.828365	0.195114	0.228579	0.267598	0.274477	0.228579	0.893682	0.346015	0.89567	0.971965	0.28972	0.206427	0.977857	0.422885	0.303001
Insulin Receptor Signaling ( Insulin Receptor Signaling (D. Melanogaster) )// Insulin Receptor Signaling (Mammal) ( Insulin Receptor Signaling (Mammal) )	69	62	435972	230.433	401	0.2406	1.56991e-15	1.9268e-12	34.9127	KRAS (44.38 %) PIK3CA (41.92 %) BRAF (21.06 %) PIK3R1 (10.22 %) NRAS ( 8.18 %) MTOR ( 7.98 %) IRS4 ( 6.13 %) IRS1 ( 4.50 %) RPTOR ( 4.50 %) INSR ( 4.29 %) TSC2 ( 3.48 %) GSK3B ( 3.27 %) PRKAA2 ( 3.27 %) PPP2R3A ( 3.07 %) SOS1 ( 3.07 %) PPP2R1A ( 2.86 %) SOS2 ( 2.86 %) RAF1 ( 2.66 %) PPP2R2C ( 2.45 %) SHC1 ( 2.45 %) AKT1 ( 2.25 %) GRB2 ( 2.25 %) PIK3CD ( 2.25 %) PPP2R2B ( 2.25 %) ARAF ( 2.04 %) PP…	0.0918064	0.28299	0.8194	0.0838209	0.906746	0.210509	0.234333	0.26068	0.257437	0.322651	0.94412	0.331487	0.566576	0.376704	0.526922	0.634595	0.595892	0.991227	0.438861	0.263909	0.999325	0.606367	0.395513	0.426444	0.961984	0.331487	0.382137	0.438861	0.4486	0.382137	0.984366	0.545197	0.984904	0.998682	0.4699	0.348816	0.999149	0.639362	0.488141
TP53 Regulates Transcription Of Caspase Activators And Caspases	184	12	84046	87.0821	375	0.634102	1.57133e-15	1.9268e-12	62.9333	TP53 (61.76 %) ATM (32.52 %) NLRC4 ( 5.32 %) APAF1 ( 5.11 %) TP63 ( 4.29 %) CASP2 ( 1.64 %) CASP10 ( 1.43 %) CASP1 ( 1.23 %) PIDD1 ( 1.23 %) TP73 ( 1.23 %) CRADD ( 0.82 %) CASP6 ( 0.61 %)	0.0193395	0.0652384	0.293254	0.017597	0.381911	0.0468041	0.0527086	0.059412	0.0585766	0.0759634	0.442884	0.0784209	0.155953	0.0914175	0.140834	0.184674	0.167856	0.617288	0.11057	0.0602465	0.772511	0.172277	0.0970457	0.106613	0.484747	0.0784209	0.0930291	0.11057	0.113722	0.0930291	0.569711	0.147671	0.572755	0.739418	0.120774	0.0833163	0.761552	0.186842	0.126996
Recruitment And ATM Mediated Phosphorylation Of Repair And Signaling Proteins At DNA Double Strand Breaks	326	75	382049	206.686	397	0.283479	1.63218e-15	1.9268e-12	45.5919	TP53 (61.76 %) ATM (32.52 %) HERC2 ( 9.00 %) ABL1 ( 6.34 %) BRCA1 ( 6.34 %) CHEK2 ( 5.73 %) RAD50 ( 4.70 %) BAZ1B ( 4.29 %) TP53BP1 ( 4.09 %) EYA1 ( 3.48 %) MDC1 ( 3.48 %) BRE ( 2.86 %) EYA4 ( 2.86 %) MAPK8 ( 2.86 %) APBB1 ( 2.66 %) SMARCA5 ( 2.45 %) BARD1 ( 2.25 %) NBN ( 2.25 %) RNF168 ( 2.04 %) UIMC1 ( 1.84 %) EYA2 ( 1.64 %) FAM175A ( 1.64 %) KDM4A ( 1.64 %) KDM4B ( 1.64 %) PPP5C ( 1.64 %) RNF8…	0.075275	0.236887	0.751142	0.0686726	0.854563	0.174767	0.195062	0.217646	0.214858	0.271373	0.904077	0.279107	0.493094	0.318991	0.455716	0.558758	0.521139	0.978697	0.374718	0.220424	0.997351	0.531251	0.335739	0.363498	0.929859	0.279107	0.323819	0.374718	0.383552	0.323819	0.965931	0.472866	0.966887	0.995434	0.402975	0.29433	0.996801	0.563441	0.419726
ErbB2/ErbB3 Signaling Events	37	41	294955	192.288	399	0.317022	1.7674e-15	1.9268e-12	33.8346	KRAS (44.38 %) PIK3CA (41.92 %) NF2 (13.70 %) PIK3R1 (10.22 %) JAK2 ( 9.82 %) NRAS ( 8.18 %) PTPN11 ( 8.18 %) MTOR ( 7.98 %) ERBB2 ( 7.36 %) NRG1 ( 6.13 %) ERBB3 ( 5.93 %) DOCK7 ( 3.89 %) MAPK10 ( 3.48 %) SOS1 ( 3.07 %) USP8 ( 3.07 %) MAPK8 ( 2.86 %) MAPK9 ( 2.66 %) RAF1 ( 2.66 %) NFATC4 ( 2.45 %) SHC1 ( 2.45 %) AKT1 ( 2.25 %) GRB2 ( 2.25 %) PPP3CB ( 2.04 %) STAT3 ( 2.04 %) CHRNA1 ( 1.84 %) MAP2K…	0.0662401	0.21082	0.7042	0.0604041	0.815199	0.154836	0.173067	0.193421	0.190905	0.242142	0.871646	0.249192	0.448447	0.285698	0.412989	0.511547	0.475265	0.965635	0.337156	0.19593	0.994463	0.484982	0.301106	0.326751	0.902422	0.249192	0.290135	0.337156	0.345365	0.290135	0.948156	0.429218	0.949432	0.991082	0.363464	0.263095	0.993469	0.516091	0.379132
Apoptotic Cleavage Of Cellular Proteins	335	18	122473	112.9	431	0.581784	1.83052e-15	1.9268e-12	72.6218	APC (83.44 %) CLSPN ( 6.95 %) ROCK1 ( 5.52 %) ACIN1 ( 4.29 %) PTK2 ( 4.09 %) CASP8 ( 3.68 %) PRKCQ ( 3.27 %) SATB1 ( 3.27 %) PRKCD ( 2.86 %) BIRC2 ( 1.84 %) STK26 ( 1.64 %) BMX ( 1.43 %) STK24 ( 1.43 %) FNTA ( 1.23 %) CASP3 ( 0.82 %) CASP6 ( 0.61 %) CASP7 ( 0.61 %) BCAP31 ( 0.20 %)	0.0280568	0.0936314	0.396962	0.0255391	0.50396	0.0674675	0.0758733	0.0853871	0.0842033	0.108745	0.573628	0.112197	0.218911	0.130383	0.19844	0.257338	0.234911	0.753307	0.156966	0.0865694	0.884401	0.240826	0.138222	0.151495	0.619502	0.112197	0.13263	0.156966	0.161316	0.13263	0.707375	0.207718	0.710388	0.859102	0.171024	0.119061	0.876198	0.260215	0.179558
IGF1 Signaling Pathway ( IGF1 Signaling Pathway )	67	27	170670	139.65	385	0.44042	1.83369e-15	1.9268e-12	43.3766	KRAS (44.38 %) PIK3CA (41.92 %) BRAF (21.06 %) PIK3R1 (10.22 %) NRAS ( 8.18 %) IRS1 ( 4.50 %) IGF1R ( 4.29 %) SOS1 ( 3.07 %) SOS2 ( 2.86 %) RAF1 ( 2.66 %) SHC1 ( 2.45 %) GRB2 ( 2.25 %) PIK3CD ( 2.25 %) ARAF ( 2.04 %) IGFBP3 ( 1.64 %) IGF1 ( 1.23 %) PIK3CB ( 1.02 %) HRAS ( 0.82 %) SHC3 ( 0.82 %) IGFBP2 ( 0.61 %) IGFBP4 ( 0.61 %) KLK3 ( 0.61 %) PIK3R2 ( 0.61 %) SHC2 ( 0.61 %) IGFBP6 ( 0.41 %) IGFBP…	0.038881	0.128027	0.505799	0.0354097	0.623563	0.0927524	0.104128	0.116955	0.115362	0.148223	0.695142	0.152817	0.29128	0.176902	0.265263	0.339393	0.311429	0.857783	0.211752	0.118545	0.950546	0.318836	0.187223	0.204615	0.73986	0.152817	0.179864	0.211752	0.217415	0.179864	0.819579	0.277087	0.822162	0.934841	0.230008	0.16193	0.945589	0.342956	0.241033
Class I PI3K Signaling Events	16	46	307204	196.636	391	0.298513	1.84777e-15	1.9268e-12	31.202	KRAS (44.38 %) PIK3CA (41.92 %) PTEN (38.24 %) PIK3R1 (10.22 %) NRAS ( 8.18 %) PIK3CG ( 6.95 %) ARAP3 ( 4.91 %) ITK ( 4.91 %) PLCG2 ( 4.50 %) PLCG1 ( 3.89 %) FYN ( 3.48 %) HCK ( 3.27 %) INPPL1 ( 3.07 %) INPP5D ( 2.66 %) RHOA ( 2.45 %) ZAP70 ( 2.45 %) AKT1 ( 2.25 %) BTK ( 2.04 %) LYN ( 2.04 %) HSP90AA1 ( 1.84 %) LCK ( 1.84 %) SGK1 ( 1.84 %) YES1 ( 1.84 %) BLK ( 1.64 %) SYK ( 1.64 %) CYTH3 ( 1.43 %…	0.068894	0.218541	0.718791	0.0628321	0.827714	0.16072	0.179567	0.200589	0.197991	0.250818	0.882136	0.258075	0.461909	0.295609	0.425832	0.525867	0.489131	0.970124	0.348379	0.203179	0.995538	0.49898	0.311427	0.337722	0.911411	0.258075	0.300165	0.348379	0.356782	0.300165	0.954151	0.442357	0.955326	0.992669	0.375293	0.272379	0.9947	0.53046	0.3913
Integrated Breast Cancer Pathway	71	90	641037	283.112	445	0.196402	1.86198e-15	1.9268e-12	23.1461	TP53 (61.76 %) PTEN (38.24 %) ATM (32.52 %) SMAD4 (29.45 %) BRAF (21.06 %) NF1 (21.06 %) RB1 (20.65 %) CTNNB1 (18.81 %) EGFR (16.56 %) ATR ( 9.41 %) BMPR2 ( 8.59 %) MSH2 ( 7.36 %) SMARCA4 ( 6.95 %) BRCA1 ( 6.34 %) ZMYND8 ( 5.93 %) CHEK2 ( 5.73 %) FILIP1 ( 5.52 %) AR ( 5.32 %) JAKMIP1 ( 5.11 %) BLM ( 4.91 %) HIPK2 ( 4.91 %) TPR ( 4.91 %) CHUK ( 4.70 %) SMAD2 ( 4.70 %) JAK1 ( 4.09 %) MYT1 ( 4.09 %)…	0.137069	0.399067	0.927202	0.125426	0.973534	0.303614	0.335524	0.370207	0.365973	0.4492	0.987917	0.460162	0.721929	0.515046	0.68205	0.785879	0.7502	0.99929	0.587089	0.374413	0.999986	0.760044	0.537268	0.57302	0.9933	0.460162	0.521502	0.587089	0.59801	0.521502	0.998281	0.700658	0.998371	0.999961	0.621536	0.481436	0.99998	0.790141	0.641291
Negative Regulation Of MAPK Pathway	87	38	220828	160.17	337	0.323048	1.94482e-15	1.9268e-12	64.3917	KRAS (44.38 %) BRAF (21.06 %) NRAS ( 8.18 %) KSR1 ( 3.68 %) PPP2R1A ( 2.86 %) RAF1 ( 2.66 %) DUSP16 ( 2.25 %) ARAF ( 2.04 %) PPP2R5A ( 2.04 %) DUSP9 ( 1.84 %) MARK3 ( 1.84 %) DUSP7 ( 1.64 %) PPP5C ( 1.64 %) DUSP1 ( 1.43 %) DUSP6 ( 1.43 %) PPP2R5E ( 1.43 %) UBC ( 1.43 %) DUSP10 ( 1.23 %) PPP2R5B ( 1.23 %) PPP2R5D ( 1.23 %) DUSP4 ( 1.02 %) PAQR3 ( 1.02 %) BRAP ( 0.82 %) HRAS ( 0.82 %) PPP2R1B ( 0.8…	0.0485412	0.157932	0.587018	0.0442275	0.7065	0.114972	0.128873	0.144494	0.142557	0.182331	0.774741	0.18786	0.350789	0.216725	0.320747	0.405602	0.373863	0.913467	0.258109	0.146427	0.977008	0.382303	0.229028	0.249672	0.815396	0.18786	0.22026	0.258109	0.264791	0.22026	0.883362	0.334434	0.885453	0.967502	0.279606	0.198807	0.97408	0.409622	0.292523
Integrin Signaling Pathway ( Integrin Signaling Pathway )	72	123	1080793	350.514	433	0.0917826	2.02164e-15	1.9268e-12	23.0947	KRAS (44.38 %) BRAF (21.06 %) COL12A1 (11.66 %) COL11A1 (10.63 %) FN1 ( 9.41 %) VCAN ( 8.59 %) DOCK2 ( 8.18 %) NRAS ( 8.18 %) TNXB ( 8.18 %) COL7A1 ( 7.98 %) COL5A1 ( 7.36 %) TNC ( 6.95 %) MCF2 ( 6.75 %) COL3A1 ( 6.54 %) COL4A5 ( 6.34 %) ACAN ( 6.13 %) DOCK5 ( 5.93 %) DOCK1 ( 5.52 %) COL1A2 ( 5.32 %) DOCK10 ( 5.32 %) DOCK3 ( 5.32 %) COL4A4 ( 5.11 %) DOCK8 ( 4.91 %) COL4A1 ( 4.70 %) COL5A2 ( 4.70 …	0.220651	0.577348	0.988094	0.202787	0.997849	0.457686	0.499042	0.542457	0.537243	0.635241	0.999429	0.647433	0.885175	0.705896	0.855967	0.926192	0.904216	0.999995	0.775926	0.547613	1	0.910512	0.728323	0.762864	0.999789	0.647433	0.712486	0.775926	0.785856	0.712486	0.999979	0.869932	0.999981	1	0.806619	0.670607	1	0.928659	0.823378
Regulation Of TP53 Activity Through Phosphorylation	170	89	524830	254.129	414	0.211946	2.02464e-15	1.9268e-12	35.9903	TP53 (61.76 %) ATM (32.52 %) TAF1L (11.45 %) ATR ( 9.41 %) STK11 ( 7.16 %) BRCA1 ( 6.34 %) CHEK2 ( 5.73 %) BLM ( 4.91 %) HIPK2 ( 4.91 %) RAD50 ( 4.70 %) TAF1 ( 4.70 %) TAF2 ( 4.29 %) TOPBP1 ( 4.29 %) TOP3A ( 3.68 %) WRN ( 3.48 %) BRIP1 ( 3.27 %) CCNA1 ( 3.27 %) PRKAA2 ( 3.27 %) SSRP1 ( 3.07 %) HIPK1 ( 2.86 %) NUAK1 ( 2.86 %) RBBP8 ( 2.86 %) SUPT16H ( 2.86 %) CHEK1 ( 2.45 %) TAF5 ( 2.45 %) BARD1 (…	0.110551	0.33283	0.875335	0.101027	0.944213	0.249906	0.277352	0.307491	0.303793	0.377453	0.970081	0.38732	0.638358	0.437359	0.597716	0.706177	0.667894	0.996855	0.504861	0.311169	0.999861	0.678337	0.457946	0.491501	0.981275	0.38732	0.44332	0.504861	0.515296	0.44332	0.993647	0.616541	0.993912	0.999686	0.537978	0.406586	0.999816	0.710834	0.557248
TGF Beta Receptor	176	220	1547821	391.745	460	0.069754	2.04406e-15	1.9268e-12	16.3043	TP53 (61.76 %) PIK3CA (41.92 %) SMAD4 (29.45 %) RB1 (20.65 %) CTNNB1 (18.81 %) CREBBP (14.31 %) PIK3R1 (10.22 %) EP300 ( 9.20 %) RUNX1 ( 8.18 %) MTOR ( 7.98 %) SOX9 ( 7.98 %) STK11 ( 7.16 %) BRCA1 ( 6.34 %) CTNNA2 ( 5.93 %) ROCK1 ( 5.52 %) AR ( 5.32 %) ZEB2 ( 5.32 %) SPTBN1 ( 5.11 %) AXIN2 ( 4.91 %) CTNNA1 ( 4.91 %) CHUK ( 4.70 %) RBL2 ( 4.70 %) SMAD2 ( 4.70 %) TGFBR2 ( 4.50 %) ZEB1 ( 4.50 %) ESR…	0.297709	0.705024	0.998128	0.274779	0.999835	0.57998	0.624652	0.669917	0.664572	0.760617	0.999975	0.77188	0.953496	0.823583	0.935876	0.975145	0.964036	1	0.880021	0.675177	1	0.967341	0.842346	0.869987	0.999994	0.77188	0.829161	0.880021	0.887488	0.829161	1	0.944508	1	1	0.902633	0.792841	1	0.976315	0.914375
Wnt Signaling Pathway	302	250	1698044	402.382	459	0.057174	2.16788e-15	1.9268e-12	10.6754	SMAD4 (29.45 %) CTNNB1 (18.81 %) CDH1 (17.59 %) ARID1A (16.56 %) CREBBP (14.31 %) FAT3 (11.45 %) FAT2 (11.25 %) TCF7L2 (10.63 %) EP400 ( 9.41 %) SRCAP ( 9.41 %) EP300 ( 9.20 %) PCDH15 ( 9.00 %) PCDH9 ( 9.00 %) CDH10 ( 8.59 %) ITPR1 ( 8.18 %) PCDH10 ( 7.77 %) CDH8 ( 7.57 %) CDH18 ( 7.36 %) FAT1 ( 7.36 %) DCHS1 ( 7.16 %) ITPR3 ( 6.95 %) SMARCA4 ( 6.95 %) BCL9 ( 6.54 %) CDH11 ( 6.54 %) CDH9 ( 6.54 %…	0.32315	0.740326	0.999029	0.298702	0.999933	0.616349	0.661154	0.705989	0.700727	0.793811	0.999992	0.804498	0.966243	0.852812	0.951865	0.9831	0.974585	1	0.903849	0.711159	1	0.977151	0.870001	0.89493	0.999998	0.804498	0.857943	0.903849	0.910435	0.857943	1	0.958968	1	1	0.923653	0.824239	1	0.983976	0.933755
Constitutive Signaling By Aberrant PI3K In Cancer	19	61	347099	208.997	347	0.22019	2.18097e-15	1.9268e-12	31.7003	PIK3CA (41.92 %) KIT (22.90 %) EGFR (16.56 %) ERBB4 (11.45 %) FGFR2 (10.84 %) PDGFRA (10.43 %) PIK3R1 (10.22 %) PTPN11 ( 8.18 %) ERBB2 ( 7.36 %) NRG1 ( 6.13 %) ERBB3 ( 5.93 %) FGFR3 ( 4.70 %) IRS1 ( 4.50 %) VAV1 ( 4.29 %) PDGFRB ( 4.09 %) FGFR1 ( 3.89 %) FYN ( 3.48 %) GAB1 ( 3.27 %) NRG3 ( 3.27 %) KL ( 2.66 %) FGFR4 ( 2.25 %) GRB2 ( 2.25 %) PIK3CD ( 2.25 %) CD19 ( 1.84 %) LCK ( 1.84 %) KLB ( 1.64…	0.0767922	0.241203	0.7583	0.0700619	0.860329	0.178087	0.198719	0.221665	0.218833	0.276197	0.908681	0.28404	0.500269	0.324459	0.462619	0.566268	0.528481	0.98035	0.380849	0.224487	0.997661	0.538645	0.341417	0.369503	0.933663	0.28404	0.329348	0.380849	0.389778	0.329348	0.968263	0.4799	0.969172	0.995922	0.409402	0.299473	0.997164	0.570968	0.426315
G1 To S Cell Cycle Control	59	6	37551	44.6995	367	0.914363	2.39442e-15	1.9268e-12	71.1172	TP53 (61.8 %) ATM (32.5 %) CDC25A ( 2.2 %) MYC ( 1.0 %) PCNA ( 1.0 %)	0.00821073	0.0280797	0.1363	0.00746709	0.183818	0.0200334	0.0226008	0.0255267	0.0251614	0.0328032	0.218831	0.0338899	0.0690766	0.0396655	0.0620731	0.0825836	0.0746418	0.333347	0.0482641	0.0258918	0.464788	0.0767202	0.0421814	0.0464791	0.244173	0.0338899	0.040385	0.0482641	0.0496897	0.040385	0.29954	0.0652312	0.301637	0.433203	0.0528896	0.0360598	0.454051	0.0836144	0.0557248
Neurotrophic Factor Mediated Trk Receptor Signaling	256	63	455108	240.044	390	0.210773	2.44866e-15	1.9268e-12	31.2821	KRAS (44.38 %) PIK3CA (41.92 %) PIK3R1 (10.22 %) NRAS ( 8.18 %) PTPN11 ( 8.18 %) TIAM1 ( 6.95 %) ABL1 ( 6.34 %) NTRK3 ( 6.34 %) DOCK1 ( 5.52 %) ARHGAP32 ( 5.32 %) ELMO1 ( 5.11 %) NTRK2 ( 4.70 %) PRKCI ( 4.50 %) RASGRF1 ( 4.50 %) KIDINS220 ( 4.29 %) PLCG1 ( 3.89 %) RAPGEF1 ( 3.89 %) RASA1 ( 3.89 %) GAB1 ( 3.27 %) DNM1 ( 3.07 %) SOS1 ( 3.07 %) NTRK1 ( 2.86 %) NEDD4L ( 2.66 %) FRS3 ( 2.45 %) MAGED1 …	0.0991214	0.302744	0.843579	0.0905318	0.923592	0.226026	0.25131	0.279197	0.275768	0.344452	0.956142	0.353717	0.595963	0.400965	0.555744	0.664219	0.625501	0.994106	0.465439	0.282608	0.999635	0.636012	0.420534	0.452605	0.971112	0.353717	0.406622	0.465439	0.475488	0.406622	0.988974	0.574316	0.989385	0.999245	0.497415	0.371857	0.99953	0.668965	0.516135
ErbB Signaling Pathway	33	9	63995	71.2806	329	0.664225	2.45334e-15	1.9268e-12	84.8024	TP53 (61.76 %) MTOR ( 7.98 %) MAP2K7 ( 2.25 %) RPS6KB1 ( 1.64 %) CDKN1B ( 1.43 %) PDK1 ( 1.43 %) PAK4 ( 1.23 %) MYC ( 1.02 %) BCL2L11 ( 0.82 %)	0.0147599	0.0500718	0.232241	0.0134272	0.306734	0.0358409	0.0403918	0.0455667	0.0449214	0.058382	0.359446	0.0602894	0.121112	0.0703971	0.109151	0.143977	0.130566	0.518732	0.0853553	0.0462116	0.676129	0.134084	0.074785	0.082259	0.396435	0.0602894	0.0716529	0.0853553	0.0878248	0.0716529	0.473819	0.114553	0.476657	0.640844	0.0933568	0.0640926	0.664317	0.145711	0.098246
Oncogene Induced Senescence	211	30	213326	154.032	348	0.353968	2.5245e-15	1.9268e-12	71.5517	TP53 (61.76 %) TNRC6C ( 4.09 %) AGO1 ( 3.48 %) TNRC6A ( 3.48 %) TNRC6B ( 3.48 %) MOV10 ( 3.07 %) AGO3 ( 2.45 %) AGO4 ( 2.04 %) ETS1 ( 2.04 %) TFDP1 ( 2.04 %) MDM2 ( 1.84 %) SP1 ( 1.43 %) UBC ( 1.43 %) E2F2 ( 1.23 %) E2F3 ( 1.23 %) CDKN2A ( 1.02 %) ERF ( 1.02 %) ETS2 ( 1.02 %) CDK4 ( 0.82 %) CDK6 ( 0.61 %) CDKN2C ( 0.61 %) MAPK1 ( 0.61 %) MAPK3 ( 0.61 %) UBA52 ( 0.61 %) ID1 ( 0.41 %)	0.0455222	0.148666	0.563098	0.0414709	0.682675	0.108063	0.121188	0.135951	0.134119	0.171784	0.752318	0.177029	0.332685	0.204448	0.303814	0.385586	0.354918	0.898878	0.243873	0.137779	0.970766	0.363063	0.216154	0.235823	0.794431	0.177029	0.20781	0.243873	0.250251	0.20781	0.866263	0.316957	0.86851	0.959579	0.264406	0.18742	0.967294	0.389477	0.276763
Integrated Cancer Pathway	319	36	278494	180.837	425	0.371101	2.55345e-15	1.9268e-12	37.1765	TP53 (61.76 %) PTEN (38.24 %) ATM (32.52 %) RB1 (20.65 %) MSH6 (10.84 %) ATR ( 9.41 %) MSH2 ( 7.36 %) BRCA1 ( 6.34 %) CHEK2 ( 5.73 %) BLM ( 4.91 %) RAD50 ( 4.70 %) SMAD2 ( 4.70 %) JAK1 ( 4.09 %) SMAD3 ( 3.89 %) CASP8 ( 3.68 %) BAX ( 3.27 %) STAT1 ( 3.27 %) MAP3K5 ( 2.86 %) CHEK1 ( 2.45 %) AKT1 ( 2.25 %) MDM2 ( 1.84 %) CASP9 ( 1.43 %) CDK1 ( 1.43 %) CDKN1B ( 1.43 %) CDK2 ( 1.02 %) POU2F1 ( 1.02 %)…	0.0595529	0.191123	0.664202	0.0542889	0.779679	0.139902	0.156542	0.175165	0.17286	0.219945	0.841057	0.226449	0.413195	0.260231	0.379509	0.473713	0.438822	0.951187	0.308159	0.177464	0.990488	0.448141	0.274544	0.298437	0.875669	0.226449	0.264349	0.308159	0.31584	0.264349	0.929445	0.394901	0.931003	0.985422	0.332811	0.239294	0.988972	0.478101	0.347542
MiRNAs Involved In DNA Damage Response	322	8	60271	68.1169	367	0.731411	2.64898e-15	1.9268e-12	69.4823	TP53 (61.76 %) ATM (32.52 %) CDC25A ( 2.25 %) CDKN1B ( 1.43 %) MYC ( 1.02 %) CDK6 ( 0.61 %) CREB1 ( 0.61 %) H2AFX ( 0.20 %)	0.013907	0.0472279	0.220342	0.0126508	0.291796	0.0337909	0.0380867	0.0429729	0.0423635	0.05508	0.342626	0.0568828	0.114485	0.0664399	0.103139	0.136198	0.123458	0.497808	0.0805942	0.0435819	0.654169	0.1268	0.0705906	0.0776632	0.378438	0.0568828	0.0676277	0.0805942	0.0829323	0.0676277	0.453786	0.108262	0.456561	0.618791	0.0881713	0.0604781	0.642302	0.137846	0.0928031
Validated Targets Of C MYC Transcriptional Activation	138	80	453731	229.213	411	0.253602	2.70413e-15	1.9268e-12	37.4696	TP53 (61.76 %) SMAD4 (29.45 %) CREBBP (14.31 %) TRRAP (10.84 %) HUWE1 ( 9.41 %) EP300 ( 9.20 %) CAD ( 4.29 %) SMAD3 ( 3.89 %) MMP9 ( 3.48 %) BAX ( 3.27 %) EIF4G1 ( 3.27 %) DDX18 ( 3.07 %) LDHA ( 2.86 %) MTDH ( 2.66 %) NCL ( 2.45 %) CDC25A ( 2.25 %) NBN ( 2.25 %) SUPT3H ( 2.25 %) TAF4B ( 2.25 %) MYCT1 ( 2.04 %) HSP90AA1 ( 1.84 %) IREB2 ( 1.84 %) MTA1 ( 1.84 %) RUVBL1 ( 1.84 %) CCNB1 ( 1.64 %) KIR3…	0.0909051	0.280528	0.816188	0.0829943	0.904439	0.208585	0.232224	0.258377	0.255157	0.319927	0.942435	0.328708	0.562828	0.373662	0.523261	0.630786	0.592103	0.990789	0.435511	0.261582	0.999273	0.602569	0.39237	0.423151	0.960682	0.328708	0.379065	0.435511	0.445209	0.379065	0.983682	0.541491	0.984238	0.998589	0.466423	0.345932	0.999085	0.635553	0.484598
Regulation Of TP53 Activity Through Acetylation	167	23	203598	155.444	366	0.371908	2.75145e-15	1.9268e-12	69.1257	TP53 (61.76 %) EP300 ( 9.20 %) CHD4 ( 6.54 %) KAT6A ( 5.52 %) CHD3 ( 4.91 %) RBBP7 ( 3.27 %) BRD1 ( 2.86 %) BRPF1 ( 2.86 %) BRPF3 ( 2.66 %) AKT1 ( 2.25 %) MTA2 ( 2.25 %) PML ( 2.25 %) BRD7 ( 2.04 %) GATAD2A ( 2.04 %) AKT3 ( 1.84 %) AKT2 ( 1.64 %) HDAC2 ( 1.23 %) MEAF6 ( 1.23 %) GATAD2B ( 1.02 %) HDAC1 ( 1.02 %) ING5 ( 0.82 %) RBBP4 ( 0.82 %) MBD3 ( 0.41 %)	0.0462066	0.150773	0.568633	0.0420957	0.688234	0.109632	0.122934	0.137893	0.136037	0.174184	0.757583	0.179494	0.336828	0.207244	0.307685	0.390176	0.359257	0.902383	0.24712	0.139745	0.972314	0.367471	0.219088	0.238981	0.799377	0.179494	0.210646	0.24712	0.253568	0.210646	0.870342	0.320954	0.872553	0.961528	0.267875	0.190012	0.968972	0.394098	0.280362
Regulation Of TP53 Degradation	171	35	270053	181.246	390	0.332797	2.75197e-15	1.9268e-12	53.5897	TP53 (61.76 %) ATM (32.52 %) MTOR ( 7.98 %) CHEK2 ( 5.73 %) RICTOR ( 4.50 %) USP7 ( 4.29 %) DAXX ( 3.48 %) CCNA1 ( 3.27 %) PPP2R1A ( 2.86 %) AKT1 ( 2.25 %) AKT3 ( 1.84 %) MDM2 ( 1.84 %) SGK1 ( 1.84 %) USP2 ( 1.84 %) AKT2 ( 1.64 %) CDK1 ( 1.43 %) UBC ( 1.43 %) MAPKAP1 ( 1.23 %) MDM4 ( 1.23 %) CCNG1 ( 1.02 %) CDK2 ( 1.02 %) CDKN2A ( 1.02 %) CCNA2 ( 0.82 %) PDPK1 ( 0.82 %) PPP2R1B ( 0.82 %) PPP2R5C …	0.0597841	0.19181	0.665666	0.0545002	0.78101	0.140421	0.157117	0.175801	0.173489	0.22072	0.842223	0.227244	0.414446	0.261124	0.380694	0.475064	0.440119	0.951774	0.309179	0.178107	0.990664	0.449453	0.275475	0.299432	0.876702	0.227244	0.265253	0.309179	0.316879	0.265253	0.93019	0.396117	0.931737	0.985666	0.333891	0.240127	0.989169	0.479458	0.348657
TP53 Regulates Transcription Of DNA Repair Genes	186	61	429440	221.151	403	0.260616	2.77488e-15	1.9268e-12	43.9206	TP53 (61.76 %) ATM (32.52 %) MLH1 (11.25 %) ATR ( 9.41 %) FANCD2 ( 7.77 %) MSH2 ( 7.36 %) CDK12 ( 7.16 %) BRCA1 ( 6.34 %) CDK13 ( 3.89 %) ERCC3 ( 3.89 %) SUPT5H ( 3.68 %) MDC1 ( 3.48 %) POLR2A ( 3.07 %) SSRP1 ( 3.07 %) SUPT16H ( 2.86 %) CHEK1 ( 2.45 %) POLR2B ( 2.25 %) CCNT1 ( 2.04 %) CCNT2 ( 1.84 %) ERCC2 ( 1.84 %) FANCI ( 1.84 %) PMS2 ( 1.84 %) FANCC ( 1.64 %) ATF2 ( 1.43 %) CCNH ( 1.43 %) ELL …	0.0850923	0.264511	0.794142	0.0776656	0.888191	0.196106	0.218535	0.243402	0.240338	0.302164	0.930326	0.310575	0.537955	0.353755	0.499048	0.605346	0.566893	0.987397	0.413506	0.246454	0.998821	0.577271	0.371785	0.401531	0.951182	0.310575	0.358958	0.413506	0.422913	0.358958	0.978512	0.516946	0.979196	0.997811	0.443531	0.327096	0.998539	0.610103	0.461239
TP53 Regulates Transcription Of Additional Cell Cycle Genes Whose Exact Role In The P53 Pathway Remain Uncertain	132	21	130395	114.5	346	0.480269	2.80376e-15	1.9268e-12	77.4566	TP53 (61.76 %) CNOT1 ( 7.16 %) CENPJ ( 4.50 %) CNOT11 ( 3.68 %) TNKS1BP1 ( 3.27 %) CNOT10 ( 2.04 %) CNOT7 ( 1.84 %) CNOT3 ( 1.64 %) PLK2 ( 1.64 %) CDC25C ( 1.23 %) CNOT2 ( 1.02 %) CNOT4 ( 1.02 %) CNOT6 ( 1.02 %) CNOT6L ( 1.02 %) PLAGL1 ( 0.82 %) CNOT8 ( 0.61 %) NPM1 ( 0.61 %) PLK3 ( 0.61 %) BTG2 ( 0.20 %) RGCC ( 0.20 %)	0.0286513	0.095545	0.403483	0.0260809	0.511381	0.0688668	0.0774396	0.0871404	0.0859334	0.110949	0.581371	0.114466	0.223049	0.132991	0.202243	0.262073	0.239303	0.76062	0.160055	0.0883458	0.889641	0.24531	0.140973	0.154487	0.627325	0.114466	0.135279	0.160055	0.164482	0.135279	0.715005	0.211674	0.718002	0.864914	0.17436	0.121459	0.881635	0.264993	0.183041
Regulation Of TP53 Activity Through Methylation	169	19	177982	140.941	378	0.428455	2.8073e-15	1.9268e-12	58.2011	TP53 (61.76 %) ATM (32.52 %) EP300 ( 9.20 %) CHEK2 ( 5.73 %) EHMT1 ( 2.25 %) EHMT2 ( 2.04 %) L3MBTL1 ( 1.84 %) MDM2 ( 1.84 %) PRMT5 ( 1.43 %) UBC ( 1.43 %) MDM4 ( 1.23 %) TTC5 ( 1.23 %) KMT5A ( 1.02 %) SETD9 ( 0.82 %) JMY ( 0.61 %) SMYD2 ( 0.61 %) UBA52 ( 0.61 %)	0.0394527	0.129818	0.510998	0.0359314	0.629041	0.0940766	0.105605	0.118601	0.116987	0.150271	0.700528	0.154922	0.294932	0.179303	0.268654	0.34349	0.315273	0.861885	0.214561	0.120212	0.952728	0.322749	0.189747	0.207343	0.745064	0.154922	0.182301	0.214561	0.220288	0.182301	0.824156	0.280598	0.826711	0.937457	0.233023	0.164149	0.947915	0.347084	0.244167
FGF Signaling Pathway ( FGF Signaling Pathway )	46	44	264279	179.596	386	0.33229	2.80826e-15	1.9268e-12	36.5285	KRAS (44.38 %) PIK3CA (41.92 %) BRAF (21.06 %) FGFR2 (10.84 %) PIK3R1 (10.22 %) NRAS ( 8.18 %) FGFR3 ( 4.70 %) PLCG2 ( 4.50 %) FGFR1 ( 3.89 %) PLCG1 ( 3.89 %) GAB1 ( 3.27 %) SOS1 ( 3.07 %) PRKCD ( 2.86 %) SOS2 ( 2.86 %) RAF1 ( 2.66 %) FGF14 ( 2.45 %) FRS3 ( 2.45 %) FGF13 ( 2.25 %) FGFR4 ( 2.25 %) GRB2 ( 2.25 %) PIK3CD ( 2.25 %) ARAF ( 2.04 %) FGF23 ( 1.43 %) FGF5 ( 1.43 %) FGF10 ( 1.02 %) FGF2 ( …	0.0588539	0.189044	0.659737	0.0536498	0.775609	0.138332	0.154802	0.173241	0.170958	0.217596	0.837479	0.224041	0.409397	0.257528	0.375915	0.469608	0.434885	0.94937	0.305068	0.175517	0.989937	0.444157	0.27172	0.295421	0.872492	0.224041	0.261611	0.305068	0.31269	0.261611	0.927144	0.391211	0.928734	0.984656	0.329535	0.236772	0.988354	0.473977	0.344162
VEGF Signaling Pathway	140	54	365703	215.937	347	0.206003	2.81051e-15	1.9268e-12	39.7695	PIK3CA (41.92 %) BRAF (21.06 %) PIK3R1 (10.22 %) NRAS ( 8.18 %) PIK3CG ( 6.95 %) KDR ( 6.54 %) PRKD1 ( 5.73 %) PIK3C3 ( 5.32 %) PRKCB ( 5.11 %) PIK3C2A ( 4.70 %) PRKCG ( 4.70 %) PIK3C2B ( 4.50 %) PLCG2 ( 4.50 %) PRKCI ( 4.50 %) NOS3 ( 4.29 %) PTK2 ( 4.09 %) PLCG1 ( 3.89 %) PRKD3 ( 3.68 %) PRKCQ ( 3.27 %) PRKCD ( 2.86 %) PRKD2 ( 2.86 %) PRKCH ( 2.66 %) RAF1 ( 2.66 %) HIF1A ( 2.45 %) AKT1 ( 2.25 %)…	0.0814648	0.254388	0.779143	0.0743416	0.876742	0.18826	0.209913	0.233954	0.230989	0.290903	0.921557	0.299072	0.521805	0.341078	0.483401	0.588676	0.550463	0.98469	0.399414	0.236907	0.998408	0.560761	0.358655	0.387703	0.944161	0.299072	0.346149	0.399414	0.408622	0.346149	0.974508	0.50105	0.975283	0.997125	0.428827	0.315129	0.998046	0.593415	0.446206
Transcriptional Activation Of Cell Cycle Inhibitor P21	135	4	14543	20.5227	306	1.17349	2.82914e-15	1.9268e-12	97.7124	TP53 (61.76 %) ZNF385A ( 1.64 %) CDKN1A ( 0.41 %) PCBP4 ( 0.20 %)	0.00337352	0.0116058	0.0582901	0.00306731	0.0798805	0.00826015	0.0093259	0.0105425	0.0103905	0.0135775	0.0962686	0.0140319	0.0289116	0.0164521	0.0259238	0.0347115	0.0312953	0.15312	0.0200712	0.0106945	0.226018	0.0321876	0.017509	0.0193183	0.108402	0.0140319	0.0167542	0.0200712	0.0206731	0.0167542	0.135774	0.0272695	0.136835	0.207613	0.022026	0.0149402	0.219691	0.0351562	0.023227
FCERI Mediated MAPK Activation	44	40	193941	143.429	324	0.353908	2.88937e-15	1.9268e-12	62.037	KRAS (44.38 %) NRAS ( 8.18 %) MAP2K4 ( 6.95 %) VAV3 ( 5.52 %) PLCG2 ( 4.50 %) VAV1 ( 4.29 %) PLCG1 ( 3.89 %) VAV2 ( 3.89 %) MAPK10 ( 3.48 %) SOS1 ( 3.07 %) MAPK8 ( 2.86 %) MAPK9 ( 2.66 %) PAK1 ( 2.66 %) SHC1 ( 2.45 %) GRB2 ( 2.25 %) LCP2 ( 2.25 %) MAP2K7 ( 2.25 %) PAK2 ( 2.25 %) LYN ( 2.04 %) SYK ( 1.64 %) FOS ( 1.02 %) GRAP2 ( 1.02 %) HRAS ( 0.82 %) LAT ( 0.61 %) MAPK1 ( 0.61 %) MAPK3 ( 0.61 %) …	0.0405683	0.133304	0.520994	0.0369493	0.639511	0.0966569	0.108482	0.121808	0.120153	0.154256	0.710772	0.159019	0.30201	0.183971	0.27523	0.351417	0.322719	0.869557	0.220018	0.123459	0.956715	0.330326	0.194654	0.212642	0.754927	0.159019	0.187038	0.220018	0.225869	0.187038	0.832762	0.287406	0.835262	0.942267	0.238874	0.168464	0.952173	0.35507	0.250251
P53 Pathway By Glucose Deprivation	162	21	146524	126.284	349	0.441476	2.95777e-15	1.9268e-12	73.3524	TP53 (61.76 %) STK11 ( 7.16 %) TP63 ( 4.29 %) TSC2 ( 3.48 %) PRKAA2 ( 3.27 %) TSC1 ( 2.66 %) AKT1 ( 2.25 %) PRKAA1 ( 2.04 %) AKT3 ( 1.84 %) AKT2 ( 1.64 %) RPS6KB1 ( 1.64 %) RHEB ( 1.23 %) TP73 ( 1.23 %) PRKAB1 ( 1.02 %) PRKAB2 ( 1.02 %) PRKAG1 ( 1.02 %) RPS6KB2 ( 1.02 %) IGBP1 ( 0.82 %) PPP2CA ( 0.61 %) PPP2CB ( 0.61 %)	0.0332324	0.110196	0.451554	0.0302574	0.565099	0.0796088	0.0894534	0.100575	0.0991926	0.12779	0.636646	0.1318	0.254291	0.15288	0.231024	0.297657	0.272397	0.810279	0.183544	0.101956	0.922883	0.279073	0.161941	0.177249	0.682591	0.1318	0.155479	0.183544	0.188546	0.155479	0.767629	0.241583	0.770467	0.90245	0.199688	0.139766	0.916342	0.300886	0.209464
Ras Pathway	115	69	457806	238.913	404	0.228142	2.96886e-15	1.9268e-12	30.9406	KRAS (44.38 %) PIK3CA (41.92 %) BRAF (21.06 %) MAP3K4 ( 8.18 %) NRAS ( 8.18 %) MAP2K4 ( 6.95 %) PIK3CG ( 6.95 %) TIAM1 ( 6.95 %) PIK3C3 ( 5.32 %) RPS6KA2 ( 4.91 %) PAK3 ( 3.68 %) RPS6KA6 ( 3.68 %) MAPK10 ( 3.48 %) PLD1 ( 3.48 %) GSK3B ( 3.27 %) RPS6KA3 ( 3.27 %) STAT1 ( 3.27 %) SOS1 ( 3.07 %) MAPK8 ( 2.86 %) SOS2 ( 2.86 %) MAPK9 ( 2.66 %) PAK1 ( 2.66 %) RAF1 ( 2.66 %) RGL2 ( 2.45 %) RHOA ( 2.45 %…	0.0982406	0.300386	0.840838	0.0897234	0.92173	0.224167	0.249279	0.276984	0.273577	0.341855	0.954839	0.351071	0.592521	0.398084	0.552357	0.660771	0.622041	0.993816	0.462295	0.280374	0.999606	0.632552	0.417566	0.449508	0.970138	0.351071	0.403716	0.462295	0.47231	0.403716	0.988499	0.570898	0.988923	0.999192	0.494167	0.369116	0.999495	0.66552	0.512835
G2/M DNA Damage Checkpoint// Processing Of DNA Double Strand Break Ends	154	100	464250	229.198	408	0.250449	3.01839e-15	1.9268e-12	39.951	TP53 (61.76 %) ATM (32.52 %) ATR ( 9.41 %) HERC2 ( 9.00 %) CLSPN ( 6.95 %) BRCA1 ( 6.34 %) CHEK2 ( 5.73 %) BLM ( 4.91 %) RAD50 ( 4.70 %) TOPBP1 ( 4.29 %) TP53BP1 ( 4.09 %) TOP3A ( 3.68 %) MDC1 ( 3.48 %) WRN ( 3.48 %) BRIP1 ( 3.27 %) CCNA1 ( 3.27 %) BRE ( 2.86 %) RBBP8 ( 2.86 %) TIMELESS ( 2.66 %) CHEK1 ( 2.45 %) BARD1 ( 2.25 %) DNA2 ( 2.25 %) EXO1 ( 2.25 %) NBN ( 2.25 %) RNF168 ( 2.04 %) RPA1 ( 2…	0.0908941	0.280498	0.816149	0.0829843	0.90441	0.208561	0.232198	0.258348	0.255129	0.319894	0.942414	0.328674	0.562782	0.373625	0.523216	0.630739	0.592057	0.990783	0.43547	0.261554	0.999272	0.602522	0.392332	0.42311	0.960666	0.328674	0.379027	0.43547	0.445167	0.379027	0.983673	0.541445	0.984229	0.998587	0.46638	0.345897	0.999084	0.635507	0.484555
TP53 Regulates Transcription Of Death Receptors And Ligands	185	12	58774	66.8224	338	0.703995	3.02849e-15	1.9268e-12	86.9822	TP53 (61.76 %) TP63 ( 4.29 %) TP53BP2 ( 2.86 %) PPP1R13B ( 2.04 %) FAS ( 1.84 %) TNFRSF10C ( 1.84 %) IGFBP3 ( 1.64 %) TNFRSF10A ( 1.43 %) TNFRSF10B ( 1.23 %) TP73 ( 1.23 %) TNFRSF10D ( 0.61 %) TMEM219 ( 0.41 %)	0.0135639	0.0460824	0.215507	0.0123385	0.285701	0.0329656	0.0371585	0.0419282	0.0413333	0.0537494	0.33574	0.05551	0.111806	0.0648444	0.100711	0.133051	0.120584	0.489143	0.0786733	0.0425228	0.644927	0.123854	0.0688991	0.0758093	0.371054	0.05551	0.0660047	0.0786733	0.0809582	0.0660047	0.44552	0.105721	0.448267	0.60955	0.0860784	0.0590212	0.633051	0.134664	0.0906058
Stabilization Of P53	174	9	68271	70.8814	366	0.712949	3.06726e-15	1.9268e-12	65.5738	TP53 (61.76 %) ATM (32.52 %) CHEK2 ( 5.73 %) MDM2 ( 1.84 %) UBC ( 1.43 %) MDM4 ( 1.23 %) UBA52 ( 0.61 %)	0.0146512	0.0497095	0.230733	0.0133282	0.304846	0.0355796	0.0400981	0.0452362	0.0445955	0.0579615	0.357325	0.0598556	0.12027	0.0698933	0.108386	0.142989	0.129662	0.516112	0.0847494	0.0458766	0.673408	0.133159	0.0742511	0.081674	0.394169	0.0598556	0.0711405	0.0847494	0.0872022	0.0711405	0.471305	0.113753	0.474135	0.638103	0.0926971	0.0636324	0.661586	0.144712	0.0975536
Insulin/IGF Pathway Protein Kinase B Signaling Cascade	365	22	190830	149.149	310	0.317741	3.07681e-15	1.9268e-12	37.7419	PIK3CA (41.92 %) PTEN (38.24 %) IGF2R ( 9.20 %) IRS4 ( 6.13 %) INSRR ( 5.93 %) IRS1 ( 4.50 %) IGF1R ( 4.29 %) INSR ( 4.29 %) TSC2 ( 3.48 %) GSK3B ( 3.27 %) INPPL1 ( 3.07 %) TSC1 ( 2.66 %) MDM2 ( 1.84 %) FOXO1 ( 1.64 %) IGF2 ( 1.43 %) GSK3A ( 1.23 %) IGF1 ( 1.23 %) IRS2 ( 1.23 %) MDM4 ( 1.23 %) FOXO3 ( 0.82 %) PDPK1 ( 0.82 %)	0.0432002	0.14149	0.543818	0.0393513	0.6631	0.102727	0.115247	0.129341	0.127592	0.163603	0.733618	0.168624	0.318459	0.194902	0.290541	0.369779	0.34	0.886042	0.232768	0.131087	0.964853	0.347901	0.206135	0.225029	0.776751	0.168624	0.198127	0.232768	0.238904	0.198127	0.851468	0.303243	0.853834	0.952217	0.25253	0.178577	0.960908	0.373562	0.264438
GRB2 Events In EGFR Signaling// SHC1 Events In EGFR Signaling	61	8	51014	59.8871	312	0.716821	3.12688e-15	1.9268e-12	79.4872	KRAS (44.38 %) EGFR (16.56 %) NRAS ( 8.18 %) SOS1 ( 3.07 %) SHC1 ( 2.45 %) GRB2 ( 2.25 %) EGF ( 1.23 %) HRAS ( 0.82 %)	0.0117837	0.0401219	0.18996	0.0107182	0.253255	0.0286761	0.0323327	0.0364948	0.0359755	0.0468218	0.298876	0.0483613	0.097793	0.0565299	0.0880182	0.116553	0.105537	0.44177	0.0686517	0.0370138	0.592911	0.108424	0.0600816	0.0661392	0.331344	0.0483613	0.0575461	0.0686517	0.0706567	0.0575461	0.400622	0.0924299	0.4032	0.557929	0.0751524	0.0514328	0.581118	0.11798	0.0791303
P53 Pathway	161	11	117607	109.891	386	0.545624	3.1518e-15	1.9268e-12	54.4041	TP53 (61.76 %) ATM (32.52 %) CREBBP (14.31 %) ATR ( 9.41 %) EP300 ( 9.20 %) KAT2B ( 2.45 %) AKT1 ( 2.25 %) MDM2 ( 1.84 %) MDM4 ( 1.23 %) CDK2 ( 1.02 %) PPP2CA ( 0.61 %)	0.0269572	0.0900842	0.384721	0.0245369	0.489949	0.0648758	0.0729715	0.082138	0.0809971	0.104659	0.55894	0.10799	0.211206	0.125543	0.191365	0.248507	0.226728	0.739201	0.151227	0.0832774	0.874054	0.23247	0.133113	0.145939	0.604611	0.10799	0.127713	0.151227	0.155434	0.127713	0.692734	0.200354	0.695772	0.847693	0.164823	0.114613	0.865484	0.251303	0.173081
BARD1 Signaling Events	308	29	200354	148.942	396	0.424677	3.252e-15	1.9268e-12	50.5051	TP53 (61.76 %) ATM (32.52 %) PRKDC (14.11 %) ATR ( 9.41 %) FANCD2 ( 7.77 %) BRCA1 ( 6.34 %) RAD50 ( 4.70 %) TOPBP1 ( 4.29 %) RBBP8 ( 2.86 %) FANCA ( 2.66 %) XRCC5 ( 2.66 %) BACH1 ( 2.25 %) BARD1 ( 2.25 %) NBN ( 2.25 %) FANCC ( 1.64 %) XRCC6 ( 1.43 %) CCNE1 ( 1.23 %) FANCL ( 1.23 %) CDK2 ( 1.02 %) CSTF1 ( 1.02 %) EWSR1 ( 1.02 %) FANCG ( 1.02 %) PCNA ( 1.02 %) UBE2L3 ( 1.02 %) FANCE ( 0.82 %) FANCF…	0.0431035	0.14119	0.542998	0.039263	0.66226	0.102505	0.114999	0.129065	0.127319	0.163261	0.732811	0.168273	0.31786	0.194502	0.289983	0.369112	0.339372	0.885474	0.232303	0.130808	0.964583	0.347263	0.205716	0.224577	0.775984	0.168273	0.197722	0.232303	0.238428	0.197722	0.850818	0.302666	0.85319	0.951884	0.252032	0.178207	0.960616	0.372891	0.263921
Raf Activation Signaling (through RasGRP) ( CD4 T Cell Receptor Signaling (ERK Cascade) )// Raf Activation Signaling (through RasGRP) ( CD4 T Cell Receptor Signaling )	112	8	44759	53.998	319	0.771413	3.27491e-15	1.9268e-12	76.489	KRAS (44.38 %) BRAF (21.06 %) NRAS ( 8.18 %) PRKCQ ( 3.27 %) RAF1 ( 2.66 %) ARAF ( 2.04 %) RASGRP1 ( 2.04 %) HRAS ( 0.82 %)	0.0103463	0.0352903	0.168763	0.0094102	0.226031	0.0252048	0.0284252	0.0320927	0.031635	0.0412009	0.267678	0.0425597	0.0863365	0.0497743	0.0776571	0.103027	0.0932212	0.400406	0.0604943	0.0325501	0.545486	0.0957896	0.0529135	0.058271	0.297518	0.0425597	0.0506722	0.0604943	0.0622692	0.0506722	0.361798	0.081573	0.364207	0.511394	0.0662504	0.0452715	0.533954	0.104298	0.0697751
Signaling By FGFR1 In Disease	119	33	251575	174.568	370	0.326237	3.27843e-15	1.9268e-12	41.8919	KRAS (44.38 %) PIK3CA (41.92 %) PIK3R1 (10.22 %) NRAS ( 8.18 %) CNTRL ( 4.09 %) FGFR1 ( 3.89 %) PLCG1 ( 3.89 %) TRIM24 ( 3.89 %) MYO18A ( 3.68 %) CUX1 ( 3.27 %) GAB1 ( 3.27 %) SOS1 ( 3.07 %) ZMYM2 ( 3.07 %) LRRFIP1 ( 2.86 %) BCR ( 2.25 %) GRB2 ( 2.25 %) BAG4 ( 2.04 %) CPSF6 ( 2.04 %) FGF23 ( 1.43 %) FGF5 ( 1.43 %) FGF2 ( 1.02 %) FGF20 ( 1.02 %) FGF6 ( 1.02 %) FRS2 ( 1.02 %) FGF8 ( 0.82 %) HRAS ( …	0.0560716	0.180732	0.641409	0.0511068	0.758682	0.132066	0.147856	0.165551	0.163359	0.208197	0.822454	0.214403	0.394066	0.24669	0.36143	0.452985	0.418969	0.941459	0.29265	0.167737	0.987413	0.428041	0.260395	0.283312	0.859049	0.214403	0.250632	0.29265	0.300033	0.250632	0.917239	0.376328	0.918958	0.981198	0.316363	0.22667	0.985536	0.457272	0.330559
Ephrin B Reverse Signaling	250	26	173242	140.946	290	0.313344	3.28431e-15	1.9268e-12	55.1724	PIK3CA (41.92 %) PIK3R1 (10.22 %) EPHB1 ( 8.59 %) MAP2K4 ( 6.95 %) TIAM1 ( 6.95 %) PTPN13 ( 5.32 %) RGS3 ( 4.29 %) FYN ( 3.48 %) HCK ( 3.27 %) DNM1 ( 3.07 %) EPHB2 ( 3.07 %) MAPK8 ( 2.86 %) EPHB4 ( 2.66 %) ITGB3 ( 2.66 %) ITGA2B ( 2.04 %) LYN ( 2.04 %) LCK ( 1.84 %) YES1 ( 1.84 %) BLK ( 1.64 %) MAP3K7 ( 1.64 %) EFNB1 ( 1.23 %) NCK2 ( 1.02 %) FGR ( 0.82 %) SRC ( 0.82 %) RAC1 ( 0.41 %) EFNB2 ( 0.20…	0.0394552	0.129825	0.511021	0.0359336	0.629065	0.0940823	0.105612	0.118608	0.116994	0.15028	0.70055	0.154931	0.294948	0.179313	0.268668	0.343507	0.31529	0.861903	0.214573	0.12022	0.952737	0.322766	0.189758	0.207354	0.745086	0.154931	0.182311	0.214573	0.220301	0.182311	0.824175	0.280613	0.82673	0.937468	0.233035	0.164158	0.947924	0.347101	0.244181
PDGF Signaling Pathway (Mammal) ( PDGF Signaling Pathway )	285	29	178886	138.774	374	0.430564	3.28745e-15	1.9268e-12	40.3743	KRAS (44.38 %) PIK3CA (41.92 %) PDGFRA (10.43 %) PIK3R1 (10.22 %) NRAS ( 8.18 %) PTPN11 ( 8.18 %) PDGFRB ( 4.09 %) RASA1 ( 3.89 %) STAT5B ( 3.89 %) SOS1 ( 3.07 %) ARHGEF6 ( 2.86 %) SOS2 ( 2.86 %) PAK1 ( 2.66 %) RAF1 ( 2.66 %) SHC1 ( 2.45 %) GRB2 ( 2.25 %) PIK3CD ( 2.25 %) STAT5A ( 1.84 %) PIK3CB ( 1.02 %) HRAS ( 0.82 %) SHC3 ( 0.82 %) CDC42 ( 0.61 %) PDGFA ( 0.61 %) PIK3R2 ( 0.61 %) SHC2 ( 0.61 %…	0.0384954	0.126818	0.502264	0.0350579	0.619825	0.0918589	0.103132	0.115843	0.114264	0.14684	0.691457	0.151395	0.288808	0.17528	0.262969	0.336617	0.308825	0.85495	0.209853	0.11742	0.94902	0.316186	0.185517	0.202771	0.736293	0.151395	0.178218	0.209853	0.215472	0.178218	0.816427	0.274711	0.819029	0.933016	0.22797	0.160432	0.943963	0.340159	0.238913
Senescence And Autophagy In Cancer	172	7	37969	44.4898	323	0.860942	3.35971e-15	1.9268e-12	88.8545	TP53 (61.76 %) MTOR ( 7.98 %) ING1 ( 2.45 %) IRF1 ( 1.23 %) IFNB1 ( 1.02 %) JUN ( 0.41 %)	0.00816441	0.0279228	0.135582	0.00742495	0.182878	0.0199211	0.0224742	0.0253839	0.0250207	0.0326204	0.217738	0.0337012	0.0686991	0.0394453	0.0617325	0.0821355	0.0742351	0.331814	0.0479974	0.025747	0.462889	0.0763026	0.0419476	0.046222	0.242973	0.0337012	0.0401609	0.0479974	0.0494153	0.0401609	0.298126	0.0648739	0.300215	0.431378	0.052598	0.0358593	0.452176	0.083161	0.055418
DNA Damage/Telomere Stress Induced Senescence	208	64	172030	130.163	391	0.477689	3.36219e-15	1.9268e-12	54.9872	TP53 (61.76 %) ATM (32.52 %) EP400 ( 9.41 %) RAD50 ( 4.70 %) CCNA1 ( 3.27 %) NBN ( 2.25 %) CDKN1B ( 1.43 %) TERF1 ( 1.43 %) CCNE1 ( 1.23 %) HIST2H2AC ( 1.23 %) KAT5 ( 1.23 %) POT1 ( 1.23 %) CDK2 ( 1.02 %) HIST1H2BA ( 1.02 %) HIST1H4L ( 1.02 %) ACD ( 0.82 %) CCNA2 ( 0.82 %) HIST1H2BD ( 0.82 %) HIST1H2BL ( 0.82 %) HIST1H4I ( 0.82 %) TERF2IP ( 0.82 %) CCNE2 ( 0.61 %) HIST1H2AB ( 0.61 %) HIST1H2AC ( …	0.034821	0.115237	0.467353	0.0317062	0.582369	0.0833168	0.0935961	0.105203	0.10376	0.133573	0.654112	0.137751	0.264863	0.159692	0.240792	0.30963	0.28357	0.825021	0.191561	0.106643	0.931924	0.290462	0.169115	0.185023	0.699831	0.137751	0.162395	0.191561	0.196754	0.162395	0.783559	0.25172	0.786331	0.912896	0.208316	0.146045	0.925856	0.312958	0.218454
Aurora A Signaling	307	33	204072	152.363	354	0.366124	3.40558e-15	1.9268e-12	70.904	TP53 (61.76 %) BRCA1 ( 6.34 %) ARHGEF7 ( 4.50 %) RASA1 ( 3.89 %) GSK3B ( 3.27 %) TDRD7 ( 3.27 %) PAK1 ( 2.66 %) AKT1 ( 2.25 %) CKAP5 ( 2.04 %) DLGAP5 ( 2.04 %) CDC25B ( 1.84 %) MDM2 ( 1.84 %) AURKA ( 1.64 %) KPNA1 ( 1.64 %) TACC3 ( 1.64 %) TPX2 ( 1.64 %) CPEB1 ( 1.43 %) TACC1 ( 1.43 %) NDEL1 ( 1.23 %) PPP2R5D ( 1.23 %) GIT1 ( 1.02 %) RAN ( 1.02 %) CENPA ( 0.82 %) FZR1 ( 0.82 %) KPNB1 ( 0.82 %) AU…	0.0447206	0.146193	0.556531	0.0407391	0.676044	0.106223	0.11914	0.133673	0.13187	0.168966	0.74601	0.174135	0.327804	0.201162	0.299256	0.38017	0.349802	0.894615	0.240054	0.135473	0.968845	0.357865	0.212707	0.232111	0.788487	0.174135	0.204478	0.240054	0.24635	0.204478	0.861326	0.31225	0.863614	0.957174	0.260324	0.184376	0.965215	0.384025	0.272528
FGF8 Signaling Pathway(Mouse) ( FGF8 Signaling (Mouse) )// FGF8 Signaling Pathway(Xenopus) ( FGF8 Signaling (Xenopus) )	47	20	124306	114.016	338	0.471951	3.43333e-15	1.9268e-12	67.7515	KRAS (44.38 %) BRAF (21.06 %) NRAS ( 8.18 %) SOS1 ( 3.07 %) ERG ( 2.86 %) ETV5 ( 2.86 %) SOS2 ( 2.86 %) RAF1 ( 2.66 %) FRS3 ( 2.45 %) ETV6 ( 2.25 %) ARAF ( 2.04 %) ETS1 ( 2.04 %) FLI1 ( 1.84 %) ELK3 ( 1.43 %) ELK1 ( 1.02 %) ELK4 ( 1.02 %) ETS2 ( 1.02 %) FRS2 ( 1.02 %) SPI1 ( 1.02 %) HRAS ( 0.82 %)	0.0284707	0.094964	0.401509	0.0259163	0.509138	0.0684419	0.076964	0.0866081	0.0854081	0.11028	0.579034	0.113777	0.221794	0.132199	0.201089	0.260638	0.237971	0.758421	0.159117	0.0878065	0.888074	0.24395	0.140138	0.153579	0.624966	0.113777	0.134475	0.159117	0.163522	0.134475	0.712708	0.210474	0.71571	0.863174	0.173347	0.120731	0.880009	0.263544	0.181984
MAP2K And MAPK Activation	78	38	264014	180.748	360	0.299229	3.43817e-15	1.9268e-12	54.4444	KRAS (44.38 %) BRAF (21.06 %) FN1 ( 9.41 %) NRAS ( 8.18 %) VWF ( 6.54 %) IQGAP1 ( 5.52 %) FGA ( 4.50 %) KSR2 ( 4.29 %) TLN1 ( 4.29 %) APBB1IP ( 3.89 %) KSR1 ( 3.68 %) CNKSR2 ( 3.07 %) ITGB3 ( 2.66 %) RAF1 ( 2.66 %) CNKSR1 ( 2.45 %) ARAF ( 2.04 %) ITGA2B ( 2.04 %) MAP2K1 ( 1.84 %) MARK3 ( 1.84 %) IL17RD ( 1.64 %) VCL ( 1.64 %) FGG ( 1.43 %) FGB ( 1.23 %) CSK ( 1.02 %) HRAS ( 0.82 %) SRC ( 0.82 %) …	0.0595027	0.190974	0.663882	0.0542429	0.779389	0.139789	0.156417	0.175027	0.172724	0.219776	0.840802	0.226276	0.412923	0.260037	0.379252	0.473419	0.43854	0.951059	0.307937	0.177324	0.99045	0.447856	0.274341	0.298221	0.875443	0.226276	0.264153	0.307937	0.315614	0.264153	0.929282	0.394636	0.930842	0.985368	0.332576	0.239113	0.988929	0.477805	0.3473
Hypoxic And Oxygen Homeostasis Regulation Of HIF 1 Alpha	274	19	105546	98.0606	351	0.553813	3.44029e-15	1.9268e-12	74.9288	TP53 (61.76 %) VHL (15.95 %) HIF3A ( 3.27 %) CUL2 ( 3.07 %) HIF1A ( 2.45 %) HSP90AA1 ( 1.84 %) ARNT ( 1.43 %) EGLN2 ( 1.43 %) OS9 ( 1.43 %) CDKN2A ( 1.02 %) EGLN1 ( 1.02 %) HIF1AN ( 0.82 %) EGLN3 ( 0.61 %) COPS5 ( 0.41 %) RACK1 ( 0.41 %) NAA10 ( 0.20 %) RBX1 ( 0.20 %)	0.022851	0.0767506	0.336905	0.0207954	0.434191	0.05516	0.062084	0.0699349	0.0689572	0.089276	0.499644	0.0921423	0.181834	0.107277	0.164459	0.214684	0.195474	0.679187	0.129508	0.0709117	0.826682	0.20053	0.113819	0.124923	0.543834	0.0921423	0.109151	0.129508	0.133159	0.109151	0.631457	0.172323	0.634542	0.796454	0.141318	0.0978478	0.816756	0.217156	0.148506
VEGFR2 Mediated Cell Proliferation	299	21	161672	130.938	310	0.374295	3.66085e-15	1.9268e-12	65.8065	KRAS (44.38 %) ITPR1 ( 8.18 %) NRAS ( 8.18 %) ITPR3 ( 6.95 %) KDR ( 6.54 %) ITPR2 ( 6.13 %) PRKCB ( 5.11 %) PLCG1 ( 3.89 %) RASA1 ( 3.89 %) PRKCD ( 2.86 %) AHCYL1 ( 1.84 %) PRKCA ( 1.64 %) PRKCZ ( 1.02 %) VEGFA ( 1.02 %) HRAS ( 0.82 %) PDPK1 ( 0.82 %) SRC ( 0.82 %) SPHK1 ( 0.61 %) CALM2 ( 0.20 %) CALM3 ( 0.20 %)	0.0351435	0.116257	0.470507	0.0320003	0.585792	0.0840684	0.0944355	0.10614	0.104685	0.134744	0.657557	0.138955	0.266993	0.161069	0.242761	0.312037	0.285819	0.827873	0.193181	0.107592	0.933627	0.292753	0.170565	0.186594	0.703217	0.138955	0.163793	0.193181	0.198412	0.163793	0.78666	0.253763	0.789417	0.914877	0.210058	0.147315	0.927653	0.315385	0.220268
TP53 Regulates Transcription Of Genes Involved In Cytochrome C Release	187	19	114205	103.038	385	0.572464	3.69275e-15	1.9268e-12	58.7013	TP53 (61.76 %) ATM (32.52 %) CREBBP (14.31 %) TP63 ( 4.29 %) BAX ( 3.27 %) TP53BP2 ( 2.86 %) ZNF420 ( 2.45 %) PPP1R13B ( 2.04 %) TP73 ( 1.23 %) STEAP3 ( 1.02 %) BNIP3L ( 0.82 %) TP53INP1 ( 0.61 %) AIFM2 ( 0.41 %) BID ( 0.41 %) TP53AIP1 ( 0.41 %) TRIAP1 ( 0.20 %)	0.0245368	0.0822413	0.356945	0.0223313	0.457755	0.059156	0.0665636	0.0749581	0.0739129	0.0956154	0.524865	0.098674	0.194008	0.114813	0.175598	0.228733	0.208439	0.705306	0.13848	0.0760021	0.847949	0.213784	0.121782	0.133602	0.56981	0.098674	0.116809	0.13848	0.142363	0.116809	0.657937	0.183934	0.661013	0.819273	0.151035	0.10476	0.838571	0.231341	0.15867
TP53 Regulates Metabolic Genes	183	85	479684	242.021	413	0.232096	3.69733e-15	1.9268e-12	44.5521	TP53 (61.76 %) PTEN (38.24 %) MTOR ( 7.98 %) RPTOR ( 4.50 %) TP63 ( 4.29 %) TNRC6C ( 4.09 %) AGO1 ( 3.48 %) TNRC6A ( 3.48 %) TNRC6B ( 3.48 %) TSC2 ( 3.48 %) PRKAA2 ( 3.27 %) LRPPRC ( 3.07 %) MOV10 ( 3.07 %) G6PD ( 2.66 %) TSC1 ( 2.66 %) AGO3 ( 2.45 %) AKT1 ( 2.25 %) AGO4 ( 2.04 %) PRKAA1 ( 2.04 %) AKT3 ( 1.84 %) SESN2 ( 1.84 %) TXNRD1 ( 1.84 %) AKT2 ( 1.64 %) RRAGB ( 1.64 %) AGO2 ( 1.43 %) PRKAG2…	0.100674	0.306885	0.8483	0.0919564	0.92677	0.229295	0.254881	0.283084	0.279618	0.349009	0.95835	0.358361	0.601967	0.406014	0.561659	0.670218	0.631528	0.994585	0.470941	0.286534	0.999679	0.642038	0.425733	0.458027	0.972755	0.358361	0.411716	0.470941	0.48105	0.411716	0.989765	0.580279	0.990153	0.999329	0.503095	0.376663	0.999586	0.674955	0.521903
TP53 Network	182	6	27431	33.538	318	0.97689	3.79478e-15	1.9268e-12	94.0252	TP53 (61.76 %) TP63 ( 4.29 %) TP73 ( 1.23 %) MYC ( 1.02 %) TNFSF10 ( 0.61 %)	0.00585386	0.0200775	0.0990853	0.00532311	0.134668	0.0143074	0.0161471	0.0182453	0.0179832	0.0234713	0.161269	0.0242528	0.0496942	0.0284102	0.0446086	0.0595335	0.0537432	0.2508	0.0346131	0.0185072	0.359261	0.0552572	0.0302235	0.0333241	0.180736	0.0242528	0.0289286	0.0346131	0.0356431	0.0289286	0.223938	0.0469005	0.225593	0.332558	0.0379565	0.0258139	0.350134	0.0602861	0.0400082
Formation Of Senescence Associated Heterochromatin Foci (SAHF)	210	17	84842	85.9289	368	0.631709	3.88408e-15	1.9268e-12	65.4891	TP53 (61.76 %) RB1 (20.65 %) EP400 ( 9.41 %) CABIN1 ( 4.09 %) HIRA ( 2.66 %) UBN1 ( 2.66 %) LMNB1 ( 1.84 %) HIST1H1A ( 1.64 %) HIST1H1B ( 1.23 %) HIST1H1C ( 1.23 %) HIST1H1E ( 1.23 %) HIST1H1D ( 1.02 %) ASF1A ( 0.61 %) CDKN1A ( 0.41 %) HMGA1 ( 0.20 %) HMGA2 ( 0.20 %)	0.0189867	0.0640762	0.288721	0.0172757	0.37641	0.0459621	0.0517634	0.0583502	0.0575294	0.0746179	0.436849	0.0770337	0.153313	0.0898117	0.138429	0.181602	0.165035	0.610457	0.108648	0.0591704	0.766222	0.169389	0.0953464	0.104756	0.478416	0.0770337	0.0913965	0.108648	0.111749	0.0913965	0.562975	0.145159	0.566011	0.732883	0.118688	0.0818463	0.755172	0.183738	0.12481
APC Truncation Mutants Have Impaired AXIN Binding// AXIN Missense Mutants Destabilize The Destruction Complex// Beta Catenin Phosphorylation Cascade// Misspliced GSK3beta Mutants Stabilize Beta Catenin// S33 Mutants Of Beta Catenin Aren't Phosphorylated// S37 Mutants Of Beta Catenin Aren't Phosphorylated// S45 Mutants Of Beta Catenin Aren't Phosphorylated// T41 Mutants Of Beta Catenin Aren't Phos…	142	17	113923	106.154	430	0.607531	4.02439e-15	1.9268e-12	63.7209	APC (83.44 %) CTNNB1 (18.81 %) AMER1 (11.45 %) GSK3B ( 3.27 %) PPP2R1A ( 2.86 %) PPP2R5A ( 2.04 %) AXIN1 ( 1.84 %) PPP2R5E ( 1.43 %) PPP2R5B ( 1.23 %) PPP2R5D ( 1.23 %) PPP2R1B ( 0.82 %) PPP2R5C ( 0.82 %) CSNK1A1 ( 0.61 %) PPP2CA ( 0.61 %) PPP2CB ( 0.61 %) FRAT1 ( 0.20 %)	0.025623	0.0857669	0.369554	0.0233211	0.472437	0.0617255	0.0694428	0.0781849	0.0770967	0.0996826	0.540461	0.102864	0.201766	0.119641	0.182706	0.237665	0.216694	0.721019	0.14422	0.0792719	0.860266	0.22222	0.126882	0.139157	0.58578	0.102864	0.121716	0.14422	0.148249	0.121716	0.674004	0.191339	0.677067	0.832621	0.157246	0.109192	0.851249	0.240358	0.165163
TP53 Regulates Transcription Of Several Additional Cell Death Genes Whose Specific Roles In P53 Dependent Apoptosis Remain Uncertain	188	14	83208	86.4591	334	0.586936	4.11101e-15	1.9268e-12	85.3293	TP53 (61.76 %) TP63 ( 4.29 %) BCL6 ( 3.07 %) TP53BP2 ( 2.86 %) PPP1R13B ( 2.04 %) RABGGTA ( 1.84 %) RABGGTB ( 1.84 %) TP73 ( 1.23 %) BCL2L14 ( 1.02 %) CHM ( 1.02 %) NDRG1 ( 0.61 %) BIRC5 ( 0.41 %) TP53I3 ( 0.41 %) PERP ( 0.20 %)	0.0191486	0.0646094	0.290804	0.017423	0.378939	0.0463484	0.0521971	0.0588374	0.0580099	0.0752353	0.439625	0.0776702	0.154525	0.0905486	0.139533	0.183012	0.16633	0.613605	0.10953	0.0596641	0.769127	0.170715	0.0961262	0.105608	0.481329	0.0776702	0.0921457	0.10953	0.112655	0.0921457	0.566077	0.146312	0.569117	0.7359	0.119645	0.0825208	0.758119	0.185163	0.125813
Signaling By FGFR4 In Disease	124	11	79600	83.742	355	0.627285	4.21043e-15	1.9268e-12	51.5493	KRAS (44.38 %) PIK3CA (41.92 %) PIK3R1 (10.22 %) NRAS ( 8.18 %) PLCG1 ( 3.89 %) GAB1 ( 3.27 %) SOS1 ( 3.07 %) FGFR4 ( 2.25 %) GRB2 ( 2.25 %) FRS2 ( 1.02 %) HRAS ( 0.82 %)	0.0183259	0.0618965	0.280158	0.0166739	0.365978	0.0443839	0.0499913	0.0563594	0.0555657	0.0720936	0.425374	0.074431	0.148349	0.086798	0.133908	0.17582	0.159728	0.59734	0.105039	0.0571524	0.753976	0.163956	0.0921564	0.101269	0.466353	0.074431	0.0883322	0.105039	0.108044	0.0883322	0.550081	0.140436	0.553097	0.720204	0.114767	0.0790881	0.742766	0.177896	0.120701
Signaling By FGFR3 Fusions In Cancer	122	10	69957	76.1861	349	0.66095	4.33416e-15	1.9268e-12	51.0029	KRAS (44.38 %) PIK3CA (41.92 %) PIK3R1 (10.22 %) NRAS ( 8.18 %) FGFR3 ( 4.70 %) GAB1 ( 3.27 %) SOS1 ( 3.07 %) GRB2 ( 2.25 %) FRS2 ( 1.02 %) HRAS ( 0.82 %)	0.0161239	0.054607	0.250913	0.0146689	0.329995	0.0391138	0.0440708	0.0497046	0.0490022	0.0636444	0.385483	0.0657176	0.131619	0.0766977	0.118692	0.156286	0.141825	0.55043	0.0929263	0.0504065	0.708421	0.145621	0.0814608	0.089569	0.424168	0.0657176	0.0780611	0.0929263	0.0956032	0.0780611	0.504373	0.124533	0.507294	0.673523	0.101597	0.0698504	0.696776	0.158154	0.106892
G Alpha (12/13) Signalling Events	251	75	583526	268.918	349	0.113205	4.36856e-15	1.9268e-12	41.5473	PIK3CA (41.92 %) OBSCN (16.56 %) PIK3R1 (10.22 %) KALRN ( 7.57 %) TRIO ( 7.16 %) TIAM1 ( 6.95 %) MCF2 ( 6.75 %) ROCK1 ( 5.52 %) VAV3 ( 5.52 %) AKAP13 ( 4.70 %) RASGRF2 ( 4.70 %) TIAM2 ( 4.70 %) ARHGEF7 ( 4.50 %) ARHGEF11 ( 4.29 %) PLXNB1 ( 4.29 %) VAV1 ( 4.29 %) ECT2 ( 3.89 %) FGD1 ( 3.89 %) ITSN1 ( 3.89 %) VAV2 ( 3.89 %) NGEF ( 3.48 %) ABR ( 3.07 %) ARHGEF1 ( 3.07 %) ARHGEF18 ( 3.07 %) SOS1 ( 3.…	0.123541	0.36589	0.904019	0.112971	0.961174	0.27651	0.306237	0.338719	0.334743	0.413424	0.980744	0.423878	0.681721	0.476562	0.641186	0.748066	0.710827	0.998474	0.546695	0.342671	0.999954	0.721042	0.49807	0.532904	0.988637	0.423878	0.4828	0.546695	0.557434	0.4828	0.996634	0.660029	0.996792	0.999886	0.580675	0.444229	0.999937	0.752556	0.600308
Apoptosis	331	8	43881	48.8257	310	0.802713	4.40429e-15	1.9268e-12	96.7742	TP53 (61.76 %) MYC ( 1.02 %) BCL2L11 ( 0.82 %) DIABLO ( 0.61 %) TNFSF10 ( 0.61 %) JUN ( 0.41 %) TNF ( 0.20 %)	0.00913856	0.0312171	0.150548	0.00831124	0.202422	0.0222821	0.025134	0.028383	0.0279775	0.0364584	0.240428	0.0376639	0.0766104	0.0440678	0.0688716	0.0915166	0.0827552	0.363339	0.0535938	0.0287884	0.501451	0.0850489	0.0468561	0.0516171	0.267815	0.0376639	0.0448653	0.0535938	0.0551722	0.0448653	0.327285	0.0723621	0.329527	0.468583	0.0587141	0.0400704	0.490302	0.0926533	0.0618512
Signaling By FGFR3 Point Mutants In Cancer	123	22	118457	108.393	352	0.511539	4.4073e-15	1.9268e-12	48.2955	KRAS (44.38 %) PIK3CA (41.92 %) PIK3R1 (10.22 %) NRAS ( 8.18 %) FGFR3 ( 4.70 %) PLCG1 ( 3.89 %) GAB1 ( 3.27 %) SOS1 ( 3.07 %) GRB2 ( 2.25 %) FGF23 ( 1.43 %) FGF5 ( 1.43 %) FGF2 ( 1.02 %) FGF20 ( 1.02 %) FRS2 ( 1.02 %) FGF8 ( 0.82 %) HRAS ( 0.82 %) FGF1 ( 0.61 %) FGF16 ( 0.61 %) FGF17 ( 0.61 %) FGF18 ( 0.61 %) FGF9 ( 0.20 %)	0.0264183	0.088342	0.378636	0.0240458	0.482943	0.063604	0.0715472	0.0805426	0.0794229	0.102652	0.551564	0.105922	0.207405	0.123163	0.187877	0.244145	0.222689	0.732001	0.148402	0.0816609	0.868654	0.228344	0.130601	0.143205	0.597107	0.105922	0.125294	0.148402	0.152538	0.125294	0.685298	0.196723	0.688347	0.841773	0.161769	0.112426	0.859903	0.246899	0.169891
RAF Activation	110	25	162612	135.513	340	0.399499	4.40854e-15	1.9268e-12	66.1765	KRAS (44.38 %) BRAF (21.06 %) JAK2 ( 9.82 %) NRAS ( 8.18 %) KSR1 ( 3.68 %) PPP2R1A ( 2.86 %) RAF1 ( 2.66 %) MAP3K11 ( 2.45 %) ARAF ( 2.04 %) PPP2R5A ( 2.04 %) MAP2K1 ( 1.84 %) MARK3 ( 1.84 %) PPP2R5E ( 1.43 %) PPP2R5B ( 1.23 %) PPP2R5D ( 1.23 %) BRAP ( 0.82 %) HRAS ( 0.82 %) PHB ( 0.82 %) PPP2R1B ( 0.82 %) PPP2R5C ( 0.82 %) SRC ( 0.82 %) PPP2CA ( 0.61 %) PPP2CB ( 0.61 %) YWHAB ( 0.61 %) MAP2K2 ( …	0.0370797	0.122369	0.489077	0.0337664	0.605792	0.0885733	0.0994652	0.111754	0.110227	0.141747	0.677555	0.146157	0.279665	0.169301	0.254492	0.326334	0.29919	0.844065	0.202846	0.113278	0.943003	0.306375	0.179229	0.195971	0.722785	0.146157	0.17215	0.202846	0.208304	0.17215	0.804386	0.265927	0.807055	0.925874	0.220447	0.154911	0.937572	0.329796	0.231085
TRAIL Signaling Pathway	346	25	161543	130.863	278	0.327228	4.42404e-15	1.9268e-12	65.4676	PIK3CA (41.92 %) PIK3R1 (10.22 %) MAP2K4 ( 6.95 %) CHUK ( 4.70 %) CASP8 ( 3.68 %) MAPK8 ( 2.86 %) SMPD1 ( 1.84 %) TNFRSF10C ( 1.84 %) IKBKB ( 1.64 %) CASP10 ( 1.43 %) TNFRSF10A ( 1.43 %) TRAF2 ( 1.43 %) RIPK1 ( 1.23 %) TNFRSF10B ( 1.23 %) PIK3CB ( 1.02 %) CFLAR ( 0.61 %) DAP3 ( 0.61 %) MAPK1 ( 0.61 %) MAPK3 ( 0.61 %) TNFRSF10D ( 0.61 %) TNFSF10 ( 0.61 %) TRADD ( 0.61 %) IKBKG ( 0.41 %) FADD ( 0.2…	0.0351121	0.116158	0.470201	0.0319717	0.58546	0.0839952	0.0943538	0.106049	0.104595	0.13463	0.657223	0.138838	0.266786	0.160935	0.242569	0.311803	0.2856	0.827597	0.193023	0.1075	0.933463	0.29253	0.170424	0.186441	0.702889	0.138838	0.163657	0.193023	0.19825	0.163657	0.78636	0.253564	0.789119	0.914686	0.209889	0.147192	0.92748	0.315149	0.220092
EGF Signaling Pathway ( EGF Signaling Pathway Diagram )	28	13	87575	83.9389	321	0.582542	4.44349e-15	1.9268e-12	75.0779	KRAS (44.38 %) EGFR (16.56 %) NRAS ( 8.18 %) SOS1 ( 3.07 %) SOS2 ( 2.86 %) RAF1 ( 2.66 %) SHC1 ( 2.45 %) GRB2 ( 2.25 %) EGF ( 1.23 %) HRAS ( 0.82 %) SHC3 ( 0.82 %) SHC2 ( 0.61 %)	0.018385	0.0620915	0.280927	0.0167277	0.366918	0.0445251	0.0501498	0.0565375	0.0557414	0.0723195	0.426409	0.0746639	0.148794	0.0870677	0.134313	0.176338	0.160204	0.59853	0.105362	0.0573329	0.755096	0.164443	0.092442	0.101582	0.467442	0.0746639	0.0886065	0.105362	0.108376	0.0886065	0.551248	0.140859	0.554266	0.721362	0.115119	0.0793349	0.7439	0.17842	0.121069
TP53 Regulates Transcription Of Genes Involved In G2 Cell Cycle Arrest	134	18	81837	83.8698	346	0.615471	4.45452e-15	1.9268e-12	74.8555	TP53 (61.76 %) EP300 ( 9.20 %) RBL2 ( 4.70 %) RBL1 ( 3.68 %) BAX ( 3.27 %) TFDP1 ( 2.04 %) AURKA ( 1.64 %) CCNB1 ( 1.64 %) ZNF385A ( 1.64 %) CDK1 ( 1.43 %) CDC25C ( 1.23 %) PCNA ( 1.02 %) PRMT1 ( 1.02 %) TFDP2 ( 1.02 %) CARM1 ( 0.41 %) E2F4 ( 0.41 %) SFN ( 0.20 %)	0.0183642	0.062023	0.280657	0.0167088	0.366588	0.0444755	0.0500941	0.0564749	0.0556797	0.0722401	0.426046	0.074582	0.148637	0.0869729	0.13417	0.176156	0.160037	0.598112	0.105249	0.0572695	0.754703	0.164272	0.0923417	0.101472	0.46706	0.074582	0.0885101	0.105249	0.108259	0.0885101	0.550839	0.140711	0.553856	0.720956	0.114995	0.0792482	0.743502	0.178236	0.12094
PTK6 Regulates RHO GTPases// RAS GTPase And MAP Kinases	109	26	203379	149.698	340	0.356264	4.48624e-15	1.9268e-12	60.8824	KRAS (44.38 %) NF1 (21.06 %) NRAS ( 8.18 %) DOCK1 ( 5.52 %) ELMO1 ( 5.11 %) ARHGAP35 ( 4.29 %) RASA1 ( 3.89 %) RASA2 ( 3.68 %) DAB2IP ( 3.48 %) RASAL2 ( 3.27 %) SYNGAP1 ( 2.86 %) RHOA ( 2.45 %) RASA3 ( 2.04 %) SPRED2 ( 2.04 %) ELMO2 ( 1.64 %) RASAL1 ( 1.64 %) SPRED1 ( 1.64 %) RASAL3 ( 1.43 %) BCAR1 ( 1.02 %) SPRED3 ( 1.02 %) HRAS ( 0.82 %) PTK6 ( 0.61 %) RAC1 ( 0.41 %) PXN ( 0.20 %)	0.0434576	0.142287	0.545994	0.0395862	0.665326	0.10332	0.115907	0.130076	0.128317	0.164513	0.735757	0.169559	0.320049	0.195964	0.292023	0.371549	0.341669	0.88754	0.234006	0.131831	0.965563	0.349598	0.207251	0.226232	0.778782	0.169559	0.199205	0.234006	0.240169	0.199205	0.853184	0.304775	0.855537	0.953095	0.253855	0.179561	0.961672	0.375345	0.265813
Integrin Signalling Pathway	73	156	1189525	362.168	429	0.073547	4.49041e-15	1.9268e-12	23.0769	PIK3CA (41.92 %) BRAF (21.06 %) COL6A3 (12.27 %) COL12A1 (11.66 %) COL11A1 (10.63 %) PIK3R1 (10.22 %) LAMA1 (10.02 %) FN1 ( 9.41 %) NRAS ( 8.18 %) LAMA2 ( 7.57 %) COL5A1 ( 7.36 %) LAMA3 ( 7.36 %) COL14A1 ( 6.95 %) MAP2K4 ( 6.95 %) PIK3CG ( 6.95 %) COL27A1 ( 6.75 %) COL3A1 ( 6.54 %) FLNB ( 6.54 %) LAMA4 ( 6.54 %) COL4A5 ( 6.34 %) FLNA ( 6.13 %) LAMB4 ( 6.13 %) DOCK1 ( 5.52 %) COL1A2 ( 5.32 %) PIK3…	0.239676	0.611935	0.992326	0.220498	0.99883	0.489606	0.53222	0.576583	0.571276	0.669946	0.999727	0.682051	0.907349	0.739498	0.88114	0.942997	0.924089	0.999999	0.806807	0.581824	1	0.929555	0.761248	0.794393	0.999909	0.682051	0.745907	0.806807	0.816196	0.745907	0.999993	0.893744	0.999993	1	0.835687	0.704945	1	0.945088	0.85127
Raf Activation Signaling (through Grb2 And Sos) ( B Cell Receptor Signaling )// Raf Activation Signaling (through Grb2 And Sos) ( CD4 T Cell Receptor Signaling (ERK Cascade) )// Raf Activation Signaling (through Grb2 And Sos) ( CD4 T Cell Receptor Signaling )// Raf Activation Signaling (through Grb2 And Sos) ( JAK STAT Pathway And Regulation Pathway Diagram )	111	9	56284	64.6389	317	0.690565	4.55637e-15	1.9268e-12	73.5016	KRAS (44.38 %) BRAF (21.06 %) NRAS ( 8.18 %) SOS1 ( 3.07 %) SOS2 ( 2.86 %) RAF1 ( 2.66 %) GRB2 ( 2.25 %) ARAF ( 2.04 %) HRAS ( 0.82 %)	0.012993	0.0441738	0.207399	0.0118189	0.275446	0.0315912	0.0356127	0.0401881	0.0396174	0.051532	0.324128	0.053222	0.107334	0.0621845	0.0966572	0.127791	0.115784	0.474397	0.0754694	0.0407585	0.629004	0.118932	0.0660789	0.0727173	0.358576	0.053222	0.0632988	0.0754694	0.0776652	0.0632988	0.431492	0.101477	0.434189	0.593679	0.0825867	0.0565929	0.617129	0.129345	0.0869393
VEGFR3 Signaling In Lymphatic Endothelium	301	26	202730	150.916	300	0.298386	4.60321e-15	1.9268e-12	56.6667	PIK3CA (41.92 %) PIK3R1 (10.22 %) FN1 ( 9.41 %) MAP2K4 ( 6.95 %) COL1A2 ( 5.32 %) FLT4 ( 3.68 %) COL1A1 ( 3.48 %) ITGA4 ( 3.48 %) ITGA5 ( 3.48 %) SOS1 ( 3.07 %) VEGFC ( 2.86 %) ITGA1 ( 2.45 %) ITGB1 ( 2.45 %) SHC1 ( 2.45 %) AKT1 ( 2.25 %) GRB2 ( 2.25 %) ITGA2 ( 2.25 %) PRRT2 ( 1.84 %) RPS6KA1 ( 1.84 %) MAPK14 ( 1.64 %) CREB1 ( 0.61 %) MAPK1 ( 0.61 %) MAPK3 ( 0.61 %)	0.0440324	0.144067	0.550819	0.0401109	0.670246	0.104642	0.117379	0.131714	0.129935	0.166542	0.740472	0.171644	0.323588	0.198334	0.295323	0.375486	0.345382	0.890816	0.236764	0.13349	0.967097	0.353372	0.209738	0.228912	0.783251	0.171644	0.201609	0.236764	0.242987	0.201609	0.856946	0.308186	0.859269	0.954997	0.256805	0.181755	0.963327	0.379309	0.268876
PDGF Signaling Pathway ( PDGF Signaling Pathway )	284	15	93268	88.1944	301	0.533125	4.60927e-15	1.9268e-12	74.0864	KRAS (44.38 %) PDGFRA (10.43 %) NRAS ( 8.18 %) PDGFRB ( 4.09 %) SOS1 ( 3.07 %) SOS2 ( 2.86 %) RAF1 ( 2.66 %) SHC1 ( 2.45 %) GRB2 ( 2.25 %) HRAS ( 0.82 %) SHC3 ( 0.82 %) PDGFA ( 0.61 %) SHC2 ( 0.61 %) PDGFB ( 0.41 %)	0.0196826	0.0663677	0.297635	0.0179094	0.387217	0.0476224	0.0536273	0.0604437	0.0595943	0.0772706	0.448693	0.0797685	0.158513	0.092977	0.143168	0.187651	0.170592	0.623818	0.112435	0.0612923	0.778467	0.175076	0.0986959	0.108416	0.490833	0.0797685	0.0946147	0.112435	0.115637	0.0946147	0.576164	0.150108	0.579217	0.745622	0.1228	0.0847441	0.7676	0.18985	0.129118
Pre NOTCH Transcription And Translation	289	29	320666	200.431	381	0.278961	4.66142e-15	1.9268e-12	55.3806	TP53 (61.76 %) CREBBP (14.31 %) EP300 ( 9.20 %) NOTCH2 ( 6.54 %) NOTCH1 ( 5.93 %) NOTCH3 ( 5.93 %) TNRC6C ( 4.09 %) RBPJ ( 3.89 %) NOTCH4 ( 3.68 %) AGO1 ( 3.48 %) TNRC6A ( 3.48 %) TNRC6B ( 3.48 %) MAMLD1 ( 3.27 %) MOV10 ( 3.07 %) AGO3 ( 2.45 %) KAT2B ( 2.45 %) MAML1 ( 2.25 %) AGO4 ( 2.04 %) MAML2 ( 2.04 %) SNW1 ( 2.04 %) TFDP1 ( 2.04 %) AGO2 ( 1.43 %) E2F3 ( 1.23 %) MAML3 ( 1.23 %) KAT2A ( 1.02 %…	0.071262	0.225385	0.731234	0.0649991	0.83819	0.165949	0.18534	0.206948	0.204279	0.258496	0.890792	0.265934	0.473674	0.304359	0.437085	0.538323	0.501225	0.973641	0.35826	0.209609	0.996321	0.511181	0.320532	0.347386	0.918749	0.265934	0.309019	0.35826	0.366828	0.309019	0.958926	0.453855	0.960015	0.993848	0.385691	0.280586	0.995604	0.542954	0.401985
Activation Of RAS In B Cells	3	5	30820	39.7373	258	0.812421	4.69409e-15	1.9268e-12	90.6977	KRAS (44.38 %) NRAS ( 8.18 %) RASGRP3 ( 2.66 %) RASGRP1 ( 2.04 %) HRAS ( 0.82 %)	0.00713578	0.0244357	0.11951	0.00648918	0.161742	0.0174243	0.0196607	0.0222103	0.0218919	0.0285553	0.193067	0.0295035	0.0602803	0.034545	0.0541424	0.0721347	0.0651619	0.296867	0.0420581	0.0225285	0.418975	0.0669859	0.0367424	0.0404977	0.215854	0.0295035	0.0351733	0.0420581	0.0433046	0.0351733	0.265996	0.0569094	0.267905	0.389305	0.0461033	0.0313971	0.408864	0.0730404	0.0485841
AKT(PKB) Activation Signaling ( IGF1 Signaling Pathway )// AKT(PKB) Activation Signaling ( Insulin Receptor Signaling (D. Melanogaster) )// AKT(PKB) Activation Signaling ( PDGF Signaling Pathway )	4	7	70244	76.4175	223	0.465112	4.7036e-15	1.9268e-12	88.7892	PIK3CA (41.92 %) AKT1 ( 2.25 %) PIK3CD ( 2.25 %) AKT3 ( 1.84 %) AKT2 ( 1.64 %) PIK3CB ( 1.02 %) PDPK1 ( 0.82 %)	0.0161895	0.0548247	0.2518	0.0147286	0.331095	0.0392711	0.0442475	0.0499034	0.0491982	0.0638969	0.386709	0.0659781	0.132122	0.0769999	0.119148	0.156874	0.142363	0.551902	0.0932892	0.050608	0.709892	0.146173	0.0817809	0.0899194	0.425471	0.0659781	0.0783684	0.0932892	0.0959759	0.0783684	0.505798	0.12501	0.508723	0.675019	0.101992	0.0701266	0.698257	0.158748	0.107306
RAF/MAP Kinase Cascade	114	116	756250	302.021	433	0.15645	4.73367e-15	1.9268e-12	27.9446	KRAS (44.38 %) KIT (22.90 %) EGFR (16.56 %) ERBB4 (11.45 %) AKAP9 (11.04 %) FGFR2 (10.84 %) PDGFRA (10.43 %) GRIN2A (10.02 %) JAK2 ( 9.82 %) SPTA1 ( 9.82 %) NRAS ( 8.18 %) RET ( 7.57 %) ERBB2 ( 7.36 %) NRG1 ( 6.13 %) ERBB3 ( 5.93 %) GRIN2B ( 5.93 %) SPTB ( 5.93 %) TEK ( 5.93 %) JAK3 ( 5.73 %) SPTAN1 ( 5.52 %) RAPGEF2 ( 5.32 %) SPTBN1 ( 5.11 %) FGFR3 ( 4.70 %) RASGRF2 ( 4.70 %) IRS1 ( 4.50 %) RASG…	0.156938	0.44553	0.951881	0.143752	0.985091	0.342314	0.377086	0.414579	0.410019	0.498735	0.993986	0.510269	0.772844	0.567449	0.734707	0.832161	0.799366	0.999774	0.640949	0.419104	0.999998	0.808493	0.590318	0.626744	0.996962	0.510269	0.57411	0.640949	0.651922	0.57411	0.999371	0.752602	0.999409	0.999992	0.675402	0.532548	0.999996	0.836023	0.694939
PDGFR Alpha Signaling Pathway	286	22	126537	112.884	265	0.370614	4.74894e-15	1.9268e-12	56.2264	PIK3CA (41.92 %) PDGFRA (10.43 %) PIK3R1 (10.22 %) JAK1 ( 4.09 %) PLCG1 ( 3.89 %) RAPGEF1 ( 3.89 %) ITGAV ( 3.27 %) SOS1 ( 3.07 %) SHC1 ( 2.45 %) GRB2 ( 2.25 %) PRRT2 ( 1.84 %) SHF ( 1.64 %) CSNK2A1 ( 1.43 %) CRKL ( 1.02 %) ELK1 ( 1.02 %) FOS ( 1.02 %) CAV3 ( 0.82 %) SHB ( 0.82 %) SRF ( 0.82 %) CAV1 ( 0.41 %) JUN ( 0.41 %)	0.0280509	0.0936124	0.396897	0.0255337	0.503887	0.0674536	0.0758578	0.0853698	0.0841862	0.108724	0.573551	0.112175	0.21887	0.130357	0.198403	0.257291	0.234868	0.753234	0.156935	0.0865519	0.884348	0.240782	0.138195	0.151466	0.619424	0.112175	0.132604	0.156935	0.161285	0.132604	0.707299	0.207679	0.710312	0.859043	0.170991	0.119037	0.876143	0.260167	0.179523
P53 Pathway Feedback Loops 1	163	6	47373	56.4937	321	0.754505	4.78093e-15	1.9268e-12	91.9003	TP53 (61.8 %) TP63 ( 4.3 %) MDM2 ( 1.8 %) MDM4 ( 1.2 %) RFWD2 ( 1.2 %) TP73 ( 1.2 %)	0.0109473	0.0373124	0.177688	0.00995703	0.237527	0.026657	0.0300601	0.0339348	0.0334513	0.0435539	0.280881	0.0449885	0.0911418	0.0526034	0.0820013	0.108705	0.0983887	0.418052	0.063912	0.034418	0.565942	0.101091	0.0559157	0.0615672	0.311857	0.0449885	0.0535509	0.063912	0.0657836	0.0535509	0.37832	0.0861258	0.380803	0.531409	0.069981	0.0478512	0.554278	0.110042	0.0736962
Trk Receptor Signaling Mediated By The MAPK Pathway	137	34	221130	160.94	332	0.314475	4.8309e-15	1.9268e-12	65.3614	KRAS (44.38 %) BRAF (21.06 %) NRAS ( 8.18 %) MEF2C ( 3.27 %) PRKCD ( 2.86 %) RAF1 ( 2.66 %) EGR1 ( 2.45 %) EHD4 ( 2.25 %) RPS6KA5 ( 2.25 %) MAP2K1 ( 1.84 %) MAP2K3 ( 1.84 %) MAP3K2 ( 1.84 %) RPS6KA1 ( 1.84 %) MAPK14 ( 1.64 %) RIT2 ( 1.64 %) MAP2K5 ( 1.43 %) MAPK7 ( 1.23 %) ELK1 ( 1.02 %) FOS ( 1.02 %) MAP2K6 ( 1.02 %) MAPKAPK2 ( 1.02 %) CDK5R1 ( 0.82 %) HRAS ( 0.82 %) SRF ( 0.82 %) CREB1 ( 0.61 %…	0.0489276	0.159113	0.589988	0.0445803	0.709422	0.115853	0.129854	0.145583	0.143632	0.183673	0.777465	0.189238	0.353074	0.218285	0.322888	0.408121	0.376251	0.915179	0.259915	0.147529	0.977706	0.384727	0.230663	0.251429	0.817924	0.189238	0.221842	0.259915	0.266635	0.221842	0.88539	0.336643	0.887462	0.968398	0.281531	0.200255	0.974842	0.412156	0.294519
TP53 Regulates Transcription Of Genes Involved In G1 Cell Cycle Arrest	133	13	49409	56.0516	331	0.77124	4.84927e-15	1.9268e-12	88.2175	TP53 (61.76 %) E2F7 ( 4.91 %) CCNA1 ( 3.27 %) ZNF385A ( 1.64 %) CDKN1B ( 1.43 %) CCNE1 ( 1.23 %) CDK2 ( 1.02 %) CCNA2 ( 0.82 %) ARID3A ( 0.61 %) CCNE2 ( 0.61 %) CDKN1A ( 0.41 %) PCBP4 ( 0.20 %)	0.0108399	0.0369515	0.176101	0.00985936	0.235486	0.0263977	0.0297682	0.0336059	0.033127	0.0431339	0.27854	0.044555	0.0902852	0.0520985	0.0812267	0.107693	0.0974676	0.414938	0.0633023	0.0340846	0.562357	0.100146	0.0553801	0.0609792	0.309317	0.044555	0.0530373	0.0633023	0.0651567	0.0530373	0.3754	0.0853141	0.37787	0.527894	0.0693156	0.0473909	0.550713	0.109018	0.0729969
Inflammation Mediated By Chemokine And Cytokine Signaling Pathway	227	189	1133314	351.826	443	0.100076	4.87445e-15	1.9268e-12	19.4131	KRAS (44.38 %) PIK3CA (41.92 %) PTEN (38.24 %) COL6A3 (12.27 %) COL12A1 (11.66 %) JAK2 ( 9.82 %) MYO3A ( 9.20 %) ITPR1 ( 8.18 %) NRAS ( 8.18 %) MYH11 ( 7.98 %) MYH1 ( 7.16 %) MYH3 ( 7.16 %) COL14A1 ( 6.95 %) ITPR3 ( 6.95 %) MYO3B ( 6.95 %) PIK3CG ( 6.95 %) MYH2 ( 6.54 %) MYH8 ( 6.54 %) VWF ( 6.54 %) ADCY2 ( 6.34 %) MYH9 ( 6.34 %) ITPR2 ( 6.13 %) MYLK ( 6.13 %) MYH14 ( 5.73 %) ROCK1 ( 5.52 %) ADCY…	0.222705	0.581183	0.988639	0.204697	0.997984	0.461187	0.502693	0.546228	0.541001	0.639113	0.999472	0.651301	0.887776	0.70968	0.858891	0.9282	0.906564	0.999996	0.779445	0.551395	1	0.912768	0.732044	0.766448	0.999807	0.651301	0.716254	0.779445	0.78932	0.716254	0.999981	0.87271	0.999983	1	0.809952	0.674455	1	0.930624	0.82659
Insulin Receptor Signalling Cascade	363	9	53097	61.0828	275	0.653414	4.90363e-15	1.9268e-12	83.6364	KRAS (44.38 %) NRAS ( 8.18 %) INSR ( 4.29 %) SOS1 ( 3.07 %) SHC1 ( 2.45 %) GRB2 ( 2.25 %) GRB10 ( 0.82 %) HRAS ( 0.82 %)	0.0120837	0.0411284	0.19432	0.0109913	0.258821	0.0293999	0.0331472	0.0374121	0.03688	0.0479921	0.305225	0.0495691	0.100169	0.0579355	0.0901684	0.119354	0.10809	0.450046	0.0703472	0.0379439	0.602177	0.111042	0.0615726	0.067775	0.338203	0.0495691	0.0589761	0.0703472	0.0723998	0.0589761	0.408431	0.0946822	0.41104	0.567079	0.0770018	0.0527152	0.590353	0.120813	0.0810732
P38MAPK Events	93	13	68562	72.8472	271	0.570557	4.94161e-15	1.9268e-12	87.4539	KRAS (44.38 %) NRAS ( 8.18 %) RALGDS ( 1.84 %) MAPK14 ( 1.64 %) RALA ( 1.64 %) MAPK13 ( 1.02 %) MAPKAPK2 ( 1.02 %) MAPKAPK3 ( 1.02 %) HRAS ( 0.82 %) SRC ( 0.82 %) MAPK12 ( 0.61 %) RALB ( 0.61 %)	0.01519	0.0515034	0.238175	0.0138187	0.314151	0.0368736	0.0415528	0.0468727	0.0462094	0.0600437	0.367769	0.0620036	0.124437	0.0723875	0.112169	0.147876	0.13413	0.528956	0.0877482	0.0475356	0.686675	0.137737	0.0768942	0.0845691	0.405317	0.0620036	0.0736773	0.0877482	0.0902834	0.0736773	0.483647	0.117711	0.486513	0.651481	0.0959621	0.0659111	0.674905	0.149652	0.10098
G Beta:gamma Signalling Through PI3Kgamma	58	48	245502	167.542	287	0.233759	4.9513e-15	1.9268e-12	49.8258	PIK3CA (41.92 %) PIK3R1 (10.22 %) JAK2 ( 9.82 %) PIK3CG ( 6.95 %) JAK3 ( 5.73 %) JAK1 ( 4.09 %) RHOA ( 2.45 %) SHC1 ( 2.45 %) AKT1 ( 2.25 %) CSF2RB ( 2.25 %) GRB2 ( 2.25 %) PIK3CD ( 2.25 %) GAB2 ( 2.04 %) AKT3 ( 1.84 %) IL2RG ( 1.84 %) IL3RA ( 1.84 %) AKT2 ( 1.64 %) GNB4 ( 1.64 %) IL5RA ( 1.64 %) CSF2RA ( 1.43 %) GNG12 ( 1.43 %) PIK3R6 ( 1.43 %) GNB3 ( 1.23 %) IL2RB ( 1.23 %) IL3 ( 1.23 %) IL2 ( …	0.0523168	0.169419	0.615195	0.0476761	0.733888	0.123567	0.138425	0.155096	0.15303	0.195378	0.800034	0.201252	0.372818	0.231865	0.341419	0.429804	0.396855	0.928837	0.275599	0.157157	0.982992	0.40563	0.244887	0.266698	0.83871	0.201252	0.235609	0.275599	0.282642	0.235609	0.901763	0.355738	0.903664	0.975286	0.298239	0.212873	0.980642	0.433967	0.311819
PIP3 Activates AKT Signaling	104	81	563668	267.337	365	0.135233	4.98794e-15	1.9268e-12	21.6438	PIK3CA (41.92 %) PTEN (38.24 %) KIT (22.90 %) EGFR (16.56 %) ERBB4 (11.45 %) FGFR2 (10.84 %) PDGFRA (10.43 %) PIK3R1 (10.22 %) PTPN11 ( 8.18 %) MTOR ( 7.98 %) ERBB2 ( 7.36 %) NRG1 ( 6.13 %) ERBB3 ( 5.93 %) FGFR3 ( 4.70 %) IRS1 ( 4.50 %) RICTOR ( 4.50 %) VAV1 ( 4.29 %) PDGFRB ( 4.09 %) TNRC6C ( 4.09 %) FGFR1 ( 3.89 %) AGO1 ( 3.48 %) FYN ( 3.48 %) TNRC6A ( 3.48 %) TNRC6B ( 3.48 %) GAB1 ( 3.27 %) NR…	0.1221	0.362284	0.901176	0.111646	0.959572	0.273588	0.303072	0.335305	0.331359	0.409515	0.979774	0.419908	0.677152	0.472326	0.636577	0.743704	0.706325	0.998346	0.542207	0.339228	0.999948	0.716572	0.493743	0.528456	0.987986	0.419908	0.478536	0.542207	0.552919	0.478536	0.996387	0.655431	0.996554	0.999873	0.576113	0.440149	0.999929	0.748215	0.595718
VEGFA VEGFR2 Pathway	297	60	402060	223.532	307	0.137799	5.09998e-15	1.9268e-12	46.9055	PIK3CA (41.92 %) PIK3R1 (10.22 %) KDR ( 6.54 %) DOCK1 ( 5.52 %) ROCK1 ( 5.52 %) VAV3 ( 5.52 %) ELMO1 ( 5.11 %) NCKAP1L ( 4.29 %) VAV1 ( 4.29 %) PTK2 ( 4.09 %) VAV2 ( 3.89 %) FYN ( 3.48 %) ITGAV ( 3.27 %) AXL ( 3.07 %) NCKAP1 ( 3.07 %) CYFIP1 ( 2.86 %) WASF3 ( 2.86 %) ITGB3 ( 2.66 %) RHOA ( 2.45 %) ROCK2 ( 2.45 %) PAK2 ( 2.25 %) CYFIP2 ( 2.04 %) NCF2 ( 2.04 %) PTK2B ( 2.04 %) HSP90AA1 ( 1.84 %) PR…	0.0867828	0.269195	0.800798	0.0792149	0.893171	0.199747	0.222532	0.247778	0.244668	0.307365	0.93408	0.315887	0.545314	0.359595	0.506198	0.612903	0.574364	0.988493	0.419978	0.250876	0.998975	0.584773	0.377829	0.407886	0.954153	0.315887	0.364858	0.419978	0.429473	0.364858	0.980161	0.5242	0.980805	0.998073	0.450272	0.332616	0.998724	0.617665	0.468123
Intracellular Signalling Through Adenosine Receptor A2a And Adenosine// Intracellular Signalling Through Adenosine Receptor A2b And Adenosine	75	39	272781	180.114	305	0.228753	5.21402e-15	1.9268e-12	50.4918	PIK3CA (41.92 %) BRAF (21.06 %) MAP3K4 ( 8.18 %) ADCY2 ( 6.34 %) RAPGEF2 ( 5.32 %) GNAS ( 4.91 %) CHUK ( 4.70 %) ARHGEF7 ( 4.50 %) MAPK8 ( 2.86 %) PAK1 ( 2.66 %) AKT1 ( 2.25 %) MAP2K7 ( 2.25 %) NFKB1 ( 2.04 %) RPS6KA1 ( 1.84 %) IKBKB ( 1.64 %) ATF2 ( 1.43 %) NFKB2 ( 1.43 %) RAPGEF3 ( 1.43 %) ADORA2A ( 1.02 %) ELK1 ( 1.02 %) MAP2K6 ( 1.02 %) PRKACB ( 1.02 %) PRKCZ ( 1.02 %) ADORA2B ( 0.82 %) HRAS …	0.0591449	0.18991	0.661603	0.0539158	0.777312	0.138986	0.155527	0.174042	0.17175	0.218575	0.838978	0.225044	0.410981	0.258654	0.377414	0.471321	0.436527	0.950134	0.306356	0.176328	0.99017	0.445818	0.272897	0.296678	0.873824	0.225044	0.262752	0.306356	0.314003	0.262752	0.928111	0.392749	0.929687	0.98498	0.3309	0.237823	0.988615	0.475698	0.345571
PI3K/AKT Activation	102	9	58628	66.6954	241	0.557921	5.21512e-15	1.9268e-12	71.7842	PIK3CA (41.92 %) PIK3R1 (10.22 %) IRS1 ( 4.50 %) NTRK1 ( 2.86 %) RHOA ( 2.45 %) IRS2 ( 1.23 %) NGF ( 1.23 %) PIK3CB ( 1.02 %) PIK3R2 ( 0.61 %)	0.0135305	0.0459706	0.215034	0.012308	0.285103	0.032885	0.037068	0.0418263	0.0412328	0.0536195	0.335065	0.055376	0.111545	0.0646886	0.100473	0.132744	0.120304	0.48829	0.0784858	0.0424194	0.644012	0.123566	0.068734	0.0756283	0.370329	0.055376	0.0658462	0.0784858	0.0807654	0.0658462	0.444707	0.105473	0.447451	0.608637	0.0858741	0.058879	0.632136	0.134353	0.0903912
Ras Signaling In The CD4+ TCR Pathway	116	14	87928	89.9302	322	0.55395	5.23518e-15	1.9268e-12	73.2919	KRAS (44.38 %) BRAF (21.06 %) NRAS ( 8.18 %) PRKCB ( 5.11 %) RAF1 ( 2.66 %) MAP2K1 ( 1.84 %) PRKCA ( 1.64 %) ELK1 ( 1.02 %) FOS ( 1.02 %) HRAS ( 0.82 %) PTPN7 ( 0.82 %) MAP3K8 ( 0.61 %) MAPK1 ( 0.61 %) MAPK3 ( 0.61 %)	0.0202237	0.0681467	0.304493	0.0184022	0.395495	0.0489122	0.0550749	0.0620692	0.0611977	0.0793292	0.457736	0.0818907	0.162537	0.0954319	0.146837	0.192326	0.174889	0.633895	0.11537	0.0629398	0.787549	0.179474	0.101293	0.111253	0.500289	0.0818907	0.0971105	0.11537	0.11865	0.0971105	0.586149	0.153938	0.589212	0.755112	0.125986	0.0869922	0.77683	0.194573	0.132455
T Cell Activation	129	60	380090	217.999	340	0.193024	5.27526e-15	1.9268e-12	39.7059	PIK3CA (41.92 %) BRAF (21.06 %) PIK3R1 (10.22 %) ITPR1 ( 8.18 %) NRAS ( 8.18 %) PIK3CG ( 6.95 %) PTPRC ( 5.73 %) VAV3 ( 5.52 %) PIK3C3 ( 5.32 %) CHUK ( 4.70 %) VAV1 ( 4.29 %) PLCG1 ( 3.89 %) VAV2 ( 3.89 %) PAK3 ( 3.68 %) CD3G ( 3.27 %) PRKCQ ( 3.27 %) SOS1 ( 3.07 %) MAPK8 ( 2.86 %) SOS2 ( 2.86 %) MAPK9 ( 2.66 %) PAK1 ( 2.66 %) RAF1 ( 2.66 %) ZAP70 ( 2.45 %) AKT1 ( 2.25 %) LCP2 ( 2.25 %) PAK2 ( 2.…	0.0828875	0.25837	0.785144	0.0756451	0.88136	0.191342	0.213302	0.237669	0.234665	0.295335	0.925116	0.303601	0.528198	0.346073	0.489587	0.595288	0.556972	0.985813	0.404974	0.240661	0.998584	0.567304	0.363831	0.393157	0.947024	0.303601	0.351197	0.404974	0.414262	0.351197	0.976158	0.507338	0.976897	0.997416	0.434632	0.319842	0.998256	0.600035	0.452144
Regulation Of RAS By GAPs	117	67	397302	218.109	350	0.205393	5.30011e-15	1.9268e-12	55.7143	KRAS (44.38 %) NF1 (21.06 %) NRAS ( 8.18 %) PSME4 ( 3.89 %) RASA1 ( 3.89 %) RASA2 ( 3.68 %) DAB2IP ( 3.48 %) RASAL2 ( 3.27 %) PSMD1 ( 3.07 %) SYNGAP1 ( 2.86 %) PSMC3 ( 2.04 %) RASA3 ( 2.04 %) SPRED2 ( 2.04 %) PSMB8 ( 1.84 %) PSMC5 ( 1.84 %) PSMD11 ( 1.84 %) CUL3 ( 1.64 %) KBTBD7 ( 1.64 %) PSMD6 ( 1.64 %) RASAL1 ( 1.64 %) SPRED1 ( 1.64 %) PSMA8 ( 1.43 %) PSMD13 ( 1.43 %) RASAL3 ( 1.43 %) UBC ( 1.4…	0.082964	0.258584	0.785462	0.0757152	0.881604	0.191508	0.213484	0.237868	0.234862	0.295573	0.925303	0.303844	0.528539	0.346341	0.489918	0.595641	0.55732	0.985872	0.405272	0.240863	0.998593	0.567653	0.364108	0.39345	0.947174	0.303844	0.351467	0.405272	0.414564	0.351467	0.976244	0.507674	0.97698	0.997431	0.434943	0.320095	0.998267	0.600389	0.452462
Tie2 Signaling	294	18	103645	100.87	365	0.558529	5.37179e-15	1.9268e-12	45.7534	KRAS (44.38 %) PIK3CA (41.92 %) PIK3R1 (10.22 %) NRAS ( 8.18 %) PTPN11 ( 8.18 %) TEK ( 5.93 %) GRB14 ( 3.07 %) SOS1 ( 3.07 %) ANGPT1 ( 2.45 %) ANGPT2 ( 2.45 %) SHC1 ( 2.45 %) GRB2 ( 2.25 %) ANGPT4 ( 1.84 %) PIK3CB ( 1.02 %) HRAS ( 0.82 %) DOK2 ( 0.61 %) PIK3R2 ( 0.61 %) GRB7 ( 0.41 %)	0.0237953	0.0798291	0.348202	0.0216557	0.447509	0.0573996	0.064595	0.072751	0.0717354	0.0928313	0.513927	0.0958056	0.188673	0.111505	0.170715	0.222582	0.20276	0.694085	0.134544	0.0737655	0.838932	0.207979	0.118287	0.129794	0.558567	0.0958056	0.113448	0.134544	0.138325	0.113448	0.646527	0.178845	0.649609	0.809565	0.146772	0.101725	0.829311	0.225131	0.154212
NGF Signaling Pathway ( NGF Signaling Pathway )	89	16	93133	93.6543	333	0.550917	5.39353e-15	1.9268e-12	67.2673	KRAS (44.38 %) BRAF (21.06 %) NRAS ( 8.18 %) PLCG1 ( 3.89 %) SOS1 ( 3.07 %) NTRK1 ( 2.86 %) PRKCD ( 2.86 %) SOS2 ( 2.86 %) RAF1 ( 2.66 %) SHC1 ( 2.45 %) GRB2 ( 2.25 %) ARAF ( 2.04 %) NGF ( 1.23 %) HRAS ( 0.82 %) SHC3 ( 0.82 %) SHC2 ( 0.61 %)	0.021408	0.0720319	0.319284	0.0194809	0.413242	0.0517314	0.0582384	0.0656202	0.0647007	0.0838228	0.477029	0.0865224	0.171285	0.100787	0.15482	0.202474	0.184225	0.655037	0.121766	0.0665389	0.806163	0.189026	0.106957	0.117436	0.520395	0.0865224	0.102554	0.121766	0.125215	0.102554	0.607208	0.162269	0.610286	0.774681	0.132925	0.0918978	0.79579	0.204824	0.139722
Regulation Of TP53 Activity Through Association With Co Factors	168	14	102022	99.7814	340	0.532429	5.7471e-15	1.9268e-12	81.7647	TP53 (61.76 %) TP63 ( 4.29 %) POU4F2 ( 3.27 %) TP53BP2 ( 2.86 %) AKT1 ( 2.25 %) PHF20 ( 2.04 %) PPP1R13B ( 2.04 %) AKT3 ( 1.84 %) AKT2 ( 1.64 %) BANP ( 1.64 %) ZNF385A ( 1.64 %) TP73 ( 1.23 %) PPP1R13L ( 1.02 %) POU4F1 ( 0.61 %)	0.0234271	0.0786296	0.343819	0.0213203	0.442352	0.0565267	0.0636164	0.0716536	0.0706527	0.0914462	0.508405	0.0943785	0.186013	0.109858	0.16828	0.219511	0.199926	0.688358	0.132583	0.0726534	0.834261	0.205082	0.116547	0.127897	0.552878	0.0943785	0.111774	0.132583	0.136314	0.111774	0.640724	0.176307	0.643808	0.804555	0.144649	0.100215	0.82452	0.22203	0.151991
TGF Beta Super Family Signaling Pathway(canonical) ( TGF Beta BMP Diagram(MolecularVariation) )	181	51	330075	202.731	304	0.175954	5.76329e-15	1.9268e-12	42.1053	SMAD4 (29.45 %) CREBBP (14.31 %) EP300 ( 9.20 %) BMPR2 ( 8.59 %) SMARCA4 ( 6.95 %) WT1 ( 6.13 %) ACVR2A ( 5.73 %) ACVR1B ( 5.52 %) SMAD2 ( 4.70 %) TGFBR2 ( 4.50 %) INHBA ( 3.89 %) SMAD3 ( 3.89 %) BMPR1A ( 3.48 %) TGFBR1 ( 3.48 %) BMP10 ( 2.86 %) ACVR2B ( 2.66 %) BMP7 ( 2.45 %) BMPR1B ( 2.25 %) GDF2 ( 2.25 %) MAML1 ( 2.25 %) BMP5 ( 2.04 %) GDF5 ( 2.04 %) MAML2 ( 2.04 %) BMP15 ( 1.84 %) BMP2 ( 1.84…	0.0727216	0.229583	0.738643	0.0663351	0.84434	0.169163	0.188885	0.210851	0.208138	0.263199	0.895818	0.270746	0.480812	0.30971	0.443925	0.545852	0.508552	0.975603	0.364287	0.213555	0.996735	0.518568	0.326095	0.353285	0.922974	0.270746	0.314432	0.364287	0.372955	0.314432	0.961623	0.460838	0.962662	0.99448	0.392026	0.285609	0.996083	0.550504	0.408491
Angiogenesis	8	141	980324	336.247	472	0.147284	5.78324e-15	1.9268e-12	19.2797	APC (83.44 %) PIK3CA (41.92 %) BRAF (21.06 %) CTNNB1 (18.81 %) TCF7L2 (10.63 %) PDGFRA (10.43 %) PIK3R1 (10.22 %) EPHB1 ( 8.59 %) NRAS ( 8.18 %) MAP2K4 ( 6.95 %) PIK3CG ( 6.95 %) KDR ( 6.54 %) NOTCH2 ( 6.54 %) NOTCH1 ( 5.93 %) TEK ( 5.93 %) PRKD1 ( 5.73 %) PIK3C3 ( 5.32 %) PRKCB ( 5.11 %) PIK3C2A ( 4.70 %) PRKCG ( 4.70 %) PIK3C2B ( 4.50 %) PLCG2 ( 4.50 %) PRKCI ( 4.50 %) NOS3 ( 4.29 %) JAK1 ( 4.0…	0.199599	0.536583	0.980879	0.183234	0.995852	0.421019	0.460616	0.502564	0.497504	0.593711	0.998731	0.605861	0.855278	0.664781	0.822811	0.902473	0.876913	0.999982	0.737067	0.507572	1	0.884164	0.687707	0.72342	0.999479	0.605861	0.671498	0.737067	0.747498	0.671498	0.999933	0.838237	0.999938	1	0.76948	0.629081	1	0.905389	0.787407
CD28 Dependent PI3K/Akt Signaling	12	22	160289	131.191	266	0.306978	5.8874e-15	1.9268e-12	66.1654	PIK3CA (41.92 %) PIK3R1 (10.22 %) MTOR ( 7.98 %) RICTOR ( 4.50 %) FYN ( 3.48 %) AKT1 ( 2.25 %) AKT3 ( 1.84 %) LCK ( 1.84 %) AKT2 ( 1.64 %) CD80 ( 1.23 %) MAPKAP1 ( 1.23 %) PIK3R3 ( 1.02 %) CD28 ( 0.82 %) PDPK1 ( 0.82 %) TRIB3 ( 0.82 %) MAP3K8 ( 0.61 %) PIK3R2 ( 0.61 %) PRR5 ( 0.61 %) THEM4 ( 0.61 %) CD86 ( 0.41 %) MLST8 ( 0.41 %)	0.0352489	0.116591	0.471534	0.0320964	0.586905	0.0843138	0.0947097	0.106446	0.104987	0.135126	0.658676	0.139348	0.267687	0.161519	0.243403	0.312822	0.286552	0.828795	0.193709	0.107903	0.934174	0.293501	0.171038	0.187106	0.704315	0.139348	0.16425	0.193709	0.198953	0.16425	0.787664	0.254429	0.790416	0.915515	0.210626	0.14773	0.92823	0.316177	0.22086
Tetrachlorodibenzodioxin Inhibits The Reaction [[AHR Protein Binds To CDK4 Protein// CCND1 Protein] Results In Increased Phosphorylation Of RB1 Protein]	175	4	20828	28.3307	109	0.585169	5.903e-15	1.9268e-12	92.6606	RB1 (20.65 %) AHR ( 2.04 %) CDK4 ( 0.82 %) CCND1 ( 0.41 %)	0.00482792	0.0165797	0.0824178	0.00438998	0.112397	0.0118088	0.0133293	0.0150642	0.0148475	0.019388	0.13495	0.0200349	0.0411461	0.0234781	0.0369182	0.0493373	0.0445151	0.211814	0.0286201	0.0152808	0.307142	0.0457754	0.0249806	0.0275511	0.151535	0.0200349	0.0239076	0.0286201	0.0294745	0.0239076	0.188591	0.0388231	0.190018	0.283426	0.0313941	0.0213275	0.299017	0.0499644	0.0330972
Apoptosis Signaling Pathway	333	104	663734	284.195	429	0.178841	5.93785e-15	1.9268e-12	34.0326	TP53 (61.76 %) PIK3CA (41.92 %) IGF2R ( 9.20 %) MAP2K4 ( 6.95 %) PIK3CG ( 6.95 %) APAF1 ( 5.11 %) PRKCB ( 5.11 %) CHUK ( 4.70 %) PRKCG ( 4.70 %) MAP4K4 ( 4.50 %) HSPA1L ( 4.29 %) MADD ( 4.29 %) MAP4K3 ( 3.89 %) CASP8 ( 3.68 %) DAXX ( 3.48 %) MAPK10 ( 3.48 %) BAX ( 3.27 %) BIRC3 ( 3.27 %) PRKCQ ( 3.27 %) MAP3K5 ( 2.86 %) MAPK8 ( 2.86 %) PRKCD ( 2.86 %) MAPK9 ( 2.66 %) PRKCH ( 2.66 %) AIFM1 ( 2.45 …	0.138148	0.401657	0.928802	0.12642	0.974337	0.305748	0.337824	0.372673	0.368419	0.451979	0.988361	0.462978	0.724932	0.518014	0.685125	0.78866	0.753122	0.999332	0.590176	0.376898	0.999987	0.762932	0.540283	0.576092	0.993578	0.462978	0.524484	0.590176	0.601105	0.524484	0.998371	0.703705	0.998457	0.999964	0.624643	0.484317	0.999982	0.792902	0.644397
Cyclin E Associated Events During G1/S Transition	151	14	59702	67.6264	139	0.312898	6.00821e-15	1.9268e-12	79.1367	RB1 (20.65 %) WEE1 ( 2.45 %) CDC25A ( 2.25 %) CCNH ( 1.43 %) CDKN1B ( 1.43 %) CCNE1 ( 1.23 %) PKMYT1 ( 1.23 %) CDK2 ( 1.02 %) MYC ( 1.02 %) MAX ( 0.82 %) MNAT1 ( 0.82 %) CCNE2 ( 0.61 %) CDK7 ( 0.61 %) CDKN1A ( 0.41 %)	0.0137766	0.0467927	0.218508	0.0125321	0.289485	0.0334772	0.037734	0.042576	0.0419721	0.0545745	0.340017	0.0563612	0.113468	0.0658338	0.102217	0.135003	0.122367	0.494532	0.0798646	0.0431795	0.650685	0.125681	0.069948	0.076959	0.375642	0.0563612	0.0670111	0.0798646	0.0821825	0.0670111	0.450659	0.107297	0.453423	0.615305	0.0873764	0.0599246	0.638813	0.136638	0.0919685
Signaling By FGFR2 In Disease	121	27	135656	118.854	356	0.476436	6.04592e-15	1.9268e-12	45.2247	KRAS (44.38 %) PIK3CA (41.92 %) FGFR2 (10.84 %) PIK3R1 (10.22 %) NRAS ( 8.18 %) PLCG1 ( 3.89 %) GAB1 ( 3.27 %) SOS1 ( 3.07 %) GRB2 ( 2.25 %) FGF23 ( 1.43 %) FGF5 ( 1.43 %) FGF10 ( 1.02 %) FGF2 ( 1.02 %) FGF20 ( 1.02 %) FGF3 ( 1.02 %) FGF6 ( 1.02 %) FRS2 ( 1.02 %) FGF8 ( 0.82 %) HRAS ( 0.82 %) FGF1 ( 0.61 %) FGF16 ( 0.61 %) FGF17 ( 0.61 %) FGF18 ( 0.61 %) FGF7 ( 0.61 %) FGF22 ( 0.20 %) FGF9 ( 0.20…	0.0303013	0.100842	0.421239	0.027585	0.531425	0.0727445	0.0817784	0.0919952	0.0907243	0.117043	0.602157	0.12074	0.234433	0.140197	0.212716	0.275074	0.251375	0.779822	0.168579	0.0932643	0.902988	0.257631	0.148574	0.162745	0.64823	0.12074	0.142599	0.168579	0.173218	0.142599	0.735179	0.222564	0.738125	0.87984	0.18356	0.128087	0.895523	0.278109	0.192644
IL2 Signaling Events Mediated By PI3K	68	38	227344	161.485	287	0.249751	6.06292e-15	1.9268e-12	45.6446	PIK3CA (41.92 %) PIK3R1 (10.22 %) PTPN11 ( 8.18 %) MTOR ( 7.98 %) JAK3 ( 5.73 %) EIF3A ( 4.29 %) JAK1 ( 4.09 %) SOS1 ( 3.07 %) NFATC2 ( 2.45 %) SHC1 ( 2.45 %) AKT1 ( 2.25 %) GRB2 ( 2.25 %) GAB2 ( 2.04 %) NFKB1 ( 2.04 %) HSP90AA1 ( 1.84 %) IL2RG ( 1.84 %) LCK ( 1.84 %) RELA ( 1.84 %) SMPD1 ( 1.84 %) UGCG ( 1.84 %) RPS6KB1 ( 1.64 %) TERT ( 1.64 %) MYB ( 1.43 %) IL2RB ( 1.23 %) IL2 ( 1.02 %) IL2RA (…	0.0492022	0.159951	0.592088	0.0448312	0.711483	0.11648	0.13055	0.146357	0.144397	0.184626	0.779382	0.190217	0.354694	0.219392	0.324407	0.409905	0.377944	0.916375	0.261196	0.148312	0.978189	0.386445	0.231824	0.252676	0.819701	0.190217	0.222965	0.261196	0.267943	0.222965	0.88681	0.338208	0.888868	0.969021	0.282898	0.201283	0.97537	0.413951	0.295934
FGF Signaling Pathway	45	15	111093	103.785	254	0.388698	6.13543e-15	1.9268e-12	63.3858	PIK3CA (41.92 %) FGFR2 (10.84 %) FGFR3 ( 4.70 %) FGFR1 ( 3.89 %) PLCG1 ( 3.89 %) SOS1 ( 3.07 %) SHC1 ( 2.45 %) AKT1 ( 2.25 %) FGFR4 ( 2.25 %) MAPK14 ( 1.64 %) FRS2 ( 1.02 %) FGF1 ( 0.61 %) MAPK1 ( 0.61 %) MAPK3 ( 0.61 %)	0.0247952	0.0830807	0.359965	0.0225667	0.461282	0.0597675	0.0672489	0.0757263	0.0746708	0.0965841	0.52862	0.0996719	0.195859	0.115963	0.177293	0.230866	0.21041	0.70912	0.139848	0.0767805	0.850972	0.215798	0.122997	0.134926	0.573662	0.0996719	0.117978	0.139848	0.143766	0.117978	0.661827	0.1857	0.664901	0.82254	0.152516	0.105816	0.84168	0.233495	0.160218
VEGFR1 Specific Signals	298	29	230519	163.949	276	0.226201	6.21701e-15	1.9268e-12	48.913	PIK3CA (41.92 %) PIK3R1 (10.22 %) PTPN11 ( 8.18 %) CBL ( 7.98 %) FLT1 ( 6.95 %) PRKCB ( 5.11 %) NOS3 ( 4.29 %) PLCG1 ( 3.89 %) RASA1 ( 3.89 %) NRP2 ( 2.86 %) HIF1A ( 2.45 %) AKT1 ( 2.25 %) NRP1 ( 2.04 %) HSP90AA1 ( 1.84 %) PRKCA ( 1.64 %) CD2AP ( 1.43 %) VEGFA ( 1.02 %) PDPK1 ( 0.82 %) MAPK1 ( 0.61 %) MAPK3 ( 0.61 %) PGF ( 0.61 %) SHC2 ( 0.61 %) VEGFB ( 0.61 %) CAV1 ( 0.41 %) PRKACA ( 0.41 %) CAL…	0.0504558	0.163771	0.601541	0.0459761	0.72071	0.119337	0.133725	0.149882	0.147879	0.188967	0.787931	0.194672	0.362044	0.224432	0.3313	0.417989	0.385618	0.921629	0.267022	0.15188	0.980265	0.394232	0.237103	0.258346	0.8276	0.194672	0.228074	0.267022	0.273889	0.228074	0.893079	0.345314	0.895073	0.971711	0.289106	0.205964	0.977643	0.422083	0.302365
PTK6 Promotes HIF1A Stabilization	290	6	43498	52.7755	138	0.417447	6.24378e-15	1.9268e-12	81.1594	EGFR (16.56 %) LRRK2 (12.47 %) GPNMB ( 2.45 %) HIF1A ( 2.45 %) PTK6 ( 0.61 %) HBEGF ( 0.20 %)	0.0100563	0.0343134	0.164423	0.0091463	0.220424	0.0245034	0.0276355	0.0312028	0.0307576	0.0400637	0.261222	0.0413858	0.0840093	0.0484065	0.0755541	0.100275	0.0907178	0.391703	0.0588412	0.0316477	0.535276	0.0932208	0.0514618	0.0566768	0.290494	0.0413858	0.0492804	0.0588412	0.0605691	0.0492804	0.353672	0.0793686	0.356043	0.501435	0.0644454	0.0440246	0.523821	0.101515	0.0678776
PI3K Events In ERBB4 Signaling	101	10	70703	76.7868	257	0.524647	6.2467e-15	1.9268e-12	64.9805	PIK3CA (41.92 %) ERBB4 (11.45 %) PIK3R1 (10.22 %) NRG1 ( 6.13 %) NRG3 ( 3.27 %) NRG2 ( 1.64 %) BTC ( 0.61 %) EREG ( 0.61 %) NRG4 ( 0.41 %) HBEGF ( 0.20 %)	0.0162944	0.0551729	0.253217	0.0148241	0.33285	0.0395225	0.0445301	0.0502211	0.0495116	0.0643007	0.388666	0.0663946	0.132925	0.077483	0.119878	0.157813	0.143224	0.554246	0.0938692	0.0509301	0.712228	0.147054	0.0822927	0.0904796	0.427548	0.0663946	0.0788598	0.0938692	0.0965718	0.0788598	0.508069	0.125774	0.510999	0.677397	0.102623	0.0705683	0.70061	0.159698	0.107968
Constitutive Signaling By Ligand Responsive EGFR Cancer Variants	22	19	123434	110.562	373	0.528102	6.39316e-15	1.9268e-12	42.6273	KRAS (44.38 %) PIK3CA (41.92 %) EGFR (16.56 %) PIK3R1 (10.22 %) NRAS ( 8.18 %) CBL ( 7.98 %) PLCG1 ( 3.89 %) GAB1 ( 3.27 %) SOS1 ( 3.07 %) SHC1 ( 2.45 %) GRB2 ( 2.25 %) HSP90AA1 ( 1.84 %) UBC ( 1.43 %) EGF ( 1.23 %) CDC37 ( 0.82 %) HRAS ( 0.82 %) UBA52 ( 0.61 %)	0.0272005	0.0908698	0.387449	0.0247586	0.493081	0.0654495	0.073614	0.0828574	0.0817071	0.105565	0.562231	0.108922	0.212916	0.126615	0.192935	0.250469	0.228545	0.742388	0.152499	0.0840064	0.876419	0.234325	0.134246	0.147171	0.607953	0.108922	0.128802	0.152499	0.156738	0.128802	0.696033	0.201988	0.699066	0.850292	0.166198	0.115599	0.86793	0.253283	0.174518
PDGFR Beta Signaling Pathway	96	125	847363	316.684	420	0.122624	6.40104e-15	1.9268e-12	20.9524	KRAS (44.38 %) PIK3CA (41.92 %) PTEN (38.24 %) BRAF (21.06 %) PIK3R1 (10.22 %) JAK2 ( 9.82 %) NRAS ( 8.18 %) PTPN11 ( 8.18 %) CBL ( 7.98 %) LRP1 ( 7.36 %) MAP2K4 ( 6.95 %) PIK3CG ( 6.95 %) ABL1 ( 6.34 %) IQGAP1 ( 5.52 %) DOCK4 ( 4.50 %) ARHGAP35 ( 4.29 %) PDGFRB ( 4.09 %) PLCG1 ( 3.89 %) RAPGEF1 ( 3.89 %) RASA1 ( 3.89 %) STAT5B ( 3.89 %) VAV2 ( 3.89 %) KSR1 ( 3.68 %) FYN ( 3.48 %) MAPK10 ( 3.48 %…	0.174031	0.483408	0.966563	0.159549	0.990999	0.374562	0.411477	0.451005	0.446213	0.538596	0.996744	0.550471	0.80985	0.608828	0.773753	0.864514	0.834535	0.999918	0.682471	0.455755	0.999999	0.842942	0.631916	0.668369	0.998485	0.550471	0.615568	0.682471	0.69332	0.615568	0.99974	0.790775	0.999758	0.999998	0.716393	0.573311	0.999999	0.868001	0.735442
HDR Through Single Strand Annealing (SSA)	317	37	210415	151.087	243	0.20638	6.41387e-15	1.9268e-12	55.5556	ATM (32.52 %) ATR ( 9.41 %) ABL1 ( 6.34 %) BRCA1 ( 6.34 %) BLM ( 4.91 %) RAD50 ( 4.70 %) TOPBP1 ( 4.29 %) TOP3A ( 3.68 %) WRN ( 3.48 %) BRIP1 ( 3.27 %) ERCC4 ( 2.86 %) RBBP8 ( 2.86 %) BARD1 ( 2.25 %) DNA2 ( 2.25 %) EXO1 ( 2.25 %) NBN ( 2.25 %) RPA1 ( 2.04 %) HUS1 ( 1.64 %) RAD17 ( 1.64 %) RAD9B ( 1.43 %) RFC4 ( 1.43 %) RFC5 ( 1.43 %) RMI1 ( 1.43 %) KAT5 ( 1.23 %) RAD52 ( 1.02 %) ATRIP ( 0.82 %) R…	0.0441133	0.144317	0.551493	0.0401847	0.670932	0.104828	0.117586	0.131945	0.130163	0.166827	0.741129	0.171937	0.324085	0.198666	0.295786	0.376038	0.345903	0.891269	0.237151	0.133723	0.967307	0.353902	0.210087	0.229289	0.783873	0.171937	0.201946	0.237151	0.243383	0.201946	0.857467	0.308664	0.859787	0.955258	0.257219	0.182064	0.963554	0.379865	0.269306
Processive Synthesis On The C Strand Of The Telomere// Telomere C Strand (Lagging Strand) Synthesis	215	6	25157	29.8568	81	0.433442	6.46528e-15	1.9268e-12	83.9506	LIG1 (11.45 %) POLD1 ( 3.89 %) POLD3 ( 2.86 %) PCNA ( 1.02 %) POLD2 ( 0.41 %)	0.00512386	0.0175896	0.0872553	0.00465914	0.118877	0.0125299	0.0141426	0.0159825	0.0157527	0.0205672	0.142623	0.021253	0.0436189	0.0249028	0.0391421	0.0522887	0.0471853	0.223259	0.030352	0.0162122	0.322591	0.0485192	0.0264953	0.0292193	0.160061	0.021253	0.0253581	0.030352	0.0312573	0.0253581	0.198946	0.0411592	0.200441	0.297953	0.0332909	0.0226233	0.314156	0.0529523	0.0350951
PI3K Events In ERBB2 Signaling	100	16	123605	113.59	299	0.42033	6.49024e-15	1.9268e-12	50.1672	PIK3CA (41.92 %) EGFR (16.56 %) ERBB4 (11.45 %) PIK3R1 (10.22 %) ERBB2 ( 7.36 %) NRG1 ( 6.13 %) ERBB3 ( 5.93 %) GAB1 ( 3.27 %) NRG3 ( 3.27 %) GRB2 ( 2.25 %) NRG2 ( 1.64 %) EGF ( 1.23 %) BTC ( 0.61 %) EREG ( 0.61 %) NRG4 ( 0.41 %) HBEGF ( 0.20 %)	0.0283124	0.0944546	0.399774	0.025772	0.507164	0.0680693	0.076547	0.0861413	0.0849475	0.109693	0.576975	0.113173	0.220693	0.131505	0.200077	0.259378	0.236802	0.756478	0.158295	0.0873336	0.886683	0.242757	0.139406	0.152783	0.622886	0.113173	0.13377	0.158295	0.162679	0.13377	0.71068	0.209421	0.713686	0.861631	0.172459	0.120093	0.878565	0.262273	0.181057
Constitutive Signaling By EGFRvIII	21	15	110479	105.361	373	0.549029	6.51671e-15	1.9268e-12	43.1635	KRAS (44.38 %) PIK3CA (41.92 %) EGFR (16.56 %) PIK3R1 (10.22 %) NRAS ( 8.18 %) CBL ( 7.98 %) PLCG1 ( 3.89 %) GAB1 ( 3.27 %) SOS1 ( 3.07 %) SHC1 ( 2.45 %) GRB2 ( 2.25 %) HSP90AA1 ( 1.84 %) EGF ( 1.23 %) CDC37 ( 0.82 %) HRAS ( 0.82 %)	0.0253443	0.0848631	0.36634	0.023067	0.468706	0.0610665	0.0687045	0.0773576	0.0762804	0.0986402	0.536506	0.10179	0.199782	0.118404	0.180887	0.235382	0.214583	0.717067	0.14275	0.0784336	0.857202	0.220063	0.125575	0.137734	0.581738	0.10179	0.120459	0.14275	0.146742	0.120459	0.669953	0.189444	0.673019	0.829291	0.155656	0.108057	0.848092	0.238054	0.163501
Hypoxia Response Via HIF Activation	273	16	123081	113.271	261	0.362522	6.52556e-15	1.9268e-12	53.2567	PTEN (38.24 %) VHL (15.95 %) CREBBP (14.31 %) MTOR ( 7.98 %) PARK2 ( 2.66 %) GPR37 ( 2.45 %) HIF1A ( 2.45 %) AKT1 ( 2.25 %) AKT3 ( 1.84 %) AKT2 ( 1.64 %) ARNT ( 1.43 %) EGLN2 ( 1.43 %) EGLN1 ( 1.02 %) EGLN3 ( 0.61 %) TXN ( 0.20 %) TXN2 ( 0.20 %)	0.0281941	0.0940736	0.398474	0.0256642	0.505684	0.0677908	0.0762352	0.0857923	0.0846031	0.109255	0.575429	0.112722	0.219869	0.130986	0.19932	0.258434	0.235927	0.755015	0.15768	0.0869799	0.885633	0.241864	0.138858	0.152187	0.621323	0.112722	0.133242	0.15768	0.162048	0.133242	0.709155	0.208633	0.712164	0.860466	0.171795	0.119615	0.877475	0.261321	0.180364
Posttranslational Regulation Of Adherens Junction Stability And Dissassembly	259	50	360746	213.304	305	0.155302	6.66449e-15	1.9268e-12	39.3443	CTNNB1 (18.81 %) CDH1 (17.59 %) EGFR (16.56 %) CREBBP (14.31 %) MET (10.02 %) RET ( 7.57 %) ROBO1 ( 7.57 %) TIAM1 ( 6.95 %) ABL1 ( 6.34 %) CDH2 ( 6.34 %) DSP ( 5.52 %) IQGAP1 ( 5.52 %) SLIT1 ( 5.11 %) CTNNA1 ( 4.91 %) NTRK2 ( 4.70 %) IGF1R ( 4.29 %) CTNND1 ( 3.89 %) FER ( 3.68 %) FYN ( 3.48 %) DNM2 ( 3.27 %) GFRA1 ( 3.27 %) ZBTB33 ( 3.27 %) HGS ( 2.45 %) MMP7 ( 2.04 %) JUP ( 1.84 %) MEP1B ( 1.84 …	0.0796713	0.249347	0.771351	0.0726986	0.870674	0.184364	0.205628	0.229253	0.226338	0.285285	0.916837	0.293331	0.513638	0.334738	0.475508	0.580202	0.542136	0.983148	0.392344	0.232156	0.998154	0.552387	0.352082	0.380769	0.940338	0.293331	0.33974	0.392344	0.401448	0.33974	0.972267	0.493023	0.973092	0.996712	0.421436	0.309152	0.997745	0.584928	0.438642
Phosphorylation Of Proteins Involved In G1/S Transition By Active Cyclin E:Cdk2 Complexes	97	4	17010	23.6525	109	0.663549	6.72765e-15	1.9268e-12	94.4954	RB1 (20.65 %) CCNE1 ( 1.23 %) CDK2 ( 1.02 %) CCNE2 ( 0.61 %)	0.00394466	0.0135611	0.0678355	0.00358669	0.0927835	0.00965458	0.0108993	0.0123198	0.0121424	0.0158623	0.111654	0.0163926	0.0337324	0.0192159	0.0302543	0.0404791	0.036506	0.176662	0.0234358	0.0124972	0.258936	0.037544	0.0204486	0.0225581	0.125588	0.0163926	0.0195683	0.0234358	0.0241373	0.0195683	0.156904	0.031821	0.158115	0.238283	0.0257139	0.0174523	0.251846	0.0409961	0.0271132
SMAD2/SMAD3:SMAD4 Heterotrimer Regulates Transcription	173	32	206492	152.727	246	0.207019	6.74075e-15	1.9268e-12	63.0081	SMAD4 (29.45 %) MEN1 ( 5.73 %) SMAD2 ( 4.70 %) SMAD3 ( 3.89 %) RBL1 ( 3.68 %) TGIF1 ( 3.48 %) RNF111 ( 3.07 %) CCNT1 ( 2.04 %) SNW1 ( 2.04 %) TFDP1 ( 2.04 %) CCNT2 ( 1.84 %) SERPINE1 ( 1.84 %) ATP1B4 ( 1.64 %) CDK8 ( 1.43 %) E2F5 ( 1.43 %) SP1 ( 1.43 %) UBC ( 1.43 %) WWTR1 ( 1.43 %) CDK9 ( 1.02 %) HDAC1 ( 1.02 %) MYC ( 1.02 %) TFDP2 ( 1.02 %) CCNC ( 0.82 %) TGIF2 ( 0.82 %) CCNK ( 0.61 %) UBA52 ( …	0.0448948	0.146731	0.557966	0.0408981	0.677496	0.106623	0.119585	0.134169	0.132359	0.169579	0.747394	0.174765	0.328867	0.201877	0.300249	0.381351	0.350917	0.895556	0.240885	0.135974	0.969273	0.358998	0.213457	0.232919	0.789793	0.174765	0.205203	0.240885	0.247199	0.205203	0.862414	0.313275	0.864693	0.957708	0.261213	0.185038	0.965678	0.385214	0.27345
Signalling To P38 Via RIT And RIN	127	5	21127	28.689	121	0.62507	6.74474e-15	1.9268e-12	90.0826	BRAF (21.06 %) NTRK1 ( 2.86 %) RIT2 ( 1.64 %) NGF ( 1.23 %) RIT1 ( 0.41 %)	0.00489706	0.0168157	0.0835501	0.00445286	0.113915	0.0119773	0.0135193	0.0152788	0.015059	0.0196636	0.136749	0.0203196	0.0417243	0.0238111	0.0374382	0.0500275	0.0451395	0.214502	0.029025	0.0154985	0.310782	0.0464171	0.0253347	0.027941	0.153534	0.0203196	0.0242466	0.029025	0.0298912	0.0242466	0.191022	0.0393693	0.192465	0.286846	0.0318375	0.0216304	0.302583	0.0506632	0.0335642
Oxidative Stress Induced Senescence	212	120	496461	242.065	384	0.200398	6.76429e-15	1.9268e-12	50.2604	TP53 (61.76 %) EZH2 ( 9.20 %) MAP2K4 ( 6.95 %) MAP4K4 ( 4.50 %) TNIK ( 4.50 %) TNRC6C ( 4.09 %) KDM6B ( 3.68 %) AGO1 ( 3.48 %) MAPK10 ( 3.48 %) TNRC6A ( 3.48 %) TNRC6B ( 3.48 %) RBBP7 ( 3.27 %) MOV10 ( 3.07 %) MAP3K5 ( 2.86 %) MAPK8 ( 2.86 %) PHC2 ( 2.86 %) CBX8 ( 2.66 %) MAPK9 ( 2.66 %) PHC1 ( 2.66 %) AGO3 ( 2.45 %) MAP2K7 ( 2.25 %) RING1 ( 2.25 %) AGO4 ( 2.04 %) TFDP1 ( 2.04 %) MAP2K3 ( 1.84 %)…	0.100708	0.306977	0.848404	0.0919882	0.926839	0.229368	0.254961	0.283171	0.279704	0.349111	0.958398	0.358464	0.6021	0.406126	0.56179	0.670351	0.631662	0.994596	0.471063	0.286621	0.99968	0.642172	0.425849	0.458148	0.972791	0.358464	0.41183	0.471063	0.481174	0.41183	0.989782	0.580412	0.990169	0.999331	0.503221	0.37677	0.999587	0.675088	0.522031
FAS (CD95) Signaling Pathway	337	36	252606	172.079	280	0.21143	6.77232e-15	1.9268e-12	55	PIK3CA (41.92 %) PIK3R1 (10.22 %) PTPN13 ( 5.32 %) CHUK ( 4.70 %) CASP8 ( 3.68 %) RFC1 ( 3.68 %) CLTC ( 3.48 %) MAPK10 ( 3.48 %) BIRC3 ( 3.27 %) MAPK8 ( 2.86 %) MAPK9 ( 2.66 %) AKT1 ( 2.25 %) MAP2K7 ( 2.25 %) BTK ( 2.04 %) BIRC2 ( 1.84 %) FAS ( 1.84 %) SMPD1 ( 1.84 %) IKBKB ( 1.64 %) MAPK14 ( 1.64 %) SYK ( 1.64 %) CASP10 ( 1.43 %) FAIM2 ( 1.23 %) RIPK1 ( 1.23 %) MAP2K6 ( 1.02 %) PIK3CB ( 1.02 %) …	0.0547239	0.176684	0.632201	0.0498753	0.750049	0.129021	0.144479	0.161809	0.159662	0.203614	0.814702	0.209702	0.386514	0.241396	0.35431	0.444765	0.411117	0.937204	0.286569	0.16395	0.985975	0.420086	0.254859	0.277385	0.852053	0.209702	0.245267	0.286569	0.293832	0.245267	0.91198	0.369006	0.913763	0.979257	0.309904	0.221739	0.983939	0.449009	0.323883
Spry Regulation Of FGF Signaling	128	16	96494	90.4928	173	0.281432	6.79185e-15	1.9268e-12	73.9884	BRAF (21.06 %) PTPN11 ( 8.18 %) CBL ( 7.98 %) PPP2R1A ( 2.86 %) GRB2 ( 2.25 %) UBC ( 1.43 %) SRC ( 0.82 %) MAPK1 ( 0.61 %) MAPK3 ( 0.61 %) MKNK1 ( 0.61 %) PPP2CA ( 0.61 %) PPP2CB ( 0.61 %) UBA52 ( 0.61 %)	0.0204006	0.0687277	0.306722	0.0185633	0.398178	0.0493335	0.0555478	0.0626001	0.0617215	0.0800014	0.46066	0.0825836	0.163849	0.0962333	0.148033	0.193849	0.176289	0.637131	0.116328	0.063478	0.790437	0.180907	0.102141	0.112179	0.503343	0.0825836	0.0979252	0.116328	0.119633	0.0979252	0.589363	0.155187	0.592429	0.758138	0.127025	0.0877262	0.779768	0.196112	0.133544
Homologous DNA Pairing And Strand Exchange// Resolution Of D Loop Structures Through Synthesis Dependent Strand Annealing (SDSA)	318	26	177440	137.629	237	0.236038	7.08939e-15	1.9268e-12	56.962	ATM (32.52 %) BRCA2 (12.68 %) BRCA1 ( 6.34 %) BLM ( 4.91 %) RAD50 ( 4.70 %) PALB2 ( 4.29 %) TOP3A ( 3.68 %) WRN ( 3.48 %) BRIP1 ( 3.27 %) RBBP8 ( 2.86 %) BARD1 ( 2.25 %) DNA2 ( 2.25 %) EXO1 ( 2.25 %) NBN ( 2.25 %) RTEL1 ( 1.84 %) XRCC2 ( 1.64 %) RAD51AP1 ( 1.43 %) RMI1 ( 1.43 %) KAT5 ( 1.23 %) RAD51D ( 1.23 %) XRCC3 ( 1.02 %) RAD51C ( 0.82 %) RAD51B ( 0.61 %) RMI2 ( 0.61 %)	0.0379951	0.125247	0.49764	0.0346015	0.614921	0.0906985	0.101837	0.114399	0.112839	0.145042	0.686611	0.149547	0.285589	0.173171	0.259983	0.332999	0.305434	0.851191	0.207382	0.115957	0.946969	0.312733	0.183299	0.200374	0.731594	0.149547	0.176077	0.207382	0.212945	0.176077	0.812256	0.271617	0.814882	0.930573	0.225319	0.158484	0.941782	0.336513	0.236154
Loss Of Function Of FBXW7 In Cancer And NOTCH1 Signaling	276	5	39578	48.8941	148	0.481005	7.1104e-15	1.9268e-12	85.8108	FBXW7 (24.95 %) NOTCH1 ( 5.93 %) CUL1 ( 3.27 %) SKP1 ( 0.41 %) RBX1 ( 0.20 %)	0.00915422	0.0312699	0.150786	0.00832549	0.202733	0.0223201	0.0251767	0.0284312	0.028025	0.03652	0.240787	0.0377275	0.0767371	0.0441419	0.0689859	0.0916667	0.0828915	0.363833	0.0536835	0.0288372	0.502048	0.0851888	0.0469348	0.0517036	0.268208	0.0377275	0.0449407	0.0536835	0.0552645	0.0449407	0.327744	0.072482	0.329988	0.469161	0.0588121	0.0401379	0.490893	0.0928051	0.0619543
ErbB Receptor Signaling Network	32	15	100451	94.1521	191	0.307203	7.14551e-15	1.9268e-12	66.4921	EGFR (16.56 %) ERBB4 (11.45 %) ERBB2 ( 7.36 %) NRG1 ( 6.13 %) ERBB3 ( 5.93 %) NRG3 ( 3.27 %) HSP90AA1 ( 1.84 %) NRG2 ( 1.64 %) EGF ( 1.23 %) BTC ( 0.61 %) EREG ( 0.61 %) NRG4 ( 0.41 %) HBEGF ( 0.20 %)	0.0215687	0.0725584	0.321268	0.0196273	0.415612	0.0521137	0.0586672	0.0661015	0.0651755	0.0844315	0.479597	0.0871497	0.172466	0.101512	0.155898	0.203843	0.185485	0.657812	0.122632	0.0670267	0.808563	0.190315	0.107724	0.118273	0.523062	0.0871497	0.103291	0.122632	0.126103	0.103291	0.609984	0.163394	0.613064	0.777216	0.133864	0.0925621	0.798238	0.206207	0.140704
AUF1 (hnRNP D0) Binds And Destabilizes MRNA// Autodegradation Of The E3 Ubiquitin Ligase COP1// CDK Mediated Phosphorylation And Removal Of Cdc6// CDT1 Association With The CDC6:ORC:origin Complex// Cross Presentation Of Soluble Exogenous Antigens (endosomes)// Dectin 1 Mediated Noncanonical NF KB Signaling// Degradation Of AXIN// Degradation Of DVL// Degradation Of GLI1 By The Proteasome// Degra…	145	162	849029	314.524	424	0.129712	7.14592e-15	1.9268e-12	32.0755	TP53 (61.76 %) ATM (32.52 %) RB1 (20.65 %) HECW1 ( 8.38 %) GLI3 ( 7.77 %) CHEK2 ( 5.73 %) AXIN2 ( 4.91 %) GLI2 ( 4.91 %) TNKS2 ( 4.91 %) CHUK ( 4.70 %) GLI1 ( 4.09 %) PSME4 ( 3.89 %) MRC2 ( 3.68 %) CCNA1 ( 3.27 %) CUL1 ( 3.27 %) DACT1 ( 3.27 %) EIF4G1 ( 3.27 %) GSK3B ( 3.27 %) ORC1 ( 3.27 %) PSMD1 ( 3.07 %) FBXW11 ( 2.86 %) MCM4 ( 2.86 %) PLK1 ( 2.86 %) MCM7 ( 2.66 %) CHEK1 ( 2.45 %) CDC25A ( 2.2…	0.171411	0.477724	0.964627	0.157125	0.990269	0.369681	0.406286	0.445524	0.440765	0.532646	0.99642	0.544477	0.804549	0.602698	0.768114	0.859952	0.82953	0.999904	0.676379	0.450243	0.999999	0.838052	0.625771	0.66225	0.998312	0.544477	0.609432	0.676379	0.687256	0.609432	0.999702	0.785282	0.999722	0.999998	0.710411	0.567248	0.999999	0.863498	0.72955
E Cadherin Signaling In The Nascent Adherens Junction	246	37	301335	186.846	305	0.212816	7.18313e-15	1.9268e-12	42.2951	PIK3CA (41.92 %) CTNNB1 (18.81 %) CDH1 (17.59 %) PIK3R1 (10.22 %) TIAM1 ( 6.95 %) IQGAP1 ( 5.52 %) CTNNA1 ( 4.91 %) TJP1 ( 4.29 %) CTNND1 ( 3.89 %) RAPGEF1 ( 3.89 %) VAV2 ( 3.89 %) NCKAP1 ( 3.07 %) KLHL20 ( 2.66 %) PIP5K1C ( 2.66 %) RHOA ( 2.45 %) AKT1 ( 2.25 %) ITGAE ( 2.25 %) AP1M1 ( 2.04 %) CYFIP2 ( 2.04 %) DLG1 ( 2.04 %) ITGB7 ( 1.84 %) JUP ( 1.84 %) ENAH ( 1.43 %) CTTN ( 1.02 %) WASF2 ( 1.02…	0.0630086	0.201345	0.685468	0.0574485	0.798782	0.147639	0.165108	0.184634	0.182219	0.231476	0.857652	0.238266	0.431653	0.27348	0.397012	0.493583	0.457927	0.959271	0.323273	0.187043	0.992805	0.467464	0.28837	0.313189	0.890278	0.238266	0.277766	0.323273	0.331233	0.277766	0.939815	0.412855	0.941222	0.988686	0.348804	0.251667	0.991583	0.498057	0.364034
Apoptotic Cleavage Of Cell Adhesion Proteins	334	11	83628	86.7717	193	0.347179	7.18512e-15	1.9268e-12	63.7306	CTNNB1 (18.81 %) CDH1 (17.59 %) DSP ( 5.52 %) DSG1 ( 4.29 %) TJP1 ( 4.29 %) TJP2 ( 3.07 %) DSG3 ( 2.86 %) DSG2 ( 2.45 %) PKP1 ( 2.04 %) CASP3 ( 0.82 %) OCLN ( 0.41 %)	0.0192443	0.0649247	0.292033	0.0175102	0.380431	0.0465768	0.0524535	0.0591254	0.058294	0.0756003	0.441261	0.0780465	0.155241	0.0909842	0.140185	0.183845	0.167095	0.615455	0.110051	0.0599561	0.770829	0.171498	0.0965872	0.106112	0.483045	0.0780465	0.0925886	0.110051	0.11319	0.0925886	0.567902	0.146993	0.570945	0.737669	0.120211	0.0829196	0.759846	0.186005	0.126406
ErbB4 Signaling Events	38	35	275214	185.022	310	0.224139	7.23983e-15	1.9268e-12	47.0968	PIK3CA (41.92 %) ERBB4 (11.45 %) PIK3R1 (10.22 %) JAK2 ( 9.82 %) ERBB2 ( 7.36 %) NCOR1 ( 6.34 %) NRG1 ( 6.13 %) GRIN2B ( 5.93 %) STAT5B ( 3.89 %) WWP1 ( 3.68 %) FYN ( 3.48 %) NRG3 ( 3.27 %) NEDD4 ( 3.07 %) LRIG1 ( 2.66 %) ADAM17 ( 2.45 %) SHC1 ( 2.45 %) WWOX ( 2.45 %) GRB2 ( 2.25 %) PRLR ( 2.04 %) DLG4 ( 1.84 %) MDM2 ( 1.84 %) STAT5A ( 1.84 %) NRG2 ( 1.64 %) CBFA2T3 ( 1.43 %) ITCH ( 1.43 %) TAB2 …	0.0619471	0.198215	0.679075	0.0564778	0.79309	0.145266	0.162482	0.181733	0.179351	0.227947	0.852741	0.234651	0.426039	0.269431	0.391682	0.487552	0.452121	0.956938	0.31866	0.184108	0.99216	0.461594	0.284146	0.308685	0.885977	0.234651	0.273666	0.31866	0.326536	0.273666	0.936799	0.40739	0.938251	0.987769	0.343926	0.247883	0.990854	0.492002	0.359006
IFN Gamma Pathway	195	43	300138	188.109	308	0.214142	7.29869e-15	1.9268e-12	40.5844	PIK3CA (41.92 %) CREBBP (14.31 %) PIK3R1 (10.22 %) JAK2 ( 9.82 %) EP300 ( 9.20 %) PTPN11 ( 8.18 %) CBL ( 7.98 %) MTOR ( 7.98 %) DAPK1 ( 5.93 %) JAK1 ( 4.09 %) RAPGEF1 ( 3.89 %) STAT1 ( 3.27 %) PRKCD ( 2.86 %) MAP3K11 ( 2.45 %) AKT1 ( 2.25 %) CAMK2G ( 2.25 %) STAT3 ( 2.04 %) MAP2K1 ( 1.84 %) CAMK2D ( 1.64 %) IFNGR1 ( 1.43 %) PTPN2 ( 1.43 %) CASP1 ( 1.23 %) IRF1 ( 1.23 %) IRF9 ( 1.23 %) PIAS1 ( 1.2…	0.0637497	0.203525	0.68986	0.0581262	0.802666	0.149292	0.166937	0.186655	0.184216	0.233932	0.860986	0.240782	0.435544	0.276297	0.400709	0.497754	0.461948	0.960825	0.326478	0.189087	0.993224	0.471528	0.291307	0.316319	0.893186	0.240782	0.280617	0.326478	0.334496	0.280617	0.941836	0.416643	0.943213	0.989286	0.352191	0.2543	0.992058	0.502246	0.367524
AKT(PKB) MTOR Signaling ( Insulin Receptor Signaling (Mammal) )// AKT(PKB) TOR Signaling ( Insulin Receptor Signaling (D. Melanogaster) )	7	15	129227	104.253	233	0.349269	7.3499e-15	1.9268e-12	68.6695	PTEN (38.24 %) MTOR ( 7.98 %) EIF4G3 ( 3.68 %) TSC2 ( 3.48 %) EIF4G1 ( 3.27 %) AKT1 ( 2.25 %) AKT3 ( 1.84 %) EIF4A2 ( 1.84 %) AKT2 ( 1.64 %) RPS6KB1 ( 1.64 %) RHEB ( 1.23 %) RPS6 ( 0.61 %)	0.0249574	0.0836075	0.361855	0.0227145	0.463486	0.0601514	0.0676791	0.0762084	0.0751465	0.0971919	0.530963	0.100298	0.19702	0.116685	0.178357	0.232203	0.211645	0.71149	0.140706	0.0772691	0.85284	0.21706	0.123759	0.135756	0.576063	0.100298	0.118712	0.140706	0.144646	0.118712	0.664248	0.186808	0.667319	0.824562	0.153444	0.106478	0.843602	0.234844	0.161189
ErbB1 Downstream Signaling	34	105	714254	294.446	411	0.144836	7.36489e-15	1.9268e-12	28.4672	KRAS (44.38 %) PIK3CA (41.92 %) BRAF (21.06 %) EGFR (16.56 %) PIK3R1 (10.22 %) NRAS ( 8.18 %) MTOR ( 7.98 %) MAP2K4 ( 6.95 %) IQGAP1 ( 5.52 %) RICTOR ( 4.50 %) VAV2 ( 3.89 %) DIAPH3 ( 3.68 %) KSR1 ( 3.68 %) PLD1 ( 3.48 %) GAB1 ( 3.27 %) MEF2C ( 3.27 %) RPS6KA3 ( 3.27 %) STAT1 ( 3.27 %) WASL ( 3.27 %) NCKAP1 ( 3.07 %) SOS1 ( 3.07 %) MAPK8 ( 2.86 %) PPP2R1A ( 2.86 %) PRKCD ( 2.86 %) MAPK9 ( 2.66 %)…	0.148705	0.426599	0.942808	0.136154	0.981058	0.326437	0.360072	0.39646	0.392027	0.478635	0.991954	0.489956	0.752846	0.546312	0.713891	0.814211	0.780155	0.999636	0.61939	0.400861	0.999995	0.789599	0.568968	0.605205	0.995774	0.489956	0.552904	0.61939	0.630369	0.552904	0.999043	0.732127	0.999098	0.999985	0.65393	0.511866	0.999993	0.818246	0.673608
Angiopoietin Receptor Tie2 Mediated Signaling	266	50	313954	197.566	309	0.194247	7.40063e-15	1.9268e-12	42.3948	PIK3CA (41.92 %) PIK3R1 (10.22 %) FN1 ( 9.41 %) PTPN11 ( 8.18 %) TEK ( 5.93 %) PLG ( 5.32 %) NOS3 ( 4.29 %) PTK2 ( 4.09 %) RASA1 ( 3.89 %) STAT5B ( 3.89 %) FYN ( 3.48 %) ITGA5 ( 3.48 %) GRB14 ( 3.07 %) MMP2 ( 3.07 %) MAPK8 ( 2.86 %) PAK1 ( 2.66 %) ANGPT1 ( 2.45 %) ANGPT2 ( 2.45 %) ITGB1 ( 2.45 %) SHC1 ( 2.45 %) AGTR1 ( 2.25 %) AKT1 ( 2.25 %) ELF1 ( 2.25 %) GRB2 ( 2.25 %) ETS1 ( 2.04 %) F2 ( 2.04 …	0.0694693	0.220208	0.721863	0.0633586	0.830317	0.161992	0.180972	0.202137	0.199522	0.252689	0.884298	0.25999	0.464788	0.297743	0.428584	0.528921	0.492093	0.971019	0.350792	0.204744	0.995742	0.501969	0.313648	0.340081	0.913251	0.25999	0.302324	0.350792	0.359235	0.302324	0.955359	0.44517	0.956513	0.992974	0.377833	0.27438	0.994935	0.533524	0.393911
ARMS Mediated Activation	9	7	44420	49.6485	131	0.421365	7.50022e-15	1.9268e-12	87.7863	BRAF (21.06 %) KIDINS220 ( 4.29 %) NTRK1 ( 2.86 %) NGF ( 1.23 %) YWHAB ( 0.61 %) RAP1A ( 0.41 %)	0.00932734	0.0318545	0.15342	0.008483	0.206157	0.0227393	0.0256489	0.0289635	0.0285498	0.0372008	0.244751	0.0384303	0.0781366	0.0449615	0.0702496	0.0933245	0.0843981	0.369277	0.0546751	0.029377	0.508602	0.0867352	0.0478049	0.0526597	0.272537	0.0384303	0.0457748	0.0546751	0.0562845	0.0457748	0.332797	0.0738071	0.335067	0.47551	0.0598954	0.0408847	0.497382	0.0944824	0.0630935
AKT(PKB) Activation Signaling ( Insulin Receptor Signaling (Mammal) )	5	13	128009	116.244	254	0.339463	7.53967e-15	1.9268e-12	73.2283	PIK3CA (41.92 %) MTOR ( 7.98 %) RICTOR ( 4.50 %) TSC2 ( 3.48 %) TSC1 ( 2.66 %) AKT1 ( 2.25 %) PIK3CD ( 2.25 %) AKT3 ( 1.84 %) AKT2 ( 1.64 %) MAPKAP1 ( 1.23 %) PIK3CB ( 1.02 %) PDPK1 ( 0.82 %) MLST8 ( 0.41 %)	0.0293063	0.0976501	0.410592	0.0266779	0.519434	0.0704072	0.0791635	0.0890696	0.0878372	0.113371	0.589745	0.11696	0.227586	0.135857	0.206415	0.267259	0.244115	0.768431	0.163447	0.0903004	0.895143	0.250222	0.143997	0.157773	0.635764	0.11696	0.138191	0.163447	0.167959	0.138191	0.723187	0.216012	0.726164	0.871046	0.178022	0.124095	0.887353	0.270225	0.186865
BMP Signaling Pathway ( TGF Beta BMP Diagram(MolecularVariation) )	220	34	245283	171.234	284	0.219727	7.55245e-15	1.9268e-12	47.8873	SMAD4 (29.45 %) CREBBP (14.31 %) EP300 ( 9.20 %) BMPR2 ( 8.59 %) SMARCA4 ( 6.95 %) WT1 ( 6.13 %) SMAD2 ( 4.70 %) SMAD3 ( 3.89 %) BMPR1A ( 3.48 %) BMP10 ( 2.86 %) BMP7 ( 2.45 %) BMPR1B ( 2.25 %) GDF2 ( 2.25 %) MAML1 ( 2.25 %) BMP5 ( 2.04 %) GDF5 ( 2.04 %) MAML2 ( 2.04 %) BMP15 ( 1.84 %) BMP2 ( 1.84 %) GDF3 ( 1.84 %) BMP3 ( 1.64 %) BMP6 ( 1.64 %) GDF6 ( 1.64 %) GDF9 ( 1.64 %) SMAD1 ( 1.64 %) SMAD9 …	0.0542709	0.175321	0.629055	0.0494614	0.747081	0.127996	0.143341	0.160548	0.158416	0.202069	0.812023	0.208117	0.383957	0.239609	0.351901	0.441977	0.408456	0.935707	0.284515	0.162675	0.985456	0.41739	0.25299	0.275384	0.849627	0.208117	0.243457	0.284515	0.291737	0.243457	0.91014	0.366527	0.911945	0.978561	0.307721	0.220077	0.983364	0.446206	0.321627
E Cadherin Signaling In Keratinocytes	245	21	167869	138.225	305	0.343713	7.65563e-15	1.9268e-12	41.3115	PIK3CA (41.92 %) CTNNB1 (18.81 %) CDH1 (17.59 %) EGFR (16.56 %) PIK3R1 (10.22 %) CTNNA1 ( 4.91 %) CASR ( 4.09 %) CTNND1 ( 3.89 %) PLCG1 ( 3.89 %) FYN ( 3.48 %) FMN1 ( 2.45 %) RHOA ( 2.45 %) AKT1 ( 2.25 %) JUP ( 1.84 %) AKT2 ( 1.64 %) PIP5K1A ( 1.23 %) SRC ( 0.82 %) VASP ( 0.82 %) ZYX ( 0.82 %) AJUBA ( 0.41 %) RAC1 ( 0.41 %)	0.0382552	0.126064	0.500049	0.0348388	0.617478	0.0913019	0.10251	0.11515	0.11358	0.145977	0.68914	0.150508	0.287264	0.174268	0.261537	0.334883	0.307199	0.853157	0.208667	0.116718	0.948045	0.31453	0.184453	0.201621	0.734047	0.150508	0.177191	0.208667	0.21426	0.177191	0.814436	0.273227	0.81705	0.931854	0.226698	0.159497	0.942926	0.338411	0.237589
Meiotic Recombination	320	85	252206	161.572	268	0.219768	7.70525e-15	1.9268e-12	47.7612	ATM (32.52 %) BRCA2 (12.68 %) MLH1 (11.25 %) TEX15 ( 7.57 %) PRDM9 ( 6.75 %) BRCA1 ( 6.34 %) BLM ( 4.91 %) RAD50 ( 4.70 %) MLH3 ( 4.50 %) TOP3A ( 3.68 %) MSH4 ( 3.27 %) RBBP8 ( 2.86 %) NBN ( 2.25 %) RPA1 ( 2.04 %) MSH5 ( 1.64 %) DMC1 ( 1.23 %) HIST2H2AC ( 1.23 %) CDK2 ( 1.02 %) HIST1H2BA ( 1.02 %) HIST1H3B ( 1.02 %) HIST1H3D ( 1.02 %) HIST1H4L ( 1.02 %) MND1 ( 1.02 %) CDK4 ( 0.82 %) HIST1H2BD ( 0…	0.0492464	0.160086	0.592424	0.0448715	0.711813	0.116581	0.130662	0.146481	0.14452	0.18478	0.779689	0.190374	0.354955	0.21957	0.324651	0.410192	0.378216	0.916566	0.261402	0.148438	0.978265	0.386721	0.23201	0.252876	0.819985	0.190374	0.223145	0.261402	0.268153	0.223145	0.887037	0.33846	0.889093	0.96912	0.283117	0.201449	0.975453	0.41424	0.296162
Validated Transcriptional Targets Of DeltaNp63 Isoforms	330	47	304273	192.09	308	0.205046	7.75559e-15	1.9268e-12	44.8052	ATM (32.52 %) FBXW7 (24.95 %) BRCA2 (12.68 %) RUNX1 ( 8.18 %) COL5A1 ( 7.36 %) NRG1 ( 6.13 %) NOTCH1 ( 5.93 %) TOP2A ( 4.70 %) FASN ( 4.50 %) TP63 ( 4.29 %) WWP1 ( 3.68 %) GSK3B ( 3.27 %) AXL ( 3.07 %) ITGA3 ( 2.66 %) HELLS ( 2.45 %) T ( 2.45 %) PPP2R5A ( 2.04 %) KRT14 ( 1.84 %) MDM2 ( 1.84 %) DLX5 ( 1.64 %) IGFBP3 ( 1.64 %) KRT5 ( 1.64 %) BDKRB2 ( 1.43 %) ITCH ( 1.43 %) STXBP4 ( 1.43 %) ADA ( 1.…	0.066121	0.210472	0.703528	0.0602952	0.814618	0.154571	0.172774	0.193098	0.190586	0.241751	0.871155	0.248791	0.447835	0.28525	0.412406	0.510895	0.474634	0.965419	0.336649	0.195604	0.994409	0.484345	0.30064	0.326255	0.901999	0.248791	0.289682	0.336649	0.344848	0.289682	0.947869	0.428622	0.94915	0.991003	0.362929	0.262676	0.993407	0.515437	0.378581
Signaling Events Mediated By VEGFR1 And VEGFR2	126	69	490534	248.12	343	0.140632	7.76336e-15	1.9268e-12	32.3615	PIK3CA (41.92 %) BRAF (21.06 %) CTNNB1 (18.81 %) PIK3R1 (10.22 %) PTPN11 ( 8.18 %) CBL ( 7.98 %) FLT1 ( 6.95 %) KDR ( 6.54 %) IQGAP1 ( 5.52 %) ROCK1 ( 5.52 %) PRKCB ( 5.11 %) CTNNA1 ( 4.91 %) NOS3 ( 4.29 %) PTK2 ( 4.09 %) PLCG1 ( 3.89 %) FYN ( 3.48 %) MYOF ( 3.48 %) DNM2 ( 3.27 %) GAB1 ( 3.27 %) ITGAV ( 3.27 %) PTPRJ ( 3.27 %) NEDD4 ( 3.07 %) FBXW11 ( 2.86 %) PRKCD ( 2.86 %) ITGB3 ( 2.66 %) RAF1 …	0.105568	0.319828	0.862321	0.0964498	0.935981	0.239549	0.26607	0.295249	0.291666	0.363222	0.964631	0.372837	0.620384	0.421714	0.579862	0.688505	0.649969	0.99586	0.487982	0.298814	0.999788	0.660459	0.441882	0.474833	0.977363	0.372837	0.42755	0.487982	0.498264	0.42755	0.991914	0.598606	0.992235	0.999539	0.520648	0.391632	0.999723	0.693208	0.539706
LRR FLII Interacting Protein 1 (LRRFIP1) Activates Type I IFN Production	199	5	49895	58.8542	164	0.445066	7.77935e-15	1.9268e-12	70.7317	CTNNB1 (18.81 %) CREBBP (14.31 %) EP300 ( 9.20 %) LRRFIP1 ( 2.86 %) IRF3 ( 0.82 %)	0.0115267	0.0392593	0.186208	0.0104843	0.248456	0.028056	0.0316348	0.0357087	0.0352004	0.0458187	0.293394	0.047326	0.095754	0.0553249	0.0861732	0.114149	0.103346	0.434586	0.0671975	0.0362167	0.584806	0.106177	0.0588033	0.0647364	0.325414	0.047326	0.05632	0.0671975	0.0691618	0.05632	0.393854	0.0904971	0.396404	0.549943	0.0735661	0.0503335	0.573046	0.115548	0.0774636
ERK Cascade ( B Cell Receptor Signaling )// ERK Cascade ( CD4 T Cell Receptor Signaling )// ERK Cascade ( FGF Signaling Pathway )// ERK Cascade ( GPCR Adenosine A2A Receptor Signaling Pathway )// ERK Cascade ( GPCR GroupI Metabotropic Glutamate Receptor Signaling Pathway )// ERK Cascade ( GPCR Signaling (G Alpha Q) )// ERK Cascade ( GPCR Signaling (G Alpha S// Epac And ERK) )// ERK Cascade ( IGF1…	39	8	49160	58.171	129	0.345884	7.7997e-15	1.9268e-12	88.3721	BRAF (21.06 %) RAF1 ( 2.66 %) ARAF ( 2.04 %) MAP2K1 ( 1.84 %) ELK1 ( 1.02 %) MAPK1 ( 0.61 %) MAPK3 ( 0.61 %) MAP2K2 ( 0.41 %)	0.0113579	0.0386923	0.183734	0.0103307	0.245287	0.0276485	0.0311761	0.0351921	0.034691	0.0451592	0.28977	0.0466453	0.0944123	0.0545326	0.0849593	0.112566	0.101904	0.429816	0.0662412	0.0356929	0.579395	0.104698	0.0579627	0.0638139	0.321491	0.0466453	0.0555139	0.0662412	0.0681785	0.0555139	0.389367	0.0892253	0.391898	0.544618	0.0725227	0.0496107	0.567659	0.113947	0.0763673
PI3 Kinase Pathway	98	38	271752	182.528	325	0.250554	7.81554e-15	1.9268e-12	35.3846	PIK3CA (41.92 %) PTEN (38.24 %) PIK3R1 (10.22 %) JAK2 ( 9.82 %) NRAS ( 8.18 %) IRS1 ( 4.50 %) INSR ( 4.29 %) NOS3 ( 4.29 %) GSK3B ( 3.27 %) INPPL1 ( 3.07 %) SOS1 ( 3.07 %) SOS2 ( 2.86 %) FOXO4 ( 2.45 %) AKT1 ( 2.25 %) GNAQ ( 2.25 %) AKT3 ( 1.84 %) GNA14 ( 1.84 %) AKT2 ( 1.64 %) FOXO1 ( 1.64 %) GNB4 ( 1.64 %) RPS6KB1 ( 1.64 %) CASP9 ( 1.43 %) GNA11 ( 1.43 %) GNB3 ( 1.23 %) PIK3CB ( 1.02 %) PIK3R3 …	0.0605135	0.193974	0.670245	0.0551671	0.785157	0.142057	0.158929	0.177805	0.175469	0.223163	0.845848	0.229747	0.418378	0.263933	0.384419	0.479306	0.444192	0.95358	0.312388	0.180135	0.991197	0.453574	0.278408	0.302564	0.879909	0.229747	0.268098	0.312388	0.320148	0.268098	0.932491	0.399939	0.934006	0.986412	0.337289	0.242749	0.989769	0.483719	0.352163
Cyclin A:Cdk2 Associated Events At S Phase Entry	24	15	63035	70.4726	145	0.313348	7.87099e-15	1.9268e-12	75.1724	RB1 (20.65 %) CCNA1 ( 3.27 %) WEE1 ( 2.45 %) CDC25A ( 2.25 %) CDC25B ( 1.84 %) CCNH ( 1.43 %) CDKN1B ( 1.43 %) CDK2 ( 1.02 %) MYC ( 1.02 %) CCNA2 ( 0.82 %) FZR1 ( 0.82 %) MAX ( 0.82 %) MNAT1 ( 0.82 %) CDK7 ( 0.61 %) CDKN1A ( 0.41 %)	0.0145401	0.0493395	0.229191	0.0132271	0.302913	0.0353128	0.0397981	0.0448987	0.0442626	0.0575319	0.355152	0.0594124	0.119408	0.0693786	0.107605	0.141979	0.128739	0.513423	0.0841303	0.0455344	0.670605	0.132212	0.0737056	0.0810764	0.391846	0.0594124	0.0706169	0.0841303	0.0865661	0.0706169	0.468726	0.112936	0.471548	0.635284	0.0920229	0.0631622	0.658775	0.143691	0.096846
Presynaptic Phase Of Homologous DNA Pairing And Strand Exchange	325	39	234446	161.947	256	0.198868	7.87558e-15	1.9268e-12	53.5156	ATM (32.52 %) BRCA2 (12.68 %) ATR ( 9.41 %) BRCA1 ( 6.34 %) BLM ( 4.91 %) RAD50 ( 4.70 %) TOPBP1 ( 4.29 %) TOP3A ( 3.68 %) WRN ( 3.48 %) BRIP1 ( 3.27 %) RBBP8 ( 2.86 %) CHEK1 ( 2.45 %) BARD1 ( 2.25 %) DNA2 ( 2.25 %) EXO1 ( 2.25 %) NBN ( 2.25 %) RPA1 ( 2.04 %) HUS1 ( 1.64 %) RAD17 ( 1.64 %) XRCC2 ( 1.64 %) RAD9B ( 1.43 %) RFC4 ( 1.43 %) RFC5 ( 1.43 %) RMI1 ( 1.43 %) KAT5 ( 1.23 %) RAD51D ( 1.23 %)…	0.0494359	0.160664	0.593866	0.0450446	0.713225	0.117013	0.131143	0.147015	0.145047	0.185437	0.781001	0.191049	0.35607	0.220334	0.325697	0.41142	0.379381	0.91738	0.262285	0.148978	0.978591	0.387904	0.23281	0.253736	0.8212	0.191049	0.223919	0.262285	0.269055	0.223919	0.888006	0.339538	0.890051	0.969541	0.284059	0.202158	0.97581	0.415475	0.297137
BMP2 Signaling Pathway(through Smad) ( TGF Beta BMP Diagram(MolecularVariation) )	221	13	112311	106.54	234	0.341704	7.90131e-15	1.9268e-12	59.4017	SMAD4 (29.45 %) CREBBP (14.31 %) EP300 ( 9.20 %) BMPR2 ( 8.59 %) ZNF423 ( 5.93 %) BMPR1A ( 3.48 %) BMPR1B ( 2.25 %) STAT3 ( 2.04 %) BMP2 ( 1.84 %) SMAD1 ( 1.64 %) BAMBI ( 1.02 %) SMAD7 ( 0.41 %) SMAD6 ( 0.20 %)	0.0257591	0.0862078	0.371116	0.023445	0.474249	0.062047	0.069803	0.0785886	0.0774949	0.100191	0.542379	0.103388	0.202734	0.120244	0.183593	0.238777	0.217723	0.722929	0.144937	0.0796809	0.861738	0.223271	0.127519	0.13985	0.58774	0.103388	0.122329	0.144937	0.148984	0.122329	0.675964	0.192263	0.679025	0.834223	0.158021	0.109746	0.852766	0.241481	0.165974
Negative Regulation Of The PI3K/AKT Network	88	8	77068	81.8006	208	0.405307	7.9607e-15	1.9268e-12	85.5769	PTEN (38.24 %) PHLPP1 ( 2.86 %) AKT1 ( 2.25 %) PHLPP2 ( 2.04 %) AKT3 ( 1.84 %) AKT2 ( 1.64 %) TRIB3 ( 0.82 %) THEM4 ( 0.61 %)	0.0177482	0.0599879	0.272591	0.0161478	0.356722	0.0430029	0.0484403	0.0546166	0.0538467	0.0698824	0.415158	0.072151	0.143988	0.0841566	0.129938	0.170735	0.155064	0.585519	0.101875	0.0553858	0.742753	0.15918	0.0893601	0.0982118	0.455585	0.072151	0.0856464	0.101875	0.104794	0.0856464	0.538504	0.136289	0.541499	0.708636	0.111328	0.0766714	0.731413	0.172758	0.117096
SMAD2/3 MH2 Domain Mutants In Cancer// SMAD2/3 Phosphorylation Motif Mutants In Cancer// TGFBR1 KD Mutants In Cancer	236	8	81774	85.386	202	0.373965	7.99959e-15	1.9268e-12	80.6931	SMAD4 (29.45 %) SMAD2 ( 4.70 %) TGFBR2 ( 4.50 %) ZFYVE9 ( 4.09 %) SMAD3 ( 3.89 %) TGFBR1 ( 3.48 %) FKBP1A ( 0.41 %) TGFB1 ( 0.41 %)	0.0188217	0.0635321	0.286591	0.0171254	0.37382	0.0455681	0.051321	0.0578533	0.0570392	0.0739879	0.434004	0.0763841	0.152076	0.0890597	0.137302	0.180161	0.163712	0.607221	0.107748	0.0586666	0.763221	0.168035	0.0945505	0.103886	0.475428	0.0763841	0.0906319	0.107748	0.110825	0.0906319	0.559789	0.143981	0.56282	0.72977	0.11771	0.081158	0.75213	0.182283	0.123785
PI3K Cascade	99	36	200996	152.764	286	0.272345	8.04598e-15	1.9268e-12	48.6014	PIK3CA (41.92 %) FGFR2 (10.84 %) PIK3R1 (10.22 %) PTPN11 ( 8.18 %) PIK3C3 ( 5.32 %) FGFR3 ( 4.70 %) IRS1 ( 4.50 %) FGFR1 ( 3.89 %) GAB1 ( 3.27 %) PIK3R4 ( 3.27 %) TLR9 ( 2.86 %) KL ( 2.66 %) FGFR4 ( 2.25 %) GRB2 ( 2.25 %) KLB ( 1.64 %) FGF23 ( 1.43 %) FGF5 ( 1.43 %) IRS2 ( 1.23 %) FGF10 ( 1.02 %) FGF2 ( 1.02 %) FGF20 ( 1.02 %) FGF3 ( 1.02 %) FGF6 ( 1.02 %) FRS2 ( 1.02 %) PIK3CB ( 1.02 %) FGF8 ( 0…	0.0449125	0.146786	0.558112	0.0409143	0.677644	0.106664	0.11963	0.134219	0.132409	0.169642	0.747535	0.174829	0.328976	0.20195	0.30035	0.381471	0.351031	0.895652	0.24097	0.136026	0.969316	0.359113	0.213534	0.233001	0.789925	0.174829	0.205277	0.24097	0.247285	0.205277	0.862524	0.31338	0.864802	0.957762	0.261303	0.185106	0.965724	0.385335	0.273544
Inhibition Of Replication Initiation Of Damaged DNA By RB1/E2F1	157	12	73302	76.8639	138	0.254157	8.18496e-15	1.93666e-12	84.7826	RB1 (20.65 %) PPP2R1A ( 2.86 %) POLA1 ( 2.45 %) TFDP1 ( 2.04 %) POLA2 ( 1.23 %) PPP2R3B ( 1.02 %) PRIM2 ( 1.02 %) PPP2R1B ( 0.82 %) PRIM1 ( 0.82 %) PPP2CA ( 0.61 %) PPP2CB ( 0.61 %)	0.0163163	0.0552457	0.253513	0.0148441	0.333217	0.0395751	0.0445892	0.0502876	0.0495771	0.0643852	0.389074	0.0664817	0.133093	0.077584	0.120031	0.15801	0.143403	0.554735	0.0939905	0.0509975	0.712714	0.147238	0.0823997	0.0905967	0.427981	0.0664817	0.0789625	0.0939905	0.0966964	0.0789625	0.508543	0.125933	0.511474	0.677892	0.102755	0.0706606	0.7011	0.159896	0.108107
Gene Expression Of Smad6/7 By R Smad:smad4 ( TGF Beta Super Family Signaling Pathway(canonical) )// Gene Expression Of Smad7 By R Smad:smad4 ( TGF Beta Super Family Signaling Pathway(canonical) )	156	8	91417	92.4381	183	0.2966	8.20599e-15	1.93666e-12	88.5246	SMAD4 (29.45 %) SMAD2 ( 4.70 %) SMAD3 ( 3.89 %) SMAD1 ( 1.64 %) SMAD9 ( 1.43 %) SMAD5 ( 0.82 %) SMAD7 ( 0.41 %) SMAD6 ( 0.20 %)	0.0210177	0.0707528	0.314443	0.0191254	0.407449	0.0508029	0.0571966	0.064451	0.0635473	0.0823438	0.470746	0.084998	0.168411	0.0990248	0.152196	0.199143	0.181159	0.648205	0.119663	0.0653539	0.800214	0.185889	0.105094	0.115403	0.513857	0.084998	0.100763	0.119663	0.123056	0.100763	0.600386	0.159532	0.603461	0.768409	0.130644	0.0902835	0.789724	0.201459	0.137333
Resolution Of D Loop Structures Through Holliday Junction Intermediates	327	33	219945	153.722	241	0.195281	8.29926e-15	1.93666e-12	52.2822	ATM (32.52 %) BRCA2 (12.68 %) BRCA1 ( 6.34 %) SLX4 ( 5.52 %) BLM ( 4.91 %) RAD50 ( 4.70 %) PALB2 ( 4.29 %) TOP3A ( 3.68 %) WRN ( 3.48 %) BRIP1 ( 3.27 %) RBBP8 ( 2.86 %) BARD1 ( 2.25 %) DNA2 ( 2.25 %) EXO1 ( 2.25 %) NBN ( 2.25 %) GEN1 ( 2.04 %) SPIDR ( 1.84 %) EME1 ( 1.64 %) XRCC2 ( 1.64 %) RAD51AP1 ( 1.43 %) RMI1 ( 1.43 %) KAT5 ( 1.23 %) MUS81 ( 1.23 %) RAD51D ( 1.23 %) XRCC3 ( 1.02 %) RAD51C ( 0…	0.0453727	0.148205	0.561881	0.0413344	0.681449	0.10772	0.120806	0.135527	0.1337	0.171259	0.751153	0.17649	0.331777	0.203836	0.302966	0.384579	0.353967	0.898096	0.243162	0.137349	0.970417	0.362096	0.215512	0.235132	0.793335	0.17649	0.20719	0.243162	0.249524	0.20719	0.865355	0.316082	0.86761	0.959141	0.263646	0.186853	0.966916	0.388464	0.275975
HDR Through Homologous Recombination (HRR)	316	46	263977	172.229	256	0.172135	8.29998e-15	1.93666e-12	53.125	ATM (32.52 %) BRCA2 (12.68 %) POLE ( 7.57 %) BRCA1 ( 6.34 %) BLM ( 4.91 %) RAD50 ( 4.70 %) PALB2 ( 4.29 %) POLD1 ( 3.89 %) RFC1 ( 3.68 %) TOP3A ( 3.68 %) WRN ( 3.48 %) BRIP1 ( 3.27 %) POLD3 ( 2.86 %) RBBP8 ( 2.86 %) POLH ( 2.45 %) BARD1 ( 2.25 %) DNA2 ( 2.25 %) EXO1 ( 2.25 %) NBN ( 2.25 %) POLK ( 2.25 %) RPA1 ( 2.04 %) XRCC2 ( 1.64 %) RAD51AP1 ( 1.43 %) RFC4 ( 1.43 %) RFC5 ( 1.43 %) RMI1 ( 1.43 %…	0.0548043	0.176926	0.632756	0.0499487	0.750572	0.129203	0.14468	0.162032	0.159883	0.203888	0.815173	0.209983	0.386967	0.241712	0.354736	0.445258	0.411588	0.937466	0.286933	0.164176	0.986065	0.420563	0.25519	0.27774	0.85248	0.209983	0.245588	0.286933	0.294203	0.245588	0.912303	0.369445	0.914082	0.979378	0.310291	0.222034	0.984039	0.449506	0.324283
MAPK3 (ERK1) Activation	81	10	55074	63.5639	123	0.286694	8.39367e-15	1.94062e-12	80.4878	JAK2 (9.82 %) PTPN11 (8.18 %) JAK1 (4.09 %) IL6ST (2.04 %) MAP2K1 (1.84 %) CDK1 (1.43 %) IL6 (1.43 %) IL6R (1.43 %) TYK2 (1.02 %) MAPK3 (0.61 %)	0.0127155	0.043245	0.203428	0.0115663	0.27041	0.0309227	0.0348606	0.0393414	0.0387824	0.0504526	0.318412	0.0521082	0.105152	0.0608892	0.094681	0.125224	0.113442	0.467079	0.0739085	0.0399	0.621011	0.116531	0.0647053	0.0712111	0.352423	0.0521082	0.0619811	0.0739085	0.0760607	0.0619811	0.424548	0.0994081	0.42722	0.585735	0.0808851	0.0554106	0.609145	0.126749	0.0851522
Regulation Of Cytoplasmic And Nuclear SMAD2/3 Signaling	234	20	176226	134.569	207	0.187027	8.42356e-15	1.94062e-12	81.1594	SMAD4 (29.45 %) SMAD2 ( 4.70 %) NUP214 ( 4.09 %) SMAD3 ( 3.89 %) NUP153 ( 2.04 %) TGFBRAP1 ( 2.04 %) PPM1A ( 1.43 %) CTDSPL ( 1.02 %) KPNB1 ( 0.82 %) UBE2I ( 0.82 %) CTDSP1 ( 0.61 %) CTDSP2 ( 0.61 %) KPNA2 ( 0.61 %) MAPK1 ( 0.61 %) MAPK3 ( 0.61 %) PIAS4 ( 0.41 %) CALM2 ( 0.20 %) CALM3 ( 0.20 %)	0.0366753	0.121095	0.48525	0.0333975	0.601693	0.0876335	0.0984162	0.110583	0.109072	0.140288	0.673474	0.144657	0.277035	0.167587	0.252055	0.323371	0.296416	0.840812	0.200836	0.112093	0.94116	0.30355	0.177425	0.19402	0.718804	0.144657	0.17041	0.200836	0.206246	0.17041	0.800807	0.263401	0.803495	0.923699	0.218287	0.153329	0.935618	0.326809	0.228837
Downregulation Of SMAD2/3:SMAD4 Transcriptional Activity	153	23	217149	159.398	248	0.19197	8.60622e-15	1.97023e-12	66.5323	SMAD4 (29.45 %) NCOR2 ( 6.75 %) USP9X ( 6.54 %) NCOR1 ( 6.34 %) SMAD2 ( 4.70 %) SMAD3 ( 3.89 %) TRIM33 ( 3.89 %) TGIF1 ( 3.48 %) PARP1 ( 3.07 %) RNF111 ( 3.07 %) NEDD4L ( 2.66 %) SKIL ( 1.84 %) PPM1A ( 1.43 %) SMURF2 ( 1.43 %) UBC ( 1.43 %) HDAC1 ( 1.02 %) SKI ( 0.82 %) TGIF2 ( 0.82 %) UBA52 ( 0.61 %) UBE2D1 ( 0.20 %) UBE2D3 ( 0.20 %)	0.0481549	0.15675	0.584028	0.0438747	0.70355	0.114089	0.127892	0.143404	0.14148	0.180987	0.771985	0.18648	0.348497	0.215162	0.318601	0.403074	0.371467	0.911722	0.2563	0.145323	0.97629	0.37987	0.22739	0.247911	0.812834	0.18648	0.218676	0.2563	0.262944	0.218676	0.881299	0.33222	0.883411	0.966581	0.277676	0.197357	0.973296	0.407078	0.290523
TGF Beta Receptor Signaling Activates SMADs	178	12	103443	100.735	221	0.341211	8.83835e-15	1.99294e-12	71.9457	SMAD4 (29.45 %) CBL ( 7.98 %) SMAD2 ( 4.70 %) TGFBR2 ( 4.50 %) ZFYVE9 ( 4.09 %) SMAD3 ( 3.89 %) TGFBR1 ( 3.48 %) FURIN ( 3.07 %) UBE2M ( 0.61 %) FKBP1A ( 0.41 %) TGFB1 ( 0.41 %) NEDD8 ( 0.20 %)	0.0237495	0.0796799	0.347658	0.021614	0.44687	0.057291	0.0644732	0.0726145	0.0716007	0.092659	0.513243	0.0956281	0.188343	0.1113	0.170412	0.2222	0.202408	0.693378	0.1343	0.0736271	0.838358	0.207619	0.118071	0.129558	0.557863	0.0956281	0.11324	0.1343	0.138075	0.11324	0.64581	0.178529	0.648892	0.808949	0.146509	0.101537	0.828722	0.224746	0.153936
Frs2 Mediated Activation	57	9	58465	66.5535	140	0.322957	8.86722e-15	1.99294e-12	77.1429	BRAF (21.06 %) PLCG1 ( 3.89 %) RAPGEF1 ( 3.89 %) NTRK1 ( 2.86 %) NGF ( 1.23 %) CRKL ( 1.02 %) FRS2 ( 1.02 %) YWHAB ( 0.61 %) RAP1A ( 0.41 %)	0.0134931	0.0458457	0.214506	0.012274	0.284436	0.0327951	0.0369668	0.0417125	0.0411205	0.0534745	0.33431	0.0552263	0.111253	0.0645147	0.100209	0.1324	0.11999	0.487335	0.0782763	0.042304	0.642989	0.123245	0.0685496	0.0754261	0.369519	0.0552263	0.0656693	0.0782763	0.0805502	0.0656693	0.443798	0.105195	0.446539	0.607614	0.0856458	0.0587202	0.631111	0.134006	0.0901516
PI5P// PP2A And IER3 Regulate PI3K/AKT Signaling	103	83	493126	248.835	357	0.156757	8.86969e-15	1.99294e-12	31.3725	PIK3CA (41.92 %) KIT (22.90 %) EGFR (16.56 %) ERBB4 (11.45 %) FGFR2 (10.84 %) PDGFRA (10.43 %) PIK3R1 (10.22 %) PTPN11 ( 8.18 %) ERBB2 ( 7.36 %) NRG1 ( 6.13 %) ERBB3 ( 5.93 %) FGFR3 ( 4.70 %) IRS1 ( 4.50 %) INSR ( 4.29 %) VAV1 ( 4.29 %) PDGFRB ( 4.09 %) FGFR1 ( 3.89 %) FYN ( 3.48 %) GAB1 ( 3.27 %) NRG3 ( 3.27 %) PPP2R1A ( 2.86 %) KL ( 2.66 %) PIP5K1C ( 2.66 %) AKT1 ( 2.25 %) FGFR4 ( 2.25 %) GRB2 …	0.106152	0.321361	0.86391	0.0969861	0.937003	0.240767	0.267398	0.296692	0.293095	0.364903	0.965316	0.374547	0.622531	0.423566	0.581989	0.690624	0.652114	0.995991	0.489985	0.30027	0.999798	0.6626	0.443785	0.47681	0.97786	0.374547	0.429416	0.489985	0.500285	0.429416	0.992139	0.600745	0.992453	0.99956	0.522708	0.3934	0.999736	0.695323	0.541792
Signaling By PDGF	293	27	189830	149.043	234	0.195905	8.97322e-15	2.00384e-12	52.1368	COL6A3 (12.27 %) PDGFRA (10.43 %) COL6A6 (10.22 %) COL6A5 ( 7.36 %) COL4A5 ( 6.34 %) PLG ( 5.32 %) THBS2 ( 5.32 %) COL4A4 ( 5.11 %) COL4A1 ( 4.70 %) PDGFRB ( 4.09 %) COL6A2 ( 3.48 %) COL4A2 ( 3.27 %) FURIN ( 3.07 %) THBS1 ( 3.07 %) COL4A3 ( 2.86 %) COL6A1 ( 2.86 %) COL9A1 ( 2.45 %) PDGFD ( 2.25 %) PLAT ( 2.25 %) PDGFC ( 2.04 %) COL9A2 ( 1.64 %) THBS3 ( 1.64 %) THBS4 ( 1.43 %) COL9A3 ( 1.02 %) SPP…	0.0431504	0.141335	0.543396	0.0393058	0.662668	0.102613	0.115119	0.129199	0.127451	0.163427	0.733203	0.168443	0.318151	0.194696	0.290254	0.369436	0.339677	0.88575	0.232529	0.130943	0.964714	0.347573	0.205919	0.224796	0.776357	0.168443	0.197919	0.232529	0.238659	0.197919	0.851134	0.302946	0.853503	0.952046	0.252274	0.178387	0.960758	0.373217	0.264172
EPHA2 Forward Signaling	248	19	132176	118.709	271	0.358485	9.06392e-15	2.00395e-12	55.3506	PIK3CA (41.92 %) PIK3R1 (10.22 %) CBL ( 7.98 %) TIAM1 ( 6.95 %) VAV3 ( 5.52 %) ARHGAP35 ( 4.29 %) PTK2 ( 4.09 %) VAV2 ( 3.89 %) INPPL1 ( 3.07 %) PAK1 ( 2.66 %) RHOA ( 2.45 %) SHC1 ( 2.45 %) GRB2 ( 2.25 %) EPHA2 ( 2.04 %) BCAR1 ( 1.02 %) ACP1 ( 0.82 %) SRC ( 0.82 %) RAC1 ( 0.41 %) EFNA1 ( 0.20 %)	0.0302457	0.100663	0.420648	0.0275343	0.530762	0.0726139	0.0816323	0.0918317	0.090563	0.116838	0.601473	0.120529	0.234052	0.139955	0.212365	0.274639	0.25097	0.7792	0.168293	0.0930987	0.902565	0.257218	0.148319	0.162467	0.647544	0.120529	0.142353	0.168293	0.172924	0.142353	0.734522	0.222199	0.73747	0.879364	0.183251	0.127864	0.895082	0.27767	0.192322
Integrins In Angiogenesis	275	66	566170	268.622	376	0.146047	9.13237e-15	2.00395e-12	32.4468	PIK3CA (41.92 %) COL6A3 (12.27 %) COL11A1 (10.63 %) COL6A6 (10.22 %) PIK3R1 (10.22 %) FN1 ( 9.41 %) PTPN11 ( 8.18 %) CBL ( 7.98 %) COL7A1 ( 7.98 %) COL5A1 ( 7.36 %) COL6A5 ( 7.36 %) COL3A1 ( 6.54 %) KDR ( 6.54 %) COL4A5 ( 6.34 %) ROCK1 ( 5.52 %) VAV3 ( 5.52 %) COL1A2 ( 5.32 %) PI4KA ( 5.32 %) COL4A4 ( 5.11 %) COL4A1 ( 4.70 %) COL5A2 ( 4.70 %) PIK3C2A ( 4.70 %) COL4A6 ( 4.50 %) IRS1 ( 4.50 %) TGFB…	0.12327	0.365213	0.903489	0.112721	0.960877	0.275961	0.305642	0.338077	0.334107	0.41269	0.980565	0.423132	0.680865	0.475767	0.640322	0.74725	0.709984	0.998451	0.545853	0.342024	0.999953	0.720205	0.497258	0.532069	0.988517	0.423132	0.481999	0.545853	0.556587	0.481999	0.996589	0.659168	0.996749	0.999884	0.57982	0.443463	0.999936	0.751744	0.599447
ERBB2 Regulates Cell Motility	36	15	103476	100.757	194	0.284525	9.1389e-15	2.00395e-12	63.9175	EGFR (16.56 %) ERBB4 (11.45 %) ERBB2 ( 7.36 %) NRG1 ( 6.13 %) ERBB3 ( 5.93 %) NRG3 ( 3.27 %) RHOA ( 2.45 %) NRG2 ( 1.64 %) DIAPH1 ( 1.23 %) EGF ( 1.23 %) MEMO1 ( 1.23 %) BTC ( 0.61 %) EREG ( 0.61 %) NRG4 ( 0.41 %) HBEGF ( 0.20 %)	0.023757	0.0797043	0.347747	0.0216208	0.446974	0.0573088	0.0644931	0.0726368	0.0716227	0.0926871	0.513355	0.0956571	0.188397	0.111333	0.170461	0.222263	0.202465	0.693493	0.13434	0.0736497	0.838452	0.207678	0.118106	0.129596	0.557978	0.0956571	0.113274	0.13434	0.138116	0.113274	0.645927	0.178581	0.64901	0.809049	0.146552	0.101568	0.828818	0.224809	0.153981
FOXM1 Transcription Factor Network	314	43	236224	165.531	261	0.197762	9.33629e-15	2.018e-12	45.2107	RB1 (20.65 %) CREBBP (14.31 %) BRCA2 (12.68 %) CENPF ( 9.61 %) EP300 ( 9.20 %) LAMA4 ( 6.54 %) CHEK2 ( 5.73 %) ESR1 ( 4.29 %) MMP2 ( 3.07 %) NFATC3 ( 3.07 %) ETV5 ( 2.86 %) PLK1 ( 2.86 %) XRCC1 ( 2.04 %) CDC25B ( 1.84 %) MAP2K1 ( 1.84 %) CCNB1 ( 1.64 %) CDK1 ( 1.43 %) FOXM1 ( 1.43 %) SP1 ( 1.43 %) CCNE1 ( 1.23 %) GSK3A ( 1.23 %) CCNB2 ( 1.02 %) CDK2 ( 1.02 %) CDKN2A ( 1.02 %) FOS ( 1.02 %) HIST1H…	0.0512703	0.166246	0.607572	0.0467201	0.726552	0.12119	0.135784	0.152166	0.150136	0.191777	0.793313	0.197557	0.366779	0.227692	0.335745	0.423187	0.390559	0.924868	0.270786	0.154192	0.981508	0.399244	0.240518	0.262011	0.83255	0.197557	0.231379	0.270786	0.277731	0.231379	0.896968	0.349894	0.898921	0.973335	0.293116	0.208993	0.979008	0.427312	0.306516
ERBB2 Activates PTK6 Signaling// Signaling By ERBB4	35	13	91539	92.5249	188	0.307899	9.35104e-15	2.018e-12	65.9574	EGFR (16.56 %) ERBB4 (11.45 %) ERBB2 ( 7.36 %) NRG1 ( 6.13 %) ERBB3 ( 5.93 %) NRG3 ( 3.27 %) NRG2 ( 1.64 %) EGF ( 1.23 %) BTC ( 0.61 %) EREG ( 0.61 %) PTK6 ( 0.61 %) NRG4 ( 0.41 %) HBEGF ( 0.20 %)	0.0210455	0.0708438	0.314788	0.0191507	0.407863	0.0508689	0.0572707	0.0645342	0.0636293	0.082449	0.471195	0.0851065	0.168615	0.0991502	0.152383	0.19938	0.181377	0.648695	0.119813	0.0654382	0.800643	0.186112	0.105226	0.115547	0.514325	0.0851065	0.10089	0.119813	0.12321	0.10089	0.600875	0.159726	0.60395	0.768861	0.130806	0.0903983	0.790161	0.201699	0.137503
Growth Hormone Signaling Pathway(JAK2 STAT5) ( Growth Hormone Signaling(JAK2 STAT5) )	64	9	43553	51.6301	107	0.316481	9.36929e-15	2.018e-12	79.4393	JAK2 (9.82 %) PTPN11 (8.18 %) STAT5B (3.89 %) GHR (1.84 %) STAT5A (1.84 %) GH1 (1.02 %) SOCS3 (0.82 %) SOCS2 (0.41 %)	0.00978716	0.033406	0.160376	0.00890139	0.215185	0.0238523	0.0269023	0.0303764	0.0299428	0.0390074	0.255181	0.0402954	0.0818448	0.0471356	0.0735986	0.0977145	0.0883889	0.383515	0.0573047	0.0308097	0.525598	0.0908309	0.0501129	0.0551952	0.283914	0.0402954	0.0479872	0.0573047	0.058989	0.0479872	0.34604	0.0773185	0.348375	0.492013	0.0627676	0.0428662	0.514223	0.0989238	0.0661136
ERK Cascade ( CD4 T Cell Receptor Signaling (ERK Cascade) )	40	10	74162	79.5357	146	0.263791	9.49088e-15	2.03216e-12	81.5068	BRAF (21.06 %) MAPK10 ( 3.48 %) MAPK8 ( 2.86 %) MAPK9 ( 2.66 %) RAF1 ( 2.66 %) ARAF ( 2.04 %) MAP2K1 ( 1.84 %) MAPK1 ( 0.61 %) MAPK3 ( 0.61 %) MAP2K2 ( 0.41 %)	0.0170847	0.0577926	0.263809	0.0155437	0.345931	0.0414155	0.046657	0.0526123	0.0518699	0.0673382	0.403208	0.0695273	0.138955	0.0811157	0.125359	0.16486	0.149678	0.571523	0.0982284	0.0533541	0.729241	0.153665	0.0861402	0.0946898	0.442959	0.0695273	0.0825541	0.0982284	0.101049	0.0825541	0.524849	0.131504	0.527818	0.694767	0.107364	0.07389	0.717764	0.16682	0.11294
Signaling Events Mediated By Focal Adhesion Kinase	125	63	486599	247.827	338	0.134767	9.5989e-15	2.04318e-12	37.8698	PIK3CA (41.92 %) BRAF (21.06 %) PIK3R1 (10.22 %) MAP2K4 ( 6.95 %) MYLK ( 6.13 %) DOCK1 ( 5.52 %) ELMO1 ( 5.11 %) ARHGEF7 ( 4.50 %) ARHGAP35 ( 4.29 %) ARHGEF11 ( 4.29 %) TLN1 ( 4.29 %) PTK2 ( 4.09 %) PLCG1 ( 3.89 %) RAPGEF1 ( 3.89 %) RASA1 ( 3.89 %) ACTN2 ( 3.68 %) FYN ( 3.48 %) ITGA5 ( 3.48 %) ITGAV ( 3.27 %) WASL ( 3.27 %) ASAP1 ( 3.07 %) SOS1 ( 3.07 %) MAPK8 ( 2.86 %) ACTA1 ( 2.66 %) ACTN1 ( 2.…	0.105329	0.3192	0.861666	0.0962304	0.935559	0.239051	0.265527	0.294659	0.291082	0.362534	0.964347	0.372136	0.619503	0.420956	0.578989	0.687634	0.649089	0.995805	0.487161	0.298218	0.999784	0.65958	0.441103	0.474023	0.977157	0.372136	0.426785	0.487161	0.497435	0.426785	0.99182	0.597728	0.992145	0.999531	0.519804	0.390908	0.999717	0.692339	0.538851
MTOR Signaling Pathway	83	66	458106	236.345	363	0.186361	9.65459e-15	2.04318e-12	50.9642	KRAS (44.38 %) BRAF (21.06 %) NRAS ( 8.18 %) MTOR ( 7.98 %) RB1CC1 ( 4.91 %) IRS1 ( 4.50 %) RICTOR ( 4.50 %) RPTOR ( 4.50 %) PPARGC1A ( 4.29 %) PLD1 ( 3.48 %) TSC2 ( 3.48 %) CLIP1 ( 3.27 %) FBXW11 ( 2.86 %) RAF1 ( 2.66 %) TSC1 ( 2.66 %) ULK1 ( 2.66 %) EEF2K ( 2.45 %) AKT1 ( 2.25 %) PML ( 2.25 %) ULK2 ( 2.25 %) BTRC ( 1.84 %) MAP2K1 ( 1.84 %) RPS6KA1 ( 1.84 %) SGK1 ( 1.84 %) IKBKB ( 1.64 %) PLD2 (…	0.0962608	0.295065	0.834512	0.0879069	0.917384	0.21998	0.2447	0.271994	0.268637	0.33599	0.951773	0.345092	0.584688	0.391569	0.544661	0.652903	0.614161	0.993112	0.455173	0.275335	0.999535	0.624666	0.410851	0.442495	0.967829	0.345092	0.397141	0.455173	0.465108	0.397141	0.987357	0.56313	0.987814	0.99906	0.486803	0.362923	0.999407	0.657661	0.505348
Validated Targets Of C MYC Transcriptional Repression	139	63	416109	218.216	293	0.127981	9.719e-15	2.04492e-12	48.8055	SMAD4 (29.45 %) EP300 ( 9.20 %) ERBB2 ( 7.36 %) BRCA1 ( 6.34 %) COL1A2 ( 5.32 %) SMAD2 ( 4.70 %) DNMT3A ( 4.50 %) PDGFRB ( 4.09 %) SMAD3 ( 3.89 %) RBL1 ( 3.68 %) ITGB4 ( 3.48 %) TSC2 ( 3.48 %) CEBPA ( 3.27 %) CSDE1 ( 3.27 %) ITGA6 ( 3.27 %) TJP2 ( 3.07 %) ITGB1 ( 2.45 %) DNTT ( 2.25 %) CLU ( 1.84 %) DKK1 ( 1.84 %) NFYC ( 1.84 %) GFI1 ( 1.64 %) WNT5A ( 1.64 %) CDKN1B ( 1.43 %) SP1 ( 1.43 %) TMEM12…	0.0830379	0.25879	0.785769	0.0757829	0.881839	0.191668	0.213659	0.238061	0.235053	0.295803	0.925483	0.304078	0.528869	0.346599	0.490238	0.595982	0.557655	0.985927	0.40556	0.241057	0.998602	0.567991	0.364376	0.393732	0.947318	0.304078	0.351729	0.40556	0.414856	0.351729	0.976326	0.507999	0.977061	0.997445	0.435243	0.320339	0.998277	0.60073	0.452769
Interleukin Signaling Pathway	74	86	472862	245.538	341	0.142635	9.82268e-15	2.05486e-12	39.2962	PIK3CA (41.92 %) BRAF (21.06 %) NRAS ( 8.18 %) MTOR ( 7.98 %) JAK3 ( 5.73 %) RPS6KA2 ( 4.91 %) CHUK ( 4.70 %) IRS1 ( 4.50 %) NOS3 ( 4.29 %) IL12RB2 ( 3.89 %) RASA1 ( 3.89 %) STAT5B ( 3.89 %) RPS6KA6 ( 3.68 %) IL13RA2 ( 3.48 %) MAPK6 ( 3.48 %) GSK3B ( 3.27 %) RPS6KA3 ( 3.27 %) STAT1 ( 3.27 %) SOS1 ( 3.07 %) SOS2 ( 2.86 %) RAF1 ( 2.66 %) SHC1 ( 2.45 %) AKT1 ( 2.25 %) STAT2 ( 2.25 %) STAT4 ( 2.25 %)…	0.103476	0.314317	0.856485	0.094529	0.932189	0.235176	0.261301	0.290067	0.286534	0.357176	0.962067	0.36668	0.612607	0.415045	0.572164	0.680804	0.642191	0.995356	0.480755	0.293583	0.999747	0.652693	0.435026	0.467704	0.975494	0.36668	0.420825	0.480755	0.490966	0.420825	0.991056	0.590861	0.991404	0.999459	0.513211	0.385269	0.999671	0.685523	0.532168
Insulin Pathway	360	47	311648	196.112	286	0.163862	1.0004e-14	2.08083e-12	44.4056	PIK3CA (41.92 %) PIK3R1 (10.22 %) PTPN11 ( 8.18 %) CBL ( 7.98 %) IRS1 ( 4.50 %) PRKCI ( 4.50 %) INSR ( 4.29 %) EXOC4 ( 3.89 %) RAPGEF1 ( 3.89 %) RASA1 ( 3.89 %) EXOC1 ( 3.27 %) GRB14 ( 3.07 %) SOS1 ( 3.07 %) EXOC6 ( 2.86 %) INPP5D ( 2.66 %) SHC1 ( 2.45 %) SORBS1 ( 2.45 %) AKT1 ( 2.25 %) GRB2 ( 2.25 %) PTPN1 ( 1.84 %) SGK1 ( 1.84 %) AKT2 ( 1.64 %) EXOC2 ( 1.64 %) F2RL2 ( 1.64 %) RPS6KB1 ( 1.64 %) …	0.0685705	0.217603	0.717049	0.0625361	0.826233	0.160004	0.178777	0.199718	0.19713	0.249764	0.880903	0.256996	0.460283	0.294407	0.42428	0.524142	0.487458	0.969609	0.34702	0.202298	0.995418	0.497292	0.310176	0.336392	0.91036	0.256996	0.298948	0.34702	0.355399	0.298948	0.953458	0.44077	0.954645	0.992491	0.373862	0.271252	0.994563	0.528729	0.389828
Prolactin	106	105	697471	294.407	371	0.100426	1.04846e-14	2.1684e-12	22.6415	PIK3CA (41.92 %) BRAF (21.06 %) RB1 (20.65 %) EGFR (16.56 %) CREBBP (14.31 %) ERBB4 (11.45 %) PIK3R1 (10.22 %) JAK2 ( 9.82 %) EP300 ( 9.20 %) PTPN11 ( 8.18 %) CBL ( 7.98 %) MTOR ( 7.98 %) ERBB2 ( 7.36 %) PIK3CG ( 6.95 %) FLNA ( 6.13 %) PRKCB ( 5.11 %) RPS6KA2 ( 4.91 %) CENPJ ( 4.50 %) IRS1 ( 4.50 %) ESR1 ( 4.29 %) VAV1 ( 4.29 %) JAK1 ( 4.09 %) PTK2 ( 4.09 %) STAT5B ( 3.89 %) VAV2 ( 3.89 %) SLC12A…	0.148664	0.426503	0.942759	0.136116	0.981035	0.326356	0.359986	0.396368	0.391936	0.478532	0.991942	0.489852	0.752741	0.546204	0.713783	0.814117	0.780054	0.999635	0.619279	0.400768	0.999995	0.7895	0.568858	0.605094	0.995767	0.489852	0.552796	0.619279	0.630258	0.552796	0.999041	0.732021	0.999096	0.999985	0.653819	0.511761	0.999993	0.818152	0.673498
FAS Signaling Pathway	339	37	261087	179.612	252	0.147065	1.05596e-14	2.17158e-12	49.6032	EGFR (16.56 %) ERBB4 (11.45 %) GLI3 ( 7.77 %) ERBB2 ( 7.36 %) MAP2K4 ( 6.95 %) ERBB3 ( 5.93 %) APAF1 ( 5.11 %) GLI1 ( 4.09 %) CASP8 ( 3.68 %) PARP4 ( 3.68 %) DAXX ( 3.48 %) MAPK10 ( 3.48 %) PARP1 ( 3.07 %) MAP3K5 ( 2.86 %) MAPK8 ( 2.86 %) MAPK9 ( 2.66 %) FAF1 ( 2.25 %) SCIN ( 2.04 %) FAS ( 1.84 %) LMNB1 ( 1.84 %) CASP10 ( 1.43 %) CASP9 ( 1.43 %) PARP2 ( 1.43 %) PARP3 ( 1.23 %) CASP3 ( 0.82 %) CYC…	0.0588628	0.189071	0.659795	0.053658	0.775661	0.138352	0.154825	0.173266	0.170983	0.217627	0.837525	0.224072	0.409446	0.257563	0.375961	0.469661	0.434935	0.949394	0.305108	0.175542	0.989944	0.444208	0.271756	0.29546	0.872533	0.224072	0.261646	0.305108	0.31273	0.261646	0.927174	0.391258	0.928763	0.984666	0.329577	0.236805	0.988362	0.47403	0.344205
Heterotrimeric GPCR Signaling Pathway (through Glutamate// G Alpha Q And PLC Beta) ( GPCR GroupI Metabotropic Glutamate Receptor Signaling Pathway )	66	18	126203	114.142	200	0.243584	1.36214e-14	2.77393e-12	62	BRAF (21.06 %) GRM1 ( 6.75 %) GRM5 ( 6.54 %) PRKCB ( 5.11 %) PRKCG ( 4.70 %) PRKCI ( 4.50 %) PRKCQ ( 3.27 %) PRKCD ( 2.86 %) PRKCH ( 2.66 %) RAF1 ( 2.66 %) GNAQ ( 2.25 %) ARAF ( 2.04 %) PRKCA ( 1.64 %) GNB3 ( 1.23 %) PRKCE ( 1.23 %) PRKCZ ( 1.02 %) GNB5 ( 0.61 %)	0.0285176	0.0951151	0.402023	0.0259591	0.509722	0.0685524	0.0770876	0.0867465	0.0855447	0.110454	0.579643	0.113956	0.222121	0.132405	0.201389	0.261011	0.238317	0.758995	0.159361	0.0879467	0.888484	0.244304	0.140355	0.153815	0.625581	0.113956	0.134684	0.159361	0.163772	0.134684	0.713307	0.210786	0.716307	0.863629	0.173611	0.12092	0.880434	0.263921	0.182259
C MYC Pathway	11	25	143040	124.939	202	0.208655	1.3641e-14	2.77393e-12	68.8119	FBXW7 (24.95 %) TRRAP (10.84 %) GSK3B ( 3.27 %) PAK2 ( 2.25 %) PML ( 2.25 %) SUPT3H ( 2.25 %) PPP2R5A ( 2.04 %) AXIN1 ( 1.84 %) RUVBL1 ( 1.84 %) ACTL6A ( 1.43 %) KAT5 ( 1.23 %) CDKN2A ( 1.02 %) KAT2A ( 1.02 %) MYC ( 1.02 %) SUPT7L ( 1.02 %) HBP1 ( 0.82 %) MAX ( 0.82 %) RUVBL2 ( 0.82 %) TAF12 ( 0.82 %) PIN1 ( 0.61 %) PPP2CA ( 0.61 %) SKP2 ( 0.61 %) TAF9 ( 0.61 %) ZBTB17 ( 0.61 %) TAF10 ( 0.20 %)	0.0326906	0.108472	0.446066	0.0297634	0.559055	0.0783423	0.0880379	0.0989936	0.0976314	0.125811	0.630497	0.129764	0.250656	0.150547	0.227668	0.293531	0.268552	0.804979	0.180795	0.100354	0.919537	0.275152	0.159483	0.174584	0.676496	0.129764	0.15311	0.180795	0.185731	0.15311	0.761939	0.238099	0.764799	0.898613	0.196727	0.137616	0.912829	0.296726	0.206378
IFN Gamma Signaling Pathway(JAK1 JAK2 STAT1) ( IFN Gamma Signaling(JAK1 JAK2 STAT1) )	196	6	25464	33.7637	79	0.369177	1.40257e-14	2.83631e-12	84.8101	JAK2 (9.82 %) JAK1 (4.09 %) STAT1 (3.27 %) IFNGR1 (1.43 %) IFNGR2 (1.02 %) IFNG (0.61 %)	0.00589936	0.0202325	0.099818	0.0053645	0.135643	0.0144182	0.0162719	0.0183862	0.0181222	0.0236521	0.162418	0.0244395	0.0500718	0.0286285	0.0449484	0.0599835	0.0541507	0.252485	0.0348782	0.0186502	0.361481	0.0556758	0.0304555	0.0335795	0.182009	0.0244395	0.0291508	0.0348782	0.0359159	0.0291508	0.225471	0.0472574	0.227135	0.334658	0.0382467	0.0260125	0.352314	0.0607416	0.0403138
Regulation Of IFNG Signaling	204	14	65351	69.5633	123	0.247525	1.10427e-13	2.22074e-11	80.4878	JAK2 (9.82 %) PTPN11 (8.18 %) JAK1 (4.09 %) STAT1 (3.27 %) PTPN1 (1.84 %) IFNGR1 (1.43 %) PTPN2 (1.43 %) PIAS1 (1.23 %) IFNGR2 (1.02 %) PTPN6 (0.82 %) SOCS3 (0.82 %) IFNG (0.61 %)	0.0142944	0.0485203	0.225768	0.0130034	0.298618	0.0347223	0.0391341	0.0441516	0.0435258	0.0565808	0.350318	0.0584312	0.1175	0.0682389	0.105874	0.139739	0.126693	0.507419	0.0827592	0.0447769	0.664319	0.130115	0.0724976	0.0797529	0.386676	0.0584312	0.0694576	0.0827592	0.0851571	0.0694576	0.462976	0.111124	0.46578	0.628968	0.0905296	0.0621211	0.652472	0.141427	0.0952787
Negative Regulation Of (transcription By R Smad:smad4) In TGF Beta Super Family Signaling Pathway ( TGF Beta Super Family Signaling Pathway(canonical) )	159	21	210376	158.498	224	0.150224	2.01897e-13	4.03793e-11	69.6429	SMAD4 (29.45 %) HDAC9 ( 5.32 %) SMAD2 ( 4.70 %) SMAD3 ( 3.89 %) HDAC4 ( 2.86 %) TLE4 ( 2.86 %) HDAC5 ( 2.45 %) HDAC7 ( 2.04 %) SKIL ( 1.84 %) SMAD1 ( 1.64 %) TLE3 ( 1.64 %) HDAC6 ( 1.43 %) SMAD9 ( 1.43 %) TLE1 ( 1.43 %) HDAC2 ( 1.23 %) HDAC1 ( 1.02 %) TLE2 ( 1.02 %) SKI ( 0.82 %) SMAD5 ( 0.82 %) HDAC3 ( 0.61 %) HDAC8 ( 0.41 %)	0.0477076	0.15538	0.58054	0.0434662	0.700099	0.113067	0.126755	0.142141	0.140233	0.179429	0.768754	0.18488	0.345834	0.21335	0.316108	0.400135	0.368682	0.909659	0.254201	0.144045	0.97543	0.377043	0.225491	0.245869	0.809824	0.18488	0.216838	0.254201	0.2608	0.216838	0.878867	0.329648	0.881001	0.965482	0.275435	0.195675	0.972359	0.40412	0.288201
NOTCH1 Intracellular Domain Regulates Transcription	279	47	337216	203.6	272	0.125792	2.22047e-13	4.41667e-11	51.1029	FBXW7 (24.95 %) CREBBP (14.31 %) EP300 ( 9.20 %) NCOR2 ( 6.75 %) NCOR1 ( 6.34 %) NOTCH1 ( 5.93 %) HDAC9 ( 5.32 %) RBPJ ( 3.89 %) CUL1 ( 3.27 %) MAMLD1 ( 3.27 %) HDAC4 ( 2.86 %) TLE4 ( 2.86 %) HDAC5 ( 2.45 %) HIF1A ( 2.45 %) KAT2B ( 2.45 %) TBL1XR1 ( 2.45 %) MAML1 ( 2.25 %) HDAC7 ( 2.04 %) MAML2 ( 2.04 %) SNW1 ( 2.04 %) TBL1X ( 1.64 %) TLE3 ( 1.64 %) CDK8 ( 1.43 %) HDAC6 ( 1.43 %) HEY1 ( 1.43 %) H…	0.0732778	0.231178	0.741415	0.0668442	0.846624	0.170386	0.190233	0.212334	0.209605	0.264985	0.897673	0.272573	0.48351	0.31174	0.446512	0.548692	0.511319	0.976312	0.366572	0.215054	0.99688	0.521357	0.328205	0.355521	0.924528	0.272573	0.316485	0.366572	0.375276	0.316485	0.962604	0.463478	0.963625	0.994703	0.394425	0.287516	0.996252	0.553351	0.410954
E2F Transcription Factor Network	312	77	428582	229.183	297	0.112574	5.69004e-13	1.12564e-10	30.9764	ATM (32.52 %) RB1 (20.65 %) CREBBP (14.31 %) TRRAP (10.84 %) EP300 ( 9.20 %) BRCA1 ( 6.34 %) APAF1 ( 5.11 %) E2F7 ( 4.91 %) RBL2 ( 4.70 %) TOPBP1 ( 4.29 %) CES5A ( 3.89 %) RBL1 ( 3.68 %) SMARCA2 ( 3.48 %) CEBPA ( 3.27 %) ORC1 ( 3.27 %) CES1 ( 2.86 %) RBBP8 ( 2.86 %) KAT2B ( 2.45 %) POLA1 ( 2.45 %) CDC25A ( 2.25 %) CES3 ( 2.25 %) TFE3 ( 2.25 %) CDC6 ( 2.04 %) E2F8 ( 2.04 %) TFDP1 ( 2.04 %) XRCC1 (…	0.0908827	0.280467	0.816108	0.0829738	0.904381	0.208537	0.232171	0.258319	0.2551	0.319859	0.942393	0.328639	0.562734	0.373586	0.52317	0.630691	0.592009	0.990777	0.435428	0.261524	0.999271	0.602474	0.392292	0.423069	0.960649	0.328639	0.378989	0.435428	0.445124	0.378989	0.983664	0.541398	0.984221	0.998586	0.466336	0.34586	0.999083	0.635458	0.48451
PDGF Signaling Pathway	95	113	812792	312.818	377	0.0810501	7.29294e-13	1.43493e-10	28.9125	PIK3CA (41.92 %) BRAF (21.06 %) PDGFRA (10.43 %) PIK3R1 (10.22 %) JAK2 ( 9.82 %) ARHGAP5 ( 9.00 %) ITPR1 ( 8.18 %) NRAS ( 8.18 %) ITPR3 ( 6.95 %) PIK3CG ( 6.95 %) ITPR2 ( 6.13 %) JAK3 ( 5.73 %) VAV3 ( 5.52 %) PIK3C3 ( 5.32 %) RPS6KA2 ( 4.91 %) CHUK ( 4.70 %) PLCG2 ( 4.50 %) SRGAP1 ( 4.50 %) VAV1 ( 4.29 %) JAK1 ( 4.09 %) PDGFRB ( 4.09 %) PLCG1 ( 3.89 %) RASA1 ( 3.89 %) SRGAP3 ( 3.89 %) STAT5B ( 3.…	0.169366	0.473259	0.963044	0.155235	0.989659	0.365857	0.402215	0.441222	0.436489	0.527964	0.996146	0.539759	0.800323	0.597863	0.76363	0.856298	0.825531	0.999891	0.671559	0.445916	0.999999	0.834141	0.620919	0.657411	0.998165	0.539759	0.60459	0.671559	0.682455	0.60459	0.999669	0.780909	0.999691	0.999997	0.705669	0.562472	0.999999	0.859888	0.724875
MAPK1 (ERK2) Activation	80	9	60287	68.1307	119	0.242204	8.813e-13	1.7247e-10	84.0336	JAK2 (9.82 %) PTPN11 (8.18 %) JAK1 (4.09 %) IL6ST (2.04 %) IL6 (1.43 %) IL6R (1.43 %) TYK2 (1.02 %) MAPK1 (0.61 %) MAP2K2 (0.41 %)	0.0139107	0.0472402	0.220394	0.0126541	0.291861	0.0337997	0.0380966	0.0429841	0.0423745	0.0550942	0.342699	0.0568975	0.114513	0.0664569	0.103165	0.136232	0.123489	0.4979	0.0806147	0.0435932	0.654266	0.126831	0.0706087	0.077683	0.378517	0.0568975	0.067645	0.0806147	0.0829534	0.067645	0.453874	0.108289	0.456649	0.618889	0.0881936	0.0604937	0.6424	0.13788	0.0928265
Validated Nuclear Estrogen Receptor Alpha Network	329	65	420480	228.796	296	0.111844	8.92534e-13	1.73734e-10	45.6081	SMAD4 (29.45 %) EP300 ( 9.20 %) DSCAM ( 7.98 %) NCOR2 ( 6.75 %) BRCA1 ( 6.34 %) NCOR1 ( 6.34 %) GREB1 ( 5.32 %) AXIN2 ( 4.91 %) CHUK ( 4.70 %) NCOA2 ( 4.50 %) ESR1 ( 4.29 %) ABCA3 ( 4.09 %) C3 ( 4.09 %) COL18A1 ( 3.89 %) NCOA3 ( 3.48 %) NCOA7 ( 3.48 %) NRIP1 ( 3.48 %) SAFB ( 3.48 %) PGR ( 3.27 %) POU4F2 ( 3.27 %) NCOA1 ( 3.07 %) HDAC4 ( 2.86 %) MED1 ( 2.86 %) APBB1 ( 2.66 %) DDX17 ( 2.66 %) PRDM1…	0.0905979	0.279688	0.815081	0.0827126	0.90364	0.207928	0.231504	0.25759	0.254379	0.318997	0.94185	0.327759	0.561543	0.372622	0.522007	0.629479	0.590804	0.990634	0.434366	0.260788	0.999254	0.601267	0.391296	0.422025	0.960228	0.327759	0.378015	0.434366	0.444049	0.378015	0.983442	0.540221	0.984004	0.998555	0.465233	0.344947	0.999062	0.634247	0.483386
ERK Cascade ( FGF8 Signaling (Mouse) )// ERK Cascade ( FGF8 Signaling (Xenopus) )	42	17	108400	104.011	161	0.189748	1.0703e-12	2.07228e-10	72.0497	BRAF (21.06 %) ERG ( 2.86 %) ETV5 ( 2.86 %) RAF1 ( 2.66 %) ETV6 ( 2.25 %) ARAF ( 2.04 %) ETS1 ( 2.04 %) FLI1 ( 1.84 %) MAP2K1 ( 1.84 %) ELK3 ( 1.43 %) ELK1 ( 1.02 %) ELK4 ( 1.02 %) ETS2 ( 1.02 %) SPI1 ( 1.02 %) MAPK1 ( 0.61 %) MAPK3 ( 0.61 %) MAP2K2 ( 0.41 %)	0.0248733	0.0833346	0.360877	0.0226379	0.462345	0.0599525	0.0674562	0.0759586	0.0749001	0.096877	0.529751	0.0999736	0.196419	0.116311	0.177806	0.23151	0.211005	0.710265	0.140262	0.077016	0.851875	0.216406	0.123365	0.135326	0.57482	0.0999736	0.118332	0.140262	0.14419	0.118332	0.662996	0.186234	0.666068	0.823517	0.152963	0.106135	0.842609	0.234145	0.160686
HIF 1 Alpha Transcription Factor Network	271	67	411122	227.256	294	0.111832	1.24497e-12	2.39771e-10	48.2993	SMAD4 (29.45 %) CREBBP (14.31 %) EP300 ( 9.20 %) ABCB1 ( 4.91 %) NCOA2 ( 4.50 %) CP ( 4.29 %) SMAD3 ( 3.89 %) TF ( 3.89 %) ITGB2 ( 3.27 %) FURIN ( 3.07 %) NCOA1 ( 3.07 %) LDHA ( 2.86 %) HK1 ( 2.66 %) HIF1A ( 2.45 %) SLC2A3 ( 2.45 %) ABCG2 ( 2.25 %) AKT1 ( 2.25 %) CA9 ( 2.25 %) GATA2 ( 2.25 %) ETS1 ( 2.04 %) HDAC7 ( 2.04 %) HNF4A ( 2.04 %) NOS2 ( 1.84 %) PGM1 ( 1.84 %) SERPINE1 ( 1.84 %) TERT ( 1.…	0.0894707	0.276599	0.810965	0.0816791	0.900654	0.205516	0.22886	0.2547	0.251518	0.315576	0.939651	0.324268	0.556803	0.368795	0.517383	0.62465	0.586007	0.990046	0.430146	0.257869	0.99918	0.596456	0.387342	0.417877	0.95852	0.324268	0.374151	0.430146	0.439775	0.374151	0.982532	0.535538	0.983118	0.998427	0.46085	0.341322	0.998972	0.629417	0.478916
TGF Beta Receptor Signaling	177	53	386804	222.373	289	0.113815	1.27806e-12	2.44849e-10	43.9446	SMAD4 (29.45 %) CTNNB1 (18.81 %) SPTBN1 ( 5.11 %) SMAD2 ( 4.70 %) TGFBR2 ( 4.50 %) ZFYVE9 ( 4.09 %) SMAD3 ( 3.89 %) WWP1 ( 3.68 %) ZFYVE16 ( 3.68 %) DAXX ( 3.48 %) TGFBR1 ( 3.48 %) RNF111 ( 3.07 %) SOS1 ( 3.07 %) DAB2 ( 2.86 %) NEDD4L ( 2.66 %) TFAP2B ( 2.66 %) SHC1 ( 2.45 %) TGFBR3 ( 2.45 %) GRB2 ( 2.25 %) PML ( 2.25 %) PPP1R15A ( 2.04 %) TGFBRAP1 ( 2.04 %) XIAP ( 2.04 %) AXIN1 ( 1.84 %) DACT2 (…	0.0859574	0.266911	0.797573	0.0784584	0.890767	0.19797	0.220582	0.245644	0.242555	0.304829	0.932272	0.313297	0.541734	0.356749	0.502718	0.609229	0.570731	0.98797	0.416825	0.248719	0.998902	0.581125	0.374883	0.40479	0.952725	0.313297	0.361983	0.416825	0.426278	0.361983	0.979372	0.52067	0.980035	0.997949	0.446989	0.329925	0.998637	0.613989	0.464771
PDGF Pathway	258	16	91637	92.1073	145	0.197074	7.23653e-12	1.37911e-09	68.9655	PIK3R1 (10.22 %) TIAM1 ( 6.95 %) CHUK ( 4.70 %) VAV1 ( 4.29 %) VAV2 ( 3.89 %) STAT1 ( 3.27 %) WASL ( 3.27 %) PAK1 ( 2.66 %) RAF1 ( 2.66 %) RHOA ( 2.45 %) STAT3 ( 2.04 %) SRC ( 0.82 %) CDC42 ( 0.61 %) ARFIP2 ( 0.41 %) RAC1 ( 0.41 %)	0.0209122	0.0704066	0.313128	0.0190293	0.405873	0.0505516	0.0569147	0.0641346	0.0632351	0.0819434	0.469034	0.0845854	0.167632	0.0985478	0.151485	0.19824	0.180328	0.646335	0.119093	0.0650332	0.798574	0.185039	0.104589	0.114852	0.512074	0.0845854	0.100278	0.119093	0.122472	0.100278	0.598521	0.15879	0.601595	0.766683	0.130026	0.0898464	0.788053	0.200547	0.136686
Nonhomologous End Joining (NHEJ)	323	69	350615	197.653	261	0.120736	7.69317e-12	1.4585e-09	45.2107	ATM (32.52 %) PRKDC (14.11 %) RIF1 ( 9.20 %) HERC2 ( 9.00 %) BRCA1 ( 6.34 %) RAD50 ( 4.70 %) PAXIP1 ( 4.09 %) TP53BP1 ( 4.09 %) MDC1 ( 3.48 %) LIG4 ( 3.07 %) BRE ( 2.86 %) XRCC5 ( 2.66 %) BARD1 ( 2.25 %) NBN ( 2.25 %) POLM ( 2.25 %) RNF168 ( 2.04 %) DCLRE1C ( 1.84 %) UIMC1 ( 1.84 %) FAM175A ( 1.64 %) RNF8 ( 1.43 %) XRCC4 ( 1.43 %) XRCC6 ( 1.43 %) KAT5 ( 1.23 %) HIST1H2BA ( 1.02 %) HIST1H4L ( 1.02…	0.0695238	0.220366	0.722152	0.0634084	0.830562	0.162113	0.181105	0.202284	0.199667	0.252866	0.8845	0.260171	0.46506	0.297945	0.428844	0.529209	0.492373	0.971102	0.35102	0.204892	0.995761	0.502251	0.313858	0.340304	0.913423	0.260171	0.302529	0.35102	0.359467	0.302529	0.955472	0.445435	0.956623	0.993003	0.378073	0.274569	0.994957	0.533813	0.394158
EGFR1	30	475	3242934	454.283	484	0.0275187	8.73522e-12	1.64747e-09	6.40496	TP53 (61.76 %) KRAS (44.38 %) PIK3CA (41.92 %) PTEN (38.24 %) KIT (22.90 %) BRAF (21.06 %) CDH1 (17.59 %) EGFR (16.56 %) PIK3R1 (10.22 %) MET (10.02 %) JAK2 ( 9.82 %) HUWE1 ( 9.41 %) ARHGAP5 ( 9.00 %) AHNAK ( 8.59 %) EPHB1 ( 8.59 %) MAP3K4 ( 8.18 %) PTPN11 ( 8.18 %) CBL ( 7.98 %) MTOR ( 7.98 %) ERBB2 ( 7.36 %) PTPRK ( 7.16 %) STK11 ( 7.16 %) PIK3CG ( 6.95 %) MCF2 ( 6.75 %) FLNB ( 6.54 %) TNS1 ( 6…	0.51881	0.9201	0.999998	0.485723	1	0.833952	0.868432	0.899161	0.895751	0.948141	1	0.953064	0.998254	0.972428	0.996606	0.999523	0.998975	1	0.987586	0.902458	1	0.99916	0.978153	0.985341	1	0.953064	0.974202	0.987586	0.989132	0.974202	1	0.997484	1	1	0.991943	0.961553	1	0.999568	0.993825
IL 6 Type Cytokine Receptor Ligand Interactions	226	20	82690	84.8227	136	0.205027	1.12731e-11	2.11515e-09	76.4706	JAK2 (9.82 %) LIFR (6.34 %) OSMR (4.50 %) JAK1 (4.09 %) IL12RB2 (3.89 %) IL6ST (2.04 %) CNTFR (1.84 %) IL11 (1.23 %) IL27RA (1.23 %) TYK2 (1.02 %) OSM (0.82 %) CNTF (0.61 %) CRLF1 (0.61 %) EBI3 (0.61 %) IL11RA (0.61 %) CLCF1 (0.41 %) IL12A (0.41 %) IL27 (0.41 %) LIF (0.20 %)	0.0186511	0.0629697	0.284384	0.0169701	0.371133	0.0451608	0.0508637	0.0573396	0.0565325	0.0733365	0.43105	0.0757126	0.150795	0.0882822	0.136135	0.17867	0.162344	0.603849	0.106817	0.0581459	0.76008	0.166634	0.0937275	0.102987	0.472323	0.0757126	0.0898413	0.106817	0.109869	0.0898413	0.556472	0.142763	0.559499	0.726516	0.116699	0.0804464	0.748947	0.180776	0.122725
ATM Pathway	305	34	268496	179.503	241	0.127945	1.40374e-11	2.62031e-09	47.3029	ATM (32.52 %) FANCD2 ( 7.77 %) ABL1 ( 6.34 %) BRCA1 ( 6.34 %) CHEK2 ( 5.73 %) BLM ( 4.91 %) RAD50 ( 4.70 %) SMC1A ( 4.29 %) TP53BP1 ( 4.09 %) TOP3A ( 3.68 %) MDC1 ( 3.48 %) RBBP8 ( 2.86 %) SMC3 ( 2.45 %) CDC25A ( 2.25 %) NBN ( 2.25 %) DCLRE1C ( 1.84 %) MDM2 ( 1.84 %) UIMC1 ( 1.84 %) FAM175A ( 1.64 %) RAD17 ( 1.64 %) RNF8 ( 1.43 %) XRCC4 ( 1.43 %) CDC25C ( 1.23 %) CTBP1 ( 1.23 %) KAT5 ( 1.23 %) RF…	0.0588016	0.188889	0.659401	0.053602	0.775302	0.138214	0.154672	0.173097	0.170816	0.217421	0.837208	0.223861	0.409112	0.257325	0.375646	0.4693	0.434589	0.949232	0.304836	0.175372	0.989895	0.443858	0.271509	0.295196	0.872251	0.223861	0.261406	0.304836	0.312454	0.261406	0.926969	0.390934	0.928561	0.984598	0.32929	0.236583	0.988306	0.473668	0.343908
Degradation Of The Extracellular Matrix	244	72	425700	230.285	293	0.104602	2.38444e-11	4.42824e-09	45.7338	CDH1 (17.59 %) LAMA3 ( 7.36 %) ADAMTS16 ( 6.95 %) ADAMTS18 ( 6.95 %) ACAN ( 6.13 %) TLL1 ( 5.73 %) ADAMTS9 ( 5.52 %) A2M ( 5.32 %) PLG ( 5.32 %) LAMA5 ( 5.11 %) NID1 ( 5.11 %) ADAMTS5 ( 4.91 %) HSPG2 ( 4.70 %) LAMC1 ( 4.70 %) LAMB1 ( 3.89 %) ADAMTS4 ( 3.68 %) BMP1 ( 3.68 %) ADAMTS1 ( 3.48 %) MMP9 ( 3.48 %) CAPN6 ( 3.07 %) MMP2 ( 3.07 %) TLL2 ( 3.07 %) ADAM15 ( 2.86 %) LAMC2 ( 2.86 %) CAPN5 ( 2.66…	0.0916969	0.282691	0.819013	0.0837204	0.906468	0.210276	0.234076	0.260401	0.25716	0.32232	0.943918	0.33115	0.566122	0.376335	0.526479	0.634134	0.595434	0.991175	0.438455	0.263627	0.999319	0.605907	0.395131	0.426045	0.961828	0.33115	0.381764	0.438455	0.448189	0.381764	0.984284	0.544748	0.984825	0.998671	0.469478	0.348466	0.999141	0.638901	0.487712
Regulation Of Gene Expression By Hypoxia Inducible Factor	291	10	74892	80.1084	129	0.206911	3.93768e-11	7.2757e-09	75.1938	CREBBP (14.31 %) EP300 ( 9.20 %) HIF3A ( 3.27 %) HIF1A ( 2.45 %) CA9 ( 2.25 %) EPAS1 ( 1.64 %) ARNT ( 1.43 %) VEGFA ( 1.02 %) CITED2 ( 0.61 %) EPO ( 0.20 %)	0.0172514	0.0583446	0.266025	0.0156955	0.348658	0.0418145	0.0471053	0.0531162	0.0523669	0.067978	0.406233	0.070187	0.140222	0.0818806	0.126512	0.16634	0.151034	0.575082	0.0991457	0.0538649	0.7327	0.155054	0.0869501	0.0955758	0.446158	0.070187	0.0833319	0.0991457	0.101992	0.0833319	0.528317	0.132708	0.531292	0.698312	0.108362	0.0745895	0.721256	0.168316	0.113986
Meiotic Synapsis	321	76	311144	193.855	254	0.117357	6.53603e-11	1.20157e-08	47.2441	SYNE1 (28.83 %) ATR ( 9.41 %) SYNE2 ( 9.20 %) BRCA1 ( 6.34 %) SYCP2 ( 5.73 %) DIDO1 ( 5.32 %) STAG1 ( 5.32 %) SYCP1 ( 4.91 %) SMC1B ( 4.50 %) SMC1A ( 4.29 %) RAD21 ( 3.48 %) STAG3 ( 3.07 %) STAG2 ( 2.86 %) SMC3 ( 2.45 %) HSPA2 ( 1.84 %) LMNB1 ( 1.84 %) TERF1 ( 1.43 %) HIST2H2AC ( 1.23 %) POT1 ( 1.23 %) SUN2 ( 1.23 %) FKBP6 ( 1.02 %) HIST1H2BA ( 1.02 %) HIST1H4L ( 1.02 %) SUN1 ( 1.02 %) SYCE1 ( 1.…	0.0671893	0.213588	0.709499	0.0612725	0.819772	0.156943	0.175396	0.19599	0.193444	0.245254	0.875497	0.252378	0.453295	0.289255	0.417611	0.516713	0.480262	0.967312	0.341189	0.198528	0.994874	0.490028	0.304812	0.330692	0.905735	0.252378	0.293735	0.341189	0.349468	0.293735	0.950383	0.433948	0.951622	0.991685	0.367717	0.266426	0.993939	0.521275	0.383508
Regulation Of RAC1 Activity	260	39	337789	207.012	267	0.110516	1.07244e-10	1.96164e-08	52.4345	DOCK2 (8.18 %) PREX2 (8.18 %) KALRN (7.57 %) TRIO (7.16 %) TIAM1 (6.95 %) MCF2 (6.75 %) DOCK1 (5.52 %) VAV3 (5.52 %) ARHGAP32 (5.32 %) PREX1 (5.32 %) ELMO1 (5.11 %) RASGRF2 (4.70 %) TIAM2 (4.70 %) ARHGEF7 (4.50 %) RASGRF1 (4.50 %) VAV1 (4.29 %) VAV2 (3.89 %) DOCK6 (3.68 %) NGEF (3.48 %) ARHGEF25 (3.27 %) ABR (3.07 %) SOS1 (3.07 %) ARHGEF6 (2.86 %) SPATA13 (2.66 %) BCR (2.25 %) ARHGAP9 (2.04 %) CH…	0.0754877	0.237493	0.752158	0.0688674	0.855385	0.175233	0.195576	0.21821	0.215416	0.27205	0.904736	0.2798	0.494105	0.31976	0.456689	0.559817	0.522174	0.978937	0.375581	0.220995	0.997396	0.532294	0.336537	0.364342	0.930404	0.2798	0.324596	0.375581	0.384428	0.324596	0.966267	0.473857	0.967217	0.995506	0.40388	0.295053	0.996855	0.564504	0.420654
IRF3 Mediated Induction Of Type I IFN	198	13	71308	70.9647	117	0.217143	1.09389e-10	1.99088e-08	69.2308	PRKDC (14.11 %) NLRP4 ( 6.34 %) IFI16 ( 2.66 %) XRCC5 ( 2.66 %) ZBP1 ( 2.66 %) DTX4 ( 1.84 %) TBK1 ( 1.84 %) DDX41 ( 1.43 %) XRCC6 ( 1.43 %) IRF3 ( 0.82 %) TMEM173 ( 0.41 %) TREX1 ( 0.41 %)	0.0146738	0.049785	0.231048	0.0133488	0.30524	0.0356341	0.0401594	0.0453051	0.0446634	0.0580491	0.357767	0.059946	0.120445	0.0699984	0.108545	0.143195	0.129851	0.516659	0.0848757	0.0459464	0.673977	0.133352	0.0743624	0.081796	0.394642	0.059946	0.0712473	0.0848757	0.087332	0.0712473	0.47183	0.11392	0.474662	0.638676	0.0928346	0.0637283	0.662157	0.14492	0.097698
Stabilization And Expansion Of The E Cadherin Adherens Junction	263	43	335329	200.328	260	0.113232	1.11154e-10	2.01294e-08	46.5385	CTNNB1 (18.81 %) CDH1 (17.59 %) EGFR (16.56 %) MET (10.02 %) ROCK1 ( 5.52 %) CTNNA1 ( 4.91 %) IGF1R ( 4.29 %) CTNND1 ( 3.89 %) EXOC4 ( 3.89 %) EXOC1 ( 3.27 %) NCKAP1 ( 3.07 %) PLEKHA7 ( 3.07 %) LIMA1 ( 2.86 %) ACTN1 ( 2.66 %) HGF ( 2.66 %) MYO6 ( 2.66 %) PIP5K1C ( 2.66 %) RHOA ( 2.45 %) CYFIP2 ( 2.04 %) EPHA2 ( 2.04 %) KIFC3 ( 2.04 %) MGAT3 ( 2.04 %) CAMSAP3 ( 1.84 %) VCL ( 1.64 %) ENAH ( 1.43 %)…	0.071197	0.225198	0.730899	0.0649397	0.837911	0.165806	0.185182	0.206774	0.204107	0.258286	0.890563	0.265719	0.473354	0.304121	0.436779	0.537985	0.500897	0.97355	0.35799	0.209433	0.996302	0.51085	0.320283	0.347123	0.918556	0.265719	0.308777	0.35799	0.366554	0.308777	0.958801	0.453542	0.959893	0.993818	0.385407	0.280362	0.995581	0.542615	0.401694
PDGF Receptor Signaling Network	283	6	34640	43.8186	82	0.272155	5.19003e-10	9.35234e-08	86.5854	PDGFRA (10.43 %) PDGFRB ( 4.09 %) PDGFD ( 2.25 %) PDGFC ( 2.04 %) PDGFA ( 0.61 %) PDGFB ( 0.41 %)	0.00801667	0.0274225	0.133291	0.00729055	0.179874	0.0195627	0.0220704	0.0249285	0.0245717	0.0320373	0.21424	0.0330992	0.067494	0.0387427	0.0606456	0.0807052	0.0729368	0.326901	0.0471463	0.0252852	0.45679	0.0749696	0.0412014	0.0454016	0.239135	0.0330992	0.0394458	0.0471463	0.0485397	0.0394458	0.293597	0.0637336	0.295662	0.425515	0.0516675	0.0352194	0.446154	0.0817136	0.0544391
ATF 2 Transcription Factor Network	304	59	352678	204.768	262	0.10704	6.41237e-10	1.1498e-07	46.9466	NF1 (21.06 %) RB1 (20.65 %) PDGFRA (10.43 %) EP300 ( 9.20 %) BRCA1 ( 6.34 %) ESR1 ( 4.29 %) PPARGC1A ( 4.29 %) COL24A1 ( 4.09 %) MMP2 ( 3.07 %) MAPK8 ( 2.86 %) MAPK9 ( 2.66 %) SELE ( 2.25 %) NOS2 ( 1.84 %) CUL3 ( 1.64 %) MAPK14 ( 1.64 %) PRKCA ( 1.64 %) ATF2 ( 1.43 %) DUSP1 ( 1.43 %) IL6 ( 1.43 %) TGFB2 ( 1.43 %) CSRP2 ( 1.23 %) CXCL8 ( 1.23 %) DUSP10 ( 1.23 %) H2AFY ( 1.23 %) KAT5 ( 1.23 %) PLAU…	0.0740296	0.233331	0.745118	0.0675325	0.84966	0.172037	0.192053	0.214337	0.211585	0.267395	0.900131	0.275038	0.487136	0.314477	0.449993	0.552505	0.515037	0.977239	0.369649	0.217079	0.997066	0.525103	0.33105	0.358533	0.926579	0.275038	0.319253	0.369649	0.378402	0.319253	0.963892	0.467029	0.964888	0.994991	0.397656	0.290087	0.996469	0.557174	0.414269
Regulation Of Nuclear SMAD2/3 Signaling	235	82	546880	261.323	319	0.0866123	6.77732e-10	1.20929e-07	40.1254	SMAD4 (29.45 %) CREBBP (14.31 %) EP300 ( 9.20 %) RUNX1 ( 8.18 %) NCOR1 ( 6.34 %) AR ( 5.32 %) COL1A2 ( 5.32 %) LAMC1 ( 4.70 %) SMAD2 ( 4.70 %) NCOA2 ( 4.50 %) ESR1 ( 4.29 %) SIN3A ( 4.09 %) SMAD3 ( 3.89 %) RBL1 ( 3.68 %) TGIF1 ( 3.48 %) GATA3 ( 3.27 %) MEF2C ( 3.27 %) RBBP7 ( 3.27 %) NCOA1 ( 3.07 %) FOXO4 ( 2.45 %) KAT2B ( 2.45 %) AKT1 ( 2.25 %) SIN3B ( 2.25 %) SP3 ( 2.25 %) TFE3 ( 2.25 %) HNF4A …	0.116737	0.348723	0.889878	0.106713	0.953026	0.262646	0.291202	0.322485	0.318651	0.394784	0.975725	0.404943	0.65962	0.45631	0.618957	0.726853	0.689002	0.997768	0.525167	0.326297	0.999918	0.699354	0.477365	0.51158	0.985225	0.404943	0.46241	0.525167	0.535764	0.46241	0.9953	0.637824	0.995508	0.999806	0.55875	0.424751	0.99989	0.731437	0.578224
Signaling By EGFR	118	7	64107	71.3745	115	0.207155	8.61602e-10	1.52987e-07	83.4783	EGFR (16.56 %) ADAM12 ( 3.68 %) LRIG1 ( 2.66 %) ADAM17 ( 2.45 %) ADAM10 ( 1.64 %) EGF ( 1.23 %) SRC ( 0.82 %)	0.0147856	0.0501572	0.232596	0.0134505	0.307178	0.0359024	0.0404611	0.0456446	0.0449982	0.0584811	0.359945	0.0603917	0.121311	0.0705159	0.109331	0.14421	0.130779	0.519347	0.0854981	0.0462905	0.676768	0.134303	0.0749109	0.0823968	0.396968	0.0603917	0.0717737	0.0854981	0.0879715	0.0717737	0.47441	0.114742	0.477249	0.641487	0.0935123	0.0642011	0.664958	0.145947	0.0984092
EPH Ephrin Mediated Repulsion Of Cells	247	48	291890	190.217	246	0.111687	1.08497e-09	1.91713e-07	47.561	EPHA3 (12.88 %) EPHA7 ( 8.59 %) EPHB1 ( 8.59 %) EPHA5 ( 7.57 %) TIAM1 ( 6.95 %) VAV3 ( 5.52 %) EPHA4 ( 5.11 %) EPHA6 ( 4.91 %) CLTCL1 ( 4.09 %) VAV2 ( 3.89 %) EPHA8 ( 3.68 %) CLTC ( 3.48 %) FYN ( 3.48 %) MMP9 ( 3.48 %) DNM1 ( 3.07 %) EPHB2 ( 3.07 %) MMP2 ( 3.07 %) EPHB6 ( 2.86 %) AP2A2 ( 2.66 %) EPHA10 ( 2.66 %) EPHB4 ( 2.66 %) EPHB3 ( 2.45 %) AP2B1 ( 2.25 %) EFNB3 ( 2.25 %) EPHA1 ( 2.04 %) EPHA2…	0.0649987	0.207189	0.697132	0.0592685	0.80905	0.152075	0.170015	0.190053	0.187575	0.238057	0.866435	0.245009	0.442048	0.281024	0.406895	0.504715	0.468664	0.963315	0.331851	0.192524	0.993876	0.478314	0.296235	0.321567	0.89792	0.245009	0.285403	0.331851	0.339966	0.285403	0.945094	0.42298	0.94642	0.990227	0.357865	0.258721	0.9928	0.509233	0.373368
CREB Phosphorylation Through The Activation Of Ras	23	13	100216	98.5592	146	0.170656	1.13186e-09	1.99033e-07	65.7534	BRAF (21.06 %) RPS6KA2 ( 4.91 %) RPS6KA6 ( 3.68 %) RPS6KA3 ( 3.27 %) RAF1 ( 2.66 %) CAMK2G ( 2.25 %) RPS6KA1 ( 1.84 %) CAMK2D ( 1.64 %) CAMK2A ( 0.82 %) CAMK2B ( 0.82 %) CREB1 ( 0.61 %) MAPK1 ( 0.61 %) RRAS ( 0.41 %)	0.0230172	0.0772929	0.338907	0.0209468	0.436557	0.0555544	0.0625262	0.070431	0.0694465	0.0899025	0.502186	0.0927878	0.183042	0.108023	0.165563	0.216079	0.196761	0.681859	0.130396	0.0714144	0.828903	0.201846	0.114607	0.125782	0.546461	0.0927878	0.109909	0.130396	0.13407	0.109909	0.634154	0.173474	0.637239	0.798824	0.14228	0.0985311	0.81903	0.218565	0.149512
Regulation Of IFNA Signaling	203	26	73405	77.9678	122	0.194444	1.52214e-09	2.66374e-07	72.9508	PTPN11 (8.18 %) JAK1 (4.09 %) STAT1 (3.27 %) STAT2 (2.25 %) IFNA2 (2.04 %) PTPN1 (1.84 %) IFNA1 (1.64 %) IFNAR1 (1.64 %) IFNA10 (1.02 %) IFNA5 (1.02 %) IFNAR2 (1.02 %) IFNB1 (1.02 %) TYK2 (1.02 %) IFNA14 (0.82 %) IFNA16 (0.82 %) IFNA4 (0.82 %) PTPN6 (0.82 %) SOCS3 (0.82 %) IFNA6 (0.61 %) IFNA8 (0.61 %) USP18 (0.61 %) IFNA13 (0.41 %) IFNA17 (0.41 %) IFNA21 (0.41 %) IFNA7 (0.41 %)	0.0166319	0.0562924	0.257758	0.0151314	0.338467	0.0403313	0.0454389	0.0512429	0.0505193	0.065599	0.394918	0.0677335	0.135505	0.079036	0.122223	0.16083	0.145986	0.561707	0.0957332	0.0519659	0.719619	0.149883	0.0839376	0.0922797	0.43418	0.0677335	0.0804391	0.0957332	0.0984865	0.0804391	0.515306	0.128225	0.518253	0.684932	0.104651	0.0719881	0.708059	0.162747	0.110095
ATR Signaling Pathway	306	39	230819	164.844	216	0.117381	7.84609e-09	1.3665e-06	51.3889	BRCA2 (12.68 %) ATR ( 9.41 %) FANCD2 ( 7.77 %) CLSPN ( 6.95 %) CEP164 ( 6.34 %) TOPBP1 ( 4.29 %) SMARCAL1 ( 3.89 %) FBXW11 ( 2.86 %) PLK1 ( 2.86 %) PPP2R1A ( 2.86 %) MCM7 ( 2.66 %) TIMELESS ( 2.66 %) CHEK1 ( 2.45 %) CDC25A ( 2.25 %) NBN ( 2.25 %) PPP2R2B ( 2.25 %) CDC6 ( 2.04 %) RPA1 ( 2.04 %) BTRC ( 1.84 %) MDM2 ( 1.84 %) HUS1 ( 1.64 %) RAD17 ( 1.64 %) RFC4 ( 1.43 %) RFC5 ( 1.43 %) CDC25C ( 1.23…	0.0509157	0.16517	0.604957	0.0463962	0.724024	0.120383	0.134888	0.151172	0.149154	0.190555	0.790986	0.196302	0.364722	0.226274	0.333813	0.420929	0.388413	0.923474	0.269149	0.153186	0.980977	0.397067	0.239033	0.260417	0.830413	0.196302	0.229941	0.269149	0.276061	0.229941	0.895292	0.347904	0.897263	0.97264	0.291373	0.207676	0.978424	0.425041	0.304712
VEGFR2 Mediated Vascular Permeability	300	29	207985	153.926	204	0.122318	9.3428e-09	1.61942e-06	58.3333	CTNNB1 (18.81 %) MTOR ( 7.98 %) VAV3 ( 5.52 %) CTNNA1 ( 4.91 %) RICTOR ( 4.50 %) NOS3 ( 4.29 %) VAV1 ( 4.29 %) CTNND1 ( 3.89 %) VAV2 ( 3.89 %) PAK3 ( 3.68 %) PAK1 ( 2.66 %) AKT1 ( 2.25 %) PAK2 ( 2.25 %) AKT3 ( 1.84 %) HSP90AA1 ( 1.84 %) JUP ( 1.84 %) AKT2 ( 1.64 %) CDH5 ( 1.64 %) MAPKAP1 ( 1.23 %) PDPK1 ( 0.82 %) TRIB3 ( 0.82 %) PRR5 ( 0.61 %) THEM4 ( 0.61 %) CAV1 ( 0.41 %) MLST8 ( 0.41 %) RAC1 (…	0.045471	0.148508	0.562681	0.0414241	0.682255	0.107945	0.121057	0.135806	0.133976	0.171604	0.751919	0.176844	0.332374	0.204238	0.303523	0.385241	0.354592	0.89861	0.243629	0.137632	0.970647	0.362732	0.215934	0.235587	0.794056	0.176844	0.207598	0.243629	0.250002	0.207598	0.865953	0.316657	0.868202	0.95943	0.264145	0.187226	0.967165	0.38913	0.276493
Regulation Of Telomerase	217	70	469454	241.812	295	0.0863443	1.28191e-08	2.21145e-06	39.661	ATM (32.52 %) EGFR (16.56 %) MTOR ( 7.98 %) ABL1 ( 6.34 %) WT1 ( 6.13 %) BLM ( 4.91 %) RAD50 ( 4.70 %) ESR1 ( 4.29 %) SIN3A ( 4.09 %) UBE3A ( 4.09 %) SMAD3 ( 3.89 %) ZNFX1 ( 3.89 %) WRN ( 3.48 %) RBBP7 ( 3.27 %) SMG6 ( 3.07 %) XRCC5 ( 2.66 %) NCL ( 2.45 %) AKT1 ( 2.25 %) NBN ( 2.25 %) SIN3B ( 2.25 %) SMG5 ( 2.25 %) SP3 ( 2.25 %) NFKB1 ( 2.04 %) NR2F2 ( 2.04 %) TNKS ( 2.04 %) HSP90AA1 ( 1.84 %) HU…	0.100508	0.306444	0.847803	0.0918047	0.926437	0.228947	0.254501	0.282671	0.279209	0.348525	0.95812	0.357867	0.601331	0.405478	0.561032	0.669584	0.63089	0.994536	0.470357	0.286116	0.999675	0.641401	0.425181	0.457452	0.972585	0.357867	0.411175	0.470357	0.48046	0.411175	0.989684	0.579648	0.990074	0.999321	0.502492	0.376153	0.99958	0.674322	0.521291
FOXA1 Transcription Factor Network	313	45	276002	183.268	234	0.106129	2.05511e-08	3.52859e-06	54.7009	CREBBP (14.31 %) APOB (12.88 %) EP300 ( 9.20 %) DSCAM ( 7.98 %) BRCA1 ( 6.34 %) AR ( 5.32 %) ESR1 ( 4.29 %) COL18A1 ( 3.89 %) NCOA3 ( 3.48 %) NRIP1 ( 3.48 %) PRDM15 ( 2.66 %) VTN ( 2.66 %) NFIB ( 2.45 %) NFIA ( 2.04 %) NR2F2 ( 2.04 %) PISD ( 1.64 %) SERPINA1 ( 1.64 %) CDKN1B ( 1.43 %) CYP2C18 ( 1.43 %) NFIC ( 1.43 %) SP1 ( 1.43 %) FOXA2 ( 1.23 %) SFTPD ( 1.23 %) FOS ( 1.02 %) GCG ( 1.02 %) NDUFV3…	0.0609369	0.195228	0.672877	0.0555542	0.78753	0.143005	0.159979	0.178967	0.176617	0.224578	0.847916	0.231198	0.42065	0.26556	0.386572	0.481754	0.446545	0.954598	0.314246	0.18131	0.991493	0.455954	0.280107	0.304376	0.881733	0.231198	0.269746	0.314246	0.32204	0.269746	0.933792	0.402148	0.935289	0.986828	0.339255	0.244268	0.990102	0.486178	0.35419
FAS Pathway And Stress Induction Of HSP Regulation	338	5	46636	55.7952	92	0.217191	3.15998e-08	5.40016e-06	89.1304	PRKDC (14.11 %) DAXX ( 3.48 %) MAP3K7 ( 1.64 %) ARHGDIB ( 1.23 %) JUN ( 0.41 %)	0.0107779	0.0367427	0.175182	0.00980289	0.234303	0.0262478	0.0295994	0.0334158	0.0329395	0.0428911	0.277183	0.0443043	0.0897895	0.0518066	0.0807785	0.107108	0.0969347	0.41313	0.0629496	0.0338917	0.56027	0.0995997	0.0550702	0.060639	0.307844	0.0443043	0.0527402	0.0629496	0.064794	0.0527402	0.373705	0.0848445	0.376168	0.52585	0.0689307	0.0471246	0.548639	0.108426	0.0725924
Constitutive Signaling By NOTCH1 HD+PEST Domain Mutants// Constitutive Signaling By NOTCH1 PEST Domain Mutants	269	57	395793	222.16	272	0.0879035	8.01052e-08	1.36254e-05	49.6324	FBXW7 (24.95 %) CREBBP (14.31 %) EP300 ( 9.20 %) NCOR2 ( 6.75 %) NCOR1 ( 6.34 %) NOTCH1 ( 5.93 %) HDAC9 ( 5.32 %) RBPJ ( 3.89 %) CUL1 ( 3.27 %) MAMLD1 ( 3.27 %) JAG1 ( 3.07 %) HDAC4 ( 2.86 %) ADAM17 ( 2.45 %) HDAC5 ( 2.45 %) KAT2B ( 2.45 %) MIB1 ( 2.45 %) TBL1XR1 ( 2.45 %) JAG2 ( 2.25 %) MAML1 ( 2.25 %) HDAC7 ( 2.04 %) MAML2 ( 2.04 %) SNW1 ( 2.04 %) DLL1 ( 1.84 %) ADAM10 ( 1.64 %) MIB2 ( 1.64 %) …	0.0858059	0.266491	0.796977	0.0783196	0.89032	0.197644	0.220224	0.245251	0.242167	0.304363	0.931935	0.312821	0.541074	0.356225	0.502077	0.608552	0.570061	0.987872	0.416245	0.248323	0.998888	0.580453	0.374342	0.404221	0.952458	0.312821	0.361454	0.416245	0.42569	0.361454	0.979224	0.52002	0.979891	0.997925	0.446385	0.32943	0.99862	0.613311	0.464154
TNFalpha	344	274	1805329	407.986	444	0.0367381	1.30026e-07	2.20137e-05	14.1892	TP53 (61.76 %) FBXW7 (24.95 %) RB1 (20.65 %) EGFR (16.56 %) CREBBP (14.31 %) PIK3R1 (10.22 %) EP300 ( 9.20 %) PTPN11 ( 8.18 %) MTOR ( 7.98 %) FANCD2 ( 7.77 %) PEG3 ( 7.57 %) ERBB2 ( 7.36 %) TNFAIP3 ( 7.36 %) MAP2K4 ( 6.95 %) SMARCA4 ( 6.95 %) NLRP4 ( 6.34 %) FLNA ( 6.13 %) MYLK ( 6.13 %) ERBB3 ( 5.93 %) IQGAP2 ( 5.32 %) APAF1 ( 5.11 %) SMARCB1 ( 4.91 %) CHUK ( 4.70 %) SMAD2 ( 4.70 %) IRS1 ( 4.50 …	0.337838	0.75928	0.999342	0.312552	0.999961	0.636463	0.681153	0.725541	0.720349	0.811323	0.999996	0.821637	0.972098	0.867841	0.959412	0.986564	0.979326	1	0.915708	0.730636	1	0.981524	0.884088	0.907429	0.999999	0.821637	0.872702	0.915708	0.921795	0.872702	1	0.965711	1	1	0.933932	0.840605	1	0.987299	0.94313
HIF 2 Alpha Transcription Factor Network	272	34	214648	157.698	202	0.107527	3.54105e-07	5.96733e-05	50.495	VHL (15.95 %) CREBBP (14.31 %) EP300 ( 9.20 %) FLT1 ( 6.95 %) KDR ( 6.54 %) EIF3E ( 2.45 %) ABCG2 ( 2.25 %) ETS1 ( 2.04 %) SERPINE1 ( 1.84 %) SIRT1 ( 1.84 %) EPAS1 ( 1.64 %) SLC11A2 ( 1.64 %) ARNT ( 1.43 %) EGLN2 ( 1.43 %) SLC2A1 ( 1.43 %) SP1 ( 1.43 %) MMP14 ( 1.23 %) ADORA2A ( 1.02 %) APEX1 ( 1.02 %) EGLN1 ( 1.02 %) ELK1 ( 1.02 %) VEGFA ( 1.02 %) HIF1AN ( 0.82 %) CITED2 ( 0.61 %) EGLN3 ( 0.61 %…	0.0473114	0.154166	0.577428	0.0431045	0.69701	0.112161	0.125748	0.141021	0.139126	0.178047	0.765855	0.183461	0.343468	0.211742	0.313893	0.397521	0.366207	0.907792	0.252337	0.142911	0.974643	0.374529	0.223805	0.244056	0.807119	0.183461	0.215208	0.252337	0.258897	0.215208	0.876671	0.327363	0.878826	0.964479	0.273446	0.194184	0.971502	0.40149	0.286139
FGFR2b Ligand Binding And Activation	51	10	38028	43.3904	73	0.225929	7.23798e-07	0.000121411	89.0411	FGFR2 (10.84 %) FGFBP1 ( 1.43 %) FGF10 ( 1.02 %) FGF2 ( 1.02 %) FGF3 ( 1.02 %) FGF1 ( 0.61 %) FGF7 ( 0.61 %) FGF22 ( 0.20 %)	0.00792285	0.0271047	0.131833	0.00720519	0.177961	0.0193351	0.021814	0.0246393	0.0242866	0.0316669	0.212011	0.0327167	0.0667281	0.0382963	0.0599549	0.0797958	0.0721115	0.323763	0.0466054	0.0249919	0.452881	0.0741223	0.0407273	0.0448803	0.236688	0.0327167	0.0389915	0.0466054	0.0479833	0.0389915	0.290706	0.0630089	0.292755	0.421762	0.0510762	0.0348129	0.442295	0.0807934	0.053817
AKT(PKB) Bad Signaling ( EPO Signaling Pathway(JAK2 STAT1 STAT3 STAT5) )// AKT(PKB) Bad Signaling ( IL 7 Signaling(JAK1 JAK3 STAT5) )// Positive Regulation Of (Transcription Of SOCS By STAT Dimer) In JAK STAT Pathway ( JAK STAT Pathway And Regulation Pathway Diagram )// VEGF Signaling Pathway ( VEGF Signaling Pathway )	6	190	1270222	367.353	405	0.0423716	2.50051e-06	0.000417516	17.037	PIK3CA (41.92 %) KIT (22.90 %) BRAF (21.06 %) EGFR (16.56 %) FGFR2 (10.84 %) PDGFRA (10.43 %) PIK3R1 (10.22 %) MET (10.02 %) JAK2 ( 9.82 %) BMPR2 ( 8.59 %) ALK ( 7.98 %) MTOR ( 7.98 %) FLT1 ( 6.95 %) MAP2K4 ( 6.95 %) KDR ( 6.54 %) ACVR2A ( 5.73 %) JAK3 ( 5.73 %) ACVR1B ( 5.52 %) PRKCB ( 5.11 %) CDC7 ( 4.91 %) ITK ( 4.91 %) RPS6KA2 ( 4.91 %) CHUK ( 4.70 %) FGFR3 ( 4.70 %) PRKCG ( 4.70 %) PLCG2 ( 4…	0.24875	0.627701	0.993801	0.22896	0.999129	0.504427	0.547535	0.59223	0.586894	0.685593	0.99981	0.69762	0.91652	0.754407	0.89173	0.949721	0.932197	0.999999	0.820234	0.597497	1	0.937285	0.775771	0.80816	0.999939	0.69762	0.760711	0.820234	0.829343	0.760711	0.999996	0.903685	0.999996	1	0.848188	0.72031	1	0.951645	0.863184
JNK Cascade ( EGF Signaling Pathway Diagram )// JNK Cascade ( PDGF Signaling Pathway )	77	4	26599	25.9718	49	0.275695	3.88503e-06	0.000645731	97.9592	MAP2K4 (6.95 %) MAPK8 (2.86 %) JUN (0.41 %)	0.00437806	0.0150431	0.0750178	0.00398084	0.102459	0.0107119	0.0120921	0.0136671	0.0134703	0.0175935	0.12316	0.0181811	0.0373765	0.0213091	0.0335292	0.0448349	0.0404434	0.194098	0.0259825	0.0138638	0.28299	0.0415909	0.0226745	0.0250107	0.138415	0.0181811	0.0216994	0.0259825	0.0267592	0.0216994	0.1726	0.0352624	0.173919	0.260773	0.0285046	0.0193553	0.27537	0.0454062	0.0300534
Oxygen Dependent Proline Hydroxylation Of Hypoxia Inducible Factor Alpha	282	18	90605	83.888	117	0.144486	5.0551e-06	0.000836389	75.2137	VHL (15.95 %) HIF3A ( 3.27 %) CUL2 ( 3.07 %) HIF1A ( 2.45 %) EPAS1 ( 1.64 %) EGLN2 ( 1.43 %) UBC ( 1.43 %) EGLN1 ( 1.02 %) EGLN3 ( 0.61 %) UBA52 ( 0.61 %) RBX1 ( 0.20 %) UBE2D1 ( 0.20 %) UBE2D2 ( 0.20 %) UBE2D3 ( 0.20 %)	0.0183697	0.0620411	0.280728	0.0167138	0.366675	0.0444886	0.0501088	0.0564914	0.055696	0.072261	0.426142	0.0746036	0.148679	0.0869979	0.134208	0.176204	0.160081	0.598223	0.105279	0.0572862	0.754807	0.164317	0.0923681	0.101501	0.467161	0.0746036	0.0885355	0.105279	0.10829	0.0885355	0.550947	0.14075	0.553964	0.721063	0.115028	0.0792711	0.743607	0.178284	0.120974
P73 Transcription Factor Network	324	79	427589	231.636	272	0.0697636	1.17799e-05	0.00194022	43.0147	RB1 (20.65 %) BRCA2 (12.68 %) EP300 ( 9.20 %) RNF43 ( 6.95 %) ABL1 ( 6.34 %) WT1 ( 6.13 %) UBE4B ( 4.70 %) FASN ( 4.50 %) TP63 ( 4.29 %) JAK1 ( 4.09 %) GATA1 ( 3.68 %) BAX ( 3.27 %) BUB1 ( 3.27 %) NTRK1 ( 2.86 %) PLK1 ( 2.86 %) NEDD4L ( 2.66 %) CHEK1 ( 2.45 %) WWOX ( 2.45 %) JAG2 ( 2.25 %) PML ( 2.25 %) CLCA2 ( 2.04 %) FAS ( 1.84 %) MDM2 ( 1.84 %) RELA ( 1.84 %) SERPINE1 ( 1.84 %) SIRT1 ( 1.84 %)…	0.0927014	0.285427	0.822537	0.0846417	0.908984	0.212417	0.236423	0.262963	0.259696	0.325347	0.945746	0.334238	0.57027	0.379714	0.530534	0.638342	0.599624	0.991642	0.44217	0.266215	0.999374	0.610107	0.39862	0.4297	0.963235	0.334238	0.385175	0.44217	0.451951	0.385175	0.985018	0.548851	0.985538	0.998768	0.473333	0.351669	0.999208	0.643108	0.491639
Gap Filling DNA Repair Synthesis And Ligation In GG NER	315	23	111946	99.2752	132	0.123733	1.57194e-05	0.00257741	60.6061	LIG1 (11.45 %) POLE ( 7.57 %) POLD1 ( 3.89 %) RFC1 ( 3.68 %) LIG3 ( 3.27 %) POLD3 ( 2.86 %) POLK ( 2.25 %) RPA1 ( 2.04 %) XRCC1 ( 2.04 %) RFC4 ( 1.43 %) RFC5 ( 1.43 %) UBC ( 1.43 %) PCNA ( 1.02 %) POLE2 ( 0.82 %) RPA3 ( 0.82 %) UBA52 ( 0.61 %) POLD2 ( 0.41 %) RFC2 ( 0.41 %) RPA2 ( 0.20 %)	0.0232569	0.0780747	0.341783	0.0211652	0.439953	0.0561231	0.0631638	0.0711461	0.070152	0.0908054	0.505832	0.0937182	0.18478	0.109096	0.167153	0.218088	0.198613	0.685675	0.131676	0.072139	0.832056	0.20374	0.115742	0.127019	0.550224	0.0937182	0.111	0.131676	0.135383	0.111	0.63801	0.175132	0.641094	0.802195	0.143666	0.0995159	0.82226	0.220593	0.150962
Leucine Stimulation On Insulin Signaling	366	15	114232	97.2611	129	0.12265	2.41861e-05	0.00394786	70.5426	MTOR (7.98 %) PIK3CG (6.95 %) IRS1 (4.50 %) INSR (4.29 %) TSC2 (3.48 %) TSC1 (2.66 %) AKT1 (2.25 %) RPS6KB1 (1.64 %) PIK3R6 (1.43 %) IRS2 (1.23 %) RHEB (1.23 %) SLC7A5 (0.82 %)	0.0225858	0.0758846	0.333699	0.0205538	0.430395	0.0545304	0.0613779	0.0691429	0.0681758	0.0882756	0.495559	0.0911114	0.179904	0.106087	0.162694	0.212453	0.193417	0.674876	0.12809	0.070109	0.823079	0.198427	0.112561	0.123551	0.539611	0.0911114	0.107942	0.12809	0.131704	0.107942	0.627113	0.170483	0.630198	0.792614	0.139781	0.0967565	0.813069	0.214902	0.146897
Activation Of Matrix Metalloproteinases	241	32	118361	105.55	138	0.11642	2.46555e-05	0.00400652	65.942	PLG (5.32 %) MMP16 (4.09 %) COL18A1 (3.89 %) MMP9 (3.48 %) FURIN (3.07 %) KLKB1 (3.07 %) MMP2 (3.07 %) MMP15 (2.66 %) MMP8 (2.66 %) MMP7 (2.04 %) MMP10 (1.84 %) MMP3 (1.43 %) PRSS1 (1.43 %) CTSV (1.23 %) ELANE (1.23 %) MMP11 (1.23 %) MMP14 (1.23 %) CTSG (0.82 %) KLK2 (0.82 %) MMP1 (0.82 %) MMP25 (0.82 %) MMP17 (0.61 %) MMP24 (0.61 %) TIMP2 (0.61 %) TIMP1 (0.41 %) TPSAB1 (0.41 %) CMA1 (0.20 %) CTR…	0.0254106	0.0850783	0.367107	0.0231275	0.469596	0.0612234	0.0688803	0.0775546	0.0764747	0.0988884	0.537451	0.102046	0.200255	0.118698	0.181321	0.235926	0.215086	0.718013	0.1431	0.0786332	0.857938	0.220577	0.125887	0.138073	0.582703	0.102046	0.120758	0.1431	0.147101	0.120758	0.670922	0.189896	0.673987	0.83009	0.156035	0.108327	0.84885	0.238603	0.163897
[CGB Protein Results In Increased Activity Of LHCGR Protein]// [N (2 Cyclohexyloxy 4 Nitrophenyl)methanesulfonamide Results In Decreased Activity Of PTGS2 Protein] Inhibits The Reaction [CGB Protein Results In Increased Chemical Synthesis Of Dinoprost]// [N3 Cyclopropyl 7 ((4 (1 Methylethyl)phenyl)methyl) 7H Pyrrolo(3// 2 F)quinazoline 1//3 Diamine Binds To F2R Protein] Promotes The Reaction [CGB…	264	6	13875	13.9819	30	0.331555	4.40704e-05	0.00712961	100	LHCGR (5.32 %) STAR (0.41 %) CGB3 (0.20 %) CGB5 (0.20 %)	0.0022298	0.00768189	0.0388972	0.0020273	0.0535106	0.00546427	0.00617041	0.00697682	0.00687606	0.00898997	0.0646806	0.00929159	0.0191937	0.0108987	0.0172013	0.0230674	0.0207848	0.103976	0.0133044	0.00707757	0.155701	0.0213807	0.011601	0.0128037	0.0729951	0.00929159	0.0110994	0.0133044	0.0137048	0.0110994	0.0918941	0.0180984	0.092631	0.142491	0.0146051	0.00989456	0.151148	0.0233647	0.0154047
FGFR2c Ligand Binding And Activation	52	13	47547	53.568	79	0.168722	4.74342e-05	0.00763984	82.2785	FGFR2 (10.84 %) FGF23 ( 1.43 %) FGF5 ( 1.43 %) FGF2 ( 1.02 %) FGF20 ( 1.02 %) FGF6 ( 1.02 %) FGF8 ( 0.82 %) FGF1 ( 0.61 %) FGF16 ( 0.61 %) FGF17 ( 0.61 %) FGF18 ( 0.61 %) FGF9 ( 0.20 %)	0.010244	0.0349457	0.167234	0.00931708	0.224057	0.0249573	0.0281466	0.0317787	0.0313254	0.0407997	0.265406	0.0421456	0.0855159	0.0492918	0.0769155	0.102057	0.0923386	0.397349	0.0599113	0.0322318	0.541909	0.0948839	0.0524015	0.0577087	0.295047	0.0421456	0.0501813	0.0599113	0.0616696	0.0501813	0.358942	0.0807957	0.361338	0.507902	0.0656139	0.0448317	0.530403	0.103317	0.0691059
LPA Receptor Mediated Events	255	65	467078	242.009	279	0.0617731	5.58002e-05	0.0089477	45.8781	EGFR (16.56 %) PIK3R1 (10.22 %) TIAM1 ( 6.95 %) ADCY2 ( 6.34 %) ADCY8 ( 6.13 %) PRKD1 ( 5.73 %) ADCY5 ( 5.32 %) ADCY1 ( 4.91 %) PTK2 ( 4.09 %) ADCY9 ( 3.89 %) PLCG1 ( 3.89 %) MMP9 ( 3.48 %) GAB1 ( 3.27 %) GSK3B ( 3.27 %) PLCB3 ( 3.27 %) ARHGEF1 ( 3.07 %) MMP2 ( 3.07 %) PRKCD ( 2.86 %) ADCY4 ( 2.66 %) ADCY7 ( 2.45 %) LPAR3 ( 2.45 %) MAPT ( 2.45 %) RHOA ( 2.45 %) ADCY6 ( 2.25 %) AKT1 ( 2.25 %) GNAQ…	0.100663	0.306858	0.84827	0.0919472	0.926749	0.229274	0.254858	0.283059	0.279593	0.34898	0.958336	0.358331	0.601928	0.405981	0.561621	0.670179	0.631489	0.994582	0.470905	0.286508	0.999679	0.642	0.4257	0.457992	0.972745	0.358331	0.411683	0.470905	0.481014	0.411683	0.989761	0.580241	0.990148	0.999329	0.503058	0.376632	0.999586	0.674917	0.521866
Integrin Linked Kinase Signaling	254	46	312994	197.459	231	0.0681358	0.000167799	0.0267889	61.039	CTNNB1 (18.81 %) TNS1 ( 6.54 %) IQGAP1 ( 5.52 %) ARHGEF7 ( 4.50 %) RICTOR ( 4.50 %) ZEB1 ( 4.50 %) PPP1R12A ( 3.48 %) GSK3B ( 3.27 %) PARP1 ( 3.07 %) ARHGEF6 ( 2.86 %) ACTN1 ( 2.66 %) AKT1 ( 2.25 %) GIT2 ( 2.25 %) CKAP5 ( 2.04 %) HSP90AA1 ( 1.84 %) LEF1 ( 1.84 %) RUVBL1 ( 1.84 %) XPO1 ( 1.84 %) AURKA ( 1.64 %) ELMO2 ( 1.64 %) PARVB ( 1.64 %) TACC3 ( 1.64 %) PARVG ( 1.43 %) DIAPH1 ( 1.23 %) ILKAP …	0.0694029	0.220016	0.72151	0.0632978	0.830019	0.161845	0.18081	0.201959	0.199345	0.252473	0.88405	0.259769	0.464457	0.297497	0.428267	0.52857	0.491752	0.970917	0.350514	0.204564	0.995719	0.501625	0.313392	0.339809	0.913041	0.259769	0.302076	0.350514	0.358952	0.302076	0.955221	0.444846	0.956377	0.99294	0.377541	0.274149	0.994909	0.533171	0.393611
IRF3 Mediated Activation Of Type 1 IFN	197	6	27786	36.3913	56	0.187191	0.000295703	0.0470026	82.1429	NLRP4 (6.34 %) ZBP1 (2.66 %) DTX4 (1.84 %) TBK1 (1.84 %) IRF3 (0.82 %) TMEM173 (0.41 %)	0.00643558	0.022057	0.108409	0.00585224	0.147056	0.0157226	0.0177425	0.0200459	0.0197583	0.0257808	0.175846	0.0266382	0.0545111	0.0311979	0.0489452	0.0652709	0.0589402	0.27206	0.0379975	0.0203334	0.387074	0.0605958	0.0331861	0.0365849	0.196858	0.0266382	0.0317664	0.0379975	0.0391261	0.0317664	0.243307	0.0514539	0.245082	0.358925	0.0416607	0.0283506	0.377466	0.0660934	0.043908
TGFBR1 LBD Mutants In Cancer// TGFBR2 Kinase Domain Mutants In Cancer	238	4	17363	24.0933	41	0.230887	0.000308107	0.0487613	95.122	TGFBR2 (4.50 %) TGFBR1 (3.48 %) FKBP1A (0.41 %) TGFB1 (0.41 %)	0.00402635	0.0138406	0.0691934	0.00366099	0.0946149	0.00985394	0.0111242	0.0125739	0.0123928	0.0161888	0.113834	0.0167299	0.0344203	0.0196108	0.0308723	0.0413015	0.0372493	0.179977	0.0239162	0.0127549	0.26353	0.038308	0.0208685	0.0230208	0.12802	0.0167299	0.0199703	0.0239162	0.024632	0.0199703	0.159885	0.0324705	0.161116	0.242574	0.0262405	0.0178112	0.256337	0.0418288	0.027668
TRIF Mediated Programmed Cell Death	347	10	36964	46.2343	67	0.16111	0.000391142	0.0616345	85.0746	CASP8 (3.68 %) TLR3 (2.86 %) TICAM1 (2.45 %) TLR4 (2.25 %) CD14 (1.23 %) RIPK1 (1.23 %) RIPK3 (1.23 %) LY96 (0.61 %) TICAM2 (0.61 %) FADD (0.20 %)	0.0085522	0.0292352	0.14157	0.00777776	0.190713	0.0208614	0.0235336	0.0265786	0.0261985	0.0341496	0.226848	0.0352802	0.0718556	0.0412876	0.0645802	0.0858804	0.0776352	0.344542	0.0502285	0.0269585	0.478581	0.0797933	0.043904	0.0483727	0.252959	0.0352802	0.0420358	0.0502285	0.0517106	0.0420358	0.309879	0.0678611	0.312031	0.446486	0.0550367	0.0375373	0.467679	0.0869505	0.0579835
Collagen Degradation	243	39	201008	149.855	179	0.0771816	0.00044942	0.0705125	53.6313	COL12A1 (11.66 %) COL14A1 ( 6.95 %) COL18A1 ( 3.89 %) COL15A1 ( 3.48 %) COL19A1 ( 3.48 %) MMP9 ( 3.48 %) COL17A1 ( 3.07 %) FURIN ( 3.07 %) MMP2 ( 3.07 %) COL16A1 ( 2.86 %) COL25A1 ( 2.86 %) MMP15 ( 2.66 %) MMP8 ( 2.66 %) ADAM17 ( 2.45 %) COL9A1 ( 2.45 %) MMP19 ( 2.45 %) MMP7 ( 2.04 %) MMP10 ( 1.84 %) ADAM10 ( 1.64 %) ADAM9 ( 1.64 %) COL9A2 ( 1.64 %) CTSL ( 1.64 %) MMP3 ( 1.43 %) COL13A1 ( 1.23 %)…	0.0435316	0.142516	0.546618	0.0396538	0.665963	0.10349	0.116096	0.130287	0.128526	0.164774	0.736369	0.169828	0.320506	0.19627	0.292449	0.372057	0.342148	0.887967	0.234362	0.132045	0.965764	0.350085	0.207572	0.226578	0.779362	0.169828	0.199515	0.234362	0.240532	0.199515	0.853674	0.305215	0.856023	0.953344	0.254235	0.179844	0.961889	0.375857	0.266208
JAK/STAT Signaling Pathway	76	15	106359	101.022	127	0.0993881	0.000480149	0.0750104	59.8425	JAK2 (9.82 %) JAK3 (5.73 %) PTPRC (5.73 %) JAK1 (4.09 %) STAT5B (3.89 %) STAT1 (3.27 %) STAT4 (2.25 %) PIAS3 (2.04 %) STAT3 (2.04 %) STAT5A (1.84 %) PIAS1 (1.23 %) PIAS2 (1.02 %) STAT6 (0.82 %)	0.0238468	0.0799968	0.348813	0.0217026	0.448227	0.0575217	0.0647318	0.0729044	0.0718867	0.0930248	0.514694	0.096005	0.189045	0.111735	0.171054	0.223011	0.203155	0.694877	0.134817	0.0739209	0.839575	0.208383	0.11853	0.130058	0.559357	0.096005	0.113681	0.134817	0.138606	0.113681	0.647331	0.179199	0.650413	0.810256	0.147069	0.101936	0.829971	0.225564	0.154522
GRB2:SOS Provides Linkage To MAPK Signaling For Integrins	62	15	118635	110.532	137	0.093231	0.000521149	0.0810677	64.9635	FN1 (9.41 %) VWF (6.54 %) FGA (4.50 %) TLN1 (4.29 %) PTK2 (4.09 %) APBB1IP (3.89 %) SOS1 (3.07 %) ITGB3 (2.66 %) GRB2 (2.25 %) ITGA2B (2.04 %) FGG (1.43 %) FGB (1.23 %) SRC (0.82 %) RAP1A (0.41 %) RAP1B (0.41 %)	0.0271896	0.0908347	0.387328	0.0247487	0.492941	0.065424	0.0735853	0.0828253	0.0816754	0.105524	0.562085	0.10888	0.21284	0.126568	0.192865	0.250382	0.228464	0.742247	0.152443	0.0839739	0.876314	0.234243	0.134195	0.147116	0.607805	0.10888	0.128754	0.152443	0.15668	0.128754	0.695887	0.201916	0.69892	0.850177	0.166137	0.115555	0.867822	0.253194	0.174454
Activated Point Mutants Of FGFR2// Phospholipase C Mediated Cascade; FGFR2	1	18	70533	74.0233	95	0.108355	0.00170339	0.263844	72.6316	FGFR2 (10.84 %) PLCG1 ( 3.89 %) FGF23 ( 1.43 %) FGF5 ( 1.43 %) FGF10 ( 1.02 %) FGF2 ( 1.02 %) FGF20 ( 1.02 %) FGF3 ( 1.02 %) FGF6 ( 1.02 %) FGF8 ( 0.82 %) FGF1 ( 0.61 %) FGF16 ( 0.61 %) FGF17 ( 0.61 %) FGF18 ( 0.61 %) FGF7 ( 0.61 %) FGF22 ( 0.20 %) FGF9 ( 0.20 %)	0.0155162	0.0525885	0.242648	0.0141157	0.319727	0.0376566	0.042433	0.0478627	0.0471857	0.0613028	0.374013	0.0633024	0.126952	0.0738951	0.114452	0.150822	0.136825	0.53657	0.08956	0.0485393	0.694448	0.140499	0.0784917	0.0863185	0.41197	0.0633024	0.0752107	0.08956	0.0921449	0.0752107	0.490982	0.120099	0.493868	0.659344	0.0979342	0.0672888	0.682717	0.152631	0.103049
MAP3K8 (TPL2) Dependent MAPK1/3 Activation	79	16	84177	83.6095	105	0.0989337	0.00199702	0.308015	74.2857	MAP2K4 (6.95 %) CHUK (4.70 %) CUL1 (3.27 %) FBXW11 (2.86 %) NFKB1 (2.04 %) BTRC (1.84 %) MAP2K1 (1.84 %) IKBKB (1.64 %) UBC (1.43 %) TNIP2 (1.02 %) MAP3K8 (0.61 %) UBA52 (0.61 %) IKBKG (0.41 %) SKP1 (0.41 %)	0.0182862	0.0617655	0.27964	0.0166378	0.365346	0.0442891	0.0498848	0.0562397	0.0554477	0.0719418	0.424678	0.0742745	0.14805	0.0866167	0.133635	0.175472	0.159408	0.596539	0.104822	0.0570311	0.753221	0.163629	0.0919645	0.10106	0.46562	0.0742745	0.0881479	0.104822	0.107821	0.0881479	0.549295	0.140152	0.552309	0.719424	0.114532	0.0789222	0.742001	0.177544	0.120454
BCR	10	161	1021557	341.803	367	0.0308908	0.00234813	0.360641	28.0654	BRAF (21.06 %) RB1 (20.65 %) CTNNB1 (18.81 %) CARD11 (10.63 %) PIK3R1 (10.22 %) ITPR1 ( 8.18 %) PTPN11 ( 8.18 %) CBL ( 7.98 %) PIK3CG ( 6.95 %) ITPR2 ( 6.13 %) CHST15 ( 5.93 %) PRKD1 ( 5.73 %) PTPRC ( 5.73 %) PRKCB ( 5.11 %) ITK ( 4.91 %) CHUK ( 4.70 %) ATP2B4 ( 4.50 %) PLCG2 ( 4.50 %) VAV1 ( 4.29 %) CR2 ( 4.09 %) PTK2 ( 4.09 %) PLCG1 ( 3.89 %) RAPGEF1 ( 3.89 %) RASA1 ( 3.89 %) VAV2 ( 3.89 %) CD2…	0.20753	0.552254	0.983981	0.190594	0.996754	0.435	0.475305	0.51786	0.512735	0.609753	0.999058	0.621937	0.867265	0.680775	0.836009	0.912116	0.887922	0.999989	0.752317	0.522931	1	0.894811	0.703547	0.738871	0.999628	0.621937	0.687454	0.752317	0.762573	0.687454	0.999957	0.850894	0.99996	1	0.784124	0.645175	1	0.91486	0.801632
JNK Cascade ( TGF Beta Signaling(through TAK1) )	231	6	44881	54.1157	72	0.12401	0.00290353	0.44407	83.3333	MAP2K4 (6.95 %) MAPK10 (3.48 %) MAPK8 (2.86 %) MAPK9 (2.66 %) MAP3K7 (1.64 %) JUN (0.41 %)	0.0103744	0.0353848	0.169182	0.00943573	0.226572	0.0252726	0.0285016	0.0321787	0.0317198	0.0413108	0.268299	0.0426732	0.0865613	0.0499065	0.0778603	0.103293	0.093463	0.401241	0.0606541	0.0326374	0.546462	0.0960377	0.0530538	0.0584251	0.298194	0.0426732	0.0508068	0.0606541	0.0624335	0.0508068	0.362579	0.081786	0.364992	0.512346	0.0664249	0.0453921	0.534923	0.104567	0.0699585
MyD88 Dependent Cascade Initiated On Endosome// TRAF6 Mediated Induction Of NFkB And MAP Kinases Upon TLR7/8 Or 9 Activation	86	10	45491	47.0659	64	0.133474	0.00311555	0.474502	78.125	TLR8 (3.68 %) TLR7 (3.48 %) TLR9 (2.86 %) IRAK2 (1.84 %) IRAK4 (1.64 %) ECSIT (1.23 %) IRAK1 (1.02 %) MYD88 (0.82 %) TRAF6 (0.82 %)	0.00873902	0.0298669	0.14444	0.00794773	0.194461	0.0213142	0.0240436	0.0271537	0.0267655	0.0348856	0.2312	0.0360401	0.0733729	0.042174	0.0659493	0.0876796	0.0792692	0.350589	0.0513018	0.0275418	0.485978	0.0814707	0.0448453	0.0494074	0.257724	0.0360401	0.042938	0.0513018	0.0528146	0.042938	0.315472	0.0692972	0.317653	0.453623	0.0562096	0.0383449	0.474993	0.0887709	0.0592172
Fatty Acids Bound To GPR40 (FFAR1) Regulate Insulin Secretion	352	8	48585	57.6338	75	0.114384	0.00432066	0.6553	82.6667	PLCB1 (4.91 %) PLCB3 (3.27 %) GNAQ (2.25 %) PLCB2 (2.25 %) GNA14 (1.84 %) GNA11 (1.43 %) GNA15 (1.23 %) FFAR1 (0.82 %)	0.0112258	0.0382485	0.181794	0.0102105	0.242799	0.0273296	0.0308172	0.0347877	0.0342923	0.0446429	0.286922	0.0461125	0.0933612	0.0539122	0.0840085	0.111325	0.100775	0.426057	0.0654924	0.0352829	0.575112	0.103539	0.0573045	0.0630916	0.318406	0.0461125	0.0548827	0.0654924	0.0674086	0.0548827	0.385834	0.0882291	0.38835	0.540409	0.0717056	0.0490449	0.563398	0.112692	0.0755086
NAD+ + (S) Lactic Acid = NADH + Pyruvic Acid ( Glycolysis And Gluconeogenesis )// NAD+ + (S) Lactic Acid = NADH + Pyruvic Acid ( Pyruvate Metabolism )// NAD+ + 2 Hydroxy Butanoic Acid = NADH + 2 Oxo Butanoic Acid ( Propanoate Metabolism )// NAD+ + 3 Mercapto Lactic Acid = NADH + 3 Mercapto Pyruvic Acid ( Methionine And Cysteine Metabolism )	370	4	12981	18.4944	30	0.21008	0.00468266	0.707256	93.3333	LDHA (2.86 %) LDHB (1.64 %) LDHAL6B (1.43 %) LDHC (0.61 %)	0.00301173	0.0103658	0.0521959	0.00273831	0.0716162	0.00737624	0.00832843	0.00941553	0.00927971	0.0121281	0.0863897	0.0125343	0.0258468	0.0146981	0.023172	0.0310418	0.0279815	0.137867	0.0179349	0.00955133	0.204424	0.0287807	0.0156432	0.0172614	0.0973462	0.0125343	0.0149682	0.0179349	0.0184733	0.0149682	0.122123	0.0243766	0.123085	0.187559	0.0196837	0.0133463	0.198622	0.0314402	0.0207583
P130Cas Linkage To MAPK Signaling For Integrins	90	15	117924	107.512	128	0.0757524	0.00519852	0.781926	67.1875	FN1 (9.41 %) VWF (6.54 %) FGA (4.50 %) TLN1 (4.29 %) PTK2 (4.09 %) APBB1IP (3.89 %) ITGB3 (2.66 %) ITGA2B (2.04 %) FGG (1.43 %) FGB (1.23 %) BCAR1 (1.02 %) SRC (0.82 %) RAP1A (0.41 %) RAP1B (0.41 %)	0.0261038	0.0873243	0.375059	0.0237592	0.478813	0.0628614	0.0707153	0.0796107	0.0785035	0.101478	0.547204	0.104713	0.205179	0.121771	0.185836	0.241588	0.220323	0.72771	0.146751	0.0807166	0.865398	0.225927	0.129131	0.141606	0.592664	0.104713	0.12388	0.146751	0.150844	0.12388	0.680878	0.194598	0.683933	0.838214	0.159983	0.111149	0.856542	0.244319	0.168024
Neurophilin Interactions With VEGF And VEGFR	277	4	44227	53.4838	70	0.116876	0.00524139	0.78513	77.1429	FLT1 (7.0 %) KDR (6.5 %) NRP2 (2.9 %) NRP1 (2.0 %)	0.010224	0.0348783	0.166935	0.00929888	0.223671	0.0249089	0.0280921	0.0317173	0.0312649	0.0407213	0.264961	0.0420646	0.0853554	0.0491974	0.0767704	0.101867	0.0921659	0.39675	0.0597972	0.0321695	0.541206	0.0947067	0.0523013	0.0575987	0.294563	0.0420646	0.0500853	0.0597972	0.0615523	0.0500853	0.358383	0.0806436	0.360776	0.507216	0.0654894	0.0447457	0.529706	0.103125	0.0689751
RIG I/MDA5 Mediated Induction Of IFN Alpha/beta Pathways	206	13	73112	76.957	95	0.0914756	0.00634844	0.947062	76.8421	HERC5 (4.70 %) NLRC5 (4.70 %) IFIH1 (3.68 %) DDX58 (3.27 %) NLRX1 (2.86 %) UBA7 (2.45 %) TKFC (1.64 %) DHX58 (1.02 %) TRIM25 (1.02 %) RNF135 (0.61 %) MAVS (0.41 %) ISG15 (0.20 %)	0.0163428	0.0553337	0.253871	0.0148682	0.33366	0.0396387	0.0446606	0.0503678	0.0496563	0.0644872	0.389567	0.0665869	0.133296	0.0777061	0.120215	0.158247	0.143621	0.555325	0.094137	0.0510788	0.713301	0.14746	0.082529	0.0907382	0.428504	0.0665869	0.0790866	0.094137	0.0968469	0.0790866	0.509114	0.126126	0.512047	0.67849	0.102914	0.0707722	0.701691	0.160136	0.108274
Cyclin D Associated Events In G1	150	38	211328	153.111	175	0.0580309	0.00656059	0.974716	60.5714	RB1 (20.65 %) RBL2 ( 4.70 %) RBL1 ( 3.68 %) CUL1 ( 3.27 %) PPP2R1A ( 2.86 %) TFDP1 ( 2.04 %) CCNH ( 1.43 %) CDKN1B ( 1.43 %) E2F5 ( 1.43 %) PPP2R2A ( 1.43 %) UBC ( 1.43 %) E2F2 ( 1.23 %) E2F3 ( 1.23 %) CDKN2A ( 1.02 %) PPP2R3B ( 1.02 %) TFDP2 ( 1.02 %) CDK4 ( 0.82 %) MNAT1 ( 0.82 %) PPP2R1B ( 0.82 %) CCND2 ( 0.61 %) CDK6 ( 0.61 %) CDK7 ( 0.61 %) CDKN2C ( 0.61 %) PPP2CA ( 0.61 %) PPP2CB ( 0.61 %) …	0.045079	0.147299	0.559478	0.0410663	0.679025	0.107046	0.120056	0.134692	0.132876	0.170227	0.748849	0.17543	0.32999	0.202633	0.301297	0.382597	0.352094	0.896542	0.241763	0.136504	0.969719	0.360194	0.21425	0.233773	0.791165	0.17543	0.205969	0.241763	0.248096	0.205969	0.863555	0.314358	0.865824	0.958266	0.262151	0.185738	0.96616	0.386468	0.274424
Drosophila Toll Like Receptor Signaling ( Drosophila Toll Like Receptor Signaling )	27	235	1481942	385.387	404	0.0204847	0.0103761	1.53532	22.0297	KIT (22.90 %) BRAF (21.06 %) EGFR (16.56 %) CASP5 (11.04 %) FGFR2 (10.84 %) PDGFRA (10.43 %) MET (10.02 %) JAK2 ( 9.82 %) BMPR2 ( 8.59 %) ALK ( 7.98 %) MTOR ( 7.98 %) FLT1 ( 6.95 %) MAP2K4 ( 6.95 %) KDR ( 6.54 %) ACVR2A ( 5.73 %) JAK3 ( 5.73 %) TLL1 ( 5.73 %) ACVR1B ( 5.52 %) PRKCB ( 5.11 %) CDC7 ( 4.91 %) ITK ( 4.91 %) RPS6KA2 ( 4.91 %) CHUK ( 4.70 %) FGFR3 ( 4.70 %) PRKCG ( 4.70 %) ESPL1 ( 4.50…	0.283815	0.68437	0.997349	0.261748	0.999732	0.55929	0.603699	0.649	0.643634	0.740874	0.999955	0.752405	0.944874	0.805774	0.925329	0.969496	0.956757	1	0.865056	0.654286	1	0.96052	0.825346	0.85442	0.999988	0.752405	0.81158	0.865056	0.873003	0.81158	0.999999	0.934861	1	1	0.889214	0.77395	1	0.970853	0.901878
TGF Beta Receptor Signaling In EMT (epithelial To Mesenchymal Transition)	179	16	72730	74.5795	90	0.081623	0.0157541	2.32166	73.3333	TGFBR2 (4.50 %) TGFBR1 (3.48 %) ARHGEF18 (3.07 %) CGN (2.66 %) RHOA (2.45 %) PARD3 (2.04 %) SMURF1 (1.84 %) UBC (1.43 %) PRKCZ (1.02 %) F11R (0.82 %) UBA52 (0.61 %) FKBP1A (0.41 %) PARD6A (0.41 %) TGFB1 (0.41 %)	0.0156716	0.0531047	0.244769	0.0142571	0.322366	0.0380292	0.0428518	0.0483338	0.0476502	0.0619017	0.376964	0.0639202	0.128147	0.0746121	0.115538	0.152222	0.138106	0.540152	0.0904214	0.0490168	0.698081	0.141811	0.0792513	0.0871503	0.415112	0.0639202	0.07594	0.0904214	0.0930299	0.07594	0.494438	0.121234	0.497334	0.663025	0.0988718	0.0679441	0.686371	0.154046	0.104033
Cytokine Receptor Degradation Signaling ( JAK STAT Pathway And Regulation Pathway Diagram )// Negative Regulation Of (Phosphorylation Of Cytokine Receptor) In JAK STAT Pathway ( JAK STAT Pathway And Regulation Pathway Diagram )	224	41	216776	161.327	180	0.0475654	0.018551	2.72281	60	LIFR (6.34 %) OSMR (4.50 %) IL12RB2 (3.89 %) LEPR (3.89 %) IL13RA2 (3.48 %) IL18R1 (3.27 %) CSF3R (3.07 %) IL7R (2.45 %) CSF2RB (2.25 %) IL6ST (2.04 %) PRLR (2.04 %) CNTFR (1.84 %) GHR (1.84 %) IL17RA (1.84 %) IL1R2 (1.84 %) IL2RG (1.84 %) IL3RA (1.84 %) MPL (1.84 %) IFNAR1 (1.64 %) IL5RA (1.64 %) CSF2RA (1.43 %) IFNGR1 (1.43 %) IL1R1 (1.43 %) IL1RAP (1.43 %) IL6R (1.43 %) CXCR2 (1.23 %) IL10RB (…	0.0491227	0.159708	0.591481	0.0447585	0.710887	0.116299	0.130349	0.146133	0.144175	0.18435	0.778829	0.189934	0.354226	0.219072	0.323967	0.409389	0.377454	0.91603	0.260826	0.148085	0.97805	0.385948	0.231488	0.252315	0.819188	0.189934	0.22264	0.260826	0.267564	0.22264	0.886401	0.337755	0.888463	0.968842	0.282502	0.200986	0.975218	0.413432	0.295525
IFN Alpha Signaling Pathway((JAK1 TYK2 STAT1 STAT2) ( IFN Alpha Signaling(JAK1 TYK2 STAT1 STAT2 STAT3) )// IFN Alpha Signaling Pathway(JAK1 TYK2 STAT1 STAT3) ( IFN Alpha Signaling(JAK1 TYK2 STAT1 STAT2 STAT3) )// IFN Alpha Signaling Pathway(JAK1 TYK2 STAT1) ( IFN Alpha Signaling(JAK1 TYK2 STAT1 STAT2 STAT3) )// IFN Alpha Signaling Pathway(JAK1 TYK2 STAT3) ( IFN Alpha Signaling(JAK1 TYK2 STAT1 STA…	194	21	62997	70.4405	85	0.0815965	0.0193883	2.83428	70.5882	JAK1 (4.09 %) STAT1 (3.27 %) STAT2 (2.25 %) IFNA2 (2.04 %) STAT3 (2.04 %) IFNA1 (1.64 %) IFNAR1 (1.64 %) IRF9 (1.23 %) IFNA10 (1.02 %) IFNA5 (1.02 %) IFNAR2 (1.02 %) TYK2 (1.02 %) IFNA14 (0.82 %) IFNA16 (0.82 %) IFNA4 (0.82 %) IFNA6 (0.61 %) IFNA8 (0.61 %) IFNA13 (0.41 %) IFNA17 (0.41 %) IFNA21 (0.41 %) IFNA7 (0.41 %)	0.0145314	0.0493105	0.22907	0.0132191	0.302762	0.0352919	0.0397746	0.0448723	0.0442365	0.0574982	0.354981	0.0593777	0.119341	0.0693383	0.107543	0.141899	0.128667	0.513211	0.0840818	0.0455076	0.670385	0.132138	0.0736628	0.0810296	0.391664	0.0593777	0.0705759	0.0840818	0.0865162	0.0705759	0.468524	0.112872	0.471345	0.635062	0.0919701	0.0631253	0.658554	0.143611	0.0967906
Heterotrimeric GPCR Signaling Pathway (through G Alpha I And Pertussis Toxin) ( GPCR Signaling (pertussis Toxin) )// Heterotrimeric GPCR Signaling Pathway (through G Alpha Q// PLC Beta And ERK Cascade) ( GPCR Signaling (G Alpha Q) )// Heterotrimeric GPCR Signaling Pathway (through G Alpha S ACs Epac BRaf And ERKcascade) ( GPCR Signaling (G Alpha S// Epac And ERK) )// Heterotrimeric GPCR Signaling…	65	252	1029106	339.422	358	0.0231425	0.0200537	2.91982	34.6369	BRAF (21.06 %) GRM1 ( 6.75 %) GRM5 ( 6.54 %) GRM7 ( 6.54 %) ADCY2 ( 6.34 %) ADCY8 ( 6.13 %) NRG1 ( 6.13 %) ADCY5 ( 5.32 %) PRKCB ( 5.11 %) ADCY1 ( 4.91 %) GNAS ( 4.91 %) GRM6 ( 4.91 %) PRKCG ( 4.70 %) PRKCI ( 4.50 %) GRM8 ( 4.29 %) GRM3 ( 4.09 %) ADCY9 ( 3.89 %) INHBA ( 3.89 %) AGTR2 ( 3.48 %) GRM2 ( 3.48 %) NRG3 ( 3.27 %) PRKCQ ( 3.27 %) IL16 ( 3.07 %) JAG1 ( 3.07 %) BMP10 ( 2.86 %) FZD3 ( 2.86 …	0.204093	0.545509	0.9827	0.187403	0.996389	0.428965	0.46897	0.51127	0.506173	0.60286	0.998928	0.615032	0.862182	0.673919	0.830398	0.908048	0.883264	0.999987	0.7458	0.516315	1	0.89031	0.696764	0.732264	0.99957	0.615032	0.680617	0.7458	0.756135	0.680617	0.999948	0.845519	0.999952	1	0.777877	0.638268	1	0.910866	0.79557
Polymerase Switching// Polymerase Switching On The C Strand Of The Telomere	214	14	55791	58.8292	71	0.0816657	0.0337721	4.89763	69.0141	POLD1 (3.89 %) RFC1 (3.68 %) POLD3 (2.86 %) POLA1 (2.45 %) RFC4 (1.43 %) RFC5 (1.43 %) POLA2 (1.23 %) PCNA (1.02 %) PRIM2 (1.02 %) PRIM1 (0.82 %) POLD2 (0.41 %) RFC2 (0.41 %)	0.0115205	0.0392385	0.186117	0.0104787	0.24834	0.0280411	0.031618	0.0356897	0.0351817	0.0457944	0.293261	0.047301	0.0957048	0.0552958	0.0861286	0.114091	0.103293	0.434411	0.0671624	0.0361975	0.584608	0.106123	0.0587724	0.0647026	0.325271	0.047301	0.0562904	0.0671624	0.0691257	0.0562904	0.39369	0.0904504	0.396239	0.549748	0.0735278	0.0503069	0.572849	0.115489	0.0774234
Energy Dependent Regulation Of MTOR By LKB1 AMPK	31	28	160794	134.563	150	0.0471664	0.0353827	5.11083	64.6667	MTOR (7.98 %) STK11 (7.16 %) RPTOR (4.50 %) TSC2 (3.48 %) PRKAA2 (3.27 %) TSC1 (2.66 %) CAB39L (2.04 %) PRKAA1 (2.04 %) RRAGB (1.64 %) STRADB (1.64 %) PPM1A (1.43 %) PRKAG2 (1.43 %) RRAGD (1.43 %) RHEB (1.23 %) PRKAB1 (1.02 %) PRKAB2 (1.02 %) PRKAG1 (1.02 %) PRKAG3 (1.02 %) RRAGC (1.02 %) STRADA (1.02 %) LAMTOR5 (0.61 %) CAB39 (0.41 %) LAMTOR2 (0.41 %) MLST8 (0.41 %) LAMTOR1 (0.20 %) LAMTOR3 (0.2…	0.0366729	0.121087	0.485227	0.0333953	0.601668	0.0876278	0.0984098	0.110576	0.109064	0.140279	0.673449	0.144648	0.277019	0.167577	0.25204	0.323353	0.296399	0.840792	0.200823	0.112085	0.941148	0.303533	0.177414	0.194008	0.71878	0.144648	0.1704	0.200823	0.206234	0.1704	0.800785	0.263386	0.803473	0.923686	0.218274	0.153319	0.935605	0.326791	0.228823
P53 Dependent G1 DNA Damage Response	160	7	21900	29.6102	39	0.119624	0.0368442	5.3009	92.3077	CCNA1 (3.27 %) CDKN1B (1.43 %) CCNE1 (1.23 %) CDK2 (1.02 %) CCNA2 (0.82 %) CCNE2 (0.61 %) CDKN1A (0.41 %)	0.00507577	0.0174255	0.0864709	0.00461541	0.117827	0.0124128	0.0140105	0.0158333	0.0156057	0.0203757	0.141381	0.0210552	0.0432175	0.0246715	0.0387811	0.0518097	0.0467519	0.221411	0.0300708	0.0160609	0.320104	0.0480739	0.0262494	0.0289484	0.158681	0.0210552	0.0251225	0.0300708	0.0309678	0.0251225	0.197272	0.04078	0.198756	0.295612	0.032983	0.0224129	0.311718	0.0524674	0.0347707
Signaling By FGFR2 IIIa TM	120	19	82828	82.8316	96	0.0640749	0.0379096	5.43271	83.3333	FGFR2 (10.84 %) POLR2A ( 3.07 %) NCBP1 ( 2.25 %) POLR2B ( 2.25 %) GTF2F1 ( 1.43 %) FGF2 ( 1.02 %) FGF1 ( 0.61 %) POLR2D ( 0.61 %) NCBP2 ( 0.41 %) POLR2E ( 0.41 %) POLR2F ( 0.41 %) POLR2H ( 0.41 %) GTF2F2 ( 0.20 %) POLR2C ( 0.20 %) POLR2I ( 0.20 %) POLR2K ( 0.20 %)	0.018054	0.0609985	0.276605	0.0164263	0.361637	0.0437341	0.0492614	0.0555393	0.0547569	0.0710533	0.420587	0.0733583	0.146298	0.0855554	0.132041	0.17343	0.157535	0.591817	0.103551	0.0563211	0.748755	0.161711	0.0908411	0.0998312	0.46131	0.0733583	0.0870688	0.103551	0.106515	0.0870688	0.544667	0.138486	0.547674	0.714817	0.11315	0.0779512	0.737482	0.175481	0.119006
Chemokine Receptors Bind Chemokines	222	57	137882	108.775	123	0.0533747	0.038463	5.4904	69.1057	ACKR3 (4.29 %) ACKR2 (2.66 %) CCR3 (2.25 %) CCR5 (1.84 %) CCR9 (1.64 %) CCR1 (1.43 %) CCR2 (1.43 %) CCR7 (1.43 %) CCR8 (1.43 %) CXCL9 (1.43 %) CXCR4 (1.43 %) ACKR4 (1.23 %) CXCL5 (1.23 %) CXCL8 (1.23 %) CXCR2 (1.23 %) XCR1 (1.23 %) CCRL2 (1.02 %) CX3CL1 (1.02 %) CX3CR1 (1.02 %) PPBP (1.02 %) CCL28 (0.82 %) CXCL11 (0.82 %) CXCR1 (0.82 %) CXCR3 (0.82 %) XCL2 (0.82 %) CXCL16 (0.61 %) PF4 (0.61 %) CC…	0.0265552	0.0887847	0.380187	0.0241705	0.484731	0.0639271	0.071909	0.0809479	0.0798229	0.103162	0.553448	0.106447	0.208372	0.123768	0.188764	0.245255	0.223716	0.733847	0.14912	0.0820715	0.870047	0.229394	0.131239	0.1439	0.599025	0.106447	0.125909	0.14912	0.153274	0.125909	0.687203	0.197647	0.690249	0.843297	0.162546	0.112982	0.861341	0.24802	0.170702
Coregulation Of Androgen Receptor Activity	309	61	443657	237.275	254	0.0295814	0.0420453	5.97831	46.4567	CTNNB1 (18.81 %) PRKDC (14.11 %) SVIL ( 6.54 %) BRCA1 ( 6.34 %) NCOA6 ( 5.73 %) ZNF318 ( 5.73 %) VAV3 ( 5.52 %) AR ( 5.32 %) NCOA2 ( 4.50 %) UBE3A ( 4.09 %) CASP8 ( 3.68 %) NRIP1 ( 3.48 %) TGIF1 ( 3.48 %) RPS6KA3 ( 3.27 %) APPL1 ( 3.07 %) MED1 ( 2.86 %) PELP1 ( 2.86 %) XRCC5 ( 2.66 %) LATS2 ( 2.45 %) TMF1 ( 2.45 %) ZMIZ1 ( 2.45 %) AKT1 ( 2.25 %) HIP1 ( 2.25 %) KDM3A ( 2.25 %) MAK ( 2.25 %) KDM4C …	0.0969749	0.296988	0.836821	0.0885621	0.918978	0.221492	0.246354	0.273796	0.270421	0.33811	0.952901	0.347253	0.587529	0.393925	0.54745	0.65576	0.617021	0.993374	0.457751	0.277156	0.999562	0.627528	0.41328	0.445033	0.968681	0.347253	0.399519	0.457751	0.467715	0.399519	0.987781	0.565946	0.988226	0.99911	0.48947	0.365162	0.99944	0.660515	0.50806
Hedgehog Signaling Events Mediated By Gli Proteins	253	49	370263	214.306	230	0.0306933	0.0505606	7.16112	43.4783	PTCH1 (20.65 %) CREBBP (14.31 %) GLI3 ( 7.77 %) GLI2 ( 4.91 %) GLI1 ( 4.09 %) IFT172 ( 4.09 %) SIN3A ( 4.09 %) GSK3B ( 3.27 %) RBBP7 ( 3.27 %) CSNK1D ( 2.86 %) FBXW11 ( 2.86 %) IFT88 ( 2.86 %) PRKCD ( 2.86 %) SMO ( 2.66 %) KIF3A ( 2.45 %) STK36 ( 2.45 %) AKT1 ( 2.25 %) MTSS1 ( 2.25 %) SIN3B ( 2.25 %) GNAO1 ( 2.04 %) BTRC ( 1.84 %) MAP2K1 ( 1.84 %) XPO1 ( 1.84 %) CSNK1E ( 1.64 %) CSNK1G3 ( 1.43 %)…	0.0803511	0.25126	0.774335	0.0733213	0.873007	0.185842	0.207254	0.231037	0.228103	0.287418	0.918658	0.295511	0.516748	0.337147	0.478512	0.583433	0.545309	0.983749	0.395032	0.233959	0.998255	0.555578	0.35458	0.383405	0.941816	0.295511	0.342175	0.395032	0.404176	0.342175	0.973138	0.496079	0.973944	0.996875	0.424247	0.311422	0.997864	0.588164	0.441519
Cyclin B2 Mediated Events	149	5	18210	25.1439	33	0.118081	0.0561661	7.90376	87.8788	CDC25A (2.2 %) CDC25B (1.8 %) CDK1 (1.4 %) CDC25C (1.2 %) CCNB2 (1.0 %)	0.00422235	0.0145109	0.0724435	0.00383924	0.0989942	0.0103321	0.0116637	0.0131832	0.0129934	0.0169718	0.119043	0.0175389	0.0360687	0.0205575	0.0323537	0.0432721	0.0390305	0.187876	0.0250682	0.013373	0.274438	0.0401388	0.0218753	0.0241302	0.133828	0.0175389	0.0209342	0.0250682	0.0258179	0.0209342	0.166994	0.0340272	0.168275	0.25277	0.0275028	0.0186719	0.267004	0.0438239	0.0289979
Negative Feedback Regulation Pathway Of TGF Beta Superfamily Signaling By (binding Of Smad6/7 And TGF Beta Receptor I) ( TGF Beta Super Family Signaling Pathway(canonical) )	232	8	51491	60.3248	71	0.0707622	0.0562383	7.90376	77.4648	ACVR1B (5.52 %) BMPR1A (3.48 %) TGFBR1 (3.48 %) BMPR1B (2.25 %) ACVR1 (1.64 %) ACVRL1 (1.64 %) SMAD7 (0.41 %) SMAD6 (0.20 %)	0.0118932	0.0404893	0.191554	0.0108179	0.255291	0.0289403	0.03263	0.0368296	0.0363057	0.0472491	0.3012	0.0488023	0.0986607	0.0570431	0.0888035	0.117577	0.10647	0.444805	0.0692708	0.0373533	0.596317	0.10938	0.060626	0.0667365	0.333856	0.0488023	0.0580682	0.0692708	0.0712933	0.0580682	0.403483	0.0932525	0.406073	0.561291	0.0758278	0.051901	0.584512	0.119015	0.0798399
Class IB PI3K Non Lipid Kinase Events	18	5	36296	45.545	55	0.0819223	0.0613965	8.59551	85.4545	PIK3CG (6.95 %) PDE3B (2.04 %) MAP2K1 (1.84 %) PIK3R6 (1.43 %) MAPK1 (0.61 %)	0.0083983	0.0287145	0.139198	0.00763774	0.187612	0.0204883	0.0231132	0.0261046	0.0257312	0.0335429	0.223244	0.0346538	0.070604	0.0405568	0.0634509	0.0843959	0.0762872	0.33952	0.0493436	0.0264779	0.472408	0.0784094	0.0431279	0.0475197	0.249011	0.0346538	0.0412921	0.0493436	0.0508002	0.0412921	0.305238	0.0666766	0.307365	0.440538	0.0540695	0.0368716	0.461579	0.0854483	0.0569661
NRAGE Signals Death Through JNK	257	45	442727	238.29	253	0.0260146	0.0650952	9.05349	48.2213	OBSCN (16.56 %) KALRN ( 7.57 %) TRIO ( 7.16 %) TIAM1 ( 6.95 %) MCF2 ( 6.75 %) VAV3 ( 5.52 %) AKAP13 ( 4.70 %) RASGRF2 ( 4.70 %) TIAM2 ( 4.70 %) ARHGEF7 ( 4.50 %) ARHGEF11 ( 4.29 %) VAV1 ( 4.29 %) ECT2 ( 3.89 %) FGD1 ( 3.89 %) ITSN1 ( 3.89 %) VAV2 ( 3.89 %) NGEF ( 3.48 %) ABR ( 3.07 %) ARHGEF18 ( 3.07 %) SOS1 ( 3.07 %) ARHGEF17 ( 2.86 %) ARHGEF6 ( 2.86 %) FGD3 ( 2.86 %) MAPK8 ( 2.86 %) SOS2 ( 2.86…	0.0977579	0.299091	0.839317	0.0892805	0.920691	0.223148	0.248164	0.275769	0.272375	0.340429	0.954109	0.349617	0.590623	0.3965	0.550491	0.658867	0.620134	0.993651	0.460566	0.279148	0.99959	0.630643	0.415934	0.447805	0.96959	0.349617	0.402118	0.460566	0.470562	0.402118	0.98823	0.569015	0.988662	0.999162	0.49238	0.36761	0.999475	0.663619	0.511018
Type II Interferon Signaling	240	23	74328	76.0399	87	0.0584776	0.0651652	9.05349	81.6092	PTPN11 (8.18 %) STAT2 (2.25 %) IFNGR1 (1.43 %) IRF1 (1.23 %) HIST1H4L (1.02 %) IFNB1 (1.02 %) HIST1H4I (0.82 %) ICAM1 (0.82 %) PSMB9 (0.82 %) HIST1H4D (0.61 %) HIST4H4 (0.61 %) IRF8 (0.61 %) HIST1H4B (0.41 %) HIST1H4E (0.41 %) HIST1H4J (0.41 %) IFI6 (0.41 %) HIST1H4A (0.20 %) HIST1H4F (0.20 %) HIST1H4H (0.20 %)	0.0160825	0.0544696	0.250353	0.0146312	0.329301	0.0390146	0.0439593	0.0495793	0.0488786	0.063485	0.384708	0.0655533	0.131302	0.076507	0.118403	0.155915	0.141485	0.549499	0.0926974	0.0502794	0.70749	0.145273	0.0812588	0.089348	0.423345	0.0655533	0.0778672	0.0926974	0.095368	0.0778672	0.503472	0.124231	0.506391	0.672576	0.101348	0.0696761	0.695839	0.157779	0.106631
Regulation Of Innate Immune Responses To Cytosolic DNA	205	14	62159	65.6293	76	0.0637159	0.0669467	9.26563	71.0526	NLRP4 (6.34 %) ZBP1 (2.66 %) TRIM32 (2.04 %) TRIM56 (2.04 %) DTX4 (1.84 %) TBK1 (1.84 %) DDX41 (1.43 %) UBC (1.43 %) IRF3 (0.82 %) TRIM21 (0.82 %) UBA52 (0.61 %) TMEM173 (0.41 %)	0.0132508	0.0450358	0.211069	0.0120535	0.280093	0.0322119	0.0363108	0.040974	0.0403923	0.0525336	0.329395	0.0542555	0.109356	0.0633861	0.0984892	0.13017	0.117954	0.481105	0.0769171	0.0415553	0.636278	0.121157	0.067353	0.0741143	0.364239	0.0542555	0.0645212	0.0769171	0.0791531	0.0645212	0.437868	0.103395	0.440588	0.600922	0.0841645	0.0576898	0.6244	0.13175	0.0885962
AndrogenReceptor	303	167	1169403	354.961	368	0.0156673	0.0717914	9.89851	24.7283	PTEN (38.24 %) RB1 (20.65 %) CTNNB1 (18.81 %) EGFR (16.56 %) CREBBP (14.31 %) PIK3R1 (10.22 %) EP300 ( 9.20 %) RUNX1 ( 8.18 %) NCOR2 ( 6.75 %) SVIL ( 6.54 %) BRCA1 ( 6.34 %) NCOR1 ( 6.34 %) FLNA ( 6.13 %) NCOA6 ( 5.73 %) AR ( 5.32 %) NSD1 ( 4.91 %) NCOA2 ( 4.50 %) ESR1 ( 4.29 %) PTK2 ( 4.09 %) SIN3A ( 4.09 %) UBE3A ( 4.09 %) BRINP1 ( 3.89 %) ERCC3 ( 3.89 %) SMAD3 ( 3.89 %) CASP8 ( 3.68 %) RBAK ( …	0.2277	0.590408	0.989869	0.209344	0.99828	0.469646	0.511504	0.555311	0.550058	0.648404	0.999565	0.660577	0.893884	0.718725	0.865788	0.93288	0.912064	0.999997	0.787814	0.560503	1	0.918047	0.740924	0.774981	0.999845	0.660577	0.725255	0.787814	0.797552	0.725255	0.999986	0.87925	0.999987	1	0.817859	0.683672	1	0.935203	0.834193
Acetylcholine Regulates Insulin Secretion	348	10	73871	79.3067	90	0.0549324	0.0727378	9.99115	77.7778	PLCB1 (4.91 %) CHRM3 (3.27 %) PLCB3 (3.27 %) GNAQ (2.25 %) PLCB2 (2.25 %) GNA14 (1.84 %) PRKCA (1.64 %) GNA11 (1.43 %) GNA15 (1.23 %) MARCKS (0.82 %)	0.0170182	0.0575725	0.262924	0.0154832	0.34484	0.0412564	0.0464783	0.0524114	0.0516718	0.067083	0.401998	0.0692641	0.138449	0.0808107	0.1249	0.16427	0.149137	0.570095	0.0978625	0.0531504	0.727849	0.153111	0.0858172	0.0943363	0.441678	0.0692641	0.0822439	0.0978625	0.100674	0.0822439	0.52346	0.131023	0.526425	0.693343	0.106966	0.073611	0.716359	0.166224	0.112523
Negative Regulators Of RIG I/MDA5 Signaling	202	34	193867	143.33	155	0.0339956	0.0911485	12.4532	62.5806	TNFAIP3 (7.36 %) CYLD (4.70 %) HERC5 (4.70 %) NLRC5 (4.70 %) IFIH1 (3.68 %) DDX58 (3.27 %) NLRX1 (2.86 %) TAX1BP1 (2.66 %) TRAF3 (2.45 %) UBA7 (2.45 %) RNF216 (2.25 %) ATG5 (1.84 %) TBK1 (1.84 %) IKBKE (1.64 %) ITCH (1.43 %) UBC (1.43 %) OTUD5 (1.02 %) PCBP2 (1.02 %) RNF125 (1.02 %) TRIM25 (1.02 %) IRF3 (0.82 %) UBE2K (0.82 %) PIN1 (0.61 %) RNF135 (0.61 %) UBA52 (0.61 %) MAVS (0.41 %) ISG15 (0.20…	0.0405235	0.133164	0.520596	0.0369084	0.639096	0.0965533	0.108367	0.121679	0.120026	0.154097	0.710367	0.158855	0.301726	0.183784	0.274967	0.351101	0.322421	0.869257	0.2198	0.123329	0.956561	0.330023	0.194457	0.21243	0.754538	0.158855	0.186848	0.2198	0.225646	0.186848	0.832424	0.287133	0.834926	0.942081	0.23864	0.168291	0.952009	0.354751	0.250007
VEGF And VEGFR Signaling Network// VEGF Binds To VEGFR Leading To Receptor Dimerization	295	10	79590	82.0853	92	0.0495223	0.0913464	12.4532	69.5652	FLT1 (6.95 %) KDR (6.54 %) FLT4 (3.68 %) NRP2 (2.86 %) VEGFC (2.86 %) NRP1 (2.04 %) VEGFA (1.02 %) PGF (0.61 %) VEGFB (0.61 %)	0.0178324	0.0602663	0.273699	0.0162245	0.358079	0.0432043	0.0486665	0.0548708	0.0540974	0.070205	0.416658	0.0724836	0.144624	0.084542	0.130518	0.171478	0.155745	0.587263	0.102336	0.0556434	0.74442	0.159878	0.0897682	0.098658	0.457168	0.0724836	0.0860383	0.102336	0.105268	0.0860383	0.540209	0.136894	0.543208	0.710351	0.11183	0.077024	0.733098	0.173508	0.117623
Constitutive Signaling By NOTCH1 T(7;9)(NOTCH1:M1580 K2555) Translocation Mutant	270	7	54449	63.005	72	0.0579576	0.094637	12.8537	83.3333	NOTCH1 (5.9 %) JAG1 (3.1 %) ADAM17 (2.5 %) JAG2 (2.2 %) DLL1 (1.8 %) ADAM10 (1.6 %) DLL4 (1.4 %)	0.0125721	0.0427649	0.20137	0.0114358	0.267795	0.0305772	0.0344718	0.0389037	0.0383508	0.0498946	0.31544	0.0515323	0.104023	0.0602194	0.0936585	0.123895	0.11223	0.463259	0.0731012	0.0394563	0.616815	0.115287	0.063995	0.0704321	0.349222	0.0515323	0.0612997	0.0731012	0.0752309	0.0612997	0.420928	0.0983373	0.423586	0.581572	0.0800049	0.0547994	0.604956	0.125405	0.0842278
[truncated: 96 more rows]
[truncated: 450 more columns]

## Sheet: GBM
Pathway	Internal Id	n.genes.in.rep	total Exonic Content Block length	(E)xpected n.mut in path	(O)bserved n.mut in path	log10 (oddRatio=(O/E))	pval	% FDR	ExclusiveCoverage	Mutated Genes	prob Br001X	prob Br018X	prob Br019X	prob Br02X	prob Br03X	prob Br04X	prob Br05X	prob Br06X	prob Br07X	prob Br08X	prob Br101X	prob Br102X	prob Br103X	prob Br104X	prob Br107X	prob Br10P	prob Br111X	prob Br112X	prob Br113X	prob Br117X	prob Br118X	prob Br11P	prob Br121X	prob Br122X	prob Br124X	prob Br126X	prob Br128X	prob Br129X	prob Br12P	prob Br130X	prob Br131X	prob Br132X	prob Br134X	prob Br136X	prob Br138X	prob Br139X	prob Br13X	prob Br140X	prob Br141X
[truncated: 233 more rows]
[truncated: 326 more columns]

## Sheet: HNSC
Pathway	Internal Id	n.genes.in.rep	total Exonic Content Block length	(E)xpected n.mut in path	(O)bserved n.mut in path	log10 (oddRatio=(O/E))	pval	% FDR	ExclusiveCoverage	Mutated Genes	prob HN_0-046-Tumor	prob HN_0-064-Tumor	prob HN_00076-Tumor	prob HN_00122-Tumor	prob HN_00190-Tumor	prob HN_00313-Tumor	prob HN_00338-Tumor	prob HN_00361-Tumor	prob HN_00378-Tumor	prob HN_00443-Tumor	prob HN_00466-Tumor	prob HN_00761-Tumor	prob HN_01000-Tumor	prob HN_62237-Tumor	prob HN_62298-Tumor	prob HN_62318-Tumor	prob HN_62332-Tumor	prob HN_62338-Tumor	prob HN_62374-Tumor	prob HN_62376-Tumor	prob HN_62415-Tumor	prob HN_62417-Tumor	prob HN_62421-Tumor	prob HN_62426-Tumor	prob HN_62432-Tumor	prob HN_62469-Tumor	prob HN_62481-Tumor	prob HN_62493-Tumor	prob HN_62505-Tumor	prob HN_62506-Tumor	prob HN_62515-Tumor	prob HN_62532-Tumor	prob HN_62539-Tumor	prob HN_62601-Tumor	prob HN_62602-Tumor	prob HN_62624-Tumor	prob HN_62646-Tumor	prob HN_62652-Tumor	prob HN_62671-Tumor
[truncated: 314 more rows]
[truncated: 336 more columns]

[truncated: 6 more sheets: KIRC, LUAD, OV, PRAD, SKCM, THCA]
