# Supplementary material for: Pathway-based dissection of the genomic heterogeneity of cancer hallmarks’ acquisition with SLAPenrich
Source: Sci Rep. 2018 Apr 30;8:6713. doi: 10.1038/s41598-018-25076-6 (PMC5928049; doi:10.1038/s41598-018-25076-6)
Supplement: Supplementary file 9 — Supplementary Table S7 [file 41598_2018_25076_MOESM9_ESM.xlsx]

## Sheet: Additional File 5 - hallmark cu
Hallmark	Keyword searched in pathway name	Keywork searched in the names of the composing genes
Sustaining Proliferative Signaling	Cell Cycle, Cell Division, Growth Hormone, EGF, ERBB, FGF, Signaling by FGFR, PI3, Signaling by AKT, Map, RAS, MTOR, MYC, CDK2, JAK/STAT, STAT3	BRAF
Evading Growth Suppressors	RB1, P53, APC, SMAD4, Senescence And Autophagy In Cancer, Cyclin, Degradation of Cyclin, Inactivation of Cyclin, Checkpoint, TFG Beta	PTEN
Avoiding Immune Destruction	immune, IFN, APC, MHC	NLRC5
Enabling Replicative Immortality	Telomer, Senescence, Recognition of DNA damage,
Tumour-Promoting Inflammation	inflammation, TFG, SMAD, chemokine, cytokine, interferon, IFN
Activating Invasion and Metastasis	EMT, E Cadherin, Metalloprot	SNAI1, ZEB, MTSS1, BRMS1, TIAM1, MMP9
Inducing Angiogenesis	Wnt Signaling Pathway, Hypoxia, Angiogen, Tie, PDGF, NOTCH, HIF, VEGF
Genome Instability and Mutation	Dna repair, DNA damage	BRCA
Resisting Cell Death	Apop, Death, BCL, FAS, TNFA, TRAIL, CD95
Deregulating Cellular Energetics	HIF, Glycolysis, Insulin, Warburg Effect, AMPK, Energy, Mitochondrial Beta Oxidation
