# Supplementary material for: Pathway-based dissection of the genomic heterogeneity of cancer hallmarks’ acquisition with SLAPenrich
Source: Sci Rep. 2018 Apr 30;8:6713. doi: 10.1038/s41598-018-25076-6 (PMC5928049; doi:10.1038/s41598-018-25076-6)
Supplement: Supplementary file 10 — Supplementary Table S8 [file 41598_2018_25076_MOESM10_ESM.xlsx]

## Sheet: Additional File 6 - HallMarks_p
internal id	Hallmark	Pathway(s)	Source(s)	Genes
79	Sustaining Proliferative Signaling	Activated Point Mutants Of FGFR2 // Phospholipase C Mediated Cascade; FGFR2	reactome	FGF1, FGF10, FGF16, FGF17, FGF18, FGF2, FGF20, FGF22, FGF23, FGF3, FGF4, FGF5, FGF6, FGF7, FGF8, FGF9, FGFR2, PLCG1
1764	Sustaining Proliferative Signaling	Activated TAK1 Mediates P38 MAPK Activation	reactome	IKBKG, IRAK1, IRAK2, MAP2K3, MAP2K6, MAP3K7, MAPK11, MAPK14, MAPKAPK2, MAPKAPK3, NOD1, NOD2, RIPK2, TAB1, TAB2, TAB3, TRAF6
97	Sustaining Proliferative Signaling	Activation Of RAS In B Cells	reactome	HRAS, KRAS, NRAS, RASGRP1, RASGRP3
37	Sustaining Proliferative Signaling	AKT(PKB) Activation Signaling ( IGF1 Signaling Pathway ) // AKT(PKB) Activation Signaling ( Insulin Receptor Signaling (D. Melanogaster) ) // AKT(PKB) Activation Signaling ( PDGF Signaling Pathway )	inoh	AKT1, AKT2, AKT3, PDPK1, PIK3CA, PIK3CB, PIK3CD
38	Sustaining Proliferative Signaling	AKT(PKB) Activation Signaling ( Insulin Receptor Signaling (Mammal) )	inoh	AKT1, AKT2, AKT3, MAPKAP1, MLST8, MTOR, PDPK1, PIK3CA, PIK3CB, PIK3CD, RICTOR, TSC1, TSC2
39	Sustaining Proliferative Signaling	AKT(PKB) Bad Signaling ( EPO Signaling Pathway(JAK2 STAT1 STAT3 STAT5) ) // AKT(PKB) Bad Signaling ( IL 7 Signaling(JAK1 JAK3 STAT5) ) // Positive Regulation Of (Transcription Of SOCS By STAT Dimer) In JAK STAT Pathway ( JAK STAT Pathway And Regulation Pathway Diagram ) // VEGF Signaling Pathway ( VEGF Signaling Pathway )	inoh	ACVR1, ACVR1B, ACVR2A, ACVR2B, ACVRL1, ADRBK1, ADRBK2, AKT1, AKT2, AKT3, ALK, AMHR2, ARAF, BAD, BMPR1A, BMPR1B, BMPR2, BRAF, BTK, CAMK2A, CAMK2B, CAMK2D, CAMK2G, CCNH, CDC7, CDK1, CDK2, CDK3, CDK4, CDK5, CDK6, CDK7, CDK8, CDK9, CHUK, CSK, CSNK1A1, CSNK1D, CSNK1E, CSNK1G1, CSNK1G2, CSNK1G3, EGFR, FGFR1, FGFR2, FGFR3, FGFR4, FIGF, FLT1, FLT4, FYN, GFRA1, GRK4, GRK5, GRK6, GRK7, GSK3A, GSK3B, IGF1R,…
42	Sustaining Proliferative Signaling	AKT(PKB) MTOR Signaling ( Insulin Receptor Signaling (Mammal) ) // AKT(PKB) TOR Signaling ( Insulin Receptor Signaling (D. Melanogaster) )	inoh	AKT1, AKT2, AKT3, EIF4A1, EIF4A2, EIF4E, EIF4EBP1, EIF4G1, EIF4G3, MTOR, PTEN, RHEB, RPS6, RPS6KB1, TSC2
166	Sustaining Proliferative Signaling	Angiogenesis	panther	AKT1, AKT2, AKT3, ANGPT1, ANGPT2, APC, APC2, ARAF, ARHGAP1, ARHGAP8, AXIN1, BIRC5, BRAF, CASP9, CRK, CRKL, CTNNB1, DLK1, DLL3, DLL4, DOK2, DVL1, DVL2, DVL3, EFNB1, EFNB2, EPHB1, EPHB2, EPHB3, ETS1, F2R, F3, F7, FGF1, FGFR1, FOS, FRS2, FZD1, FZD2, FZD3, FZD5, GRB14, GRB7, GSK3B, HIF1A, HRAS, HSPB1, JAG1, JAG2, JAK1, JUN, KDR, MAP2K1, MAP2K2, MAP2K4, MAP3K1, MAPK1, MAPK14, MAPK3, MAPK8, MAPKAPK2, M…
55	Sustaining Proliferative Signaling	ARMS Mediated Activation	reactome	BRAF, CRK, KIDINS220, NGF, NTRK1, RAP1A, YWHAB
219	Sustaining Proliferative Signaling	BCR	reactome	AKT1, ATF2, ATP2B4, BANK1, BAX, BCAR1, BCL10, BCL2, BCL2L11, BCL6, BLK, BLNK, BRAF, BTK, BTLA, CARD11, CASP3, CASP7, CASP9, CBL, CBLB, CCL3, CCL4, CCNA2, CCND2, CCND3, CCNE1, CD19, CD22, CD5, CD72, CD79A, CD79B, CD81, CDK2, CDK4, CDK6, CDK7, CHST15, CHUK, CMTM3, CR2, CREB1, CRK, CRKL, CSK, CTNNB1, CYCS, DAPP1, DBNL, DNM2, DOK1, DOK3, EIF4EBP1, ELK1, FCGR2B, FOS, FOSB, FOXO1, FOXO3, FYN, GAB1, GAB…
264	Sustaining Proliferative Signaling	C MYC Pathway	reactome	ACTL6A, AXIN1, CDKN2A, FBXW7, GSK3B, HBP1, KAT2A, KAT5, MAX, MYC, PAK2, PIN1, PML, PPP2CA, PPP2R5A, RUVBL1, RUVBL2, SKP2, SUPT3H, SUPT7L, TAF10, TAF12, TAF9, TRRAP, ZBTB17
271	Sustaining Proliferative Signaling	CD28 Dependent PI3K/Akt Signaling	reactome	AKT1, AKT2, AKT3, CD28, CD80, CD86, FYN, LCK, MAP3K14, MAP3K8, MAPKAP1, MLST8, MTOR, PDPK1, PIK3CA, PIK3R1, PIK3R2, PIK3R3, PRR5, RICTOR, THEM4, TRIB3
276	Sustaining Proliferative Signaling	CDC42 Signaling Events	inoh	ACTR2, ACTR3, APC, ARHGDIA, ARHGEF6, ARHGEF7, ARPC1B, ARPC2, ARPC3, ARPC4, ARPC5, ATF2, BAIAP2, BCAR1, BRAF, CBL, CDC42, CDC42BPA, CDH1, CFL1, CTNNA1, CTNNB1, DIAPH3, DLG1, ENAH, EPS8, EXOC7, F2RL2, GSK3B, HES5, HRAS, IQGAP1, IQGAP3, JUN, LIMK1, LIMK2, MAP2K3, MAP2K4, MAP2K6, MAP2K7, MAP3K1, MAP3K11, MAPK1, MAPK14, MAPK3, MAPK8, MAPK9, MTOR, MYL2, PAK1, PAK2, PAK4, PARD6A, PAX6, PIK3CA, PIK3R1, P…
330	Sustaining Proliferative Signaling	Cell Cycle	reactome	CCND2, CCND3, CCNE1, CCNE2, CINP, PSMD11, PSMD12, PSMD13, PSMD14, PSMD3, PSMD4, PSMD7, PSME3, RPA3
1775	Sustaining Proliferative Signaling	Cell Division	humancyc	KIF20A, KIF23, NUDC, PLK1
353	Sustaining Proliferative Signaling	Class I PI3K Signaling Events	reactome	ADAP1, AKT1, ARAP3, ARF1, ARF5, ARF6, BLK, BLNK, BTK, CYTH1, CYTH2, CYTH3, DAPP1, FGR, FOXO3, FYN, HCK, HRAS, HSP90AA1, INPP5D, INPPL1, ITK, KRAS, LAT, LCK, LYN, NRAS, PDPK1, PIK3CA, PIK3CB, PIK3CG, PIK3R1, PIK3R6, PLCG1, PLCG2, PLEKHA1, PLEKHA2, PTEN, RAC1, RAP1A, RHOA, SGK1, SRC, SYK, YES1, ZAP70
354	Sustaining Proliferative Signaling	Class I PI3K Signaling Events Mediated By Akt	reactome	AKT1, AKT2, AKT3, BAD, BCL2L1, CASP9, CDKN1A, CDKN1B, CHUK, FOXO1, FOXO3, FOXO4, GSK3A, GSK3B, HSP90AA1, KPNA1, MAP3K5, MAPKAP1, MLST8, MTOR, PDPK1, PRKACA, PRKDC, RAF1, RICTOR, SFN, SLC2A4, SRC, TBC1D4, YWHAB, YWHAE, YWHAG, YWHAH, YWHAQ, YWHAZ
355	Sustaining Proliferative Signaling	Class IB PI3K Non Lipid Kinase Events	pid	MAP2K1, MAPK1, PDE3B, PIK3CG, PIK3R6
378	Sustaining Proliferative Signaling	Constitutive Signaling By Aberrant PI3K In Cancer	reactome	BTC, CD19, CD28, CD80, CD86, EGF, EGFR, ERBB2, ERBB3, ERBB4, EREG, FGF1, FGF10, FGF16, FGF17, FGF18, FGF19, FGF2, FGF20, FGF22, FGF23, FGF3, FGF4, FGF5, FGF6, FGF7, FGF8, FGF9, FGFR1, FGFR2, FGFR3, FGFR4, FRS2, FYN, GAB1, GRB2, HBEGF, IRS1, IRS2, KIT, KITLG, KL, KLB, LCK, NRG1, NRG2, NRG3, NRG4, PDGFA, PDGFB, PDGFRA, PDGFRB, PIK3CA, PIK3CB, PIK3CD, PIK3R1, PIK3R2, PIK3R3, PTPN11, TRAT1, VAV1
377	Sustaining Proliferative Signaling	Constitutive Signaling By AKT1 E17K In Cancer	reactome	AKT1, AKT1S1, AKT2, AKT3, BAD, CASP9, CDKN1A, CDKN1B, CHUK, CREB1, FOXO1, FOXO3, FOXO4, GSK3A, GSK3B, MAPKAP1, MDM2, MLST8, MTOR, NR4A1, PDPK1, PRR5, RICTOR, RPS6KB2, TSC2
379	Sustaining Proliferative Signaling	Constitutive Signaling By EGFRvIII	reactome	CBL, CDC37, EGF, EGFR, GAB1, GRB2, HRAS, HSP90AA1, KRAS, NRAS, PIK3CA, PIK3R1, PLCG1, SHC1, SOS1
380	Sustaining Proliferative Signaling	Constitutive Signaling By Ligand Responsive EGFR Cancer Variants	reactome	CBL, CDC37, EGF, EGFR, GAB1, GRB2, HRAS, HSP90AA1, KRAS, NRAS, PIK3CA, PIK3R1, PLCG1, RPS27A, SHC1, SOS1, UBA52, UBB, UBC
293	Sustaining Proliferative Signaling	CREB Phosphorylation Through The Activation Of Ras	reactome	BRAF, CAMK2A, CAMK2B, CAMK2D, CAMK2G, CREB1, MAPK1, RAF1, RPS6KA1, RPS6KA2, RPS6KA3, RPS6KA6, RRAS
394	Sustaining Proliferative Signaling	Cyclin A:Cdk2 Associated Events At S Phase Entry	reactome	CCNA1, CCNA2, CCNH, CDC25A, CDC25B, CDK2, CDK7, CDKN1A, CDKN1B, FZR1, MAX, MNAT1, MYC, RB1, WEE1
476	Sustaining Proliferative Signaling	Downstream Signaling In NaÃ¯ve CD8+ T Cells	reactome	B2M, BRAF, CALM1, CALM2, CALM3, CD247, CD3D, CD3E, CD3G, CD8A, CD8B, EGR1, EGR4, ELK1, EOMES, FASLG, FOS, FOSL1, GZMB, HLA-A, HRAS, IFNA1, IFNA10, IFNA13, IFNA14, IFNA16, IFNA17, IFNA2, IFNA21, IFNA4, IFNA5, IFNA6, IFNA7, IFNA8, IFNAR1, IFNAR2, IFNG, IL2, IL2RA, IL2RB, IL2RG, JUN, JUNB, KRAS, MAP2K1, MAP2K2, MAPK1, MAPK3, MAPK8, MAPK9, NFATC1, NFATC2, NFATC3, NRAS, PIK3CA, PRF1, PRKCA, PRKCB, PRK…
477	Sustaining Proliferative Signaling	Downstream Signaling Of Activated FGFR1	reactome	FGF1, FGF10, FGF17, FGF2, FGF20, FGF22, FGF23, FGF3, FGF4, FGF5, FGF6, FGF8, FGF9, FGFR1, FLRT1, FLRT2, FLRT3, KL
480	Sustaining Proliferative Signaling	Drosophila Toll Like Receptor Signaling ( Drosophila Toll Like Receptor Signaling )	reactome	ACVR1, ACVR1B, ACVR2A, ACVR2B, ACVRL1, ADAM10, ADAM17, ADRBK1, ADRBK2, AKT1, AKT2, AKT3, ALK, AMHR2, APH1A, APH1B, ARAF, BMP1, BMPR1A, BMPR1B, BMPR2, BRAF, BTK, CAMK2A, CAMK2B, CAMK2D, CAMK2G, CASP1, CASP10, CASP14, CASP2, CASP3, CASP4, CASP5, CASP6, CASP7, CASP8, CASP9, CCNH, CDC7, CDK1, CDK2, CDK3, CDK4, CDK5, CDK6, CDK7, CDK8, CDK9, CHUK, CNDP1, CSK, CSNK1A1, CSNK1D, CSNK1E, CSNK1G1, CSNK1G2, …
493	Sustaining Proliferative Signaling	EGF Signaling Pathway ( EGF Signaling Pathway Diagram )	reactome	EGF, EGFR, GRB2, HRAS, KRAS, MAP3K1, NRAS, RAF1, SHC1, SHC2, SHC3, SOS1, SOS2
494	Sustaining Proliferative Signaling	EGF Signaling Pathway (D. Melanogaster) ( EGF Signaling Pathway Diagram ) // FGF Signaling Pathway (D. Melanogaster Tracheal Cells) ( FGF Signaling Pathway (D. Melanogaster) )	reactome	SFN, YWHAB, YWHAE, YWHAG, YWHAH, YWHAQ, YWHAZ
498	Sustaining Proliferative Signaling	EGFR1	reactome	ABI1, ABL1, ABL2, ACP1, ACTA2, ACTB, ACTN1, ACTN4, ACTR2, ACTR3, ADAM17, ADAM9, ADRBK1, AFAP1L2, AHCYL1, AHNAK, AKT1, ALB, ALDOA, ANKS1A, ANTXR1, ANXA1, ANXA2, ANXA4, AP2A1, AP2B1, AP2S1, APLP2, APP, APPL1, APPL2, ARAF, ARAP1, ARF4, ARHGAP32, ARHGAP35, ARHGAP42, ARHGAP5, ARHGEF4, ARHGEF5, ARHGEF7, ASAP1, ASAP3, ATF1, ATP1A1, ATP5C1, ATXN2, AXL, BAD, BAIAP2, BAIAP2L1, BCAR1, BCAR3, BCL2, BRAF, C11…
532	Sustaining Proliferative Signaling	Energy Dependent Regulation Of MTOR By LKB1 AMPK	reactome	CAB39, CAB39L, LAMTOR1, LAMTOR2, LAMTOR3, LAMTOR4, LAMTOR5, MLST8, MTOR, PPM1A, PRKAA1, PRKAA2, PRKAB1, PRKAB2, PRKAG1, PRKAG2, PRKAG3, RHEB, RPTOR, RRAGA, RRAGB, RRAGC, RRAGD, STK11, STRADA, STRADB, TSC1, TSC2
540	Sustaining Proliferative Signaling	ErbB Receptor Signaling Network	pid	AREG, BTC, EGF, EGFR, ERBB2, ERBB3, ERBB4, EREG, HBEGF, HSP90AA1, NRG1, NRG2, NRG3, NRG4, TGFA
539	Sustaining Proliferative Signaling	ErbB Signaling Pathway	pid	BCL2L11, CDKN1B, MAP2K7, MTOR, MYC, PAK4, PDK1, RPS6KB1, TP53
541	Sustaining Proliferative Signaling	ErbB1 Downstream Signaling	mirtarbase	ABI1, ACTR2, ACTR3, AKT1, ARF4, ARPC1B, ARPC2, ARPC3, ARPC4, ARPC5, ATF1, ATF2, BAD, BAIAP2, BCL2L1, BRAF, BRK1, CALM1, CALM2, CALM3, CAPN2, CDC42, CHN2, CREB1, CYFIP2, DIAPH3, DUSP1, DUSP6, EGF, EGFR, EGR1, ELK1, EPS8, F2RL2, FOS, GAB1, GRB2, HRAS, IQGAP1, JUN, KRAS, KSR1, MAP2K1, MAP2K2, MAP2K4, MAP2K5, MAP3K1, MAP3K2, MAPK1, MAPK3, MAPK7, MAPK8, MAPK9, MAPKAP1, MEF2C, MLST8, MTOR, MYLPF, NCKAP…
510	Sustaining Proliferative Signaling	ERBB2 Activates PTK6 Signaling // Signaling By ERBB4	inoh	BTC, EGF, EGFR, ERBB2, ERBB3, ERBB4, EREG, HBEGF, NRG1, NRG2, NRG3, NRG4, PTK6
511	Sustaining Proliferative Signaling	ERBB2 Regulates Cell Motility	reactome	BTC, DIAPH1, EGF, EGFR, ERBB2, ERBB3, ERBB4, EREG, HBEGF, MEMO1, NRG1, NRG2, NRG3, NRG4, RHOA
542	Sustaining Proliferative Signaling	ErbB2/ErbB3 Signaling Events	wikipathways	AKT1, BAD, CDC42, CHRNA1, CHRNE, DOCK7, ERBB2, ERBB3, FOS, GRB2, HRAS, JAK2, JUN, KRAS, MAP2K1, MAP2K2, MAPK1, MAPK10, MAPK3, MAPK8, MAPK9, MTOR, NF2, NFATC4, NRAS, NRG1, NRG2, PIK3CA, PIK3CB, PIK3R1, PPP3CB, PRKACA, PTPN11, RAC1, RAF1, RNF41, SHC1, SOS1, SRC, STAT3, USP8
543	Sustaining Proliferative Signaling	ErbB4 Signaling Events	pid	ADAM17, BTC, CBFA2T3, DLG4, ERBB2, ERBB4, EREG, FYN, GRB2, GRIN2B, HBEGF, ITCH, JAK2, LRIG1, MAPK1, MAPK3, MDM2, NCOR1, NEDD4, NRG1, NRG2, NRG3, NRG4, PIK3CA, PIK3CB, PIK3R1, PRL, PRLR, SHC1, STAT5A, STAT5B, TAB2, WWOX, WWP1, YAP1
512	Sustaining Proliferative Signaling	ERK Cascade ( B Cell Receptor Signaling ) // ERK Cascade ( CD4 T Cell Receptor Signaling ) // ERK Cascade ( FGF Signaling Pathway ) // ERK Cascade ( GPCR Adenosine A2A Receptor Signaling Pathway ) // ERK Cascade ( GPCR GroupI Metabotropic Glutamate Receptor Signaling Pathway ) // ERK Cascade ( GPCR Signaling (G Alpha Q) ) // ERK Cascade ( GPCR Signaling (G Alpha S, Epac And ERK) ) // ERK Cascade …	reactome	ARAF, BRAF, ELK1, MAP2K1, MAP2K2, MAPK1, MAPK3, RAF1
513	Sustaining Proliferative Signaling	ERK Cascade ( CD4 T Cell Receptor Signaling (ERK Cascade) )	reactome	ARAF, BRAF, MAP2K1, MAP2K2, MAPK1, MAPK10, MAPK3, MAPK8, MAPK9, RAF1
514	Sustaining Proliferative Signaling	ERK Cascade ( EGF Signaling Pathway Diagram ) // ERK Cascade ( HGF Signaling Pathway ) // ERK Cascade ( PDGF Signaling Pathway ) // ERK Cascade ( VEGF Signaling Pathway )	reactome	ELK1, MAP2K1, MAP2K2, MAPK1, MAPK3, RAF1
515	Sustaining Proliferative Signaling	ERK Cascade ( FGF8 Signaling (Mouse) ) // ERK Cascade ( FGF8 Signaling (Xenopus) )	inoh // reactome	ARAF, BRAF, ELK1, ELK3, ELK4, ERG, ETS1, ETS2, ETV5, ETV6, FLI1, MAP2K1, MAP2K2, MAPK1, MAPK3, RAF1, SPI1
516	Sustaining Proliferative Signaling	ERK/MAPK Targets	inoh	ELK1, MAPK1, MAPK11, MAPK14, MAPK3, MAPK7, MEF2A, MEF2C, PPP2CA, PPP2CB, PPP2R1A, PPP2R1B, PPP2R5D, RPS6KA1, RPS6KA2, RPS6KA3, RPS6KA5
562	Sustaining Proliferative Signaling	FCERI Mediated MAPK Activation	wikipathways	FOS, GRAP2, GRB2, HRAS, IGHE, IGHV3-23, IGKC, IGKV1-5, IGKV1D-16, IGKV4-1, IGLC1, IGLC2, IGLC3, IGLC6, IGLC7, JUN, KRAS, LAT, LCP2, LYN, MAP2K4, MAP2K7, MAP3K1, MAPK1, MAPK10, MAPK3, MAPK8, MAPK9, NRAS, PAK1, PAK2, PLCG1, PLCG2, RAC1, SHC1, SOS1, SYK, VAV1, VAV2, VAV3
565	Sustaining Proliferative Signaling	FGF Signaling Pathway	reactome	AKT1, FGF1, FGFR1, FGFR2, FGFR3, FGFR4, FRS2, MAPK1, MAPK14, MAPK3, PIK3CA, PLCG1, SHC1, SOS1, SPRY2
566	Sustaining Proliferative Signaling	FGF Signaling Pathway ( FGF Signaling Pathway )	reactome	ARAF, BRAF, FGF1, FGF10, FGF11, FGF13, FGF14, FGF16, FGF17, FGF18, FGF19, FGF2, FGF20, FGF21, FGF22, FGF23, FGF3, FGF4, FGF5, FGF6, FGF7, FGF8, FGF9, FGFR1, FGFR2, FGFR3, FGFR4, FRS2, FRS3, GAB1, GRB2, HRAS, KRAS, NRAS, PIK3CA, PIK3CB, PIK3CD, PIK3R1, PLCG1, PLCG2, PRKCD, RAF1, SOS1, SOS2
567	Sustaining Proliferative Signaling	FGF8 Signaling Pathway(Mouse) ( FGF8 Signaling (Mouse) ) // FGF8 Signaling Pathway(Xenopus) ( FGF8 Signaling (Xenopus) )	reactome	ARAF, BRAF, ELK1, ELK3, ELK4, ERG, ETS1, ETS2, ETV5, ETV6, FLI1, FRS2, FRS3, HRAS, KRAS, NRAS, RAF1, SOS1, SOS2, SPI1
568	Sustaining Proliferative Signaling	FGFR1b Ligand Binding And Activation	panther // pid	FGF1, FGF10, FGF2, FGF22, FGF3, FGFR1
569	Sustaining Proliferative Signaling	FGFR1c Ligand Binding And Activation // Signaling By Activated Point Mutants Of FGFR1	inoh	ANOS1, FGF1, FGF17, FGF2, FGF20, FGF23, FGF4, FGF5, FGF6, FGF8, FGF9, FGFR1
570	Sustaining Proliferative Signaling	FGFR2 Alternative Splicing	inoh	ESRP1, ESRP2, FGFR2, GTF2F1, GTF2F2, HNRNPA1, HNRNPF, HNRNPH1, HNRNPM, NCBP1, NCBP2, POLR2A, POLR2B, POLR2C, POLR2D, POLR2E, POLR2F, POLR2G, POLR2H, POLR2I, POLR2J, POLR2K, POLR2L, PTBP1, RBFOX2, TIA1, TIAL1
571	Sustaining Proliferative Signaling	FGFR2b Ligand Binding And Activation	reactome	FGF1, FGF10, FGF2, FGF22, FGF3, FGF7, FGFBP1, FGFBP2, FGFBP3, FGFR2
572	Sustaining Proliferative Signaling	FGFR2c Ligand Binding And Activation	reactome	FGF1, FGF16, FGF17, FGF18, FGF2, FGF20, FGF23, FGF4, FGF5, FGF6, FGF8, FGF9, FGFR2
573	Sustaining Proliferative Signaling	FGFR3 Mutant Receptor Activation // FGFR3c Ligand Binding And Activation // Phospholipase C Mediated Cascade; FGFR3 // Signaling By Activated Point Mutants Of FGFR3	reactome	FGF1, FGF16, FGF17, FGF18, FGF2, FGF20, FGF23, FGF4, FGF5, FGF8, FGF9, FGFR3, GALNT3, PLCG1
574	Sustaining Proliferative Signaling	FGFR3b Ligand Binding And Activation	reactome	FGF1, FGF17, FGF18, FGF20, FGF8, FGF9, FGFR3
575	Sustaining Proliferative Signaling	FGFR4 Ligand Binding And Activation // Phospholipase C Mediated Cascade; FGFR4	reactome	FGF1, FGF16, FGF17, FGF18, FGF19, FGF2, FGF20, FGF23, FGF4, FGF6, FGF8, FGF9, FGFR4, KLB, PLCG1
576	Sustaining Proliferative Signaling	FGFRL1 Modulation Of FGFR1 Signaling	reactome	FGF10, FGF17, FGF18, FGF2, FGF22, FGF23, FGF3, FGF4, FGF5, FGF8, FGFRL1, SPRED1, SPRED2
626	Sustaining Proliferative Signaling	Frs2 Mediated Activation	smpdb	BRAF, CRKL, FRS2, NGF, NTRK1, PLCG1, RAP1A, RAPGEF1, YWHAB
642	Sustaining Proliferative Signaling	G Beta:gamma Signalling Through PI3Kgamma	inoh	AKT1, AKT2, AKT3, CSF2, CSF2RA, CSF2RB, GAB2, GNB1, GNB2, GNB3, GNB4, GNB5, GNG10, GNG11, GNG12, GNG13, GNG2, GNG3, GNG4, GNG5, GNG7, GNG8, GNGT1, GNGT2, GRB2, IL2, IL2RA, IL2RB, IL2RG, IL3, IL3RA, IL5, IL5RA, JAK1, JAK2, JAK3, PDPK1, PIK3CA, PIK3CB, PIK3CD, PIK3CG, PIK3R1, PIK3R2, PIK3R3, PIK3R5, PIK3R6, RHOA, SHC1
646	Sustaining Proliferative Signaling	G1 To S Cell Cycle Control	reactome	ATM, CDC25A, GADD45A, MYC, PCNA, TP53
675	Sustaining Proliferative Signaling	Gastrin CREB Signalling Pathway Via PKC And MAPK	reactome	CCKBR, CREB1, GAST, MAPK1, MAPK3, MAPK7, RPS6KA1, RPS6KA2, RPS6KA3
662	Sustaining Proliferative Signaling	GRB2 Events In EGFR Signaling // SHC1 Events In EGFR Signaling	pid	EGF, EGFR, GRB2, HRAS, KRAS, NRAS, SHC1, SOS1
664	Sustaining Proliferative Signaling	GRB2:SOS Provides Linkage To MAPK Signaling For Integrins	reactome	APBB1IP, FGA, FGB, FGG, FN1, GRB2, ITGA2B, ITGB3, PTK2, RAP1A, RAP1B, SOS1, SRC, TLN1, VWF
734	Sustaining Proliferative Signaling	Growth Hormone Receptor Signaling	pid	ADAM17, CISH, CSH1, GH1, GH2, GHR, IRS1, IRS2, JAK2, LYN, MAPK1, MAPK3, PRL, PRLR, PTPN1, PTPN6, SH2B1, SOCS1, SOCS2, SOCS3, STAT1, STAT3, STAT5A, STAT5B
735	Sustaining Proliferative Signaling	Growth Hormone Signaling Pathway(JAK2 STAT5) ( Growth Hormone Signaling(JAK2 STAT5) )	reactome	GH1, GHR, JAK2, PTPN11, SOCS1, SOCS2, SOCS3, STAT5A, STAT5B
766	Sustaining Proliferative Signaling	Heterotrimeric GPCR Signaling Pathway (through G Alpha I And Pertussis Toxin) ( GPCR Signaling (pertussis Toxin) ) // Heterotrimeric GPCR Signaling Pathway (through G Alpha Q, PLC Beta And ERK Cascade) ( GPCR Signaling (G Alpha Q) ) // Heterotrimeric GPCR Signaling Pathway (through G Alpha S ACs Epac BRaf And ERKcascade) ( GPCR Signaling (G Alpha S, Epac And ERK) ) // Heterotrimeric GPCR Signalin…	panther	ADCY1, ADCY10, ADCY2, ADCY3, ADCY4, ADCY5, ADCY6, ADCY7, ADCY8, ADCY9, ADORA1, ADORA2A, ADORA2B, AGT, AGTR1, AGTR2, ARAF, AREG, AVP, BDNF, BMP10, BMP15, BMP2, BMP3, BMP4, BMP5, BMP6, BMP7, BMP8B, BRAF, BTC, CALCA, CALCB, CCK, CD40LG, CD80, CD86, CGA, CGB3, CGB5, CGB7, CGB8, CRH, CSF2, CSF3, CXCL8, CXCR1, CXCR2, DBI, DHH, DLL1, DLL3, DLL4, DRD1, DRD2, DRD3, DRD4, DRD5, EDN1, EDN2, EDN3, EGF, EPO, …
767	Sustaining Proliferative Signaling	Heterotrimeric GPCR Signaling Pathway (through Glutamate, G Alpha Q And PLC Beta) ( GPCR GroupI Metabotropic Glutamate Receptor Signaling Pathway )	inoh	ARAF, BRAF, GNAQ, GNB3, GNB5, GNGT2, GRM1, GRM5, PRKCA, PRKCB, PRKCD, PRKCE, PRKCG, PRKCH, PRKCI, PRKCQ, PRKCZ, RAF1
796	Sustaining Proliferative Signaling	IGF1 Signaling Pathway ( IGF1 Signaling Pathway )	inoh	ARAF, BRAF, GRB2, HRAS, IGF1, IGF1R, IGFBP1, IGFBP2, IGFBP3, IGFBP4, IGFBP5, IGFBP6, IRS1, KLK3, KRAS, NRAS, PIK3CA, PIK3CB, PIK3CD, PIK3R1, PIK3R2, RAF1, SHC1, SHC2, SHC3, SOS1, SOS2
825	Sustaining Proliferative Signaling	IL2 Signaling Events Mediated By PI3K	pid	AKT1, BCL2, BCL2L1, CALM1, CALM2, CALM3, E2F1, EIF3A, FOXO3, GAB2, GRB2, HSP90AA1, IL2, IL2RA, IL2RB, IL2RG, JAK1, JAK3, LCK, MTOR, MYB, MYC, NFATC2, NFKB1, PIK3CA, PIK3R1, PRKCZ, PTPN11, RAC1, RELA, RPS6, RPS6KB1, SGMS1, SHC1, SMPD1, SOS1, TERT, UGCG
871	Sustaining Proliferative Signaling	Insulin Receptor Signaling ( Insulin Receptor Signaling (D. Melanogaster) ) // Insulin Receptor Signaling (Mammal) ( Insulin Receptor Signaling (Mammal) )	smpdb	AKT1, AKT1S1, AKT2, AKT3, ARAF, BRAF, EIF4E, EIF4EBP1, FKBP1A, FKBP8, GRB2, GSK3B, HRAS, INS, INSR, IRS1, IRS2, IRS4, KRAS, MLST8, MTOR, NRAS, PIK3CA, PIK3CB, PIK3CD, PIK3R1, PIK3R2, PPP2R1A, PPP2R1B, PPP2R2B, PPP2R2C, PPP2R3A, PPP2R3B, PPP2R4, PPP2R5A, PPP2R5B, PPP2R5C, PPP2R5D, PPP2R5E, PRKAA1, PRKAA2, PRKAB1, PRKAB2, PRKAG1, PRKAG2, PRKAG3, RAF1, RPTOR, SFN, SHC1, SHC2, SHC3, SLC2A4, SOS1, SOS…
875	Sustaining Proliferative Signaling	Insulin/IGF Pathway Mitogen Activated Protein Kinase Kinase/MAP Kinase Cascade	reactome	ELK1, FOS, IGF1, IGF1R, IGF2, IGF2R, INS, INSR, INSRR, IRS1, IRS2, IRS4, MAP2K1, MAP2K2, MAP2K3, MAPK1, MAPK3, RAF1, RASA1, RPS6KA1, RPS6KA2, RPS6KA3, RPS6KA4, RPS6KA5, RPS6KA6, RPS6KB1, RPS6KB2, SOS1, SOS2
877	Sustaining Proliferative Signaling	Integrated Breast Cancer Pathway	pid	AKT1, ALKBH1, APOBEC3G, AQP7P3, AR, ARAF, ATF1, ATM, ATR, BACH1, BAD, BAK1, BARD1, BCL2, BID, BLM, BMPR2, BRAF, BRCA1, CCNB1IP1, CCND1, CDC25A, CDC25B, CDK2, CDK4, CERK, CHEK1, CHEK2, CHUK, CTNNB1, DCAKD, E2F1, EDAR, EGFR, FAU, FER, FILIP1, FOSL2, GSK3A, HDAC1, HIPK2, JAK1, JAKMIP1, LGALS13, MAP3K7CL, MAX, MDM2, MMP1, MSH2, MYC, MYT1, NAB1, NF1, NFKB1, NOXA1, ODC1, PAK1, PIAS1, PIK3R2, PKIA, PLK1…
885	Sustaining Proliferative Signaling	Integrin Signaling Pathway ( Integrin Signaling Pathway )	reactome	ACAN, ACTB, AGRN, ARHGEF6, BCAN, BCAR1, BGN, BRAF, CAV1, CD44, CDC42, COL10A1, COL11A1, COL11A2, COL12A1, COL15A1, COL16A1, COL18A1, COL19A1, COL1A1, COL1A2, COL2A1, COL3A1, COL4A1, COL4A2, COL4A3, COL4A4, COL4A5, COL4A6, COL5A1, COL5A2, COL6A1, COL6A2, COL7A1, COL8A1, COL8A2, COL9A1, COL9A2, COL9A3, CRK, DCN, DOCK1, DOCK10, DOCK2, DOCK3, DOCK4, DOCK5, DOCK6, DOCK7, DOCK8, DOCK9, ELN, FN1, FYN, G…
886	Sustaining Proliferative Signaling	Integrin Signalling Pathway	reactome	ACTB, ACTBL2, ACTG1, ACTN1, ACTN2, ACTN4, ARAF, ARF1, ARF6, ARHGAP10, ARHGAP26, ARL1, ARPC1A, ARPC1B, ARPC2, ARPC3, ARPC5, ARPC5L, ASAP1, BCAR1, BRAF, CAV1, CDC42, COL10A1, COL11A1, COL11A2, COL12A1, COL13A1, COL14A1, COL15A1, COL16A1, COL17A1, COL1A1, COL1A2, COL20A1, COL27A1, COL2A1, COL3A1, COL4A1, COL4A2, COL4A3, COL4A4, COL4A5, COL4A6, COL5A1, COL5A2, COL5A3, COL6A1, COL6A2, COL6A3, COL8A1, …
895	Sustaining Proliferative Signaling	Interleukin Signaling Pathway	reactome	AKT1, AKT2, AKT3, ARAF, BRAF, CDKN1A, CDKN1B, CHUK, CXCL8, CXCR1, CXCR2, ELK1, ELK3, ELK4, FOS, FOXO3, GSK3B, IKBKB, IL10, IL10RA, IL10RB, IL11, IL11RA, IL12RB1, IL12RB2, IL13, IL13RA1, IL13RA2, IL15, IL15RA, IL17A, IL17F, IL18, IL1A, IL2, IL20RA, IL21, IL23A, IL2RA, IL2RB, IL4, IL4R, IL5, IL5RA, IL6, IL6R, IL6ST, IL7, IL9, IRS1, IRS2, JAK3, MAPK1, MAPK15, MAPK3, MAPK6, MAPK7, MAPKAPK2, MKNK1, MK…
907	Sustaining Proliferative Signaling	Intracellular Signalling Through Adenosine Receptor A2a And Adenosine // Intracellular Signalling Through Adenosine Receptor A2b And Adenosine	reactome	ADCY2, ADORA2A, ADORA2B, AKT1, ARHGEF7, ATF2, BAD, BRAF, CDC42, CHUK, CREB1, ELK1, GNAS, GNB1, GNGT1, HRAS, IKBKB, JUN, MAP2K2, MAP2K6, MAP2K7, MAP3K1, MAP3K4, MAPK1, MAPK11, MAPK8, NFKB1, NFKB2, NFKBIA, PAK1, PARD6A, PDPK1, PIK3CA, PRKACB, PRKCZ, RAP1A, RAPGEF2, RAPGEF3, RPS6KA1
922	Sustaining Proliferative Signaling	JAK/STAT Signaling Pathway	reactome	JAK1, JAK2, JAK3, PIAS1, PIAS2, PIAS3, PTPRC, SOCS1, SPDYE7P, STAT1, STAT3, STAT4, STAT5A, STAT5B, STAT6
925	Sustaining Proliferative Signaling	JNK Cascade ( EGF Signaling Pathway Diagram ) // JNK Cascade ( PDGF Signaling Pathway )	panther	JUN, MAP2K4, MAP3K1, MAPK8
974	Sustaining Proliferative Signaling	MAP2K And MAPK Activation	reactome	APBB1IP, ARAF, ARRB1, ARRB2, BRAF, CNKSR1, CNKSR2, CSK, FGA, FGB, FGG, FN1, HRAS, IL17RD, IQGAP1, ITGA2B, ITGB3, KRAS, KSR1, KSR2, LAMTOR2, LAMTOR3, MAP2K1, MAP2K2, MAPK1, MAPK3, MARK3, NRAS, PEBP1, RAF1, RAP1A, RAP1B, SRC, TLN1, VCL, VWF, WDR83, YWHAB
975	Sustaining Proliferative Signaling	MAP3K8 (TPL2) Dependent MAPK1/3 Activation	reactome	BTRC, CHUK, CUL1, FBXW11, IKBKB, IKBKG, MAP2K1, MAP2K4, MAP3K8, NFKB1, RPS27A, SKP1, TNIP2, UBA52, UBB, UBC
976	Sustaining Proliferative Signaling	MAPK1 (ERK2) Activation	reactome	IL6, IL6R, IL6ST, JAK1, JAK2, MAP2K2, MAPK1, PTPN11, TYK2
977	Sustaining Proliferative Signaling	MAPK3 (ERK1) Activation	reactome	CDK1, IL6, IL6R, IL6ST, JAK1, JAK2, MAP2K1, MAPK3, PTPN11, TYK2
978	Sustaining Proliferative Signaling	MAPK6/MAPK4 Signaling	reactome	AGO1, AGO2, AGO3, AGO4, CCND3, CDC14A, CDC14B, CDC42, CDC42EP2, CDC42EP3, CDC42EP5, CDK1, DNAJB1, ETV4, FOXO1, FOXO3, HSPB1, IGF2BP1, JUN, KALRN, MAPK4, MAPK6, MAPKAPK5, MMP10, MMP2, MOV10, MYC, NCOA3, PAK1, PAK2, PAK3, PRKACA, PRKACB, PRKACG, PSMA1, PSMA2, PSMA3, PSMA4, PSMA5, PSMA6, PSMA7, PSMA8, PSMB1, PSMB10, PSMB11, PSMB2, PSMB3, PSMB4, PSMB5, PSMB6, PSMB7, PSMB8, PSMB9, PSMC1, PSMC2, PSMC3,…
1818	Sustaining Proliferative Signaling	MTOR Signaling Pathway	humancyc	AKT1, AKT1S1, ATG13, BNIP3, BRAF, BTRC, CCNE1, CDK2, CLIP1, CYCS, DDIT4, DEPTOR, EEF2, EEF2K, EIF4A1, EIF4B, EIF4E, EIF4EBP1, FBXW11, HRAS, IKBKB, IRS1, KRAS, MAP2K1, MAP2K2, MAPK1, MAPK3, MAPKAP1, MLST8, MTOR, NRAS, PDCD4, PDPK1, PLD1, PLD2, PML, POLDIP3, PPARGC1A, PRKCA, PRR5, RAF1, RB1CC1, RHEB, RICTOR, RPS6KA1, RPS6KB1, RPTOR, RRAGA, RRAGB, RRAGC, RRAGD, RRN3, SFN, SGK1, SREBF1, TSC1, TSC2, U…
1819	Sustaining Proliferative Signaling	MTOR Signalling	humancyc	AKT1, AKT1S1, LAMTOR1, LAMTOR2, LAMTOR3, LAMTOR4, LAMTOR5, MLST8, MTOR, RHEB, RPTOR, RRAGA, RRAGB, RRAGC, RRAGD, YWHAB
1820	Sustaining Proliferative Signaling	MTORC1 Mediated Signalling	humancyc	AKT1S1, EEF2K, EIF4B, EIF4E, EIF4EBP1, EIF4G1, LAMTOR1, LAMTOR2, LAMTOR3, LAMTOR4, LAMTOR5, MLST8, MTOR, RHEB, RPS6, RPS6KB1, RPTOR, RRAGA, RRAGB, RRAGC, RRAGD, YWHAB
1035	Sustaining Proliferative Signaling	MyD88 Dependent Cascade Initiated On Endosome // TRAF6 Mediated Induction Of NFkB And MAP Kinases Upon TLR7/8 Or 9 Activation	reactome	ECSIT, IRAK1, IRAK2, IRAK4, MAP3K1, MYD88, TLR7, TLR8, TLR9, TRAF6
1090	Sustaining Proliferative Signaling	Negative Regulation Of MAPK Pathway	inoh	ARAF, BRAF, BRAP, DUSP1, DUSP10, DUSP16, DUSP2, DUSP4, DUSP5, DUSP6, DUSP7, DUSP8, DUSP9, HRAS, KRAS, KSR1, MAPK1, MAPK3, MARK3, NRAS, PAQR3, PEBP1, PPP2CA, PPP2CB, PPP2R1A, PPP2R1B, PPP2R5A, PPP2R5B, PPP2R5C, PPP2R5D, PPP2R5E, PPP5C, RAF1, RPS27A, UBA52, UBB, UBC, YWHAB
1094	Sustaining Proliferative Signaling	Negative Regulation Of The PI3K/AKT Network	reactome	AKT1, AKT2, AKT3, PHLPP1, PHLPP2, PTEN, THEM4, TRIB3
1062	Sustaining Proliferative Signaling	NGF Signaling Pathway ( NGF Signaling Pathway )	reactome	ARAF, BRAF, GRB2, HRAS, KRAS, NGF, NRAS, NTRK1, PLCG1, PRKCD, RAF1, SHC1, SHC2, SHC3, SOS1, SOS2
1832	Sustaining Proliferative Signaling	P130Cas Linkage To MAPK Signaling For Integrins	humancyc	APBB1IP, BCAR1, CRK, FGA, FGB, FGG, FN1, ITGA2B, ITGB3, PTK2, RAP1A, RAP1B, SRC, TLN1, VWF
1833	Sustaining Proliferative Signaling	P38 MAPK Pathway	wikipathways	DUSP10, EEF2K, EIF4E, ELK1, GADD45A, HSPB1, IL1R1, MAP2K4, MAP2K6, MAP3K10, MAP3K4, MAP3K5, MAP3K7, MAPK11, MAPK12, MAPK13, MAPK14, MAPKAPK2, MAPKAPK3, MEF2B, MEF2C, MEF2D, MKNK1, MKNK2, RPS6KA4, RPS6KA5, SPPL2B, SRF, TAB1, TAB2, TRAF6
1837	Sustaining Proliferative Signaling	P38 Signaling Mediated By MAPKAP Kinases	humancyc	CDC25B, CREB1, ETV1, HSPB1, LSP1, MAPK11, MAPK14, MAPKAPK2, MAPKAPK3, RAF1, SFN, SRF, TCF3, TH, TSC2, YWHAB, YWHAE, YWHAG, YWHAH, YWHAQ, YWHAZ
1838	Sustaining Proliferative Signaling	P38MAPK Events	humancyc	HRAS, KRAS, MAPK11, MAPK12, MAPK13, MAPK14, MAPKAPK2, MAPKAPK3, NRAS, RALA, RALB, RALGDS, SRC
1845	Sustaining Proliferative Signaling	P75NTR Negatively Regulates Cell Cycle Via SC1	inoh	HDAC1, HDAC2, HDAC3, NGF, NGFR, PRDM4
1161	Sustaining Proliferative Signaling	PDGF Signaling Pathway	reactome	AKT2, ARAF, ARHGAP1, ARHGAP10, ARHGAP12, ARHGAP15, ARHGAP26, ARHGAP4, ARHGAP42, ARHGAP5, ARHGAP6, ARHGAP8, ARHGAP9, BRAF, CHUK, EHF, ELF1, ELF2, ELF3, ELF4, ELF5, ELK1, ELK4, ERF, ERG, ETS1, ETV3, FEV, FLI1, FOS, GABPA, GSK3A, GSK3B, HRAS, IKBKB, ITPR1, ITPR2, ITPR3, JAK1, JAK2, JAK3, JUN, MAP2K1, MAP2K2, MAPK1, MAPK15, MAPK3, MAPK6, MAPK7, MAPK8, MAPKAPK2, MKNK1, MKNK2, MYC, MYCBP, NCK1, NCK2, N…
1165	Sustaining Proliferative Signaling	PDGFR Beta Signaling Pathway	pid	ABI1, ABL1, ACTA2, ACTN4, ACTR2, ACTR3, ARAP1, ARHGAP35, ARHGDIA, ARPC1B, ARPC2, ARPC3, ARPC4, ARPC5, BAIAP2, BCAR1, BLK, BRAF, BRK1, CBL, CRK, CSK, CTTN, CYFIP2, DNM2, DOCK4, DOK1, EIF2AK2, ELK1, EPS8, FGR, FOS, FYN, GAB1, GRB10, GRB2, HCK, HRAS, IQGAP1, ITGAV, ITGB3, JAK2, JUN, JUND, KRAS, KSR1, LCK, LRP1, LYN, MAP2K1, MAP2K2, MAP2K4, MAP2K7, MAPK1, MAPK10, MAPK3, MAPK8, MAPK9, MLLT4, MYC, MYOC…
1232	Sustaining Proliferative Signaling	Phosphorylation Of Proteins Involved In G1/S Transition By Active Cyclin E:Cdk2 Complexes	inoh	CCNE1, CCNE2, CDK2, RB1
1172	Sustaining Proliferative Signaling	PI3 Kinase Pathway	reactome	AKT1, AKT2, AKT3, CASP9, FOXO1, FOXO3, FOXO4, GNA11, GNA14, GNAQ, GNB1, GNB2, GNB3, GNB4, GNB5, GNGT1, GNGT2, GSK3B, INPPL1, INSR, IRS1, JAK2, NOS3, NRAS, PDPK1, PIK3CA, PIK3CB, PIK3R1, PIK3R2, PIK3R3, PIK3R5, PTEN, PTGER1, RPS6KB1, RPS6KB2, SOS1, SOS2, YWHAZ
1173	Sustaining Proliferative Signaling	PI3K Cascade	reactome	FGF1, FGF10, FGF16, FGF17, FGF18, FGF19, FGF2, FGF20, FGF22, FGF23, FGF3, FGF4, FGF5, FGF6, FGF7, FGF8, FGF9, FGFR1, FGFR2, FGFR3, FGFR4, FRS2, GAB1, GRB2, IRS1, IRS2, KL, KLB, PIK3C3, PIK3CA, PIK3CB, PIK3R1, PIK3R2, PIK3R4, PTPN11, TLR9
1174	Sustaining Proliferative Signaling	PI3K Events In ERBB2 Signaling	reactome	BTC, EGF, EGFR, ERBB2, ERBB3, ERBB4, EREG, GAB1, GRB2, HBEGF, NRG1, NRG2, NRG3, NRG4, PIK3CA, PIK3R1
1175	Sustaining Proliferative Signaling	PI3K Events In ERBB4 Signaling	reactome	BTC, ERBB4, EREG, HBEGF, NRG1, NRG2, NRG3, NRG4, PIK3CA, PIK3R1
1176	Sustaining Proliferative Signaling	PI3K/AKT Activation	reactome	IRS1, IRS2, NGF, NTRK1, PIK3CA, PIK3CB, PIK3R1, PIK3R2, RHOA
1177	Sustaining Proliferative Signaling	PI5P, PP2A And IER3 Regulate PI3K/AKT Signaling	panther	AKT1, BTC, CD19, CD28, CD80, CD86, EGF, EGFR, ERBB2, ERBB3, ERBB4, EREG, FGF1, FGF10, FGF16, FGF17, FGF18, FGF19, FGF2, FGF20, FGF22, FGF23, FGF3, FGF4, FGF5, FGF6, FGF7, FGF8, FGF9, FGFR1, FGFR2, FGFR3, FGFR4, FRS2, FYN, GAB1, GRB2, HBEGF, IER3, INS, INSR, IRS1, IRS2, KIT, KITLG, KL, KLB, LCK, MAPK1, MAPK3, NRG1, NRG2, NRG3, NRG4, PDGFA, PDGFB, PDGFRA, PDGFRB, PIK3CA, PIK3CB, PIK3CD, PIK3R1, PIK…
1178	Sustaining Proliferative Signaling	PIP3 Activates AKT Signaling	reactome	AGO1, AGO2, AGO3, AGO4, AKT1, AKT2, AKT3, BTC, CD19, CD28, CD80, CD86, EGF, EGFR, ERBB2, ERBB3, ERBB4, EREG, FGF1, FGF10, FGF16, FGF17, FGF18, FGF19, FGF2, FGF20, FGF22, FGF23, FGF3, FGF4, FGF5, FGF6, FGF7, FGF8, FGF9, FGFR1, FGFR2, FGFR3, FGFR4, FRS2, FYN, GAB1, GRB2, HBEGF, IRS1, IRS2, KIT, KITLG, KL, KLB, LCK, MAPKAP1, MLST8, MOV10, MTOR, NRG1, NRG2, NRG3, NRG4, PDGFA, PDGFB, PDGFRA, PDGFRB, P…
1247	Sustaining Proliferative Signaling	Polo Like Kinase Signaling Events In The Cell Cycle	reactome	PLK1, PLK2, PLK3, PLK4
1263	Sustaining Proliferative Signaling	Prolactin	pid	AGAP2, AKT1, BRAF, BTRC, CAMLG, CBL, CCND1, CD3E, CENPJ, CISH, CREBBP, CTSD, DNM2, EGFR, EIF4EBP1, ELK1, EP300, ERBB2, ERBB4, ESR1, FBXW11, FLNA, FOS, FOXO3, FYN, GAB2, GRB2, GSK3B, HLTF, HMGN2, IGBP1, IRS1, IRS2, ITGB1, JAK1, JAK2, JUN, KHDRBS1, LYN, MAP2K1, MAP2K2, MAPK1, MAPK14, MAPK3, MAPK4, MAPK7, MAPK8, MAPK9, MTOR, MYB, MYC, NCK1, NEK3, NFKB1, NFKBIA, NFKBIB, PAK1, PIAS3, PIK3CA, PIK3CB, P…
1197	Sustaining Proliferative Signaling	PTK6 Activates STAT3	reactome	PTK6, SOCS3, STAP2, STAT3
1199	Sustaining Proliferative Signaling	PTK6 Regulates Cell Cycle	reactome	CCND1, CCNE1, CDK2, CDK4, CDKN1B, PTK6
1201	Sustaining Proliferative Signaling	PTK6 Regulates RHO GTPases, RAS GTPase And MAP Kinases	reactome	ARHGAP35, BCAR1, CRK, DAB2IP, DOCK1, ELMO1, ELMO2, HRAS, KRAS, NF1, NRAS, PTK6, PXN, RAC1, RASA1, RASA2, RASA3, RASA4, RASAL1, RASAL2, RASAL3, RHOA, SPRED1, SPRED2, SPRED3, SYNGAP1
1285	Sustaining Proliferative Signaling	RAF Activation	reactome	ARAF, BRAF, BRAP, HRAS, JAK2, KRAS, KSR1, MAP2K1, MAP2K2, MAP3K11, MARK3, NRAS, PHB, PPP2CA, PPP2CB, PPP2R1A, PPP2R1B, PPP2R5A, PPP2R5B, PPP2R5C, PPP2R5D, PPP2R5E, RAF1, SRC, YWHAB
1317	Sustaining Proliferative Signaling	Raf Activation Signaling (through Grb2 And Sos) ( B Cell Receptor Signaling ) // Raf Activation Signaling (through Grb2 And Sos) ( CD4 T Cell Receptor Signaling (ERK Cascade) ) // Raf Activation Signaling (through Grb2 And Sos) ( CD4 T Cell Receptor Signaling ) // Raf Activation Signaling (through Grb2 And Sos) ( JAK STAT Pathway And Regulation Pathway Diagram )	reactome	ARAF, BRAF, GRB2, HRAS, KRAS, NRAS, RAF1, SOS1, SOS2
1318	Sustaining Proliferative Signaling	Raf Activation Signaling (through RasGRP) ( CD4 T Cell Receptor Signaling (ERK Cascade) ) // Raf Activation Signaling (through RasGRP) ( CD4 T Cell Receptor Signaling )	reactome	ARAF, BRAF, HRAS, KRAS, NRAS, PRKCQ, RAF1, RASGRP1
1286	Sustaining Proliferative Signaling	RAF Independent MAPK1/3 Activation	reactome	DUSP1, DUSP10, DUSP16, DUSP2, DUSP4, DUSP5, DUSP6, DUSP7, DUSP8, DUSP9, MAPK1, MAPK3, PEA15
1287	Sustaining Proliferative Signaling	RAF/MAP Kinase Cascade	reactome	ACTN2, AKAP9, ANGPT1, ARTN, BTC, CALM1, CALM2, CALM3, CAMK2A, CAMK2B, CAMK2D, CAMK2G, CSF2, CSF2RA, CSF2RB, DLG4, EGF, EGFR, ERBB2, ERBB3, ERBB4, EREG, FGF1, FGF10, FGF16, FGF17, FGF18, FGF19, FGF2, FGF20, FGF22, FGF23, FGF3, FGF4, FGF5, FGF6, FGF7, FGF8, FGF9, FGFR1, FGFR2, FGFR3, FGFR4, FRS2, FRS3, FYN, GDNF, GFRA1, GFRA2, GFRA3, GFRA4, GRB2, GRIN1, GRIN2A, GRIN2B, GRIN2C, GRIN2D, HBEGF, HRAS, …
1323	Sustaining Proliferative Signaling	Ras Pathway	pid	AKT1, AKT3, ARAF, ATF2, BRAF, CDC42, ELK1, ETS1, EXOC2, GSK3A, GSK3B, HRAS, JUN, KRAS, MAP2K1, MAP2K2, MAP2K3, MAP2K4, MAP2K6, MAP2K7, MAP3K1, MAP3K4, MAP3K7CL, MAPK1, MAPK10, MAPK11, MAPK12, MAPK13, MAPK14, MAPK3, MAPK8, MAPK9, MAPKAPK2, MAPKAPK3, NRAS, PAK1, PAK2, PAK3, PDPK1, PIK3C3, PIK3CA, PIK3CB, PIK3CD, PIK3CG, PLD1, PLD2, RAC1, RAC2, RAC3, RAF1, RALA, RALB, RALGDS, RGL1, RGL2, RHOA, RHOB,…
1324	Sustaining Proliferative Signaling	Ras Signaling In The CD4+ TCR Pathway	inoh	BRAF, ELK1, FOS, HRAS, KRAS, MAP2K1, MAP3K8, MAPK1, MAPK3, NRAS, PRKCA, PRKCB, PTPN7, RAF1
1350	Sustaining Proliferative Signaling	Regulation Of RAS By GAPs	reactome	CUL3, DAB2IP, HRAS, KBTBD7, KRAS, NF1, NRAS, PSMA1, PSMA2, PSMA3, PSMA4, PSMA5, PSMA6, PSMA7, PSMA8, PSMB1, PSMB10, PSMB11, PSMB2, PSMB3, PSMB4, PSMB5, PSMB6, PSMB7, PSMB8, PSMB9, PSMC1, PSMC2, PSMC3, PSMC4, PSMC5, PSMC6, PSMD1, PSMD10, PSMD11, PSMD12, PSMD13, PSMD14, PSMD2, PSMD3, PSMD4, PSMD5, PSMD6, PSMD7, PSMD8, PSMD9, PSME1, PSME2, PSME3, PSME4, PSMF1, RASA1, RASA2, RASA3, RASA4, RASAL1, RAS…
1456	Sustaining Proliferative Signaling	Signaling By EGFR	reactome	ADAM10, ADAM12, ADAM17, EGF, EGFR, LRIG1, SRC
1458	Sustaining Proliferative Signaling	Signaling By FGFR1 In Disease	reactome	BAG4, BCR, CNTRL, CPSF6, CUX1, ERLIN2, FGF1, FGF17, FGF2, FGF20, FGF23, FGF4, FGF5, FGF6, FGF8, FGF9, FGFR1, FGFR1OP, FGFR1OP2, FRS2, GAB1, GRB2, HRAS, KRAS, LRRFIP1, MYO18A, NRAS, PIK3CA, PIK3R1, PLCG1, SOS1, TRIM24, ZMYM2
1459	Sustaining Proliferative Signaling	Signaling By FGFR2 IIIa TM	reactome	FGF1, FGF2, FGFR2, GTF2F1, GTF2F2, NCBP1, NCBP2, POLR2A, POLR2B, POLR2C, POLR2D, POLR2E, POLR2F, POLR2G, POLR2H, POLR2I, POLR2J, POLR2K, POLR2L
1460	Sustaining Proliferative Signaling	Signaling By FGFR2 In Disease	reactome	FGF1, FGF10, FGF16, FGF17, FGF18, FGF2, FGF20, FGF22, FGF23, FGF3, FGF4, FGF5, FGF6, FGF7, FGF8, FGF9, FGFR2, FRS2, GAB1, GRB2, HRAS, KRAS, NRAS, PIK3CA, PIK3R1, PLCG1, SOS1
1461	Sustaining Proliferative Signaling	Signaling By FGFR3 Fusions In Cancer	reactome	FGFR3, FRS2, GAB1, GRB2, HRAS, KRAS, NRAS, PIK3CA, PIK3R1, SOS1
1462	Sustaining Proliferative Signaling	Signaling By FGFR3 Point Mutants In Cancer	reactome	FGF1, FGF16, FGF17, FGF18, FGF2, FGF20, FGF23, FGF4, FGF5, FGF8, FGF9, FGFR3, FRS2, GAB1, GRB2, HRAS, KRAS, NRAS, PIK3CA, PIK3R1, PLCG1, SOS1
1463	Sustaining Proliferative Signaling	Signaling By FGFR4 In Disease	reactome	FGFR4, FRS2, GAB1, GRB2, HRAS, KRAS, NRAS, PIK3CA, PIK3R1, PLCG1, SOS1
1485	Sustaining Proliferative Signaling	Signaling Events Mediated By Focal Adhesion Kinase	pid	ACTA1, ACTN1, ACTN2, ACTN3, ACTN4, ARHGAP26, ARHGAP35, ARHGEF11, ARHGEF28, ARHGEF7, ASAP1, BCAR1, BMX, BRAF, CAPN2, CCND1, CRK, DOCK1, ELMO1, ETS1, FYN, GIT2, GRB2, GRB7, ITGA5, ITGAV, ITGB1, ITGB5, JUN, KLF8, LCK, MAP2K1, MAP2K4, MAPK1, MAPK8, MAPK8IP3, MAPK9, MYLK, NCK1, NCK2, PAK1, PIK3CA, PIK3R1, PLCG1, PTK2, PTPN21, PXN, RAC1, RAF1, RAP1A, RAP1B, RAPGEF1, RASA1, RHOA, ROCK2, RRAS, SH3GL1, SO…
1484	Sustaining Proliferative Signaling	Signaling Events Mediated By VEGFR1 And VEGFR2	pid	AKAP1, AKT1, ARF1, BRAF, CALM1, CALM2, CALM3, CAMKK2, CAV1, CBL, CDC42, CDH5, CTNNA1, CTNNB1, DAG1, DNM2, FBXW11, FES, FLT1, FYN, GAB1, GRB10, GRB2, HGS, HSP90AA1, HSP90AB1, IQGAP1, ITGAV, ITGB3, KDR, MAP2K1, MAP2K2, MAP2K3, MAP2K6, MAPK1, MAPK11, MAPK14, MAPK3, MAPKAPK2, MYOF, NCK1, NCK2, NEDD4, NOS3, PAK2, PDPK1, PIK3CA, PIK3R1, PLCG1, PRKACA, PRKCA, PRKCB, PRKCD, PTK2, PTK2B, PTPN11, PTPN2, PT…
1496	Sustaining Proliferative Signaling	Signalling To P38 Via RIT And RIN	pid	BRAF, NGF, NTRK1, RIT1, RIT2
1510	Sustaining Proliferative Signaling	Spry Regulation Of FGF Signaling	smpdb	BRAF, CBL, GRB2, MAPK1, MAPK3, MKNK1, PPP2CA, PPP2CB, PPP2R1A, PTPN11, RPS27A, SPRY2, SRC, UBA52, UBB, UBC
1568	Sustaining Proliferative Signaling	T Cell Activation	reactome	AKT1, AKT2, AKT3, ARAF, BRAF, CD247, CD28, CD3D, CD3E, CD3G, CD80, CD86, CDC42, CHUK, CSK, FOS, HRAS, IKBKB, ITPR1, JUN, LAT, LCK, LCP2, MAP2K1, MAP2K2, MAP3K1, MAPK1, MAPK3, MAPK8, MAPK9, NCK1, NCK2, NFKBIA, NRAS, PAK1, PAK2, PAK3, PIK3C3, PIK3CA, PIK3CB, PIK3CD, PIK3CG, PIK3R1, PIK3R2, PIK3R3, PLCG1, PPP3CA, PPP3CB, PPP3CC, PRKCQ, PTPRC, RAC1, RAF1, SOS1, SOS2, VAV1, VAV2, VAV3, WAS, ZAP70
1629	Sustaining Proliferative Signaling	Tetrachlorodibenzodioxin Inhibits The Reaction [[CD40L Protein Co Treated With IL2 Protein, IL6 Protein, IL10 Protein] Affects The Activity Of MAPK1 Protein]	reactome	IL10, IL2, IL6, MAPK1
1630	Sustaining Proliferative Signaling	Tetrachlorodibenzodioxin Inhibits The Reaction [[CD40L Protein Co Treated With IL2 Protein, IL6 Protein, IL10 Protein] Affects The Activity Of MAPK3 Protein]	smpdb	IL10, IL2, IL6, MAPK3
1601	Sustaining Proliferative Signaling	TP53 Regulates Transcription Of Additional Cell Cycle Genes Whose Exact Role In The P53 Pathway Remain Uncertain	wikipathways	BTG2, CDC25C, CENPJ, CNOT1, CNOT10, CNOT11, CNOT2, CNOT3, CNOT4, CNOT6, CNOT6L, CNOT7, CNOT8, NPM1, PLAGL1, PLK2, PLK3, RGCC, RQCD1, TNKS1BP1, TP53
1599	Sustaining Proliferative Signaling	TP53 Regulates Transcription Of Genes Involved In G1 Cell Cycle Arrest	netpath	ARID3A, CCNA1, CCNA2, CCNE1, CCNE2, CDK2, CDKN1A, CDKN1B, E2F1, E2F7, PCBP4, TP53, ZNF385A
1600	Sustaining Proliferative Signaling	TP53 Regulates Transcription Of Genes Involved In G2 Cell Cycle Arrest	reactome	AURKA, BAX, CARM1, CCNB1, CDC25C, CDK1, E2F4, EP300, GADD45A, PCNA, PRMT1, RBL1, RBL2, SFN, TFDP1, TFDP2, TP53, ZNF385A
1666	Sustaining Proliferative Signaling	Transcriptional Activation Of Cell Cycle Inhibitor P21	reactome	CDKN1A, PCBP4, TP53, ZNF385A
1686	Sustaining Proliferative Signaling	Trk Receptor Signaling Mediated By PI3K And PLC Gamma	reactome	AGAP2, AKT1, BAD, CAMK2A, CAMK4, CCND1, CREB1, EGR1, EPB41L1, FOXO3, GAB1, GRB2, GSK3B, HRAS, KRAS, NGF, NRAS, NTRK1, PDPK1, PIK3CA, PIK3R1, PLCG1, PRKCD, SFN, SHC1, SOS1, SRC, STAT5A, TRPC3, TRPV1, YWHAB, YWHAE, YWHAG, YWHAH, YWHAQ, YWHAZ
1687	Sustaining Proliferative Signaling	Trk Receptor Signaling Mediated By The MAPK Pathway	reactome	BRAF, CDK5, CDK5R1, CREB1, EGR1, EHD4, ELK1, FOS, HRAS, KRAS, MAP2K1, MAP2K3, MAP2K5, MAP2K6, MAP3K2, MAPK1, MAPK14, MAPK3, MAPK7, MAPKAPK2, MEF2C, NRAS, NTF3, PRKCD, RAF1, RAP1A, RAP1B, RIT1, RIT2, RPS6KA1, RPS6KA5, RUSC1, SRF, TRPV1
1717	Sustaining Proliferative Signaling	Validated Targets Of C MYC Transcriptional Activation	panther	ACTL6A, BAX, BCAT1, BIRC5, BMI1, CAD, CCNB1, CCND2, CDC25A, CDCA7, CDK4, CREBBP, DDX18, DKC1, E2F3, EIF2S1, EIF4A1, EIF4E, EIF4G1, ENO1, EP300, FOSL1, GAPDH, GPAM, HMGA1, HSP90AA1, HSPA4, HSPD1, HUWE1, ID2, IREB2, KAT2A, KAT5, KIR3DL1, LDHA, LIN28B, MAX, MINA, MMP9, MTA1, MTDH, MYC, MYCT1, NBN, NCL, NDUFAF2, NME1, NME2, NPM1, ODC1, PDCD10, PEG10, PFKM, PIM1, PMAIP1, POLR3D, PRDX3, PTMA, RCC1, RPL…
1718	Sustaining Proliferative Signaling	Validated Targets Of C MYC Transcriptional Repression	reactome	ALDH9A1, BCL2, BRCA1, CCL5, CCND1, CDKN1A, CDKN1B, CDKN2B, CEBPA, CEBPD, CFLAR, CLU, COL1A2, CREB1, CSDE1, DDIT3, DKK1, DNMT3A, DNTT, EP300, ERBB2, FOXO3, FTH1, GADD45A, GFI1, GTF2H2, HDAC1, HDAC3, HMGCS2, ID2, IRF8, ITGA6, ITGB1, ITGB4, LGALS1, MAX, MXD4, MYC, NDRG1, NDRG2, NFYA, NFYB, NFYC, PDGFRB, PPP2R4, RBL1, S100A7, SFRP1, SFXN3, SLC11A1, SMAD2, SMAD3, SMAD4, SP1, SPI1, TBP, TJP2, TMEFF2, T…
1709	Sustaining Proliferative Signaling	VEGF Signaling Pathway	reactome	AKT1, ARAF, BRAF, CASP9, ETS1, HIF1A, HRAS, HSPB1, KDR, MAP2K1, MAP2K2, MAPK1, MAPK14, MAPK3, MAPKAPK2, MAPKAPK3, NOS3, NRAS, PIK3C2A, PIK3C2B, PIK3C3, PIK3CA, PIK3CB, PIK3CD, PIK3CG, PIK3R1, PIK3R2, PIK3R3, PLA2G4A, PLCG1, PLCG2, PRKCA, PRKCB, PRKCD, PRKCE, PRKCG, PRKCH, PRKCI, PRKCQ, PRKCZ, PRKD1, PRKD2, PRKD3, PTK2, PXN, RAC1, RAC2, RAC3, RAF1, SH2D2A, SHC2, SPHK1, SPHK2, VEGFA
50	Evading Growth Suppressors	APC Cdc20 Mediated Degradation Of Nek2A // APC/C:Cdc20 Mediated Degradation Of Mitotic Proteins // Inactivation Of APC/C Via Direct Inhibition Of The APC/C Complex	reactome	ANAPC1, ANAPC10, ANAPC11, ANAPC15, ANAPC16, ANAPC2, ANAPC4, ANAPC5, ANAPC7, BUB1B, BUB3, CDC16, CDC20, CDC23, CDC26, CDC27, MAD2L1, NEK2, RPS27A, UBA52, UBB, UBC, UBE2C, UBE2D1, UBE2E1
49	Evading Growth Suppressors	APC Truncation Mutants Have Impaired AXIN Binding // AXIN Missense Mutants Destabilize The Destruction Complex // Beta Catenin Phosphorylation Cascade // Misspliced GSK3beta Mutants Stabilize Beta Catenin // S33 Mutants Of Beta Catenin Aren't Phosphorylated // S37 Mutants Of Beta Catenin Aren't Phosphorylated // S45 Mutants Of Beta Catenin Aren't Phosphorylated // T41 Mutants Of Beta Catenin Aren…	reactome	AMER1, APC, AXIN1, CSNK1A1, CTNNB1, FRAT1, FRAT2, GSK3B, PPP2CA, PPP2CB, PPP2R1A, PPP2R1B, PPP2R5A, PPP2R5B, PPP2R5C, PPP2R5D, PPP2R5E
51	Evading Growth Suppressors	APC/C:Cdc20 Mediated Degradation Of Cyclin B	reactome	ANAPC1, ANAPC10, ANAPC11, ANAPC15, ANAPC16, ANAPC2, ANAPC4, ANAPC5, ANAPC7, CCNB1, CDC16, CDC20, CDC23, CDC26, CDC27, CDK1, RPS27A, UBA52, UBB, UBC, UBE2C, UBE2D1, UBE2E1
52	Evading Growth Suppressors	APC/C:Cdc20 Mediated Degradation Of Securin // APC/C:Cdh1 Mediated Degradation Of Cdc20 And Other APC/C:Cdh1 Targeted Proteins In Late Mitosis/early G1 // Autodegradation Of Cdh1 By Cdh1:APC/C // Cdc20:Phospho APC/C Mediated Degradation Of Cyclin A	reactome	ANAPC1, ANAPC10, ANAPC11, ANAPC15, ANAPC16, ANAPC2, ANAPC4, ANAPC5, ANAPC7, AURKA, AURKB, BUB1B, BUB3, CCNA1, CCNA2, CDC16, CDC20, CDC23, CDC26, CDC27, CDK1, FZR1, MAD2L1, PLK1, PSMA1, PSMA2, PSMA3, PSMA4, PSMA5, PSMA6, PSMA7, PSMA8, PSMB1, PSMB10, PSMB11, PSMB2, PSMB3, PSMB4, PSMB5, PSMB6, PSMB7, PSMB8, PSMB9, PSMC1, PSMC2, PSMC3, PSMC4, PSMC5, PSMC6, PSMD1, PSMD10, PSMD11, PSMD12, PSMD13, PSMD1…
66	Evading Growth Suppressors	AUF1 (hnRNP D0) Binds And Destabilizes MRNA // Autodegradation Of The E3 Ubiquitin Ligase COP1 // CDK Mediated Phosphorylation And Removal Of Cdc6 // CDT1 Association With The CDC6:ORC:origin Complex // Cross Presentation Of Soluble Exogenous Antigens (endosomes) // Dectin 1 Mediated Noncanonical NF KB Signaling // Degradation Of AXIN // Degradation Of DVL // Degradation Of GLI1 By The Proteasome…	reactome	APOBEC3G, ATM, AXIN1, AXIN2, AZIN1, BTRC, CCL17, CCL22, CCNA1, CCNA2, CCNB1, CCNB2, CCND1, CD207, CD4, CDC20, CDC25A, CDC6, CDK1, CDK2, CDK4, CDKN1A, CDKN1B, CDT1, CHEK1, CHEK2, CHUK, CSNK1A1, CUL1, CUL3, CUL5, DACT1, DERL2, DHH, DVL1, DVL2, DVL3, EIF4G1, ERLEC1, FBXO5, FBXW11, FCGR1A, FCGR1B, FKBPL, FZR1, GLI1, GLI2, GLI3, GMNN, GSK3B, GTSE1, HECW1, HHAT, HNRNPD, HSP90AA1, HSP90AB1, HSPA1A, HSPA…
337	Evading Growth Suppressors	Chk1/Chk2(Cds1) Mediated Inactivation Of Cyclin B:Cdk1 Complex	reactome	CCNB1, CDC25C, CDK1, CHEK1, SFN, WEE1, YWHAB, YWHAE, YWHAG, YWHAH, YWHAQ, YWHAZ
384	Evading Growth Suppressors	Conversion From APC/C:Cdc20 To APC/C:Cdh1 In Late Anaphase	reactome	ANAPC1, ANAPC10, ANAPC11, ANAPC15, ANAPC16, ANAPC2, ANAPC4, ANAPC5, ANAPC7, CDC14A, CDC16, CDC20, CDC23, CDC26, CDC27, FZR1, UBE2C, UBE2D1, UBE2E1
394	Evading Growth Suppressors	Cyclin A:Cdk2 Associated Events At S Phase Entry	reactome	CCNA1, CCNA2, CCNH, CDC25A, CDC25B, CDK2, CDK7, CDKN1A, CDKN1B, FZR1, MAX, MNAT1, MYC, RB1, WEE1
393	Evading Growth Suppressors	Cyclin A/B1 Associated Events During G2/M Transition	reactome	CCNA1, CCNA2, CCNB1, CCNB2, CCNH, CDC25A, CDC25B, CDC25C, CDK1, CDK2, CDK7, FOXM1, MNAT1, PKMYT1, PLK1, PPP2CA, PPP2CB, PPP2R1A, PPP2R1B, PPP2R2A, WEE1, XPO1
395	Evading Growth Suppressors	Cyclin B2 Mediated Events	reactome	CCNB2, CDC25A, CDC25B, CDC25C, CDK1
396	Evading Growth Suppressors	Cyclin D Associated Events In G1	reactome	CCND1, CCND2, CCND3, CCNH, CDK4, CDK6, CDK7, CDKN1A, CDKN1B, CDKN2A, CDKN2B, CDKN2C, CDKN2D, CKS1B, CUL1, E2F1, E2F2, E2F3, E2F4, E2F5, MNAT1, PPP2CA, PPP2CB, PPP2R1A, PPP2R1B, PPP2R2A, PPP2R3B, RB1, RBL1, RBL2, RPS27A, SKP1, SKP2, TFDP1, TFDP2, UBA52, UBB, UBC
397	Evading Growth Suppressors	Cyclin E Associated Events During G1/S Transition	reactome	CCNE1, CCNE2, CCNH, CDC25A, CDK2, CDK7, CDKN1A, CDKN1B, MAX, MNAT1, MYC, PKMYT1, RB1, WEE1
459	Evading Growth Suppressors	Direct P53 Effectors	reactome	AFP, AIFM2, APAF1, APC, ARID3A, ATF3, BAK1, BAX, BBC3, BCL2, BCL2A1, BCL2L1, BCL2L14, BCL2L2, BCL2L2-PABPN1, BCL6, BDKRB2, BID, BNIP3L, BTG2, CARM1, CASP1, CASP10, CASP6, CAV1, CCNB1, CCNG1, CCNK, CD82, CDKN1A, CEBPZ, COL18A1, CREBBP, CSE1L, CTSD, CX3CL1, DDB2, DDIT4, DDX5, DGCR8, DKK1, DROSHA, DUSP1, DUSP5, E2F1, E2F2, E2F3, EDN2, EGFR, EP300, EPHA2, FAS, FDXR, FOXA1, GADD45A, GDF15, GPX1, HDAC2…
472	Evading Growth Suppressors	Downregulation Of SMAD2/3:SMAD4 Transcriptional Activity	reactome	HDAC1, NCOR1, NCOR2, NEDD4L, PARP1, PPM1A, RNF111, RPS27A, SKI, SKIL, SMAD2, SMAD3, SMAD4, SMURF2, TGIF1, TGIF2, TRIM33, UBA52, UBB, UBC, UBE2D1, UBE2D3, USP9X
648	Evading Growth Suppressors	G2/M DNA Damage Checkpoint // Processing Of DNA Double Strand Break Ends	reactome	ATM, ATR, ATRIP, BABAM1, BARD1, BLM, BRCA1, BRCC3, BRE, BRIP1, CCNA1, CCNA2, CDK2, CHEK1, CHEK2, CLSPN, DNA2, EXO1, FAM175A, H2AFX, H2BFS, HERC2, HIST1H2BA, HIST1H2BB, HIST1H2BC, HIST1H2BD, HIST1H2BE, HIST1H2BF, HIST1H2BG, HIST1H2BH, HIST1H2BI, HIST1H2BJ, HIST1H2BK, HIST1H2BL, HIST1H2BM, HIST1H2BN, HIST1H2BO, HIST1H4A, HIST1H4B, HIST1H4C, HIST1H4D, HIST1H4E, HIST1H4F, HIST1H4H, HIST1H4I, HIST1H4J…
649	Evading Growth Suppressors	G2/M DNA Replication Checkpoint	wikipathways	CCNB1, CCNB2, CDK1, PKMYT1, WEE1
682	Evading Growth Suppressors	Gene Expression Of Smad6/7 By R Smad:smad4 ( TGF Beta Super Family Signaling Pathway(canonical) ) // Gene Expression Of Smad7 By R Smad:smad4 ( TGF Beta Super Family Signaling Pathway(canonical) )	inoh	SMAD1, SMAD2, SMAD3, SMAD4, SMAD5, SMAD6, SMAD7, SMAD9
860	Evading Growth Suppressors	Inhibition Of Replication Initiation Of Damaged DNA By RB1/E2F1	inoh	E2F1, POLA1, POLA2, PPP2CA, PPP2CB, PPP2R1A, PPP2R1B, PPP2R3B, PRIM1, PRIM2, RB1, TFDP1
1084	Evading Growth Suppressors	Negative Regulation Of (nuclear Import Of R Smad:smad4) In TGF Beta Super Family Signaling Pathway ( TGF Beta Super Family Signaling Pathway(canonical) )	reactome	MAPK1, MAPK10, MAPK11, MAPK12, MAPK13, MAPK14, MAPK3, MAPK7, MAPK8, MAPK9, SMAD1
1085	Evading Growth Suppressors	Negative Regulation Of (transcription By R Smad:smad4) In TGF Beta Super Family Signaling Pathway ( TGF Beta Super Family Signaling Pathway(canonical) )	reactome	HDAC1, HDAC2, HDAC3, HDAC4, HDAC5, HDAC6, HDAC7, HDAC8, HDAC9, SKI, SKIL, SMAD1, SMAD2, SMAD3, SMAD4, SMAD5, SMAD9, TLE1, TLE2, TLE3, TLE4
1094	Evading Growth Suppressors	Negative Regulation Of The PI3K/AKT Network	reactome	AKT1, AKT2, AKT3, PHLPP1, PHLPP2, PTEN, THEM4, TRIB3
1842	Evading Growth Suppressors	P53 Dependent G1 DNA Damage Response	pid // wikipathways	CCNA1, CCNA2, CCNE1, CCNE2, CDK2, CDKN1A, CDKN1B
1839	Evading Growth Suppressors	P53 Pathway	humancyc	AKT1, ATM, ATR, CDK2, CREBBP, EP300, KAT2B, MDM2, MDM4, PPP2CA, TP53
1840	Evading Growth Suppressors	P53 Pathway By Glucose Deprivation	humancyc	AKT1, AKT2, AKT3, EIF4EBP1, IGBP1, PPP2CA, PPP2CB, PRKAA1, PRKAA2, PRKAB1, PRKAB2, PRKAG1, RHEB, RPS6KB1, RPS6KB2, STK11, TP53, TP63, TP73, TSC1, TSC2
1153	Evading Growth Suppressors	P53 Pathway Feedback Loops 1	panther	MDM2, MDM4, RFWD2, TP53, TP63, TP73
1841	Evading Growth Suppressors	P53 Pathway Feedback Loops 2	reactome	AKT1, AKT2, AKT3, ATM, ATR, CCNA1, CCNA2, CCNE1, CCNG1, CDK2, CDKN1A, CTNNB1, HRAS, KRAS, MAPK11, MAPK12, MAPK13, MAPK14, MYC, NRAS, PDPK1, PIK3C2A, PIK3C2B, PIK3C2G, PIK3C3, PIK3CA, PIK3CB, PIK3CD, PIK3CG, PIK3R1, PIK3R2, PIK3R3, PIK3R5, PPP2CA, PPP2CB, PTEN, RB1, RBL1, SIAH1, TP53, TP63, TP73
1233	Evading Growth Suppressors	Phosphorylation Of The APC/C	reactome	ANAPC1, ANAPC10, ANAPC11, ANAPC15, ANAPC16, ANAPC2, ANAPC4, ANAPC5, ANAPC7, CCNB1, CDC16, CDC23, CDC26, CDC27, CDK1, PLK1, UBE2C, UBE2D1, UBE2E1
1336	Evading Growth Suppressors	Regulation Of APC/C Activators Between G1/S And Early Anaphase	reactome	ANAPC1, ANAPC10, ANAPC11, ANAPC15, ANAPC16, ANAPC2, ANAPC4, ANAPC5, ANAPC7, CCNA1, CCNA2, CCNB1, CDC16, CDC20, CDC23, CDC26, CDC27, CDK1, CDK2, FBXO5, FZR1, UBE2C, UBE2D1, UBE2E1
1354	Evading Growth Suppressors	Regulation Of TP53 Activity Through Acetylation	reactome	AKT1, AKT2, AKT3, BRD1, BRD7, BRPF1, BRPF3, CHD3, CHD4, EP300, GATAD2A, GATAD2B, HDAC1, HDAC2, ING5, KAT6A, MBD3, MEAF6, MTA2, PML, RBBP4, RBBP7, TP53
1355	Evading Growth Suppressors	Regulation Of TP53 Activity Through Association With Co Factors	reactome	AKT1, AKT2, AKT3, BANP, PHF20, POU4F1, POU4F2, PPP1R13B, PPP1R13L, TP53, TP53BP2, TP63, TP73, ZNF385A
1356	Evading Growth Suppressors	Regulation Of TP53 Activity Through Methylation	pid	ATM, CHEK2, EHMT1, EHMT2, EP300, JMY, KMT5A, L3MBTL1, MDM2, MDM4, PRMT5, RPS27A, SETD9, SMYD2, TP53, TTC5, UBA52, UBB, UBC
1357	Evading Growth Suppressors	Regulation Of TP53 Activity Through Phosphorylation	reactome	ATM, ATR, ATRIP, AURKA, AURKB, BARD1, BLM, BRCA1, BRIP1, CCNA1, CCNA2, CDK2, CDK5, CDK5R1, CHEK1, CHEK2, CSNK2A1, CSNK2A2, CSNK2B, DNA2, DYRK2, EXO1, HIPK1, HIPK2, HUS1, KAT5, MAPK11, MAPK14, MAPKAPK5, MDM2, MDM4, MRE11A, NBN, NOC2L, NUAK1, PIN1, PLK3, PRKAA1, PRKAA2, PRKAB1, PRKAB2, PRKAG1, PRKAG2, PRKAG3, RAD1, RAD17, RAD50, RAD9A, RAD9B, RBBP8, RFC2, RFC3, RFC4, RFC5, RHNO1, RMI1, RMI2, RPA1, …
1358	Evading Growth Suppressors	Regulation Of TP53 Degradation	pid	AKT1, AKT2, AKT3, ATM, CCNA1, CCNA2, CCNG1, CDK1, CDK2, CDKN2A, CHEK2, DAXX, MAPKAP1, MDM2, MDM4, MLST8, MTOR, PDPK1, PPP2CA, PPP2CB, PPP2R1A, PPP2R1B, PPP2R5C, PRR5, RFFL, RICTOR, RNF34, RPS27A, SGK1, TP53, UBA52, UBB, UBC, USP2, USP7
1443	Evading Growth Suppressors	Senescence And Autophagy In Cancer	reactome	CREG1, IFNB1, ING1, IRF1, JUN, MTOR, TP53
1419	Evading Growth Suppressors	SMAD2/SMAD3:SMAD4 Heterotrimer Regulates Transcription	reactome	ATP1B4, CCNC, CCNK, CCNT1, CCNT2, CDK8, CDK9, CDKN2B, E2F4, E2F5, HDAC1, JUNB, MEN1, MYC, RBL1, RNF111, RPS27A, SERPINE1, SMAD2, SMAD3, SMAD4, SMAD7, SNW1, SP1, TFDP1, TFDP2, TGIF1, TGIF2, UBA52, UBB, UBC, WWTR1
1514	Evading Growth Suppressors	Stabilization Of P53	kegg // smpdb	ATM, CHEK2, MDM2, MDM4, RPS27A, TP53, UBA52, UBB, UBC
1627	Evading Growth Suppressors	Tetrachlorodibenzodioxin Inhibits The Reaction [[AHR Protein Binds To CDK4 Protein, CCND1 Protein] Results In Increased Phosphorylation Of RB1 Protein]	smpdb	AHR, CCND1, CDK4, RB1
1582	Evading Growth Suppressors	TGF Beta Receptor	pid	ACVRL1, AKT1, ANAPC1, ANAPC10, ANAPC2, ANAPC4, ANAPC5, ANAPC7, AP2B1, AR, ARRB2, ATF2, ATF3, AXIN1, AXIN2, BCAR1, BRCA1, BTRC, CAMK2A, CAMK2B, CAMK2D, CAMK2G, CAV1, CCNB2, CCND1, CCNE1, CD44, CDC16, CDC23, CDC25A, CDC27, CDK1, CDK2, CDK4, CDK6, CDKN1A, CHUK, CITED1, COPS5, CREBBP, CRK, CSNK1G2, CTCF, CTNNA1, CTNNA2, CTNNB1, CUL1, DAB2, DAXX, DCP1A, DDX5, DVL1, DYNC1I1, DYNLRB1, DYNLRB2, E2F4, E2F…
1577	Evading Growth Suppressors	TGF Beta Receptor Signaling	reactome	ARRB2, AXIN1, BAMBI, CAMK2A, CAV1, CTGF, CTNNB1, DAB2, DACT2, DAXX, DYNLRB1, EIF2A, FKBP1A, GRB2, ITCH, MAP3K7, NEDD4L, OCLN, PARD6A, PDPK1, PML, PPP1CA, PPP1R15A, PPP2CA, PPP2CB, PPP2R2A, RNF111, RPS6KB1, SHC1, SMAD2, SMAD3, SMAD4, SMAD7, SMURF1, SMURF2, SOS1, SPTBN1, STRAP, TAB1, TAB2, TFAP2B, TGFB1, TGFB3, TGFBR1, TGFBR2, TGFBR3, TGFBRAP1, WWP1, XIAP, YAP1, YWHAE, ZFYVE16, ZFYVE9
1578	Evading Growth Suppressors	TGF Beta Receptor Signaling Activates SMADs	humancyc // panther	CBL, FKBP1A, FURIN, NEDD8, SMAD2, SMAD3, SMAD4, TGFB1, TGFBR1, TGFBR2, UBE2M, ZFYVE9
1579	Evading Growth Suppressors	TGF Beta Receptor Signaling In EMT (epithelial To Mesenchymal Transition)	reactome	ARHGEF18, CGN, F11R, FKBP1A, PARD3, PARD6A, PRKCZ, RHOA, RPS27A, SMURF1, TGFB1, TGFBR1, TGFBR2, UBA52, UBB, UBC
1576	Evading Growth Suppressors	TGF Beta Signaling Pathway(through TAK1) ( TGF Beta Signaling(through TAK1) )	wikipathways	MAP3K7, TAB1, TGFB1, TGFB2, TGFB3, TGFBR1, TGFBR2, XIAP
1580	Evading Growth Suppressors	TGF Beta Super Family Signaling Pathway(canonical) ( TGF Beta BMP Diagram(MolecularVariation) )	netpath	ACVR1, ACVR1B, ACVR2A, ACVR2B, ACVRL1, AMHR2, BMP10, BMP15, BMP2, BMP3, BMP4, BMP5, BMP6, BMP7, BMP8B, BMPR1A, BMPR1B, BMPR2, CREBBP, EP300, GDF10, GDF11, GDF2, GDF3, GDF5, GDF6, GDF7, GDF9, INHA, INHBA, INHBB, INHBC, INHBE, MAML1, MAML2, MAML3, MSTN, NODAL, SMAD1, SMAD2, SMAD3, SMAD4, SMAD5, SMAD9, SMARCA4, TGFB1, TGFB2, TGFB3, TGFBR1, TGFBR2, WT1
1593	Evading Growth Suppressors	TP53 Network	reactome	MYC, SUMO1, TNFSF10, TP53, TP63, TP73
1594	Evading Growth Suppressors	TP53 Regulates Metabolic Genes	inoh	AGO1, AGO2, AGO3, AGO4, AKT1, AKT2, AKT3, COX11, COX14, COX16, COX18, COX20, COX4I1, COX5A, COX5B, COX6A1, COX6B1, COX6C, COX7A2L, COX7B, COX7C, COX8A, CYCS, DDIT4, G6PD, GLS, GLS2, GPI, GPX2, GSR, LAMTOR1, LAMTOR2, LAMTOR3, LAMTOR4, LAMTOR5, LRPPRC, MLST8, MOV10, MT-CO1, MT-CO2, MT-CO3, MTOR, NDUFA4, PRDX1, PRDX2, PRDX5, PRKAA1, PRKAA2, PRKAB1, PRKAB2, PRKAG1, PRKAG2, PRKAG3, PTEN, RHEB, RPTOR, …
1601	Evading Growth Suppressors	TP53 Regulates Transcription Of Additional Cell Cycle Genes Whose Exact Role In The P53 Pathway Remain Uncertain	wikipathways	BTG2, CDC25C, CENPJ, CNOT1, CNOT10, CNOT11, CNOT2, CNOT3, CNOT4, CNOT6, CNOT6L, CNOT7, CNOT8, NPM1, PLAGL1, PLK2, PLK3, RGCC, RQCD1, TNKS1BP1, TP53
1595	Evading Growth Suppressors	TP53 Regulates Transcription Of Caspase Activators And Caspases	reactome	APAF1, ATM, CASP1, CASP10, CASP2, CASP6, CRADD, NLRC4, PIDD1, TP53, TP63, TP73
1597	Evading Growth Suppressors	TP53 Regulates Transcription Of Death Receptors And Ligands	reactome	FAS, IGFBP3, PPP1R13B, TMEM219, TNFRSF10A, TNFRSF10B, TNFRSF10C, TNFRSF10D, TP53, TP53BP2, TP63, TP73
1596	Evading Growth Suppressors	TP53 Regulates Transcription Of DNA Repair Genes	reactome	ATF2, ATM, ATR, BRCA1, CCNH, CCNK, CCNT1, CCNT2, CDK12, CDK13, CDK7, CDK9, CHEK1, CTDP1, DDB2, ELL, ERCC2, ERCC3, FANCC, FANCD2, FANCI, FOS, GTF2F1, GTF2F2, GTF2H1, GTF2H2, GTF2H3, GTF2H4, GTF2H5, JUN, MDC1, MLH1, MNAT1, MSH2, NELFA, NELFB, NELFCD, NELFE, PMS2, POLR2A, POLR2B, POLR2C, POLR2D, POLR2E, POLR2F, POLR2G, POLR2H, POLR2I, POLR2J, POLR2K, POLR2L, RAD51D, SSRP1, SUPT16H, SUPT4H1, SUPT5H, …
1598	Evading Growth Suppressors	TP53 Regulates Transcription Of Genes Involved In Cytochrome C Release	reactome	AIFM2, ATM, BAX, BBC3, BID, BNIP3L, CREBBP, PMAIP1, PPP1R13B, PRELID1, STEAP3, TP53, TP53AIP1, TP53BP2, TP53INP1, TP63, TP73, TRIAP1, ZNF420
1599	Evading Growth Suppressors	TP53 Regulates Transcription Of Genes Involved In G1 Cell Cycle Arrest	netpath	ARID3A, CCNA1, CCNA2, CCNE1, CCNE2, CDK2, CDKN1A, CDKN1B, E2F1, E2F7, PCBP4, TP53, ZNF385A
1600	Evading Growth Suppressors	TP53 Regulates Transcription Of Genes Involved In G2 Cell Cycle Arrest	reactome	AURKA, BAX, CARM1, CCNB1, CDC25C, CDK1, E2F4, EP300, GADD45A, PCNA, PRMT1, RBL1, RBL2, SFN, TFDP1, TFDP2, TP53, ZNF385A
1602	Evading Growth Suppressors	TP53 Regulates Transcription Of Several Additional Cell Death Genes Whose Specific Roles In P53 Dependent Apoptosis Remain Uncertain	reactome	BCL2L14, BCL6, BIRC5, CHM, NDRG1, PERP, PPP1R13B, RABGGTA, RABGGTB, TP53, TP53BP2, TP53I3, TP63, TP73
170	Avoiding Immune Destruction	Antigen Presentation: Folding, Assembly And Peptide Loading Of Class I MHC	reactome	B2M, CALR, CANX, ERAP1, ERAP2, HLA-A, HLA-B, HLA-C, HLA-E, HLA-F, HLA-G, HLA-H, HSPA5, PDIA3, SAR1B, SEC13, SEC23A, SEC24A, SEC24B, SEC24C, SEC24D, SEC31A, TAP1, TAP2, TAPBP
50	Avoiding Immune Destruction	APC Cdc20 Mediated Degradation Of Nek2A // APC/C:Cdc20 Mediated Degradation Of Mitotic Proteins // Inactivation Of APC/C Via Direct Inhibition Of The APC/C Complex	reactome	ANAPC1, ANAPC10, ANAPC11, ANAPC15, ANAPC16, ANAPC2, ANAPC4, ANAPC5, ANAPC7, BUB1B, BUB3, CDC16, CDC20, CDC23, CDC26, CDC27, MAD2L1, NEK2, RPS27A, UBA52, UBB, UBC, UBE2C, UBE2D1, UBE2E1
49	Avoiding Immune Destruction	APC Truncation Mutants Have Impaired AXIN Binding // AXIN Missense Mutants Destabilize The Destruction Complex // Beta Catenin Phosphorylation Cascade // Misspliced GSK3beta Mutants Stabilize Beta Catenin // S33 Mutants Of Beta Catenin Aren't Phosphorylated // S37 Mutants Of Beta Catenin Aren't Phosphorylated // S45 Mutants Of Beta Catenin Aren't Phosphorylated // T41 Mutants Of Beta Catenin Aren…	reactome	AMER1, APC, AXIN1, CSNK1A1, CTNNB1, FRAT1, FRAT2, GSK3B, PPP2CA, PPP2CB, PPP2R1A, PPP2R1B, PPP2R5A, PPP2R5B, PPP2R5C, PPP2R5D, PPP2R5E
51	Avoiding Immune Destruction	APC/C:Cdc20 Mediated Degradation Of Cyclin B	reactome	ANAPC1, ANAPC10, ANAPC11, ANAPC15, ANAPC16, ANAPC2, ANAPC4, ANAPC5, ANAPC7, CCNB1, CDC16, CDC20, CDC23, CDC26, CDC27, CDK1, RPS27A, UBA52, UBB, UBC, UBE2C, UBE2D1, UBE2E1
52	Avoiding Immune Destruction	APC/C:Cdc20 Mediated Degradation Of Securin // APC/C:Cdh1 Mediated Degradation Of Cdc20 And Other APC/C:Cdh1 Targeted Proteins In Late Mitosis/early G1 // Autodegradation Of Cdh1 By Cdh1:APC/C // Cdc20:Phospho APC/C Mediated Degradation Of Cyclin A	reactome	ANAPC1, ANAPC10, ANAPC11, ANAPC15, ANAPC16, ANAPC2, ANAPC4, ANAPC5, ANAPC7, AURKA, AURKB, BUB1B, BUB3, CCNA1, CCNA2, CDC16, CDC20, CDC23, CDC26, CDC27, CDK1, FZR1, MAD2L1, PLK1, PSMA1, PSMA2, PSMA3, PSMA4, PSMA5, PSMA6, PSMA7, PSMA8, PSMB1, PSMB10, PSMB11, PSMB2, PSMB3, PSMB4, PSMB5, PSMB6, PSMB7, PSMB8, PSMB9, PSMC1, PSMC2, PSMC3, PSMC4, PSMC5, PSMC6, PSMD1, PSMD10, PSMD11, PSMD12, PSMD13, PSMD1…
303	Avoiding Immune Destruction	Cadmium Chloride Inhibits The Reaction [[IL1B Protein Co Treated With TNF Protein, IFNG Protein] Results In Increased Activity Of NOS2 Protein] // Deoxynivalenol Inhibits The Reaction [[IFNG Protein Co Treated With TNF Protein, IL1B Protein] Results In Increased Expression Of NOS2 Protein] // Diclofenac Promotes The Reaction [[IL1B Protein Co Treated With TNF Protein, IFNG Protein] Results In Inc…	reactome	IFNG, IL1B, NOS2, TNF
384	Avoiding Immune Destruction	Conversion From APC/C:Cdc20 To APC/C:Cdh1 In Late Anaphase	reactome	ANAPC1, ANAPC10, ANAPC11, ANAPC15, ANAPC16, ANAPC2, ANAPC4, ANAPC5, ANAPC7, CDC14A, CDC16, CDC20, CDC23, CDC26, CDC27, FZR1, UBE2C, UBE2D1, UBE2E1
419	Avoiding Immune Destruction	DEx/H Box Helicases Activate Type I IFN And Inflammatory Cytokines Production	reactome	AGER, APP, DHX36, DHX9, HMGB1, IRF7, MYD88, NFKB1, NFKB2, RELA, S100A12, S100B, SAA1
457	Avoiding Immune Destruction	Dimethyl Sulfoxide Inhibits The Reaction [[Lipopolysaccharides Co Treated With IL1B Protein, TNF Protein, IFNG Protein] Results In Increased Secretion Of CCL5 Protein]	wikipathways	CCL5, IFNG, IL1B, TNF
458	Avoiding Immune Destruction	Dimethyl Sulfoxide Inhibits The Reaction [[Lipopolysaccharides Co Treated With IL1B Protein, TNF Protein, IFNG Protein] Results In Increased Secretion Of IL6 Protein]	reactome	IFNG, IL1B, IL6, TNF
792	Avoiding Immune Destruction	IFN Alpha Signaling Pathway((JAK1 TYK2 STAT1 STAT2) ( IFN Alpha Signaling(JAK1 TYK2 STAT1 STAT2 STAT3) ) // IFN Alpha Signaling Pathway(JAK1 TYK2 STAT1 STAT3) ( IFN Alpha Signaling(JAK1 TYK2 STAT1 STAT2 STAT3) ) // IFN Alpha Signaling Pathway(JAK1 TYK2 STAT1) ( IFN Alpha Signaling(JAK1 TYK2 STAT1 STAT2 STAT3) ) // IFN Alpha Signaling Pathway(JAK1 TYK2 STAT3) ( IFN Alpha Signaling(JAK1 TYK2 STAT1 …	reactome	IFNA1, IFNA10, IFNA13, IFNA14, IFNA16, IFNA17, IFNA2, IFNA21, IFNA4, IFNA5, IFNA6, IFNA7, IFNA8, IFNAR1, IFNAR2, IRF9, JAK1, STAT1, STAT2, STAT3, TYK2
794	Avoiding Immune Destruction	IFN Gamma Pathway	wikipathways	AKT1, CALM1, CALM2, CALM3, CAMK2A, CAMK2B, CAMK2D, CAMK2G, CASP1, CBL, CEBPB, CREBBP, CRKL, DAPK1, EP300, IFNG, IFNGR1, IL1B, IRF1, IRF9, JAK1, JAK2, MAP2K1, MAP3K1, MAP3K11, MAPK1, MAPK3, MTOR, PIAS1, PIAS4, PIK3CA, PIK3R1, PRKCD, PTGES2, PTPN11, PTPN2, RAP1A, RAP1B, RAPGEF1, SMAD7, SOCS1, STAT1, STAT3
793	Avoiding Immune Destruction	IFN Gamma Signaling Pathway(JAK1 JAK2 STAT1) ( IFN Gamma Signaling(JAK1 JAK2 STAT1) )	netpath	IFNG, IFNGR1, IFNGR2, JAK1, JAK2, STAT1
845	Avoiding Immune Destruction	IRF3 Mediated Activation Of Type 1 IFN	reactome	DTX4, IRF3, NLRP4, TBK1, TMEM173, ZBP1
846	Avoiding Immune Destruction	IRF3 Mediated Induction Of Type I IFN	reactome	DDX41, DTX4, IFI16, IRF3, MRE11A, NLRP4, PRKDC, TBK1, TMEM173, TREX1, XRCC5, XRCC6, ZBP1
949	Avoiding Immune Destruction	LRR FLII Interacting Protein 1 (LRRFIP1) Activates Type I IFN Production	pid	CREBBP, CTNNB1, EP300, IRF3, LRRFIP1
980	Avoiding Immune Destruction	MHC Class II Antigen Presentation	reactome	ACTR1A, ACTR1B, AP1B1, AP1G1, AP1M1, AP1M2, AP1S1, AP1S2, AP1S3, AP2A1, AP2A2, AP2B1, AP2M1, AP2S1, ARF1, CANX, CD74, CENPE, CLTA, CLTC, CTSA, CTSB, CTSC, CTSD, CTSE, CTSF, CTSH, CTSK, CTSL, CTSO, CTSS, CTSV, DCTN1, DCTN2, DCTN3, DCTN4, DCTN5, DCTN6, DNM1, DNM2, DNM3, DYNC1H1, DYNC1I1, DYNC1I2, DYNC1LI2, DYNC2H1, DYNC2LI1, DYNLL1, DYNLL2, HLA-DMA, HLA-DMB, HLA-DOA, HLA-DOB, HLA-DPA1, HLA-DPB1, HL…
1080	Avoiding Immune Destruction	Nef Mediated Downregulation Of MHC Class I Complex Cell Surface Expression	pid	AP1B1, AP1G1, AP1M1, AP1M2, AP1S1, AP1S2, AP1S3, B2M, HLA-A, PACS1
1095	Avoiding Immune Destruction	Negative Regulators Of RIG I/MDA5 Signaling	reactome	ATG12, ATG5, CYLD, DDX58, HERC5, IFIH1, IKBKE, IRF3, ISG15, ITCH, MAVS, NLRC5, NLRX1, OTUD5, PCBP2, PIN1, RNF125, RNF135, RNF216, RPS27A, TAX1BP1, TBK1, TNFAIP3, TRAF3, TRIM25, UBA52, UBA7, UBB, UBC, UBE2D1, UBE2D2, UBE2D3, UBE2K, UBE2L6
1233	Avoiding Immune Destruction	Phosphorylation Of The APC/C	reactome	ANAPC1, ANAPC10, ANAPC11, ANAPC15, ANAPC16, ANAPC2, ANAPC4, ANAPC5, ANAPC7, CCNB1, CDC16, CDC23, CDC26, CDC27, CDK1, PLK1, UBE2C, UBE2D1, UBE2E1
1336	Avoiding Immune Destruction	Regulation Of APC/C Activators Between G1/S And Early Anaphase	reactome	ANAPC1, ANAPC10, ANAPC11, ANAPC15, ANAPC16, ANAPC2, ANAPC4, ANAPC5, ANAPC7, CCNA1, CCNA2, CCNB1, CDC16, CDC20, CDC23, CDC26, CDC27, CDK1, CDK2, FBXO5, FZR1, UBE2C, UBE2D1, UBE2E1
1344	Avoiding Immune Destruction	Regulation Of IFNA Signaling	wikipathways	IFNA1, IFNA10, IFNA13, IFNA14, IFNA16, IFNA17, IFNA2, IFNA21, IFNA4, IFNA5, IFNA6, IFNA7, IFNA8, IFNAR1, IFNAR2, IFNB1, JAK1, PTPN1, PTPN11, PTPN6, SOCS1, SOCS3, STAT1, STAT2, TYK2, USP18
1345	Avoiding Immune Destruction	Regulation Of IFNG Signaling	pid	IFNG, IFNGR1, IFNGR2, JAK1, JAK2, PIAS1, PTPN1, PTPN11, PTPN2, PTPN6, SOCS1, SOCS3, STAT1, SUMO1
1369	Avoiding Immune Destruction	Regulation Of Innate Immune Responses To Cytosolic DNA	pid	DDX41, DTX4, IRF3, NLRP4, RPS27A, TBK1, TMEM173, TRIM21, TRIM32, TRIM56, UBA52, UBB, UBC, ZBP1
1299	Avoiding Immune Destruction	RIG I/MDA5 Mediated Induction Of IFN Alpha/beta Pathways	reactome	DDX58, DHX58, HERC5, IFIH1, ISG15, MAVS, NLRC5, NLRX1, RNF135, TKFC, TRIM25, UBA7, UBE2L6
1422	Avoiding Immune Destruction	STING Mediated Induction Of Host Immune Responses	pid	DDX41, IFI16, MB21D1, TMEM173, TRIM21
421	Enabling Replicative Immortality	DNA Damage/Telomere Stress Induced Senescence	reactome	ACD, ATM, CCNA1, CCNA2, CCNE1, CCNE2, CDK2, CDKN1A, CDKN1B, EP400, H2AFB1, H2AFX, H2AFZ, H2BFS, HIST1H2AB, HIST1H2AC, HIST1H2AD, HIST1H2AE, HIST1H2AJ, HIST1H2BA, HIST1H2BB, HIST1H2BC, HIST1H2BD, HIST1H2BE, HIST1H2BF, HIST1H2BG, HIST1H2BH, HIST1H2BI, HIST1H2BJ, HIST1H2BK, HIST1H2BL, HIST1H2BM, HIST1H2BN, HIST1H2BO, HIST1H4A, HIST1H4B, HIST1H4C, HIST1H4D, HIST1H4E, HIST1H4F, HIST1H4H, HIST1H4I, HIS…
422	Enabling Replicative Immortality	DNA Replication Initiation // Telomere C Strand Synthesis Initiation	reactome	POLA1, POLA2, POLE, POLE2, PRIM1, PRIM2
614	Enabling Replicative Immortality	Formation Of Senescence Associated Heterochromatin Foci (SAHF)	reactome	ASF1A, CABIN1, CDKN1A, EP400, H1F0, HIRA, HIST1H1A, HIST1H1B, HIST1H1C, HIST1H1D, HIST1H1E, HMGA1, HMGA2, LMNB1, RB1, TP53, UBN1
1132	Enabling Replicative Immortality	Oncogene Induced Senescence	reactome	AGO1, AGO3, AGO4, CDK4, CDK6, CDKN2A, CDKN2B, CDKN2C, CDKN2D, E2F1, E2F2, E2F3, ERF, ETS1, ETS2, ID1, MAPK1, MAPK3, MDM2, MOV10, RPS27A, SP1, TFDP1, TNRC6A, TNRC6B, TNRC6C, TP53, UBA52, UBB, UBC
1146	Enabling Replicative Immortality	Oxidative Stress Induced Senescence	wikipathways	AGO1, AGO3, AGO4, BMI1, CBX2, CBX4, CBX6, CBX8, CDK4, CDK6, CDKN2A, CDKN2B, CDKN2C, CDKN2D, E2F1, E2F2, E2F3, EED, EZH2, FOS, H2AFB1, H2AFX, H2AFZ, H2BFS, H3F3A, H3F3B, HIST1H2AB, HIST1H2AC, HIST1H2AD, HIST1H2AE, HIST1H2AJ, HIST1H2BA, HIST1H2BB, HIST1H2BC, HIST1H2BD, HIST1H2BE, HIST1H2BF, HIST1H2BG, HIST1H2BH, HIST1H2BI, HIST1H2BJ, HIST1H2BK, HIST1H2BL, HIST1H2BM, HIST1H2BN, HIST1H2BO, HIST1H3A, …
1204	Enabling Replicative Immortality	Packaging Of Telomere Ends	reactome	ACD, H2AFB1, H2AFX, H2AFZ, H2BFS, HIST1H2AB, HIST1H2AC, HIST1H2AD, HIST1H2AE, HIST1H2AJ, HIST1H2BA, HIST1H2BB, HIST1H2BC, HIST1H2BD, HIST1H2BE, HIST1H2BF, HIST1H2BG, HIST1H2BH, HIST1H2BI, HIST1H2BJ, HIST1H2BK, HIST1H2BL, HIST1H2BM, HIST1H2BN, HIST1H2BO, HIST1H4A, HIST1H4B, HIST1H4C, HIST1H4D, HIST1H4E, HIST1H4F, HIST1H4H, HIST1H4I, HIST1H4J, HIST1H4K, HIST1H4L, HIST2H2AA3, HIST2H2AA4, HIST2H2AC, …
1248	Enabling Replicative Immortality	Polymerase Switching // Polymerase Switching On The C Strand Of The Telomere	reactome	PCNA, POLA1, POLA2, POLD1, POLD2, POLD3, POLD4, PRIM1, PRIM2, RFC1, RFC2, RFC3, RFC4, RFC5
1262	Enabling Replicative Immortality	Processive Synthesis On The C Strand Of The Telomere // Telomere C Strand (Lagging Strand) Synthesis	reactome	LIG1, PCNA, POLD1, POLD2, POLD3, POLD4
1327	Enabling Replicative Immortality	Recognition Of DNA Damage By PCNA Containing Replication Complex	inoh	CUL4A, CUL4B, DDB1, DTL, PCNA, POLD1, POLD2, POLD3, POLD4, POLE, POLE2, RAD18, RBX1, RFC1, RFC2, RFC3, RFC4, RFC5, RPA1, RPA2, RPA3, RPS27A, UBA52, UBB, UBC, UBE2B, USP1, ZBTB32
1359	Enabling Replicative Immortality	Regulation Of Telomerase	pid	ABL1, ACD, AKT1, ATM, BLM, CCND1, CDKN1B, DCLRE1B, DKC1, E2F1, EGF, EGFR, ESR1, FOS, HDAC1, HDAC2, HNRNPC, HSP90AA1, HUS1, IFNAR2, IFNG, IL2, IRF1, JUN, MAPK1, MAPK3, MAX, MRE11A, MTOR, MXD1, MYC, NBN, NCL, NFKB1, NR2F2, PARP2, PIF1, PINX1, POT1, PRKCA, PTGES3, RAD1, RAD50, RAD9A, RBBP4, RBBP7, RPS6KB1, SAP18, SAP30, SIN3A, SIN3B, SMAD3, SMG5, SMG6, SP1, SP3, TERF1, TERF2, TERF2IP, TERT, TGFB1, T…
1443	Enabling Replicative Immortality	Senescence And Autophagy In Cancer	reactome	CREG1, IFNB1, ING1, IRF1, JUN, MTOR, TP53
1444	Enabling Replicative Immortality	Senescence Associated Secretory Phenotype (SASP)	inoh	ANAPC1, ANAPC10, ANAPC11, ANAPC15, ANAPC16, ANAPC2, ANAPC4, ANAPC5, ANAPC7, CCNA1, CCNA2, CDC16, CDC23, CDC26, CDC27, CDK2, CDK4, CDK6, CDKN1A, CDKN1B, CDKN2A, CDKN2B, CDKN2C, CDKN2D, CEBPB, CXCL8, EHMT1, EHMT2, FOS, FZR1, H2AFB1, H2AFX, H2AFZ, H2BFS, H3F3A, H3F3B, HIST1H2AB, HIST1H2AC, HIST1H2AD, HIST1H2AE, HIST1H2AJ, HIST1H2BA, HIST1H2BB, HIST1H2BC, HIST1H2BD, HIST1H2BE, HIST1H2BF, HIST1H2BG, H…
1621	Enabling Replicative Immortality	Telomere Extension By Telomerase	reactome	DKC1, NHP2, RUVBL1, RUVBL2, TERT, WRAP53
226	Tumour-Promoting Inflammation	BMP Signaling Pathway ( TGF Beta BMP Diagram(MolecularVariation) )	inoh	BMP10, BMP15, BMP2, BMP3, BMP4, BMP5, BMP6, BMP7, BMP8B, BMPR1A, BMPR1B, BMPR2, CREBBP, EP300, GDF10, GDF11, GDF2, GDF3, GDF5, GDF6, GDF7, GDF9, MAML1, MAML2, MAML3, MSTN, SMAD1, SMAD2, SMAD3, SMAD4, SMAD5, SMAD9, SMARCA4, WT1
227	Tumour-Promoting Inflammation	BMP2 Signaling Pathway(through Smad) ( TGF Beta BMP Diagram(MolecularVariation) )	inoh	BAMBI, BMP2, BMPR1A, BMPR1B, BMPR2, CREBBP, EP300, SMAD1, SMAD4, SMAD6, SMAD7, STAT3, ZNF423
303	Tumour-Promoting Inflammation	Cadmium Chloride Inhibits The Reaction [[IL1B Protein Co Treated With TNF Protein, IFNG Protein] Results In Increased Activity Of NOS2 Protein] // Deoxynivalenol Inhibits The Reaction [[IFNG Protein Co Treated With TNF Protein, IL1B Protein] Results In Increased Expression Of NOS2 Protein] // Diclofenac Promotes The Reaction [[IL1B Protein Co Treated With TNF Protein, IFNG Protein] Results In Inc…	reactome	IFNG, IL1B, NOS2, TNF
336	Tumour-Promoting Inflammation	Chemokine Receptors Bind Chemokines	pid	ACKR2, ACKR3, ACKR4, CCL1, CCL11, CCL16, CCL17, CCL19, CCL2, CCL20, CCL21, CCL22, CCL25, CCL27, CCL28, CCL3, CCL3L1, CCL3L3, CCL4, CCL5, CCL7, CCR1, CCR10, CCR2, CCR3, CCR4, CCR5, CCR6, CCR7, CCR8, CCR9, CCRL2, CX3CL1, CX3CR1, CXCL1, CXCL10, CXCL11, CXCL12, CXCL13, CXCL16, CXCL2, CXCL3, CXCL5, CXCL6, CXCL8, CXCL9, CXCR1, CXCR2, CXCR3, CXCR4, CXCR5, CXCR6, PF4, PPBP, XCL1, XCL2, XCR1
401	Tumour-Promoting Inflammation	Cytokine Gene Transcription	smpdb	AKT1, CSF2, IL13, IL3, IL4, IL5, MAPK1, MAPK14, MAPK8, PRKCA, TNF
402	Tumour-Promoting Inflammation	Cytokine Receptor Degradation Signaling ( JAK STAT Pathway And Regulation Pathway Diagram ) // Negative Regulation Of (Phosphorylation Of Cytokine Receptor) In JAK STAT Pathway ( JAK STAT Pathway And Regulation Pathway Diagram )	kegg	CNTFR, CSF2RA, CSF2RB, CSF3R, CXCR1, CXCR2, EPOR, GHR, IFNAR1, IFNAR2, IFNGR1, IFNGR2, IL10RA, IL10RB, IL12RB1, IL12RB2, IL13RA1, IL13RA2, IL15RA, IL17RA, IL18R1, IL1R1, IL1R2, IL1RAP, IL2RA, IL2RB, IL2RG, IL3RA, IL4R, IL5RA, IL6R, IL6ST, IL7R, IL9R, LEPR, LIFR, MPL, OSMR, PRLR, PTPN6, SOCS3
419	Tumour-Promoting Inflammation	DEx/H Box Helicases Activate Type I IFN And Inflammatory Cytokines Production	reactome	AGER, APP, DHX36, DHX9, HMGB1, IRF7, MYD88, NFKB1, NFKB2, RELA, S100A12, S100B, SAA1
457	Tumour-Promoting Inflammation	Dimethyl Sulfoxide Inhibits The Reaction [[Lipopolysaccharides Co Treated With IL1B Protein, TNF Protein, IFNG Protein] Results In Increased Secretion Of CCL5 Protein]	wikipathways	CCL5, IFNG, IL1B, TNF
458	Tumour-Promoting Inflammation	Dimethyl Sulfoxide Inhibits The Reaction [[Lipopolysaccharides Co Treated With IL1B Protein, TNF Protein, IFNG Protein] Results In Increased Secretion Of IL6 Protein]	reactome	IFNG, IL1B, IL6, TNF
472	Tumour-Promoting Inflammation	Downregulation Of SMAD2/3:SMAD4 Transcriptional Activity	reactome	HDAC1, NCOR1, NCOR2, NEDD4L, PARP1, PPM1A, RNF111, RPS27A, SKI, SKIL, SMAD2, SMAD3, SMAD4, SMURF2, TGIF1, TGIF2, TRIM33, UBA52, UBB, UBC, UBE2D1, UBE2D3, USP9X
473	Tumour-Promoting Inflammation	Downregulation Of TGF Beta Receptor Signaling	reactome	BAMBI, MTMR4, NEDD4L, PMEPA1, PPP1CA, PPP1CB, PPP1CC, PPP1R15A, RPS27A, SMAD2, SMAD3, SMAD7, SMURF1, SMURF2, STRAP, STUB1, TGFB1, TGFBR1, TGFBR2, UBA52, UBB, UBC, UCHL5, USP15, XPO1, ZFYVE9
682	Tumour-Promoting Inflammation	Gene Expression Of Smad6/7 By R Smad:smad4 ( TGF Beta Super Family Signaling Pathway(canonical) ) // Gene Expression Of Smad7 By R Smad:smad4 ( TGF Beta Super Family Signaling Pathway(canonical) )	inoh	SMAD1, SMAD2, SMAD3, SMAD4, SMAD5, SMAD6, SMAD7, SMAD9
792	Tumour-Promoting Inflammation	IFN Alpha Signaling Pathway((JAK1 TYK2 STAT1 STAT2) ( IFN Alpha Signaling(JAK1 TYK2 STAT1 STAT2 STAT3) ) // IFN Alpha Signaling Pathway(JAK1 TYK2 STAT1 STAT3) ( IFN Alpha Signaling(JAK1 TYK2 STAT1 STAT2 STAT3) ) // IFN Alpha Signaling Pathway(JAK1 TYK2 STAT1) ( IFN Alpha Signaling(JAK1 TYK2 STAT1 STAT2 STAT3) ) // IFN Alpha Signaling Pathway(JAK1 TYK2 STAT3) ( IFN Alpha Signaling(JAK1 TYK2 STAT1 …	reactome	IFNA1, IFNA10, IFNA13, IFNA14, IFNA16, IFNA17, IFNA2, IFNA21, IFNA4, IFNA5, IFNA6, IFNA7, IFNA8, IFNAR1, IFNAR2, IRF9, JAK1, STAT1, STAT2, STAT3, TYK2
794	Tumour-Promoting Inflammation	IFN Gamma Pathway	wikipathways	AKT1, CALM1, CALM2, CALM3, CAMK2A, CAMK2B, CAMK2D, CAMK2G, CASP1, CBL, CEBPB, CREBBP, CRKL, DAPK1, EP300, IFNG, IFNGR1, IL1B, IRF1, IRF9, JAK1, JAK2, MAP2K1, MAP3K1, MAP3K11, MAPK1, MAPK3, MTOR, PIAS1, PIAS4, PIK3CA, PIK3R1, PRKCD, PTGES2, PTPN11, PTPN2, RAP1A, RAP1B, RAPGEF1, SMAD7, SOCS1, STAT1, STAT3
793	Tumour-Promoting Inflammation	IFN Gamma Signaling Pathway(JAK1 JAK2 STAT1) ( IFN Gamma Signaling(JAK1 JAK2 STAT1) )	netpath	IFNG, IFNGR1, IFNGR2, JAK1, JAK2, STAT1
815	Tumour-Promoting Inflammation	IL 6 Type Cytokine Receptor Ligand Interactions	inoh	CLCF1, CNTF, CNTFR, CRLF1, CTF1, EBI3, IL11, IL11RA, IL12A, IL12RB2, IL27, IL27RA, IL6ST, JAK1, JAK2, LIF, LIFR, OSM, OSMR, TYK2
859	Tumour-Promoting Inflammation	Inflammation Mediated By Chemokine And Cytokine Signaling Pathway	reactome	ACTA1, ACTA2, ACTB, ACTBL2, ACTC1, ACTG1, ACTG2, ADCY2, ADCY5, ADCY6, AKT1, AKT2, AKT3, ALOX12, ALOX15, ALOX5AP, ARPC1A, ARPC1B, ARPC2, ARPC3, ARPC4, ARPC5, ARPC5L, C5AR1, CAMK2A, CAMK2D, CASK, CCL11, CCL13, CCL18, CCL2, CCL20, CCL21, CCL22, CCL26, CCL27, CCL3, CCL3L1, CCL3L3, CCL4, CCL4L1, CCL4L2, CCL5, CCL7, CCL8, CCR1, CCR2, CCR3, CCR4, CCR5, CCR6, CCR7, CCR8, CCR9, CCRL2, CDC42, CHUK, COL12A1…
891	Tumour-Promoting Inflammation	Interferon Alpha/beta Signaling	pid	ADAR, BST2, EGR1, GBP2, HLA-A, HLA-B, HLA-C, HLA-E, HLA-F, HLA-G, HLA-H, IFI27, IFI35, IFI6, IFIT1, IFIT2, IFIT3, IFITM1, IFITM2, IFITM3, IFNA1, IFNA10, IFNA13, IFNA14, IFNA16, IFNA17, IFNA2, IFNA21, IFNA4, IFNA5, IFNA6, IFNA7, IFNA8, IFNAR1, IFNAR2, IFNB1, IP6K2, IRF1, IRF2, IRF3, IRF4, IRF5, IRF6, IRF7, IRF8, IRF9, ISG15, ISG20, JAK1, MX1, MX2, OAS1, OAS2, OAS3, OASL, PSMB8, PTPN11, PTPN6, RNAS…
892	Tumour-Promoting Inflammation	Interferon Gamma Signaling	reactome	B2M, CAMK2A, CAMK2B, CAMK2D, CAMK2G, CD44, CIITA, FCGR1A, FCGR1B, GBP1, GBP2, GBP3, GBP4, GBP5, GBP6, GBP7, HLA-A, HLA-B, HLA-C, HLA-DPA1, HLA-DPB1, HLA-DQA1, HLA-DQA2, HLA-DQB1, HLA-DQB2, HLA-DRA, HLA-DRB1, HLA-DRB3, HLA-DRB4, HLA-DRB5, HLA-E, HLA-F, HLA-G, HLA-H, ICAM1, IFI30, IFNG, IFNGR1, IFNGR2, IRF1, IRF2, IRF3, IRF4, IRF5, IRF6, IRF7, IRF8, IRF9, JAK1, JAK2, MID1, MT2A, NCAM1, OAS1, OAS2, …
893	Tumour-Promoting Inflammation	Interferon Gamma Signaling Pathway	reactome	CISH, IFNG, IFNGR1, IFNGR2, JAK1, JAK2, MAPK1, MAPK10, MAPK11, MAPK12, MAPK13, MAPK14, MAPK15, MAPK3, MAPK8, MAPK9, PIAS1, PIAS2, PIAS3, PIAS4, PTPN6, SOCS2, SOCS3, SOCS4, SOCS5, SOCS6, SOCS7, SPDYE7P, STAT1
845	Tumour-Promoting Inflammation	IRF3 Mediated Activation Of Type 1 IFN	reactome	DTX4, IRF3, NLRP4, TBK1, TMEM173, ZBP1
846	Tumour-Promoting Inflammation	IRF3 Mediated Induction Of Type I IFN	reactome	DDX41, DTX4, IFI16, IRF3, MRE11A, NLRP4, PRKDC, TBK1, TMEM173, TREX1, XRCC5, XRCC6, ZBP1
927	Tumour-Promoting Inflammation	JNK Cascade ( TGF Beta Signaling(through TAK1) )	inoh	JUN, MAP2K4, MAP3K7, MAPK10, MAPK8, MAPK9
949	Tumour-Promoting Inflammation	LRR FLII Interacting Protein 1 (LRRFIP1) Activates Type I IFN Production	pid	CREBBP, CTNNB1, EP300, IRF3, LRRFIP1
1081	Tumour-Promoting Inflammation	Negative Feedback Regulation Pathway Of TGF Beta Superfamily Signaling By (binding Of Smad6/7 And TGF Beta Receptor I) ( TGF Beta Super Family Signaling Pathway(canonical) )	reactome	ACVR1, ACVR1B, ACVRL1, BMPR1A, BMPR1B, SMAD6, SMAD7, TGFBR1
1084	Tumour-Promoting Inflammation	Negative Regulation Of (nuclear Import Of R Smad:smad4) In TGF Beta Super Family Signaling Pathway ( TGF Beta Super Family Signaling Pathway(canonical) )	reactome	MAPK1, MAPK10, MAPK11, MAPK12, MAPK13, MAPK14, MAPK3, MAPK7, MAPK8, MAPK9, SMAD1
1085	Tumour-Promoting Inflammation	Negative Regulation Of (transcription By R Smad:smad4) In TGF Beta Super Family Signaling Pathway ( TGF Beta Super Family Signaling Pathway(canonical) )	reactome	HDAC1, HDAC2, HDAC3, HDAC4, HDAC5, HDAC6, HDAC7, HDAC8, HDAC9, SKI, SKIL, SMAD1, SMAD2, SMAD3, SMAD4, SMAD5, SMAD9, TLE1, TLE2, TLE3, TLE4
1834	Tumour-Promoting Inflammation	P38 Cascade ( BMP2 Signaling(through TAK1) ) // P38 Cascade ( TGF Beta Signaling(through TAK1) ) // P38 Cascade ( Toll Like Receptor Signaling Pathway (p38 Cascade) )	humancyc	ATF2, MAP2K3, MAP2K6, MAP3K7, MAPK11, MAPK12, MAPK13, MAPK14
1362	Tumour-Promoting Inflammation	Regulation Of Cytoplasmic And Nuclear SMAD2/3 Signaling	reactome	CALM1, CALM2, CALM3, CTDSP1, CTDSP2, CTDSPL, KPNA2, KPNB1, MAP3K1, MAPK1, MAPK3, NUP153, NUP214, PIAS4, PPM1A, SMAD2, SMAD3, SMAD4, TGFBRAP1, UBE2I
1344	Tumour-Promoting Inflammation	Regulation Of IFNA Signaling	wikipathways	IFNA1, IFNA10, IFNA13, IFNA14, IFNA16, IFNA17, IFNA2, IFNA21, IFNA4, IFNA5, IFNA6, IFNA7, IFNA8, IFNAR1, IFNAR2, IFNB1, JAK1, PTPN1, PTPN11, PTPN6, SOCS1, SOCS3, STAT1, STAT2, TYK2, USP18
1345	Tumour-Promoting Inflammation	Regulation Of IFNG Signaling	pid	IFNG, IFNGR1, IFNGR2, JAK1, JAK2, PIAS1, PTPN1, PTPN11, PTPN2, PTPN6, SOCS1, SOCS3, STAT1, SUMO1
1373	Tumour-Promoting Inflammation	Regulation Of Nuclear SMAD2/3 Signaling	reactome	AKT1, AR, ATF2, ATF3, CBFB, CDK2, CDK4, CDKN1A, CDKN2B, CEBPB, CITED1, COL1A2, CREB1, CREBBP, CTBP1, DCP1A, DLX1, E2F4, E2F5, EP300, ESR1, FOS, FOXG1, FOXH1, FOXO1, FOXO3, FOXO4, GATA3, GSC, HDAC1, HDAC2, HNF4A, HSPA8, IFNB1, IGHA1, IL10, IL5, IRF7, ITGB5, JUN, KAT2A, KAT2B, LAMC1, MAX, MED15, MEF2C, MYC, MYOD1, NCOA1, NCOA2, NCOR1, NKX2-5, NR3C1, PIAS3, PIAS4, RBBP4, RBBP7, RBL1, RUNX1, RUNX2, R…
1299	Tumour-Promoting Inflammation	RIG I/MDA5 Mediated Induction Of IFN Alpha/beta Pathways	reactome	DDX58, DHX58, HERC5, IFIH1, ISG15, MAVS, NLRC5, NLRX1, RNF135, TKFC, TRIM25, UBA7, UBE2L6
1418	Tumour-Promoting Inflammation	SMAD2/3 MH2 Domain Mutants In Cancer // SMAD2/3 Phosphorylation Motif Mutants In Cancer // TGFBR1 KD Mutants In Cancer	reactome	FKBP1A, SMAD2, SMAD3, SMAD4, TGFB1, TGFBR1, TGFBR2, ZFYVE9
1419	Tumour-Promoting Inflammation	SMAD2/SMAD3:SMAD4 Heterotrimer Regulates Transcription	reactome	ATP1B4, CCNC, CCNK, CCNT1, CCNT2, CDK8, CDK9, CDKN2B, E2F4, E2F5, HDAC1, JUNB, MEN1, MYC, RBL1, RNF111, RPS27A, SERPINE1, SMAD2, SMAD3, SMAD4, SMAD7, SNW1, SP1, TFDP1, TFDP2, TGIF1, TGIF2, UBA52, UBB, UBC, WWTR1
1499	Tumour-Promoting Inflammation	SnoN Degradation Signaling ( TGF Beta Super Family Signaling Pathway(canonical) ) // TGF Beta Receptor Complex Degradation Signaling ( TGF Beta Super Family Signaling Pathway(canonical) ) // TGF Beta Receptor I Degradation Signaling ( TGF Beta Super Family Signaling Pathway(canonical) )	inoh	ACVR1, ACVR1B, ACVR2A, ACVR2B, ACVRL1, AMHR2, BMPR1A, BMPR1B, BMPR2, PSMA1, PSMA2, PSMA3, PSMA4, PSMA5, PSMA6, PSMA7, PSMB1, PSMB10, PSMB2, PSMB3, PSMB4, PSMB5, PSMB6, PSMB7, PSMB8, PSMB9, PSMC1, PSMC2, PSMC3, PSMC4, PSMC5, PSMD1, PSMD10, PSMD11, PSMD12, PSMD13, PSMD2, PSMD3, PSMD4, PSMD5, PSMD6, PSMD7, PSMD8, PSMD9, SKIL, SMAD2, SMAD7, SMURF1, SMURF2, TGFBR1, TGFBR2
1582	Tumour-Promoting Inflammation	TGF Beta Receptor	pid	ACVRL1, AKT1, ANAPC1, ANAPC10, ANAPC2, ANAPC4, ANAPC5, ANAPC7, AP2B1, AR, ARRB2, ATF2, ATF3, AXIN1, AXIN2, BCAR1, BRCA1, BTRC, CAMK2A, CAMK2B, CAMK2D, CAMK2G, CAV1, CCNB2, CCND1, CCNE1, CD44, CDC16, CDC23, CDC25A, CDC27, CDK1, CDK2, CDK4, CDK6, CDKN1A, CHUK, CITED1, COPS5, CREBBP, CRK, CSNK1G2, CTCF, CTNNA1, CTNNA2, CTNNB1, CUL1, DAB2, DAXX, DCP1A, DDX5, DVL1, DYNC1I1, DYNLRB1, DYNLRB2, E2F4, E2F…
1577	Tumour-Promoting Inflammation	TGF Beta Receptor Signaling	reactome	ARRB2, AXIN1, BAMBI, CAMK2A, CAV1, CTGF, CTNNB1, DAB2, DACT2, DAXX, DYNLRB1, EIF2A, FKBP1A, GRB2, ITCH, MAP3K7, NEDD4L, OCLN, PARD6A, PDPK1, PML, PPP1CA, PPP1R15A, PPP2CA, PPP2CB, PPP2R2A, RNF111, RPS6KB1, SHC1, SMAD2, SMAD3, SMAD4, SMAD7, SMURF1, SMURF2, SOS1, SPTBN1, STRAP, TAB1, TAB2, TFAP2B, TGFB1, TGFB3, TGFBR1, TGFBR2, TGFBR3, TGFBRAP1, WWP1, XIAP, YAP1, YWHAE, ZFYVE16, ZFYVE9
1578	Tumour-Promoting Inflammation	TGF Beta Receptor Signaling Activates SMADs	humancyc // panther	CBL, FKBP1A, FURIN, NEDD8, SMAD2, SMAD3, SMAD4, TGFB1, TGFBR1, TGFBR2, UBE2M, ZFYVE9
1579	Tumour-Promoting Inflammation	TGF Beta Receptor Signaling In EMT (epithelial To Mesenchymal Transition)	reactome	ARHGEF18, CGN, F11R, FKBP1A, PARD3, PARD6A, PRKCZ, RHOA, RPS27A, SMURF1, TGFB1, TGFBR1, TGFBR2, UBA52, UBB, UBC
1576	Tumour-Promoting Inflammation	TGF Beta Signaling Pathway(through TAK1) ( TGF Beta Signaling(through TAK1) )	wikipathways	MAP3K7, TAB1, TGFB1, TGFB2, TGFB3, TGFBR1, TGFBR2, XIAP
1580	Tumour-Promoting Inflammation	TGF Beta Super Family Signaling Pathway(canonical) ( TGF Beta BMP Diagram(MolecularVariation) )	netpath	ACVR1, ACVR1B, ACVR2A, ACVR2B, ACVRL1, AMHR2, BMP10, BMP15, BMP2, BMP3, BMP4, BMP5, BMP6, BMP7, BMP8B, BMPR1A, BMPR1B, BMPR2, CREBBP, EP300, GDF10, GDF11, GDF2, GDF3, GDF5, GDF6, GDF7, GDF9, INHA, INHBA, INHBB, INHBC, INHBE, MAML1, MAML2, MAML3, MSTN, NODAL, SMAD1, SMAD2, SMAD3, SMAD4, SMAD5, SMAD9, SMARCA4, TGFB1, TGFB2, TGFB3, TGFBR1, TGFBR2, WT1
1581	Tumour-Promoting Inflammation	TGFBR1 LBD Mutants In Cancer // TGFBR2 Kinase Domain Mutants In Cancer	pid	FKBP1A, TGFB1, TGFBR1, TGFBR2
1605	Tumour-Promoting Inflammation	TRAF6 Mediated Induction Of Proinflammatory Cytokines	reactome	RPS27A, TRAF6, UBA52, UBB, UBC
1691	Tumour-Promoting Inflammation	Type II Interferon Signaling	smpdb	HIST1H4A, HIST1H4B, HIST1H4C, HIST1H4D, HIST1H4E, HIST1H4F, HIST1H4H, HIST1H4I, HIST1H4J, HIST1H4K, HIST1H4L, HIST2H4A, HIST2H4B, HIST4H4, ICAM1, IFI6, IFNB1, IFNGR1, IRF1, IRF8, PSMB9, PTPN11, STAT2
90	Activating Invasion and Metastasis	Activation Of Matrix Metalloproteinases	reactome	CMA1, COL18A1, CTRB1, CTRB2, CTSG, CTSK, CTSV, ELANE, FURIN, KLK2, KLKB1, MMP1, MMP10, MMP11, MMP13, MMP14, MMP15, MMP16, MMP17, MMP2, MMP24, MMP25, MMP3, MMP7, MMP8, MMP9, PLG, PRSS1, PRSS2, TIMP1, TIMP2, TPSAB1
180	Activating Invasion and Metastasis	Arf6 Downstream Pathway	pid	ARF1, ARF6, KALRN, MAPK1, MAPK3, NME1, PIP5K1A, PLAUR, PLD1, PLD2, RAB11A, RAB11FIP3, RAC1, RHOA, TIAM1
276	Activating Invasion and Metastasis	CDC42 Signaling Events	inoh	ACTR2, ACTR3, APC, ARHGDIA, ARHGEF6, ARHGEF7, ARPC1B, ARPC2, ARPC3, ARPC4, ARPC5, ATF2, BAIAP2, BCAR1, BRAF, CBL, CDC42, CDC42BPA, CDH1, CFL1, CTNNA1, CTNNB1, DIAPH3, DLG1, ENAH, EPS8, EXOC7, F2RL2, GSK3B, HES5, HRAS, IQGAP1, IQGAP3, JUN, LIMK1, LIMK2, MAP2K3, MAP2K4, MAP2K6, MAP2K7, MAP3K1, MAP3K11, MAPK1, MAPK14, MAPK3, MAPK8, MAPK9, MTOR, MYL2, PAK1, PAK2, PAK4, PARD6A, PAX6, PIK3CA, PIK3R1, P…
369	Activating Invasion and Metastasis	Collagen Degradation	reactome	ADAM10, ADAM17, ADAM9, COL12A1, COL13A1, COL14A1, COL15A1, COL16A1, COL17A1, COL18A1, COL19A1, COL23A1, COL25A1, COL26A1, COL9A1, COL9A2, COL9A3, CTSB, CTSD, CTSK, CTSL, ELANE, FURIN, MMP1, MMP10, MMP11, MMP12, MMP13, MMP14, MMP15, MMP19, MMP2, MMP20, MMP3, MMP7, MMP8, MMP9, PHYKPL, PRSS2
448	Activating Invasion and Metastasis	Degradation Of The Extracellular Matrix	pid	A2M, ACAN, ADAM10, ADAM15, ADAM8, ADAMTS1, ADAMTS16, ADAMTS18, ADAMTS4, ADAMTS5, ADAMTS8, ADAMTS9, BCAN, BMP1, BSG, CAPN1, CAPN10, CAPN11, CAPN12, CAPN13, CAPN14, CAPN15, CAPN2, CAPN3, CAPN5, CAPN6, CAPN7, CAPN8, CAPN9, CAPNS1, CAPNS2, CASP3, CAST, CD44, CDH1, CTSG, CTSK, CTSL, CTSS, CTSV, DCN, ELANE, HSPG2, HTRA1, KLK7, LAMA3, LAMA5, LAMB1, LAMB3, LAMC1, LAMC2, MMP1, MMP10, MMP11, MMP12, MMP13, …
486	Activating Invasion and Metastasis	E Cadherin Signaling In Keratinocytes	kegg	AJUBA, AKT1, AKT2, CASR, CDH1, CTNNA1, CTNNB1, CTNND1, EGFR, FMN1, FYN, JUP, PIK3CA, PIK3R1, PIP5K1A, PLCG1, RAC1, RHOA, SRC, VASP, ZYX
487	Activating Invasion and Metastasis	E Cadherin Signaling In The Nascent Adherens Junction	reactome	ABI1, AKT1, AP1M1, ARF6, CA2, CCND1, CDC42, CDH1, CRK, CTNNA1, CTNNB1, CTNND1, CTTN, CYFIP2, DLG1, ENAH, IQGAP1, ITGAE, ITGB7, JUP, KLHL20, MLLT4, NCKAP1, NME1, PIK3CA, PIK3R1, PIP5K1C, RAC1, RAP1A, RAP1B, RAPGEF1, RHOA, SRC, TIAM1, TJP1, VAV2, WASF2
500	Activating Invasion and Metastasis	EPH Ephrin Mediated Repulsion Of Cells	pid	ADAM10, AP2A1, AP2A2, AP2B1, AP2M1, AP2S1, APH1A, APH1B, CLTA, CLTB, CLTC, CLTCL1, DNM1, EFNA1, EFNA2, EFNA3, EFNA4, EFNA5, EFNB1, EFNB2, EFNB3, EPHA1, EPHA10, EPHA2, EPHA3, EPHA4, EPHA5, EPHA6, EPHA7, EPHA8, EPHB1, EPHB2, EPHB3, EPHB4, EPHB6, FYN, LYN, MMP2, MMP9, NCSTN, PSEN2, PSENEN, RAC1, SRC, TIAM1, VAV2, VAV3, YES1
503	Activating Invasion and Metastasis	EPHA2 Forward Signaling	reactome	ACP1, ARHGAP35, BCAR1, CBL, EFNA1, EPHA2, GRB2, INPPL1, PAK1, PIK3CA, PIK3R1, PTK2, RAC1, RHOA, SHC1, SRC, TIAM1, VAV2, VAV3
505	Activating Invasion and Metastasis	EPHB Mediated Forward Signaling	reactome	ACTB, ACTG1, ACTR2, ACTR3, ARHGEF28, ARPC1A, ARPC1B, ARPC2, ARPC3, ARPC4, ARPC5, CDC42, CFL1, EFNB1, EFNB2, EFNB3, EPHB1, EPHB2, EPHB3, EPHB4, EPHB6, FYN, GRIN1, GRIN2B, HRAS, ITSN1, KALRN, LIMK1, LIMK2, LYN, PAK1, PTK2, RAC1, RASA1, RHOA, ROCK1, ROCK2, SDC2, SRC, TIAM1, WASL, YES1
534	Activating Invasion and Metastasis	Ephrin B Reverse Signaling	pid	BLK, DNM1, EFNB1, EFNB2, EPHB1, EPHB2, EPHB4, FGR, FYN, HCK, ITGA2B, ITGB3, LCK, LYN, MAP2K4, MAP3K7, MAPK8, NCK2, PIK3CA, PIK3R1, PTPN13, RAC1, RGS3, SRC, TIAM1, YES1
633	Activating Invasion and Metastasis	G Alpha (12/13) Signalling Events	reactome	ABR, ADRA1A, ADRA1B, ADRA1D, AKAP13, ARHGAP4, ARHGEF1, ARHGEF11, ARHGEF12, ARHGEF16, ARHGEF17, ARHGEF18, ARHGEF2, ARHGEF3, ARHGEF4, ARHGEF6, ARHGEF7, ARHGEF9, CDC42, ECT2, FGD1, FGD2, FGD3, FGD4, GNA12, GNA13, GNB1, GNB2, GNB3, GNB4, GNB5, GNG10, GNG11, GNG12, GNG13, GNG2, GNG3, GNG4, GNG5, GNG7, GNG8, GNGT1, GNGT2, ITSN1, KALRN, MCF2, MCF2L, NET1, NGEF, OBSCN, PIK3CA, PIK3R1, PIK3R2, PIK3R3, PLE…
738	Activating Invasion and Metastasis	HDACs Deacetylate Histones	inoh	ARID4A, ARID4B, BRMS1, CHD3, CHD4, GATAD2A, GATAD2B, GPS2, HDAC1, HDAC10, HDAC2, HDAC3, HDAC8, HIST1H2AA, HIST1H2AB, HIST1H2AC, HIST1H2AD, HIST1H2AE, HIST1H2AG, HIST1H2AH, HIST1H2AI, HIST1H2AJ, HIST1H2AK, HIST1H2AL, HIST1H2AM, HIST1H2BA, HIST1H2BB, HIST1H2BC, HIST1H2BD, HIST1H2BE, HIST1H2BF, HIST1H2BG, HIST1H2BH, HIST1H2BI, HIST1H2BJ, HIST1H2BK, HIST1H2BL, HIST1H2BM, HIST1H2BN, HIST1H2BO, HIST1H3…
757	Activating Invasion and Metastasis	Hedgehog Signaling Events Mediated By Gli Proteins	reactome	AKT1, ARRB2, BTRC, CREBBP, CSNK1A1, CSNK1D, CSNK1E, CSNK1G1, CSNK1G2, CSNK1G3, FBXW11, FOXA2, GLI1, GLI2, GLI3, GNAI1, GNAI2, GNAI3, GNAO1, GNAZ, GNB1, GNG2, GSK3B, HDAC1, HDAC2, IFT172, IFT88, KIF3A, KITLG, LGALS3, MAP2K1, MTSS1, PIAS1, PRKACA, PRKCD, PTCH1, RAB23, RBBP4, RBBP7, SAP18, SAP30, SHH, SIN3A, SIN3B, SMO, SPOP, STK36, SUFU, XPO1
887	Activating Invasion and Metastasis	Integrin Linked Kinase Signaling	pid	ACTN1, AKT1, ARHGEF6, ARHGEF7, AURKA, CCND1, CDC37, CDC42, CKAP5, CREB1, CTNNB1, DIAPH1, ELMO2, GIT2, GSK3B, HSP90AA1, ILK, ILKAP, IQGAP1, JUN, LEF1, LIMS1, LIMS2, MYL9, NACA, NCK2, PARP1, PARVA, PARVB, PARVG, PPP1R12A, PPP1R14A, PPP1R14B, PPP1R14C, PXN, RAC1, RHOG, RICTOR, RUVBL1, RUVBL2, SNAI1, TACC3, TNS1, XPO1, ZEB1, ZYX
947	Activating Invasion and Metastasis	LPA Receptor Mediated Events	reactome	ADCY1, ADCY2, ADCY3, ADCY4, ADCY5, ADCY6, ADCY7, ADCY8, ADCY9, ADRA1B, AKT1, ARHGEF1, BCAR1, CASP3, CRK, CXCL8, EGFR, FOS, GAB1, GNA11, GNA12, GNA13, GNA14, GNA15, GNAI1, GNAI2, GNAI3, GNAO1, GNAQ, GNAZ, GNB1, GNG2, GSK3B, HBEGF, HRAS, JUN, LPAR1, LPAR2, LPAR3, LPAR4, LYN, MAPT, MMP2, MMP9, NFKB1, NFKBIA, PIK3CB, PIK3R1, PLCB3, PLCG1, PLD2, PRKCD, PRKCE, PRKD1, PRRT2, PTK2, PTK2B, PXN, RAC1, RELA…
1104	Activating Invasion and Metastasis	Neurotrophic Factor Mediated Trk Receptor Signaling	reactome	ABL1, ACKR1, ARHGAP32, BDNF, CCND1, CDC42, CRK, CRKL, DNAJA3, DNM1, DOCK1, DYNLT1, EHD4, ELMO1, FAIM, FRS2, FRS3, GAB1, GAB2, GIPC1, GRB2, HRAS, KIDINS220, KRAS, MAGED1, MAP2K1, MAPK1, MAPK3, MATK, MCF2L, NEDD4L, NGF, NGFR, NRAS, NTF3, NTF4, NTRK1, NTRK2, NTRK3, PIK3CA, PIK3R1, PLCG1, PRKCI, PRKCZ, PTPN11, RAC1, RAP1A, RAP1B, RAPGEF1, RASA1, RASGRF1, RGS19, RHOA, RHOG, RIT1, RIT2, SHC1, SHC2, SHC…
1071	Activating Invasion and Metastasis	NRAGE Signals Death Through JNK	reactome	AATF, ABR, AKAP13, ARHGAP4, ARHGEF11, ARHGEF12, ARHGEF16, ARHGEF17, ARHGEF18, ARHGEF2, ARHGEF3, ARHGEF4, ARHGEF6, ARHGEF7, ARHGEF9, BAD, BCL2L11, ECT2, FGD1, FGD2, FGD3, FGD4, ITSN1, KALRN, MAGED1, MAPK8, MCF2, MCF2L, NET1, NGEF, NGF, NGFR, OBSCN, PLEKHG2, PLEKHG5, RAC1, RASGRF2, SOS1, SOS2, TIAM1, TIAM2, TRIO, VAV1, VAV2, VAV3
1159	Activating Invasion and Metastasis	PDGF Pathway	pid	ARFIP2, CDC42, CHUK, MT-CO2, PAK1, PIK3R1, RAC1, RAF1, RHOA, SRC, STAT1, STAT3, TIAM1, VAV1, VAV2, WASL
1252	Activating Invasion and Metastasis	Posttranslational Regulation Of Adherens Junction Stability And Dissassembly	pid	ABL1, ADAM10, ARF6, BDNF, CABLES1, CASP3, CBLL1, CDC42, CDH1, CDH2, CREBBP, CTNNA1, CTNNB1, CTNND1, DNM2, DSP, EGF, EGFR, FER, FYN, GDNF, GFRA1, GNA12, GNA13, HGS, HRAS, IGF1R, IGF2, IQGAP1, JUP, MEP1B, MET, MMP3, MMP7, NME1, NTRK2, NUTF2, PTPN1, PTPN6, RAB5A, RAB7A, RAC1, RET, RIN2, ROBO1, SLIT1, SNX1, SRC, TIAM1, ZBTB33
1323	Activating Invasion and Metastasis	Ras Pathway	pid	AKT1, AKT3, ARAF, ATF2, BRAF, CDC42, ELK1, ETS1, EXOC2, GSK3A, GSK3B, HRAS, JUN, KRAS, MAP2K1, MAP2K2, MAP2K3, MAP2K4, MAP2K6, MAP2K7, MAP3K1, MAP3K4, MAP3K7CL, MAPK1, MAPK10, MAPK11, MAPK12, MAPK13, MAPK14, MAPK3, MAPK8, MAPK9, MAPKAPK2, MAPKAPK3, NRAS, PAK1, PAK2, PAK3, PDPK1, PIK3C3, PIK3CA, PIK3CB, PIK3CD, PIK3CG, PLD1, PLD2, RAC1, RAC2, RAC3, RAF1, RALA, RALB, RALGDS, RGL1, RGL2, RHOA, RHOB,…
1349	Activating Invasion and Metastasis	Regulation Of RAC1 Activity	reactome	ABI1, ABR, ARHGAP1, ARHGAP17, ARHGAP32, ARHGAP9, ARHGDIA, ARHGEF2, ARHGEF25, ARHGEF6, ARHGEF7, BCR, CHN1, CHN2, DEF6, DOCK1, DOCK2, DOCK6, ELMO1, EPS8, KALRN, MCF2, NGEF, PREX1, PREX2, RAC1, RACGAP1, RALBP1, RAP1GDS1, RASGRF1, RASGRF2, SOS1, SPATA13, TIAM1, TIAM2, TRIO, VAV1, VAV2, VAV3
1396	Activating Invasion and Metastasis	Rho GTPase Cycle	reactome	A2M, ABR, AKAP13, ARAP1, ARAP2, ARAP3, ARHGAP1, ARHGAP10, ARHGAP11A, ARHGAP11B, ARHGAP12, ARHGAP15, ARHGAP17, ARHGAP18, ARHGAP19, ARHGAP20, ARHGAP22, ARHGAP23, ARHGAP24, ARHGAP25, ARHGAP26, ARHGAP28, ARHGAP29, ARHGAP30, ARHGAP31, ARHGAP32, ARHGAP33, ARHGAP35, ARHGAP36, ARHGAP39, ARHGAP4, ARHGAP40, ARHGAP44, ARHGAP5, ARHGAP6, ARHGAP8, ARHGAP9, ARHGDIA, ARHGDIB, ARHGDIG, ARHGEF11, ARHGEF12, ARHGEF1…
1479	Activating Invasion and Metastasis	Signaling Events Mediated By Hepatocyte Growth Factor Receptor (c Met)	reactome	AKT1, AKT1S1, AKT2, APC, ARF6, ARHGEF4, BAD, BCAR1, CBL, CDC42, CDH1, CRK, CRKL, CTNNA1, CTNNB1, DEPTOR, EGR1, EIF4E, EIF4EBP1, EPS15, ETS1, F2RL2, GAB1, GAB2, GRB2, HGF, HGS, HRAS, INPP5D, INPPL1, JUN, KPNB1, MAP2K1, MAP2K2, MAP2K4, MAP3K1, MAPK1, MAPK3, MAPK8, MET, MLST8, MTOR, MUC20, NCK1, NCK2, NUMB, PAK1, PAK2, PAK4, PARD6A, PDPK1, PIK3CA, PIK3R1, PLCG1, PRKCI, PRKCZ, PTK2, PTPN1, PTPN11, PT…
1513	Activating Invasion and Metastasis	Stabilization And Expansion Of The E Cadherin Adherens Junction	smpdb	ABI1, ACTN1, AQP3, AQP5, ARF6, CAMSAP3, CDH1, CTNNA1, CTNNB1, CTNND1, CYFIP2, DIAPH1, EFNA1, EGF, EGFR, ENAH, EPHA2, EXOC1, EXOC3, EXOC4, GIT1, HGF, IGF1, IGF1R, KIFC3, LIMA1, LPP, MET, MGAT3, MLLT4, MYL2, MYO6, NCK1, NCKAP1, PIP5K1C, PLEKHA7, PVRL2, RHOA, ROCK1, STX4, VASP, VCL, ZYX
1582	Activating Invasion and Metastasis	TGF Beta Receptor	pid	ACVRL1, AKT1, ANAPC1, ANAPC10, ANAPC2, ANAPC4, ANAPC5, ANAPC7, AP2B1, AR, ARRB2, ATF2, ATF3, AXIN1, AXIN2, BCAR1, BRCA1, BTRC, CAMK2A, CAMK2B, CAMK2D, CAMK2G, CAV1, CCNB2, CCND1, CCNE1, CD44, CDC16, CDC23, CDC25A, CDC27, CDK1, CDK2, CDK4, CDK6, CDKN1A, CHUK, CITED1, COPS5, CREBBP, CRK, CSNK1G2, CTCF, CTNNA1, CTNNA2, CTNNB1, CUL1, DAB2, DAXX, DCP1A, DDX5, DVL1, DYNC1I1, DYNLRB1, DYNLRB2, E2F4, E2F…
1579	Activating Invasion and Metastasis	TGF Beta Receptor Signaling In EMT (epithelial To Mesenchymal Transition)	reactome	ARHGEF18, CGN, F11R, FKBP1A, PARD3, PARD6A, PRKCZ, RHOA, RPS27A, SMURF1, TGFB1, TGFBR1, TGFBR2, UBA52, UBB, UBC
1717	Activating Invasion and Metastasis	Validated Targets Of C MYC Transcriptional Activation	panther	ACTL6A, BAX, BCAT1, BIRC5, BMI1, CAD, CCNB1, CCND2, CDC25A, CDCA7, CDK4, CREBBP, DDX18, DKC1, E2F3, EIF2S1, EIF4A1, EIF4E, EIF4G1, ENO1, EP300, FOSL1, GAPDH, GPAM, HMGA1, HSP90AA1, HSPA4, HSPD1, HUWE1, ID2, IREB2, KAT2A, KAT5, KIR3DL1, LDHA, LIN28B, MAX, MINA, MMP9, MTA1, MTDH, MYC, MYCT1, NBN, NCL, NDUFAF2, NME1, NME2, NPM1, ODC1, PDCD10, PEG10, PFKM, PIM1, PMAIP1, POLR3D, PRDX3, PTMA, RCC1, RPL…
201	Inducing Angiogenesis	[CGB Protein Results In Increased Activity Of LHCGR Protein] // [N (2 Cyclohexyloxy 4 Nitrophenyl)methanesulfonamide Results In Decreased Activity Of PTGS2 Protein] Inhibits The Reaction [CGB Protein Results In Increased Chemical Synthesis Of Dinoprost] // [N3 Cyclopropyl 7 ((4 (1 Methylethyl)phenyl)methyl) 7H Pyrrolo(3, 2 F)quinazoline 1,3 Diamine Binds To F2R Protein] Promotes The Reaction [CGB…	reactome	CGB3, CGB5, CGB7, CGB8, LHCGR, STAR
77	Inducing Angiogenesis	Activated NOTCH1 Transmits Signal To The Nucleus	reactome	ADAM10, ADAM17, APH1A, APH1B, ARRB1, ARRB2, CNTN1, DLK1, DLL1, DLL4, DNER, DTX1, DTX2, DTX4, ITCH, JAG1, JAG2, MIB1, MIB2, NCSTN, NEURL1, NEURL1B, NOTCH1, NUMB, PSEN2, PSENEN, RPS27A, UBA52, UBB, UBC
37	Inducing Angiogenesis	AKT(PKB) Activation Signaling ( IGF1 Signaling Pathway ) // AKT(PKB) Activation Signaling ( Insulin Receptor Signaling (D. Melanogaster) ) // AKT(PKB) Activation Signaling ( PDGF Signaling Pathway )	inoh	AKT1, AKT2, AKT3, PDPK1, PIK3CA, PIK3CB, PIK3CD
39	Inducing Angiogenesis	AKT(PKB) Bad Signaling ( EPO Signaling Pathway(JAK2 STAT1 STAT3 STAT5) ) // AKT(PKB) Bad Signaling ( IL 7 Signaling(JAK1 JAK3 STAT5) ) // Positive Regulation Of (Transcription Of SOCS By STAT Dimer) In JAK STAT Pathway ( JAK STAT Pathway And Regulation Pathway Diagram ) // VEGF Signaling Pathway ( VEGF Signaling Pathway )	inoh	ACVR1, ACVR1B, ACVR2A, ACVR2B, ACVRL1, ADRBK1, ADRBK2, AKT1, AKT2, AKT3, ALK, AMHR2, ARAF, BAD, BMPR1A, BMPR1B, BMPR2, BRAF, BTK, CAMK2A, CAMK2B, CAMK2D, CAMK2G, CCNH, CDC7, CDK1, CDK2, CDK3, CDK4, CDK5, CDK6, CDK7, CDK8, CDK9, CHUK, CSK, CSNK1A1, CSNK1D, CSNK1E, CSNK1G1, CSNK1G2, CSNK1G3, EGFR, FGFR1, FGFR2, FGFR3, FGFR4, FIGF, FLT1, FLT4, FYN, GFRA1, GRK4, GRK5, GRK6, GRK7, GSK3A, GSK3B, IGF1R,…
166	Inducing Angiogenesis	Angiogenesis	panther	AKT1, AKT2, AKT3, ANGPT1, ANGPT2, APC, APC2, ARAF, ARHGAP1, ARHGAP8, AXIN1, BIRC5, BRAF, CASP9, CRK, CRKL, CTNNB1, DLK1, DLL3, DLL4, DOK2, DVL1, DVL2, DVL3, EFNB1, EFNB2, EPHB1, EPHB2, EPHB3, ETS1, F2R, F3, F7, FGF1, FGFR1, FOS, FRS2, FZD1, FZD2, FZD3, FZD5, GRB14, GRB7, GSK3B, HIF1A, HRAS, HSPB1, JAG1, JAG2, JAK1, JUN, KDR, MAP2K1, MAP2K2, MAP2K4, MAP3K1, MAPK1, MAPK14, MAPK3, MAPK8, MAPKAPK2, M…
167	Inducing Angiogenesis	Angiopoietin Receptor Tie2 Mediated Signaling	pid	AGTR1, AKT1, ANGPT1, ANGPT2, ANGPT4, BMX, CDKN1A, CRK, DOK2, ELF1, ELF2, ELK1, ETS1, F2, FES, FGF2, FN1, FOXO1, FYN, GRB14, GRB2, GRB7, ITGA5, ITGB1, MAPK1, MAPK14, MAPK3, MAPK8, MMP2, NCK1, NFKB1, NOS3, PAK1, PIK3CA, PIK3R1, PLD2, PLG, PTK2, PTPN11, PXN, RAC1, RASA1, RELA, RPS6KB1, SHC1, STAT5A, STAT5B, TEK, TNF, TNIP2
315	Inducing Angiogenesis	Canonical Wnt Signaling Pathway	pid	APC, AXIN1, CAV1, CSNK1G1, CTNNB1, CUL3, DVL1, DVL2, DVL3, FZD5, GRK5, GSK3A, GSK3B, KLHL12, LRP6, NKD2, PI4K2A, PIP5K1B, PPP2R5A, RANBP3, WNT3A
381	Inducing Angiogenesis	Constitutive Signaling By NOTCH1 HD Domain Mutants	reactome	ADAM10, ADAM17, DLL1, DLL4, JAG1, JAG2, MIB1, MIB2, NEURL1, NEURL1B, NOTCH1, RPS27A, UBA52, UBB, UBC
382	Inducing Angiogenesis	Constitutive Signaling By NOTCH1 HD+PEST Domain Mutants // Constitutive Signaling By NOTCH1 PEST Domain Mutants	reactome	ADAM10, ADAM17, APH1A, APH1B, CCNC, CDK8, CREBBP, CUL1, DLL1, DLL4, EP300, FBXW7, HDAC1, HDAC10, HDAC11, HDAC2, HDAC3, HDAC4, HDAC5, HDAC6, HDAC7, HDAC8, HDAC9, HES1, HES5, HEY1, HEY2, HEYL, JAG1, JAG2, KAT2A, KAT2B, MAML1, MAML2, MAML3, MAMLD1, MIB1, MIB2, MYC, NCOR1, NCOR2, NCSTN, NEURL1, NEURL1B, NOTCH1, PSEN2, PSENEN, RBPJ, RBX1, RPS27A, SKP1, SNW1, TBL1X, TBL1XR1, UBA52, UBB, UBC
383	Inducing Angiogenesis	Constitutive Signaling By NOTCH1 T(7;9)(NOTCH1:M1580 K2555) Translocation Mutant	reactome	ADAM10, ADAM17, DLL1, DLL4, JAG1, JAG2, NOTCH1
514	Inducing Angiogenesis	ERK Cascade ( EGF Signaling Pathway Diagram ) // ERK Cascade ( HGF Signaling Pathway ) // ERK Cascade ( PDGF Signaling Pathway ) // ERK Cascade ( VEGF Signaling Pathway )	reactome	ELK1, MAP2K1, MAP2K2, MAPK1, MAPK3, RAF1
745	Inducing Angiogenesis	HIF 1 Alpha Transcription Factor Network	reactome	ABCB1, ABCG2, ADM, AKT1, ALDOA, ARNT, BHLHE40, BHLHE41, BNIP3, CA9, CITED2, COPS5, CP, CREB1, CREBBP, CXCL12, CXCR4, EDN1, EGLN1, EGLN3, ENG, ENO1, EP300, EPO, ETS1, FECH, FOS, FURIN, GATA2, GCK, HDAC7, HIF1A, HK1, HK2, HMOX1, HNF4A, ID2, IGFBP1, ITGB2, JUN, LDHA, LEP, MCL1, NCOA1, NCOA2, NDRG1, NOS2, NPM1, NT5E, PFKFB3, PFKL, PGK1, PGM1, PKM, PLIN2, RORA, SERPINE1, SLC2A1, SLC2A3, SMAD3, SMAD4, …
746	Inducing Angiogenesis	HIF 2 Alpha Transcription Factor Network	reactome	ABCG2, ADORA2A, APEX1, ARNT, BHLHE40, CITED2, CREBBP, EFNA1, EGLN1, EGLN2, EGLN3, EIF3E, ELK1, EP300, EPAS1, EPO, ETS1, FLT1, FXN, HIF1AN, KDR, MMP14, PGK1, POU5F1, SERPINE1, SIRT1, SLC11A2, SLC2A1, SP1, TCEB1, TCEB2, TWIST1, VEGFA, VHL
787	Inducing Angiogenesis	Hypoxia Response Via HIF Activation	reactome	AKT1, AKT2, AKT3, ARNT, CREBBP, EGLN1, EGLN2, EGLN3, GPR37, HIF1A, MTOR, PARK2, PTEN, TXN, TXN2, VHL
788	Inducing Angiogenesis	Hypoxic And Oxygen Homeostasis Regulation Of HIF 1 Alpha	reactome	ARNT, CDKN2A, COPS5, CUL2, EGLN1, EGLN2, EGLN3, HIF1A, HIF1AN, HIF3A, HSP90AA1, NAA10, OS9, RACK1, RBX1, TCEB1, TCEB2, TP53, VHL
888	Inducing Angiogenesis	Integrins In Angiogenesis	inoh	ADGRA2, AKT1, ANGPTL3, BCAR1, CASP8, CBL, CDKN1B, COL11A1, COL11A2, COL1A1, COL1A2, COL2A1, COL3A1, COL4A1, COL4A2, COL4A3, COL4A4, COL4A5, COL4A6, COL5A1, COL5A2, COL6A1, COL6A2, COL6A3, COL6A5, COL6A6, COL7A1, CSF1, CSF1R, EDIL3, F11R, FGF2, FN1, HSP90AA1, IGF1, IGF1R, ILK, IRS1, ITGAV, ITGB3, KDR, MAPK1, MAPK3, MFGE8, PI4KA, PI4KB, PIK3C2A, PIK3CA, PIK3R1, PTK2, PTK2B, PTPN11, PXN, RAC1, RHOA,…
925	Inducing Angiogenesis	JNK Cascade ( EGF Signaling Pathway Diagram ) // JNK Cascade ( PDGF Signaling Pathway )	panther	JUN, MAP2K4, MAP3K1, MAPK8
967	Inducing Angiogenesis	Loss Of Function Of FBXW7 In Cancer And NOTCH1 Signaling	kegg	CUL1, FBXW7, NOTCH1, RBX1, SKP1
1102	Inducing Angiogenesis	Neurophilin Interactions With VEGF And VEGFR	pid	FLT1, KDR, NRP1, NRP2
1118	Inducing Angiogenesis	Noncanonical Wnt Signaling Pathway	panther	ARRB2, CAMK2A, CDC42, CHD7, CSNK1A1, CTHRC1, DAAM1, DVL1, DVL2, DVL3, FLNA, FZD2, FZD5, FZD6, FZD7, MAP3K7, MAPK10, MAPK8, MAPK9, NFATC2, NLK, PPARG, PRKCZ, RAC1, RHOA, ROCK1, ROR2, SETDB1, TAB1, TAB2, WNT3A, WNT5A, YES1
1067	Inducing Angiogenesis	NOTCH1 Intracellular Domain Regulates Transcription	inoh	CCNC, CDK8, CREBBP, CUL1, EP300, FBXW7, HDAC1, HDAC10, HDAC11, HDAC2, HDAC3, HDAC4, HDAC5, HDAC6, HDAC7, HDAC8, HDAC9, HES1, HES5, HEY1, HEY2, HEYL, HIF1A, KAT2A, KAT2B, MAML1, MAML2, MAML3, MAMLD1, MYC, NCOR1, NCOR2, NOTCH1, RBPJ, RBX1, RPS27A, SKP1, SNW1, TBL1X, TBL1XR1, TLE1, TLE2, TLE3, TLE4, UBA52, UBB, UBC
1068	Inducing Angiogenesis	NOTCH2 Activation And Transmission Of Signal To The Nucleus	reactome	ADAM10, APH1A, APH1B, CNTN1, DLL1, DLL4, JAG1, JAG2, MDK, MIB1, MIB2, NCSTN, NEURL1, NEURL1B, NOTCH2, PSEN2, PSENEN, RPS27A, UBA52, UBB, UBC
1069	Inducing Angiogenesis	NOTCH2 Intracellular Domain Regulates Transcription	reactome	CREB1, EP300, FCER2, GZMB, HES1, HES5, MAML1, MAML2, MAML3, MAMLD1, NOTCH2, RBPJ
1149	Inducing Angiogenesis	Oxygen Dependent Proline Hydroxylation Of Hypoxia Inducible Factor Alpha	kegg	CUL2, EGLN1, EGLN2, EGLN3, EPAS1, HIF1A, HIF3A, RBX1, RPS27A, TCEB1, TCEB2, UBA52, UBB, UBC, UBE2D1, UBE2D2, UBE2D3, VHL
1159	Inducing Angiogenesis	PDGF Pathway	pid	ARFIP2, CDC42, CHUK, MT-CO2, PAK1, PIK3R1, RAC1, RAF1, RHOA, SRC, STAT1, STAT3, TIAM1, VAV1, VAV2, WASL
1160	Inducing Angiogenesis	PDGF Receptor Signaling Network	pid	PDGFA, PDGFB, PDGFC, PDGFD, PDGFRA, PDGFRB
1161	Inducing Angiogenesis	PDGF Signaling Pathway	reactome	AKT2, ARAF, ARHGAP1, ARHGAP10, ARHGAP12, ARHGAP15, ARHGAP26, ARHGAP4, ARHGAP42, ARHGAP5, ARHGAP6, ARHGAP8, ARHGAP9, BRAF, CHUK, EHF, ELF1, ELF2, ELF3, ELF4, ELF5, ELK1, ELK4, ERF, ERG, ETS1, ETV3, FEV, FLI1, FOS, GABPA, GSK3A, GSK3B, HRAS, IKBKB, ITPR1, ITPR2, ITPR3, JAK1, JAK2, JAK3, JUN, MAP2K1, MAP2K2, MAPK1, MAPK15, MAPK3, MAPK6, MAPK7, MAPK8, MAPKAPK2, MKNK1, MKNK2, MYC, MYCBP, NCK1, NCK2, N…
1162	Inducing Angiogenesis	PDGF Signaling Pathway ( PDGF Signaling Pathway )	reactome	GRB2, HRAS, KRAS, MAP3K1, NRAS, PDGFA, PDGFB, PDGFRA, PDGFRB, RAF1, SHC1, SHC2, SHC3, SOS1, SOS2
1163	Inducing Angiogenesis	PDGF Signaling Pathway (Mammal) ( PDGF Signaling Pathway )	reactome	ARHGEF6, CDC42, CRK, GRB2, HRAS, KRAS, MAP3K14, NCK1, NRAS, PAK1, PDGFA, PDGFB, PDGFRA, PDGFRB, PIK3CA, PIK3CB, PIK3CD, PIK3R1, PIK3R2, PTPN11, RAF1, RASA1, SHC1, SHC2, SHC3, SOS1, SOS2, STAT5A, STAT5B
1164	Inducing Angiogenesis	PDGFR Alpha Signaling Pathway	wikipathways	CAV1, CAV3, CRK, CRKL, CSNK2A1, ELK1, FOS, GRB2, ITGAV, JAK1, JUN, PDGFRA, PIK3CA, PIK3R1, PLCG1, PRRT2, RAPGEF1, SHB, SHC1, SHF, SOS1, SRF
1165	Inducing Angiogenesis	PDGFR Beta Signaling Pathway	pid	ABI1, ABL1, ACTA2, ACTN4, ACTR2, ACTR3, ARAP1, ARHGAP35, ARHGDIA, ARPC1B, ARPC2, ARPC3, ARPC4, ARPC5, BAIAP2, BCAR1, BLK, BRAF, BRK1, CBL, CRK, CSK, CTTN, CYFIP2, DNM2, DOCK4, DOK1, EIF2AK2, ELK1, EPS8, FGR, FOS, FYN, GAB1, GRB10, GRB2, HCK, HRAS, IQGAP1, ITGAV, ITGB3, JAK2, JUN, JUND, KRAS, KSR1, LCK, LRP1, LYN, MAP2K1, MAP2K2, MAP2K4, MAP2K7, MAPK1, MAPK10, MAPK3, MAPK8, MAPK9, MLLT4, MYC, MYOC…
1253	Inducing Angiogenesis	Pre NOTCH Processing In Golgi	reactome	ATP2A1, ATP2A2, ATP2A3, B4GALT1, FURIN, LFNG, MFNG, NOTCH1, NOTCH2, NOTCH3, NOTCH4, RAB6A, RFNG, SEL1L, ST3GAL3, ST3GAL4, ST3GAL6, TMED2
1254	Inducing Angiogenesis	Pre NOTCH Processing In The Endoplasmic Reticulum	kegg	NOTCH1, NOTCH2, NOTCH3, NOTCH4, POFUT1, POGLUT1
1255	Inducing Angiogenesis	Pre NOTCH Transcription And Translation	reactome	AGO1, AGO2, AGO3, AGO4, CCND1, CREBBP, E2F1, E2F3, EP300, JUN, KAT2A, KAT2B, MAML1, MAML2, MAML3, MAMLD1, MOV10, NOTCH1, NOTCH2, NOTCH3, NOTCH4, RBPJ, SNW1, TFDP1, TFDP2, TNRC6A, TNRC6B, TNRC6C, TP53
1203	Inducing Angiogenesis	PTK6 Promotes HIF1A Stabilization	reactome	EGFR, GPNMB, HBEGF, HIF1A, LRRK2, PTK6
1364	Inducing Angiogenesis	Regulation Of Gene Expression By Hypoxia Inducible Factor	reactome	ARNT, CA9, CITED2, CREBBP, EP300, EPAS1, EPO, HIF1A, HIF3A, VEGFA
1469	Inducing Angiogenesis	Signaling By NOTCH3 // Signaling By NOTCH4	reactome	ADAM10, APH1A, APH1B, DLL1, DLL4, JAG1, JAG2, NCSTN, NOTCH3, NOTCH4, PSEN2, PSENEN
1470	Inducing Angiogenesis	Signaling By PDGF	reactome	COL4A1, COL4A2, COL4A3, COL4A4, COL4A5, COL6A1, COL6A2, COL6A3, COL6A5, COL6A6, COL9A1, COL9A2, COL9A3, FURIN, PDGFA, PDGFB, PDGFC, PDGFD, PDGFRA, PDGFRB, PLAT, PLG, SPP1, THBS1, THBS2, THBS3, THBS4
1484	Inducing Angiogenesis	Signaling Events Mediated By VEGFR1 And VEGFR2	pid	AKAP1, AKT1, ARF1, BRAF, CALM1, CALM2, CALM3, CAMKK2, CAV1, CBL, CDC42, CDH5, CTNNA1, CTNNB1, DAG1, DNM2, FBXW11, FES, FLT1, FYN, GAB1, GRB10, GRB2, HGS, HSP90AA1, HSP90AB1, IQGAP1, ITGAV, ITGB3, KDR, MAP2K1, MAP2K2, MAP2K3, MAP2K6, MAPK1, MAPK11, MAPK14, MAPK3, MAPKAPK2, MYOF, NCK1, NCK2, NEDD4, NOS3, PAK2, PDPK1, PIK3CA, PIK3R1, PLCG1, PRKACA, PRKCA, PRKCB, PRKCD, PTK2, PTK2B, PTPN11, PTPN2, PT…
1645	Inducing Angiogenesis	Tie2 Signaling	kegg // smpdb	ANGPT1, ANGPT2, ANGPT4, DOK2, GRB14, GRB2, GRB7, HRAS, KRAS, NRAS, PIK3CA, PIK3CB, PIK3R1, PIK3R2, PTPN11, SHC1, SOS1, TEK
1707	Inducing Angiogenesis	VEGF And VEGFR Signaling Network // VEGF Binds To VEGFR Leading To Receptor Dimerization	kegg	FIGF, FLT1, FLT4, KDR, NRP1, NRP2, PGF, VEGFA, VEGFB, VEGFC
1708	Inducing Angiogenesis	VEGF Ligand Receptor Interactions	panther	FIGF, PGF, VEGFA, VEGFB, VEGFC
1709	Inducing Angiogenesis	VEGF Signaling Pathway	reactome	AKT1, ARAF, BRAF, CASP9, ETS1, HIF1A, HRAS, HSPB1, KDR, MAP2K1, MAP2K2, MAPK1, MAPK14, MAPK3, MAPKAPK2, MAPKAPK3, NOS3, NRAS, PIK3C2A, PIK3C2B, PIK3C3, PIK3CA, PIK3CB, PIK3CD, PIK3CG, PIK3R1, PIK3R2, PIK3R3, PLA2G4A, PLCG1, PLCG2, PRKCA, PRKCB, PRKCD, PRKCE, PRKCG, PRKCH, PRKCI, PRKCQ, PRKCZ, PRKD1, PRKD2, PRKD3, PTK2, PXN, RAC1, RAC2, RAC3, RAF1, SH2D2A, SHC2, SPHK1, SPHK2, VEGFA
1710	Inducing Angiogenesis	VEGFA VEGFR2 Pathway	reactome	ABI1, ABI2, AXL, BAIAP2, BCAR1, BRK1, CDC42, CRK, CYBA, CYBB, CYFIP1, CYFIP2, DOCK1, ELMO1, ELMO2, FYN, HSP90AA1, HSPB1, ITGAV, ITGB3, KDR, MAPK11, MAPK12, MAPK13, MAPK14, MAPKAPK2, MAPKAPK3, NCF1, NCF2, NCF4, NCK1, NCK2, NCKAP1, NCKAP1L, PAK2, PIK3CA, PIK3CB, PIK3R1, PIK3R2, PRKACA, PRKACB, PRKACG, PTK2, PTK2B, PXN, RAC1, RHOA, ROCK1, ROCK2, SH2D2A, SHB, SHC2, SRC, VAV1, VAV2, VAV3, VEGFA, WASF1…
1711	Inducing Angiogenesis	VEGFR1 Specific Signals	reactome	AKT1, CALM1, CALM2, CALM3, CAV1, CBL, CD2AP, FLT1, HIF1A, HSP90AA1, MAPK1, MAPK3, NCK1, NOS3, NRP1, NRP2, PDPK1, PGF, PIK3CA, PIK3R1, PLCG1, PRKACA, PRKCA, PRKCB, PTPN11, RASA1, SHC2, VEGFA, VEGFB
1712	Inducing Angiogenesis	VEGFR2 Mediated Cell Proliferation	reactome	AHCYL1, CALM1, CALM2, CALM3, HRAS, ITPR1, ITPR2, ITPR3, KDR, KRAS, NRAS, PDPK1, PLCG1, PRKCA, PRKCB, PRKCD, PRKCZ, RASA1, SPHK1, SRC, VEGFA
1713	Inducing Angiogenesis	VEGFR2 Mediated Vascular Permeability	humancyc // reactome // smpdb	AKT1, AKT2, AKT3, CALM1, CALM2, CALM3, CAV1, CDH5, CTNNA1, CTNNB1, CTNND1, HSP90AA1, JUP, MAPKAP1, MLST8, MTOR, NOS3, PAK1, PAK2, PAK3, PDPK1, PRR5, RAC1, RICTOR, THEM4, TRIB3, VAV1, VAV2, VAV3
1714	Inducing Angiogenesis	VEGFR3 Signaling In Lymphatic Endothelium	pid	AKT1, COL1A1, COL1A2, CREB1, CRK, FIGF, FLT4, FN1, GRB2, ITGA1, ITGA2, ITGA4, ITGA5, ITGB1, MAP2K4, MAPK1, MAPK11, MAPK14, MAPK3, PIK3CA, PIK3R1, PRRT2, RPS6KA1, SHC1, SOS1, VEGFC
1755	Inducing Angiogenesis	Wnt Signaling Pathway	reactome	ANKRD6, ARID1A, ARR3, ARRB1, ARRB2, AXIN1, BCL9, BTRC, CDH1, CDH10, CDH11, CDH12, CDH13, CDH15, CDH16, CDH17, CDH18, CDH19, CDH2, CDH20, CDH22, CDH23, CDH24, CDH3, CDH4, CDH5, CDH6, CDH7, CDH8, CDH9, CDHR1, CDHR2, CELSR1, CELSR2, CELSR3, CER1, CREBBP, CSNK1A1, CSNK1A1L, CSNK1D, CSNK1E, CSNK1G2, CSNK1G3, CSNK2A2, CSNK2A3, CSNK2B, CTBP1, CTBP2, CTNNA1, CTNNA2, CTNNA3, CTNNAL1, CTNNB1, DACT1, DCHS1,…
165	Genome Instability and Mutation	AndrogenReceptor	netpath	AES, AHR, AKT1, APPL1, AR, ARNT, ATF2, BAG1, BRCA1, BRINP1, CALR, CASP1, CASP3, CASP7, CASP8, CAV1, CCND1, CCND3, CCNE1, CCNH, CDC25A, CDC25B, CDC37, CDK1, CDK11B, CDK5, CDK7, CDK9, CEBPA, COX5B, CREB1, CREBBP, CTNNB1, DAPK3, DAXX, DBT, DDC, DDX5, EFCAB6, EGFR, EP300, ERCC2, ERCC3, ESR1, ETV5, FHL2, FKBP4, FLNA, FOXA1, FOXO1, GAPDH, GSK3B, GSN, GTF2F1, GTF2F2, GTF2H1, GTF2H2, GTF2H3, GTF2H4, HDAC…
56	Genome Instability and Mutation	ATF 2 Transcription Factor Network	pid	ACHE, ARG1, ATF2, ATF3, BCL2, BCL2L1, BRCA1, CBFB, CCNA2, CCND1, CDK4, COL24A1, CREB1, CSRP2, CUL3, CXCL8, DDIT3, DUSP1, DUSP10, DUSP5, DUSP8, EP300, ESR1, FOS, GADD45A, H2AFY, HBG2, HES1, HRK, IFNG, IL23A, IL6, INS, JDP2, JUN, JUNB, JUND, KAT5, MAPK1, MAPK11, MAPK14, MAPK3, MAPK8, MAPK9, MMP2, NF1, NOS2, PDGFRA, PLAU, POU2F1, PPARGC1A, PRKCA, RB1, RUVBL2, SELE, SERPINB5, SOCS3, TGFB2, TH
60	Genome Instability and Mutation	ATM Pathway	pid	ABL1, ATM, BID, BLM, BRCA1, CDC25A, CDC25C, CHEK2, CTBP1, DCLRE1C, FAM175A, FANCD2, H2AFX, KAT5, MDC1, MDM2, MRE11A, NBN, RAD17, RAD50, RAD9A, RBBP8, RFWD2, RNF8, SMC1A, SMC3, TERF2, TOP3A, TP53BP1, TRIM28, UBE2N, UIMC1, XRCC4, YWHAB
65	Genome Instability and Mutation	ATR Signaling Pathway	pid	ATR, ATRIP, BRCA2, BTRC, CCNA2, CDC25A, CDC25C, CDC6, CDK2, CEP164, CHEK1, CLSPN, FANCD2, FBXW11, HUS1, MCM2, MCM7, MDM2, NBN, PLK1, PPP2CA, PPP2R1A, PPP2R2B, RAD1, RAD17, RAD51, RAD9A, RFC2, RFC3, RFC4, RFC5, RPA1, RPA2, SMARCAL1, TIMELESS, TIPIN, TOPBP1, YWHAB, YWHAZ
205	Genome Instability and Mutation	Aurora A Signaling	pid	AJUBA, AKT1, ARHGEF7, AURKA, AURKAIP1, AURKB, BIRC5, BRCA1, CDC25B, CENPA, CKAP5, CPEB1, DLGAP5, FZR1, GADD45A, GIT1, GSK3B, KPNA1, KPNB1, MDM2, NDEL1, NFKBIA, OAZ1, PAK1, PPP2R5D, PRKACA, RAN, RASA1, TACC1, TACC3, TDRD7, TP53, TPX2
217	Genome Instability and Mutation	BARD1 Signaling Events	reactome	ATM, ATR, BACH1, BARD1, BRCA1, CCNE1, CDK2, CSTF1, EWSR1, FANCA, FANCC, FANCD2, FANCE, FANCF, FANCG, FANCL, MRE11A, NBN, PCNA, PRKDC, RAD50, RAD51, RBBP8, TOPBP1, TP53, UBE2D3, UBE2L3, XRCC5, XRCC6
386	Genome Instability and Mutation	Coregulation Of Androgen Receptor Activity	reactome	AKT1, APPL1, AR, BRCA1, CARM1, CASP8, CCND1, CCND3, CDK11B, CDK6, CDKN2A, CMTM2, CTDSP1, CTDSP2, CTNNB1, FHL2, FKBP4, GSN, HIP1, HNRNPA1, KDM1A, KDM3A, KDM4C, KLK2, KLK3, LATS2, MAK, MED1, NCOA2, NCOA4, NCOA6, NKX3-1, NRIP1, PA2G4, PATZ1, PAWR, PELP1, PIAS1, PIAS3, PIAS4, PRDX1, PRKDC, PTK2B, RANBP9, RPS6KA3, SNURF, SRF, SVIL, TCF4, TGFB1I1, TGIF1, TMF1, TMPRSS2, UBA3, UBE2I, UBE3A, VAV3, XRCC5, …
420	Genome Instability and Mutation	DNA Damage Recognition In GG NER	reactome	ACTB, ACTL6A, ACTR5, ACTR8, CETN2, COPS2, COPS3, COPS4, COPS5, COPS6, COPS7A, COPS7B, COPS8, CUL4A, CUL4B, DDB1, DDB2, GPS1, INO80, INO80B, INO80C, INO80D, INO80E, MCRS1, NFRKB, PARP1, PARP2, RAD23A, RAD23B, RBX1, RPS27A, RUVBL1, TFPT, UBA52, UBB, UBC, XPC, YY1
421	Genome Instability and Mutation	DNA Damage/Telomere Stress Induced Senescence	reactome	ACD, ATM, CCNA1, CCNA2, CCNE1, CCNE2, CDK2, CDKN1A, CDKN1B, EP400, H2AFB1, H2AFX, H2AFZ, H2BFS, HIST1H2AB, HIST1H2AC, HIST1H2AD, HIST1H2AE, HIST1H2AJ, HIST1H2BA, HIST1H2BB, HIST1H2BC, HIST1H2BD, HIST1H2BE, HIST1H2BF, HIST1H2BG, HIST1H2BH, HIST1H2BI, HIST1H2BJ, HIST1H2BK, HIST1H2BL, HIST1H2BM, HIST1H2BN, HIST1H2BO, HIST1H4A, HIST1H4B, HIST1H4C, HIST1H4D, HIST1H4E, HIST1H4F, HIST1H4H, HIST1H4I, HIS…
485	Genome Instability and Mutation	Dual Incision In TC NER // Gap Filling DNA Repair Synthesis And Ligation In TC NER	kegg	AQR, CCNH, CDK7, CUL4A, CUL4B, DDB1, EP300, ERCC1, ERCC2, ERCC3, ERCC4, ERCC5, ERCC6, ERCC8, GTF2H1, GTF2H2, GTF2H3, GTF2H4, GTF2H5, HMGN1, ISY1, LIG1, LIG3, MNAT1, PCNA, POLD1, POLD2, POLD3, POLD4, POLE, POLE2, POLK, POLR2A, POLR2B, POLR2C, POLR2D, POLR2E, POLR2F, POLR2G, POLR2H, POLR2I, POLR2J, POLR2K, POLR2L, PPIE, PRPF19, RBX1, RFC1, RFC2, RFC3, RFC4, RFC5, RPA1, RPA2, RPA3, RPS27A, TCEA1, UB…
489	Genome Instability and Mutation	E2F Transcription Factor Network	pid	APAF1, ATM, BRCA1, CASP7, CBX5, CCNA2, CCND3, CCNE1, CCNE2, CDC25A, CDC6, CDK1, CDK2, CDKN1A, CDKN1B, CDKN2A, CDKN2C, CEBPA, CES1, CES1P1, CES2, CES3, CES4A, CES5A, CREBBP, DHFR, E2F1, E2F2, E2F3, E2F4, E2F5, E2F6, E2F7, E2F8, EP300, HBP1, HDAC1, HIC1, KAT2A, KAT2B, MAD2L1BP, MCL1, MCM3, MYBL2, MYC, ORC1, PLAU, POLA1, PRMT5, PTGDR, RANBP1, RB1, RBBP4, RBBP8, RBL1, RBL2, RRM1, RRM2, RYBP, SERPINE1…
577	Genome Instability and Mutation	FOXA1 Transcription Factor Network	reactome	AP1B1, APOB, AR, ATP5J, BRCA1, C4BPB, CCND1, CDKN1B, CEBPB, COL18A1, CREBBP, CYP2C18, DSCAM, EP300, ESR1, FOS, FOXA1, FOXA2, FOXA3, GCG, INS, JUN, KLK3, NCOA3, NDUFV3, NFIA, NFIB, NFIC, NKX3-1, NR2F2, NRIP1, PISD, POU2F1, PRDM15, SCGB1A1, SERPINA1, SFTPA1, SFTPA2, SFTPD, SHH, SOD1, SP1, TFF1, VTN, XBP1
579	Genome Instability and Mutation	FOXM1 Transcription Factor Network	reactome	AURKB, BIRC5, BRCA2, CCNA2, CCNB1, CCNB2, CCND1, CCNE1, CDC25B, CDK1, CDK2, CDK4, CDKN2A, CENPA, CENPB, CENPF, CHEK2, CKS1B, CREBBP, EP300, ESR1, ETV5, FOS, FOXM1, GAS1, GSK3A, HIST1H2BA, HSPA1A, HSPA1B, HSPA7, LAMA4, MAP2K1, MMP2, MYC, NEK2, NFATC3, ONECUT1, PLK1, RB1, SKP2, SP1, TGFA, XRCC1
648	Genome Instability and Mutation	G2/M DNA Damage Checkpoint // Processing Of DNA Double Strand Break Ends	reactome	ATM, ATR, ATRIP, BABAM1, BARD1, BLM, BRCA1, BRCC3, BRE, BRIP1, CCNA1, CCNA2, CDK2, CHEK1, CHEK2, CLSPN, DNA2, EXO1, FAM175A, H2AFX, H2BFS, HERC2, HIST1H2BA, HIST1H2BB, HIST1H2BC, HIST1H2BD, HIST1H2BE, HIST1H2BF, HIST1H2BG, HIST1H2BH, HIST1H2BI, HIST1H2BJ, HIST1H2BK, HIST1H2BL, HIST1H2BM, HIST1H2BN, HIST1H2BO, HIST1H4A, HIST1H4B, HIST1H4C, HIST1H4D, HIST1H4E, HIST1H4F, HIST1H4H, HIST1H4I, HIST1H4J…
673	Genome Instability and Mutation	Gap Filling DNA Repair Synthesis And Ligation In GG NER	panther	LIG1, LIG3, PCNA, POLD1, POLD2, POLD3, POLD4, POLE, POLE2, POLK, RFC1, RFC2, RFC3, RFC4, RFC5, RPA1, RPA2, RPA3, RPS27A, UBA52, UBB, UBC, XRCC1
741	Genome Instability and Mutation	HDR Through Homologous Recombination (HRR)	reactome	ATM, BARD1, BLM, BRCA1, BRCA2, BRIP1, DNA2, EXO1, KAT5, MRE11A, NBN, PALB2, PCNA, POLD1, POLD2, POLD3, POLD4, POLE, POLE2, POLH, POLK, RAD50, RAD51, RAD51AP1, RAD51B, RAD51C, RAD51D, RBBP8, RFC1, RFC2, RFC3, RFC4, RFC5, RMI1, RMI2, RPA1, RPA2, RPA3, RPS27A, TOP3A, UBA52, UBB, UBC, WRN, XRCC2, XRCC3
743	Genome Instability and Mutation	HDR Through Single Strand Annealing (SSA)	reactome	ABL1, ATM, ATR, ATRIP, BARD1, BLM, BRCA1, BRIP1, DNA2, ERCC1, ERCC4, EXO1, HUS1, KAT5, MRE11A, NBN, RAD1, RAD17, RAD50, RAD51, RAD52, RAD9A, RAD9B, RBBP8, RFC2, RFC3, RFC4, RFC5, RHNO1, RMI1, RMI2, RPA1, RPA2, RPA3, TOP3A, TOPBP1, WRN
778	Genome Instability and Mutation	Homologous DNA Pairing And Strand Exchange // Resolution Of D Loop Structures Through Synthesis Dependent Strand Annealing (SDSA)	reactome	ATM, BARD1, BLM, BRCA1, BRCA2, BRIP1, DNA2, EXO1, KAT5, MRE11A, NBN, PALB2, RAD50, RAD51, RAD51AP1, RAD51B, RAD51C, RAD51D, RBBP8, RMI1, RMI2, RTEL1, TOP3A, WRN, XRCC2, XRCC3
877	Genome Instability and Mutation	Integrated Breast Cancer Pathway	pid	AKT1, ALKBH1, APOBEC3G, AQP7P3, AR, ARAF, ATF1, ATM, ATR, BACH1, BAD, BAK1, BARD1, BCL2, BID, BLM, BMPR2, BRAF, BRCA1, CCNB1IP1, CCND1, CDC25A, CDC25B, CDK2, CDK4, CERK, CHEK1, CHEK2, CHUK, CTNNB1, DCAKD, E2F1, EDAR, EGFR, FAU, FER, FILIP1, FOSL2, GSK3A, HDAC1, HIPK2, JAK1, JAKMIP1, LGALS13, MAP3K7CL, MAX, MDM2, MMP1, MSH2, MYC, MYT1, NAB1, NF1, NFKB1, NOXA1, ODC1, PAK1, PIAS1, PIK3R2, PKIA, PLK1…
878	Genome Instability and Mutation	Integrated Cancer Pathway	panther	AKT1, ATM, ATR, BAD, BAX, BCL2, BLM, BRCA1, CASP3, CASP8, CASP9, CDK1, CDK2, CDK4, CDKN1A, CDKN1B, CDKN2B, CHEK1, CHEK2, E2F1, JAK1, MAP3K5, MDM2, MMP1, MRE11A, MSH2, MSH6, NOXA1, POU2F1, PTEN, RAD50, RB1, SMAD2, SMAD3, STAT1, TP53
985	Genome Instability and Mutation	Meiotic Recombination	reactome	ATM, BLM, BRCA1, BRCA2, CDK2, CDK4, DMC1, H2AFB1, H2AFX, H2AFZ, H2BFS, H3F3A, H3F3B, HIST1H2AB, HIST1H2AC, HIST1H2AD, HIST1H2AE, HIST1H2AJ, HIST1H2BA, HIST1H2BB, HIST1H2BC, HIST1H2BD, HIST1H2BE, HIST1H2BF, HIST1H2BG, HIST1H2BH, HIST1H2BI, HIST1H2BJ, HIST1H2BK, HIST1H2BL, HIST1H2BM, HIST1H2BN, HIST1H2BO, HIST1H3A, HIST1H3B, HIST1H3C, HIST1H3D, HIST1H3E, HIST1H3F, HIST1H3G, HIST1H3H, HIST1H3I, HIST…
986	Genome Instability and Mutation	Meiotic Synapsis	humancyc // smpdb	ACD, ATR, BRCA1, DIDO1, FKBP6, H2AFB1, H2AFX, H2AFZ, H2BFS, HIST1H2AB, HIST1H2AC, HIST1H2AD, HIST1H2AE, HIST1H2AJ, HIST1H2BA, HIST1H2BB, HIST1H2BC, HIST1H2BD, HIST1H2BE, HIST1H2BF, HIST1H2BG, HIST1H2BH, HIST1H2BI, HIST1H2BJ, HIST1H2BK, HIST1H2BL, HIST1H2BM, HIST1H2BN, HIST1H2BO, HIST1H4A, HIST1H4B, HIST1H4C, HIST1H4D, HIST1H4E, HIST1H4F, HIST1H4H, HIST1H4I, HIST1H4J, HIST1H4K, HIST1H4L, HIST2H2AA…
1824	Genome Instability and Mutation	MiRNAs Involved In DNA Damage Response	reactome	ATM, CDC25A, CDK6, CDKN1B, CREB1, H2AFX, MYC, TP53
1120	Genome Instability and Mutation	Nonhomologous End Joining (NHEJ)	kegg	ATM, BABAM1, BARD1, BRCA1, BRCC3, BRE, DCLRE1C, FAM175A, H2AFX, H2BFS, HERC2, HIST1H2BA, HIST1H2BB, HIST1H2BC, HIST1H2BD, HIST1H2BE, HIST1H2BF, HIST1H2BG, HIST1H2BH, HIST1H2BI, HIST1H2BJ, HIST1H2BK, HIST1H2BL, HIST1H2BM, HIST1H2BN, HIST1H2BO, HIST1H4A, HIST1H4B, HIST1H4C, HIST1H4D, HIST1H4E, HIST1H4F, HIST1H4H, HIST1H4I, HIST1H4J, HIST1H4K, HIST1H4L, HIST2H2BE, HIST2H4A, HIST2H4B, HIST3H2BB, HIST…
1842	Genome Instability and Mutation	P53 Dependent G1 DNA Damage Response	pid // wikipathways	CCNA1, CCNA2, CCNE1, CCNE2, CDK2, CDKN1A, CDKN1B
1843	Genome Instability and Mutation	P73 Transcription Factor Network	panther	ABL1, ADA, AEN, AFP, BAK1, BAX, BBC3, BCL2L11, BIN1, BRCA2, BUB1, BUB3, CASP2, CCNA2, CCNB1, CCNE1, CCNE2, CDK1, CDK2, CDK6, CDKN1A, CHEK1, CLCA2, DCP1B, DEDD, EP300, FAS, FASN, FBXO45, FLOT2, FOXO3, GATA1, GDF15, GRAMD4, HAGH, HEY2, HSF1, IL1RAP, IL4R, ITCH, JAG2, JAK1, KAT5, MAPK11, MAPK14, MDM2, MYC, NDUFS2, NEDD4L, NTRK1, PEA15, PFDN5, PIN1, PLK1, PLK3, PLPP1, PML, PRKACB, RACK1, RAD51, RB1, …
1259	Genome Instability and Mutation	Presynaptic Phase Of Homologous DNA Pairing And Strand Exchange	reactome	ATM, ATR, ATRIP, BARD1, BLM, BRCA1, BRCA2, BRIP1, CHEK1, DNA2, EXO1, HUS1, KAT5, MRE11A, NBN, RAD1, RAD17, RAD50, RAD51, RAD51B, RAD51C, RAD51D, RAD9A, RAD9B, RBBP8, RFC2, RFC3, RFC4, RFC5, RHNO1, RMI1, RMI2, RPA1, RPA2, RPA3, TOP3A, TOPBP1, WRN, XRCC2
1327	Genome Instability and Mutation	Recognition Of DNA Damage By PCNA Containing Replication Complex	inoh	CUL4A, CUL4B, DDB1, DTL, PCNA, POLD1, POLD2, POLD3, POLD4, POLE, POLE2, RAD18, RBX1, RFC1, RFC2, RFC3, RFC4, RFC5, RPA1, RPA2, RPA3, RPS27A, UBA52, UBB, UBC, UBE2B, USP1, ZBTB32
1328	Genome Instability and Mutation	Recruitment And ATM Mediated Phosphorylation Of Repair And Signaling Proteins At DNA Double Strand Breaks	reactome	ABL1, APBB1, ATM, BABAM1, BARD1, BAZ1B, BRCA1, BRCC3, BRE, CHEK2, EYA1, EYA2, EYA3, EYA4, FAM175A, H2AFX, H2BFS, HERC2, HIST1H2BA, HIST1H2BB, HIST1H2BC, HIST1H2BD, HIST1H2BE, HIST1H2BF, HIST1H2BG, HIST1H2BH, HIST1H2BI, HIST1H2BJ, HIST1H2BK, HIST1H2BL, HIST1H2BM, HIST1H2BN, HIST1H2BO, HIST1H4A, HIST1H4B, HIST1H4C, HIST1H4D, HIST1H4E, HIST1H4F, HIST1H4H, HIST1H4I, HIST1H4J, HIST1H4K, HIST1H4L, HIST…
1357	Genome Instability and Mutation	Regulation Of TP53 Activity Through Phosphorylation	reactome	ATM, ATR, ATRIP, AURKA, AURKB, BARD1, BLM, BRCA1, BRIP1, CCNA1, CCNA2, CDK2, CDK5, CDK5R1, CHEK1, CHEK2, CSNK2A1, CSNK2A2, CSNK2B, DNA2, DYRK2, EXO1, HIPK1, HIPK2, HUS1, KAT5, MAPK11, MAPK14, MAPKAPK5, MDM2, MDM4, MRE11A, NBN, NOC2L, NUAK1, PIN1, PLK3, PRKAA1, PRKAA2, PRKAB1, PRKAB2, PRKAG1, PRKAG2, PRKAG3, RAD1, RAD17, RAD50, RAD9A, RAD9B, RBBP8, RFC2, RFC3, RFC4, RFC5, RHNO1, RMI1, RMI2, RPA1, …
1386	Genome Instability and Mutation	Resolution Of D Loop Structures Through Holliday Junction Intermediates	reactome	ATM, BARD1, BLM, BRCA1, BRCA2, BRIP1, DNA2, EME1, EME2, EXO1, GEN1, KAT5, MRE11A, MUS81, NBN, PALB2, RAD50, RAD51, RAD51AP1, RAD51B, RAD51C, RAD51D, RBBP8, RMI1, RMI2, SLX1A, SLX1B, SLX4, SPIDR, TOP3A, WRN, XRCC2, XRCC3
1425	Genome Instability and Mutation	SUMOylation Of DNA Damage Response And Repair Proteins	reactome	AAAS, BLM, BMI1, BRCA1, CBX2, CBX4, CBX8, CDKN2A, CETN2, EID3, HDAC7, HERC2, MDC1, NDC1, NSMCE1, NSMCE2, NSMCE3, NSMCE4A, NUP107, NUP133, NUP153, NUP155, NUP160, NUP188, NUP205, NUP210, NUP214, NUP35, NUP37, NUP43, NUP50, NUP54, NUP58, NUP62, NUP85, NUP88, NUP93, NUP98, NUPL2, PARP1, PCGF2, PHC1, PHC2, PHC3, PIAS1, PIAS2, PIAS4, PML, POM121, POM121C, RAD21, RAD52, RAE1, RANBP2, RING1, RNF168, RNF…
1582	Genome Instability and Mutation	TGF Beta Receptor	pid	ACVRL1, AKT1, ANAPC1, ANAPC10, ANAPC2, ANAPC4, ANAPC5, ANAPC7, AP2B1, AR, ARRB2, ATF2, ATF3, AXIN1, AXIN2, BCAR1, BRCA1, BTRC, CAMK2A, CAMK2B, CAMK2D, CAMK2G, CAV1, CCNB2, CCND1, CCNE1, CD44, CDC16, CDC23, CDC25A, CDC27, CDK1, CDK2, CDK4, CDK6, CDKN1A, CHUK, CITED1, COPS5, CREBBP, CRK, CSNK1G2, CTCF, CTNNA1, CTNNA2, CTNNB1, CUL1, DAB2, DAXX, DCP1A, DDX5, DVL1, DYNC1I1, DYNLRB1, DYNLRB2, E2F4, E2F…
1596	Genome Instability and Mutation	TP53 Regulates Transcription Of DNA Repair Genes	reactome	ATF2, ATM, ATR, BRCA1, CCNH, CCNK, CCNT1, CCNT2, CDK12, CDK13, CDK7, CDK9, CHEK1, CTDP1, DDB2, ELL, ERCC2, ERCC3, FANCC, FANCD2, FANCI, FOS, GTF2F1, GTF2F2, GTF2H1, GTF2H2, GTF2H3, GTF2H4, GTF2H5, JUN, MDC1, MLH1, MNAT1, MSH2, NELFA, NELFB, NELFCD, NELFE, PMS2, POLR2A, POLR2B, POLR2C, POLR2D, POLR2E, POLR2F, POLR2G, POLR2H, POLR2I, POLR2J, POLR2K, POLR2L, RAD51D, SSRP1, SUPT16H, SUPT4H1, SUPT5H, …
1715	Genome Instability and Mutation	Validated Nuclear Estrogen Receptor Alpha Network	pid // reactome	ABCA3, ANP32A, AP1B1, APBB1, ATP5J, AXIN2, BRCA1, C3, CALCOCO1, CCND1, CD82, CEBPB, CHUK, COL18A1, CTSD, DDX17, DDX54, DSCAM, EBAG9, EP300, ESR1, ESR2, GREB1, HDAC1, HDAC4, HSF2, JUN, KLRC3, LCOR, LMO4, MED1, MPG, MTA1, MYC, NCOA1, NCOA2, NCOA3, NCOA7, NCOR1, NCOR2, NDUFV3, NEDD8, NR0B1, NR0B2, NRIP1, PCNA, PDIA2, PGR, PHB2, POU4F1, POU4F2, PRDM15, PRL, SAFB, SET, SFI1, SMAD4, SOD1, SRA1, STAT5A,…
1718	Genome Instability and Mutation	Validated Targets Of C MYC Transcriptional Repression	reactome	ALDH9A1, BCL2, BRCA1, CCL5, CCND1, CDKN1A, CDKN1B, CDKN2B, CEBPA, CEBPD, CFLAR, CLU, COL1A2, CREB1, CSDE1, DDIT3, DKK1, DNMT3A, DNTT, EP300, ERBB2, FOXO3, FTH1, GADD45A, GFI1, GTF2H2, HDAC1, HDAC3, HMGCS2, ID2, IRF8, ITGA6, ITGB1, ITGB4, LGALS1, MAX, MXD4, MYC, NDRG1, NDRG2, NFYA, NFYB, NFYC, PDGFRB, PPP2R4, RBL1, S100A7, SFRP1, SFXN3, SLC11A1, SMAD2, SMAD3, SMAD4, SP1, SPI1, TBP, TJP2, TMEFF2, T…
1721	Genome Instability and Mutation	Validated Transcriptional Targets Of DeltaNp63 Isoforms	reactome	ADA, ADRM1, ATM, AXL, BDKRB2, BRCA2, CCNB2, CDKN2A, CEBPD, COL5A1, DLX5, DLX6, FASN, FBXW7, FOSL2, GPX2, GSK3B, HBP1, HELLS, HES1, IGFBP3, IL1A, ITCH, ITGA3, KRT14, KRT5, MDM2, MRE11A, NOTCH1, NRG1, PERP, POU2F2, PPP2R5A, RAB38, RACK1, RRAD, RUNX1, SEC14L2, SFN, STXBP4, T, TCF7L1, TOP2A, TP63, VDR, WWP1, YAP1
173	Resisting Cell Death	Apoptosis	wikipathways	BCL2L11, DIABLO, JUN, MCL1, MYC, TNF, TNFSF10, TP53
175	Resisting Cell Death	Apoptosis Related Network Due To Altered Notch3 In Ovarian Cancer	wikipathways	CDKN1B, GCLC, RPS6KB1, TNF, VIM
174	Resisting Cell Death	Apoptosis Signaling Pathway	panther	AIFM1, AKT1, AKT2, AKT3, APAF1, ATF2, ATF3, ATF4, ATF6, ATF6B, ATF7, BAG3, BAG4, BAK1, BAX, BCL2, BCL2L1, BCL2L10, BCL2L11, BCL2L2, BCL2L2-PABPN1, BIK, BIRC2, BIRC3, BOK, CASP10, CASP3, CASP7, CASP8, CASP9, CFLAR, CHUK, CRADD, CYCS, DAXX, DIABLO, EIF2AK2, EIF2S1, ENDOG, FADD, FAS, FASLG, FOS, GZMB, HSPA1A, HSPA1B, HSPA1L, HSPA2, HSPA5, HSPA6, HSPA7, HSPA8, IGF2R, IKBKB, JUN, LTA, LTB, MADD, MAP2K…
176	Resisting Cell Death	Apoptotic Cleavage Of Cell Adhesion Proteins	reactome	CASP3, CDH1, CTNNB1, DSG1, DSG2, DSG3, DSP, OCLN, PKP1, TJP1, TJP2
177	Resisting Cell Death	Apoptotic Cleavage Of Cellular Proteins	reactome	ACIN1, APC, BCAP31, BIRC2, BMX, CASP3, CASP6, CASP7, CASP8, CLSPN, FNTA, PRKCD, PRKCQ, PTK2, ROCK1, SATB1, STK24, STK26
221	Resisting Cell Death	BH3 Only Proteins Associate With And Inactivate Anti Apoptotic BCL 2 Members	pid	BAD, BBC3, BCL2, BCL2L1, BCL2L11, BID, BMF, PMAIP1
558	Resisting Cell Death	FAS (CD95) Signaling Pathway	smpdb	AKT1, BID, BIRC2, BIRC3, BTK, CASP10, CASP3, CASP8, CFLAR, CHUK, CLTC, EZR, FADD, FAIM2, FAS, FASLG, IKBKB, IKBKG, MAP2K6, MAP2K7, MAP3K1, MAPK10, MAPK11, MAPK14, MAPK8, MAPK9, PDPK1, PIK3CA, PIK3CB, PIK3R1, PTPN13, RFC1, RIPK1, SMPD1, SRC, SYK
559	Resisting Cell Death	FAS Pathway And Stress Induction Of HSP Regulation	smpdb	ARHGDIB, DAXX, JUN, MAP3K7, PRKDC
560	Resisting Cell Death	FAS Signaling Pathway	reactome	APAF1, CAPG, CASP10, CASP3, CASP6, CASP7, CASP8, CASP9, CFLAR, CYC1, DAXX, DFFB, EGFR, ERBB2, ERBB3, ERBB4, FADD, FAF1, FAS, FASLG, GLI1, GLI3, GSN, JUN, LMNA, LMNB1, LMNB2, MAP2K4, MAP3K5, MAPK10, MAPK8, MAPK9, PARP1, PARP2, PARP3, PARP4, SCIN
592	Resisting Cell Death	FasL/ CD95L Signaling	pid // reactome	CASP10, CASP8, FADD, FAS, FASLG
648	Resisting Cell Death	G2/M DNA Damage Checkpoint // Processing Of DNA Double Strand Break Ends	reactome	ATM, ATR, ATRIP, BABAM1, BARD1, BLM, BRCA1, BRCC3, BRE, BRIP1, CCNA1, CCNA2, CDK2, CHEK1, CHEK2, CLSPN, DNA2, EXO1, FAM175A, H2AFX, H2BFS, HERC2, HIST1H2BA, HIST1H2BB, HIST1H2BC, HIST1H2BD, HIST1H2BE, HIST1H2BF, HIST1H2BG, HIST1H2BH, HIST1H2BI, HIST1H2BJ, HIST1H2BK, HIST1H2BL, HIST1H2BM, HIST1H2BN, HIST1H2BO, HIST1H4A, HIST1H4B, HIST1H4C, HIST1H4D, HIST1H4E, HIST1H4F, HIST1H4H, HIST1H4I, HIST1H4J…
778	Resisting Cell Death	Homologous DNA Pairing And Strand Exchange // Resolution Of D Loop Structures Through Synthesis Dependent Strand Annealing (SDSA)	reactome	ATM, BARD1, BLM, BRCA1, BRCA2, BRIP1, DNA2, EXO1, KAT5, MRE11A, NBN, PALB2, RAD50, RAD51, RAD51AP1, RAD51B, RAD51C, RAD51D, RBBP8, RMI1, RMI2, RTEL1, TOP3A, WRN, XRCC2, XRCC3
1054	Resisting Cell Death	NADE Modulates Death Signalling	inoh	CASP2, CASP3, NGF, NGFR, NGFRAP1, YWHAE
1071	Resisting Cell Death	NRAGE Signals Death Through JNK	reactome	AATF, ABR, AKAP13, ARHGAP4, ARHGEF11, ARHGEF12, ARHGEF16, ARHGEF17, ARHGEF18, ARHGEF2, ARHGEF3, ARHGEF4, ARHGEF6, ARHGEF7, ARHGEF9, BAD, BCL2L11, ECT2, FGD1, FGD2, FGD3, FGD4, ITSN1, KALRN, MAGED1, MAPK8, MCF2, MCF2L, NET1, NGEF, NGF, NGFR, OBSCN, PLEKHG2, PLEKHG5, RAC1, RASGRF2, SOS1, SOS2, TIAM1, TIAM2, TRIO, VAV1, VAV2, VAV3
1072	Resisting Cell Death	NRIF Signals Cell Death From The Nucleus	reactome	APH1A, APH1B, ITGB3BP, MAPK8, NCSTN, NGF, NGFR, PSEN2, PSENEN, RPS27A, SQSTM1, TRAF6, UBA52, UBB, UBC
1259	Resisting Cell Death	Presynaptic Phase Of Homologous DNA Pairing And Strand Exchange	reactome	ATM, ATR, ATRIP, BARD1, BLM, BRCA1, BRCA2, BRIP1, CHEK1, DNA2, EXO1, HUS1, KAT5, MRE11A, NBN, RAD1, RAD17, RAD50, RAD51, RAD51B, RAD51C, RAD51D, RAD9A, RAD9B, RBBP8, RFC2, RFC3, RFC4, RFC5, RHNO1, RMI1, RMI2, RPA1, RPA2, RPA3, TOP3A, TOPBP1, WRN, XRCC2
1328	Resisting Cell Death	Recruitment And ATM Mediated Phosphorylation Of Repair And Signaling Proteins At DNA Double Strand Breaks	reactome	ABL1, APBB1, ATM, BABAM1, BARD1, BAZ1B, BRCA1, BRCC3, BRE, CHEK2, EYA1, EYA2, EYA3, EYA4, FAM175A, H2AFX, H2BFS, HERC2, HIST1H2BA, HIST1H2BB, HIST1H2BC, HIST1H2BD, HIST1H2BE, HIST1H2BF, HIST1H2BG, HIST1H2BH, HIST1H2BI, HIST1H2BJ, HIST1H2BK, HIST1H2BL, HIST1H2BM, HIST1H2BN, HIST1H2BO, HIST1H4A, HIST1H4B, HIST1H4C, HIST1H4D, HIST1H4E, HIST1H4F, HIST1H4H, HIST1H4I, HIST1H4J, HIST1H4K, HIST1H4L, HIST…
1372	Resisting Cell Death	Regulation Of Necroptotic Cell Death	reactome	BIRC2, BIRC3, CASP8, RIPK1, TRADD, TRAF2, XIAP
1425	Resisting Cell Death	SUMOylation Of DNA Damage Response And Repair Proteins	reactome	AAAS, BLM, BMI1, BRCA1, CBX2, CBX4, CBX8, CDKN2A, CETN2, EID3, HDAC7, HERC2, MDC1, NDC1, NSMCE1, NSMCE2, NSMCE3, NSMCE4A, NUP107, NUP133, NUP153, NUP155, NUP160, NUP188, NUP205, NUP210, NUP214, NUP35, NUP37, NUP43, NUP50, NUP54, NUP58, NUP62, NUP85, NUP88, NUP93, NUP98, NUPL2, PARP1, PCGF2, PHC1, PHC2, PHC3, PIAS1, PIAS2, PIAS4, PML, POM121, POM121C, RAD21, RAD52, RAE1, RANBP2, RING1, RNF168, RNF…
1591	Resisting Cell Death	TNFalpha	pid	ACTL6A, AKAP8, AKT1, AKT2, ALPL, APAF1, ARHGEF1, ARHGEF2, BAG4, BAX, BCL2L1, BCL3, BCL7A, BID, BIRC2, BIRC3, BRINP1, BTRC, CASP10, CASP2, CASP3, CASP7, CASP8, CASP9, CAV1, CCNT1, CDC34, CDC37, CDK5, CDK9, CFL1, CFLAR, CHUK, COMMD1, COPB2, COPS3, COPS5, CRADD, CREB1, CREBBP, CRYAB, CSNK2A1, CUL1, CYBA, DCAF7, DDX3X, DIABLO, DOK1, DPF2, EED, EGFR, EP300, ERBB2, ERBB3, FADD, FAF1, FANCD2, FBL, FBXW1…
1597	Resisting Cell Death	TP53 Regulates Transcription Of Death Receptors And Ligands	reactome	FAS, IGFBP3, PPP1R13B, TMEM219, TNFRSF10A, TNFRSF10B, TNFRSF10C, TNFRSF10D, TP53, TP53BP2, TP63, TP73
1596	Resisting Cell Death	TP53 Regulates Transcription Of DNA Repair Genes	reactome	ATF2, ATM, ATR, BRCA1, CCNH, CCNK, CCNT1, CCNT2, CDK12, CDK13, CDK7, CDK9, CHEK1, CTDP1, DDB2, ELL, ERCC2, ERCC3, FANCC, FANCD2, FANCI, FOS, GTF2F1, GTF2F2, GTF2H1, GTF2H2, GTF2H3, GTF2H4, GTF2H5, JUN, MDC1, MLH1, MNAT1, MSH2, NELFA, NELFB, NELFCD, NELFE, PMS2, POLR2A, POLR2B, POLR2C, POLR2D, POLR2E, POLR2F, POLR2G, POLR2H, POLR2I, POLR2J, POLR2K, POLR2L, RAD51D, SSRP1, SUPT16H, SUPT4H1, SUPT5H, …
1602	Resisting Cell Death	TP53 Regulates Transcription Of Several Additional Cell Death Genes Whose Specific Roles In P53 Dependent Apoptosis Remain Uncertain	reactome	BCL2L14, BCL6, BIRC5, CHM, NDRG1, PERP, PPP1R13B, RABGGTA, RABGGTB, TP53, TP53BP2, TP53I3, TP63, TP73
1610	Resisting Cell Death	TRAIL Signaling	reactome	CASP10, CASP8, CFLAR, FADD, TNFRSF10A, TNFRSF10B, TNFSF10
1611	Resisting Cell Death	TRAIL Signaling Pathway	inoh	CASP10, CASP8, CFLAR, CHUK, DAP3, FADD, IKBKB, IKBKG, MAP2K4, MAP3K1, MAPK1, MAPK3, MAPK8, PIK3CA, PIK3CB, PIK3R1, RIPK1, SMPD1, TNFRSF10A, TNFRSF10B, TNFRSF10C, TNFRSF10D, TNFSF10, TRADD, TRAF2
1612	Resisting Cell Death	TRIF Mediated Programmed Cell Death	reactome	CASP8, CD14, FADD, LY96, RIPK1, RIPK3, TICAM1, TICAM2, TLR3, TLR4
76	Deregulating Cellular Energetics	Acetylcholine Regulates Insulin Secretion	reactome	CHRM3, GNA11, GNA14, GNA15, GNAQ, MARCKS, PLCB1, PLCB2, PLCB3, PRKCA
125	Deregulating Cellular Energetics	Adrenaline,noradrenaline Inhibits Insulin Secretion	reactome	ADCY5, ADCY6, ADRA2A, ADRA2C, CACNA1C, CACNA1D, CACNA2D2, CACNB2, CACNB3, GNAI1, GNAI2, GNB1, GNB2, GNB3, GNB4, GNB5, GNG10, GNG11, GNG12, GNG13, GNG2, GNG3, GNG4, GNG5, GNG7, GNG8, GNGT1, GNGT2
37	Deregulating Cellular Energetics	AKT(PKB) Activation Signaling ( IGF1 Signaling Pathway ) // AKT(PKB) Activation Signaling ( Insulin Receptor Signaling (D. Melanogaster) ) // AKT(PKB) Activation Signaling ( PDGF Signaling Pathway )	inoh	AKT1, AKT2, AKT3, PDPK1, PIK3CA, PIK3CB, PIK3CD
38	Deregulating Cellular Energetics	AKT(PKB) Activation Signaling ( Insulin Receptor Signaling (Mammal) )	inoh	AKT1, AKT2, AKT3, MAPKAP1, MLST8, MTOR, PDPK1, PIK3CA, PIK3CB, PIK3CD, RICTOR, TSC1, TSC2
40	Deregulating Cellular Energetics	AKT(PKB) Bad Signaling ( Insulin Receptor Signaling (D. Melanogaster) ) // AKT(PKB) Bad Signaling ( Insulin Receptor Signaling (Mammal) )	inoh	AKT1, AKT2, AKT3, BAD, SFN, YWHAB, YWHAE, YWHAG, YWHAH, YWHAQ, YWHAZ
41	Deregulating Cellular Energetics	AKT(PKB) GSK3beta Signaling ( Insulin Receptor Signaling (D. Melanogaster) ) // AKT(PKB) GSK3beta Signaling ( Insulin Receptor Signaling (Mammal) )	inoh	AKT1, AKT2, AKT3, GSK3B, GYS1, GYS2
42	Deregulating Cellular Energetics	AKT(PKB) MTOR Signaling ( Insulin Receptor Signaling (Mammal) ) // AKT(PKB) TOR Signaling ( Insulin Receptor Signaling (D. Melanogaster) )	inoh	AKT1, AKT2, AKT3, EIF4A1, EIF4A2, EIF4E, EIF4EBP1, EIF4G1, EIF4G3, MTOR, PTEN, RHEB, RPS6, RPS6KB1, TSC2
532	Deregulating Cellular Energetics	Energy Dependent Regulation Of MTOR By LKB1 AMPK	reactome	CAB39, CAB39L, LAMTOR1, LAMTOR2, LAMTOR3, LAMTOR4, LAMTOR5, MLST8, MTOR, PPM1A, PRKAA1, PRKAA2, PRKAB1, PRKAB2, PRKAG1, PRKAG2, PRKAG3, RHEB, RPTOR, RRAGA, RRAGB, RRAGC, RRAGD, STK11, STRADA, STRADB, TSC1, TSC2
512	Deregulating Cellular Energetics	ERK Cascade ( B Cell Receptor Signaling ) // ERK Cascade ( CD4 T Cell Receptor Signaling ) // ERK Cascade ( FGF Signaling Pathway ) // ERK Cascade ( GPCR Adenosine A2A Receptor Signaling Pathway ) // ERK Cascade ( GPCR GroupI Metabotropic Glutamate Receptor Signaling Pathway ) // ERK Cascade ( GPCR Signaling (G Alpha Q) ) // ERK Cascade ( GPCR Signaling (G Alpha S, Epac And ERK) ) // ERK Cascade …	reactome	ARAF, BRAF, ELK1, MAP2K1, MAP2K2, MAPK1, MAPK3, RAF1
594	Deregulating Cellular Energetics	Fatty Acids Bound To GPR40 (FFAR1) Regulate Insulin Secretion	inoh	FFAR1, GNA11, GNA14, GNA15, GNAQ, PLCB1, PLCB2, PLCB3
677	Deregulating Cellular Energetics	Gene Expression By FOXO ( Insulin Receptor Signaling (D. Melanogaster) ) // Gene Expression Of MAFbx By FOXO ( Insulin Receptor Signaling (Mammal) ) // Gene Expression Of MuRF1 By FOXO ( Insulin Receptor Signaling (Mammal) )	wikipathways	FOXO1, FOXO3, FOXO4, FOXO6
689	Deregulating Cellular Energetics	Glucagon Like Peptide 1 (GLP1) Regulates Insulin Secretion	reactome	ADCY5, ADCY6, ADCY8, AKAP5, GCG, GLP1R, GNAS, GNB1, GNB2, GNB3, GNB4, GNB5, GNG10, GNG11, GNG12, GNG13, GNG2, GNG3, GNG4, GNG5, GNG7, GNG8, GNGT1, GNGT2, IQGAP1, ITPR1, ITPR2, ITPR3, KCNB1, KCNC2, KCNG2, KCNS3, PRKACA, PRKACB, PRKACG, PRKAR1A, PRKAR1B, PRKAR2A, PRKAR2B, RAP1A, RAPGEF3, RAPGEF4
716	Deregulating Cellular Energetics	Glycolysis	reactome	ALDOA, ENO1, GAPDH, GPI, HK2, PFKM, PGAM2, PGK1, PKLR
717	Deregulating Cellular Energetics	Glycolysis / Gluconeogenesis	reactome	ACSS2, ADH1A, ADH1B, ADH1C, ADH4, ADH5, ADH6, ADH7, ADPGK, AKR1A1, ALDH3A1, ALDH3A2, ALDOC, BPGM, DLAT, DLD, ENO1, ENO2, ENO3, FBP1, G6PC, G6PC2, GALM, GAPDH, GCK, GPI, HK1, HK2, HK3, HKDC1, LDHAL6A, NME1, NME2, NME3, NME4, NME5, NME6, NME7, OGDH, OGDHL, PCK2, PDHB, PFKP, PGK2, PGM1, PGM2, PKLR, PKM, TPI1
718	Deregulating Cellular Energetics	Glycolysis And Gluconeogenesis ( Glycolysis And Gluconeogenesis )	kegg // smpdb	FBP1, FBP2, G6PC, GCK, HK1, HK2, HK3, PFKL, PFKM, PFKP, PKLR, PKM
745	Deregulating Cellular Energetics	HIF 1 Alpha Transcription Factor Network	reactome	ABCB1, ABCG2, ADM, AKT1, ALDOA, ARNT, BHLHE40, BHLHE41, BNIP3, CA9, CITED2, COPS5, CP, CREB1, CREBBP, CXCL12, CXCR4, EDN1, EGLN1, EGLN3, ENG, ENO1, EP300, EPO, ETS1, FECH, FOS, FURIN, GATA2, GCK, HDAC7, HIF1A, HK1, HK2, HMOX1, HNF4A, ID2, IGFBP1, ITGB2, JUN, LDHA, LEP, MCL1, NCOA1, NCOA2, NDRG1, NOS2, NPM1, NT5E, PFKFB3, PFKL, PGK1, PGM1, PKM, PLIN2, RORA, SERPINE1, SLC2A1, SLC2A3, SMAD3, SMAD4, …
746	Deregulating Cellular Energetics	HIF 2 Alpha Transcription Factor Network	reactome	ABCG2, ADORA2A, APEX1, ARNT, BHLHE40, CITED2, CREBBP, EFNA1, EGLN1, EGLN2, EGLN3, EIF3E, ELK1, EP300, EPAS1, EPO, ETS1, FLT1, FXN, HIF1AN, KDR, MMP14, PGK1, POU5F1, SERPINE1, SIRT1, SLC11A2, SLC2A1, SP1, TCEB1, TCEB2, TWIST1, VEGFA, VHL
787	Deregulating Cellular Energetics	Hypoxia Response Via HIF Activation	reactome	AKT1, AKT2, AKT3, ARNT, CREBBP, EGLN1, EGLN2, EGLN3, GPR37, HIF1A, MTOR, PARK2, PTEN, TXN, TXN2, VHL
788	Deregulating Cellular Energetics	Hypoxic And Oxygen Homeostasis Regulation Of HIF 1 Alpha	reactome	ARNT, CDKN2A, COPS5, CUL2, EGLN1, EGLN2, EGLN3, HIF1A, HIF1AN, HIF3A, HSP90AA1, NAA10, OS9, RACK1, RBX1, TCEB1, TCEB2, TP53, VHL
873	Deregulating Cellular Energetics	Insulin Like Growth Factor 2 MRNA Binding Proteins (IGF2BPs/IMPs/VICKZs) Bind RNA	reactome	ACTB, CD44, IGF2, IGF2BP1, IGF2BP2, IGF2BP3
874	Deregulating Cellular Energetics	Insulin Mediated Glucose Transport	inoh	AKT1, AKT2, ASIP, CALM1, CALM2, CALM3, GSK3B, GYS1, INS, INSR, LNPEP, PPP1CC, PPP1R3A, PRKCI, PRKCZ, RHOQ, SFN, SLC2A4, STX4, STXBP4, TBC1D4, TRIP10, VAMP2, YKT6, YWHAB, YWHAE, YWHAG, YWHAH, YWHAQ, YWHAZ
867	Deregulating Cellular Energetics	Insulin Pathway	kegg // smpdb	AKT1, AKT2, CAV1, CBL, CRK, DOK1, EIF4EBP1, EXOC1, EXOC2, EXOC3, EXOC4, EXOC5, EXOC6, EXOC7, EXOC8, F2RL2, FOXO3, GRB10, GRB14, GRB2, HRAS, INPP5D, INS, INSR, IRS1, NCK1, NCK2, PARD6A, PDPK1, PIK3CA, PIK3R1, PRKCI, PRKCZ, PTPN1, PTPN11, PTPRA, RAPGEF1, RASA1, RHOQ, RPS6KB1, SCNN1A, SGK1, SH2B2, SHC1, SORBS1, SOS1, TRIP10
869	Deregulating Cellular Energetics	Insulin Processing	reactome	CPE, CPN1, ERO1A, ERO1B, EXOC1, EXOC2, EXOC3, EXOC4, EXOC5, EXOC6, EXOC7, EXOC8, INS, KIF5A, KIF5B, KIF5C, MYO5A, PCSK1, PCSK2, RAB27A, SLC30A5, SLC30A6, SLC30A7, SLC30A8, STX1A, VAMP2
870	Deregulating Cellular Energetics	Insulin Receptor Recycling // Ion Channel Transport // Transferrin Endocytosis And Recycling	pid	ATP6AP1, ATP6V0A1, ATP6V0A2, ATP6V0A4, ATP6V0B, ATP6V0C, ATP6V0D1, ATP6V0D2, ATP6V0E1, ATP6V0E2, ATP6V1A, ATP6V1B1, ATP6V1B2, ATP6V1C1, ATP6V1C2, ATP6V1D, ATP6V1E1, ATP6V1E2, ATP6V1F, ATP6V1G1, ATP6V1G2, ATP6V1G3, ATP6V1H, INS, INSR, MCOLN1, STEAP2, STEAP3, TCIRG1, TF, TFRC
871	Deregulating Cellular Energetics	Insulin Receptor Signaling ( Insulin Receptor Signaling (D. Melanogaster) ) // Insulin Receptor Signaling (Mammal) ( Insulin Receptor Signaling (Mammal) )	smpdb	AKT1, AKT1S1, AKT2, AKT3, ARAF, BRAF, EIF4E, EIF4EBP1, FKBP1A, FKBP8, GRB2, GSK3B, HRAS, INS, INSR, IRS1, IRS2, IRS4, KRAS, MLST8, MTOR, NRAS, PIK3CA, PIK3CB, PIK3CD, PIK3R1, PIK3R2, PPP2R1A, PPP2R1B, PPP2R2B, PPP2R2C, PPP2R3A, PPP2R3B, PPP2R4, PPP2R5A, PPP2R5B, PPP2R5C, PPP2R5D, PPP2R5E, PRKAA1, PRKAA2, PRKAB1, PRKAB2, PRKAG1, PRKAG2, PRKAG3, RAF1, RPTOR, SFN, SHC1, SHC2, SHC3, SLC2A4, SOS1, SOS…
872	Deregulating Cellular Energetics	Insulin Receptor Signalling Cascade	reactome	GRB10, GRB2, HRAS, INS, INSR, KRAS, NRAS, SHC1, SOS1
868	Deregulating Cellular Energetics	Insulin Signalling	inoh	AKT1, GRB2, HRAS, INS, INSR, IRS1, IRS2, MAP2K1, MAP2K2, MAPK1, PDPK1, PIK3CG, PIK3R6, RAF1, SHC1, SLC2A4, SOS1
875	Deregulating Cellular Energetics	Insulin/IGF Pathway Mitogen Activated Protein Kinase Kinase/MAP Kinase Cascade	reactome	ELK1, FOS, IGF1, IGF1R, IGF2, IGF2R, INS, INSR, INSRR, IRS1, IRS2, IRS4, MAP2K1, MAP2K2, MAP2K3, MAPK1, MAPK3, RAF1, RASA1, RPS6KA1, RPS6KA2, RPS6KA3, RPS6KA4, RPS6KA5, RPS6KA6, RPS6KB1, RPS6KB2, SOS1, SOS2
876	Deregulating Cellular Energetics	Insulin/IGF Pathway Protein Kinase B Signaling Cascade	reactome	FOXO1, FOXO3, GSK3A, GSK3B, IGF1, IGF1R, IGF2, IGF2R, INPPL1, INS, INSR, INSRR, IRS1, IRS2, IRS4, MDM2, MDM4, PDPK1, PIK3CA, PTEN, TSC1, TSC2
956	Deregulating Cellular Energetics	Leucine Stimulation On Insulin Signaling	smpdb	AKT1, EIF4E, EIF4EBP1, INS, INSR, IRS1, IRS2, MTOR, PIK3CG, PIK3R6, RHEB, RPS6KB1, SLC7A5, TSC1, TSC2
1014	Deregulating Cellular Energetics	Mitochondrial Beta Oxidation Of Long Chain Saturated Fatty Acids	reactome	ACAA2, ACADL, ACSL1, CPT1A, CPT2, ECHS1, HADH, HADHA, HADHB, SLC25A20
1015	Deregulating Cellular Energetics	Mitochondrial Beta Oxidation Of Medium Chain Saturated Fatty Acids	reactome	ACAA2, ACADM, ACSM1, ECHS1, HADH, HADHA, HADHB, SLC25A20
1016	Deregulating Cellular Energetics	Mitochondrial Beta Oxidation Of Short Chain Saturated Fatty Acids // Short Chain 3 Hydroxyacyl CoA Dehydrogenase Deficiency (SCHAD)	reactome	ACAA2, ACADL, ACADS, ACAT1, ACSS3, ECHS1, HADH, HSD17B10
1050	Deregulating Cellular Energetics	NAD+ + (S) Lactic Acid = NADH + Pyruvic Acid ( Glycolysis And Gluconeogenesis ) // NAD+ + (S) Lactic Acid = NADH + Pyruvic Acid ( Pyruvate Metabolism ) // NAD+ + 2 Hydroxy Butanoic Acid = NADH + 2 Oxo Butanoic Acid ( Propanoate Metabolism ) // NAD+ + 3 Mercapto Lactic Acid = NADH + 3 Mercapto Pyruvic Acid ( Methionine And Cysteine Metabolism )	reactome	LDHA, LDHAL6B, LDHB, LDHC
1093	Deregulating Cellular Energetics	Negative Regulation Of Gene Expression ( Insulin Receptor Signaling (D. Melanogaster) ) // Negative Regulation Of Gene Expression ( Insulin Receptor Signaling (Mammal) )	reactome	AKT1, AKT2, AKT3, FOXO1, FOXO3, FOXO4, FOXO6
1203	Deregulating Cellular Energetics	PTK6 Promotes HIF1A Stabilization	reactome	EGFR, GPNMB, HBEGF, HIF1A, LRRK2, PTK6
1370	Deregulating Cellular Energetics	Regulation Of Insulin Secretion	reactome	ABCC8, AHCYL1, ARL2, ARL2BP, CACNA1A, CACNA1C, CACNA1D, CACNA1E, CACNA2D2, CACNB2, CACNB3, GNAI1, GNAI2, INS, ITPR1, ITPR2, ITPR3, KCNJ11, PRKACA, PRKACB, PRKACG, RAPGEF3, RAPGEF4, SLC25A4, SLC25A5, SLC25A6, SLC2A1, SLC2A2, SNAP25, STX1A, STXBP1, SYT5, VAMP2
1567	Deregulating Cellular Energetics	Synthesis, Secretion, And Inactivation Of Glucose Dependent Insulinotropic Polypeptide (GIP)	reactome	DPP4, FFAR1, GATA4, GIP, GPR119, ISL1, PAX6, PCSK1, SEC11A, SEC11C, SPCS1, SPCS2, SPCS3
1750	Deregulating Cellular Energetics	Warburg Effect	smpdb	ACO1, ACO2, ALDOB, CS, DHTKD1, DLAT, DLD, DLST, ENO1, FH, G6PD, GAPDH, GLS2, GLUD1, GPI, HK2, IDH1, IDH3A, IDH3B, IDH3G, LDHA, MDH1, MPC1, PC, PDHA1, PDHB, PFKL, PGAM2, PGD, PGK1, PGLS, PKLR, PKM, RPIA, SDHA, SDHB, SDHC, SDHD, SLC16A1, SLC1A5, SLC2A2, SUCLG1, SUCLG2, TALDO1, TKT
