# Supplementary material for: Pathway-based dissection of the genomic heterogeneity of cancer hallmarks’ acquisition with SLAPenrich
Source: Sci Rep. 2018 Apr 30;8:6713. doi: 10.1038/s41598-018-25076-6 (PMC5928049; doi:10.1038/s41598-018-25076-6)
Supplement: Supplementary file 11 — Supplementary Table S9 [file 41598_2018_25076_MOESM11_ESM.xlsx]

## Sheet: BRCA.csv
Pathway	Internal Id	n.genes.in.rep	total Exonic Content Block length	(E)xpected n.mut in path	(O)bserved n.mut in path	log10 (oddRatio=(O/E))	pval	% FDR	ExclusiveCoverage	Mutated Genes	prob BB12T	prob BB13T	prob BB14T	prob BB16T	prob BB1T	prob BB20T	prob BB21T	prob BB22T	prob BB23T	prob BB24T	prob BB27T	prob BB28T	prob BB29T	prob BB30T	prob BB31T	prob BB32T	prob BB33T	prob BB35T	prob BB38T	prob BB3T	prob BB43T	prob BB4T	prob BB5T	prob BB7T	prob BB9T	prob BR-M-005	prob BR-M-026	prob BR-M-027	prob BR-M-028	prob BR-M-030	prob BR-M-034	prob BR-M-036	prob BR-M-037	prob BR-M-038	prob BR-M-041	prob BR-M-045	prob BR-M-047	prob BR-M-048	prob BR-M-050
Meiotic Synapsis	321	76	311144	99.9178	177	0.24833	4.31716e-14	6.30305e-10	85.3107	SYNE1 (4.252 %) SYNE2 (2.746 %) DIDO1 (1.151 %) SYCP2 (1.151 %) HIST1H2BC (0.531 %) SMC1A (0.531 %) SMC1B (0.531 %) HIST1H2BD (0.354 %) HIST2H2BE (0.354 %) RAD21 (0.354 %) REC8 (0.354 %) SMC3 (0.354 %) TERF2 (0.354 %) HIST1H2AC (0.266 %) HIST1H2AJ (0.266 %) HIST1H2BH (0.266 %) HIST1H4L (0.266 %) HSPA2 (0.266 %) POT1 (0.266 %) STAG3 (0.266 %) SYCP1 (0.266 %) ACD (0.177 %) H2AFZ (0.177 %) HIST1H2AE…	0.0168015	0.0278453	0.00563214	0.00282005	0.00843631	0.00563214	0.00282005	0.0112326	0.0333206	0.00282005	0.0140209	0.00563214	0.00282005	0.00843631	0.00282005	0.0112326	0.00563214	0.00282005	0.00563214	0.00282005	0.00282005	0.00843631	0.0112326	0.0112326	0.0168015	0.0441789	0.0602381	0.124298	0.0549152	0.0495622	0.0441789	0.025096	0.326566	0.0414758	0.12923	0.224435	0.148682	0.0305868	0.0522425
Packaging Of Telomere Ends	213	50	77184	21.2359	62	0.465321	1.58608e-13	1.15784e-09	96.7742	HIST1H2BC (0.531 %) HIST1H2BD (0.354 %) HIST2H2BE (0.354 %) TERF2 (0.354 %) HIST1H2AC (0.266 %) HIST1H2AJ (0.266 %) HIST1H2BH (0.266 %) HIST1H4L (0.266 %) POT1 (0.266 %) ACD (0.177 %) H2AFZ (0.177 %) HIST1H2AE (0.177 %) HIST1H2BB (0.177 %) HIST1H2BE (0.177 %) HIST1H2BF (0.177 %) HIST1H2BG (0.177 %) HIST1H2BJ (0.177 %) HIST1H2BK (0.177 %) HIST1H4E (0.177 %) TERF2IP (0.177 %) H2AFX (0.089 %) HIST1H…	0.00333997	0.00556042	0.00111457	0.000557439	0.00167138	0.00111457	0.000557439	0.00222789	0.00666879	0.000557439	0.00278409	0.00111457	0.000557439	0.00167138	0.000557439	0.00222789	0.00111457	0.000557439	0.00111457	0.000557439	0.000557439	0.00167138	0.00222789	0.00222789	0.00333997	0.00888183	0.0121921	0.0258665	0.0110899	0.00998649	0.00888183	0.00500578	0.075094	0.00832903	0.0269522	0.0489451	0.0312831	0.00611476	0.0105384
Meiotic Recombination	320	85	252206	77.4616	132	0.231488	7.31171e-10	3.55837e-06	88.6364	TEX15 (1.506 %) HIST1H3B (0.886 %) HIST1H2BC (0.531 %) BLM (0.443 %) MLH3 (0.443 %) RAD50 (0.443 %) RAD51C (0.443 %) HIST1H2BD (0.354 %) HIST1H3G (0.354 %) HIST2H2BE (0.354 %) SPO11 (0.354 %) HIST1H2AC (0.266 %) HIST1H2AJ (0.266 %) HIST1H2BH (0.266 %) HIST1H3C (0.266 %) HIST1H3D (0.266 %) HIST1H4L (0.266 %) MRE11A (0.266 %) MSH4 (0.266 %) MSH5 (0.266 %) RAD51 (0.266 %) RBBP8 (0.266 %) TOP3A (0.26…	0.0127782	0.0212061	0.00427766	0.00214112	0.00640963	0.00427766	0.00214112	0.00853703	0.0253931	0.00214112	0.0106599	0.00427766	0.00214112	0.00640963	0.00214112	0.00853703	0.00427766	0.00214112	0.00427766	0.00214112	0.00214112	0.00640963	0.00853703	0.00853703	0.0127782	0.0337133	0.0460607	0.0958326	0.0419625	0.0378468	0.0337133	0.0191059	0.25924	0.0316399	0.0997003	0.175442	0.115006	0.0233018	0.0399069
Wnt Signaling Pathway	302	250	1698044	445.921	521	0.0675796	2.56467e-07	0.000936103	59.6929	FAT3 (2.834 %) PCDH19 (1.417 %) ITPR1 (1.329 %) PCDH15 (1.329 %) SRCAP (1.240 %) FAT1 (1.063 %) PRKCQ (1.063 %) DCHS1 (0.974 %) FAT2 (0.974 %) CDH9 (0.886 %) ITPR3 (0.886 %) PCDHA5 (0.886 %) CDH12 (0.797 %) CDH8 (0.797 %) CELSR1 (0.797 %) CELSR2 (0.797 %) CELSR3 (0.797 %) CREBBP (0.797 %) ITPR2 (0.797 %) PCDHA1 (0.797 %) PCDHA9 (0.797 %) PCDHB7 (0.797 %) PLCB4 (0.797 %) PRKCB (0.797 %) CDH10 (0.7…	0.103052	0.165784	0.0356033	0.017963	0.0529268	0.0356033	0.017963	0.069939	0.195485	0.017963	0.0866457	0.0356033	0.017963	0.0529268	0.017963	0.069939	0.0356033	0.017963	0.0356033	0.017963	0.017963	0.0529268	0.069939	0.069939	0.103052	0.251752	0.32886	0.573411	0.304084	0.278392	0.251752	0.150525	0.92095	0.238065	0.588599	0.804338	0.644133	0.180769	0.291354
DNA Damage/Telomere Stress Induced Senescence	208	64	172030	47.8172	83	0.239494	8.13039e-07	0.00237408	93.9759	HIST1H2BC (0.531 %) CCNA2 (0.443 %) EP400 (0.443 %) RAD50 (0.443 %) HIST1H2BD (0.354 %) HIST2H2BE (0.354 %) TERF2 (0.354 %) HIST1H2AC (0.266 %) HIST1H2AJ (0.266 %) HIST1H2BH (0.266 %) HIST1H4L (0.266 %) MRE11A (0.266 %) POT1 (0.266 %) ACD (0.177 %) CCNE1 (0.177 %) CCNE2 (0.177 %) CDK2 (0.177 %) H2AFZ (0.177 %) HIST1H2AE (0.177 %) HIST1H2BB (0.177 %) HIST1H2BE (0.177 %) HIST1H2BF (0.177 %) HIST1H2…	0.00769181	0.0127868	0.00257054	0.0012861	0.00385333	0.00257054	0.0012861	0.00513447	0.0153245	0.0012861	0.00641397	0.00257054	0.0012861	0.00385333	0.0012861	0.00513447	0.00257054	0.0012861	0.00257054	0.0012861	0.0012861	0.00385333	0.00513447	0.00513447	0.00769181	0.0203803	0.0279153	0.0586926	0.0254101	0.0228984	0.0203803	0.0115155	0.164871	0.0191187	0.0611122	0.109367	0.0707289	0.0140564	0.0241551
Signaling By PDGF	293	27	189830	82.4262	124	0.177357	2.38327e-06	0.00579929	94.3548	COL6A3 (1.594 %) COL6A6 (1.417 %) COL6A5 (0.974 %) COL4A2 (0.797 %) COL4A5 (0.797 %) PDGFRA (0.797 %) COL4A4 (0.620 %) COL9A1 (0.531 %) COL4A1 (0.443 %) PLG (0.443 %) COL6A2 (0.354 %) COL9A3 (0.354 %) THBS1 (0.354 %) THBS3 (0.354 %) THBS4 (0.354 %) PDGFRB (0.266 %) PLAT (0.266 %) SPP1 (0.266 %) COL4A3 (0.177 %) PDGFB (0.177 %) COL6A1 (0.089 %) COL9A2 (0.089 %) FURIN (0.089 %) THBS2 (0.089 %)	0.0136548	0.0226542	0.00457246	0.00228885	0.00685085	0.00457246	0.00228885	0.00912402	0.0271231	0.00228885	0.011392	0.00457246	0.00228885	0.00685085	0.00228885	0.00912402	0.00457246	0.00228885	0.00457246	0.00228885	0.00228885	0.00685085	0.00912402	0.00912402	0.0136548	0.0359996	0.0491628	0.102102	0.0447952	0.0404075	0.0359996	0.0204121	0.274436	0.0337881	0.106208	0.186356	0.122444	0.0248912	0.0426039
Senescence Associated Secretory Phenotype (SASP)	218	108	348601	93.7952	135	0.158153	7.66453e-06	0.015986	87.4074	HIST1H3B (0.886 %) UBC (0.797 %) ANAPC5 (0.531 %) HIST1H2BC (0.531 %) JUN (0.531 %) STAT3 (0.531 %) CCNA2 (0.443 %) EHMT1 (0.443 %) ANAPC1 (0.354 %) ANAPC7 (0.354 %) HIST1H2BD (0.354 %) HIST1H3G (0.354 %) HIST2H2BE (0.354 %) NFKB1 (0.354 %) RPS6KA2 (0.354 %) RPS6KA3 (0.354 %) ANAPC4 (0.266 %) HIST1H2AC (0.266 %) HIST1H2AJ (0.266 %) HIST1H2BH (0.266 %) HIST1H3C (0.266 %) HIST1H3D (0.266 %) HIST1H4…	0.0156896	0.0260124	0.00525746	0.0026322	0.00787582	0.00525746	0.0026322	0.0104873	0.0311331	0.0026322	0.0130919	0.00525746	0.0026322	0.00787582	0.0026322	0.0104873	0.00525746	0.0026322	0.00525746	0.0026322	0.0026322	0.00787582	0.0104873	0.0104873	0.0156896	0.0412938	0.0563356	0.116511	0.0513481	0.0463342	0.0412938	0.0234419	0.30857	0.0387637	0.121156	0.211174	0.139492	0.0285761	0.0488444
Inflammation Mediated By Chemokine And Cytokine Signaling Pathway	227	189	1133314	308.224	366	0.0746141	1.94847e-05	0.0355596	69.1257	COL6A3 (1.594 %) COL12A1 (1.506 %) MYH8 (1.506 %) ITPR1 (1.329 %) VWF (1.240 %) MYH6 (1.151 %) MYO3A (1.151 %) PREX1 (1.151 %) COL14A1 (0.974 %) MYH7 (0.974 %) ITPR3 (0.886 %) MYH1 (0.886 %) MYH10 (0.886 %) MYH4 (0.886 %) MYLK (0.886 %) ITPR2 (0.797 %) MYH2 (0.797 %) PLCB4 (0.797 %) PRKCB (0.797 %) ADCY5 (0.620 %) JAK2 (0.620 %) MYH13 (0.620 %) PIK3CG (0.620 %) PLCG1 (0.620 %) ROCK1 (0.620 %) CAS…	0.0623245	0.101701	0.021222	0.0106679	0.0316636	0.021222	0.0106679	0.0419937	0.120765	0.0106679	0.0522136	0.021222	0.0106679	0.0316636	0.0106679	0.0419937	0.021222	0.0106679	0.021222	0.0106679	0.0106679	0.0316636	0.0419937	0.0419937	0.0623245	0.157687	0.210184	0.395942	0.193059	0.175563	0.157687	0.0920147	0.777211	0.148604	0.408762	0.61912	0.457376	0.111284	0.184358
HDACs Deacetylate Histones	252	94	308405	91.8832	129	0.147353	4.06985e-05	0.066022	88.3721	HIST1H3B (0.886 %) CHD3 (0.620 %) NCOR2 (0.620 %) HDAC1 (0.531 %) HIST1H2BC (0.531 %) HDAC8 (0.354 %) HIST1H2AI (0.354 %) HIST1H2AK (0.354 %) HIST1H2BD (0.354 %) HIST1H3G (0.354 %) HIST2H2BE (0.354 %) TBL1X (0.354 %) ARID4A (0.266 %) HDAC2 (0.266 %) HIST1H2AC (0.266 %) HIST1H2AJ (0.266 %) HIST1H2BH (0.266 %) HIST1H3C (0.266 %) HIST1H3D (0.266 %) HIST1H4L (0.266 %) BRMS1 (0.177 %) GATAD2A (0.177 %…	0.0153447	0.0254435	0.00514129	0.00257396	0.00770202	0.00514129	0.00257396	0.0102562	0.030454	0.00257396	0.0128037	0.00514129	0.00257396	0.00770202	0.00257396	0.0102562	0.00514129	0.00257396	0.00514129	0.00257396	0.00257396	0.00770202	0.0102562	0.0102562	0.0153447	0.0403978	0.0551226	0.114083	0.0502396	0.0453314	0.0403978	0.0229285	0.302895	0.0379214	0.118638	0.207018	0.136624	0.027952	0.0477887
IL 6 Type Cytokine Receptor Ligand Interactions	226	20	82690	36.5127	58	0.200985	0.000407761	0.595331	96.5517	LIFR (0.709 %) JAK2 (0.620 %) IL27RA (0.531 %) IL6ST (0.531 %) JAK1 (0.443 %) TYK2 (0.443 %) IL11RA (0.354 %) OSMR (0.354 %) IL12A (0.266 %) IL12RB2 (0.266 %) CNTFR (0.177 %) IL27 (0.177 %) LIF (0.177 %) CLCF1 (0.089 %) CNTF (0.089 %) IL11 (0.089 %)	0.0058174	0.00967685	0.00194291	0.000971925	0.00291294	0.00194291	0.000971925	0.00388204	0.011601	0.000971925	0.00485019	0.00194291	0.000971925	0.00291294	0.000971925	0.00388204	0.00194291	0.000971925	0.00194291	0.000971925	0.000971925	0.00291294	0.00388204	0.00388204	0.0058174	0.015438	0.0211655	0.0446741	0.0192601	0.0173509	0.015438	0.0087134	0.127276	0.0144801	0.0465302	0.0837956	0.0539186	0.0106394	0.0183059
Integrin Signalling Pathway	73	156	1189525	356.843	403	0.0528282	0.000714029	0.947712	67.9901	COL6A3 (1.594 %) COL12A1 (1.506 %) LAMA2 (1.329 %) TLN1 (1.329 %) FLNB (1.240 %) LAMA3 (1.151 %) LAMB4 (1.151 %) LAMA1 (1.063 %) LAMC1 (1.063 %) COL14A1 (0.974 %) COL5A3 (0.886 %) LAMA4 (0.886 %) LAMB1 (0.886 %) ACTN2 (0.797 %) COL15A1 (0.797 %) COL4A2 (0.797 %) COL4A5 (0.797 %) COL4A6 (0.797 %) COL5A1 (0.797 %) COL1A2 (0.709 %) COL5A2 (0.709 %) LAMA5 (0.709 %) LAMB2 (0.709 %) ACTN4 (0.620 %) COL…	0.0755343	0.122693	0.0258401	0.0130046	0.0385086	0.0258401	0.0130046	0.0510124	0.145363	0.0130046	0.0633536	0.0258401	0.0130046	0.0385086	0.0130046	0.0510124	0.0258401	0.0130046	0.0258401	0.0130046	0.0130046	0.0385086	0.0510124	0.0510124	0.0755343	0.18896	0.250222	0.459481	0.230333	0.209918	0.18896	0.111134	0.84	0.178274	0.473448	0.692134	0.525799	0.134103	0.220192
G2/M DNA Damage Checkpoint// Processing Of DNA Double Strand Break Ends	154	100	464250	138.938	173	0.095226	0.000928362	1.12951	91.3295	HERC2 (1.329 %) BRIP1 (0.886 %) MDC1 (0.886 %) UBC (0.797 %) TOPBP1 (0.620 %) WHSC1 (0.620 %) HIST1H2BC (0.531 %) TP53BP1 (0.531 %) BLM (0.443 %) CCNA2 (0.443 %) PPP4R2 (0.443 %) RAD50 (0.443 %) BRE (0.354 %) DNA2 (0.354 %) HIST1H2BD (0.354 %) HIST2H2BE (0.354 %) TIMELESS (0.354 %) BARD1 (0.266 %) BRCC3 (0.266 %) EXO1 (0.266 %) HIST1H2BH (0.266 %) HIST1H4L (0.266 %) MRE11A (0.266 %) PIAS4 (0.266 …	0.0241591	0.03994	0.00811876	0.00406766	0.0121534	0.00811876	0.00406766	0.0161716	0.0477345	0.00406766	0.0201735	0.00811876	0.00406766	0.0121534	0.00406766	0.0161716	0.00811876	0.00406766	0.00811876	0.00406766	0.00406766	0.0121534	0.0161716	0.0161716	0.0241591	0.0631342	0.085768	0.174338	0.0782848	0.0707404	0.0631342	0.0360189	0.434832	0.0593078	0.181041	0.307076	0.207315	0.0438452	0.0745203
Regulation Of Insulin Secretion	372	33	219142	89.5207	118	0.119958	0.00104281	1.17115	90.678	CACNA1E (2.126 %) ITPR1 (1.329 %) CACNA1A (1.063 %) CACNA1C (1.063 %) ITPR3 (0.886 %) ITPR2 (0.797 %) ABCC8 (0.709 %) CACNA1D (0.709 %) CACNB2 (0.443 %) CACNA2D2 (0.266 %) RAPGEF4 (0.266 %) STXBP1 (0.266 %) CACNB3 (0.177 %) GNAI1 (0.177 %) GNAI2 (0.177 %) PRKACA (0.177 %) PRKACG (0.177 %) SNAP25 (0.177 %) SYT5 (0.177 %) AHCYL1 (0.089 %) ARL2 (0.089 %) RAPGEF3 (0.089 %) SLC25A4 (0.089 %) SLC2A1 (0…	0.0149201	0.0247429	0.00499829	0.00250228	0.00748806	0.00499829	0.00250228	0.0099716	0.0296175	0.00250228	0.0124489	0.00499829	0.00250228	0.00748806	0.00250228	0.0099716	0.00499829	0.00250228	0.00499829	0.00250228	0.00250228	0.00748806	0.0099716	0.0099716	0.0149201	0.0392938	0.0536276	0.111086	0.0488736	0.0440957	0.0392938	0.0222964	0.295846	0.0368838	0.115529	0.201873	0.13308	0.0271832	0.0464876
GRB2:SOS Provides Linkage To MAPK Signaling For Integrins	62	15	118635	39.0848	59	0.178845	0.00122545	1.27797	98.3051	TLN1 (1.329 %) VWF (1.240 %) FGA (0.620 %) ITGB3 (0.531 %) PTK2 (0.354 %) APBB1IP (0.266 %) FGG (0.266 %) ITGA2B (0.266 %) GRB2 (0.177 %) RAP1B (0.177 %) FGB (0.089 %)	0.00624078	0.0103796	0.0020846	0.00104284	0.00312527	0.0020846	0.00104284	0.00416486	0.0124426	0.00104284	0.00520336	0.0020846	0.00104284	0.00312527	0.00104284	0.00416486	0.0020846	0.00104284	0.0020846	0.00104284	0.00104284	0.00312527	0.00416486	0.00416486	0.00624078	0.0165556	0.0226931	0.0478563	0.0206516	0.0186057	0.0165556	0.00934655	0.135907	0.015529	0.0498411	0.0896308	0.0577392	0.0114117	0.0196292
Integrins In Angiogenesis	275	66	566170	193.323	230	0.0754433	0.00139627	1.35904	85.6522	COL6A3 (1.594 %) COL6A6 (1.417 %) TLN1 (1.329 %) COL7A1 (1.240 %) COL6A5 (0.974 %) COL4A2 (0.797 %) COL4A5 (0.797 %) COL4A6 (0.797 %) COL5A1 (0.797 %) COL1A2 (0.709 %) COL5A2 (0.709 %) COL4A4 (0.620 %) ROCK1 (0.620 %) COL1A1 (0.531 %) COL2A1 (0.531 %) ITGAV (0.531 %) ITGB3 (0.531 %) VAV3 (0.531 %) CBL (0.443 %) COL11A1 (0.443 %) COL4A1 (0.443 %) COL6A2 (0.354 %) F11R (0.354 %) IGF1R (0.354 %) KDR…	0.0352456	0.0580498	0.0118893	0.00596245	0.0177809	0.0118893	0.00596245	0.0236373	0.069249	0.00596245	0.0294588	0.0118893	0.00596245	0.0177809	0.00596245	0.0236373	0.0118893	0.00596245	0.0118893	0.00596245	0.00596245	0.0177809	0.0236373	0.0236373	0.0352456	0.0912495	0.123279	0.245027	0.11273	0.102054	0.0912495	0.0523998	0.567097	0.0857986	0.254003	0.416217	0.288853	0.0636662	0.107408
Collagen Degradation	243	39	201008	87.2061	113	0.112531	0.00238312	2.1746	92.0354	COL12A1 (1.506 %) COL14A1 (0.974 %) COL19A1 (0.886 %) COL15A1 (0.797 %) COL18A1 (0.620 %) COL9A1 (0.531 %) COL16A1 (0.443 %) COL17A1 (0.443 %) COL13A1 (0.354 %) COL23A1 (0.354 %) COL25A1 (0.354 %) COL9A3 (0.354 %) ADAM9 (0.266 %) MMP14 (0.266 %) MMP15 (0.266 %) MMP2 (0.266 %) MMP8 (0.266 %) CTSB (0.177 %) MMP1 (0.177 %) MMP11 (0.177 %) MMP3 (0.177 %) MMP9 (0.177 %) ADAM10 (0.089 %) ADAM17 (0.089 …	0.0145056	0.0240589	0.00485877	0.00243235	0.0072793	0.00485877	0.00243235	0.00969394	0.0288008	0.00243235	0.0121027	0.00485877	0.00243235	0.0072793	0.00243235	0.00969394	0.00485877	0.00243235	0.00485877	0.00243235	0.00243235	0.0072793	0.00969394	0.00969394	0.0145056	0.0382156	0.0521668	0.108152	0.047539	0.0428887	0.0382156	0.0216793	0.288901	0.0358705	0.112485	0.196821	0.129609	0.0264328	0.0452167
Constitutive Signaling By Aberrant PI3K In Cancer	19	61	347099	94.4079	120	0.104173	0.00330822	2.84118	91.6667	ERBB3 (1.329 %) ERBB4 (1.063 %) PDGFRA (0.797 %) KL (0.709 %) FGFR2 (0.620 %) CD19 (0.531 %) KIT (0.531 %) FGF6 (0.354 %) GAB1 (0.354 %) KLB (0.354 %) PIK3CD (0.354 %) EGF (0.266 %) FGF23 (0.266 %) FGFR4 (0.266 %) IRS1 (0.266 %) KITLG (0.266 %) NRG1 (0.266 %) PDGFRB (0.266 %) VAV1 (0.266 %) CD86 (0.177 %) FGF3 (0.177 %) FGF7 (0.177 %) FGF9 (0.177 %) GRB2 (0.177 %) NRG3 (0.177 %) PDGFB (0.177 %) P…	0.0158004	0.026195	0.00529477	0.0026509	0.00793164	0.00529477	0.0026509	0.0105615	0.0313511	0.0026509	0.0131844	0.00529477	0.0026509	0.00793164	0.0026509	0.0105615	0.00529477	0.0026509	0.00529477	0.0026509	0.0026509	0.00793164	0.0105615	0.0105615	0.0158004	0.0415815	0.0567248	0.117289	0.0517038	0.0466561	0.0415815	0.0236067	0.310383	0.0390341	0.121963	0.212505	0.140412	0.0287765	0.0491833
RAF/MAP Kinase Cascade	114	116	756250	224.628	259	0.0618357	0.00375252	3.04371	81.4672	SPTA1 (2.569 %) ERBB3 (1.329 %) GRIN2A (1.329 %) SPTB (1.240 %) ERBB4 (1.063 %) GRIN2B (0.974 %) ACTN2 (0.797 %) PDGFRA (0.797 %) SPTBN1 (0.797 %) KL (0.709 %) FGFR2 (0.620 %) JAK2 (0.620 %) KIT (0.531 %) SPTBN2 (0.531 %) SPTBN5 (0.531 %) GRIN2D (0.443 %) JAK1 (0.443 %) JAK3 (0.443 %) NCAM1 (0.443 %) RASGRF1 (0.443 %) SPTBN4 (0.443 %) CAMK2D (0.354 %) FGF6 (0.354 %) GRIN2C (0.354 %) KLB (0.354 %)…	0.042102	0.0691806	0.0142357	0.00714336	0.0212774	0.0142357	0.00714336	0.0282687	0.0824315	0.00714336	0.0352102	0.0142357	0.00714336	0.0212774	0.00714336	0.0282687	0.0142357	0.00714336	0.0142357	0.00714336	0.00714336	0.0212774	0.0282687	0.0282687	0.042102	0.10837	0.145909	0.28605	0.133575	0.121063	0.10837	0.0624836	0.633464	0.101955	0.296214	0.475448	0.335442	0.0758298	0.127342
P130Cas Linkage To MAPK Signaling For Integrins	90	15	117924	43.0987	61	0.150866	0.00431248	3.3138	98.3607	TLN1 (1.329 %) VWF (1.240 %) FGA (0.620 %) ITGB3 (0.531 %) PTK2 (0.354 %) APBB1IP (0.266 %) BCAR1 (0.266 %) FGG (0.266 %) ITGA2B (0.266 %) RAP1B (0.177 %) CRK (0.089 %) FGB (0.089 %)	0.00690514	0.011482	0.00230703	0.00115418	0.00345855	0.00230703	0.00115418	0.00460874	0.0137626	0.00115418	0.0057576	0.00230703	0.00115418	0.00345855	0.00115418	0.00460874	0.00230703	0.00115418	0.00230703	0.00115418	0.00115418	0.00345855	0.00460874	0.00460874	0.00690514	0.0183079	0.0250866	0.0528311	0.0228323	0.0205727	0.0183079	0.0103398	0.149285	0.0171735	0.0550162	0.0987173	0.0637065	0.012623	0.0217031
VEGFR2 Mediated Cell Proliferation	299	21	161672	47.6299	64	0.128301	0.0104457	7.62534	96.875	ITPR1 (1.329 %) ITPR3 (0.886 %) ITPR2 (0.797 %) PRKCB (0.797 %) PLCG1 (0.620 %) KDR (0.354 %) PRKCD (0.266 %) RASA1 (0.266 %) PRKCA (0.177 %) AHCYL1 (0.089 %) CALM2 (0.089 %) CALM3 (0.089 %) HRAS (0.089 %)	0.00766047	0.0127348	0.00256004	0.00128084	0.0038376	0.00256004	0.00128084	0.00511352	0.0152622	0.00128084	0.00638781	0.00256004	0.00128084	0.0038376	0.00128084	0.00511352	0.00256004	0.00128084	0.00256004	0.00128084	0.00128084	0.0038376	0.00511352	0.00511352	0.00766047	0.0202977	0.0278027	0.0584596	0.0253074	0.0228058	0.0202977	0.0114687	0.164255	0.0190413	0.06087	0.108945	0.0704499	0.0139993	0.0240574
Degradation Of The Extracellular Matrix	244	72	425700	149.916	175	0.067189	0.0126477	8.79318	84	LAMA3 (1.151 %) LAMC1 (1.063 %) HSPG2 (0.974 %) LAMB1 (0.886 %) NID1 (0.886 %) ADAMTS9 (0.797 %) LAMA5 (0.709 %) A2M (0.531 %) ADAMTS5 (0.531 %) LAMB3 (0.531 %) TLL2 (0.531 %) ACAN (0.443 %) PLG (0.443 %) ADAMTS16 (0.354 %) ADAMTS18 (0.354 %) BCAN (0.354 %) CAPN1 (0.354 %) CAPN11 (0.354 %) CAPN7 (0.354 %) LAMC2 (0.354 %) ADAMTS1 (0.266 %) BMP1 (0.266 %) CAPN13 (0.266 %) CAPN2 (0.266 %) CAPN9 (0.2…	0.0263167	0.0434753	0.00885033	0.004435	0.0132461	0.00885033	0.004435	0.0176223	0.0519408	0.004435	0.0219792	0.00885033	0.004435	0.0132461	0.004435	0.0176223	0.00885033	0.004435	0.00885033	0.004435	0.004435	0.0132461	0.0176223	0.0176223	0.0263167	0.0686479	0.093158	0.188531	0.0850605	0.0768906	0.0686479	0.0392142	0.463281	0.0644989	0.195712	0.329705	0.22381	0.0477175	0.0809846
Recognition Of DNA Damage By PCNA Containing Replication Complex	216	28	134052	52.8995	68	0.109058	0.0205619	13.6456	98.5294	POLE (1.151 %) UBC (0.797 %) CUL4B (0.709 %) DDB1 (0.443 %) USP1 (0.443 %) DTL (0.354 %) POLD1 (0.354 %) RFC1 (0.354 %) RFC5 (0.266 %) CUL4A (0.177 %) POLD2 (0.177 %) RAD18 (0.177 %) RPA3 (0.177 %) POLD3 (0.089 %) POLE2 (0.089 %) RFC2 (0.089 %) RPA1 (0.089 %) RPA2 (0.089 %) UBA52 (0.089 %)	0.0085461	0.0142029	0.00285685	0.00142945	0.00428222	0.00285685	0.00142945	0.00570555	0.0170192	0.00142945	0.00712684	0.00285685	0.00142945	0.00428222	0.00142945	0.00570555	0.00285685	0.00142945	0.00285685	0.00142945	0.00142945	0.00428222	0.00570555	0.00570555	0.0085461	0.0226276	0.0309803	0.0650219	0.028204	0.0254198	0.0226276	0.0127917	0.181487	0.0212285	0.067693	0.1208	0.0783013	0.015612	0.0268129
Recruitment And ATM Mediated Phosphorylation Of Repair And Signaling Proteins At DNA Double Strand Breaks	326	75	382049	126.973	148	0.0665487	0.0230361	14.6229	93.2432	HERC2 (1.329 %) MDC1 (0.886 %) UBC (0.797 %) BAZ1B (0.709 %) KDM4A (0.620 %) WHSC1 (0.620 %) ABL1 (0.531 %) EYA1 (0.531 %) HIST1H2BC (0.531 %) TP53BP1 (0.531 %) RAD50 (0.443 %) BRE (0.354 %) HIST1H2BD (0.354 %) HIST2H2BE (0.354 %) APBB1 (0.266 %) BARD1 (0.266 %) BRCC3 (0.266 %) EYA3 (0.266 %) EYA4 (0.266 %) HIST1H2BH (0.266 %) HIST1H4L (0.266 %) KDM4B (0.266 %) MRE11A (0.266 %) PIAS4 (0.266 %) HI…	0.0218522	0.0361544	0.00733778	0.00367565	0.0109865	0.00733778	0.00367565	0.0146217	0.0432269	0.00367565	0.0182436	0.00733778	0.00367565	0.0109865	0.00367565	0.0146217	0.00733778	0.00367565	0.00733778	0.00367565	0.00367565	0.0109865	0.0146217	0.0146217	0.0218522	0.0572166	0.0778185	0.158924	0.0710017	0.0641345	0.0572166	0.0325986	0.402821	0.0537384	0.165096	0.282095	0.189333	0.0396972	0.0675744
E2F Transcription Factor Network	312	77	428582	125.155	144	0.060913	0.0361288	21.9783	90.2778	CREBBP (0.797 %) TRRAP (0.797 %) SMARCA2 (0.709 %) TOPBP1 (0.620 %) APAF1 (0.531 %) HDAC1 (0.531 %) POLA1 (0.531 %) RBL1 (0.531 %) CCNA2 (0.443 %) CES5A (0.354 %) E2F1 (0.354 %) E2F4 (0.354 %) E2F8 (0.354 %) RRM2 (0.354 %) TFDP2 (0.354 %) CES1 (0.266 %) KAT2B (0.266 %) PRMT5 (0.266 %) RBBP8 (0.266 %) RBL2 (0.266 %) RRM1 (0.266 %) SERPINE1 (0.266 %) SP1 (0.266 %) XRCC1 (0.266 %) CASP7 (0.177 %) CC…	0.0215056	0.0355852	0.00722056	0.00361682	0.0108113	0.00722056	0.00361682	0.014389	0.0425488	0.00361682	0.0179538	0.00722056	0.00361682	0.0108113	0.00361682	0.014389	0.00722056	0.00361682	0.00722056	0.00361682	0.00361682	0.0108113	0.014389	0.014389	0.0215056	0.0563256	0.0766199	0.156587	0.0699041	0.0631394	0.0563256	0.0320844	0.397865	0.0529001	0.162677	0.27827	0.1866	0.0390733	0.0665279
PIP3 Activates AKT Signaling	104	81	563668	149.142	167	0.049117	0.0554215	32.3662	88.6228	ERBB3 (1.329 %) ERBB4 (1.063 %) PDGFRA (0.797 %) AGO4 (0.709 %) KL (0.709 %) RICTOR (0.709 %) FGFR2 (0.620 %) TNRC6B (0.620 %) AGO1 (0.531 %) AGO2 (0.531 %) CD19 (0.531 %) KIT (0.531 %) TNRC6C (0.443 %) AKT2 (0.354 %) AKT3 (0.354 %) FGF6 (0.354 %) GAB1 (0.354 %) KLB (0.354 %) PIK3CD (0.354 %) TNRC6A (0.354 %) EGF (0.266 %) FGF23 (0.266 %) FGFR4 (0.266 %) IRS1 (0.266 %) KITLG (0.266 %) MOV10 (0.26…	0.0261632	0.0432239	0.00879825	0.00440884	0.0131683	0.00879825	0.00440884	0.0175191	0.0516419	0.00440884	0.0218507	0.00879825	0.00440884	0.0131683	0.00440884	0.0175191	0.00879825	0.00440884	0.00879825	0.00440884	0.00440884	0.0131683	0.0175191	0.0175191	0.0261632	0.0682562	0.0926336	0.187528	0.0845795	0.076454	0.0682562	0.038987	0.461303	0.0641301	0.194676	0.328118	0.222646	0.0474422	0.0805257
Heterotrimeric GPCR Signaling Pathway (through Glutamate// G Alpha Q And PLC Beta) ( GPCR GroupI Metabotropic Glutamate Receptor Signaling Pathway )	66	18	126203	45.2395	56	0.0926701	0.0596135	33.4753	98.2143	PRKCQ (1.063 %) PRKCB (0.797 %) GRM1 (0.620 %) GRM5 (0.620 %) ARAF (0.354 %) GNB3 (0.266 %) PRKCD (0.266 %) PRKCE (0.266 %) PRKCA (0.177 %) PRKCG (0.177 %) PRKCI (0.177 %) GNAQ (0.089 %) PRKCH (0.089 %) RAF1 (0.089 %)	0.00726129	0.0120728	0.00242631	0.00121389	0.00363726	0.00242631	0.00121389	0.00484674	0.0144699	0.00121389	0.00605475	0.00242631	0.00121389	0.00363726	0.00121389	0.00484674	0.00242631	0.00121389	0.00242631	0.00121389	0.00121389	0.00363726	0.00484674	0.00484674	0.00726129	0.0192465	0.026368	0.0554887	0.0239999	0.0216261	0.0192465	0.0108721	0.156376	0.0180545	0.0577804	0.103554	0.0668916	0.0132721	0.0228137
Nonhomologous End Joining (NHEJ)	323	69	350615	120.187	136	0.0536805	0.0629346	34.0313	89.7059	HERC2 (1.329 %) PRKDC (0.974 %) RIF1 (0.974 %) MDC1 (0.886 %) PAXIP1 (0.620 %) WHSC1 (0.620 %) HIST1H2BC (0.531 %) TP53BP1 (0.531 %) DCLRE1C (0.443 %) RAD50 (0.443 %) BRE (0.354 %) HIST1H2BD (0.354 %) HIST2H2BE (0.354 %) BARD1 (0.266 %) BRCC3 (0.266 %) HIST1H2BH (0.266 %) HIST1H4L (0.266 %) LIG4 (0.266 %) MRE11A (0.266 %) PIAS4 (0.266 %) HIST1H2BB (0.177 %) HIST1H2BE (0.177 %) HIST1H2BF (0.177 %)…	0.020564	0.0340378	0.00690218	0.00345707	0.0103354	0.00690218	0.00345707	0.0137567	0.040705	0.00345707	0.0171662	0.00690218	0.00345707	0.0103354	0.00345707	0.0137567	0.00690218	0.00345707	0.00690218	0.00345707	0.00345707	0.0103354	0.0137567	0.0137567	0.020564	0.0539018	0.0733573	0.150208	0.066917	0.060432	0.0539018	0.0306868	0.384197	0.0506197	0.156073	0.267781	0.179133	0.0373772	0.0636801
Oxidative Stress Induced Senescence	212	120	496461	150.48	167	0.0452387	0.0709124	36.9757	88.024	HIST1H3B (0.886 %) UBC (0.797 %) AGO4 (0.709 %) TNRC6B (0.620 %) AGO1 (0.531 %) HIST1H2BC (0.531 %) JUN (0.531 %) TNRC6C (0.443 %) E2F1 (0.354 %) HIST1H2BD (0.354 %) HIST1H3G (0.354 %) HIST2H2BE (0.354 %) TNRC6A (0.354 %) EED (0.266 %) HIST1H2AC (0.266 %) HIST1H2AJ (0.266 %) HIST1H2BH (0.266 %) HIST1H3C (0.266 %) HIST1H3D (0.266 %) HIST1H4L (0.266 %) MAP4K4 (0.266 %) MOV10 (0.266 %) PHC2 (0.266 %…	0.0264285	0.0436583	0.00888826	0.00445405	0.0133027	0.00888826	0.00445405	0.0176975	0.0521585	0.00445405	0.0220727	0.00888826	0.00445405	0.0133027	0.00445405	0.0176975	0.00888826	0.00445405	0.00888826	0.00445405	0.00445405	0.0133027	0.0176975	0.0176975	0.0264285	0.0689329	0.0935396	0.18926	0.0854105	0.0772085	0.0689329	0.0393796	0.464717	0.0647674	0.196466	0.330859	0.224656	0.0479179	0.0813186
PI5P// PP2A And IER3 Regulate PI3K/AKT Signaling	103	83	493126	141.449	156	0.0425232	0.0930965	46.8693	90.3846	ERBB3 (1.329 %) ERBB4 (1.063 %) PDGFRA (0.797 %) KL (0.709 %) FGFR2 (0.620 %) CD19 (0.531 %) INSR (0.531 %) KIT (0.531 %) PIP4K2C (0.531 %) FGF6 (0.354 %) GAB1 (0.354 %) KLB (0.354 %) PIK3CD (0.354 %) PIP5K1C (0.354 %) EGF (0.266 %) FGF23 (0.266 %) FGFR4 (0.266 %) IRS1 (0.266 %) KITLG (0.266 %) NRG1 (0.266 %) PDGFRB (0.266 %) PPP2CB (0.266 %) PPP2R5D (0.266 %) VAV1 (0.266 %) CD86 (0.177 %) FGF3 (…	0.0246493	0.0407436	0.00828487	0.00415105	0.0124015	0.00828487	0.00415105	0.0165011	0.0486909	0.00415105	0.0205836	0.00828487	0.00415105	0.0124015	0.00415105	0.0165011	0.00828487	0.00415105	0.00828487	0.00415105	0.00415105	0.0124015	0.0165011	0.0165011	0.0246493	0.0643886	0.0874507	0.177581	0.0798272	0.07214	0.0643886	0.0367451	0.441419	0.0604886	0.184395	0.312279	0.211089	0.0447255	0.0759916
FOXA1 Transcription Factor Network	313	45	276002	97.8561	110	0.0508047	0.101757	49.5215	87.2727	APOB (1.949 %) NCOA3 (0.886 %) CREBBP (0.797 %) DSCAM (0.797 %) AR (0.620 %) COL18A1 (0.620 %) JUN (0.531 %) PRDM15 (0.443 %) SERPINA1 (0.443 %) NRIP1 (0.354 %) POU2F1 (0.354 %) AP1B1 (0.266 %) ESR1 (0.266 %) NFIC (0.266 %) SP1 (0.266 %) XBP1 (0.266 %) C4BPB (0.177 %) CYP2C18 (0.177 %) FOXA2 (0.177 %) KLK3 (0.177 %) NDUFV3 (0.177 %) NFIB (0.177 %) SFTPD (0.177 %) SOD1 (0.177 %) CCND1 (0.089 %) FO…	0.0164258	0.0272262	0.00550552	0.00275656	0.0082469	0.00550552	0.00275656	0.0109807	0.0325818	0.00275656	0.013707	0.00550552	0.00275656	0.0082469	0.00275656	0.0109807	0.00550552	0.00275656	0.00550552	0.00275656	0.00275656	0.0082469	0.0109807	0.0109807	0.0164258	0.0432047	0.0589209	0.121674	0.0537111	0.0484724	0.0432047	0.0245372	0.320536	0.04056	0.126509	0.219978	0.145587	0.0299077	0.0510953
HDR Through Homologous Recombination (HRR)	316	46	263977	89.1548	100	0.0498554	0.119503	56.2821	94	POLE (1.151 %) BRIP1 (0.886 %) UBC (0.797 %) BLM (0.443 %) RAD50 (0.443 %) RAD51C (0.443 %) DNA2 (0.354 %) POLD1 (0.354 %) RFC1 (0.354 %) BARD1 (0.266 %) EXO1 (0.266 %) MRE11A (0.266 %) RAD51 (0.266 %) RAD51AP1 (0.266 %) RBBP8 (0.266 %) RFC5 (0.266 %) RMI1 (0.266 %) TOP3A (0.266 %) XRCC2 (0.266 %) POLD2 (0.177 %) POLH (0.177 %) RAD51D (0.177 %) RPA3 (0.177 %) WRN (0.177 %) NBN (0.089 %) PALB2 (0.…	0.0148544	0.0246346	0.0049762	0.0024912	0.007455	0.0049762	0.0024912	0.00992763	0.0294882	0.0024912	0.0123941	0.0049762	0.0024912	0.007455	0.0024912	0.00992763	0.0049762	0.0024912	0.0049762	0.0024912	0.0024912	0.007455	0.00992763	0.00992763	0.0148544	0.0391231	0.0533963	0.110622	0.0486623	0.0439046	0.0391231	0.0221987	0.29475	0.0367234	0.115047	0.201075	0.132531	0.0270644	0.0462864
Ephrin B Reverse Signaling	250	26	173242	65.6151	74	0.0522282	0.1515	69.1221	97.2973	PTPN13 (0.974 %) RGS3 (0.709 %) EPHB2 (0.620 %) DNM1 (0.531 %) EPHB1 (0.531 %) ITGB3 (0.531 %) LYN (0.443 %) TIAM1 (0.443 %) ITGA2B (0.266 %) YES1 (0.266 %) BLK (0.177 %) EFNB2 (0.177 %) EPHB4 (0.177 %) FGR (0.177 %) MAPK8 (0.177 %) EFNB1 (0.089 %) FYN (0.089 %) HCK (0.089 %) LCK (0.089 %) MAP3K7 (0.089 %) NCK2 (0.089 %)	0.0107154	0.0177952	0.00358464	0.00179393	0.00537214	0.00358464	0.00179393	0.00715643	0.021316	0.00179393	0.00893752	0.00358464	0.00179393	0.00537214	0.00179393	0.00715643	0.00358464	0.00179393	0.00358464	0.00179393	0.00179393	0.00537214	0.00715643	0.00715643	0.0107154	0.0283199	0.0387319	0.0809276	0.0352737	0.031803	0.0283199	0.01603	0.22227	0.0265736	0.0842222	0.149217	0.0972827	0.0195572	0.0335399
VEGF Signaling Pathway	140	54	365703	112.796	122	0.0340671	0.183037	80.9801	95.082	PRKCQ (1.063 %) PRKCB (0.797 %) PIK3C2B (0.620 %) PIK3CG (0.620 %) PLCG1 (0.620 %) PLA2G4A (0.531 %) PRKD3 (0.531 %) ARAF (0.354 %) KDR (0.354 %) NOS3 (0.354 %) PIK3CD (0.354 %) PLCG2 (0.354 %) PRKD1 (0.354 %) PRKD2 (0.354 %) PTK2 (0.354 %) ETS1 (0.266 %) HIF1A (0.266 %) PIK3C2A (0.266 %) PIK3C3 (0.266 %) PRKCD (0.266 %) PRKCE (0.266 %) SH2D2A (0.266 %) MAPK1 (0.177 %) MAPK14 (0.177 %) MAPK3 (0.1…	0.0191772	0.0317573	0.00643371	0.00322205	0.00963503	0.00643371	0.00322205	0.012826	0.0379867	0.00322205	0.0160068	0.00643371	0.00322205	0.00963503	0.00322205	0.012826	0.00643371	0.00322205	0.00643371	0.00322205	0.00322205	0.00963503	0.012826	0.012826	0.0191772	0.0503255	0.0685376	0.140737	0.0625061	0.0564354	0.0503255	0.0286275	0.363528	0.0472557	0.146266	0.252075	0.168025	0.034877	0.0594757
T Cell Activation	129	60	380090	118.59	127	0.029756	0.20989	88.5378	93.7008	ITPR1 (1.329 %) PRKCQ (1.063 %) PIK3CG (0.620 %) PLCG1 (0.620 %) JUN (0.531 %) VAV3 (0.531 %) PTPRC (0.443 %) AKT2 (0.354 %) AKT3 (0.354 %) ARAF (0.354 %) IKBKB (0.354 %) PAK2 (0.354 %) PIK3CD (0.354 %) PPP3CB (0.354 %) CD3G (0.266 %) LCP2 (0.266 %) PAK3 (0.266 %) PIK3C3 (0.266 %) PPP3CA (0.266 %) VAV1 (0.266 %) WAS (0.266 %) CD86 (0.177 %) CHUK (0.177 %) MAPK1 (0.177 %) MAPK3 (0.177 %) MAPK8 (0.…	0.0202628	0.0335428	0.00680042	0.00340601	0.0101833	0.00680042	0.00340601	0.0135546	0.0401151	0.00340601	0.0169144	0.00680042	0.00340601	0.0101833	0.00340601	0.0135546	0.00680042	0.00340601	0.00680042	0.00340601	0.00340601	0.0101833	0.0135546	0.0135546	0.0202628	0.0531259	0.0723123	0.148159	0.0659604	0.0595651	0.0531259	0.0302398	0.379764	0.0498899	0.153952	0.264397	0.176732	0.0368345	0.0627682
G Beta:gamma Signalling Through PI3Kgamma	58	48	245502	58.7378	65	0.0439957	0.212248	88.5378	98.4615	JAK2 (0.620 %) PIK3CG (0.620 %) JAK1 (0.443 %) JAK3 (0.443 %) AKT2 (0.354 %) AKT3 (0.354 %) GAB2 (0.354 %) PIK3CD (0.354 %) GNB2 (0.266 %) GNB3 (0.266 %) IL3RA (0.266 %) CSF2RB (0.177 %) GRB2 (0.177 %) IL2RB (0.177 %) IL2RG (0.177 %) CSF2RA (0.089 %) GNB1 (0.089 %) GNG10 (0.089 %) GNG11 (0.089 %) GNG4 (0.089 %) IL2 (0.089 %) IL5RA (0.089 %) RHOA (0.089 %) SHC1 (0.089 %)	0.00953644	0.0158435	0.00318897	0.00159576	0.00477964	0.00318897	0.00159576	0.00636777	0.0189819	0.00159576	0.00795337	0.00318897	0.00159576	0.00477964	0.00159576	0.00636777	0.00318897	0.00159576	0.00318897	0.00159576	0.00159576	0.00477964	0.00636777	0.00636777	0.00953644	0.0252288	0.0345247	0.0723127	0.031436	0.0283374	0.0252288	0.0142705	0.200353	0.0236709	0.0752711	0.133881	0.0870105	0.017414	0.0298879
BARD1 Signaling Events	308	29	200354	65.0328	71	0.038126	0.23391	93.1896	95.7746	PRKDC (0.974 %) EWSR1 (0.620 %) FANCA (0.620 %) TOPBP1 (0.620 %) FANCD2 (0.531 %) RAD50 (0.443 %) BARD1 (0.266 %) FANCC (0.266 %) MRE11A (0.266 %) RAD51 (0.266 %) RBBP8 (0.266 %) BACH1 (0.177 %) CCNE1 (0.177 %) CDK2 (0.177 %) FANCE (0.177 %) FANCF (0.177 %) FANCG (0.177 %) XRCC6 (0.177 %) FANCL (0.089 %) NBN (0.089 %) UBE2D3 (0.089 %)	0.0106151	0.0176291	0.00355095	0.00177706	0.0053217	0.00355095	0.00177706	0.0070893	0.0211175	0.00177706	0.00885376	0.00355095	0.00177706	0.0053217	0.00177706	0.0070893	0.00355095	0.00177706	0.00355095	0.00177706	0.00177706	0.0053217	0.0070893	0.0070893	0.0106151	0.0280571	0.0383743	0.0801972	0.0349475	0.0315084	0.0280571	0.0158803	0.220427	0.0263268	0.0834633	0.147922	0.0964125	0.0193749	0.0332295
Glucagon Like Peptide 1 (GLP1) Regulates Insulin Secretion	354	42	248056	81.514	88	0.0332504	0.236165	93.1896	94.3182	ITPR1 (1.329 %) ITPR3 (0.886 %) ITPR2 (0.797 %) ADCY8 (0.709 %) ADCY5 (0.620 %) IQGAP1 (0.443 %) KCNB1 (0.354 %) GLP1R (0.266 %) GNAS (0.266 %) GNB2 (0.266 %) GNB3 (0.266 %) KCNC2 (0.266 %) KCNG2 (0.266 %) RAPGEF4 (0.266 %) KCNS3 (0.177 %) PRKACA (0.177 %) PRKACG (0.177 %) ADCY6 (0.089 %) GCG (0.089 %) GNB1 (0.089 %) GNG10 (0.089 %) GNG11 (0.089 %) GNG4 (0.089 %) PRKAR2A (0.089 %) PRKAR2B (0.089 …	0.0134932	0.0223873	0.0045181	0.00226161	0.0067695	0.0045181	0.00226161	0.0090158	0.0268043	0.00226161	0.011257	0.0045181	0.00226161	0.0067695	0.00226161	0.0090158	0.0045181	0.00226161	0.0045181	0.00226161	0.00226161	0.0067695	0.0090158	0.0090158	0.0134932	0.0355784	0.0485915	0.100949	0.0442734	0.0399358	0.0355784	0.0201713	0.271658	0.0333923	0.105011	0.184354	0.121077	0.0245983	0.042107
HDR Through Single Strand Annealing (SSA)	317	37	210415	68.2586	74	0.0350744	0.247464	95.0784	93.2432	BRIP1 (0.886 %) TOPBP1 (0.620 %) ABL1 (0.531 %) BLM (0.443 %) RAD50 (0.443 %) DNA2 (0.354 %) BARD1 (0.266 %) EXO1 (0.266 %) MRE11A (0.266 %) RAD51 (0.266 %) RBBP8 (0.266 %) RFC5 (0.266 %) RMI1 (0.266 %) TOP3A (0.266 %) ERCC4 (0.177 %) HUS1 (0.177 %) RAD17 (0.177 %) RPA3 (0.177 %) WRN (0.177 %) ERCC1 (0.089 %) NBN (0.089 %) RAD1 (0.089 %) RAD9A (0.089 %) RFC2 (0.089 %) RHNO1 (0.089 %) RPA1 (0.089 …	0.0111722	0.0185509	0.00373802	0.00187076	0.00560179	0.00373802	0.00187076	0.00746208	0.0222196	0.00187076	0.00931888	0.00373802	0.00187076	0.00560179	0.00187076	0.00746208	0.00373802	0.00187076	0.00373802	0.00187076	0.00187076	0.00560179	0.00746208	0.00746208	0.0111722	0.0295159	0.0403583	0.0842466	0.0367577	0.0331436	0.0295159	0.0167114	0.230606	0.0276969	0.0876697	0.155091	0.101235	0.020387	0.0349523
FAS Signaling Pathway	339	37	261087	82.36	88	0.0287661	0.268487	100	89.7727	ERBB3 (1.329 %) ERBB4 (1.063 %) GLI3 (0.886 %) APAF1 (0.531 %) GLI1 (0.531 %) JUN (0.531 %) PARP4 (0.531 %) DFFB (0.266 %) FAF1 (0.266 %) GSN (0.266 %) PARP1 (0.266 %) CASP6 (0.177 %) CASP7 (0.177 %) DAXX (0.177 %) FASLG (0.177 %) LMNA (0.177 %) LMNB1 (0.177 %) MAPK10 (0.177 %) MAPK8 (0.177 %) PARP3 (0.177 %) CAPG (0.089 %) CASP10 (0.089 %) CYC1 (0.089 %) FADD (0.089 %) FAS (0.089 %) MAP3K5 (0.08…	0.013643	0.0226348	0.00456852	0.00228688	0.00684495	0.00456852	0.00228688	0.00911617	0.0271	0.00228688	0.0113822	0.00456852	0.00228688	0.00684495	0.00228688	0.00911617	0.00456852	0.00228688	0.00456852	0.00228688	0.00228688	0.00684495	0.00911617	0.00911617	0.013643	0.0359691	0.0491214	0.102019	0.0447573	0.0403733	0.0359691	0.0203946	0.274235	0.0337594	0.106121	0.186211	0.122345	0.02487	0.0425678
MAP2K And MAPK Activation	78	38	264014	94.4521	100	0.0247882	0.28356	100	92	TLN1 (1.329 %) VWF (1.240 %) CNKSR2 (0.797 %) FGA (0.620 %) ITGB3 (0.531 %) CNKSR1 (0.443 %) IQGAP1 (0.443 %) ARAF (0.354 %) VCL (0.354 %) APBB1IP (0.266 %) FGG (0.266 %) ITGA2B (0.266 %) KSR2 (0.266 %) LAMTOR2 (0.266 %) ARRB1 (0.177 %) IL17RD (0.177 %) KSR1 (0.177 %) MAPK1 (0.177 %) MAPK3 (0.177 %) MARK3 (0.177 %) RAP1B (0.177 %) WDR83 (0.177 %) ARRB2 (0.089 %) FGB (0.089 %) HRAS (0.089 %) MAP2K…	0.0158084	0.0262082	0.00529747	0.00265225	0.00793567	0.00529747	0.00265225	0.0105669	0.0313668	0.00265225	0.0131911	0.00529747	0.00265225	0.00793567	0.00265225	0.0105669	0.00529747	0.00265225	0.00529747	0.00265225	0.00265225	0.00793567	0.0105669	0.0105669	0.0158084	0.0416023	0.056753	0.117346	0.0517295	0.0466793	0.0416023	0.0236186	0.310514	0.0390536	0.122021	0.212601	0.140478	0.0287909	0.0492078
Cytokine Receptor Degradation Signaling ( JAK STAT Pathway And Regulation Pathway Diagram )// Negative Regulation Of (Phosphorylation Of Cytokine Receptor) In JAK STAT Pathway ( JAK STAT Pathway And Regulation Pathway Diagram )	224	41	216776	91.7986	97	0.0239357	0.29435	100	88.6598	LIFR (0.709 %) IL1RAP (0.531 %) IL4R (0.531 %) IL6ST (0.531 %) IL10RB (0.443 %) IL13RA2 (0.443 %) IL1R2 (0.443 %) IL7R (0.443 %) CSF3R (0.354 %) EPOR (0.354 %) IL12RB1 (0.354 %) LEPR (0.354 %) OSMR (0.354 %) GHR (0.266 %) IL10RA (0.266 %) IL12RB2 (0.266 %) IL18R1 (0.266 %) IL3RA (0.266 %) CNTFR (0.177 %) CSF2RB (0.177 %) CXCR1 (0.177 %) IFNGR2 (0.177 %) IL15RA (0.177 %) IL1R1 (0.177 %) IL2RB (0.1…	0.0153295	0.0254183	0.00513616	0.00257139	0.00769434	0.00513616	0.00257139	0.0102459	0.0304239	0.00257139	0.012791	0.00513616	0.00257139	0.00769434	0.00257139	0.0102459	0.00513616	0.00257139	0.00513616	0.00257139	0.00257139	0.00769434	0.0102459	0.0102459	0.0153295	0.0403582	0.055069	0.113976	0.0501906	0.045287	0.0403582	0.0229059	0.302643	0.0378842	0.118526	0.206834	0.136497	0.0279244	0.047742
Downstream Signaling In NaÃ¯ve CD8+ T Cells	25	69	304446	88.9799	93	0.0191912	0.339214	100	87.0968	PRKCQ (1.063 %) PRKCB (0.797 %) STAT4 (0.620 %) JUN (0.531 %) IFNA2 (0.354 %) NFATC2 (0.354 %) B2M (0.266 %) CD3G (0.266 %) NFATC3 (0.266 %) PRF1 (0.266 %) PRKCE (0.266 %) CD8A (0.177 %) ELK1 (0.177 %) EOMES (0.177 %) FASLG (0.177 %) IFNA14 (0.177 %) IFNA4 (0.177 %) IFNA6 (0.177 %) IFNG (0.177 %) IL2RB (0.177 %) IL2RG (0.177 %) MAPK1 (0.177 %) MAPK3 (0.177 %) MAPK8 (0.177 %) PRKCA (0.177 %) PTPN7…	0.0148231	0.0245828	0.00496564	0.00248591	0.0074392	0.00496564	0.00248591	0.00990662	0.0294264	0.00248591	0.0123679	0.00496564	0.00248591	0.0074392	0.00248591	0.00990662	0.00496564	0.00248591	0.00496564	0.00248591	0.00248591	0.0074392	0.00990662	0.00990662	0.0148231	0.0390415	0.0532859	0.1104	0.0485614	0.0438133	0.0390415	0.022152	0.294226	0.0366467	0.114817	0.200693	0.132269	0.0270076	0.0461903
Presynaptic Phase Of Homologous DNA Pairing And Strand Exchange	325	39	234446	72.4353	75	0.015111	0.392213	100	93.3333	BRIP1 (0.886 %) TOPBP1 (0.620 %) BLM (0.443 %) RAD50 (0.443 %) RAD51C (0.443 %) DNA2 (0.354 %) BARD1 (0.266 %) EXO1 (0.266 %) MRE11A (0.266 %) RAD51 (0.266 %) RBBP8 (0.266 %) RFC5 (0.266 %) RMI1 (0.266 %) TOP3A (0.266 %) XRCC2 (0.266 %) HUS1 (0.177 %) RAD17 (0.177 %) RAD51D (0.177 %) RPA3 (0.177 %) WRN (0.177 %) NBN (0.089 %) RAD1 (0.089 %) RAD51B (0.089 %) RAD9A (0.089 %) RFC2 (0.089 %) RHNO1 (0…	0.011898	0.0197513	0.00398184	0.00199291	0.00596681	0.00398184	0.00199291	0.00794783	0.0236545	0.00199291	0.00992489	0.00398184	0.00199291	0.00596681	0.00199291	0.00794783	0.00398184	0.00199291	0.00398184	0.00199291	0.00199291	0.00596681	0.00794783	0.00794783	0.011898	0.0314143	0.0429386	0.0894988	0.0391125	0.0352711	0.0314143	0.0177938	0.243676	0.0294801	0.0931243	0.164346	0.107482	0.0217048	0.0371937
Integrin Signaling Pathway ( Integrin Signaling Pathway )	72	123	1080793	346.294	350	0.004623	0.408657	100	68.8571	COL12A1 (1.506 %) TLN1 (1.329 %) COL7A1 (1.240 %) TNXB (1.151 %) DOCK10 (0.974 %) HSPG2 (0.974 %) TLN2 (0.974 %) TNC (0.974 %) COL19A1 (0.886 %) DOCK4 (0.886 %) VCAN (0.886 %) COL15A1 (0.797 %) COL4A2 (0.797 %) COL4A5 (0.797 %) COL4A6 (0.797 %) COL5A1 (0.797 %) DOCK2 (0.797 %) COL1A2 (0.709 %) COL5A2 (0.709 %) DOCK3 (0.709 %) DOCK7 (0.709 %) COL18A1 (0.620 %) COL4A4 (0.620 %) DOCK8 (0.620 %) ITGA…	0.0725687	0.117998	0.0247995	0.0124776	0.0369676	0.0247995	0.0124776	0.048984	0.139871	0.0124776	0.0608504	0.0247995	0.0124776	0.0369676	0.0124776	0.048984	0.0247995	0.0124776	0.0247995	0.0124776	0.0124776	0.0369676	0.048984	0.048984	0.0725687	0.182004	0.241365	0.445748	0.222072	0.20229	0.182004	0.106854	0.827585	0.171668	0.459493	0.676982	0.511149	0.129003	0.212243
P53 Pathway Feedback Loops 2	164	42	307798	70.3607	72	0.0100021	0.436158	100	97.2222	PIK3C2B (0.620 %) PIK3CG (0.620 %) RBL1 (0.531 %) CCNA2 (0.443 %) PIK3C2G (0.443 %) AKT2 (0.354 %) AKT3 (0.354 %) PIK3CD (0.354 %) PIK3C2A (0.266 %) PIK3C3 (0.266 %) PPP2CB (0.266 %) SIAH1 (0.266 %) TP63 (0.266 %) CCNE1 (0.177 %) CDK2 (0.177 %) CTNNB1 (0.177 %) MAPK13 (0.177 %) MAPK14 (0.177 %) MYC (0.177 %) PPP2CA (0.177 %) TP73 (0.177 %) HRAS (0.089 %)	0.0115369	0.0191541	0.00386051	0.00193212	0.00578517	0.00386051	0.00193212	0.00770612	0.0229407	0.00193212	0.00962335	0.00386051	0.00193212	0.00578517	0.00193212	0.00770612	0.00386051	0.00193212	0.00386051	0.00193212	0.00193212	0.00578517	0.00770612	0.00770612	0.0115369	0.03047	0.0416553	0.0868888	0.0379413	0.0342129	0.03047	0.0172553	0.237199	0.0285931	0.0904138	0.159753	0.104379	0.0210492	0.0360789
Homologous DNA Pairing And Strand Exchange// Resolution Of D Loop Structures Through Synthesis Dependent Strand Annealing (SDSA)	318	26	177440	57.5783	59	0.0105931	0.441782	100	93.2203	BRIP1 (0.886 %) BLM (0.443 %) RAD50 (0.443 %) RAD51C (0.443 %) DNA2 (0.354 %) BARD1 (0.266 %) EXO1 (0.266 %) MRE11A (0.266 %) RAD51 (0.266 %) RAD51AP1 (0.266 %) RBBP8 (0.266 %) RMI1 (0.266 %) TOP3A (0.266 %) XRCC2 (0.266 %) RAD51D (0.177 %) WRN (0.177 %) NBN (0.089 %) PALB2 (0.089 %) RAD51B (0.089 %) RTEL1 (0.089 %)	0.00933899	0.0155165	0.00312274	0.00156259	0.00468045	0.00312274	0.00156259	0.00623573	0.0185908	0.00156259	0.00778857	0.00312274	0.00156259	0.00468045	0.00156259	0.00623573	0.00312274	0.00156259	0.00312274	0.00156259	0.00156259	0.00468045	0.00623573	0.00623573	0.00933899	0.0247106	0.0338188	0.0708631	0.0307922	0.0277561	0.0247106	0.0139757	0.196625	0.0231842	0.0737646	0.131288	0.08528	0.0170548	0.0292754
Dual Incision In TC NER// Gap Filling DNA Repair Synthesis And Ligation In TC NER	311	66	383582	110.855	112	0.00446164	0.468371	100	90.1786	POLE (1.151 %) UBC (0.797 %) CUL4B (0.709 %) ERCC5 (0.709 %) POLR2A (0.620 %) ERCC6 (0.531 %) DDB1 (0.443 %) POLD1 (0.354 %) RFC1 (0.354 %) USP7 (0.354 %) CCNH (0.266 %) LIG3 (0.266 %) POLR2H (0.266 %) RFC5 (0.266 %) TCEA1 (0.266 %) XRCC1 (0.266 %) CDK7 (0.177 %) CUL4A (0.177 %) ERCC3 (0.177 %) ERCC4 (0.177 %) ERCC8 (0.177 %) LIG1 (0.177 %) MNAT1 (0.177 %) POLD2 (0.177 %) POLR2F (0.177 %) POLR2J …	0.018816	0.0311629	0.00631175	0.00316087	0.00945267	0.00631175	0.00316087	0.0125837	0.0372779	0.00316087	0.0157048	0.00631175	0.00316087	0.00945267	0.00316087	0.0125837	0.00631175	0.00316087	0.00631175	0.00316087	0.00316087	0.00945267	0.0125837	0.0125837	0.018816	0.0493925	0.0672791	0.138255	0.0613546	0.0553925	0.0493925	0.0280908	0.358036	0.0463782	0.143694	0.247932	0.16511	0.0342252	0.0583783
Regulation Of RAC1 Activity	260	39	337789	120.851	122	0.00411086	0.469416	100	88.5246	PREX2 (1.33 %) PREX1 (1.15 %) DOCK2 (0.80 %) SPATA13 (0.71 %) ARHGAP9 (0.53 %) EPS8 (0.53 %) VAV3 (0.53 %) CHN2 (0.44 %) RASGRF1 (0.44 %) TIAM1 (0.44 %) ARHGAP17 (0.35 %) ARHGEF25 (0.35 %) ARHGEF6 (0.35 %) MCF2 (0.35 %) RASGRF2 (0.35 %) TIAM2 (0.35 %) ABR (0.27 %) ARHGAP32 (0.27 %) ARHGEF2 (0.27 %) ARHGEF7 (0.27 %) CHN1 (0.27 %) DOCK6 (0.27 %) ELMO1 (0.27 %) RALBP1 (0.27 %) RAP1GDS1 (0.27 %) VAV1…	0.0206893	0.0342437	0.00694453	0.00347832	0.0103987	0.00694453	0.00347832	0.0138408	0.0409505	0.00347832	0.017271	0.00694453	0.00347832	0.0103987	0.00347832	0.0138408	0.00694453	0.00347832	0.00694453	0.00347832	0.00347832	0.0103987	0.0138408	0.0138408	0.0206893	0.0542245	0.0737919	0.151059	0.0673148	0.0607925	0.0542245	0.0308728	0.386032	0.0509233	0.156955	0.269184	0.18013	0.0376029	0.0640593
Validated Nuclear Estrogen Receptor Alpha Network	329	65	420480	148.857	150	0.00332235	0.472394	100	92.6667	C3 (0.886 %) NCOA3 (0.886 %) DSCAM (0.797 %) COL18A1 (0.620 %) NCOR2 (0.620 %) SFI1 (0.620 %) GREB1 (0.531 %) HDAC1 (0.531 %) JUN (0.531 %) NCOA1 (0.531 %) PGR (0.531 %) PRDM15 (0.443 %) ABCA3 (0.354 %) NRIP1 (0.354 %) POU4F2 (0.354 %) SAFB (0.354 %) AP1B1 (0.266 %) APBB1 (0.266 %) DDX17 (0.266 %) ESR1 (0.266 %) MED1 (0.266 %) STAT5A (0.266 %) XBP1 (0.266 %) CHUK (0.177 %) DDX54 (0.177 %) ESR2 (0…	0.0261068	0.0431315	0.0087791	0.00439923	0.0131397	0.0087791	0.00439923	0.0174811	0.051532	0.00439923	0.0218035	0.0087791	0.00439923	0.0131397	0.00439923	0.0174811	0.0087791	0.00439923	0.0087791	0.00439923	0.00439923	0.0131397	0.0174811	0.0174811	0.0261068	0.0681123	0.0924408	0.187159	0.0844027	0.0762934	0.0681123	0.0389034	0.460574	0.0639946	0.194295	0.327534	0.222218	0.047341	0.080357
FOXM1 Transcription Factor Network	314	43	236224	77.2368	78	0.00427056	0.480963	100	92.3077	LAMA4 (0.886 %) CENPF (0.797 %) CREBBP (0.797 %) CCNA2 (0.443 %) ETV5 (0.443 %) CDC25B (0.354 %) ESR1 (0.266 %) FOXM1 (0.266 %) GSK3A (0.266 %) MMP2 (0.266 %) NFATC3 (0.266 %) SP1 (0.266 %) XRCC1 (0.266 %) CCNB1 (0.177 %) CCNE1 (0.177 %) CDK2 (0.177 %) MYC (0.177 %) TGFA (0.177 %) AURKB (0.089 %) CCND1 (0.089 %) CDK4 (0.089 %) CENPB (0.089 %) CKS1B (0.089 %) HIST1H2BA (0.089 %) HSPA1B (0.089 %) M…	0.0127386	0.0211408	0.00426437	0.00213447	0.00638974	0.00426437	0.00213447	0.00851056	0.025315	0.00213447	0.0106269	0.00426437	0.00213447	0.00638974	0.00213447	0.00851056	0.00426437	0.00213447	0.00426437	0.00213447	0.00213447	0.00638974	0.00851056	0.00851056	0.0127386	0.0336101	0.0459206	0.0955489	0.0418347	0.0377312	0.0336101	0.019047	0.258548	0.031543	0.0994059	0.174947	0.11467	0.0232301	0.0397851
Resolution Of D Loop Structures Through Holliday Junction Intermediates	327	33	219945	71.3681	72	0.00382806	0.486761	100	94.4444	BRIP1 (0.886 %) SLX4 (0.531 %) BLM (0.443 %) RAD50 (0.443 %) RAD51C (0.443 %) DNA2 (0.354 %) BARD1 (0.266 %) EXO1 (0.266 %) GEN1 (0.266 %) MRE11A (0.266 %) RAD51 (0.266 %) RAD51AP1 (0.266 %) RBBP8 (0.266 %) RMI1 (0.266 %) TOP3A (0.266 %) XRCC2 (0.266 %) MUS81 (0.177 %) RAD51D (0.177 %) SPIDR (0.177 %) WRN (0.177 %) EME1 (0.089 %) NBN (0.089 %) PALB2 (0.089 %) RAD51B (0.089 %)	0.0117121	0.0194439	0.00391937	0.00196161	0.0058733	0.00391937	0.00196161	0.00782338	0.023287	0.00196161	0.00976965	0.00391937	0.00196161	0.0058733	0.00196161	0.00782338	0.00391937	0.00196161	0.00391937	0.00196161	0.00196161	0.0058733	0.00782338	0.00782338	0.0117121	0.0309282	0.0422781	0.0881559	0.0385096	0.0347264	0.0309282	0.0175166	0.240348	0.0290235	0.0917297	0.161984	0.105886	0.0213673	0.0366199
Regulation Of TP53 Activity Through Phosphorylation	170	89	524830	153.72	154	0.000790416	0.504294	100	88.961	TAF1L (1.240 %) BRIP1 (0.886 %) UBC (0.797 %) TOPBP1 (0.620 %) SUPT16H (0.531 %) BLM (0.443 %) CCNA2 (0.443 %) NUAK1 (0.443 %) RAD50 (0.443 %) SSRP1 (0.443 %) TAF3 (0.443 %) DNA2 (0.354 %) HIPK1 (0.354 %) HIPK2 (0.354 %) PRKAA2 (0.354 %) BARD1 (0.266 %) EXO1 (0.266 %) MDM4 (0.266 %) MRE11A (0.266 %) PLK3 (0.266 %) PRKAG3 (0.266 %) RBBP8 (0.266 %) RFC5 (0.266 %) RMI1 (0.266 %) TOP3A (0.266 %) CDK2…	0.0270735	0.044714	0.00910718	0.00456401	0.0136296	0.00910718	0.00456401	0.0181314	0.053414	0.00456401	0.0226127	0.00910718	0.00456401	0.0136296	0.00456401	0.0181314	0.00910718	0.00456401	0.00910718	0.00456401	0.00456401	0.0136296	0.0181314	0.0181314	0.0270735	0.0705769	0.0957396	0.193458	0.0874287	0.0790414	0.0705769	0.0403341	0.472931	0.0663156	0.200803	0.337477	0.229522	0.049074	0.0832446
Heterotrimeric GPCR Signaling Pathway (through G Alpha I And Pertussis Toxin) ( GPCR Signaling (pertussis Toxin) )// Heterotrimeric GPCR Signaling Pathway (through G Alpha Q// PLC Beta And ERK Cascade) ( GPCR Signaling (G Alpha Q) )// Heterotrimeric GPCR Signaling Pathway (through G Alpha S ACs Epac BRaf And ERKcascade) ( GPCR Signaling (G Alpha S// Epac And ERK) )// Heterotrimeric GPCR Signaling…	65	252	1029106	287.743	288	0.000388135	0.505251	100	73.2639	ADCY9 (1.063 %) PRKCQ (1.063 %) PRKCB (0.797 %) ADCY8 (0.709 %) GRM3 (0.709 %) ADCY10 (0.620 %) ADCY5 (0.620 %) GRM1 (0.620 %) GRM5 (0.620 %) ADCY7 (0.531 %) GRM6 (0.531 %) GRM8 (0.531 %) ADCY1 (0.443 %) GDF9 (0.443 %) GH1 (0.443 %) HGF (0.443 %) INHBA (0.443 %) WNT7A (0.443 %) ARAF (0.354 %) BDNF (0.354 %) BMP3 (0.354 %) FGF6 (0.354 %) FIGF (0.354 %) FZD6 (0.354 %) GRM7 (0.354 %) IFNA2 (0.354 %)…	0.0570941	0.0933342	0.0194055	0.00975029	0.0289666	0.0194055	0.00975029	0.0384344	0.110929	0.00975029	0.04781	0.0194055	0.00975029	0.0289666	0.00975029	0.0384344	0.0194055	0.00975029	0.0194055	0.00975029	0.00975029	0.0289666	0.0384344	0.0384344	0.0570941	0.145099	0.193909	0.36904	0.177957	0.161689	0.145099	0.0844069	0.746335	0.136682	0.381284	0.585976	0.42793	0.102174	0.169863
PDGF Signaling Pathway	95	113	812792	249.41	249	-0.000714644	0.525793	100	83.9357	ITPR1 (1.329 %) ARHGAP5 (0.886 %) ITPR3 (0.886 %) ITPR2 (0.797 %) PDGFRA (0.797 %) JAK2 (0.620 %) PIK3CG (0.620 %) PLCG1 (0.620 %) STAT4 (0.620 %) ARHGAP9 (0.531 %) JUN (0.531 %) PKN2 (0.531 %) STAT3 (0.531 %) STAT5B (0.531 %) VAV3 (0.531 %) ARHGAP12 (0.443 %) JAK1 (0.443 %) JAK3 (0.443 %) AKT2 (0.354 %) ARAF (0.354 %) ARHGAP15 (0.354 %) ERG (0.354 %) ETV3 (0.354 %) IKBKB (0.354 %) MAPK6 (0.354 %…	0.0477948	0.0783821	0.0161924	0.00812924	0.02419	0.0161924	0.00812924	0.0321226	0.0933053	0.00812924	0.0399907	0.0161924	0.00812924	0.02419	0.00812924	0.0321226	0.0161924	0.00812924	0.0161924	0.00812924	0.00812924	0.02419	0.0321226	0.0321226	0.0477948	0.122431	0.164374	0.31862	0.15062	0.136641	0.122431	0.0708287	0.681057	0.115238	0.329653	0.520313	0.372028	0.0858742	0.143659
FGF Signaling Pathway ( FGF Signaling Pathway )	46	44	264279	62.2169	62	-0.0015164	0.531054	100	98.3871	FGFR2 (0.620 %) PLCG1 (0.620 %) ARAF (0.354 %) FGF6 (0.354 %) GAB1 (0.354 %) PIK3CD (0.354 %) PLCG2 (0.354 %) FGF23 (0.266 %) FGFR4 (0.266 %) FRS3 (0.266 %) PRKCD (0.266 %) FGF13 (0.177 %) FGF3 (0.177 %) FGF7 (0.177 %) FGF9 (0.177 %) GRB2 (0.177 %) FGF1 (0.089 %) FGF10 (0.089 %) FGF11 (0.089 %) FGF18 (0.089 %) FGF8 (0.089 %) HRAS (0.089 %) RAF1 (0.089 %)	0.0101312	0.0168282	0.00338853	0.0016957	0.00507848	0.00338853	0.0016957	0.00676557	0.0201597	0.0016957	0.0084498	0.00338853	0.0016957	0.00507848	0.0016957	0.00676557	0.00338853	0.0016957	0.00338853	0.0016957	0.0016957	0.00507848	0.00676557	0.00676557	0.0101312	0.0267889	0.0366487	0.0766673	0.0333732	0.0300866	0.0267889	0.0151582	0.211482	0.0251358	0.079796	0.141649	0.0922053	0.0184954	0.0317313
EPH Ephrin Mediated Repulsion Of Cells	247	48	291890	114.513	113	-0.00577561	0.577597	100	90.2655	EPHA7 (0.709 %) EPHA3 (0.620 %) EPHA5 (0.620 %) EPHB2 (0.620 %) DNM1 (0.531 %) EPHB1 (0.531 %) VAV3 (0.531 %) AP2A1 (0.443 %) AP2A2 (0.443 %) LYN (0.443 %) TIAM1 (0.443 %) AP2M1 (0.354 %) EPHA2 (0.354 %) EPHB3 (0.354 %) EPHB6 (0.354 %) AP2B1 (0.266 %) APH1B (0.266 %) CLTCL1 (0.266 %) EPHA1 (0.266 %) EPHA6 (0.266 %) MMP2 (0.266 %) PSEN2 (0.266 %) YES1 (0.266 %) EFNB2 (0.177 %) EPHA4 (0.177 %) EPHB…	0.0194979	0.0322848	0.00654199	0.00327636	0.00979692	0.00654199	0.00327636	0.0130412	0.0386155	0.00327636	0.0162748	0.00654199	0.00327636	0.00979692	0.00327636	0.0130412	0.00654199	0.00327636	0.00654199	0.00327636	0.00327636	0.00979692	0.0130412	0.0130412	0.0194979	0.0511531	0.0696536	0.142935	0.0635272	0.0573605	0.0511531	0.0291038	0.368365	0.0480342	0.148542	0.255734	0.170605	0.0354553	0.0604489
Interleukin Signaling Pathway	74	86	472862	141.788	140	-0.00551001	0.58183	100	91.4286	STAT4 (0.620 %) IL4R (0.531 %) IL6ST (0.531 %) STAT3 (0.531 %) STAT5B (0.531 %) IL10RB (0.443 %) IL13RA2 (0.443 %) JAK3 (0.443 %) AKT2 (0.354 %) AKT3 (0.354 %) ARAF (0.354 %) IKBKB (0.354 %) IL11RA (0.354 %) IL12RB1 (0.354 %) MAPK6 (0.354 %) NOS3 (0.354 %) RPS6KA2 (0.354 %) RPS6KA3 (0.354 %) RPS6KA6 (0.354 %) IL10RA (0.266 %) IL12RB2 (0.266 %) IRS1 (0.266 %) RASA1 (0.266 %) STAT2 (0.266 %) STAT5A…	0.0247154	0.040852	0.00830728	0.0041623	0.012435	0.00830728	0.0041623	0.0165455	0.0488199	0.0041623	0.020639	0.00830728	0.0041623	0.012435	0.0041623	0.0165455	0.00830728	0.0041623	0.00830728	0.0041623	0.0041623	0.012435	0.0165455	0.0165455	0.0247154	0.0645577	0.0876775	0.178018	0.0800351	0.0723287	0.0645577	0.036843	0.442302	0.0606478	0.184846	0.312978	0.211597	0.0448443	0.0761899
Angiopoietin Receptor Tie2 Mediated Signaling	266	50	313954	104.767	103	-0.00738823	0.590982	100	95.1456	STAT5B (0.531 %) GRB14 (0.443 %) PLG (0.443 %) ANGPT4 (0.354 %) BMX (0.354 %) F2 (0.354 %) GRB7 (0.354 %) ITGB1 (0.354 %) NFKB1 (0.354 %) NOS3 (0.354 %) PLD2 (0.354 %) PTK2 (0.354 %) RPS6KB1 (0.354 %) TEK (0.354 %) ANGPT1 (0.266 %) ETS1 (0.266 %) ITGA5 (0.266 %) MMP2 (0.266 %) RASA1 (0.266 %) STAT5A (0.266 %) AGTR1 (0.177 %) ANGPT2 (0.177 %) ELF2 (0.177 %) ELK1 (0.177 %) FES (0.177 %) GRB2 (0.177…	0.0176901	0.0293094	0.00593183	0.00297033	0.00888454	0.00593183	0.00297033	0.0118285	0.0350673	0.00297033	0.0147637	0.00593183	0.00297033	0.00888454	0.00297033	0.0118285	0.00593183	0.00297033	0.00593183	0.00297033	0.00297033	0.00888454	0.0118285	0.0118285	0.0176901	0.046481	0.0633489	0.130479	0.0577597	0.0521371	0.046481	0.0264175	0.340626	0.0436403	0.135637	0.234884	0.155964	0.0321926	0.0549526
Class I PI3K Signaling Events	16	46	307204	85.7886	84	-0.00915017	0.599583	100	95.2381	PIK3CG (0.620 %) PLCG1 (0.620 %) ARAP3 (0.531 %) BTK (0.531 %) INPPL1 (0.531 %) ITK (0.531 %) LYN (0.443 %) CYTH3 (0.354 %) INPP5D (0.354 %) PLCG2 (0.354 %) PLEKHA1 (0.354 %) SGK1 (0.354 %) SYK (0.266 %) YES1 (0.266 %) ARF1 (0.177 %) BLK (0.177 %) FGR (0.177 %) PLEKHA2 (0.177 %) ZAP70 (0.177 %) ADAP1 (0.089 %) FOXO3 (0.089 %) FYN (0.089 %) HCK (0.089 %) HRAS (0.089 %) HSP90AA1 (0.089 %) LAT (0.08…	0.0142526	0.0236413	0.00477361	0.00238966	0.00715186	0.00477361	0.00238966	0.00952443	0.028302	0.00238966	0.0118913	0.00477361	0.00238966	0.00715186	0.00238966	0.00952443	0.00477361	0.00238966	0.00477361	0.00238966	0.00238966	0.00715186	0.00952443	0.00952443	0.0142526	0.0375569	0.0512742	0.106357	0.0467236	0.0421512	0.0375569	0.0213025	0.284628	0.0352515	0.110623	0.193722	0.127483	0.0259744	0.0444402
P73 Transcription Factor Network	324	79	427589	139.281	137	-0.00717211	0.600701	100	94.1606	FASN (0.620 %) ABL1 (0.531 %) IL1RAP (0.531 %) IL4R (0.531 %) NEDD4L (0.531 %) UBE4B (0.531 %) CCNA2 (0.443 %) ITCH (0.443 %) JAK1 (0.443 %) NTRK1 (0.443 %) SERPINA1 (0.443 %) CASP2 (0.354 %) BCL2L11 (0.266 %) NDUFS2 (0.266 %) PLK3 (0.266 %) PLPP1 (0.266 %) RAD51 (0.266 %) SERPINE1 (0.266 %) SP1 (0.266 %) TP63 (0.266 %) YAP1 (0.266 %) ADA (0.177 %) AFP (0.177 %) BAX (0.177 %) BUB1 (0.177 %) BUB3 …	0.024226	0.0400497	0.00814144	0.00407904	0.0121873	0.00814144	0.00407904	0.0162166	0.0478651	0.00407904	0.0202295	0.00814144	0.00407904	0.0121873	0.00407904	0.0162166	0.00814144	0.00407904	0.00814144	0.00407904	0.00407904	0.0121873	0.0162166	0.0162166	0.024226	0.0633055	0.0859979	0.174781	0.0784955	0.0709315	0.0633055	0.036118	0.435736	0.059469	0.1815	0.307789	0.207831	0.0439654	0.0747212
HIF 1 Alpha Transcription Factor Network	271	67	411122	126.437	124	-0.00845151	0.610357	100	91.9355	CREBBP (0.797 %) ABCB1 (0.709 %) CP (0.620 %) JUN (0.531 %) NCOA1 (0.531 %) TF (0.531 %) ABCG2 (0.354 %) ALDOA (0.354 %) GCK (0.354 %) HK2 (0.354 %) ITGB2 (0.354 %) NOS2 (0.354 %) PGM1 (0.354 %) ARNT (0.266 %) ETS1 (0.266 %) HIF1A (0.266 %) NT5E (0.266 %) PGK1 (0.266 %) PLIN2 (0.266 %) SERPINE1 (0.266 %) SLC2A3 (0.266 %) SP1 (0.266 %) CA9 (0.177 %) CITED2 (0.177 %) CREB1 (0.177 %) EDN1 (0.177 %) …	0.0217498	0.0359862	0.00730313	0.00365826	0.0109347	0.00730313	0.00365826	0.0145529	0.0430265	0.00365826	0.0181579	0.00730313	0.00365826	0.0109347	0.00365826	0.0145529	0.00730313	0.00365826	0.00730313	0.00365826	0.00365826	0.0109347	0.0145529	0.0145529	0.0217498	0.0569533	0.0774643	0.158234	0.0706774	0.0638405	0.0569533	0.0324466	0.40136	0.0534907	0.164382	0.280966	0.188526	0.0395128	0.0672652
MHC Class II Antigen Presentation	200	102	835314	207.129	203	-0.00874485	0.64605	100	81.2808	DYNC2H1 (1.594 %) DYNC1H1 (1.506 %) CENPE (1.063 %) KIF4A (0.886 %) DNM3 (0.709 %) SEC31A (0.709 %) KIF2B (0.620 %) KIF5A (0.620 %) DNM1 (0.531 %) KIF2A (0.531 %) KIF4B (0.531 %) KIF5B (0.531 %) SEC24A (0.531 %) SPTBN2 (0.531 %) AP2A1 (0.443 %) AP2A2 (0.443 %) DYNC1I1 (0.443 %) SEC13 (0.443 %) AP1G1 (0.354 %) AP2M1 (0.354 %) DYNC1LI2 (0.354 %) KIF2C (0.354 %) KIF3B (0.354 %) KIF3C (0.354 %) KLC4 …	0.0382246	0.0628925	0.0129074	0.00647467	0.0192985	0.0129074	0.00647467	0.0256482	0.0749881	0.00647467	0.0319569	0.0129074	0.00647467	0.0192985	0.00647467	0.0256482	0.0129074	0.00647467	0.0129074	0.00647467	0.00647467	0.0192985	0.0256482	0.0256482	0.0382246	0.098713	0.133164	0.263097	0.121829	0.110346	0.098713	0.0567855	0.597235	0.0928395	0.272609	0.44268	0.309443	0.0689599	0.116107
NOTCH1 Intracellular Domain Regulates Transcription	279	47	337216	105.495	102	-0.014631	0.660894	100	92.1569	CREBBP (0.797 %) UBC (0.797 %) NCOR2 (0.620 %) HDAC1 (0.531 %) HDAC9 (0.531 %) HDAC6 (0.443 %) MAML2 (0.443 %) MAML3 (0.443 %) TLE3 (0.443 %) HDAC5 (0.354 %) HDAC8 (0.354 %) MAMLD1 (0.354 %) TBL1X (0.354 %) TLE1 (0.354 %) HDAC2 (0.266 %) HIF1A (0.266 %) KAT2B (0.266 %) CCNC (0.177 %) CDK8 (0.177 %) HDAC3 (0.177 %) HDAC4 (0.177 %) HEY1 (0.177 %) HEYL (0.177 %) MAML1 (0.177 %) MYC (0.177 %) HDAC10 …	0.0178241	0.02953	0.00597702	0.00299299	0.00895212	0.00597702	0.00299299	0.0119183	0.0353305	0.00299299	0.0148756	0.00597702	0.00299299	0.00895212	0.00299299	0.0119183	0.00597702	0.00299299	0.00597702	0.00299299	0.00299299	0.00895212	0.0119183	0.0119183	0.0178241	0.0468277	0.0638172	0.131408	0.0581879	0.0525249	0.0468277	0.0266167	0.342721	0.0439663	0.136599	0.236447	0.157057	0.0324346	0.0553606
Glycolysis / Gluconeogenesis	356	49	209810	80.258	77	-0.0179976	0.669002	100	94.8052	OGDHL (0.443 %) PKLR (0.443 %) GCK (0.354 %) HK2 (0.354 %) HK3 (0.354 %) OGDH (0.354 %) PCK2 (0.354 %) PGM1 (0.354 %) ADH7 (0.266 %) GPI (0.266 %) NME5 (0.266 %) NME7 (0.266 %) PFKP (0.266 %) ADPGK (0.177 %) ALDOC (0.177 %) DLD (0.177 %) ENO1 (0.177 %) ENO3 (0.177 %) G6PC2 (0.177 %) HK1 (0.177 %) NME6 (0.177 %) TPI1 (0.177 %) ADH1A (0.089 %) ADH1B (0.089 %) ADH5 (0.089 %) ADH6 (0.089 %) AKR1A1 (0…	0.013271	0.0220204	0.0044434	0.00222417	0.00665768	0.0044434	0.00222417	0.00886705	0.026366	0.00222417	0.0110715	0.0044434	0.00222417	0.00665768	0.00222417	0.00886705	0.0044434	0.00222417	0.0044434	0.00222417	0.00222417	0.00665768	0.00886705	0.00886705	0.013271	0.0349992	0.0478058	0.0993625	0.0435559	0.0392871	0.0349992	0.0198404	0.267821	0.0328481	0.103364	0.181595	0.119195	0.0241956	0.0414239
ErbB2/ErbB3 Signaling Events	37	41	294955	80.2811	77	-0.0181228	0.669999	100	97.4026	ERBB3 (1.329 %) DOCK7 (0.709 %) JAK2 (0.620 %) JUN (0.531 %) STAT3 (0.531 %) NFATC4 (0.354 %) PPP3CB (0.354 %) CHRNA1 (0.266 %) NRG1 (0.266 %) RNF41 (0.266 %) GRB2 (0.177 %) MAPK1 (0.177 %) MAPK10 (0.177 %) MAPK3 (0.177 %) MAPK8 (0.177 %) PRKACA (0.177 %) PTPN11 (0.177 %) HRAS (0.089 %) MAP2K1 (0.089 %) MAP2K2 (0.089 %) RAF1 (0.089 %) SHC1 (0.089 %) USP8 (0.089 %)	0.0132751	0.0220272	0.00444477	0.00222486	0.00665974	0.00444477	0.00222486	0.00886979	0.026374	0.00222486	0.0110749	0.00444477	0.00222486	0.00665974	0.00222486	0.00886979	0.00444477	0.00222486	0.00444477	0.00222486	0.00222486	0.00665974	0.00886979	0.00886979	0.0132751	0.0350099	0.0478203	0.0993918	0.0435692	0.0392991	0.0350099	0.0198465	0.267892	0.0328581	0.103395	0.181646	0.11923	0.024203	0.0414365
Warburg Effect	374	45	216985	65.9833	63	-0.0200935	0.670089	100	96.8254	PC (0.531 %) PKLR (0.443 %) G6PD (0.354 %) HK2 (0.354 %) SLC16A1 (0.354 %) ACO2 (0.266 %) GPI (0.266 %) IDH3B (0.266 %) PGK1 (0.266 %) ALDOB (0.177 %) CS (0.177 %) DHTKD1 (0.177 %) DLD (0.177 %) DLST (0.177 %) ENO1 (0.177 %) IDH3G (0.177 %) PDHA1 (0.177 %) PGD (0.177 %) PGLS (0.177 %) TKT (0.177 %) GAPDH (0.089 %) IDH3A (0.089 %) MPC1 (0.089 %) PDHB (0.089 %) PGAM2 (0.089 %) PKM (0.089 %) SDHA (0…	0.0107789	0.0179003	0.00360596	0.00180461	0.00540407	0.00360596	0.00180461	0.00719893	0.0214417	0.00180461	0.00899055	0.00360596	0.00180461	0.00540407	0.00180461	0.00719893	0.00360596	0.00180461	0.00360596	0.00180461	0.00180461	0.00540407	0.00719893	0.00719893	0.0107789	0.0284862	0.0389581	0.0813897	0.0354801	0.0319895	0.0284862	0.0161247	0.223434	0.0267299	0.0847022	0.150036	0.0978331	0.0196726	0.0337364
Insulin/IGF Pathway Protein Kinase B Signaling Cascade	365	22	190830	68.1523	64	-0.0273006	0.721342	100	92.1875	INSRR (1.063 %) IRS4 (0.797 %) IGF2R (0.531 %) INPPL1 (0.531 %) INSR (0.531 %) TSC1 (0.443 %) IGF1R (0.354 %) TSC2 (0.354 %) GSK3A (0.266 %) IGF1 (0.266 %) IRS1 (0.266 %) MDM4 (0.266 %) MDM2 (0.177 %) FOXO1 (0.089 %) FOXO3 (0.089 %) GSK3B (0.089 %)	0.0111538	0.0185205	0.00373184	0.00186767	0.00559254	0.00373184	0.00186767	0.00744976	0.0221832	0.00186767	0.00930351	0.00373184	0.00186767	0.00559254	0.00186767	0.00744976	0.00373184	0.00186767	0.00373184	0.00186767	0.00186767	0.00559254	0.00744976	0.00744976	0.0111538	0.0294677	0.0402928	0.0841131	0.0366979	0.0330896	0.0294677	0.016684	0.230272	0.0276517	0.087531	0.154855	0.101076	0.0203535	0.0348954
VEGFR1 Specific Signals	298	29	230519	70.0876	65	-0.0327276	0.758316	100	95.3846	NRP1 (0.974 %) PRKCB (0.797 %) NRP2 (0.709 %) PLCG1 (0.620 %) CBL (0.443 %) NOS3 (0.354 %) FLT1 (0.266 %) HIF1A (0.266 %) RASA1 (0.266 %) MAPK1 (0.177 %) MAPK3 (0.177 %) PRKACA (0.177 %) PRKCA (0.177 %) PTPN11 (0.177 %) CALM2 (0.089 %) CALM3 (0.089 %) HSP90AA1 (0.089 %) NCK1 (0.089 %) SHC2 (0.089 %)	0.0114894	0.0190756	0.00384457	0.00192414	0.00576131	0.00384457	0.00192414	0.00767436	0.0228468	0.00192414	0.00958372	0.00384457	0.00192414	0.00576131	0.00192414	0.00767436	0.00384457	0.00192414	0.00384457	0.00192414	0.00192414	0.00576131	0.00767436	0.00767436	0.0114894	0.0303459	0.0414866	0.0865453	0.0377873	0.0340738	0.0303459	0.0171845	0.236344	0.0284765	0.0900571	0.159147	0.10397	0.020963	0.0359323
ATF 2 Transcription Factor Network	304	59	352678	89.4465	83	-0.032485	0.784562	100	95.1807	PDGFRA (0.797 %) COL24A1 (0.620 %) PPARGC1A (0.620 %) JUN (0.531 %) CCNA2 (0.443 %) NOS2 (0.354 %) POU2F1 (0.354 %) DUSP10 (0.266 %) ESR1 (0.266 %) MMP2 (0.266 %) ARG1 (0.177 %) ATF2 (0.177 %) CREB1 (0.177 %) CUL3 (0.177 %) IFNG (0.177 %) MAPK1 (0.177 %) MAPK14 (0.177 %) MAPK3 (0.177 %) MAPK8 (0.177 %) PLAU (0.177 %) PRKCA (0.177 %) SELE (0.177 %) TH (0.177 %) ACHE (0.089 %) ATF3 (0.089 %) BCL2L1…	0.0149067	0.0247209	0.00499381	0.00250003	0.00748135	0.00499381	0.00250003	0.00996267	0.0295912	0.00250003	0.0124378	0.00499381	0.00250003	0.00748135	0.00250003	0.00996267	0.00499381	0.00250003	0.00499381	0.00250003	0.00250003	0.00748135	0.00996267	0.00996267	0.0149067	0.0392591	0.0535806	0.110991	0.0488307	0.0440569	0.0392591	0.0222766	0.295623	0.0368512	0.115431	0.201711	0.132969	0.0271591	0.0464468
Oncogene Induced Senescence	211	30	213326	73.3686	67	-0.0394352	0.802387	100	97.0149	UBC (0.797 %) AGO4 (0.709 %) TNRC6B (0.620 %) AGO1 (0.531 %) ETS2 (0.443 %) TNRC6C (0.443 %) E2F1 (0.354 %) TNRC6A (0.354 %) ETS1 (0.266 %) MOV10 (0.266 %) SP1 (0.266 %) MAPK1 (0.177 %) MAPK3 (0.177 %) MDM2 (0.177 %) CDK4 (0.089 %) CDK6 (0.089 %) E2F3 (0.089 %) ERF (0.089 %) ID1 (0.089 %) UBA52 (0.089 %)	0.0120609	0.0200206	0.00403657	0.00202032	0.00604874	0.00403657	0.00202032	0.00805684	0.0239763	0.00202032	0.0100609	0.00403657	0.00202032	0.00604874	0.00202032	0.00805684	0.00403657	0.00202032	0.00403657	0.00202032	0.00202032	0.00604874	0.00805684	0.00805684	0.0120609	0.03184	0.0435168	0.0906737	0.0396403	0.035748	0.03184	0.0180367	0.246579	0.02988	0.0943443	0.16641	0.108879	0.0220004	0.0376961
SUMOylation Of DNA Damage Response And Repair Proteins	328	76	581162	201.794	192	-0.0216076	0.803028	100	88.0208	HERC2 (1.329 %) NUP160 (1.240 %) TPR (1.151 %) MDC1 (0.886 %) NUP153 (0.709 %) NUP214 (0.709 %) RANBP2 (0.709 %) NUP210 (0.531 %) NUP93 (0.531 %) SMC1A (0.531 %) SMC6 (0.531 %) SP100 (0.531 %) BLM (0.443 %) NUP205 (0.443 %) NUP155 (0.354 %) RAD21 (0.354 %) SMC3 (0.354 %) NDC1 (0.266 %) NSMCE4A (0.266 %) NUP188 (0.266 %) NUP35 (0.266 %) NUPL2 (0.266 %) PARP1 (0.266 %) PHC2 (0.266 %) PHC3 (0.266 %)…	0.0370652	0.061009	0.012511	0.00627516	0.0187076	0.012511	0.00627516	0.0248654	0.0727566	0.00627516	0.0309845	0.012511	0.00627516	0.0187076	0.00627516	0.0248654	0.012511	0.00627516	0.012511	0.00627516	0.00627516	0.0187076	0.0248654	0.0248654	0.0370652	0.0958129	0.129327	0.25611	0.118296	0.107125	0.0958129	0.0550794	0.585752	0.0901032	0.265417	0.432517	0.301494	0.0669013	0.112728
Insulin/IGF Pathway Mitogen Activated Protein Kinase Kinase/MAP Kinase Cascade	70	29	221320	87.1423	80	-0.0371391	0.810326	100	95	INSRR (1.063 %) IRS4 (0.797 %) IGF2R (0.531 %) INSR (0.531 %) IGF1R (0.354 %) RPS6KA2 (0.354 %) RPS6KA3 (0.354 %) RPS6KA5 (0.354 %) RPS6KA6 (0.354 %) RPS6KB1 (0.354 %) RPS6KB2 (0.354 %) IGF1 (0.266 %) IRS1 (0.266 %) RASA1 (0.266 %) ELK1 (0.177 %) MAP2K3 (0.177 %) MAPK1 (0.177 %) MAPK3 (0.177 %) RPS6KA1 (0.177 %) MAP2K1 (0.089 %) MAP2K2 (0.089 %) RAF1 (0.089 %) RPS6KA4 (0.089 %)	0.0144942	0.0240401	0.00485494	0.00243042	0.00727356	0.00485494	0.00243042	0.0096863	0.0287783	0.00243042	0.0120932	0.00485494	0.00243042	0.00727356	0.00243042	0.0096863	0.00485494	0.00243042	0.00485494	0.00243042	0.00243042	0.00727356	0.0096863	0.0096863	0.0144942	0.0381859	0.0521266	0.108071	0.0475023	0.0428554	0.0381859	0.0216623	0.288709	0.0358426	0.112401	0.196682	0.129513	0.0264121	0.0451817
Insulin Processing	361	26	170405	70.7169	64	-0.0433432	0.818562	100	87.5	MYO5A (0.797 %) KIF5A (0.620 %) KIF5B (0.531 %) EXOC7 (0.443 %) EXOC2 (0.354 %) EXOC6 (0.354 %) KIF5C (0.354 %) SLC30A5 (0.354 %) CPN1 (0.266 %) ERO1A (0.266 %) ERO1B (0.266 %) EXOC1 (0.266 %) EXOC3 (0.266 %) PCSK2 (0.266 %) SLC30A8 (0.266 %) EXOC4 (0.177 %) EXOC5 (0.177 %) CPE (0.089 %) PCSK1 (0.089 %) RAB27A (0.089 %) SLC30A6 (0.089 %)	0.0115988	0.0192565	0.00388131	0.00194254	0.00581631	0.00388131	0.00194254	0.00774755	0.0230631	0.00194254	0.00967504	0.00388131	0.00194254	0.00581631	0.00194254	0.00774755	0.00388131	0.00194254	0.00388131	0.00194254	0.00194254	0.00581631	0.00774755	0.00774755	0.0115988	0.0306319	0.0418754	0.0873367	0.0381422	0.0343943	0.0306319	0.0173476	0.238314	0.0287452	0.090879	0.160542	0.104911	0.0211616	0.0362701
Validated Targets Of C MYC Transcriptional Activation	138	80	453731	142.162	133	-0.0289306	0.818737	100	90.2256	HUWE1 (1.949 %) CREBBP (0.797 %) TRRAP (0.797 %) HSPD1 (0.709 %) IREB2 (0.443 %) NCL (0.443 %) BCAT1 (0.354 %) DKC1 (0.354 %) EIF4A1 (0.354 %) HSPA4 (0.354 %) KIR3DL1 (0.354 %) GPAM (0.266 %) MYCT1 (0.266 %) PFKM (0.266 %) SERPINI1 (0.266 %) UBTF (0.266 %) BAX (0.177 %) BMI1 (0.177 %) CCNB1 (0.177 %) DDX18 (0.177 %) EIF2S1 (0.177 %) ENO1 (0.177 %) MINA (0.177 %) MMP9 (0.177 %) MYC (0.177 %) PEG10…	0.0247886	0.040972	0.00833209	0.00417476	0.0124721	0.00833209	0.00417476	0.0165948	0.0489627	0.00417476	0.0207002	0.00833209	0.00417476	0.0124721	0.00417476	0.0165948	0.00833209	0.00417476	0.00833209	0.00417476	0.00417476	0.0124721	0.0165948	0.0165948	0.0247886	0.0647449	0.0879286	0.178501	0.0802653	0.0725376	0.0647449	0.0369515	0.443278	0.0608241	0.185346	0.313751	0.212159	0.0449757	0.0764095
Negative Regulators Of RIG I/MDA5 Signaling	202	34	193867	78.1307	71	-0.0415633	0.821573	100	95.7746	UBC (0.797 %) ITCH (0.443 %) HERC5 (0.354 %) IFIH1 (0.354 %) MAVS (0.354 %) PCBP2 (0.354 %) TBK1 (0.354 %) UBA7 (0.354 %) IRF3 (0.266 %) NLRC5 (0.266 %) RNF135 (0.266 %) TAX1BP1 (0.266 %) TRAF3 (0.266 %) TRIM25 (0.266 %) UBE2D2 (0.266 %) IKBKE (0.177 %) RNF125 (0.177 %) TNFAIP3 (0.177 %) ATG5 (0.089 %) CYLD (0.089 %) DDX58 (0.089 %) NLRX1 (0.089 %) OTUD5 (0.089 %) RNF216 (0.089 %) UBA52 (0.089 %)…	0.0128959	0.0214006	0.00431724	0.00216096	0.00646887	0.00431724	0.00216096	0.00861585	0.0256255	0.00216096	0.0107582	0.00431724	0.00216096	0.00646887	0.00216096	0.00861585	0.00431724	0.00216096	0.00431724	0.00216096	0.00216096	0.00646887	0.00861585	0.00861585	0.0128959	0.0340205	0.0464777	0.0966768	0.0423433	0.0381909	0.0340205	0.0192813	0.261298	0.0319286	0.100577	0.176916	0.116008	0.0235153	0.0402693
IL2 Signaling Events Mediated By PI3K	68	38	227344	64.7012	58	-0.0474844	0.827838	100	98.2759	JAK1 (0.443 %) JAK3 (0.443 %) E2F1 (0.354 %) EIF3A (0.354 %) GAB2 (0.354 %) NFATC2 (0.354 %) NFKB1 (0.354 %) RPS6KB1 (0.354 %) GRB2 (0.177 %) IL2RB (0.177 %) IL2RG (0.177 %) MYC (0.177 %) PTPN11 (0.177 %) TERT (0.177 %) BCL2L1 (0.089 %) CALM2 (0.089 %) CALM3 (0.089 %) FOXO3 (0.089 %) HSP90AA1 (0.089 %) IL2 (0.089 %) LCK (0.089 %) RELA (0.089 %) RPS6 (0.089 %) SGMS1 (0.089 %) SHC1 (0.089 %) SMPD1 …	0.010558	0.0175346	0.00353179	0.00176745	0.005293	0.00353179	0.00176745	0.0070511	0.0210045	0.00176745	0.00880609	0.00353179	0.00176745	0.005293	0.00176745	0.0070511	0.00353179	0.00176745	0.00353179	0.00176745	0.00176745	0.005293	0.0070511	0.0070511	0.010558	0.0279075	0.0381708	0.0797812	0.0347618	0.0313407	0.0279075	0.0157951	0.219377	0.0261863	0.0830313	0.147184	0.0959169	0.0192711	0.0330528
FCERI Mediated MAPK Activation	44	40	193941	64.9097	58	-0.0488816	0.834629	100	96.5517	PLCG1 (0.620 %) JUN (0.531 %) VAV3 (0.531 %) LYN (0.443 %) PAK2 (0.354 %) PLCG2 (0.354 %) LCP2 (0.266 %) SYK (0.266 %) VAV1 (0.266 %) GRB2 (0.177 %) MAP2K7 (0.177 %) MAPK1 (0.177 %) MAPK10 (0.177 %) MAPK3 (0.177 %) MAPK8 (0.177 %) VAV2 (0.177 %) GRAP2 (0.089 %) HRAS (0.089 %) LAT (0.089 %) PAK1 (0.089 %) SHC1 (0.089 %)	0.0105939	0.017594	0.00354384	0.00177349	0.00531104	0.00354384	0.00177349	0.00707512	0.0210755	0.00177349	0.00883606	0.00354384	0.00177349	0.00531104	0.00177349	0.00707512	0.00354384	0.00177349	0.00354384	0.00177349	0.00177349	0.00531104	0.00707512	0.00707512	0.0105939	0.0280015	0.0382988	0.0800428	0.0348785	0.0314461	0.0280015	0.0158487	0.220037	0.0262746	0.0833029	0.147648	0.0962285	0.0193363	0.0331639
Constitutive Signaling By NOTCH1 HD+PEST Domain Mutants// Constitutive Signaling By NOTCH1 PEST Domain Mutants	269	57	395793	126.813	117	-0.0349772	0.845933	100	93.1624	CREBBP (0.797 %) UBC (0.797 %) NCOR2 (0.620 %) HDAC1 (0.531 %) HDAC9 (0.531 %) MIB1 (0.531 %) HDAC6 (0.443 %) MAML2 (0.443 %) MAML3 (0.443 %) HDAC5 (0.354 %) HDAC8 (0.354 %) MAMLD1 (0.354 %) TBL1X (0.354 %) APH1B (0.266 %) DLL1 (0.266 %) HDAC2 (0.266 %) JAG1 (0.266 %) KAT2B (0.266 %) PSEN2 (0.266 %) CCNC (0.177 %) CDK8 (0.177 %) DLL4 (0.177 %) HDAC3 (0.177 %) HDAC4 (0.177 %) HEY1 (0.177 %) HEYL (…	0.0218215	0.036104	0.0073274	0.00367044	0.0109709	0.0073274	0.00367044	0.0146011	0.0431669	0.00367044	0.018218	0.0073274	0.00367044	0.0109709	0.00367044	0.0146011	0.0073274	0.00367044	0.0073274	0.00367044	0.00367044	0.0109709	0.0146011	0.0146011	0.0218215	0.0571377	0.0777124	0.158718	0.0709046	0.0640465	0.0571377	0.0325531	0.402384	0.0536643	0.164882	0.281757	0.189091	0.039642	0.0674818
ATR Signaling Pathway	306	39	230819	78.178	70	-0.0479868	0.853594	100	95.7143	TOPBP1 (0.620 %) CEP164 (0.531 %) FANCD2 (0.531 %) CCNA2 (0.443 %) MCM7 (0.354 %) TIMELESS (0.354 %) RAD51 (0.266 %) RFC5 (0.266 %) SMARCAL1 (0.266 %) TIPIN (0.266 %) BTRC (0.177 %) CDC25C (0.177 %) CDC6 (0.177 %) CDK2 (0.177 %) HUS1 (0.177 %) MDM2 (0.177 %) PPP2CA (0.177 %) PPP2R1A (0.177 %) RAD17 (0.177 %) CDC25A (0.089 %) MCM2 (0.089 %) NBN (0.089 %) PLK1 (0.089 %) RAD1 (0.089 %) RAD9A (0.089 …	0.0129042	0.0214144	0.00432005	0.00216236	0.00647307	0.00432005	0.00216236	0.00862143	0.0256419	0.00216236	0.0107651	0.00432005	0.00216236	0.00647307	0.00216236	0.00862143	0.00432005	0.00216236	0.00432005	0.00216236	0.00216236	0.00647307	0.00862143	0.00862143	0.0129042	0.0340423	0.0465072	0.0967365	0.0423702	0.0382153	0.0340423	0.0192938	0.261444	0.031949	0.100639	0.17702	0.116079	0.0235305	0.040295
Angiogenesis	8	141	980324	274.049	260	-0.0228548	0.863724	100	80	PTPRB (1.151 %) PRKCQ (1.063 %) PDGFRA (0.797 %) PRKCB (0.797 %) EPHB2 (0.620 %) NOTCH4 (0.620 %) PIK3C2B (0.620 %) PIK3CG (0.620 %) PLCG1 (0.620 %) EPHB1 (0.531 %) JUN (0.531 %) PLA2G4A (0.531 %) PLD1 (0.531 %) PRKD3 (0.531 %) STAT3 (0.531 %) GRB14 (0.443 %) JAK1 (0.443 %) RBPJL (0.443 %) WNT7A (0.443 %) AKT2 (0.354 %) AKT3 (0.354 %) ARAF (0.354 %) EPHB3 (0.354 %) GRB7 (0.354 %) KDR (0.354 %) NO…	0.0537007	0.0878893	0.0182306	0.00915721	0.0272208	0.0182306	0.00915721	0.0361288	0.104518	0.00915721	0.0449552	0.0182306	0.00915721	0.0272208	0.00915721	0.0361288	0.0182306	0.00915721	0.0182306	0.00915721	0.00915721	0.0272208	0.0361288	0.0361288	0.0537007	0.13687	0.183221	0.351032	0.168054	0.152606	0.13687	0.0794598	0.724155	0.128893	0.362863	0.563054	0.408069	0.0962417	0.160365
TGF Beta Super Family Signaling Pathway(canonical) ( TGF Beta BMP Diagram(MolecularVariation) )	181	51	330075	102.672	93	-0.0429673	0.863952	100	91.3978	CREBBP (0.797 %) GDF9 (0.443 %) INHBA (0.443 %) MAML2 (0.443 %) MAML3 (0.443 %) SMAD2 (0.443 %) ACVR2A (0.354 %) AMHR2 (0.354 %) BMP3 (0.354 %) INHBB (0.354 %) BMP10 (0.266 %) BMP15 (0.266 %) BMPR1B (0.266 %) GDF2 (0.266 %) INHBE (0.266 %) MSTN (0.266 %) BMP2 (0.177 %) BMP4 (0.177 %) BMP6 (0.177 %) GDF5 (0.177 %) GDF6 (0.177 %) MAML1 (0.177 %) SMAD3 (0.177 %) SMAD9 (0.177 %) TGFB1 (0.177 %) TGFBR…	0.0173052	0.0286753	0.00580201	0.00290522	0.00869037	0.00580201	0.00290522	0.0115703	0.034311	0.00290522	0.014442	0.00580201	0.00290522	0.00869037	0.00290522	0.0115703	0.00580201	0.00290522	0.00580201	0.00290522	0.00290522	0.00869037	0.0115703	0.0115703	0.0173052	0.0454843	0.0620024	0.127807	0.0565284	0.0510224	0.0454843	0.0258452	0.334571	0.0427032	0.132867	0.230374	0.152817	0.0314973	0.0537794
Posttranslational Regulation Of Adherens Junction Stability And Dissassembly	259	50	360746	120.368	110	-0.039119	0.864067	100	92.7273	DSP (1.329 %) CREBBP (0.797 %) ROBO1 (0.797 %) MET (0.620 %) NTRK2 (0.620 %) ABL1 (0.531 %) CDH2 (0.443 %) IQGAP1 (0.443 %) TIAM1 (0.443 %) ZBTB33 (0.443 %) BDNF (0.354 %) CTNNA1 (0.354 %) HGS (0.354 %) IGF1R (0.354 %) SLIT1 (0.354 %) EGF (0.266 %) CTNNB1 (0.177 %) DNM2 (0.177 %) FER (0.177 %) GNA13 (0.177 %) MMP3 (0.177 %) RET (0.177 %) RIN2 (0.177 %) SNX1 (0.177 %) ADAM10 (0.089 %) CTNND1 (0.08…	0.0205981	0.0340939	0.00691373	0.00346286	0.0103526	0.00691373	0.00346286	0.0137797	0.040772	0.00346286	0.0171948	0.00691373	0.00346286	0.0103526	0.00346286	0.0137797	0.00691373	0.00346286	0.00691373	0.00346286	0.00346286	0.0103526	0.0137797	0.0137797	0.0205981	0.0539898	0.0734758	0.15044	0.0670255	0.0605303	0.0539898	0.0307375	0.384698	0.0507025	0.156314	0.268164	0.179405	0.0374387	0.0637835
PI3 Kinase Pathway	98	38	271752	63.8155	56	-0.0567383	0.865411	100	91.0714	JAK2 (0.620 %) INPPL1 (0.531 %) INSR (0.531 %) AKT2 (0.354 %) AKT3 (0.354 %) FOXO4 (0.354 %) NOS3 (0.354 %) RPS6KB1 (0.354 %) RPS6KB2 (0.354 %) GNB2 (0.266 %) GNB3 (0.266 %) IRS1 (0.266 %) PTGER1 (0.177 %) FOXO1 (0.089 %) FOXO3 (0.089 %) GNA14 (0.089 %) GNAQ (0.089 %) GNB1 (0.089 %) GSK3B (0.089 %) YWHAZ (0.089 %)	0.0104056	0.0172825	0.00348064	0.00174184	0.00521642	0.00348064	0.00174184	0.00694917	0.020703	0.00174184	0.0086789	0.00348064	0.00174184	0.00521642	0.00174184	0.00694917	0.00348064	0.00174184	0.00348064	0.00174184	0.00174184	0.00521642	0.00694917	0.00694917	0.0104056	0.0275083	0.0376276	0.0786707	0.0342663	0.0308932	0.0275083	0.0155678	0.216567	0.0258114	0.0818775	0.145212	0.0945935	0.0189942	0.0325812
Activated NOTCH1 Transmits Signal To The Nucleus	265	30	176194	73.354	65	-0.0525102	0.865551	100	90.7692	UBC (0.797 %) CNTN1 (0.620 %) MIB1 (0.531 %) ITCH (0.443 %) DNER (0.354 %) DTX1 (0.354 %) APH1B (0.266 %) DLK1 (0.266 %) DLL1 (0.266 %) DTX2 (0.266 %) JAG1 (0.266 %) PSEN2 (0.266 %) ARRB1 (0.177 %) DLL4 (0.177 %) DTX4 (0.177 %) NCSTN (0.177 %) NEURL1 (0.177 %) NUMB (0.177 %) ADAM10 (0.089 %) ADAM17 (0.089 %) APH1A (0.089 %) ARRB2 (0.089 %) JAG2 (0.089 %) MIB2 (0.089 %) PSENEN (0.089 %) UBA52 (0.0…	0.0120583	0.0200163	0.00403571	0.0020199	0.00604745	0.00403571	0.0020199	0.00805513	0.0239713	0.0020199	0.0100588	0.00403571	0.0020199	0.00604745	0.0020199	0.00805513	0.00403571	0.0020199	0.00403571	0.0020199	0.0020199	0.00604745	0.00805513	0.00805513	0.0120583	0.0318333	0.0435078	0.0906553	0.039632	0.0357406	0.0318333	0.0180329	0.246534	0.0298738	0.0943252	0.166377	0.108857	0.0219958	0.0376883
SMAD2/SMAD3:SMAD4 Heterotrimer Regulates Transcription	173	32	206492	79.7122	71	-0.0502664	0.866312	100	95.7746	UBC (0.797 %) HDAC1 (0.531 %) RBL1 (0.531 %) SMAD2 (0.443 %) ATP1B4 (0.354 %) E2F4 (0.354 %) MEN1 (0.354 %) TFDP2 (0.354 %) CCNT1 (0.266 %) RNF111 (0.266 %) SERPINE1 (0.266 %) SP1 (0.266 %) CCNC (0.177 %) CCNT2 (0.177 %) CDK8 (0.177 %) E2F5 (0.177 %) MYC (0.177 %) SMAD3 (0.177 %) TGIF2 (0.177 %) CCNK (0.089 %) JUNB (0.089 %) SMAD7 (0.089 %) SNW1 (0.089 %) UBA52 (0.089 %) WWTR1 (0.089 %)	0.0131747	0.0218612	0.00441098	0.00220793	0.00660917	0.00441098	0.00220793	0.00880251	0.0261758	0.00220793	0.010991	0.00441098	0.00220793	0.00660917	0.00220793	0.00880251	0.00441098	0.00220793	0.00441098	0.00220793	0.00220793	0.00660917	0.00880251	0.00880251	0.0131747	0.0347479	0.0474647	0.0986732	0.0432445	0.0390056	0.0347479	0.0196968	0.266151	0.0326119	0.102649	0.180395	0.118377	0.0240209	0.0411274
Prolactin	106	105	697471	197.308	184	-0.0303266	0.876504	100	83.6957	ERBB4 (1.063 %) CREBBP (0.797 %) PRKCB (0.797 %) JAK2 (0.620 %) MAPK4 (0.620 %) PIK3CG (0.620 %) FLNA (0.531 %) JUN (0.531 %) STAT3 (0.531 %) STAT5B (0.531 %) CBL (0.443 %) JAK1 (0.443 %) LYN (0.443 %) TYK2 (0.443 %) GAB2 (0.354 %) ITGB1 (0.354 %) NEK3 (0.354 %) NFKB1 (0.354 %) PTK2 (0.354 %) RPS6KA2 (0.354 %) RPS6KB1 (0.354 %) SH2B1 (0.354 %) CENPJ (0.266 %) CISH (0.266 %) ESR1 (0.266 %) IRS1 (0…	0.0360983	0.0594369	0.0121805	0.00610892	0.018215	0.0121805	0.00610892	0.0242127	0.0708935	0.00610892	0.0301737	0.0121805	0.00610892	0.018215	0.00610892	0.0242127	0.0121805	0.00610892	0.0121805	0.00610892	0.00610892	0.018215	0.0242127	0.0242127	0.0360983	0.0933896	0.126117	0.250238	0.115341	0.104433	0.0933896	0.0536558	0.575936	0.0878172	0.259371	0.423909	0.294802	0.0651827	0.109904
Validated Transcriptional Targets Of DeltaNp63 Isoforms	330	47	304273	81.2372	72	-0.0524226	0.877878	100	90.2778	COL5A1 (0.797 %) AXL (0.620 %) FASN (0.620 %) ITCH (0.443 %) DLX5 (0.266 %) DLX6 (0.266 %) MRE11A (0.266 %) NRG1 (0.266 %) POU2F2 (0.266 %) T (0.266 %) TP63 (0.266 %) YAP1 (0.266 %) ADA (0.177 %) FOSL2 (0.177 %) IL1A (0.177 %) KRT14 (0.177 %) MDM2 (0.177 %) PERP (0.177 %) TCF7L1 (0.177 %) TOP2A (0.177 %) WWP1 (0.177 %) BDKRB2 (0.089 %) GPX2 (0.089 %) GSK3B (0.089 %) HES1 (0.089 %) ITGA3 (0.089 %)…	0.0134442	0.0223064	0.00450163	0.00225335	0.00674484	0.00450163	0.00225335	0.00898299	0.0267076	0.00225335	0.0112161	0.00450163	0.00225335	0.00674484	0.00225335	0.00898299	0.00450163	0.00225335	0.00450163	0.00225335	0.00225335	0.00674484	0.00898299	0.00898299	0.0134442	0.0354507	0.0484183	0.1006	0.0441152	0.0397927	0.0354507	0.0200983	0.270813	0.0332723	0.104648	0.183747	0.120662	0.0245095	0.0419564
BMP Signaling Pathway ( TGF Beta BMP Diagram(MolecularVariation) )	220	34	245283	72.845	64	-0.0562198	0.879575	100	90.625	CREBBP (0.797 %) GDF9 (0.443 %) MAML2 (0.443 %) MAML3 (0.443 %) SMAD2 (0.443 %) BMP3 (0.354 %) BMP10 (0.266 %) BMP15 (0.266 %) BMPR1B (0.266 %) GDF2 (0.266 %) MSTN (0.266 %) BMP2 (0.177 %) BMP4 (0.177 %) BMP6 (0.177 %) GDF5 (0.177 %) GDF6 (0.177 %) MAML1 (0.177 %) SMAD3 (0.177 %) SMAD9 (0.177 %) WT1 (0.177 %) BMP5 (0.089 %) GDF3 (0.089 %) SMAD1 (0.089 %) SMAD5 (0.089 %)	0.0119695	0.0198694	0.00400586	0.00200494	0.00600276	0.00400586	0.00200494	0.00799566	0.0237957	0.00200494	0.00998457	0.00400586	0.00200494	0.00600276	0.00200494	0.00799566	0.00400586	0.00200494	0.00400586	0.00200494	0.00200494	0.00600276	0.00799566	0.00799566	0.0119695	0.0316011	0.0431924	0.0900145	0.0393441	0.0354804	0.0316011	0.0179004	0.244951	0.0296556	0.0936598	0.165252	0.108095	0.0218345	0.0374142
AKT(PKB) Bad Signaling ( EPO Signaling Pathway(JAK2 STAT1 STAT3 STAT5) )// AKT(PKB) Bad Signaling ( IL 7 Signaling(JAK1 JAK3 STAT5) )// Positive Regulation Of (Transcription Of SOCS By STAT Dimer) In JAK STAT Pathway ( JAK STAT Pathway And Regulation Pathway Diagram )// VEGF Signaling Pathway ( VEGF Signaling Pathway )	6	190	1270222	333.127	317	-0.0215512	0.883405	100	75.7098	PRKCQ (1.063 %) PDGFRA (0.797 %) PRKCB (0.797 %) MAP3K13 (0.709 %) FGFR2 (0.620 %) JAK2 (0.620 %) MET (0.620 %) PLCG1 (0.620 %) PRKG2 (0.620 %) STAT4 (0.620 %) ALK (0.531 %) BTK (0.531 %) INSR (0.531 %) ITK (0.531 %) KIT (0.531 %) STAT3 (0.531 %) STAT5B (0.531 %) IRAK2 (0.443 %) JAK1 (0.443 %) JAK3 (0.443 %) MAP3K10 (0.443 %) NTRK1 (0.443 %) PRKG1 (0.443 %) RIPK1 (0.443 %) TYK2 (0.443 %) WEE1 (0.…	0.068946	0.112248	0.0235314	0.0118357	0.0350886	0.0235314	0.0118357	0.0465091	0.133139	0.0118357	0.0577943	0.0235314	0.0118357	0.0350886	0.0118357	0.0465091	0.0235314	0.0118357	0.0235314	0.0118357	0.0118357	0.0350886	0.0465091	0.0465091	0.068946	0.173455	0.230442	0.428561	0.211897	0.192905	0.173455	0.101615	0.811166	0.163555	0.442008	0.65753	0.492704	0.122756	0.202458
PTK6 Regulates RHO GTPases// RAS GTPase And MAP Kinases	109	26	203379	66.7325	58	-0.0609093	0.886136	100	96.5517	RASAL2 (0.797 %) DAB2IP (0.620 %) SYNGAP1 (0.443 %) ELMO2 (0.354 %) RASA2 (0.354 %) BCAR1 (0.266 %) ELMO1 (0.266 %) RASA1 (0.266 %) RASA3 (0.266 %) RASAL1 (0.266 %) RASAL3 (0.266 %) SPRED1 (0.266 %) SPRED2 (0.266 %) DOCK1 (0.177 %) CRK (0.089 %) HRAS (0.089 %) RASA4 (0.089 %) RHOA (0.089 %) SPRED3 (0.089 %)	0.0109083	0.0181142	0.00364939	0.00182636	0.00546909	0.00364939	0.00182636	0.00728546	0.0216975	0.00182636	0.00909852	0.00364939	0.00182636	0.00546909	0.00182636	0.00728546	0.00364939	0.00182636	0.00364939	0.00182636	0.00182636	0.00546909	0.00728546	0.00728546	0.0109083	0.0288249	0.0394187	0.0823301	0.0359004	0.0323691	0.0288249	0.0163177	0.2258	0.027048	0.085679	0.151702	0.098953	0.0199075	0.0341364
EGFR1	30	475	3242934	629.723	612	-0.0123984	0.892328	100	53.7582	HUWE1 (1.949 %) PLCE1 (1.417 %) DSP (1.329 %) ERBB3 (1.329 %) TLN1 (1.329 %) FLNB (1.240 %) PLEC (1.063 %) ITSN2 (0.974 %) ARHGAP5 (0.886 %) CBLB (0.886 %) DOCK4 (0.886 %) NCOA3 (0.886 %) PRKCB (0.797 %) ABL2 (0.709 %) MYO6 (0.709 %) PARD3 (0.709 %) PLEKHA6 (0.709 %) PTPRF (0.709 %) RICTOR (0.709 %) ACTN4 (0.620 %) AXL (0.620 %) EPHB2 (0.620 %) JAK2 (0.620 %) KIRREL (0.620 %) MET (0.620 %) NEDD9 …	0.178329	0.279175	0.0633746	0.0322059	0.0935395	0.0633746	0.0322059	0.122733	0.324857	0.0322059	0.150986	0.0633746	0.0322059	0.0935395	0.0322059	0.122733	0.0633746	0.0322059	0.0633746	0.0322059	0.0322059	0.0935395	0.122733	0.122733	0.178329	0.40772	0.513341	0.785316	0.480412	0.445255	0.40772	0.255188	0.989776	0.38801	0.798922	0.947463	0.845251	0.30239	0.463121
EPHB Mediated Forward Signaling	249	42	323822	103.069	92	-0.0493409	0.894619	100	93.4783	GRIN2B (0.974 %) EPHB2 (0.620 %) ROCK1 (0.620 %) EPHB1 (0.531 %) LIMK1 (0.443 %) LYN (0.443 %) ROCK2 (0.443 %) TIAM1 (0.443 %) ACTG1 (0.354 %) EPHB3 (0.354 %) EPHB6 (0.354 %) PTK2 (0.354 %) ARHGEF28 (0.266 %) RASA1 (0.266 %) SDC2 (0.266 %) YES1 (0.266 %) ACTR2 (0.177 %) ARPC2 (0.177 %) EFNB2 (0.177 %) EPHB4 (0.177 %) GRIN1 (0.177 %) ARPC1A (0.089 %) ARPC1B (0.089 %) CFL1 (0.089 %) EFNB1 (0.089 %)…	0.0173781	0.0287955	0.0058266	0.00291756	0.00872715	0.0058266	0.00291756	0.0116192	0.0344543	0.00291756	0.0145029	0.0058266	0.00291756	0.00872715	0.00291756	0.0116192	0.0058266	0.00291756	0.0058266	0.00291756	0.00291756	0.00872715	0.0116192	0.0116192	0.0173781	0.0456732	0.0622576	0.128314	0.0567618	0.0512337	0.0456732	0.0259536	0.335722	0.0428808	0.133393	0.23123	0.153414	0.031629	0.0540018
AUF1 (hnRNP D0) Binds And Destabilizes MRNA// Autodegradation Of The E3 Ubiquitin Ligase COP1// CDK Mediated Phosphorylation And Removal Of Cdc6// CDT1 Association With The CDC6:ORC:origin Complex// Cross Presentation Of Soluble Exogenous Antigens (endosomes)// Dectin 1 Mediated Noncanonical NF KB Signaling// Degradation Of AXIN// Degradation Of DVL// Degradation Of GLI1 By The Proteasome// Degra…	145	162	849029	226.499	211	-0.0307831	0.90007	100	83.4123	HECW1 (1.506 %) GLI3 (0.886 %) UBC (0.797 %) GTSE1 (0.709 %) GLI1 (0.531 %) CCNA2 (0.443 %) CD4 (0.443 %) GLI2 (0.443 %) ITCH (0.443 %) KLHL12 (0.443 %) PSMD1 (0.443 %) HHAT (0.354 %) MCM7 (0.354 %) MRC2 (0.354 %) ORC2 (0.354 %) PABPC1 (0.354 %) PAK2 (0.354 %) PSMA3 (0.354 %) PSMD2 (0.354 %) PSMD4 (0.354 %) AXIN1 (0.266 %) AZIN1 (0.266 %) CUL5 (0.266 %) DVL3 (0.266 %) HNRNPD (0.266 %) MCM4 (0.266…	0.0425233	0.0698629	0.0143802	0.00721616	0.0214926	0.0143802	0.00721616	0.0285537	0.0832385	0.00721616	0.0355638	0.0143802	0.00721616	0.0214926	0.00721616	0.0285537	0.0143802	0.00721616	0.0143802	0.00721616	0.00721616	0.0214926	0.0285537	0.0285537	0.0425233	0.109415	0.147286	0.288507	0.134845	0.122222	0.109415	0.063102	0.637208	0.102942	0.298738	0.478898	0.338214	0.0765749	0.128556
HIF 2 Alpha Transcription Factor Network	272	34	214648	72.686	63	-0.0621104	0.900367	100	98.4127	CREBBP (0.797 %) ABCG2 (0.354 %) EPAS1 (0.354 %) KDR (0.354 %) ARNT (0.266 %) ETS1 (0.266 %) FLT1 (0.266 %) MMP14 (0.266 %) PGK1 (0.266 %) POU5F1 (0.266 %) SERPINE1 (0.266 %) SP1 (0.266 %) ADORA2A (0.177 %) CITED2 (0.177 %) EGLN2 (0.177 %) ELK1 (0.177 %) SIRT1 (0.177 %) SLC11A2 (0.177 %) APEX1 (0.089 %) BHLHE40 (0.089 %) EGLN1 (0.089 %) EIF3E (0.089 %) EPO (0.089 %) SLC2A1 (0.089 %) TCEB1 (0.089 …	0.0119418	0.0198236	0.00399654	0.00200027	0.00598881	0.00399654	0.00200027	0.0079771	0.0237409	0.00200027	0.00996141	0.00399654	0.00200027	0.00598881	0.00200027	0.0079771	0.00399654	0.00200027	0.00399654	0.00200027	0.00200027	0.00598881	0.0079771	0.0079771	0.0119418	0.0315286	0.0430939	0.0898144	0.0392542	0.0353991	0.0315286	0.017859	0.244457	0.0295875	0.093452	0.164901	0.107858	0.0217842	0.0373286
BCR	10	161	1021557	307.135	290	-0.0249309	0.901666	100	75.5172	ITPR1 (1.329 %) PRKCQ (1.063 %) CBLB (0.886 %) ITPR2 (0.797 %) PRKCB (0.797 %) CARD11 (0.620 %) CR2 (0.620 %) MAPK4 (0.620 %) NEDD9 (0.620 %) PIK3CG (0.620 %) PLCG1 (0.620 %) BANK1 (0.531 %) BTK (0.531 %) CD19 (0.531 %) ITK (0.531 %) JUN (0.531 %) PIP4K2C (0.531 %) STAT3 (0.531 %) ATP2B4 (0.443 %) CBL (0.443 %) CCNA2 (0.443 %) LYN (0.443 %) MAP4K1 (0.443 %) PTPRC (0.443 %) RAPGEF1 (0.443 %) GAB1 …	0.0620415	0.101249	0.0211235	0.0106181	0.0315174	0.0211235	0.0106181	0.0418009	0.120234	0.0106181	0.0519752	0.0211235	0.0106181	0.0315174	0.0106181	0.0418009	0.0211235	0.0106181	0.0211235	0.0106181	0.0106181	0.0315174	0.0418009	0.0418009	0.0620415	0.157009	0.209309	0.394512	0.192247	0.174816	0.157009	0.0916035	0.775637	0.147962	0.407303	0.617391	0.455817	0.110792	0.183578
Insulin Pathway	360	47	311648	106.042	94	-0.0523517	0.910386	100	92.5532	SORBS1 (0.620 %) INSR (0.531 %) CBL (0.443 %) EXOC7 (0.443 %) GRB14 (0.443 %) RAPGEF1 (0.443 %) AKT2 (0.354 %) EXOC2 (0.354 %) EXOC6 (0.354 %) GRB10 (0.354 %) INPP5D (0.354 %) PTPRA (0.354 %) RPS6KB1 (0.354 %) SGK1 (0.354 %) TRIP10 (0.354 %) EXOC1 (0.266 %) EXOC3 (0.266 %) IRS1 (0.266 %) RASA1 (0.266 %) EXOC4 (0.177 %) EXOC5 (0.177 %) F2RL2 (0.177 %) GRB2 (0.177 %) PRKCI (0.177 %) PTPN11 (0.177 %…	0.017925	0.0296962	0.00601107	0.00301006	0.00900303	0.00601107	0.00301006	0.011986	0.0355287	0.00301006	0.01496	0.00601107	0.00301006	0.00900303	0.00301006	0.011986	0.00601107	0.00301006	0.00601107	0.00301006	0.00301006	0.00900303	0.011986	0.011986	0.017925	0.0470889	0.0641698	0.132107	0.0585105	0.0528169	0.0470889	0.0267667	0.344295	0.0442119	0.137323	0.237623	0.15788	0.0326168	0.055668
Noncanonical Wnt Signaling Pathway	278	33	210070	75.6529	65	-0.0659121	0.91686	100	95.3846	CHD7 (0.797 %) ROCK1 (0.620 %) DAAM1 (0.531 %) FLNA (0.531 %) FZD6 (0.354 %) NFATC2 (0.354 %) DVL3 (0.266 %) ROR2 (0.266 %) TAB2 (0.266 %) YES1 (0.266 %) CAMK2A (0.177 %) DVL1 (0.177 %) FZD7 (0.177 %) MAPK10 (0.177 %) MAPK8 (0.177 %) PPARG (0.177 %) WNT5A (0.177 %) ARRB2 (0.089 %) FZD2 (0.089 %) FZD5 (0.089 %) MAP3K7 (0.089 %) NLK (0.089 %) RHOA (0.089 %) WNT3A (0.089 %)	0.0124606	0.0206813	0.00417091	0.00208763	0.00624983	0.00417091	0.00208763	0.00832442	0.0247659	0.00208763	0.0103947	0.00417091	0.00208763	0.00624983	0.00208763	0.00832442	0.00417091	0.00208763	0.00417091	0.00208763	0.00208763	0.00624983	0.00832442	0.00832442	0.0124606	0.0328842	0.044935	0.0935517	0.0409349	0.0369179	0.0328842	0.0186326	0.25366	0.030861	0.0973324	0.171454	0.112298	0.0227257	0.0389285
Regulation Of RAS By GAPs	117	67	397302	117.609	104	-0.053409	0.926457	100	93.2692	RASAL2 (0.797 %) UBC (0.797 %) DAB2IP (0.620 %) PSMD1 (0.443 %) SYNGAP1 (0.443 %) PSMA3 (0.354 %) PSMD2 (0.354 %) PSMD4 (0.354 %) RASA2 (0.354 %) PSMB8 (0.266 %) PSMC4 (0.266 %) RASA1 (0.266 %) RASA3 (0.266 %) RASAL1 (0.266 %) RASAL3 (0.266 %) SPRED1 (0.266 %) SPRED2 (0.266 %) CUL3 (0.177 %) PSMA6 (0.177 %) PSMB6 (0.177 %) PSMC6 (0.177 %) PSMD11 (0.177 %) PSMD12 (0.177 %) PSMD5 (0.177 %) PSMD6 (0…	0.0200784	0.0332395	0.0067381	0.00337475	0.0100901	0.0067381	0.00337475	0.0134308	0.0397537	0.00337475	0.0167602	0.0067381	0.00337475	0.0100901	0.00337475	0.0134308	0.0067381	0.00337475	0.0067381	0.00337475	0.00337475	0.0100901	0.0134308	0.0134308	0.0200784	0.0526506	0.0716718	0.146902	0.0653742	0.0590339	0.0526506	0.0299659	0.377034	0.0494427	0.152651	0.262317	0.175259	0.0365021	0.0622094
DNA Damage Recognition In GG NER	310	38	193949	74.0697	63	-0.0702998	0.926763	100	92.0635	UBC (0.797 %) CUL4B (0.709 %) INO80 (0.531 %) COPS3 (0.443 %) DDB1 (0.443 %) MCRS1 (0.354 %) PARP1 (0.266 %) XPC (0.266 %) CUL4A (0.177 %) INO80D (0.177 %) RAD23B (0.177 %) RUVBL1 (0.177 %) TFPT (0.177 %) ACTL6A (0.089 %) ACTR8 (0.089 %) CETN2 (0.089 %) COPS2 (0.089 %) COPS4 (0.089 %) COPS5 (0.089 %) COPS6 (0.089 %) COPS7B (0.089 %) COPS8 (0.089 %) DDB2 (0.089 %) GPS1 (0.089 %) INO80C (0.089 %) N…	0.0121834	0.0202231	0.00407774	0.00204095	0.00611037	0.00407774	0.00204095	0.00813885	0.0242184	0.00204095	0.0101632	0.00407774	0.00204095	0.00611037	0.00204095	0.00813885	0.00407774	0.00204095	0.00407774	0.00204095	0.00204095	0.00611037	0.00813885	0.00813885	0.0121834	0.0321601	0.0439517	0.0915567	0.0400372	0.0361067	0.0321601	0.0182193	0.248756	0.0301808	0.0952611	0.167959	0.109928	0.0222228	0.038074
Stabilization And Expansion Of The E Cadherin Adherens Junction	263	43	335329	127.382	113	-0.0520296	0.930664	100	93.8053	MYO6 (0.709 %) CYFIP2 (0.620 %) MET (0.620 %) NCKAP1 (0.620 %) ROCK1 (0.620 %) LPP (0.531 %) DIAPH1 (0.443 %) HGF (0.443 %) LIMA1 (0.443 %) CTNNA1 (0.354 %) ENAH (0.354 %) EPHA2 (0.354 %) IGF1R (0.354 %) PIP5K1C (0.354 %) VCL (0.354 %) CAMSAP3 (0.266 %) EGF (0.266 %) EXOC1 (0.266 %) EXOC3 (0.266 %) IGF1 (0.266 %) PVRL2 (0.266 %) STX4 (0.266 %) ABI1 (0.177 %) ACTN1 (0.177 %) CTNNB1 (0.177 %) EXOC4…	0.0219302	0.0362825	0.00736417	0.00368889	0.0110259	0.00736417	0.00368889	0.0146741	0.0433795	0.00368889	0.0183089	0.00736417	0.00368889	0.0110259	0.00368889	0.0146741	0.00736417	0.00368889	0.00736417	0.00368889	0.00368889	0.0110259	0.0146741	0.0146741	0.0219302	0.0574171	0.0780881	0.15945	0.0712486	0.0643584	0.0574171	0.0327143	0.403931	0.0539271	0.16564	0.282953	0.189947	0.0398376	0.0678099
Regulation Of Telomerase	217	70	469454	152.733	137	-0.0472111	0.933596	100	89.0511	SMG5 (0.886 %) SIN3B (0.620 %) SP3 (0.620 %) ABL1 (0.531 %) HDAC1 (0.531 %) JUN (0.531 %) BLM (0.443 %) NCL (0.443 %) RAD50 (0.443 %) SIN3A (0.443 %) DKC1 (0.354 %) E2F1 (0.354 %) NFKB1 (0.354 %) RPS6KB1 (0.354 %) TERF2 (0.354 %) EGF (0.266 %) ESR1 (0.266 %) HDAC2 (0.266 %) MRE11A (0.266 %) PINX1 (0.266 %) POT1 (0.266 %) SMG6 (0.266 %) SP1 (0.266 %) UBE3A (0.266 %) ZNFX1 (0.266 %) ACD (0.177 %) D…	0.0268766	0.0443918	0.00904033	0.00453043	0.0135298	0.00904033	0.00453043	0.0179989	0.0530308	0.00453043	0.0224478	0.00904033	0.00453043	0.0135298	0.00453043	0.0179989	0.00904033	0.00453043	0.00904033	0.00453043	0.00453043	0.0135298	0.0179989	0.0179989	0.0268766	0.0700752	0.0950684	0.192178	0.0868129	0.078482	0.0700752	0.0400427	0.470436	0.0658431	0.199481	0.335463	0.228039	0.0487211	0.0826569
IFN Gamma Pathway	195	43	300138	92.9715	80	-0.0652598	0.937248	100	95	CREBBP (0.797 %) DAPK1 (0.620 %) JAK2 (0.620 %) STAT3 (0.531 %) CBL (0.443 %) JAK1 (0.443 %) RAPGEF1 (0.443 %) CAMK2D (0.354 %) IRF9 (0.266 %) PIAS4 (0.266 %) PRKCD (0.266 %) CAMK2A (0.177 %) CASP1 (0.177 %) IFNG (0.177 %) MAPK1 (0.177 %) MAPK3 (0.177 %) PIAS1 (0.177 %) PTPN11 (0.177 %) PTPN2 (0.177 %) RAP1B (0.177 %) CALM2 (0.089 %) CALM3 (0.089 %) CAMK2G (0.089 %) CRKL (0.089 %) IL1B (0.089 %) …	0.0155409	0.0257671	0.00520737	0.00260708	0.00780087	0.00520737	0.00260708	0.0103876	0.0308403	0.00260708	0.0129676	0.00520737	0.00260708	0.00780087	0.00260708	0.0103876	0.00520737	0.00260708	0.00520737	0.00260708	0.00260708	0.00780087	0.0103876	0.0103876	0.0155409	0.0409075	0.0558127	0.115465	0.0508702	0.0459019	0.0409075	0.0232205	0.306128	0.0384005	0.120071	0.209385	0.138257	0.028307	0.0483893
VEGFA VEGFR2 Pathway	297	60	402060	136.485	121	-0.0522983	0.939234	100	88.4298	AXL (0.620 %) CYFIP2 (0.620 %) NCKAP1 (0.620 %) NCKAP1L (0.620 %) ROCK1 (0.620 %) ITGAV (0.531 %) ITGB3 (0.531 %) NCF2 (0.531 %) VAV3 (0.531 %) ROCK2 (0.443 %) ELMO2 (0.354 %) KDR (0.354 %) PAK2 (0.354 %) PTK2 (0.354 %) PTK2B (0.354 %) BCAR1 (0.266 %) ELMO1 (0.266 %) SH2D2A (0.266 %) VAV1 (0.266 %) WASF3 (0.266 %) ABI1 (0.177 %) ABI2 (0.177 %) CYBB (0.177 %) CYFIP1 (0.177 %) DOCK1 (0.177 %) MAPK1…	0.0236823	0.0391582	0.00795726	0.00398658	0.0119121	0.00795726	0.00398658	0.0158512	0.0468038	0.00398658	0.0197746	0.00795726	0.00398658	0.0119121	0.00398658	0.0158512	0.00795726	0.00398658	0.00795726	0.00398658	0.00398658	0.0119121	0.0158512	0.0158512	0.0236823	0.0619131	0.0841292	0.171173	0.076783	0.0693777	0.0619131	0.0353124	0.428355	0.0581584	0.177768	0.301981	0.203628	0.0429886	0.0730877
Rho GTPase Cycle	261	122	1020247	300.174	279	-0.0317685	0.945192	100	75.9857	OBSCN (1.860 %) MYO9A (1.151 %) DLC1 (1.063 %) ARHGAP5 (0.886 %) AKAP13 (0.797 %) ARHGAP31 (0.797 %) STARD8 (0.797 %) FAM13B (0.709 %) MYO9B (0.709 %) ARHGEF11 (0.620 %) OCRL (0.620 %) PLEKHG2 (0.620 %) A2M (0.531 %) ARAP2 (0.531 %) ARAP3 (0.531 %) ARHGAP9 (0.531 %) ARHGEF4 (0.531 %) ARHGEF9 (0.531 %) VAV3 (0.531 %) ARHGAP11A (0.443 %) ARHGAP12 (0.443 %) ARHGAP24 (0.443 %) ARHGAP29 (0.443 %) CHN2…	0.060246	0.0983799	0.0204994	0.0103028	0.0305909	0.0204994	0.0103028	0.0405785	0.116863	0.0103028	0.0504632	0.0204994	0.0103028	0.0305909	0.0103028	0.0405785	0.0204994	0.0103028	0.0204994	0.0103028	0.0103028	0.0305909	0.0405785	0.0405785	0.060246	0.152699	0.203745	0.385374	0.187081	0.170068	0.152699	0.088994	0.765399	0.143879	0.397973	0.606257	0.445841	0.107669	0.178619
MAPK6/MAPK4 Signaling	82	90	573633	171.788	154	-0.0474715	0.947563	100	90.2597	NCOA3 (0.886 %) UBC (0.797 %) AGO4 (0.709 %) MAPK4 (0.620 %) TNRC6B (0.620 %) XPO1 (0.620 %) AGO1 (0.531 %) AGO2 (0.531 %) JUN (0.531 %) RAG1 (0.531 %) PSMD1 (0.443 %) TNRC6C (0.443 %) MAPK6 (0.354 %) PAK2 (0.354 %) PSMA3 (0.354 %) PSMD2 (0.354 %) PSMD4 (0.354 %) TNRC6A (0.354 %) MMP2 (0.266 %) MOV10 (0.266 %) PAK3 (0.266 %) PSMB8 (0.266 %) PSMC4 (0.266 %) RAG2 (0.266 %) CCND3 (0.177 %) CDC14A (0…	0.0307346	0.0506977	0.0103517	0.00518929	0.0154872	0.0103517	0.00518929	0.0205962	0.0605246	0.00518929	0.0256786	0.0103517	0.00518929	0.0154872	0.00518929	0.0205962	0.0103517	0.00518929	0.0103517	0.00518929	0.00518929	0.0154872	0.0205962	0.0205962	0.0307346	0.0798742	0.108154	0.216929	0.0988252	0.089399	0.0798742	0.0457458	0.517316	0.0750745	0.225035	0.373904	0.256629	0.055624	0.0941244
Downregulation Of SMAD2/3:SMAD4 Transcriptional Activity	153	23	217149	78.1737	65	-0.0801471	0.95394	100	96.9231	USP9X (1.151 %) UBC (0.797 %) NCOR2 (0.620 %) HDAC1 (0.531 %) NEDD4L (0.531 %) SMAD2 (0.443 %) PARP1 (0.266 %) RNF111 (0.266 %) SKIL (0.266 %) TRIM33 (0.266 %) SMAD3 (0.177 %) SMURF2 (0.177 %) TGIF2 (0.177 %) PPM1A (0.089 %) UBA52 (0.089 %) UBE2D3 (0.089 %)	0.0129035	0.0214131	0.00431979	0.00216223	0.00647268	0.00431979	0.00216223	0.00862091	0.0256404	0.00216223	0.0107645	0.00431979	0.00216223	0.00647268	0.00216223	0.00862091	0.00431979	0.00216223	0.00431979	0.00216223	0.00216223	0.00647268	0.00862091	0.00862091	0.0129035	0.0340403	0.0465045	0.096731	0.0423677	0.038213	0.0340403	0.0192926	0.261431	0.0319471	0.100633	0.17701	0.116073	0.0235291	0.0402926
Coregulation Of Androgen Receptor Activity	309	61	443657	151.069	133	-0.0553241	0.958386	100	89.4737	PRKDC (0.974 %) NCOA6 (0.709 %) AR (0.620 %) KDM3A (0.620 %) SVIL (0.620 %) TCF4 (0.531 %) VAV3 (0.531 %) ZNF318 (0.531 %) KDM4C (0.443 %) HIP1 (0.354 %) LATS2 (0.354 %) NCOA4 (0.354 %) NRIP1 (0.354 %) PTK2B (0.354 %) RPS6KA3 (0.354 %) ZMIZ1 (0.354 %) CTDSP1 (0.266 %) GSN (0.266 %) MAK (0.266 %) MED1 (0.266 %) PELP1 (0.266 %) PIAS4 (0.266 %) UBE3A (0.266 %) APPL1 (0.177 %) CCND3 (0.177 %) CTNNB1 …	0.0265456	0.04385	0.00892799	0.004474	0.0133621	0.00892799	0.004474	0.0177763	0.0523865	0.004474	0.0221707	0.00892799	0.004474	0.0133621	0.004474	0.0177763	0.00892799	0.004474	0.00892799	0.004474	0.004474	0.0133621	0.0177763	0.0177763	0.0265456	0.0692315	0.0939393	0.190023	0.0857771	0.0775414	0.0692315	0.0395529	0.466217	0.0650485	0.197255	0.332065	0.225541	0.0481278	0.0816685
ErbB4 Signaling Events	38	35	275214	92.8204	77	-0.0811528	0.969242	100	96.1039	ERBB4 (1.063 %) GRIN2B (0.974 %) JAK2 (0.620 %) STAT5B (0.531 %) ITCH (0.443 %) LRIG1 (0.266 %) NEDD4 (0.266 %) NRG1 (0.266 %) STAT5A (0.266 %) TAB2 (0.266 %) YAP1 (0.266 %) GRB2 (0.177 %) MAPK1 (0.177 %) MAPK3 (0.177 %) MDM2 (0.177 %) NRG3 (0.177 %) PRLR (0.177 %) WWP1 (0.177 %) ADAM17 (0.089 %) BTC (0.089 %) CBFA2T3 (0.089 %) DLG4 (0.089 %) FYN (0.089 %) HBEGF (0.089 %) SHC1 (0.089 %)	0.0155136	0.0257221	0.00519819	0.00260248	0.00778714	0.00519819	0.00260248	0.0103694	0.0307866	0.00260248	0.0129448	0.00519819	0.00260248	0.00778714	0.00260248	0.0103694	0.00519819	0.00260248	0.00519819	0.00260248	0.00260248	0.00778714	0.0103694	0.0103694	0.0155136	0.0408367	0.0557168	0.115273	0.0507826	0.0458226	0.0408367	0.02318	0.30568	0.038334	0.119872	0.209056	0.13803	0.0282577	0.0483059
Validated Targets Of C MYC Transcriptional Repression	139	63	416109	116.942	99	-0.0723342	0.97221	100	91.9192	COL1A2 (0.709 %) DNTT (0.531 %) HDAC1 (0.531 %) PPP2R4 (0.531 %) RBL1 (0.531 %) DNMT3A (0.443 %) ITGA6 (0.443 %) ITGB4 (0.443 %) SMAD2 (0.443 %) ITGB1 (0.354 %) TSC2 (0.354 %) HMGCS2 (0.266 %) PDGFRB (0.266 %) SLC11A1 (0.266 %) SP1 (0.266 %) CREB1 (0.177 %) HDAC3 (0.177 %) MYC (0.177 %) NDRG2 (0.177 %) NFYC (0.177 %) SFRP1 (0.177 %) SMAD3 (0.177 %) TJP2 (0.177 %) WNT5A (0.177 %) ALDH9A1 (0.089 %)…	0.019953	0.0330333	0.00669572	0.00335348	0.0100267	0.00669572	0.00335348	0.0133466	0.0395078	0.00335348	0.0166553	0.00669572	0.00335348	0.0100267	0.00335348	0.0133466	0.00669572	0.00335348	0.00669572	0.00335348	0.00335348	0.0100267	0.0133466	0.0133466	0.019953	0.0523271	0.071236	0.146047	0.0649753	0.0586725	0.0523271	0.0297796	0.375171	0.0491384	0.151764	0.260899	0.174255	0.036276	0.0618292
ATM Pathway	305	34	268496	91.1787	75	-0.0848319	0.973074	100	89.3333	MDC1 (0.886 %) ABL1 (0.531 %) FANCD2 (0.531 %) SMC1A (0.531 %) TP53BP1 (0.531 %) BLM (0.443 %) DCLRE1C (0.443 %) RAD50 (0.443 %) SMC3 (0.354 %) TERF2 (0.354 %) MRE11A (0.266 %) RBBP8 (0.266 %) TOP3A (0.266 %) BID (0.177 %) CDC25C (0.177 %) MDM2 (0.177 %) RAD17 (0.177 %) TRIM28 (0.177 %) UIMC1 (0.177 %) XRCC4 (0.177 %) CDC25A (0.089 %) H2AFX (0.089 %) NBN (0.089 %) RAD9A (0.089 %) YWHAB (0.089 %)	0.0152179	0.0252343	0.00509858	0.00255255	0.00763812	0.00509858	0.00255255	0.0101712	0.0302042	0.00255255	0.0126978	0.00509858	0.00255255	0.00763812	0.00255255	0.0101712	0.00509858	0.00255255	0.00509858	0.00255255	0.00255255	0.00763812	0.0101712	0.0101712	0.0152179	0.0400682	0.0546763	0.113189	0.0498318	0.0449624	0.0400682	0.0227398	0.300797	0.0376116	0.11771	0.205485	0.135567	0.0277224	0.0474002
Regulation Of Nuclear SMAD2/3 Signaling	235	82	546880	161.918	141	-0.0600772	0.974425	100	88.6525	LAMC1 (1.063 %) CREBBP (0.797 %) COL1A2 (0.709 %) AR (0.620 %) SIN3B (0.620 %) SP3 (0.620 %) HDAC1 (0.531 %) JUN (0.531 %) NCOA1 (0.531 %) RBL1 (0.531 %) SIN3A (0.443 %) SMAD2 (0.443 %) E2F4 (0.354 %) FOXO4 (0.354 %) NR3C1 (0.354 %) ESR1 (0.266 %) HDAC2 (0.266 %) KAT2B (0.266 %) MEF2C (0.266 %) PIAS4 (0.266 %) SERPINE1 (0.266 %) SKIL (0.266 %) SP1 (0.266 %) ATF2 (0.177 %) CDK2 (0.177 %) CREB1 (0.…	0.0287211	0.0474087	0.00966684	0.00484516	0.0144652	0.00966684	0.00484516	0.0192402	0.0566172	0.00484516	0.0239922	0.00966684	0.00484516	0.0144652	0.00484516	0.0192402	0.00966684	0.00484516	0.00966684	0.00484516	0.00484516	0.0144652	0.0192402	0.0192402	0.0287211	0.0747681	0.101342	0.204095	0.0925698	0.0837122	0.0747681	0.0427708	0.493368	0.0702634	0.211789	0.354109	0.241828	0.0520241	0.0881518
Ras Pathway	115	69	457806	140.247	120	-0.0677119	0.977284	100	94.1667	PIK3CG (0.620 %) JUN (0.531 %) MAP3K4 (0.531 %) PLD1 (0.531 %) STAT3 (0.531 %) TIAM1 (0.443 %) AKT3 (0.354 %) ARAF (0.354 %) EXOC2 (0.354 %) PAK2 (0.354 %) PIK3CD (0.354 %) PLD2 (0.354 %) RPS6KA2 (0.354 %) RPS6KA3 (0.354 %) RPS6KA6 (0.354 %) ETS1 (0.266 %) GSK3A (0.266 %) PAK3 (0.266 %) PIK3C3 (0.266 %) RGL2 (0.266 %) ATF2 (0.177 %) ELK1 (0.177 %) MAP2K3 (0.177 %) MAP2K7 (0.177 %) MAPK1 (0.177 %)…	0.0244143	0.0403585	0.00820524	0.00411107	0.0122826	0.00820524	0.00411107	0.0163432	0.0482326	0.00411107	0.020387	0.00820524	0.00411107	0.0122826	0.00411107	0.0163432	0.00820524	0.00411107	0.00820524	0.00411107	0.00411107	0.0122826	0.0163432	0.0163432	0.0244143	0.0637874	0.0866444	0.176028	0.0790881	0.0714693	0.0637874	0.036397	0.438271	0.0599227	0.182789	0.30979	0.209282	0.0443036	0.0752866
Signaling Events Mediated By Focal Adhesion Kinase	125	63	486599	166.744	144	-0.0636887	0.98197	100	88.1944	TLN1 (1.329 %) MYLK (0.886 %) ACTN2 (0.797 %) ACTN4 (0.620 %) ARHGEF11 (0.620 %) PLCG1 (0.620 %) ITGAV (0.531 %) JUN (0.531 %) RAPGEF1 (0.443 %) ROCK2 (0.443 %) ASAP1 (0.354 %) BMX (0.354 %) GRB7 (0.354 %) ITGB1 (0.354 %) MAPK8IP3 (0.354 %) PTK2 (0.354 %) VCL (0.354 %) ARHGEF28 (0.266 %) ARHGEF7 (0.266 %) BCAR1 (0.266 %) CAPN2 (0.266 %) ELMO1 (0.266 %) ETS1 (0.266 %) ITGA5 (0.266 %) RASA1 (0.266 …	0.0297015	0.0490108	0.0100002	0.00501265	0.0149627	0.0100002	0.00501265	0.0199003	0.0585208	0.00501265	0.0248132	0.0100002	0.00501265	0.0149627	0.00501265	0.0199003	0.0100002	0.00501265	0.0100002	0.00501265	0.00501265	0.0149627	0.0199003	0.0199003	0.0297015	0.0772566	0.104663	0.210367	0.0956195	0.0864842	0.0772566	0.0442198	0.505167	0.0726079	0.218263	0.363819	0.249067	0.0537777	0.0910633
Pre NOTCH Transcription And Translation	289	29	320666	109.263	90	-0.0842314	0.982932	100	95.5556	CREBBP (0.797 %) AGO4 (0.709 %) NOTCH4 (0.620 %) TNRC6B (0.620 %) AGO1 (0.531 %) AGO2 (0.531 %) JUN (0.531 %) MAML2 (0.443 %) MAML3 (0.443 %) TNRC6C (0.443 %) E2F1 (0.354 %) MAMLD1 (0.354 %) TFDP2 (0.354 %) TNRC6A (0.354 %) KAT2B (0.266 %) MOV10 (0.266 %) NOTCH3 (0.266 %) MAML1 (0.177 %) CCND1 (0.089 %) E2F3 (0.089 %) SNW1 (0.089 %)	0.0185205	0.0306765	0.006212	0.00311084	0.00930351	0.006212	0.00311084	0.0123854	0.0366979	0.00311084	0.0154577	0.006212	0.00311084	0.00930351	0.00311084	0.0123854	0.006212	0.00311084	0.006212	0.00311084	0.00311084	0.00930351	0.0123854	0.0123854	0.0185205	0.0486288	0.0662487	0.13622	0.0604119	0.0545387	0.0486288	0.0276517	0.353509	0.04566	0.141586	0.244527	0.162718	0.0336919	0.0574799
APC/C:Cdc20 Mediated Degradation Of Securin// APC/C:Cdh1 Mediated Degradation Of Cdc20 And Other APC/C:Cdh1 Targeted Proteins In Late Mitosis/early G1// Autodegradation Of Cdh1 By Cdh1:APC/C// Cdc20:Phospho APC/C Mediated Degradation Of Cyclin A	144	77	374303	111.637	92	-0.0840187	0.983799	100	88.0435	UBC (0.797 %) ANAPC5 (0.531 %) CCNA2 (0.443 %) MAD2L1 (0.443 %) PSMD1 (0.443 %) ANAPC1 (0.354 %) ANAPC7 (0.354 %) PSMA3 (0.354 %) PSMD2 (0.354 %) PSMD4 (0.354 %) ANAPC4 (0.266 %) PSMB8 (0.266 %) PSMC4 (0.266 %) PTTG1 (0.266 %) BUB3 (0.177 %) PSMA6 (0.177 %) PSMB6 (0.177 %) PSMC6 (0.177 %) PSMD11 (0.177 %) PSMD12 (0.177 %) PSMD5 (0.177 %) PSMD6 (0.177 %) PSMD7 (0.177 %) ANAPC10 (0.089 %) ANAPC2 (0…	0.0189613	0.031402	0.00636081	0.00318548	0.00952602	0.00636081	0.00318548	0.0126812	0.0375631	0.00318548	0.0158262	0.00636081	0.00318548	0.00952602	0.00318548	0.0126812	0.00636081	0.00318548	0.00636081	0.00318548	0.00318548	0.00952602	0.0126812	0.0126812	0.0189613	0.0497679	0.0677855	0.139255	0.0618179	0.0558121	0.0497679	0.0283067	0.360251	0.0467313	0.14473	0.249601	0.166284	0.0344875	0.0588198
Direct P53 Effectors	152	141	809720	225.083	199	-0.0534888	0.984289	100	84.9246	PRDM1 (0.974 %) VCAN (0.886 %) CREBBP (0.797 %) TRRAP (0.797 %) NLRC4 (0.709 %) COL18A1 (0.620 %) MET (0.620 %) APAF1 (0.531 %) DROSHA (0.531 %) JUN (0.531 %) TYRP1 (0.531 %) HGF (0.443 %) MSH2 (0.443 %) TP53BP2 (0.443 %) CSE1L (0.354 %) E2F1 (0.354 %) EPHA2 (0.354 %) HTT (0.354 %) POU4F2 (0.354 %) TSC2 (0.354 %) CEBPZ (0.266 %) DGCR8 (0.266 %) HDAC2 (0.266 %) MAP4K4 (0.266 %) MMP2 (0.266 %) PLK3…	0.0422043	0.0693462	0.0142708	0.00716103	0.0213296	0.0142708	0.00716103	0.0283379	0.0826273	0.00716103	0.035296	0.0142708	0.00716103	0.0213296	0.00716103	0.0283379	0.0142708	0.00716103	0.0142708	0.00716103	0.00716103	0.0213296	0.0283379	0.0283379	0.0422043	0.108624	0.146244	0.286647	0.133883	0.121344	0.108624	0.0626337	0.634376	0.102195	0.296827	0.476287	0.336115	0.0760106	0.127636
NRAGE Signals Death Through JNK	257	45	442727	148.449	126	-0.0712078	0.984914	100	87.3016	OBSCN (1.860 %) AKAP13 (0.797 %) ARHGEF11 (0.620 %) PLEKHG2 (0.620 %) ARHGEF4 (0.531 %) ARHGEF9 (0.531 %) VAV3 (0.531 %) MAGED1 (0.443 %) MCF2L (0.443 %) TIAM1 (0.443 %) ARHGEF6 (0.354 %) ECT2 (0.354 %) FGD1 (0.354 %) MCF2 (0.354 %) RASGRF2 (0.354 %) TIAM2 (0.354 %) ABR (0.266 %) ARHGEF12 (0.266 %) ARHGEF2 (0.266 %) ARHGEF7 (0.266 %) BCL2L11 (0.266 %) FGD2 (0.266 %) FGD3 (0.266 %) FGD4 (0.266 %) …	0.0260261	0.0429994	0.00875174	0.00438549	0.0130988	0.00875174	0.00438549	0.0174269	0.0513749	0.00438549	0.0217359	0.00875174	0.00438549	0.0130988	0.00438549	0.0174269	0.00875174	0.00438549	0.00875174	0.00438549	0.00438549	0.0130988	0.0174269	0.0174269	0.0260261	0.0679064	0.0921652	0.186632	0.0841499	0.0760639	0.0679064	0.038784	0.459531	0.0638008	0.19375	0.326698	0.221606	0.0471964	0.0801158
PDGFR Beta Signaling Pathway	96	125	847363	238.06	211	-0.0524048	0.985749	100	80.0948	LRP1 (1.151 %) DOCK4 (0.886 %) ACTN4 (0.620 %) CYFIP2 (0.620 %) JAK2 (0.620 %) NCKAP1 (0.620 %) PIK3CG (0.620 %) PLCG1 (0.620 %) ABL1 (0.531 %) EPS8 (0.531 %) ITGAV (0.531 %) ITGB3 (0.531 %) JUN (0.531 %) PLA2G4A (0.531 %) STAT3 (0.531 %) STAT5B (0.531 %) ACTA2 (0.443 %) CBL (0.443 %) IQGAP1 (0.443 %) LYN (0.443 %) RAPGEF1 (0.443 %) GAB1 (0.354 %) GRB10 (0.354 %) RPS6KA3 (0.354 %) BCAR1 (0.266 %)…	0.0451576	0.0741241	0.015285	0.00767192	0.0228396	0.015285	0.00767192	0.0303363	0.0882761	0.00767192	0.0377755	0.015285	0.00767192	0.0228396	0.00767192	0.0303363	0.015285	0.00767192	0.015285	0.00767192	0.00767192	0.0228396	0.0303363	0.0303363	0.0451576	0.115934	0.155857	0.303697	0.142754	0.129447	0.115934	0.0669659	0.659796	0.1091	0.31434	0.499994	0.35531	0.0812273	0.136126
G Alpha (12/13) Signalling Events	251	75	583526	167.615	143	-0.0689773	0.988235	100	84.6154	OBSCN (1.860 %) AKAP13 (0.797 %) ARHGEF11 (0.620 %) PLEKHG2 (0.620 %) ROCK1 (0.620 %) ARHGEF1 (0.531 %) ARHGEF4 (0.531 %) ARHGEF9 (0.531 %) VAV3 (0.531 %) MCF2L (0.443 %) ROCK2 (0.443 %) TIAM1 (0.443 %) ARHGEF6 (0.354 %) ECT2 (0.354 %) FGD1 (0.354 %) MCF2 (0.354 %) RASGRF2 (0.354 %) TIAM2 (0.354 %) ABR (0.266 %) ARHGEF12 (0.266 %) ARHGEF2 (0.266 %) ARHGEF7 (0.266 %) FGD2 (0.266 %) FGD3 (0.266 %) …	0.0298793	0.0493011	0.0100606	0.00504303	0.0150529	0.0100606	0.00504303	0.02002	0.0588658	0.00504303	0.0249621	0.0100606	0.00504303	0.0150529	0.00504303	0.02002	0.0100606	0.00504303	0.0100606	0.00504303	0.00504303	0.0150529	0.02002	0.02002	0.0298793	0.0777073	0.105265	0.211499	0.0961716	0.0869861	0.0777073	0.0444824	0.507278	0.0730326	0.219432	0.365565	0.250373	0.0540955	0.0915905
Class I PI3K Signaling Events Mediated By Akt	17	35	235572	78.721	61	-0.110761	0.988241	100	95.082	PRKDC (0.974 %) RICTOR (0.709 %) TBC1D4 (0.709 %) AKT2 (0.354 %) AKT3 (0.354 %) FOXO4 (0.354 %) GSK3A (0.266 %) KPNA1 (0.266 %) CHUK (0.177 %) MAPKAP1 (0.177 %) PRKACA (0.177 %) BCL2L1 (0.089 %) FOXO1 (0.089 %) FOXO3 (0.089 %) GSK3B (0.089 %) HSP90AA1 (0.089 %) MAP3K5 (0.089 %) RAF1 (0.089 %) SFN (0.089 %) SLC2A4 (0.089 %) YWHAB (0.089 %) YWHAG (0.089 %) YWHAH (0.089 %) YWHAZ (0.089 %)	0.0129999	0.0215724	0.0043522	0.00217847	0.0065212	0.0043522	0.00217847	0.00868546	0.0258307	0.00217847	0.010845	0.0043522	0.00217847	0.0065212	0.00217847	0.00868546	0.0043522	0.00217847	0.0043522	0.00217847	0.00217847	0.0065212	0.00868546	0.00868546	0.0129999	0.0342918	0.0468459	0.0974218	0.0426795	0.0384948	0.0342918	0.0194363	0.263112	0.0321835	0.10135	0.178215	0.116893	0.0237039	0.0405894
TP53 Regulates Transcription Of DNA Repair Genes	186	61	429440	122.946	101	-0.0853921	0.989119	100	88.1188	MDC1 (0.886 %) SUPT5H (0.709 %) POLR2A (0.620 %) FANCD2 (0.531 %) JUN (0.531 %) SUPT16H (0.531 %) MSH2 (0.443 %) SSRP1 (0.443 %) FANCI (0.354 %) TCEB3 (0.354 %) CCNH (0.266 %) CCNT1 (0.266 %) FANCC (0.266 %) NELFCD (0.266 %) POLR2H (0.266 %) TCEA1 (0.266 %) ATF2 (0.177 %) CCNT2 (0.177 %) CDK13 (0.177 %) CDK7 (0.177 %) ELL (0.177 %) ERCC3 (0.177 %) MNAT1 (0.177 %) NELFA (0.177 %) NELFE (0.177 %) P…	0.0210859	0.0348955	0.00707861	0.00354559	0.0105991	0.00707861	0.00354559	0.0141071	0.0417271	0.00354559	0.0176027	0.00707861	0.00354559	0.0105991	0.00354559	0.0141071	0.00707861	0.00354559	0.00707861	0.00354559	0.00354559	0.0105991	0.0141071	0.0141071	0.0210859	0.0552456	0.0751665	0.153749	0.0685733	0.0619331	0.0552456	0.0314615	0.391808	0.0518839	0.159739	0.273611	0.183279	0.0383174	0.0652591
E Cadherin Signaling In The Nascent Adherens Junction	246	37	301335	96.9738	77	-0.100164	0.989816	100	96.1039	CYFIP2 (0.620 %) DLG1 (0.620 %) NCKAP1 (0.620 %) TJP1 (0.620 %) IQGAP1 (0.443 %) ITGAE (0.443 %) RAPGEF1 (0.443 %) TIAM1 (0.443 %) CTNNA1 (0.354 %) ENAH (0.354 %) PIP5K1C (0.354 %) CTTN (0.266 %) ABI1 (0.177 %) CTNNB1 (0.177 %) KLHL20 (0.177 %) RAP1B (0.177 %) VAV2 (0.177 %) CA2 (0.089 %) CCND1 (0.089 %) CRK (0.089 %) CTNND1 (0.089 %) ITGB7 (0.089 %) JUP (0.089 %) RHOA (0.089 %) WASF2 (0.089 %)	0.0162654	0.0269618	0.00545147	0.00272946	0.00816605	0.00545147	0.00272946	0.0108732	0.0322663	0.00272946	0.013573	0.00545147	0.00272946	0.00816605	0.00272946	0.0108732	0.00545147	0.00272946	0.00545147	0.00272946	0.00272946	0.00816605	0.0108732	0.0108732	0.0162654	0.0427887	0.0583581	0.120551	0.0531966	0.0480069	0.0427887	0.0242986	0.317946	0.0401688	0.125346	0.218068	0.144263	0.0296177	0.0506053
Signaling Events Mediated By Hepatocyte Growth Factor Receptor (c Met)	262	80	551119	155.536	131	-0.0745604	0.989992	100	83.9695	MET (0.620 %) PLCG1 (0.620 %) ARHGEF4 (0.531 %) INPPL1 (0.531 %) JUN (0.531 %) SH3KBP1 (0.531 %) CBL (0.443 %) HGF (0.443 %) KPNB1 (0.443 %) RAPGEF1 (0.443 %) RPTOR (0.443 %) AKT2 (0.354 %) CTNNA1 (0.354 %) EPS15 (0.354 %) GAB1 (0.354 %) GAB2 (0.354 %) HGS (0.354 %) INPP5D (0.354 %) PAK2 (0.354 %) PTK2 (0.354 %) SH3GL2 (0.354 %) BCAR1 (0.266 %) ETS1 (0.266 %) PTPRJ (0.266 %) CTNNB1 (0.177 %) F2RL…	0.0274365	0.0453081	0.00923045	0.00462593	0.0138137	0.00923045	0.00462593	0.0183757	0.0541203	0.00462593	0.0229166	0.00923045	0.00462593	0.0138137	0.00462593	0.0183757	0.00923045	0.00462593	0.00923045	0.00462593	0.00462593	0.0138137	0.0183757	0.0183757	0.0274365	0.0715015	0.0969763	0.195813	0.0885634	0.080072	0.0715015	0.0408712	0.477501	0.0671864	0.203236	0.341176	0.232249	0.0497244	0.0843275
Hedgehog Signaling Events Mediated By Gli Proteins	253	49	370263	130.111	107	-0.0849295	0.990844	100	94.3925	GLI3 (0.886 %) CREBBP (0.797 %) PTCH1 (0.620 %) SIN3B (0.620 %) XPO1 (0.620 %) GLI1 (0.531 %) HDAC1 (0.531 %) GLI2 (0.443 %) SIN3A (0.443 %) IFT88 (0.354 %) MTSS1 (0.354 %) GNAO1 (0.266 %) HDAC2 (0.266 %) IFT172 (0.266 %) KITLG (0.266 %) PRKCD (0.266 %) SMO (0.266 %) BTRC (0.177 %) CSNK1E (0.177 %) FOXA2 (0.177 %) GNAI1 (0.177 %) GNAI2 (0.177 %) KIF3A (0.177 %) PIAS1 (0.177 %) PRKACA (0.177 %) SU…	0.0224527	0.0371404	0.00754095	0.00377761	0.0112901	0.00754095	0.00377761	0.015025	0.0444013	0.00377761	0.0187459	0.00754095	0.00377761	0.0112901	0.00377761	0.015025	0.00754095	0.00377761	0.00754095	0.00377761	0.00377761	0.0112901	0.015025	0.015025	0.0224527	0.0587592	0.0798926	0.16296	0.0729014	0.065857	0.0587592	0.0334893	0.411317	0.0551901	0.169273	0.288677	0.194048	0.0407777	0.0693859
TP53 Regulates Metabolic Genes	183	85	479684	132.38	109	-0.0843963	0.991093	100	92.6606	AGO4 (0.709 %) TNRC6B (0.620 %) AGO1 (0.531 %) AGO2 (0.531 %) RPTOR (0.443 %) TNRC6C (0.443 %) TSC1 (0.443 %) AKT2 (0.354 %) AKT3 (0.354 %) G6PD (0.354 %) PRKAA2 (0.354 %) TNRC6A (0.354 %) TSC2 (0.354 %) GPI (0.266 %) LAMTOR2 (0.266 %) LRPPRC (0.266 %) MOV10 (0.266 %) PRKAG3 (0.266 %) TP63 (0.266 %) TXNRD1 (0.266 %) PRDX1 (0.177 %) PRKAG2 (0.177 %) RRAGB (0.177 %) RRAGD (0.177 %) TACO1 (0.177 %) …	0.022889	0.0378565	0.00768863	0.00385173	0.0115108	0.00768863	0.00385173	0.0153182	0.0452541	0.00385173	0.0191109	0.00768863	0.00385173	0.0115108	0.00385173	0.0153182	0.00768863	0.00385173	0.00768863	0.00385173	0.00385173	0.0115108	0.0153182	0.0153182	0.022889	0.0598791	0.0813975	0.165883	0.07428	0.0671073	0.0598791	0.0341363	0.417417	0.056244	0.172296	0.293425	0.197459	0.0415625	0.0707006
Drosophila Toll Like Receptor Signaling ( Drosophila Toll Like Receptor Signaling )	27	235	1481942	375.392	342	-0.0404584	0.991361	100	73.0994	PRKCQ (1.063 %) ESPL1 (0.797 %) PDGFRA (0.797 %) PRKCB (0.797 %) MAP3K13 (0.709 %) FGFR2 (0.620 %) JAK2 (0.620 %) MET (0.620 %) PRKG2 (0.620 %) ALK (0.531 %) BTK (0.531 %) INSR (0.531 %) ITK (0.531 %) KIT (0.531 %) TLL2 (0.531 %) IRAK2 (0.443 %) JAK1 (0.443 %) JAK3 (0.443 %) MAP3K10 (0.443 %) NTRK1 (0.443 %) PRKG1 (0.443 %) PSMD1 (0.443 %) RIPK1 (0.443 %) TYK2 (0.443 %) WEE1 (0.443 %) ACVR2A (0.3…	0.0808904	0.131149	0.027725	0.01396	0.0412979	0.027725	0.01396	0.0546814	0.155237	0.01396	0.067878	0.027725	0.01396	0.0412979	0.01396	0.0546814	0.027725	0.01396	0.027725	0.01396	0.01396	0.0412979	0.0546814	0.0546814	0.0808904	0.20143	0.266027	0.483531	0.245097	0.223571	0.20143	0.118848	0.860287	0.190124	0.49785	0.717831	0.551265	0.143278	0.23441
LPA Receptor Mediated Events	255	65	467078	159.013	133	-0.0775822	0.992763	100	86.4662	ADCY9 (1.063 %) ADCY8 (0.709 %) ADCY5 (0.620 %) PLCG1 (0.620 %) ADCY7 (0.531 %) ARHGEF1 (0.531 %) JUN (0.531 %) LPAR4 (0.531 %) ADCY1 (0.443 %) LYN (0.443 %) PLCB3 (0.443 %) TIAM1 (0.443 %) GAB1 (0.354 %) LPAR1 (0.354 %) NFKB1 (0.354 %) PLD2 (0.354 %) PRKD1 (0.354 %) PTK2 (0.354 %) PTK2B (0.354 %) ADCY3 (0.266 %) BCAR1 (0.266 %) GNAO1 (0.266 %) MAPT (0.266 %) MMP2 (0.266 %) PRKCD (0.266 %) PRKCE …	0.0281347	0.04645	0.00946758	0.00474505	0.0141677	0.00946758	0.00474505	0.0188455	0.0554778	0.00474505	0.0235012	0.00946758	0.00474505	0.0141677	0.00474505	0.0188455	0.00946758	0.00474505	0.00946758	0.00474505	0.00474505	0.0141677	0.0188455	0.0188455	0.0281347	0.0732778	0.0993509	0.200324	0.0907424	0.0820517	0.0732778	0.0419038	0.486183	0.0688595	0.207895	0.348235	0.237469	0.0509746	0.0864074
Signaling Events Mediated By VEGFR1 And VEGFR2	126	69	490534	163.454	137	-0.0766753	0.993047	100	89.781	PRKCB (0.797 %) PLCG1 (0.620 %) ROCK1 (0.620 %) ITGAV (0.531 %) ITGB3 (0.531 %) CBL (0.443 %) IQGAP1 (0.443 %) MYOF (0.443 %) CTNNA1 (0.354 %) GAB1 (0.354 %) GRB10 (0.354 %) HGS (0.354 %) KDR (0.354 %) NOS3 (0.354 %) PAK2 (0.354 %) PTK2 (0.354 %) PTK2B (0.354 %) VCL (0.354 %) FLT1 (0.266 %) NEDD4 (0.266 %) PRKCD (0.266 %) PTPRJ (0.266 %) SH2D2A (0.266 %) AKAP1 (0.177 %) ARF1 (0.177 %) CTNNB1 (0.1…	0.0290322	0.0479172	0.00977259	0.00489829	0.014623	0.00977259	0.00489829	0.0194497	0.0572215	0.00489829	0.0242527	0.00977259	0.00489829	0.014623	0.00489829	0.0194497	0.00977259	0.00489829	0.00977259	0.00489829	0.00489829	0.014623	0.0194497	0.0194497	0.0290322	0.0755583	0.102397	0.20609	0.0935384	0.0845925	0.0755583	0.0432307	0.497141	0.0710078	0.213849	0.357205	0.244132	0.0525808	0.0890764
Integrated Breast Cancer Pathway	71	90	641037	171.568	144	-0.0760751	0.994053	100	88.8889	TPR (1.151 %) MYT1 (0.709 %) AR (0.620 %) HDAC1 (0.531 %) BLM (0.443 %) JAK1 (0.443 %) MSH2 (0.443 %) SMAD2 (0.443 %) TSC1 (0.443 %) WEE1 (0.443 %) ARAF (0.354 %) CDC25B (0.354 %) E2F1 (0.354 %) HIPK2 (0.354 %) JAKMIP1 (0.354 %) NFKB1 (0.354 %) USP15 (0.354 %) ZMIZ1 (0.354 %) BARD1 (0.266 %) EDAR (0.266 %) FILIP1 (0.266 %) GSK3A (0.266 %) RAD51 (0.266 %) BACH1 (0.177 %) BID (0.177 %) CDK2 (0.177 …	0.0306895	0.0506241	0.0103363	0.00518158	0.0154643	0.0103363	0.00518158	0.0205658	0.0604372	0.00518158	0.0256408	0.0103363	0.00518158	0.0154643	0.00518158	0.0205658	0.0103363	0.00518158	0.0103363	0.00518158	0.00518158	0.0154643	0.0205658	0.0205658	0.0306895	0.07976	0.108002	0.216643	0.0986855	0.0892719	0.07976	0.0456792	0.516791	0.0749669	0.22474	0.373467	0.2563	0.0555434	0.0939909
Interferon Alpha/beta Signaling	228	67	332128	115.507	92	-0.0988191	0.994275	100	91.3043	ADAR (0.443 %) JAK1 (0.443 %) TYK2 (0.443 %) IFNA2 (0.354 %) MX2 (0.354 %) OAS2 (0.354 %) HLA-E (0.266 %) IRF3 (0.266 %) IRF9 (0.266 %) OAS1 (0.266 %) OAS3 (0.266 %) OASL (0.266 %) PSMB8 (0.266 %) RNASEL (0.266 %) STAT2 (0.266 %) HLA-F (0.177 %) HLA-G (0.177 %) IFI35 (0.177 %) IFITM3 (0.177 %) IFNA14 (0.177 %) IFNA4 (0.177 %) IFNA6 (0.177 %) IRF6 (0.177 %) MX1 (0.177 %) PTPN11 (0.177 %) SAMHD1 (0…	0.0196838	0.0325907	0.00660481	0.00330788	0.00989084	0.00660481	0.00330788	0.013166	0.0389802	0.00330788	0.0164303	0.00660481	0.00330788	0.00989084	0.00330788	0.013166	0.00660481	0.00330788	0.00660481	0.00330788	0.00330788	0.00989084	0.013166	0.013166	0.0196838	0.051633	0.0703005	0.144208	0.0641192	0.0578968	0.051633	0.02938	0.371155	0.0484855	0.14986	0.257849	0.172099	0.0357908	0.0610132
Regulation Of TP53 Degradation	171	35	270053	77.828	57	-0.135261	0.996403	100	92.9825	UBC (0.797 %) RICTOR (0.709 %) CCNA2 (0.443 %) AKT2 (0.354 %) AKT3 (0.354 %) SGK1 (0.354 %) USP7 (0.354 %) MDM4 (0.266 %) PPP2CB (0.266 %) CDK2 (0.177 %) DAXX (0.177 %) MAPKAP1 (0.177 %) MDM2 (0.177 %) PPP2CA (0.177 %) PPP2R1A (0.177 %) USP2 (0.177 %) PPP2R5C (0.089 %) RFFL (0.089 %) UBA52 (0.089 %)	0.0128426	0.0213126	0.00429934	0.00215198	0.00644207	0.00429934	0.00215198	0.00858019	0.0255203	0.00215198	0.0107137	0.00429934	0.00215198	0.00644207	0.00215198	0.00858019	0.00429934	0.00215198	0.00429934	0.00215198	0.00215198	0.00644207	0.00858019	0.00858019	0.0128426	0.0338815	0.0462891	0.0962949	0.042171	0.0380352	0.0338815	0.019202	0.260368	0.031798	0.10018	0.176249	0.115555	0.0234187	0.0401053
Apoptosis Signaling Pathway	333	104	663734	193.596	161	-0.0800716	0.997766	100	85.7143	MADD (1.151 %) PRKCQ (1.063 %) PRKCB (0.797 %) PIK3CG (0.620 %) APAF1 (0.531 %) IGF2R (0.531 %) JUN (0.531 %) RIPK1 (0.443 %) AKT2 (0.354 %) AKT3 (0.354 %) ATF4 (0.354 %) ATF6 (0.354 %) IKBKB (0.354 %) MAP4K3 (0.354 %) NFKB1 (0.354 %) PIK3CD (0.354 %) BCL2L11 (0.266 %) EIF2AK2 (0.266 %) HSPA2 (0.266 %) MAP4K4 (0.266 %) PRKCD (0.266 %) PRKCE (0.266 %) REL (0.266 %) AIFM1 (0.177 %) ATF2 (0.177 %) B…	0.0353039	0.0581446	0.0119092	0.00597245	0.0178105	0.0119092	0.00597245	0.0236766	0.0693614	0.00597245	0.0295077	0.0119092	0.00597245	0.0178105	0.00597245	0.0236766	0.0119092	0.00597245	0.0119092	0.00597245	0.00597245	0.0178105	0.0236766	0.0236766	0.0353039	0.0913957	0.123473	0.245384	0.112908	0.102217	0.0913957	0.0524856	0.567706	0.0859366	0.254371	0.416746	0.289261	0.0637698	0.107578
CDC42 Signaling Events	13	71	528189	160.647	130	-0.0919294	0.99798	100	85.3846	CDC42BPA (1.063 %) DLG1 (0.620 %) EPS8 (0.531 %) IQGAP3 (0.531 %) JUN (0.531 %) PLD1 (0.531 %) CBL (0.443 %) DIAPH3 (0.443 %) EXOC7 (0.443 %) IQGAP1 (0.443 %) LIMK1 (0.443 %) RASGRF1 (0.443 %) TIAM1 (0.443 %) ARHGEF6 (0.354 %) CTNNA1 (0.354 %) ENAH (0.354 %) PAK2 (0.354 %) RPS6KB1 (0.354 %) TNK2 (0.354 %) ARHGEF7 (0.266 %) BCAR1 (0.266 %) PLPP1 (0.266 %) PRKCE (0.266 %) YES1 (0.266 %) ACTR2 (0.17…	0.0284641	0.0469886	0.0095795	0.00480128	0.0143348	0.0095795	0.00480128	0.0190672	0.056118	0.00480128	0.023777	0.0095795	0.00480128	0.0143348	0.00480128	0.0190672	0.0095795	0.00480128	0.0095795	0.00480128	0.00480128	0.0143348	0.0190672	0.0190672	0.0284641	0.0741152	0.10047	0.202444	0.0917693	0.0829847	0.0741152	0.0423908	0.490231	0.0696483	0.210084	0.35154	0.23992	0.0515643	0.0873876
MTOR Signaling Pathway	83	66	458106	141.08	112	-0.100247	0.997997	100	88.3929	RB1CC1 (0.974 %) RICTOR (0.709 %) PPARGC1A (0.620 %) PLD1 (0.531 %) RPTOR (0.443 %) TSC1 (0.443 %) CLIP1 (0.354 %) EEF2 (0.354 %) EEF2K (0.354 %) EIF4A1 (0.354 %) IKBKB (0.354 %) PLD2 (0.354 %) RPS6KB1 (0.354 %) SGK1 (0.354 %) TSC2 (0.354 %) ULK2 (0.354 %) IRS1 (0.266 %) ATG13 (0.177 %) BTRC (0.177 %) CCNE1 (0.177 %) CDK2 (0.177 %) EIF4B (0.177 %) MAPK1 (0.177 %) MAPK3 (0.177 %) MAPKAP1 (0.177 %)…	0.024577	0.0406252	0.00826039	0.00413876	0.012365	0.00826039	0.00413876	0.0164525	0.04855	0.00413876	0.0205232	0.00826039	0.00413876	0.012365	0.00413876	0.0164525	0.00826039	0.00413876	0.00826039	0.00413876	0.00413876	0.012365	0.0164525	0.0164525	0.024577	0.0642038	0.0872029	0.177104	0.0796	0.0719338	0.0642038	0.0366381	0.440453	0.0603146	0.183901	0.311515	0.210534	0.0445958	0.0757749
Integrin Linked Kinase Signaling	254	46	312994	117.014	90	-0.113994	0.998119	100	92.2222	RICTOR (0.709 %) XPO1 (0.620 %) ZEB1 (0.620 %) JUN (0.531 %) PPP1R12A (0.531 %) DIAPH1 (0.443 %) IQGAP1 (0.443 %) TNS1 (0.443 %) ARHGEF6 (0.354 %) CKAP5 (0.354 %) ELMO2 (0.354 %) LIMS1 (0.354 %) ARHGEF7 (0.266 %) CDC37 (0.266 %) PARP1 (0.266 %) TACC3 (0.266 %) ACTN1 (0.177 %) CREB1 (0.177 %) CTNNB1 (0.177 %) RUVBL1 (0.177 %) SNAI1 (0.177 %) AURKA (0.089 %) CCND1 (0.089 %) GIT2 (0.089 %) GSK3B (0.…	0.0199665	0.0330554	0.00670028	0.00335577	0.0100336	0.00670028	0.00335577	0.0133557	0.0395342	0.00335577	0.0166666	0.00670028	0.00335577	0.0100336	0.00335577	0.0133557	0.00670028	0.00335577	0.00670028	0.00335577	0.00335577	0.0100336	0.0133557	0.0133557	0.0199665	0.0523619	0.0712829	0.146139	0.0650182	0.0587113	0.0523619	0.0297997	0.375371	0.0491711	0.15186	0.261052	0.174363	0.0363003	0.0618701
Negative Regulation Of MAPK Pathway	87	38	220828	81.45	58	-0.147463	0.998518	100	96.5517	UBC (0.797 %) DUSP16 (0.443 %) ARAF (0.354 %) DUSP10 (0.266 %) PPP2CB (0.266 %) PPP2R5D (0.266 %) BRAP (0.177 %) DUSP7 (0.177 %) KSR1 (0.177 %) MAPK1 (0.177 %) MAPK3 (0.177 %) MARK3 (0.177 %) PPP2CA (0.177 %) PPP2R1A (0.177 %) PPP2R5B (0.177 %) PPP2R5E (0.177 %) DUSP1 (0.089 %) DUSP4 (0.089 %) DUSP6 (0.089 %) DUSP9 (0.089 %) HRAS (0.089 %) PAQR3 (0.089 %) PEBP1 (0.089 %) PPP2R5A (0.089 %) PPP2R5C…	0.0134818	0.0223686	0.00451429	0.0022597	0.00676379	0.00451429	0.0022597	0.0090082	0.0267819	0.0022597	0.0112475	0.00451429	0.0022597	0.00676379	0.0022597	0.0090082	0.00451429	0.0022597	0.00451429	0.0022597	0.0022597	0.00676379	0.0090082	0.0090082	0.0134818	0.0355488	0.0485514	0.100869	0.0442368	0.0399026	0.0355488	0.0201544	0.271462	0.0333645	0.104927	0.184214	0.120981	0.0245777	0.0420722
Insulin Receptor Signaling ( Insulin Receptor Signaling (D. Melanogaster) )// Insulin Receptor Signaling (Mammal) ( Insulin Receptor Signaling (Mammal) )	69	62	435972	116.057	88	-0.120188	0.998751	100	95.4545	IRS4 (0.797 %) INSR (0.531 %) PPP2R4 (0.531 %) RPTOR (0.443 %) AKT2 (0.354 %) AKT3 (0.354 %) ARAF (0.354 %) PIK3CD (0.354 %) PRKAA2 (0.354 %) TSC2 (0.354 %) IRS1 (0.266 %) PPP2R5D (0.266 %) PRKAG3 (0.266 %) SHC3 (0.266 %) FKBP8 (0.177 %) GRB2 (0.177 %) PPP2R1A (0.177 %) PPP2R3A (0.177 %) PPP2R5B (0.177 %) PPP2R5E (0.177 %) PRKAG2 (0.177 %) GSK3B (0.089 %) HRAS (0.089 %) PPP2R3B (0.089 %) PPP2R5A …	0.019787	0.0327603	0.00663964	0.00332535	0.00994291	0.00663964	0.00332535	0.0132352	0.0391824	0.00332535	0.0165165	0.00663964	0.00332535	0.00994291	0.00332535	0.0132352	0.00663964	0.00332535	0.00663964	0.00332535	0.00332535	0.00994291	0.0132352	0.0132352	0.019787	0.051899	0.070659	0.144913	0.0644473	0.058194	0.051899	0.0295331	0.372696	0.0487357	0.15059	0.259019	0.172926	0.0359767	0.0613259
Neurotrophic Factor Mediated Trk Receptor Signaling	256	63	455108	162.622	128	-0.10397	0.9994	100	88.2812	NTRK2 (0.620 %) PLCG1 (0.620 %) ABL1 (0.531 %) DNM1 (0.531 %) KIDINS220 (0.531 %) NEDD4L (0.531 %) NTRK3 (0.531 %) STAT3 (0.531 %) MAGED1 (0.443 %) MCF2L (0.443 %) NTRK1 (0.443 %) RAPGEF1 (0.443 %) RASGRF1 (0.443 %) TIAM1 (0.443 %) BDNF (0.354 %) GAB1 (0.354 %) GAB2 (0.354 %) SQSTM1 (0.354 %) ARHGAP32 (0.266 %) ELMO1 (0.266 %) FRS3 (0.266 %) RASA1 (0.266 %) SHC3 (0.266 %) ACKR1 (0.177 %) DNAJA3 (…	0.0288635	0.0476416	0.00971526	0.00486949	0.0145374	0.00971526	0.00486949	0.0193361	0.056894	0.00486949	0.0241115	0.00971526	0.00486949	0.0145374	0.00486949	0.0193361	0.00971526	0.00486949	0.00971526	0.00486949	0.00486949	0.0145374	0.0193361	0.0193361	0.0288635	0.07513	0.101825	0.205009	0.0930134	0.0841154	0.07513	0.0429814	0.495099	0.0706043	0.212733	0.355528	0.242884	0.0522791	0.0885753
TGF Beta Receptor Signaling	177	53	386804	139.775	102	-0.136829	0.999922	100	93.1373	SPTBN1 (0.797 %) ZFYVE16 (0.620 %) NEDD4L (0.531 %) DAB2 (0.443 %) ITCH (0.443 %) SMAD2 (0.443 %) RPS6KB1 (0.354 %) ZFYVE9 (0.354 %) AXIN1 (0.266 %) CTGF (0.266 %) EIF2A (0.266 %) PPP2CB (0.266 %) RNF111 (0.266 %) TAB2 (0.266 %) TFAP2B (0.266 %) YAP1 (0.266 %) CAMK2A (0.177 %) CTNNB1 (0.177 %) DAXX (0.177 %) GRB2 (0.177 %) PPP1R15A (0.177 %) PPP2CA (0.177 %) PPP2R2A (0.177 %) SMAD3 (0.177 %) SMUR…	0.0243222	0.0402075	0.00817404	0.00409541	0.012236	0.00817404	0.00409541	0.0162813	0.0480529	0.00409541	0.02031	0.00817404	0.00409541	0.012236	0.00409541	0.0162813	0.00817404	0.00409541	0.00817404	0.00409541	0.00409541	0.012236	0.0162813	0.0162813	0.0243222	0.0635518	0.0863283	0.175419	0.0787983	0.0712063	0.0635518	0.0362606	0.437033	0.0597009	0.182159	0.308812	0.208573	0.0441382	0.0750101
SnoN Degradation Signaling ( TGF Beta Super Family Signaling Pathway(canonical) )// TGF Beta Receptor Complex Degradation Signaling ( TGF Beta Super Family Signaling Pathway(canonical) )// TGF Beta Receptor I Degradation Signaling ( TGF Beta Super Family Signaling Pathway(canonical) )	237	51	324185	102.145	69	-0.17037	0.999932	100	89.8551	PSMD1 (0.443 %) SMAD2 (0.443 %) ACVR2A (0.354 %) AMHR2 (0.354 %) PSMA3 (0.354 %) PSMD2 (0.354 %) PSMD4 (0.354 %) BMPR1B (0.266 %) PSMB8 (0.266 %) PSMC4 (0.266 %) SKIL (0.266 %) PSMA6 (0.177 %) PSMB6 (0.177 %) PSMD11 (0.177 %) PSMD12 (0.177 %) PSMD5 (0.177 %) PSMD6 (0.177 %) PSMD7 (0.177 %) SMURF1 (0.177 %) SMURF2 (0.177 %) TGFBR1 (0.177 %) ACVR1 (0.089 %) ACVR2B (0.089 %) ACVRL1 (0.089 %) PSMA1 (…	0.0172088	0.0285165	0.00576948	0.00288891	0.00864173	0.00576948	0.00288891	0.0115057	0.0341214	0.00288891	0.0143614	0.00576948	0.00288891	0.00864173	0.00288891	0.0115057	0.00576948	0.00288891	0.00576948	0.00288891	0.00288891	0.00864173	0.0115057	0.0115057	0.0172088	0.0452345	0.0616648	0.127136	0.0562197	0.050743	0.0452345	0.0257018	0.333045	0.0424683	0.132172	0.22924	0.152027	0.031323	0.0534853
Intracellular Signalling Through Adenosine Receptor A2a And Adenosine// Intracellular Signalling Through Adenosine Receptor A2b And Adenosine	75	39	272781	89.1814	58	-0.186846	0.999935	100	96.5517	JUN (0.531 %) MAP3K4 (0.531 %) IKBKB (0.354 %) NFKB1 (0.354 %) ARHGEF7 (0.266 %) GNAS (0.266 %) RAPGEF2 (0.266 %) ADCY2 (0.177 %) ADORA2A (0.177 %) ATF2 (0.177 %) CHUK (0.177 %) CREB1 (0.177 %) ELK1 (0.177 %) MAP2K7 (0.177 %) MAPK1 (0.177 %) MAPK8 (0.177 %) NFKB2 (0.177 %) NFKBIA (0.177 %) RPS6KA1 (0.177 %) ADORA2B (0.089 %) GNB1 (0.089 %) HRAS (0.089 %) MAP2K2 (0.089 %) MAP2K6 (0.089 %) PAK1 (0.…	0.0148592	0.0246425	0.0049778	0.00249201	0.00745741	0.0049778	0.00249201	0.00993083	0.0294976	0.00249201	0.0123981	0.0049778	0.00249201	0.00745741	0.00249201	0.00993083	0.0049778	0.00249201	0.0049778	0.00249201	0.00249201	0.00745741	0.00993083	0.00993083	0.0148592	0.0391355	0.0534132	0.110655	0.0486777	0.0439185	0.0391355	0.0222058	0.29483	0.036735	0.115082	0.201133	0.132571	0.0270731	0.046301
TNFalpha	344	274	1805329	436.709	381	-0.0592672	0.999944	100	72.1785	ERBB3 (1.329 %) MADD (1.151 %) PRKCQ (1.063 %) PEG3 (0.974 %) MYLK (0.886 %) TRAPPC9 (0.886 %) CREBBP (0.797 %) RASAL2 (0.797 %) IKBKAP (0.709 %) NLRP4 (0.709 %) KTN1 (0.620 %) POLR1A (0.620 %) APAF1 (0.531 %) ARHGEF1 (0.531 %) FANCD2 (0.531 %) FLNA (0.531 %) HDAC1 (0.531 %) JUN (0.531 %) OTUD7B (0.531 %) PPP1R12A (0.531 %) COPS3 (0.443 %) HDAC6 (0.443 %) IQGAP2 (0.443 %) ITCH (0.443 %) PSMD1 (0.…	0.0999843	0.161023	0.034505	0.017404	0.0513084	0.034505	0.017404	0.0678194	0.189972	0.017404	0.084043	0.034505	0.017404	0.0513084	0.017404	0.0678194	0.034505	0.017404	0.034505	0.017404	0.017404	0.0513084	0.0678194	0.0678194	0.0999843	0.244907	0.320405	0.561847	0.296117	0.270962	0.244907	0.146163	0.914394	0.231533	0.576966	0.794055	0.6324	0.175624	0.28365
AndrogenReceptor	303	167	1169403	306.496	255	-0.0798848	0.999945	100	79.6078	NCOA3 (0.886 %) CREBBP (0.797 %) NCOA6 (0.709 %) AR (0.620 %) KDM3A (0.620 %) NCOR2 (0.620 %) SVIL (0.620 %) WHSC1 (0.620 %) FLNA (0.531 %) HDAC1 (0.531 %) IL6ST (0.531 %) JUN (0.531 %) NCOA1 (0.531 %) STAT3 (0.531 %) TCF4 (0.531 %) ETV5 (0.443 %) KDM4C (0.443 %) RAD54L2 (0.443 %) RNF6 (0.443 %) SIN3A (0.443 %) BRINP1 (0.354 %) CDC25B (0.354 %) HSPA4 (0.354 %) NCOA4 (0.354 %) NR3C1 (0.354 %) NRIP…	0.0618758	0.100984	0.0210659	0.010589	0.0314319	0.0210659	0.010589	0.0416881	0.119923	0.010589	0.0518357	0.0210659	0.010589	0.0314319	0.010589	0.0416881	0.0210659	0.010589	0.0210659	0.010589	0.010589	0.0314319	0.0416881	0.0416881	0.0618758	0.156612	0.208797	0.393674	0.191771	0.174379	0.156612	0.0913629	0.774711	0.147586	0.406447	0.616377	0.454904	0.110504	0.183121
Interferon Gamma Signaling	229	88	703713	182.084	134	-0.133167	0.999993	100	86.5672	JAK2 (0.620 %) GBP4 (0.531 %) MID1 (0.531 %) SP100 (0.531 %) JAK1 (0.443 %) NCAM1 (0.443 %) VCAM1 (0.443 %) CAMK2D (0.354 %) GBP3 (0.354 %) GBP5 (0.354 %) GBP6 (0.354 %) GBP7 (0.354 %) OAS2 (0.354 %) TRIM10 (0.354 %) TRIM38 (0.354 %) TRIM46 (0.354 %) B2M (0.266 %) HLA-E (0.266 %) IRF3 (0.266 %) IRF9 (0.266 %) OAS1 (0.266 %) OAS3 (0.266 %) OASL (0.266 %) PRKCD (0.266 %) TRIM21 (0.266 %) TRIM25 (0.…	0.032871	0.0541826	0.0110793	0.00555508	0.0165728	0.0110793	0.00555508	0.0220359	0.0646616	0.00555508	0.0274685	0.0110793	0.00555508	0.0165728	0.00555508	0.0220359	0.0110793	0.00555508	0.0110793	0.00555508	0.00555508	0.0165728	0.0220359	0.0220359	0.032871	0.0852726	0.115341	0.230348	0.105429	0.0954071	0.0852726	0.0488991	0.541539	0.0801628	0.238875	0.394288	0.27205	0.0594367	0.100432
ErbB1 Downstream Signaling	34	105	714254	192.031	141	-0.134152	0.999997	100	87.9433	RICTOR (0.709 %) CYFIP2 (0.620 %) NCKAP1 (0.620 %) EPS8 (0.531 %) JUN (0.531 %) PLD1 (0.531 %) STAT3 (0.531 %) CHN2 (0.443 %) DIAPH3 (0.443 %) IQGAP1 (0.443 %) GAB1 (0.354 %) PLD2 (0.354 %) RPS6KA3 (0.354 %) RPS6KA5 (0.354 %) CAPN2 (0.266 %) EGF (0.266 %) MAP2K5 (0.266 %) MEF2C (0.266 %) PRKCD (0.266 %) RIN1 (0.266 %) SH2D2A (0.266 %) ABI1 (0.177 %) ACTR2 (0.177 %) ARPC2 (0.177 %) ATF2 (0.177 %) …	0.0349702	0.0576016	0.0117953	0.00591516	0.0176407	0.0117953	0.00591516	0.0234515	0.0687175	0.00591516	0.029228	0.0117953	0.00591516	0.0176407	0.00591516	0.0234515	0.0117953	0.00591516	0.0117953	0.00591516	0.00591516	0.0176407	0.0234515	0.0234515	0.0349702	0.0905575	0.122361	0.243337	0.111885	0.101285	0.0905575	0.051994	0.564204	0.085146	0.252263	0.413712	0.286922	0.0631761	0.106601
TGF Beta Receptor	176	220	1547821	399.828	327	-0.0873258	1	100	75.5352	CREBBP (0.797 %) SPTBN1 (0.797 %) NUP153 (0.709 %) NUP214 (0.709 %) PARD3 (0.709 %) AR (0.620 %) CTNNA2 (0.620 %) EWSR1 (0.620 %) ROCK1 (0.620 %) XPO1 (0.620 %) ZEB1 (0.620 %) ZFYVE16 (0.620 %) ANAPC5 (0.531 %) EIF3I (0.531 %) HDAC1 (0.531 %) ITGB3 (0.531 %) JUN (0.531 %) NCOA1 (0.531 %) NEDD4L (0.531 %) RBL1 (0.531 %) STK11IP (0.531 %) TCF4 (0.531 %) ZEB2 (0.531 %) DAB2 (0.443 %) DYNC1I1 (0.443 …	0.0882347	0.142689	0.0303217	0.0152775	0.045136	0.0303217	0.0152775	0.0597239	0.168684	0.0152775	0.074089	0.0303217	0.0152775	0.045136	0.0152775	0.0597239	0.0303217	0.0152775	0.0303217	0.0152775	0.0152775	0.045136	0.0597239	0.0597239	0.0882347	0.218333	0.287303	0.51499	0.265018	0.242035	0.218333	0.129388	0.884139	0.206206	0.529696	0.749824	0.584195	0.155786	0.253615
[truncated: 1,090 more columns]

## Sheet: COREAD.csv
Pathway	Internal Id	n.genes.in.rep	total Exonic Content Block length	(E)xpected n.mut in path	(O)bserved n.mut in path	log10 (oddRatio=(O/E))	pval	% FDR	ExclusiveCoverage	Mutated Genes	prob TCGA-A6-2670-01	prob TCGA-A6-2671-01	prob TCGA-A6-2672-01	prob TCGA-A6-2674-01	prob TCGA-A6-2676-01	prob TCGA-A6-2677-01	prob TCGA-A6-2678-01	prob TCGA-A6-2683-01	prob TCGA-A6-3807-01	prob TCGA-A6-3808-01	prob TCGA-A6-3809-01	prob TCGA-A6-3810-01	prob TCGA-A6-4105-01	prob TCGA-A6-5656-01	prob TCGA-A6-5657-01	prob TCGA-A6-5659-01	prob TCGA-A6-5660-01	prob TCGA-A6-5661-01	prob TCGA-A6-5662-01	prob TCGA-A6-5664-01	prob TCGA-A6-5665-01	prob TCGA-A6-5666-01	prob TCGA-A6-6137-01	prob TCGA-A6-6138-01	prob TCGA-A6-6141-01	prob TCGA-A6-6142-01	prob TCGA-A6-6648-01	prob TCGA-A6-6649-01	prob TCGA-A6-6651-01	prob TCGA-A6-6652-01	prob TCGA-A6-6653-01	prob TCGA-A6-6654-01	prob TCGA-A6-6780-01	prob TCGA-A6-6781-01	prob TCGA-A6-6782-01	prob TCGA-AA-3489-01	prob TCGA-AA-3492-01	prob TCGA-AA-3496-01	prob TCGA-AA-3502-01
Tetrachlorodibenzodioxin Inhibits The Reaction [[AHR Protein Binds To CDK4 Protein// CCND1 Protein] Results In Increased Phosphorylation Of RB1 Protein]	175	4	20828	27.5971	109	0.596563	5.62139e-15	2.25308e-11	92.6606	RB1 (20.65 %) AHR ( 2.04 %) CDK4 ( 0.82 %) CCND1 ( 0.41 %)	0.00396493	0.0159829	0.0808555	0.00396493	0.110198	0.0111932	0.0116296	0.0140263	0.0140263	0.017502	0.132882	0.0194517	0.0389493	0.0218294	0.0346976	0.0476068	0.0427598	0.208777	0.0269972	0.0140263	0.303388	0.0436046	0.0237705	0.0265676	0.148998	0.0188022	0.0233395	0.0274266	0.0278558	0.0220453	0.186464	0.0376758	0.187541	0.280574	0.0304272	0.0205332	0.296124	0.0480271	0.0317103
FOXM1 Transcription Factor Network	314	43	236224	152.969	252	0.216796	6.16615e-15	2.25308e-11	53.1746	RB1 (20.65 %) BRCA2 (12.68 %) CENPF ( 9.61 %) EP300 ( 9.20 %) LAMA4 ( 6.54 %) CHEK2 ( 5.73 %) ESR1 ( 4.29 %) MMP2 ( 3.07 %) NFATC3 ( 3.07 %) ETV5 ( 2.86 %) PLK1 ( 2.86 %) XRCC1 ( 2.04 %) CDC25B ( 1.84 %) CCNB1 ( 1.64 %) CDK1 ( 1.43 %) FOXM1 ( 1.43 %) SP1 ( 1.43 %) CCNE1 ( 1.23 %) GSK3A ( 1.23 %) CCNB2 ( 1.02 %) CDK2 ( 1.02 %) CDKN2A ( 1.02 %) FOS ( 1.02 %) HIST1H2BA ( 1.02 %) MYC ( 1.02 %) CCNA2 …	0.0388225	0.148354	0.568427	0.0388225	0.687667	0.106125	0.110049	0.131325	0.131325	0.161368	0.758543	0.177808	0.326967	0.197464	0.296696	0.385012	0.353096	0.90309	0.238735	0.131325	0.972765	0.358763	0.213196	0.235378	0.799721	0.172364	0.209727	0.242077	0.245404	0.199228	0.872138	0.318025	0.873814	0.96245	0.265063	0.186801	0.969798	0.387712	0.274699
ERBB2 Activates PTK6 Signaling// Signaling By ERBB4	35	13	91539	80.7575	142	0.245106	6.69304e-15	2.25308e-11	74.6479	ERBB4 (11.45 %) ERBB2 ( 7.36 %) NRG1 ( 6.13 %) ERBB3 ( 5.93 %) NRG3 ( 3.27 %) NRG2 ( 1.64 %) EGF ( 1.23 %) BTC ( 0.61 %) EREG ( 0.61 %) PTK6 ( 0.61 %) NRG4 ( 0.41 %) HBEGF ( 0.20 %)	0.0148765	0.0589752	0.272459	0.0148765	0.356278	0.0415777	0.0431725	0.0518965	0.0518965	0.0644443	0.416034	0.0714292	0.139191	0.0798957	0.124735	0.168083	0.151997	0.586656	0.0981008	0.0518965	0.744347	0.154817	0.0867653	0.0965976	0.455937	0.0691067	0.0852431	0.0996016	0.1011	0.0806615	0.540932	0.13488	0.54322	0.711298	0.110037	0.0752872	0.734143	0.169467	0.114472
Phosphorylation Of Proteins Involved In G1/S Transition By Active Cyclin E:Cdk2 Complexes	97	4	17010	23.0414	109	0.674918	6.72249e-15	2.25308e-11	94.4954	RB1 (20.65 %) CCNE1 ( 1.23 %) CDK2 ( 1.02 %) CCNE2 ( 0.61 %)	0.0032393	0.0130723	0.0665395	0.0032393	0.0909488	0.00915078	0.00950792	0.0114699	0.0114699	0.0143168	0.10992	0.0159145	0.0319248	0.0178638	0.0284286	0.0390529	0.0350607	0.174073	0.0221034	0.0114699	0.255658	0.0357562	0.0194558	0.0217508	0.123453	0.0153822	0.0191023	0.0224559	0.0228083	0.0180408	0.1551	0.0308773	0.156013	0.235809	0.0249197	0.016801	0.249325	0.0393993	0.0259737
Integrated Cancer Pathway	319	36	278494	143.555	225	0.195164	7.2329e-15	2.25308e-11	49.7778	RB1 (20.65 %) MSH6 (10.84 %) ATR ( 9.41 %) MSH2 ( 7.36 %) BRCA1 ( 6.34 %) CHEK2 ( 5.73 %) BLM ( 4.91 %) RAD50 ( 4.70 %) JAK1 ( 4.09 %) SMAD3 ( 3.89 %) BAX ( 3.27 %) STAT1 ( 3.27 %) MAP3K5 ( 2.86 %) MRE11A ( 2.86 %) CHEK1 ( 2.45 %) AKT1 ( 2.25 %) MDM2 ( 1.84 %) CASP9 ( 1.43 %) CDK1 ( 1.43 %) CDK2 ( 1.02 %) POU2F1 ( 1.02 %) CASP3 ( 0.82 %) CDK4 ( 0.82 %) MMP1 ( 0.82 %) NOXA1 ( 0.82 %) BCL2 ( 0.41 %…	0.0349919	0.134505	0.530417	0.0349919	0.648939	0.0959945	0.0995651	0.118953	0.118953	0.146411	0.721495	0.161478	0.299659	0.179533	0.271386	0.354235	0.324165	0.877486	0.217588	0.118953	0.960887	0.329493	0.194016	0.214485	0.764611	0.156486	0.19082	0.220678	0.223756	0.181155	0.842794	0.291294	0.844649	0.947786	0.241972	0.169734	0.957075	0.356785	0.250919
Inhibition Of Replication Initiation Of Damaged DNA By RB1/E2F1	157	12	73302	68.8792	130	0.275855	7.48497e-15	2.25308e-11	86.1538	RB1 (20.65 %) POLA1 ( 2.45 %) TFDP1 ( 2.04 %) POLA2 ( 1.23 %) PPP2R3B ( 1.02 %) PRIM2 ( 1.02 %) PPP2R1B ( 0.82 %) PRIM1 ( 0.82 %) PPP2CA ( 0.61 %) PPP2CB ( 0.61 %)	0.0120132	0.0478333	0.226237	0.0120132	0.298961	0.0336638	0.0349606	0.0420619	0.0420619	0.052298	0.351926	0.0580077	0.113841	0.0649394	0.101861	0.137904	0.124487	0.509533	0.0798868	0.0420619	0.667068	0.126835	0.0705729	0.0786503	0.387877	0.0561083	0.069324	0.0811215	0.0823547	0.0655671	0.466233	0.110264	0.468379	0.632778	0.0897187	0.0611648	0.656394	0.139061	0.0933785
Processive Synthesis On The C Strand Of The Telomere// Telomere C Strand (Lagging Strand) Synthesis	215	6	25157	29.0831	81	0.444844	7.7379e-15	2.25308e-11	83.9506	LIG1 (11.45 %) POLD1 ( 3.89 %) POLD3 ( 2.86 %) PCNA ( 1.02 %) POLD2 ( 0.41 %)	0.00420809	0.0169567	0.0856057	0.00420809	0.11656	0.011877	0.0123399	0.0148818	0.0148818	0.0185675	0.140447	0.0206347	0.0412929	0.0231553	0.0367903	0.0504575	0.0453272	0.220082	0.0286323	0.0148818	0.318694	0.0462214	0.0252128	0.0281771	0.157394	0.0199461	0.0247559	0.0290873	0.0295422	0.0233841	0.196717	0.0399443	0.197845	0.294987	0.0322666	0.0217812	0.311151	0.0509023	0.0336259
Apoptotic Cleavage Of Cell Adhesion Proteins	334	11	83628	79.5876	152	0.280998	7.94902e-15	2.25308e-11	78.2895	CDH1 (17.59 %) DSP ( 5.52 %) DSG1 ( 4.29 %) TJP1 ( 4.29 %) TJP2 ( 3.07 %) DSG3 ( 2.86 %) DSG2 ( 2.45 %) PKP1 ( 2.04 %) CASP3 ( 0.82 %) OCLN ( 0.41 %)	0.0145826	0.057836	0.267838	0.0145826	0.35061	0.0407672	0.0423316	0.0508903	0.0508903	0.063203	0.409748	0.0700586	0.136619	0.0783695	0.122411	0.16503	0.14921	0.579323	0.0962454	0.0508903	0.737311	0.151982	0.085114	0.0947691	0.449306	0.067779	0.0836195	0.0977194	0.0991909	0.0791213	0.533763	0.132381	0.536041	0.70407	0.10797	0.0738455	0.72704	0.166392	0.112327
Formation Of Senescence Associated Heterochromatin Foci (SAHF)	210	17	84842	80.2681	171	0.328453	8.06286e-15	2.25308e-11	70.7602	RB1 (20.65 %) EP400 ( 9.41 %) CABIN1 ( 4.09 %) HIRA ( 2.66 %) UBN1 ( 2.66 %) LMNB1 ( 1.84 %) HIST1H1A ( 1.64 %) HIST1H1B ( 1.23 %) HIST1H1C ( 1.23 %) HIST1H1E ( 1.23 %) HIST1H1D ( 1.02 %) ASF1A ( 0.61 %) CDKN1A ( 0.41 %) HMGA1 ( 0.20 %) HMGA2 ( 0.20 %)	0.0147532	0.0584975	0.270524	0.0147532	0.353907	0.0412378	0.0428199	0.0514746	0.0514746	0.0639238	0.413406	0.0708546	0.138113	0.0792558	0.123761	0.166804	0.150829	0.583596	0.0973231	0.0514746	0.741419	0.153629	0.086073	0.0958311	0.453165	0.06855	0.0845625	0.0988126	0.1003	0.0800158	0.537939	0.133833	0.540222	0.708288	0.109171	0.0746828	0.731186	0.168179	0.113573
IFN Gamma Signaling Pathway(JAK1 JAK2 STAT1) ( IFN Gamma Signaling(JAK1 JAK2 STAT1) )	196	6	25464	32.8873	79	0.380599	8.42511e-15	2.25308e-11	84.8101	JAK2 (9.82 %) JAK1 (4.09 %) STAT1 (3.27 %) IFNGR1 (1.43 %) IFNGR2 (1.02 %) IFNG (0.61 %)	0.00484533	0.0195055	0.0979439	0.00484533	0.133025	0.0136675	0.0141997	0.0171214	0.0171214	0.0213558	0.159969	0.0237296	0.0474103	0.0266231	0.0422555	0.0578911	0.0520259	0.248962	0.0329064	0.0171214	0.357248	0.0530486	0.0289841	0.0323844	0.179017	0.022939	0.0284599	0.0334282	0.0339497	0.0268857	0.222988	0.0458668	0.224245	0.33142	0.0370728	0.0250459	0.349044	0.0583994	0.0386306
ErbB Receptor Signaling Network	32	15	100451	82.459	144	0.242124	8.70688e-15	2.25308e-11	74.3056	ERBB4 (11.45 %) ERBB2 ( 7.36 %) NRG1 ( 6.13 %) ERBB3 ( 5.93 %) NRG3 ( 3.27 %) HSP90AA1 ( 1.84 %) NRG2 ( 1.64 %) EGF ( 1.23 %) BTC ( 0.61 %) EREG ( 0.61 %) NRG4 ( 0.41 %) HBEGF ( 0.20 %)	0.0153088	0.0606487	0.279204	0.0153088	0.364528	0.0427688	0.0444082	0.0533749	0.0533749	0.0662675	0.42516	0.0734422	0.142961	0.0821365	0.128144	0.172554	0.156081	0.597213	0.100824	0.0533749	0.754356	0.158969	0.0891892	0.099281	0.465549	0.0710567	0.0876267	0.102364	0.103901	0.0829228	0.55128	0.138542	0.553582	0.721613	0.11307	0.0774043	0.744259	0.173971	0.117619
Cyclin A:Cdk2 Associated Events At S Phase Entry	24	15	63035	66.2801	141	0.327836	9.19586e-15	2.25308e-11	75.8865	RB1 (20.65 %) CCNA1 ( 3.27 %) WEE1 ( 2.45 %) CDC25A ( 2.25 %) CDC25B ( 1.84 %) CCNH ( 1.43 %) CDK2 ( 1.02 %) MYC ( 1.02 %) CCNA2 ( 0.82 %) FZR1 ( 0.82 %) MAX ( 0.82 %) MNAT1 ( 0.82 %) CDK7 ( 0.61 %) CDKN1A ( 0.41 %)	0.0114216	0.0455191	0.216346	0.0114216	0.28652	0.0320236	0.0332583	0.0400211	0.0400211	0.0497735	0.337854	0.0552157	0.108521	0.0618249	0.0970697	0.131545	0.118703	0.49192	0.076085	0.0400211	0.648431	0.12095	0.067198	0.0749049	0.372816	0.0534051	0.0660067	0.0772635	0.0784405	0.0624234	0.449377	0.105101	0.451481	0.614099	0.085471	0.0582256	0.637726	0.132653	0.0889662
Cyclin E Associated Events During G1/S Transition	151	14	59702	63.4574	135	0.327852	9.32939e-15	2.25308e-11	79.2593	RB1 (20.65 %) WEE1 ( 2.45 %) CDC25A ( 2.25 %) CCNH ( 1.43 %) CCNE1 ( 1.23 %) PKMYT1 ( 1.23 %) CDK2 ( 1.02 %) MYC ( 1.02 %) MAX ( 0.82 %) MNAT1 ( 0.82 %) CCNE2 ( 0.61 %) CDK7 ( 0.61 %) CDKN1A ( 0.41 %)	0.0107929	0.043055	0.205701	0.0107929	0.273064	0.0302784	0.0314469	0.0378486	0.0378486	0.0470848	0.322572	0.0522412	0.102836	0.0585055	0.0919527	0.124739	0.112519	0.472519	0.0720297	0.0378486	0.627492	0.114656	0.0636	0.0709101	0.356412	0.0505255	0.0624703	0.0731479	0.0742648	0.0590729	0.43089	0.0995845	0.432945	0.593218	0.0809378	0.0550937	0.616786	0.125794	0.0842562
RAF/MAP Kinase Cascade	114	116	756250	287.101	364	0.103067	9.34346e-15	2.25308e-11	35.4396	KIT (22.90 %) ERBB4 (11.45 %) FGFR2 (10.84 %) PDGFRA (10.43 %) GRIN2A (10.02 %) JAK2 ( 9.82 %) SPTA1 ( 9.82 %) RET ( 7.57 %) ERBB2 ( 7.36 %) NRG1 ( 6.13 %) ERBB3 ( 5.93 %) GRIN2B ( 5.93 %) SPTB ( 5.93 %) TEK ( 5.93 %) JAK3 ( 5.73 %) SPTAN1 ( 5.52 %) RAPGEF2 ( 5.32 %) SPTBN1 ( 5.11 %) FGFR3 ( 4.70 %) RASGRF2 ( 4.70 %) IRS1 ( 4.50 %) RASGRF1 ( 4.50 %) JAK1 ( 4.09 %) PDGFRB ( 4.09 %) PTK2 ( 4.09 %) …	0.123617	0.414412	0.939209	0.123617	0.979306	0.31193	0.321944	0.374474	0.374474	0.443703	0.991223	0.479221	0.732737	0.519567	0.690534	0.802117	0.765775	0.999581	0.597074	0.374474	0.999994	0.772543	0.550241	0.591123	0.995293	0.467641	0.543598	0.602939	0.608718	0.523076	0.998945	0.720719	0.99899	0.999982	0.641667	0.497964	0.999991	0.804997	0.657087
PI3K Events In ERBB2 Signaling	100	16	123605	89.3115	151	0.228069	9.74089e-15	2.25308e-11	70.8609	ERBB4 (11.45 %) ERBB2 ( 7.36 %) NRG1 ( 6.13 %) ERBB3 ( 5.93 %) GAB1 ( 3.27 %) NRG3 ( 3.27 %) GRB2 ( 2.25 %) NRG2 ( 1.64 %) EGF ( 1.23 %) BTC ( 0.61 %) EREG ( 0.61 %) NRG4 ( 0.41 %) HBEGF ( 0.20 %)	0.0171078	0.0675894	0.306641	0.0171078	0.397779	0.0477156	0.0495397	0.0595098	0.0595098	0.0738255	0.461675	0.0817821	0.158491	0.091414	0.142201	0.190925	0.172887	0.638371	0.11208	0.0595098	0.792013	0.176053	0.0992195	0.110376	0.503801	0.0791375	0.0974908	0.113781	0.115478	0.0922846	0.591942	0.153637	0.594282	0.760767	0.125595	0.0861728	0.782428	0.192475	0.13061
Signaling By PDGF	293	27	189830	144.991	234	0.207876	1.01262e-14	2.25308e-11	52.1368	COL6A3 (12.27 %) PDGFRA (10.43 %) COL6A6 (10.22 %) COL6A5 ( 7.36 %) COL4A5 ( 6.34 %) PLG ( 5.32 %) THBS2 ( 5.32 %) COL4A4 ( 5.11 %) COL4A1 ( 4.70 %) PDGFRB ( 4.09 %) COL6A2 ( 3.48 %) COL4A2 ( 3.27 %) FURIN ( 3.07 %) THBS1 ( 3.07 %) COL4A3 ( 2.86 %) COL6A1 ( 2.86 %) COL9A1 ( 2.45 %) PDGFD ( 2.25 %) PLAT ( 2.25 %) PDGFC ( 2.04 %) COL9A2 ( 1.64 %) THBS3 ( 1.64 %) THBS4 ( 1.43 %) COL9A3 ( 1.02 %) SPP…	0.0355612	0.136574	0.536261	0.0355612	0.654976	0.0975048	0.101128	0.1208	0.1208	0.148647	0.727331	0.163922	0.30378	0.182219	0.275198	0.358897	0.328538	0.881674	0.220762	0.1208	0.962932	0.333919	0.196891	0.217621	0.770186	0.158861	0.193654	0.223891	0.227007	0.183862	0.84754	0.295326	0.849369	0.950278	0.245443	0.172289	0.959257	0.361471	0.254496
Constitutive Signaling By Aberrant PI3K In Cancer	19	61	347099	190.108	285	0.175846	1.11466e-14	2.33423e-11	45.9649	KIT (22.90 %) ERBB4 (11.45 %) FGFR2 (10.84 %) PDGFRA (10.43 %) ERBB2 ( 7.36 %) NRG1 ( 6.13 %) ERBB3 ( 5.93 %) FGFR3 ( 4.70 %) IRS1 ( 4.50 %) VAV1 ( 4.29 %) PDGFRB ( 4.09 %) FGFR1 ( 3.89 %) FYN ( 3.48 %) GAB1 ( 3.27 %) NRG3 ( 3.27 %) KL ( 2.66 %) FGFR4 ( 2.25 %) GRB2 ( 2.25 %) PIK3CD ( 2.25 %) CD19 ( 1.84 %) LCK ( 1.84 %) KLB ( 1.64 %) NRG2 ( 1.64 %) FGF23 ( 1.43 %) FGF5 ( 1.43 %) CD80 ( 1.23 %) E…	0.0562848	0.209383	0.707538	0.0562848	0.817777	0.151375	0.156819	0.186148	0.186148	0.226995	0.874954	0.249065	0.439714	0.275184	0.402464	0.508976	0.47125	0.967114	0.329062	0.186148	0.994865	0.478013	0.295878	0.32473	0.904882	0.241779	0.291331	0.333367	0.337644	0.277513	0.950668	0.42879	0.951612	0.991785	0.362737	0.261052	0.994027	0.512126	0.374925
Wnt Signaling Pathway	302	250	1698044	392.768	448	0.0571424	1.21476e-14	2.40252e-11	14.2857	CDH1 (17.59 %) FAT3 (11.45 %) FAT2 (11.25 %) EP400 ( 9.41 %) SRCAP ( 9.41 %) EP300 ( 9.20 %) PCDH15 ( 9.00 %) PCDH9 ( 9.00 %) CDH10 ( 8.59 %) ITPR1 ( 8.18 %) PCDH10 ( 7.77 %) CDH8 ( 7.57 %) CDH18 ( 7.36 %) FAT1 ( 7.36 %) DCHS1 ( 7.16 %) ITPR3 ( 6.95 %) SMARCA4 ( 6.95 %) BCL9 ( 6.54 %) CDH11 ( 6.54 %) CDH9 ( 6.54 %) CDH2 ( 6.34 %) PCDHA2 ( 6.34 %) PCDHA7 ( 6.34 %) ITPR2 ( 6.13 %) PCDH11X ( 6.13 %)…	0.267314	0.716752	0.998641	0.267314	0.999893	0.585746	0.599818	0.669092	0.669092	0.749023	0.999986	0.785171	0.955416	0.822359	0.93701	0.978047	0.967334	1	0.882664	0.669092	1	0.969516	0.847945	0.878538	0.999997	0.773741	0.842598	0.886649	0.8905	0.825402	1	0.950546	1	1	0.911006	0.802953	1	0.978793	0.919771
PI5P// PP2A And IER3 Regulate PI3K/AKT Signaling	103	83	493126	230.031	303	0.119656	1.58728e-14	2.97407e-11	45.2145	KIT (22.90 %) ERBB4 (11.45 %) FGFR2 (10.84 %) PDGFRA (10.43 %) ERBB2 ( 7.36 %) NRG1 ( 6.13 %) ERBB3 ( 5.93 %) FGFR3 ( 4.70 %) IRS1 ( 4.50 %) INSR ( 4.29 %) VAV1 ( 4.29 %) PDGFRB ( 4.09 %) FGFR1 ( 3.89 %) FYN ( 3.48 %) GAB1 ( 3.27 %) NRG3 ( 3.27 %) KL ( 2.66 %) PIP5K1C ( 2.66 %) AKT1 ( 2.25 %) FGFR4 ( 2.25 %) GRB2 ( 2.25 %) PIK3CD ( 2.25 %) PPP2R5A ( 2.04 %) CD19 ( 1.84 %) LCK ( 1.84 %) KLB ( 1.64…	0.0796876	0.285935	0.828357	0.0796876	0.912884	0.209655	0.216914	0.255663	0.255663	0.308627	0.949222	0.336746	0.564134	0.369565	0.522003	0.639251	0.598867	0.992515	0.435643	0.255663	0.999477	0.606202	0.395205	0.430411	0.965694	0.327502	0.389599	0.440826	0.445962	0.372467	0.986614	0.551901	0.98698	0.998975	0.4758	0.35187	0.999351	0.642564	0.490112
ERBB2 Regulates Cell Motility	36	15	103476	89.3456	148	0.219189	3.06725e-14	5.45971e-11	69.5946	ERBB4 (11.45 %) ERBB2 ( 7.36 %) NRG1 ( 6.13 %) ERBB3 ( 5.93 %) NRG3 ( 3.27 %) RHOA ( 2.45 %) NRG2 ( 1.64 %) DIAPH1 ( 1.23 %) EGF ( 1.23 %) MEMO1 ( 1.23 %) BTC ( 0.61 %) EREG ( 0.61 %) NRG4 ( 0.41 %) HBEGF ( 0.20 %)	0.017117	0.0676248	0.306778	0.017117	0.397944	0.0477408	0.0495658	0.0595411	0.0595411	0.073864	0.461856	0.0818245	0.15857	0.0914612	0.142272	0.191018	0.172972	0.63857	0.112137	0.0595411	0.79219	0.176139	0.0992705	0.110432	0.50399	0.0791786	0.0975409	0.113839	0.115537	0.0923322	0.59214	0.153713	0.59448	0.760952	0.125659	0.0862174	0.782607	0.192568	0.130676
Regulation Of RAC1 Activity	260	39	337789	195.712	264	0.129987	1.5421e-13	2.55728e-10	55.303	DOCK2 (8.18 %) PREX2 (8.18 %) KALRN (7.57 %) TIAM1 (6.95 %) MCF2 (6.75 %) DOCK1 (5.52 %) VAV3 (5.52 %) ARHGAP32 (5.32 %) PREX1 (5.32 %) ELMO1 (5.11 %) RASGRF2 (4.70 %) TIAM2 (4.70 %) ARHGEF7 (4.50 %) RASGRF1 (4.50 %) VAV1 (4.29 %) VAV2 (3.89 %) DOCK6 (3.68 %) NGEF (3.48 %) ARHGEF25 (3.27 %) ABR (3.07 %) SOS1 (3.07 %) ARHGEF6 (2.86 %) SPATA13 (2.66 %) BCR (2.25 %) ARHGAP9 (2.04 %) CHN2 (2.04 %) RA…	0.0592644	0.219458	0.726522	0.0592644	0.833949	0.158944	0.164634	0.195247	0.195247	0.237784	0.88837	0.260715	0.457155	0.287807	0.419027	0.527675	0.489327	0.972706	0.343521	0.195247	0.996149	0.496213	0.309233	0.339049	0.916346	0.253149	0.304528	0.347962	0.352373	0.29022	0.958141	0.445987	0.958985	0.993679	0.37822	0.273155	0.995483	0.530871	0.390754
Meiotic Synapsis	321	76	311144	179.717	247	0.138108	1.58034e-13	2.55728e-10	51.8219	SYNE1 (28.83 %) ATR ( 9.41 %) SYNE2 ( 9.20 %) BRCA1 ( 6.34 %) SYCP2 ( 5.73 %) DIDO1 ( 5.32 %) STAG1 ( 5.32 %) SYCP1 ( 4.91 %) SMC1B ( 4.50 %) STAG3 ( 3.07 %) SMC3 ( 2.45 %) HSPA2 ( 1.84 %) LMNB1 ( 1.84 %) TERF1 ( 1.43 %) HIST2H2AC ( 1.23 %) POT1 ( 1.23 %) SUN2 ( 1.23 %) FKBP6 ( 1.02 %) HIST1H2BA ( 1.02 %) HIST1H4L ( 1.02 %) SUN1 ( 1.02 %) SYCE1 ( 1.02 %) ACD ( 0.82 %) HIST1H2BD ( 0.82 %) HIST1H2B…	0.0510065	0.191296	0.670788	0.0510065	0.78532	0.137857	0.142858	0.169847	0.169847	0.207594	0.847242	0.228067	0.407576	0.252373	0.372093	0.474173	0.437794	0.954313	0.302781	0.169847	0.99147	0.444296	0.27169	0.298714	0.880701	0.221302	0.267441	0.306825	0.310846	0.254545	0.93409	0.397147	0.93523	0.986957	0.334484	0.239212	0.99022	0.477222	0.345997
Degradation Of The Extracellular Matrix	244	72	425700	224.161	293	0.116307	2.1696e-13	3.35816e-10	45.7338	CDH1 (17.59 %) LAMA3 ( 7.36 %) ADAMTS16 ( 6.95 %) ADAMTS18 ( 6.95 %) ACAN ( 6.13 %) TLL1 ( 5.73 %) ADAMTS9 ( 5.52 %) A2M ( 5.32 %) PLG ( 5.32 %) LAMA5 ( 5.11 %) NID1 ( 5.11 %) ADAMTS5 ( 4.91 %) HSPG2 ( 4.70 %) LAMC1 ( 4.70 %) LAMB1 ( 3.89 %) ADAMTS4 ( 3.68 %) BMP1 ( 3.68 %) ADAMTS1 ( 3.48 %) MMP9 ( 3.48 %) CAPN6 ( 3.07 %) MMP2 ( 3.07 %) TLL2 ( 3.07 %) ADAM15 ( 2.86 %) LAMC2 ( 2.86 %) CAPN5 ( 2.66…	0.0759152	0.27399	0.81279	0.0759152	0.901755	0.200442	0.207425	0.244757	0.244757	0.295942	0.941192	0.323194	0.545935	0.355073	0.504303	0.62067	0.580405	0.990474	0.419513	0.244757	0.999242	0.587702	0.380036	0.414398	0.959494	0.314229	0.374574	0.424583	0.429608	0.357896	0.983445	0.533826	0.983875	0.998562	0.458854	0.337876	0.999068	0.623983	0.47291
ErbB2/ErbB3 Signaling Events	37	41	294955	171.336	236	0.139062	7.19663e-13	1.0675e-09	54.661	NF2 (13.70 %) JAK2 ( 9.82 %) MTOR ( 7.98 %) ERBB2 ( 7.36 %) NRG1 ( 6.13 %) ERBB3 ( 5.93 %) DOCK7 ( 3.89 %) MAPK10 ( 3.48 %) SOS1 ( 3.07 %) USP8 ( 3.07 %) MAPK8 ( 2.86 %) MAPK9 ( 2.66 %) RAF1 ( 2.66 %) NFATC4 ( 2.45 %) SHC1 ( 2.45 %) AKT1 ( 2.25 %) GRB2 ( 2.25 %) PPP3CB ( 2.04 %) STAT3 ( 2.04 %) CHRNA1 ( 1.84 %) NRG2 ( 1.64 %) CHRNE ( 1.43 %) RNF41 ( 1.23 %) FOS ( 1.02 %) PIK3CB ( 1.02 %) HRAS ( 0…	0.046976	0.177275	0.639805	0.046976	0.756844	0.127442	0.132094	0.157243	0.157243	0.192527	0.822147	0.211721	0.381929	0.234562	0.347987	0.446087	0.410963	0.941347	0.282125	0.157243	0.987456	0.417228	0.252756	0.278277	0.858295	0.205374	0.248751	0.285953	0.28976	0.236605	0.917859	0.371936	0.919166	0.981467	0.312181	0.222186	0.985776	0.44904	0.323124
IL 6 Type Cytokine Receptor Ligand Interactions	226	20	82690	82.567	136	0.216733	8.75068e-13	1.2461e-09	76.4706	JAK2 (9.82 %) LIFR (6.34 %) OSMR (4.50 %) JAK1 (4.09 %) IL12RB2 (3.89 %) IL6ST (2.04 %) CNTFR (1.84 %) IL11 (1.23 %) IL27RA (1.23 %) TYK2 (1.02 %) OSM (0.82 %) CNTF (0.61 %) CRLF1 (0.61 %) EBI3 (0.61 %) IL11RA (0.61 %) CLCF1 (0.41 %) IL12A (0.41 %) IL27 (0.41 %) LIF (0.20 %)	0.0153364	0.0607555	0.279633	0.0153364	0.365052	0.0428449	0.0444871	0.0534693	0.0534693	0.0663838	0.425739	0.0735706	0.143201	0.0822794	0.128361	0.172839	0.156341	0.597878	0.100997	0.0534693	0.754982	0.159234	0.0893439	0.0994522	0.466157	0.0711812	0.0877787	0.10254	0.10408	0.0830671	0.551933	0.138776	0.554235	0.722259	0.113263	0.0775394	0.744892	0.174258	0.11782
Integrins In Angiogenesis	275	66	566170	248.191	314	0.102143	2.27323e-12	3.11258e-09	40.4459	COL6A3 (12.27 %) COL11A1 (10.63 %) COL6A6 (10.22 %) CBL ( 7.98 %) COL7A1 ( 7.98 %) COL5A1 ( 7.36 %) COL6A5 ( 7.36 %) COL3A1 ( 6.54 %) KDR ( 6.54 %) COL4A5 ( 6.34 %) ROCK1 ( 5.52 %) VAV3 ( 5.52 %) COL1A2 ( 5.32 %) PI4KA ( 5.32 %) COL4A4 ( 5.11 %) COL4A1 ( 4.70 %) COL5A2 ( 4.70 %) PIK3C2A ( 4.70 %) COL4A6 ( 4.50 %) IRS1 ( 4.50 %) IGF1R ( 4.29 %) TLN1 ( 4.29 %) PTK2 ( 4.09 %) COL2A1 ( 3.89 %) COL1A1…	0.0921612	0.324381	0.871515	0.0921612	0.941666	0.23963	0.247755	0.290916	0.290916	0.349313	0.968884	0.380022	0.619734	0.415593	0.576606	0.694901	0.65478	0.996652	0.48628	0.290916	0.999849	0.662118	0.443174	0.480731	0.98029	0.36995	0.43716	0.491769	0.4972	0.418724	0.993411	0.607279	0.99362	0.999669	0.528587	0.396451	0.999806	0.698161	0.543539
Hypoxia Response Via HIF Activation	273	16	123081	93.1304	147	0.198226	2.84248e-12	3.74787e-09	76.1905	VHL (15.95 %) MTOR ( 7.98 %) PARK2 ( 2.66 %) GPR37 ( 2.45 %) HIF1A ( 2.45 %) AKT1 ( 2.25 %) AKT3 ( 1.84 %) AKT2 ( 1.64 %) ARNT ( 1.43 %) EGLN2 ( 1.43 %) EGLN1 ( 1.02 %) EGLN3 ( 0.61 %) TXN ( 0.20 %) TXN2 ( 0.20 %)	0.0181517	0.0715991	0.322102	0.0181517	0.416295	0.0505784	0.0525089	0.0630566	0.0630566	0.0781893	0.481818	0.0865939	0.167386	0.0967621	0.150265	0.201412	0.182499	0.660327	0.118556	0.0630566	0.811184	0.18582	0.104997	0.11676	0.524759	0.0838009	0.103174	0.120348	0.122137	0.0976808	0.613855	0.162286	0.616206	0.780937	0.132793	0.0912299	0.801933	0.203036	0.138072
Meiotic Recombination	320	85	252206	150.819	211	0.145825	5.67464e-12	7.21491e-09	49.2891	BRCA2 (12.68 %) MLH1 (11.25 %) TEX15 ( 7.57 %) PRDM9 ( 6.75 %) BRCA1 ( 6.34 %) BLM ( 4.91 %) RAD50 ( 4.70 %) MLH3 ( 4.50 %) TOP3A ( 3.68 %) MSH4 ( 3.27 %) MRE11A ( 2.86 %) RBBP8 ( 2.86 %) NBN ( 2.25 %) RPA1 ( 2.04 %) MSH5 ( 1.64 %) DMC1 ( 1.23 %) HIST2H2AC ( 1.23 %) CDK2 ( 1.02 %) HIST1H2BA ( 1.02 %) HIST1H3B ( 1.02 %) HIST1H3D ( 1.02 %) HIST1H4L ( 1.02 %) MND1 ( 1.02 %) CDK4 ( 0.82 %) HIST1H2BD …	0.0379274	0.145133	0.559817	0.0379274	0.679005	0.103764	0.107606	0.128445	0.128445	0.157891	0.75034	0.174015	0.320673	0.193303	0.290852	0.377943	0.346438	0.897624	0.233838	0.128445	0.970357	0.35203	0.208749	0.230539	0.792005	0.168675	0.205342	0.237122	0.240392	0.195034	0.865803	0.311861	0.867522	0.959438	0.259723	0.182839	0.967208	0.38061	0.269202
Posttranslational Regulation Of Adherens Junction Stability And Dissassembly	259	50	360746	196.469	259	0.120007	1.14795e-11	1.40921e-08	44.4015	CDH1 (17.59 %) MET (10.02 %) RET ( 7.57 %) ROBO1 ( 7.57 %) TIAM1 ( 6.95 %) ABL1 ( 6.34 %) CDH2 ( 6.34 %) DSP ( 5.52 %) IQGAP1 ( 5.52 %) SLIT1 ( 5.11 %) CTNNA1 ( 4.91 %) NTRK2 ( 4.70 %) IGF1R ( 4.29 %) CTNND1 ( 3.89 %) FER ( 3.68 %) FYN ( 3.48 %) DNM2 ( 3.27 %) GFRA1 ( 3.27 %) ZBTB33 ( 3.27 %) HGS ( 2.45 %) MMP7 ( 2.04 %) JUP ( 1.84 %) MEP1B ( 1.84 %) PTPN1 ( 1.84 %) RIN2 ( 1.84 %) SNX1 ( 1.84 %) …	0.0596742	0.220836	0.729039	0.0596742	0.836062	0.159982	0.165705	0.196493	0.196493	0.239258	0.890102	0.262306	0.459515	0.289529	0.421272	0.530195	0.491768	0.973398	0.345488	0.196493	0.996299	0.49867	0.311053	0.340998	0.917813	0.254702	0.306327	0.349947	0.354376	0.291953	0.959078	0.448315	0.959909	0.993904	0.380323	0.274807	0.995654	0.533396	0.392903
PTK6 Promotes HIF1A Stabilization	290	6	43498	38.403	78	0.307729	2.25482e-11	2.61855e-08	88.4615	LRRK2 (12.47 %) GPNMB ( 2.45 %) HIF1A ( 2.45 %) PTK6 ( 0.61 %) HBEGF ( 0.20 %)	0.00580782	0.0233458	0.116279	0.00580782	0.157333	0.016368	0.0170044	0.0204972	0.0204972	0.0255556	0.18864	0.0283894	0.0565836	0.0318417	0.050458	0.0690176	0.0620627	0.290601	0.0393316	0.0204972	0.411426	0.063276	0.0346573	0.0387097	0.210653	0.0274457	0.0340323	0.0399532	0.0405743	0.032155	0.261078	0.0547501	0.262512	0.382951	0.0442927	0.0299601	0.402406	0.06962	0.0461465
EPH Ephrin Mediated Repulsion Of Cells	247	48	291890	185.05	246	0.123647	2.2802e-11	2.61855e-08	47.561	EPHA3 (12.88 %) EPHA7 ( 8.59 %) EPHB1 ( 8.59 %) EPHA5 ( 7.57 %) TIAM1 ( 6.95 %) VAV3 ( 5.52 %) EPHA4 ( 5.11 %) EPHA6 ( 4.91 %) CLTCL1 ( 4.09 %) VAV2 ( 3.89 %) EPHA8 ( 3.68 %) CLTC ( 3.48 %) FYN ( 3.48 %) MMP9 ( 3.48 %) DNM1 ( 3.07 %) EPHB2 ( 3.07 %) MMP2 ( 3.07 %) EPHB6 ( 2.86 %) AP2A2 ( 2.66 %) EPHA10 ( 2.66 %) EPHB4 ( 2.66 %) EPHB3 ( 2.45 %) AP2B1 ( 2.25 %) EFNB3 ( 2.25 %) EPHA1 ( 2.04 %) EPHA2…	0.0536759	0.200482	0.689892	0.0536759	0.802376	0.144711	0.149938	0.17812	0.17812	0.217453	0.86193	0.238744	0.424031	0.263982	0.38762	0.492048	0.454947	0.961302	0.316181	0.17812	0.993399	0.461589	0.284008	0.311976	0.893597	0.231712	0.279605	0.32036	0.324513	0.266235	0.943062	0.413341	0.944099	0.989673	0.348906	0.250322	0.992376	0.495152	0.36077
PIP3 Activates AKT Signaling	104	81	563668	248.549	309	0.0945465	1.05908e-10	1.17822e-07	40.1294	KIT (22.90 %) ERBB4 (11.45 %) FGFR2 (10.84 %) PDGFRA (10.43 %) MTOR ( 7.98 %) ERBB2 ( 7.36 %) NRG1 ( 6.13 %) ERBB3 ( 5.93 %) FGFR3 ( 4.70 %) IRS1 ( 4.50 %) RICTOR ( 4.50 %) VAV1 ( 4.29 %) PDGFRB ( 4.09 %) TNRC6C ( 4.09 %) FGFR1 ( 3.89 %) AGO1 ( 3.48 %) FYN ( 3.48 %) TNRC6A ( 3.48 %) TNRC6B ( 3.48 %) GAB1 ( 3.27 %) NRG3 ( 3.27 %) MOV10 ( 3.07 %) KL ( 2.66 %) AGO3 ( 2.45 %) AKT1 ( 2.25 %) FGFR4 ( 2…	0.0924197	0.325161	0.872289	0.0924197	0.942152	0.240244	0.248386	0.291634	0.291634	0.350136	0.969201	0.380894	0.620816	0.416517	0.577677	0.695966	0.65586	0.996707	0.487286	0.291634	0.999853	0.663196	0.444133	0.481732	0.980517	0.370807	0.438112	0.492781	0.498217	0.419652	0.993508	0.608358	0.993715	0.999677	0.52963	0.397348	0.999811	0.699224	0.544592
PDGF Receptor Signaling Network	283	6	34640	42.6758	82	0.283632	1.09339e-10	1.17954e-07	86.5854	PDGFRA (10.43 %) PDGFRB ( 4.09 %) PDGFD ( 2.25 %) PDGFC ( 2.04 %) PDGFA ( 0.61 %) PDGFB ( 0.41 %)	0.00658559	0.0264407	0.130836	0.00658559	0.176493	0.0185467	0.019267	0.0232191	0.0232191	0.0289391	0.211112	0.0321419	0.0639381	0.0360421	0.0570407	0.0779205	0.0701026	0.322583	0.0444971	0.0232191	0.451885	0.071467	0.0392214	0.0437953	0.235347	0.0310755	0.0385158	0.0451983	0.045899	0.0363958	0.290515	0.0618742	0.292076	0.421709	0.0500925	0.0339166	0.442347	0.0785972	0.0521823
IRF3 Mediated Induction Of Type I IFN	198	13	71308	75.2241	121	0.206429	2.11793e-10	2.21759e-07	66.1157	PRKDC (14.11 %) NLRP4 ( 6.34 %) MRE11A ( 2.86 %) IFI16 ( 2.66 %) XRCC5 ( 2.66 %) ZBP1 ( 2.66 %) DTX4 ( 1.84 %) TBK1 ( 1.84 %) DDX41 ( 1.43 %) XRCC6 ( 1.43 %) IRF3 ( 0.82 %) TMEM173 ( 0.41 %) TREX1 ( 0.41 %)	0.0135095	0.0536681	0.25073	0.0135095	0.329502	0.0378046	0.0392577	0.0472104	0.0472104	0.0586605	0.386236	0.0650406	0.127171	0.0727799	0.11388	0.153798	0.138963	0.551451	0.0894438	0.0472104	0.709962	0.141561	0.0790643	0.0880667	0.424419	0.0629187	0.0776714	0.0908189	0.0921919	0.0734802	0.506645	0.123205	0.508877	0.676132	0.100386	0.0685664	0.699476	0.155076	0.104456
P53 Pathway Feedback Loops 2	164	42	307798	161.554	216	0.126137	6.75068e-10	6.8664e-07	56.0185	RB1 (20.65 %) ATR ( 9.41 %) PIK3CG ( 6.95 %) PIK3C3 ( 5.32 %) PIK3C2A ( 4.70 %) PIK3C2B ( 4.50 %) PIK3C2G ( 4.50 %) TP63 ( 4.29 %) RBL1 ( 3.68 %) CCNA1 ( 3.27 %) AKT1 ( 2.25 %) PIK3CD ( 2.25 %) AKT3 ( 1.84 %) AKT2 ( 1.64 %) MAPK14 ( 1.64 %) CCNE1 ( 1.23 %) TP73 ( 1.23 %) CCNG1 ( 1.02 %) CDK2 ( 1.02 %) MAPK13 ( 1.02 %) MYC ( 1.02 %) PIK3CB ( 1.02 %) PIK3R3 ( 1.02 %) PIK3R5 ( 1.02 %) CCNA2 ( 0.82 %…	0.0425192	0.16156	0.602315	0.0425192	0.721109	0.115831	0.120089	0.143146	0.143146	0.175608	0.789729	0.193325	0.352409	0.214462	0.320378	0.41343	0.379944	0.922781	0.258677	0.143146	0.98082	0.385902	0.231344	0.25509	0.828734	0.187462	0.227624	0.262248	0.265801	0.216356	0.895332	0.342961	0.896837	0.972717	0.286763	0.203002	0.978516	0.416255	0.297018
PI3K Events In ERBB4 Signaling	101	10	70703	57.8749	97	0.224281	3.56034e-09	3.52078e-06	83.5052	ERBB4 (11.45 %) NRG1 ( 6.13 %) NRG3 ( 3.27 %) NRG2 ( 1.64 %) BTC ( 0.61 %) EREG ( 0.61 %) NRG4 ( 0.41 %) HBEGF ( 0.20 %)	0.00959105	0.0383308	0.184966	0.00959105	0.246654	0.0269364	0.0279778	0.0336857	0.0336857	0.0419283	0.292398	0.0465338	0.0918751	0.0521327	0.0820985	0.111593	0.100585	0.433381	0.0642347	0.0336857	0.58397	0.102509	0.0566892	0.0632321	0.323879	0.0450011	0.0556785	0.0652362	0.0662366	0.0526401	0.393837	0.0889531	0.395781	0.550144	0.0722167	0.0490828	0.573368	0.112544	0.0751924
MAPK3 (ERK1) Activation	81	10	55074	52.1493	90	0.236994	3.74249e-09	3.5945e-06	87.7778	JAK2 (9.82 %) JAK1 (4.09 %) IL6ST (2.04 %) CDK1 (1.43 %) IL6 (1.43 %) IL6R (1.43 %) TYK2 (1.02 %) MAPK3 (0.61 %)	0.00841398	0.0336872	0.164161	0.00841398	0.219893	0.0236562	0.0245724	0.0295961	0.0295961	0.0368573	0.261582	0.0409178	0.0810244	0.0458573	0.0723561	0.0985422	0.0887567	0.392289	0.0565465	0.0295961	0.536483	0.0904661	0.0498799	0.0556603	0.290466	0.0395662	0.0489875	0.0574318	0.0583163	0.0463051	0.35526	0.0784325	0.357074	0.503601	0.063606	0.0431662	0.526142	0.0993881	0.0662396
ErbB4 Signaling Events	38	35	275214	172.412	225	0.115614	3.83683e-09	3.5945e-06	59.1111	ERBB4 (11.45 %) JAK2 ( 9.82 %) ERBB2 ( 7.36 %) NCOR1 ( 6.34 %) NRG1 ( 6.13 %) GRIN2B ( 5.93 %) STAT5B ( 3.89 %) WWP1 ( 3.68 %) FYN ( 3.48 %) NRG3 ( 3.27 %) NEDD4 ( 3.07 %) LRIG1 ( 2.66 %) ADAM17 ( 2.45 %) SHC1 ( 2.45 %) WWOX ( 2.45 %) GRB2 ( 2.25 %) PRLR ( 2.04 %) DLG4 ( 1.84 %) MDM2 ( 1.84 %) STAT5A ( 1.84 %) NRG2 ( 1.64 %) CBFA2T3 ( 1.43 %) ITCH ( 1.43 %) TAB2 ( 1.43 %) PIK3CB ( 1.02 %) PRL ( 0…	0.0474823	0.179047	0.643845	0.0474823	0.760612	0.128755	0.133451	0.158833	0.158833	0.194431	0.825507	0.213789	0.385205	0.236818	0.351059	0.449689	0.414396	0.943156	0.284748	0.158833	0.988048	0.420693	0.255157	0.280872	0.861321	0.207389	0.25112	0.288604	0.292439	0.238878	0.920095	0.375154	0.92138	0.982266	0.315018	0.224342	0.986429	0.452656	0.326035
FAS Signaling Pathway	339	37	261087	166.868	219	0.118072	4.0327e-09	3.68113e-06	55.7078	ERBB4 (11.45 %) GLI3 ( 7.77 %) ERBB2 ( 7.36 %) MAP2K4 ( 6.95 %) ERBB3 ( 5.93 %) APAF1 ( 5.11 %) GLI1 ( 4.09 %) PARP4 ( 3.68 %) DAXX ( 3.48 %) MAPK10 ( 3.48 %) PARP1 ( 3.07 %) MAP3K5 ( 2.86 %) MAPK8 ( 2.86 %) MAPK9 ( 2.66 %) FAF1 ( 2.25 %) SCIN ( 2.04 %) FAS ( 1.84 %) LMNB1 ( 1.84 %) CASP10 ( 1.43 %) CASP9 ( 1.43 %) PARP2 ( 1.43 %) PARP3 ( 1.23 %) CASP3 ( 0.82 %) CYC1 ( 0.82 %) CASP6 ( 0.61 %) CAS…	0.0449074	0.170009	0.622844	0.0449074	0.740845	0.122065	0.126536	0.150721	0.150721	0.184708	0.807755	0.203224	0.368381	0.225286	0.335299	0.431143	0.396746	0.933351	0.271322	0.150721	0.984719	0.402874	0.242881	0.267593	0.845252	0.197099	0.239006	0.275033	0.278724	0.227261	0.908066	0.358633	0.909464	0.977818	0.300483	0.213329	0.982772	0.43404	0.311115
EPHA2 Forward Signaling	248	19	132176	103.485	149	0.158308	5.99738e-09	5.30686e-06	61.745	CBL (7.98 %) TIAM1 (6.95 %) VAV3 (5.52 %) ARHGAP35 (4.29 %) PTK2 (4.09 %) VAV2 (3.89 %) INPPL1 (3.07 %) PAK1 (2.66 %) RHOA (2.45 %) SHC1 (2.45 %) GRB2 (2.25 %) EPHA2 (2.04 %) BCAR1 (1.02 %) ACP1 (0.82 %) SRC (0.82 %) RAC1 (0.41 %) EFNA1 (0.20 %)	0.0211364	0.0829915	0.364516	0.0211364	0.466253	0.0587329	0.0609645	0.073144	0.073144	0.0905783	0.535453	0.100241	0.192352	0.111911	0.172952	0.230712	0.209423	0.716126	0.13685	0.073144	0.856874	0.213167	0.121346	0.134799	0.58003	0.0970313	0.119258	0.138896	0.140938	0.112964	0.670338	0.186581	0.672677	0.829795	0.153086	0.105564	0.848663	0.232536	0.159095
Ephrin B Reverse Signaling	250	26	173242	126.921	175	0.139505	6.11183e-09	5.30686e-06	57.1429	EPHB1 (8.59 %) MAP2K4 (6.95 %) TIAM1 (6.95 %) PTPN13 (5.32 %) RGS3 (4.29 %) FYN (3.48 %) HCK (3.27 %) DNM1 (3.07 %) EPHB2 (3.07 %) MAPK8 (2.86 %) EPHB4 (2.66 %) ITGB3 (2.66 %) ITGA2B (2.04 %) LYN (2.04 %) LCK (1.84 %) YES1 (1.84 %) BLK (1.64 %) MAP3K7 (1.64 %) EFNB1 (1.23 %) NCK2 (1.02 %) FGR (0.82 %) SRC (0.82 %) RAC1 (0.41 %) EFNB2 (0.20 %)	0.0287739	0.111665	0.461843	0.0287739	0.576007	0.079393	0.0823746	0.0986017	0.0986017	0.121694	0.649296	0.134422	0.253202	0.149729	0.228578	0.30125	0.27469	0.821103	0.182192	0.0986017	0.92983	0.279381	0.162051	0.179535	0.694463	0.1302	0.159328	0.184841	0.187481	0.151107	0.780537	0.245898	0.782662	0.911081	0.203143	0.141414	0.924272	0.303513	0.210861
FAS Pathway And Stress Induction Of HSP Regulation	338	5	46636	54.3316	92	0.228735	6.51174e-09	5.51948e-06	89.1304	PRKDC (14.11 %) DAXX ( 3.48 %) MAP3K7 ( 1.64 %) ARHGDIB ( 1.23 %) JUN ( 0.41 %)	0.00885609	0.0354333	0.172034	0.00885609	0.23005	0.024889	0.0258524	0.0311336	0.0311336	0.0387644	0.273307	0.0430302	0.0851136	0.0482184	0.0760261	0.103464	0.0932159	0.408055	0.0594405	0.0311336	0.554917	0.0950066	0.0524423	0.0585104	0.3032	0.0416104	0.0515052	0.0603697	0.0612979	0.0486886	0.370024	0.0823967	0.371889	0.521616	0.0668483	0.045392	0.544458	0.10435	0.0696112
Growth Hormone Signaling Pathway(JAK2 STAT5) ( Growth Hormone Signaling(JAK2 STAT5) )	64	9	43553	43.3596	77	0.249405	2.39379e-08	1.98184e-05	81.8182	JAK2 (9.82 %) STAT5B (3.89 %) GHR (1.84 %) STAT5A (1.84 %) GH1 (1.02 %) SOCS3 (0.82 %) SOCS2 (0.41 %)	0.00671273	0.0269459	0.133193	0.00671273	0.179585	0.0189026	0.0196365	0.0236635	0.0236635	0.0294913	0.214728	0.0327542	0.0651354	0.0367272	0.0581129	0.0793683	0.0714109	0.327674	0.0453392	0.0236635	0.458232	0.0727997	0.0399658	0.0446244	0.239311	0.0316678	0.039247	0.0460533	0.046767	0.0370876	0.295216	0.0630342	0.296797	0.427811	0.0510376	0.0345621	0.44862	0.080057	0.0531658
BARD1 Signaling Events	308	29	200354	135.735	181	0.124986	6.45801e-08	5.22512e-05	56.9061	PRKDC (14.11 %) ATR ( 9.41 %) FANCD2 ( 7.77 %) BRCA1 ( 6.34 %) RAD50 ( 4.70 %) TOPBP1 ( 4.29 %) MRE11A ( 2.86 %) RBBP8 ( 2.86 %) FANCA ( 2.66 %) XRCC5 ( 2.66 %) BACH1 ( 2.25 %) BARD1 ( 2.25 %) NBN ( 2.25 %) FANCC ( 1.64 %) XRCC6 ( 1.43 %) CCNE1 ( 1.23 %) FANCL ( 1.23 %) CDK2 ( 1.02 %) CSTF1 ( 1.02 %) EWSR1 ( 1.02 %) FANCG ( 1.02 %) PCNA ( 1.02 %) UBE2L3 ( 1.02 %) FANCE ( 0.82 %) FANCF ( 0.82 %) U…	0.031983	0.123509	0.498344	0.031983	0.615305	0.0879854	0.0912734	0.109147	0.109147	0.134519	0.688573	0.148471	0.277513	0.16522	0.250942	0.329074	0.300621	0.852809	0.200627	0.109147	0.948078	0.305654	0.178678	0.197735	0.732889	0.143846	0.175706	0.203509	0.20638	0.166726	0.815201	0.269642	0.817193	0.932414	0.223394	0.156126	0.943479	0.331493	0.231763
Constitutive Signaling By EGFRvIII	21	15	110479	70.6907	107	0.180022	1.7709e-07	0.000140098	81.3084	CBL (7.98 %) PLCG1 (3.89 %) GAB1 (3.27 %) SOS1 (3.07 %) SHC1 (2.45 %) GRB2 (2.25 %) HSP90AA1 (1.84 %) EGF (1.23 %) CDC37 (0.82 %) HRAS (0.82 %)	0.0124328	0.0494722	0.233181	0.0124328	0.307658	0.0348261	0.0361668	0.0435077	0.0435077	0.0540855	0.361731	0.0599841	0.117598	0.0671435	0.105246	0.142388	0.128568	0.521661	0.0825754	0.0435077	0.679693	0.130988	0.0729606	0.0812992	0.398346	0.058022	0.0716711	0.0838498	0.0851224	0.0677917	0.477882	0.11391	0.480055	0.645483	0.0927212	0.0632452	0.669056	0.143579	0.0964969
PDGF Signaling Pathway ( PDGF Signaling Pathway )	284	15	93268	71.7151	108	0.177813	2.00922e-07	0.000155497	78.7037	PDGFRA (10.43 %) PDGFRB ( 4.09 %) SOS1 ( 3.07 %) RAF1 ( 2.66 %) SHC1 ( 2.45 %) GRB2 ( 2.25 %) HRAS ( 0.82 %) SHC3 ( 0.82 %) PDGFA ( 0.61 %) SHC2 ( 0.61 %) PDGFB ( 0.41 %)	0.0126727	0.0504085	0.237126	0.0126727	0.312585	0.0354904	0.0368562	0.0443337	0.0443337	0.0551066	0.367273	0.0611129	0.119739	0.0684021	0.107176	0.144943	0.130895	0.528464	0.0841099	0.0443337	0.686698	0.133354	0.0743238	0.0828111	0.404255	0.059115	0.0730111	0.0854069	0.086702	0.0690619	0.484431	0.115989	0.486618	0.652552	0.0944344	0.0644332	0.676089	0.146154	0.098276
FGFR2b Ligand Binding And Activation	51	10	38028	42.259	73	0.237404	2.17558e-07	0.000164789	89.0411	FGFR2 (10.84 %) FGFBP1 ( 1.43 %) FGF10 ( 1.02 %) FGF2 ( 1.02 %) FGF3 ( 1.02 %) FGF1 ( 0.61 %) FGF7 ( 0.61 %) FGF22 ( 0.20 %)	0.00650846	0.0261341	0.129403	0.00650846	0.174612	0.0183308	0.0190428	0.0229494	0.0229494	0.028604	0.208911	0.0317703	0.0632111	0.0356262	0.0563898	0.0770412	0.0693082	0.319476	0.0439859	0.0229494	0.447999	0.0706577	0.0387696	0.043292	0.232932	0.030716	0.038072	0.0446793	0.0453721	0.035976	0.287648	0.0611699	0.289197	0.417975	0.0495187	0.0335249	0.438507	0.0777106	0.0515853
Heterotrimeric GPCR Signaling Pathway (through Glutamate// G Alpha Q And PLC Beta) ( GPCR GroupI Metabotropic Glutamate Receptor Signaling Pathway )	66	18	126203	104.811	145	0.140962	2.37288e-07	0.000175989	62.069	GRM1 (6.75 %) GRM5 (6.54 %) PRKCB (5.11 %) PRKCG (4.70 %) PRKCI (4.50 %) PRKCQ (3.27 %) PRKCD (2.86 %) PRKCH (2.66 %) RAF1 (2.66 %) GNAQ (2.25 %) ARAF (2.04 %) PRKCA (1.64 %) GNB3 (1.23 %) PRKCE (1.23 %) PRKCZ (1.02 %) GNB5 (0.61 %)	0.0215351	0.0845055	0.369987	0.0215351	0.472606	0.0598188	0.0620903	0.0744858	0.0744858	0.0922236	0.542196	0.102051	0.195636	0.113919	0.175942	0.23455	0.212958	0.722863	0.139269	0.0744858	0.862083	0.216757	0.123511	0.137185	0.586922	0.0987873	0.121389	0.141349	0.143423	0.11499	0.677241	0.189778	0.679575	0.835447	0.155766	0.107465	0.854016	0.2364	0.16187
E Cadherin Signaling In Keratinocytes	245	21	167869	113.175	154	0.133772	2.7352e-07	0.00019872	62.987	CDH1 (17.59 %) CTNNA1 ( 4.91 %) CASR ( 4.09 %) CTNND1 ( 3.89 %) PLCG1 ( 3.89 %) FYN ( 3.48 %) FMN1 ( 2.45 %) RHOA ( 2.45 %) AKT1 ( 2.25 %) JUP ( 1.84 %) AKT2 ( 1.64 %) PIP5K1A ( 1.23 %) SRC ( 0.82 %) VASP ( 0.82 %) ZYX ( 0.82 %) AJUBA ( 0.41 %) RAC1 ( 0.41 %)	0.0241412	0.0943542	0.404655	0.0241412	0.512364	0.0668965	0.0694267	0.0832206	0.0832206	0.10292	0.583983	0.113815	0.216805	0.126951	0.195248	0.259209	0.235712	0.763178	0.154939	0.0832206	0.891803	0.239851	0.137553	0.152641	0.629324	0.110198	0.135208	0.15723	0.159515	0.128135	0.718995	0.210399	0.721275	0.868083	0.173097	0.11981	0.884674	0.261217	0.179806
TGF Beta Receptor Signaling Activates SMADs	178	12	103443	56.7249	90	0.200469	3.01188e-07	0.000214446	80	CBL (7.98 %) ZFYVE9 (4.09 %) SMAD3 (3.89 %) TGFBR1 (3.48 %) FURIN (3.07 %) UBE2M (0.61 %) FKBP1A (0.41 %) TGFB1 (0.41 %) NEDD8 (0.20 %)	0.00935015	0.0373818	0.180749	0.00935015	0.24125	0.0262656	0.0272815	0.0328497	0.0328497	0.0408921	0.286195	0.0453866	0.0896639	0.0508512	0.0801121	0.108936	0.0981757	0.4252	0.0626656	0.0328497	0.57466	0.100056	0.0552989	0.0616867	0.317168	0.0438908	0.0543123	0.0636435	0.0646203	0.0513464	0.386131	0.0868088	0.38805	0.540984	0.0704601	0.0478744	0.564098	0.109866	0.0733663
Integrin Signalling Pathway	73	156	1189525	347.75	390	0.049797	4.64707e-07	0.000324384	28.2051	COL6A3 (12.27 %) COL12A1 (11.66 %) COL11A1 (10.63 %) LAMA1 (10.02 %) LAMA2 ( 7.57 %) COL5A1 ( 7.36 %) LAMA3 ( 7.36 %) COL14A1 ( 6.95 %) MAP2K4 ( 6.95 %) PIK3CG ( 6.95 %) COL27A1 ( 6.75 %) COL3A1 ( 6.54 %) FLNB ( 6.54 %) LAMA4 ( 6.54 %) COL4A5 ( 6.34 %) FLNA ( 6.13 %) LAMB4 ( 6.13 %) DOCK1 ( 5.52 %) COL1A2 ( 5.32 %) PIK3C3 ( 5.32 %) COL4A4 ( 5.11 %) ELMO1 ( 5.11 %) LAMA5 ( 5.11 %) LAMC3 ( 4.91 %) …	0.191132	0.576948	0.988909	0.191132	0.998038	0.451739	0.46451	0.529614	0.529614	0.610445	0.999506	0.649646	0.880111	0.692241	0.848247	0.926049	0.903026	0.999996	0.768057	0.529614	1	0.907491	0.723211	0.762526	0.999819	0.637038	0.71661	0.77346	0.778737	0.695847	0.999984	0.871327	0.999985	1	0.807915	0.669693	1	0.927771	0.821027
Prolactin	106	105	697471	273.83	320	0.0676692	5.44366e-07	0.000372682	32.5	RB1 (20.65 %) ERBB4 (11.45 %) JAK2 ( 9.82 %) EP300 ( 9.20 %) CBL ( 7.98 %) MTOR ( 7.98 %) ERBB2 ( 7.36 %) PIK3CG ( 6.95 %) FLNA ( 6.13 %) PRKCB ( 5.11 %) RPS6KA2 ( 4.91 %) CENPJ ( 4.50 %) IRS1 ( 4.50 %) ESR1 ( 4.29 %) VAV1 ( 4.29 %) JAK1 ( 4.09 %) PTK2 ( 4.09 %) STAT5B ( 3.89 %) VAV2 ( 3.89 %) SLC12A2 ( 3.68 %) FYN ( 3.48 %) DNM2 ( 3.27 %) GSK3B ( 3.27 %) STAT1 ( 3.27 %) SOS1 ( 3.07 %) FBXW11 ( 2…	0.11208	0.382513	0.919762	0.11208	0.969607	0.285954	0.295323	0.344699	0.344699	0.410409	0.985965	0.444431	0.695393	0.483359	0.652382	0.767648	0.729533	0.999094	0.559086	0.344699	0.99998	0.736585	0.513172	0.553224	0.991994	0.433314	0.506699	0.564871	0.570581	0.48676	0.997919	0.683081	0.998	0.999947	0.603298	0.462477	0.999973	0.770696	0.61871
ATR Signaling Pathway	306	39	230819	154.908	198	0.10659	5.64985e-07	0.000379499	53.5354	BRCA2 (12.68 %) ATR ( 9.41 %) FANCD2 ( 7.77 %) CEP164 ( 6.34 %) TOPBP1 ( 4.29 %) SMARCAL1 ( 3.89 %) FBXW11 ( 2.86 %) PLK1 ( 2.86 %) MCM7 ( 2.66 %) TIMELESS ( 2.66 %) CHEK1 ( 2.45 %) CDC25A ( 2.25 %) NBN ( 2.25 %) PPP2R2B ( 2.25 %) CDC6 ( 2.04 %) RPA1 ( 2.04 %) BTRC ( 1.84 %) MDM2 ( 1.84 %) HUS1 ( 1.64 %) RAD17 ( 1.64 %) RFC4 ( 1.43 %) RFC5 ( 1.43 %) CDC25C ( 1.23 %) CDK2 ( 1.02 %) ATRIP ( 0.82 %)…	0.0396404	0.151289	0.576154	0.0396404	0.695385	0.108278	0.112277	0.13395	0.13395	0.164535	0.765808	0.181261	0.332673	0.201251	0.301998	0.391406	0.359126	0.907833	0.243186	0.13395	0.974795	0.36486	0.217242	0.239777	0.806527	0.175723	0.213716	0.24658	0.249958	0.203043	0.877668	0.323614	0.879307	0.965008	0.269913	0.190409	0.971987	0.394135	0.27969
ATF 2 Transcription Factor Network	304	59	352678	190.318	235	0.0915882	7.15179e-07	0.000471489	53.1915	RB1 (20.65 %) PDGFRA (10.43 %) EP300 ( 9.20 %) BRCA1 ( 6.34 %) ESR1 ( 4.29 %) PPARGC1A ( 4.29 %) COL24A1 ( 4.09 %) MMP2 ( 3.07 %) MAPK8 ( 2.86 %) MAPK9 ( 2.66 %) SELE ( 2.25 %) NOS2 ( 1.84 %) CUL3 ( 1.64 %) MAPK14 ( 1.64 %) PRKCA ( 1.64 %) ATF2 ( 1.43 %) DUSP1 ( 1.43 %) IL6 ( 1.43 %) TGFB2 ( 1.43 %) CSRP2 ( 1.23 %) CXCL8 ( 1.23 %) DUSP10 ( 1.23 %) H2AFY ( 1.23 %) KAT5 ( 1.23 %) PLAU ( 1.23 %) SER…	0.0563949	0.209757	0.708262	0.0563949	0.818401	0.151655	0.157109	0.186485	0.186485	0.227396	0.875477	0.249498	0.440368	0.275654	0.403084	0.509679	0.471928	0.967339	0.329602	0.186485	0.994919	0.478696	0.296375	0.325264	0.905332	0.242202	0.291823	0.333912	0.338194	0.277986	0.950966	0.429434	0.951906	0.991864	0.363316	0.261502	0.994088	0.512831	0.375516
FGF Signaling Pathway	45	15	111093	94.8792	132	0.143403	8.28184e-07	0.000536061	71.9697	FGFR2 (10.84 %) FGFR3 ( 4.70 %) FGFR1 ( 3.89 %) PLCG1 ( 3.89 %) SOS1 ( 3.07 %) SHC1 ( 2.45 %) AKT1 ( 2.25 %) FGFR4 ( 2.25 %) MAPK14 ( 1.64 %) FRS2 ( 1.02 %) FGF1 ( 0.61 %) MAPK1 ( 0.61 %) MAPK3 ( 0.61 %)	0.0186398	0.0734695	0.329219	0.0186398	0.424763	0.0519151	0.0538952	0.0647117	0.0647117	0.0802244	0.490984	0.0888369	0.171516	0.0992539	0.154013	0.206273	0.186959	0.670139	0.12157	0.0647117	0.819538	0.190351	0.107688	0.119732	0.53426	0.0859751	0.105821	0.123405	0.125236	0.100195	0.623702	0.166303	0.626055	0.789783	0.13614	0.0935868	0.81045	0.207931	0.141541
E2F Transcription Factor Network	312	77	428582	211.366	256	0.0832054	1.10028e-06	0.000699464	36.3281	RB1 (20.65 %) TRRAP (10.84 %) EP300 ( 9.20 %) BRCA1 ( 6.34 %) APAF1 ( 5.11 %) E2F7 ( 4.91 %) RBL2 ( 4.70 %) TOPBP1 ( 4.29 %) CES5A ( 3.89 %) RBL1 ( 3.68 %) SMARCA2 ( 3.48 %) CEBPA ( 3.27 %) ORC1 ( 3.27 %) CES1 ( 2.86 %) RBBP8 ( 2.86 %) KAT2B ( 2.45 %) POLA1 ( 2.45 %) CDC25A ( 2.25 %) CES3 ( 2.25 %) TFE3 ( 2.25 %) CDC6 ( 2.04 %) E2F8 ( 2.04 %) TFDP1 ( 2.04 %) XRCC1 ( 2.04 %) PTGDR ( 1.84 %) SERPIN…	0.0681013	0.24877	0.776161	0.0681013	0.874171	0.181137	0.187529	0.221805	0.221805	0.269095	0.920443	0.294422	0.506046	0.324188	0.465778	0.579355	0.539684	0.984352	0.384845	0.221805	0.998369	0.546843	0.347605	0.380006	0.94298	0.286079	0.342473	0.389647	0.394412	0.326831	0.974363	0.494295	0.974958	0.997109	0.422228	0.308111	0.998039	0.582639	0.435653
JNK Cascade ( EGF Signaling Pathway Diagram )// JNK Cascade ( PDGF Signaling Pathway )	77	4	26599	25.3	49	0.287076	1.69554e-06	0.00105897	97.9592	MAP2K4 (6.95 %) MAPK8 (2.86 %) JUN (0.41 %)	0.00359534	0.0145012	0.0735902	0.00359534	0.100444	0.0101533	0.0105493	0.0127248	0.0127248	0.0158806	0.121259	0.0176513	0.0353772	0.0198112	0.0315091	0.0432588	0.0388454	0.191284	0.0245072	0.0127248	0.279468	0.0396144	0.0215749	0.0241167	0.136079	0.0170615	0.0211832	0.0248975	0.0252877	0.0200073	0.170635	0.0342184	0.17163	0.258107	0.0276254	0.0186337	0.27266	0.0436416	0.0287921
P73 Transcription Factor Network	324	79	427589	224.342	268	0.0772239	2.1213e-06	0.00130204	45.1493	RB1 (20.65 %) BRCA2 (12.68 %) EP300 ( 9.20 %) RNF43 ( 6.95 %) ABL1 ( 6.34 %) UBE4B ( 4.70 %) FASN ( 4.50 %) TP63 ( 4.29 %) JAK1 ( 4.09 %) GATA1 ( 3.68 %) BAX ( 3.27 %) BUB1 ( 3.27 %) NTRK1 ( 2.86 %) PLK1 ( 2.86 %) NEDD4L ( 2.66 %) CHEK1 ( 2.45 %) WWOX ( 2.45 %) JAG2 ( 2.25 %) PML ( 2.25 %) CLCA2 ( 2.04 %) FAS ( 1.84 %) MDM2 ( 1.84 %) RELA ( 1.84 %) SERPINE1 ( 1.84 %) SIRT1 ( 1.84 %) AFP ( 1.64 %)…	0.0760295	0.274355	0.813281	0.0760295	0.902112	0.200722	0.207714	0.24509	0.24509	0.29633	0.941453	0.323608	0.546496	0.355517	0.504848	0.621246	0.580976	0.990543	0.420008	0.24509	0.99925	0.588275	0.380501	0.414889	0.959697	0.314635	0.375034	0.425081	0.43011	0.358342	0.983551	0.534384	0.983979	0.998576	0.459375	0.338303	0.999078	0.624559	0.473439
Gap Filling DNA Repair Synthesis And Ligation In GG NER	315	23	111946	96.6184	132	0.135514	2.67818e-06	0.00161599	60.6061	LIG1 (11.45 %) POLE ( 7.57 %) POLD1 ( 3.89 %) RFC1 ( 3.68 %) LIG3 ( 3.27 %) POLD3 ( 2.86 %) POLK ( 2.25 %) RPA1 ( 2.04 %) XRCC1 ( 2.04 %) RFC4 ( 1.43 %) RFC5 ( 1.43 %) UBC ( 1.43 %) PCNA ( 1.02 %) POLE2 ( 0.82 %) RPA3 ( 0.82 %) UBA52 ( 0.61 %) POLD2 ( 0.41 %) RFC2 ( 0.41 %) RPA2 ( 0.20 %)	0.0191316	0.0753512	0.336317	0.0191316	0.433176	0.0532607	0.0552906	0.0663772	0.0663772	0.0822713	0.50006	0.0910925	0.175658	0.101759	0.157774	0.211143	0.191429	0.679743	0.124599	0.0663772	0.827585	0.194893	0.110393	0.122718	0.543646	0.0881615	0.108481	0.126476	0.128348	0.102722	0.633374	0.170333	0.635727	0.798339	0.139502	0.0959565	0.818665	0.212834	0.145025
Presynaptic Phase Of Homologous DNA Pairing And Strand Exchange	325	39	234446	151.2	191	0.101483	2.96426e-06	0.00175879	56.5445	BRCA2 (12.68 %) ATR ( 9.41 %) BRCA1 ( 6.34 %) BLM ( 4.91 %) RAD50 ( 4.70 %) TOPBP1 ( 4.29 %) TOP3A ( 3.68 %) WRN ( 3.48 %) BRIP1 ( 3.27 %) MRE11A ( 2.86 %) RBBP8 ( 2.86 %) CHEK1 ( 2.45 %) BARD1 ( 2.25 %) DNA2 ( 2.25 %) EXO1 ( 2.25 %) NBN ( 2.25 %) RPA1 ( 2.04 %) HUS1 ( 1.64 %) RAD17 ( 1.64 %) XRCC2 ( 1.64 %) RAD9B ( 1.43 %) RFC4 ( 1.43 %) RFC5 ( 1.43 %) RMI1 ( 1.43 %) KAT5 ( 1.23 %) RAD51D ( 1.23…	0.0380848	0.1457	0.561343	0.0380848	0.680546	0.10418	0.108036	0.128952	0.128952	0.158503	0.751802	0.174683	0.321784	0.194036	0.291883	0.379192	0.347614	0.898607	0.234701	0.128952	0.970796	0.353219	0.209533	0.231392	0.793383	0.169325	0.206115	0.237996	0.241276	0.195773	0.866939	0.312949	0.86865	0.959985	0.260664	0.183537	0.967679	0.381865	0.270172
Constitutive Signaling By Ligand Responsive EGFR Cancer Variants	22	19	123434	77.1432	110	0.154095	3.22646e-06	0.00188298	78.1818	CBL (7.98 %) PLCG1 (3.89 %) GAB1 (3.27 %) SOS1 (3.07 %) SHC1 (2.45 %) GRB2 (2.25 %) HSP90AA1 (1.84 %) UBC (1.43 %) EGF (1.23 %) CDC37 (0.82 %) HRAS (0.82 %) UBA52 (0.61 %)	0.013977	0.0554855	0.258229	0.013977	0.338778	0.039096	0.0405976	0.0488148	0.0488148	0.0606415	0.396589	0.0672293	0.131298	0.0752183	0.117606	0.158708	0.14344	0.56381	0.0924122	0.0488148	0.722206	0.146115	0.0817039	0.0909917	0.435392	0.0650385	0.0802666	0.0938306	0.0952467	0.0759412	0.518644	0.127213	0.520897	0.68861	0.103697	0.0708692	0.711807	0.160023	0.107892
Activation Of Matrix Metalloproteinases	241	32	118361	102.718	138	0.128231	4.06397e-06	0.0022832	65.942	PLG (5.32 %) MMP16 (4.09 %) COL18A1 (3.89 %) MMP9 (3.48 %) FURIN (3.07 %) KLKB1 (3.07 %) MMP2 (3.07 %) MMP15 (2.66 %) MMP8 (2.66 %) MMP7 (2.04 %) MMP10 (1.84 %) MMP3 (1.43 %) PRSS1 (1.43 %) CTSV (1.23 %) ELANE (1.23 %) MMP11 (1.23 %) MMP14 (1.23 %) CTSG (0.82 %) KLK2 (0.82 %) MMP1 (0.82 %) MMP25 (0.82 %) MMP17 (0.61 %) MMP24 (0.61 %) TIMP2 (0.61 %) TIMP1 (0.41 %) TPSAB1 (0.41 %) CMA1 (0.20 %) CTR…	0.0209074	0.0821214	0.361355	0.0209074	0.462572	0.058109	0.0603177	0.0723731	0.0723731	0.0896326	0.531538	0.0991996	0.190461	0.110756	0.171231	0.2285	0.207387	0.712186	0.135458	0.0723731	0.853795	0.2111	0.120101	0.133426	0.576023	0.0960218	0.118033	0.137486	0.139508	0.111799	0.666309	0.18474	0.668651	0.826463	0.151544	0.104471	0.845502	0.230309	0.157499
PDGFR Alpha Signaling Pathway	286	22	126537	97.2722	132	0.132585	4.09509e-06	0.0022832	62.8788	PDGFRA (10.43 %) JAK1 ( 4.09 %) PLCG1 ( 3.89 %) RAPGEF1 ( 3.89 %) ITGAV ( 3.27 %) SOS1 ( 3.07 %) SHC1 ( 2.45 %) GRB2 ( 2.25 %) PRRT2 ( 1.84 %) SHF ( 1.64 %) CSNK2A1 ( 1.43 %) CRKL ( 1.02 %) ELK1 ( 1.02 %) FOS ( 1.02 %) CAV3 ( 0.82 %) SHB ( 0.82 %) SRF ( 0.82 %) CAV1 ( 0.41 %) JUN ( 0.41 %)	0.0193182	0.076064	0.33899	0.0193182	0.436335	0.0537707	0.0558194	0.0670082	0.0670082	0.0830466	0.50346	0.0919467	0.177225	0.102707	0.159196	0.212983	0.193119	0.683313	0.125745	0.0670082	0.830543	0.196609	0.111417	0.123848	0.547156	0.0889897	0.109489	0.127638	0.129526	0.103679	0.636977	0.171857	0.63933	0.801493	0.140773	0.0968538	0.821688	0.214687	0.146342
PDGF Pathway	258	16	91637	81.949	115	0.147154	4.10464e-06	0.0022832	67.8261	TIAM1 (6.95 %) CHUK (4.70 %) VAV1 (4.29 %) VAV2 (3.89 %) STAT1 (3.27 %) WASL (3.27 %) PAK1 (2.66 %) RAF1 (2.66 %) RHOA (2.45 %) STAT3 (2.04 %) SRC (0.82 %) CDC42 (0.61 %) ARFIP2 (0.41 %) RAC1 (0.41 %)	0.0151786	0.060145	0.277179	0.0151786	0.362055	0.0424102	0.0440362	0.0529299	0.0529299	0.0657187	0.422427	0.0728364	0.141827	0.0814622	0.127119	0.17121	0.154853	0.594062	0.100004	0.0529299	0.751384	0.157721	0.0884599	0.0984737	0.462672	0.0704699	0.0869095	0.101533	0.103058	0.0822423	0.548188	0.137441	0.550486	0.718546	0.112158	0.0767672	0.741254	0.172617	0.116673
Leucine Stimulation On Insulin Signaling	366	15	114232	94.6605	129	0.134421	4.39345e-06	0.00240626	70.5426	MTOR (7.98 %) PIK3CG (6.95 %) IRS1 (4.50 %) INSR (4.29 %) TSC2 (3.48 %) TSC1 (2.66 %) AKT1 (2.25 %) RPS6KB1 (1.64 %) PIK3R6 (1.43 %) IRS2 (1.23 %) RHEB (1.23 %) SLC7A5 (0.82 %)	0.0185784	0.0732344	0.328327	0.0185784	0.423705	0.0517471	0.0537209	0.0645036	0.0645036	0.0799686	0.48984	0.088555	0.170997	0.0989408	0.153542	0.205663	0.186399	0.66892	0.121192	0.0645036	0.818507	0.189782	0.10735	0.119359	0.533075	0.0857018	0.105488	0.123021	0.124846	0.0998791	0.622477	0.165799	0.624829	0.78869	0.13572	0.0932906	0.809399	0.207316	0.141105
Regulation Of IFNG Signaling	204	14	65351	61.7782	92	0.172952	4.55125e-06	0.00245491	77.1739	JAK2 (9.82 %) JAK1 (4.09 %) STAT1 (3.27 %) PTPN1 (1.84 %) IFNGR1 (1.43 %) PTPN2 (1.43 %) PIAS1 (1.23 %) IFNGR2 (1.02 %) PTPN6 (0.82 %) SOCS3 (0.82 %) IFNG (0.61 %)	0.0104257	0.0416133	0.199419	0.0104257	0.265091	0.029258	0.0303877	0.036578	0.036578	0.0455115	0.313487	0.0505001	0.0994992	0.056562	0.0889517	0.120741	0.108888	0.460851	0.0696538	0.036578	0.614694	0.110961	0.0614928	0.0685698	0.346637	0.0488401	0.0603993	0.0707365	0.071818	0.0571111	0.41981	0.0963478	0.421833	0.580508	0.0782806	0.0532603	0.604005	0.121765	0.081495
Integrated Breast Cancer Pathway	71	90	641037	241.014	283	0.0697442	5.35921e-06	0.00284758	36.7491	RB1 (20.65 %) ATR ( 9.41 %) MSH2 ( 7.36 %) SMARCA4 ( 6.95 %) BRCA1 ( 6.34 %) ZMYND8 ( 5.93 %) CHEK2 ( 5.73 %) FILIP1 ( 5.52 %) AR ( 5.32 %) JAKMIP1 ( 5.11 %) BLM ( 4.91 %) HIPK2 ( 4.91 %) TPR ( 4.91 %) CHUK ( 4.70 %) JAK1 ( 4.09 %) MYT1 ( 4.09 %) FER ( 3.68 %) TGFBR1 ( 3.48 %) STAT1 ( 3.27 %) PLK1 ( 2.86 %) PAK1 ( 2.66 %) TSC1 ( 2.66 %) CHEK1 ( 2.45 %) USP15 ( 2.45 %) WEE1 ( 2.45 %) ZMIZ1 ( 2.45 …	0.0870813	0.308917	0.855362	0.0870813	0.93127	0.227513	0.235294	0.276707	0.276707	0.332974	0.961985	0.362678	0.597912	0.397193	0.555077	0.673266	0.632926	0.995347	0.466148	0.276707	0.999749	0.640284	0.424037	0.460716	0.975277	0.352927	0.418177	0.471525	0.476848	0.400236	0.991196	0.585514	0.99146	0.999475	0.507678	0.378605	0.999682	0.676557	0.522404
Inflammation Mediated By Chemokine And Cytokine Signaling Pathway	227	189	1133314	339.504	378	0.0466464	6.04749e-06	0.00316604	30.6878	COL6A3 (12.27 %) COL12A1 (11.66 %) JAK2 ( 9.82 %) MYO3A ( 9.20 %) ITPR1 ( 8.18 %) MYH11 ( 7.98 %) MYH1 ( 7.16 %) MYH3 ( 7.16 %) COL14A1 ( 6.95 %) ITPR3 ( 6.95 %) MYO3B ( 6.95 %) PIK3CG ( 6.95 %) MYH2 ( 6.54 %) MYH8 ( 6.54 %) VWF ( 6.54 %) ADCY2 ( 6.34 %) MYH9 ( 6.34 %) ITPR2 ( 6.13 %) MYLK ( 6.13 %) MYH14 ( 5.73 %) ROCK1 ( 5.52 %) ADCY5 ( 5.32 %) MYH6 ( 5.32 %) PREX1 ( 5.32 %) MYH4 ( 5.11 %) MYH7…	0.180144	0.553153	0.985232	0.180144	0.997084	0.430373	0.442807	0.506497	0.506497	0.58637	0.999198	0.625475	0.862792	0.668285	0.82891	0.912725	0.887509	0.999992	0.745464	0.506497	1	0.892367	0.699645	0.739784	0.999686	0.612869	0.692943	0.75102	0.756455	0.671925	0.999967	0.853401	0.999969	1	0.78666	0.645579	1	0.91463	0.800328
P53 Pathway	161	11	117607	78.4856	110	0.146603	8.12939e-06	0.0041943	83.6364	ATR (9.41 %) EP300 (9.20 %) KAT2B (2.45 %) AKT1 (2.25 %) MDM2 (1.84 %) MDM4 (1.23 %) CDK2 (1.02 %) PPP2CA (0.61 %)	0.0143081	0.0567713	0.263498	0.0143081	0.345273	0.0400101	0.0415461	0.0499501	0.0499501	0.0620428	0.403819	0.0687772	0.134212	0.0769425	0.120236	0.162171	0.146599	0.572361	0.09451	0.0499501	0.730569	0.149328	0.0835699	0.0930589	0.443042	0.0665378	0.0821012	0.0959587	0.0974052	0.0776812	0.52697	0.130042	0.529237	0.69716	0.106035	0.0724976	0.720237	0.163511	0.11032
MAPK1 (ERK2) Activation	80	9	60287	60.314	89	0.168972	1.06998e-05	0.00544163	88.764	JAK2 (9.82 %) JAK1 (4.09 %) IL6ST (2.04 %) IL6 (1.43 %) IL6R (1.43 %) TYK2 (1.02 %) MAPK1 (0.61 %) MAP2K2 (0.41 %)	0.0101095	0.0403707	0.193973	0.0101095	0.258158	0.0283788	0.0294752	0.0354829	0.0354829	0.0441552	0.30557	0.048999	0.0966176	0.0548859	0.0863606	0.117286	0.10575	0.450601	0.0676039	0.0354829	0.603328	0.107767	0.0596753	0.0665506	0.338104	0.0473871	0.0586131	0.0686559	0.0697068	0.0554193	0.410101	0.0935526	0.412096	0.56925	0.0759873	0.0516794	0.592663	0.118282	0.0791116
FGFR2c Ligand Binding And Activation	52	13	47547	52.1643	79	0.180253	1.56999e-05	0.00787209	82.2785	FGFR2 (10.84 %) FGF23 ( 1.43 %) FGF5 ( 1.43 %) FGF2 ( 1.02 %) FGF20 ( 1.02 %) FGF6 ( 1.02 %) FGF8 ( 0.82 %) FGF1 ( 0.61 %) FGF16 ( 0.61 %) FGF17 ( 0.61 %) FGF18 ( 0.61 %) FGF9 ( 0.20 %)	0.008417	0.0336992	0.164215	0.008417	0.219963	0.0236646	0.0245811	0.0296067	0.0296067	0.0368703	0.261663	0.0409322	0.0810525	0.0458735	0.0723812	0.0985759	0.0887873	0.392398	0.0565663	0.0296067	0.536611	0.0904972	0.0498974	0.0556798	0.290554	0.0395802	0.0490047	0.057452	0.0583368	0.0463215	0.355362	0.0784597	0.357176	0.503727	0.0636282	0.0431814	0.52627	0.0994221	0.0662627
Oxygen Dependent Proline Hydroxylation Of Hypoxia Inducible Factor Alpha	282	18	90605	86.0612	117	0.133378	1.85684e-05	0.00918105	74.359	VHL (15.95 %) HIF3A ( 3.27 %) CUL2 ( 3.07 %) HIF1A ( 2.45 %) EPAS1 ( 1.64 %) EGLN2 ( 1.43 %) UBC ( 1.43 %) EGLN1 ( 1.02 %) EGLN3 ( 0.61 %) UBA52 ( 0.61 %) RBX1 ( 0.20 %) TCEB1 ( 0.20 %) TCEB2 ( 0.20 %) UBE2D1 ( 0.20 %) UBE2D2 ( 0.20 %) UBE2D3 ( 0.20 %)	0.0162428	0.0642569	0.293575	0.0162428	0.382006	0.0453391	0.0470745	0.0565635	0.0565635	0.0701972	0.444408	0.0777794	0.151055	0.0869627	0.135467	0.182139	0.164845	0.619124	0.106683	0.0565635	0.774679	0.167878	0.0944081	0.105056	0.485754	0.0752589	0.0927589	0.108307	0.109928	0.0877929	0.572862	0.146409	0.575188	0.742671	0.119592	0.081965	0.764835	0.183625	0.124385
Integrin Signaling Pathway ( Integrin Signaling Pathway )	72	123	1080793	337.693	374	0.0443493	2.03073e-05	0.0099033	33.1551	COL12A1 (11.66 %) COL11A1 (10.63 %) VCAN ( 8.59 %) DOCK2 ( 8.18 %) TNXB ( 8.18 %) COL7A1 ( 7.98 %) COL5A1 ( 7.36 %) TNC ( 6.95 %) MCF2 ( 6.75 %) COL3A1 ( 6.54 %) COL4A5 ( 6.34 %) ACAN ( 6.13 %) DOCK5 ( 5.93 %) DOCK1 ( 5.52 %) COL1A2 ( 5.32 %) DOCK10 ( 5.32 %) DOCK3 ( 5.32 %) COL4A4 ( 5.11 %) DOCK8 ( 4.91 %) COL4A1 ( 4.70 %) COL5A2 ( 4.70 %) HSPG2 ( 4.70 %) COL4A6 ( 4.50 %) DOCK4 ( 4.50 %) ITGA10 …	0.177823	0.548001	0.984319	0.177823	0.996831	0.425792	0.43815	0.501512	0.501512	0.58114	0.999112	0.620203	0.858858	0.663034	0.824556	0.909642	0.883957	0.99999	0.740459	0.501512	1	0.888898	0.69446	0.73475	0.999648	0.607605	0.68774	0.746044	0.751509	0.66668	0.999962	0.849339	0.999964	1	0.781918	0.640308	1	0.911587	0.795697
TP53 Regulates Transcription Of Genes Involved In G2 Cell Cycle Arrest	134	18	81837	78.2108	108	0.140157	2.19999e-05	0.0105838	63.8889	EP300 (9.20 %) RBL2 (4.70 %) RBL1 (3.68 %) BAX (3.27 %) TFDP1 (2.04 %) AURKA (1.64 %) CCNB1 (1.64 %) ZNF385A (1.64 %) CDK1 (1.43 %) CDC25C (1.23 %) PCNA (1.02 %) PRMT1 (1.02 %) TFDP2 (1.02 %) CARM1 (0.41 %) E2F4 (0.41 %) SFN (0.20 %)	0.0142401	0.0565071	0.262418	0.0142401	0.343943	0.0398222	0.0413512	0.0497168	0.0497168	0.0617549	0.40234	0.0684592	0.133614	0.0765883	0.119696	0.16146	0.145951	0.570617	0.0940791	0.0497168	0.728871	0.148669	0.0831866	0.0926343	0.441478	0.0662298	0.0817244	0.0955217	0.0969619	0.0773238	0.52527	0.129462	0.527534	0.695422	0.105555	0.0721631	0.718525	0.162795	0.109821
[CGB Protein Results In Increased Activity Of LHCGR Protein]// [N (2 Cyclohexyloxy 4 Nitrophenyl)methanesulfonamide Results In Decreased Activity Of PTGS2 Protein] Inhibits The Reaction [CGB Protein Results In Increased Chemical Synthesis Of Dinoprost]// [N3 Cyclopropyl 7 ((4 (1 Methylethyl)phenyl)methyl) 7H Pyrrolo(3// 2 F)quinazoline 1//3 Diamine Binds To F2R Protein] Promotes The Reaction [CGB…	264	6	13875	13.6221	30	0.342879	2.61581e-05	0.0124164	100	LHCGR (5.32 %) STAR (0.41 %) CGB3 (0.20 %) CGB5 (0.20 %)	0.0018308	0.00740416	0.0381428	0.0018308	0.05243	0.00517856	0.0053811	0.00649429	0.00649429	0.00811127	0.0636496	0.00901966	0.0181579	0.0101288	0.0161567	0.0222475	0.0199554	0.102385	0.0125444	0.00649429	0.153593	0.0203545	0.0110353	0.0123433	0.0717173	0.00871695	0.0108339	0.0127454	0.0129464	0.0102296	0.0907971	0.017558	0.0913523	0.140919	0.0141515	0.00952396	0.149534	0.0224466	0.0147535
Homologous DNA Pairing And Strand Exchange// Resolution Of D Loop Structures Through Synthesis Dependent Strand Annealing (SDSA)	318	26	177440	126.403	160	0.102364	2.92826e-05	0.0137166	58.125	BRCA2 (12.68 %) BRCA1 ( 6.34 %) BLM ( 4.91 %) RAD50 ( 4.70 %) PALB2 ( 4.29 %) TOP3A ( 3.68 %) WRN ( 3.48 %) BRIP1 ( 3.27 %) MRE11A ( 2.86 %) RBBP8 ( 2.86 %) BARD1 ( 2.25 %) DNA2 ( 2.25 %) EXO1 ( 2.25 %) NBN ( 2.25 %) RTEL1 ( 1.84 %) XRCC2 ( 1.64 %) RAD51AP1 ( 1.43 %) RMI1 ( 1.43 %) KAT5 ( 1.23 %) RAD51D ( 1.23 %) XRCC3 ( 1.02 %) RAD51C ( 0.82 %) RAD51B ( 0.61 %) RMI2 ( 0.61 %)	0.0285911	0.110986	0.459688	0.0285911	0.573655	0.0789018	0.0818658	0.0979982	0.0979982	0.120959	0.646919	0.133616	0.251795	0.148839	0.227286	0.299633	0.273187	0.819106	0.181131	0.0979982	0.928618	0.277857	0.161095	0.178488	0.692118	0.129417	0.158387	0.183766	0.186393	0.15021	0.77838	0.244525	0.780513	0.909682	0.201975	0.140569	0.923001	0.301887	0.209655
BMP Signaling Pathway ( TGF Beta BMP Diagram(MolecularVariation) )	220	34	245283	130.248	164	0.100074	3.11192e-05	0.0143876	56.7073	EP300 (9.20 %) SMARCA4 (6.95 %) SMAD3 (3.89 %) BMPR1A (3.48 %) BMP10 (2.86 %) BMP7 (2.45 %) BMPR1B (2.25 %) GDF2 (2.25 %) MAML1 (2.25 %) BMP5 (2.04 %) GDF5 (2.04 %) MAML2 (2.04 %) BMP15 (1.84 %) BMP2 (1.84 %) GDF3 (1.84 %) BMP3 (1.64 %) BMP6 (1.64 %) GDF6 (1.64 %) GDF9 (1.64 %) SMAD1 (1.64 %) SMAD9 (1.43 %) BMP4 (1.23 %) GDF11 (1.23 %) MAML3 (1.23 %) GDF10 (1.02 %) MSTN (1.02 %) SMAD5 (0.82 %) GD…	0.0299627	0.116066	0.475651	0.0299627	0.590997	0.0825822	0.0856779	0.102519	0.102519	0.126462	0.664378	0.139648	0.262293	0.155495	0.236931	0.311679	0.284396	0.833563	0.189063	0.102519	0.937231	0.289218	0.168243	0.186318	0.709288	0.135275	0.165427	0.1918	0.194527	0.156921	0.794064	0.254774	0.796142	0.919665	0.210698	0.146888	0.932042	0.314002	0.218661
FOXA1 Transcription Factor Network	313	45	276002	168.955	205	0.0839824	3.2119e-05	0.0146594	58.0488	APOB (12.88 %) EP300 ( 9.20 %) DSCAM ( 7.98 %) BRCA1 ( 6.34 %) AR ( 5.32 %) ESR1 ( 4.29 %) COL18A1 ( 3.89 %) NCOA3 ( 3.48 %) NRIP1 ( 3.48 %) PRDM15 ( 2.66 %) VTN ( 2.66 %) NFIB ( 2.45 %) NFIA ( 2.04 %) PISD ( 1.64 %) SERPINA1 ( 1.64 %) CYP2C18 ( 1.43 %) NFIC ( 1.43 %) SP1 ( 1.43 %) FOXA2 ( 1.23 %) SFTPD ( 1.23 %) FOS ( 1.02 %) GCG ( 1.02 %) NDUFV3 ( 1.02 %) NKX3-1 ( 1.02 %) POU2F1 ( 1.02 %) AP1B1…	0.0458668	0.173385	0.630803	0.0458668	0.748388	0.124562	0.129117	0.15375	0.15375	0.188341	0.814566	0.207174	0.374698	0.229599	0.34121	0.43812	0.403378	0.937185	0.27635	0.15375	0.986055	0.409571	0.247475	0.272565	0.851441	0.200946	0.243538	0.280115	0.283861	0.231606	0.912743	0.364834	0.914098	0.979591	0.30593	0.217447	0.984236	0.441043	0.316708
Hypoxic And Oxygen Homeostasis Regulation Of HIF 1 Alpha	274	19	105546	96.4197	127	0.119638	3.92276e-05	0.0176773	77.1654	VHL (15.95 %) HIF3A ( 3.27 %) CUL2 ( 3.07 %) HIF1A ( 2.45 %) HSP90AA1 ( 1.84 %) ARNT ( 1.43 %) EGLN2 ( 1.43 %) OS9 ( 1.43 %) CDKN2A ( 1.02 %) EGLN1 ( 1.02 %) HIF1AN ( 0.82 %) EGLN3 ( 0.61 %) COPS5 ( 0.41 %) RACK1 ( 0.41 %) NAA10 ( 0.20 %) RBX1 ( 0.20 %) TCEB1 ( 0.20 %) TCEB2 ( 0.20 %)	0.0190751	0.0751351	0.335505	0.0190751	0.432215	0.0531062	0.0551303	0.0661859	0.0661859	0.0820363	0.499025	0.0908336	0.175183	0.101471	0.157343	0.210585	0.190917	0.678654	0.124251	0.0661859	0.826678	0.194372	0.110082	0.122375	0.542577	0.0879105	0.108176	0.126123	0.127991	0.102432	0.632275	0.169871	0.634628	0.797374	0.139116	0.0956845	0.817739	0.212272	0.144625
LRR FLII Interacting Protein 1 (LRRFIP1) Activates Type I IFN Production	199	5	49895	35.8098	58	0.209426	4.74728e-05	0.0211254	91.3793	EP300 (9.20 %) LRRFIP1 (2.86 %) IRF3 (0.82 %)	0.00534955	0.0215187	0.107594	0.00534955	0.145842	0.0150828	0.0156697	0.018891	0.018891	0.0235577	0.17511	0.0261729	0.0522259	0.0293599	0.0465604	0.0637352	0.0572961	0.271066	0.036277	0.018891	0.386218	0.0584191	0.0319596	0.0357025	0.195741	0.025302	0.0313825	0.0368512	0.0374251	0.0296491	0.243177	0.0505298	0.244529	0.358925	0.040861	0.0276228	0.377561	0.064293	0.0425744
PI3K Cascade	99	36	200996	135.811	169	0.0949529	4.92283e-05	0.0216361	64.497	FGFR2 (10.84 %) PIK3C3 ( 5.32 %) FGFR3 ( 4.70 %) IRS1 ( 4.50 %) FGFR1 ( 3.89 %) GAB1 ( 3.27 %) PIK3R4 ( 3.27 %) TLR9 ( 2.86 %) KL ( 2.66 %) FGFR4 ( 2.25 %) GRB2 ( 2.25 %) KLB ( 1.64 %) FGF23 ( 1.43 %) FGF5 ( 1.43 %) IRS2 ( 1.23 %) FGF10 ( 1.02 %) FGF2 ( 1.02 %) FGF20 ( 1.02 %) FGF3 ( 1.02 %) FGF6 ( 1.02 %) FRS2 ( 1.02 %) PIK3CB ( 1.02 %) FGF8 ( 0.82 %) FGF1 ( 0.61 %) FGF16 ( 0.61 %) FGF17 ( 0.61 …	0.0320112	0.123612	0.498655	0.0320112	0.615635	0.0880608	0.0913515	0.109239	0.109239	0.134631	0.688899	0.148594	0.277724	0.165355	0.251136	0.329315	0.300845	0.853062	0.200788	0.109239	0.948216	0.305882	0.178823	0.197893	0.733205	0.143965	0.175849	0.203672	0.206545	0.166862	0.815481	0.269848	0.817471	0.932577	0.22357	0.156254	0.943624	0.331735	0.231945
Collagen Degradation	243	39	201008	145.78	179	0.0891538	6.52945e-05	0.0283474	53.6313	COL12A1 (11.66 %) COL14A1 ( 6.95 %) COL18A1 ( 3.89 %) COL15A1 ( 3.48 %) COL19A1 ( 3.48 %) MMP9 ( 3.48 %) COL17A1 ( 3.07 %) FURIN ( 3.07 %) MMP2 ( 3.07 %) COL16A1 ( 2.86 %) COL25A1 ( 2.86 %) MMP15 ( 2.66 %) MMP8 ( 2.66 %) ADAM17 ( 2.45 %) COL9A1 ( 2.45 %) MMP19 ( 2.45 %) MMP7 ( 2.04 %) MMP10 ( 1.84 %) ADAM10 ( 1.64 %) ADAM9 ( 1.64 %) COL9A2 ( 1.64 %) CTSL ( 1.64 %) MMP3 ( 1.43 %) COL13A1 ( 1.23 %)…	0.0358767	0.137719	0.539469	0.0358767	0.658277	0.0983409	0.101994	0.121822	0.121822	0.149884	0.730514	0.165273	0.306054	0.183704	0.277303	0.361467	0.33095	0.883934	0.222516	0.121822	0.96402	0.33636	0.198481	0.219354	0.773219	0.160174	0.19522	0.225666	0.228803	0.185359	0.850109	0.297551	0.851923	0.951609	0.247361	0.173702	0.960418	0.364054	0.256471
HDR Through Single Strand Annealing (SSA)	317	37	210415	140.157	173	0.0914306	6.61937e-05	0.0283915	57.8035	ATR (9.41 %) ABL1 (6.34 %) BRCA1 (6.34 %) BLM (4.91 %) RAD50 (4.70 %) TOPBP1 (4.29 %) TOP3A (3.68 %) WRN (3.48 %) BRIP1 (3.27 %) ERCC4 (2.86 %) MRE11A (2.86 %) RBBP8 (2.86 %) BARD1 (2.25 %) DNA2 (2.25 %) EXO1 (2.25 %) NBN (2.25 %) RPA1 (2.04 %) HUS1 (1.64 %) RAD17 (1.64 %) RAD9B (1.43 %) RFC4 (1.43 %) RFC5 (1.43 %) RMI1 (1.43 %) KAT5 (1.23 %) RAD52 (1.02 %) ATRIP (0.82 %) RPA3 (0.82 %) ERCC1 (0.6…	0.0336655	0.12967	0.516527	0.0336655	0.634478	0.0924695	0.0959161	0.11464	0.11464	0.141184	0.707422	0.155764	0.289973	0.173249	0.262436	0.343252	0.313876	0.867154	0.210149	0.11464	0.95568	0.319078	0.187284	0.207138	0.751108	0.150932	0.184186	0.213149	0.216137	0.17482	0.831168	0.281821	0.833084	0.941489	0.23383	0.163757	0.951534	0.345746	0.242526
JAK/STAT Signaling Pathway	76	15	106359	98.3165	127	0.111177	0.000112807	0.0478086	59.8425	JAK2 (9.82 %) JAK3 (5.73 %) PTPRC (5.73 %) JAK1 (4.09 %) STAT5B (3.89 %) STAT1 (3.27 %) STAT4 (2.25 %) PIAS3 (2.04 %) STAT3 (2.04 %) STAT5A (1.84 %) PIAS1 (1.23 %) PIAS2 (1.02 %) STAT6 (0.82 %)	0.019618	0.077209	0.343265	0.019618	0.441377	0.0545901	0.0566691	0.068022	0.068022	0.0842918	0.508879	0.0933185	0.179736	0.10423	0.161479	0.215932	0.195828	0.688969	0.127584	0.068022	0.835193	0.199361	0.11306	0.125662	0.552745	0.0903195	0.111106	0.129503	0.131417	0.105216	0.642698	0.174301	0.64505	0.806461	0.142814	0.0982948	0.826442	0.217656	0.148457
FCERI Mediated MAPK Activation	44	40	193941	133.785	165	0.0910776	0.000116356	0.0487326	60	MAP2K4 (6.95 %) VAV3 (5.52 %) PLCG2 (4.50 %) VAV1 (4.29 %) PLCG1 (3.89 %) VAV2 (3.89 %) MAPK10 (3.48 %) SOS1 (3.07 %) MAPK8 (2.86 %) MAPK9 (2.66 %) PAK1 (2.66 %) SHC1 (2.45 %) GRB2 (2.25 %) LCP2 (2.25 %) MAP2K7 (2.25 %) PAK2 (2.25 %) LYN (2.04 %) SYK (1.64 %) FOS (1.02 %) GRAP2 (1.02 %) HRAS (0.82 %) LAT (0.61 %) MAPK1 (0.61 %) MAPK3 (0.61 %) JUN (0.41 %) RAC1 (0.41 %)	0.0312563	0.120837	0.490292	0.0312563	0.606727	0.0860443	0.0892634	0.106767	0.106767	0.131627	0.680072	0.145306	0.272071	0.161732	0.245929	0.322864	0.294824	0.846153	0.196484	0.106767	0.944409	0.299783	0.174937	0.193644	0.724623	0.140771	0.172021	0.199314	0.202134	0.16321	0.807856	0.264325	0.809879	0.928077	0.218848	0.152812	0.939603	0.325249	0.227073
VEGF Signaling Pathway	140	54	365703	197.905	232	0.0690312	0.000128035	0.0530007	54.3103	PIK3CG (6.95 %) KDR (6.54 %) PRKD1 (5.73 %) PIK3C3 (5.32 %) PRKCB (5.11 %) PIK3C2A (4.70 %) PRKCG (4.70 %) PIK3C2B (4.50 %) PLCG2 (4.50 %) PRKCI (4.50 %) NOS3 (4.29 %) PTK2 (4.09 %) PLCG1 (3.89 %) PRKD3 (3.68 %) PRKCQ (3.27 %) PRKCD (2.86 %) PRKD2 (2.86 %) PRKCH (2.66 %) RAF1 (2.66 %) HIF1A (2.45 %) AKT1 (2.25 %) PIK3CD (2.25 %) PLA2G4A (2.25 %) ARAF (2.04 %) ETS1 (2.04 %) MAPK14 (1.64 %) PRKCA (…	0.0604566	0.223462	0.733783	0.0604566	0.840023	0.161961	0.167747	0.198867	0.198867	0.242068	0.893336	0.265336	0.463995	0.292807	0.425538	0.534972	0.4964	0.974672	0.34923	0.198867	0.996569	0.503331	0.314517	0.344706	0.920545	0.25766	0.309751	0.353724	0.358187	0.295253	0.960809	0.452737	0.961616	0.99431	0.384322	0.277952	0.995962	0.538183	0.396988
IRF3 Mediated Activation Of Type 1 IFN	197	6	27786	35.4455	56	0.198627	0.000136885	0.0560126	82.1429	NLRP4 (6.34 %) ZBP1 (2.66 %) DTX4 (1.84 %) TBK1 (1.84 %) IRF3 (0.82 %) TMEM173 (0.41 %)	0.00528599	0.0212651	0.106383	0.00528599	0.144237	0.0149045	0.0154845	0.018668	0.018668	0.0232803	0.173216	0.0258652	0.0516201	0.0290152	0.0460187	0.0630003	0.0566332	0.268316	0.0358527	0.018668	0.382639	0.0577436	0.0315849	0.0352847	0.193652	0.0250044	0.0310145	0.0364203	0.0369876	0.0293011	0.24066	0.0499431	0.242001	0.35552	0.0403842	0.0272983	0.374036	0.063552	0.042078
Signalling To P38 Via RIT And RIN	127	5	21127	15.1275	30	0.297353	0.000178769	0.0723202	100	NTRK1 (2.86 %) RIT2 (1.64 %) NGF (1.23 %) RIT1 (0.41 %)	0.00204783	0.00827912	0.0425712	0.00204783	0.0584662	0.00579129	0.00601771	0.00726212	0.00726212	0.0090694	0.0709285	0.0100845	0.0202906	0.0113239	0.0180565	0.0248544	0.0222968	0.113817	0.0140225	0.00726212	0.170177	0.0227421	0.0123367	0.0137979	0.0798787	0.00974628	0.0121117	0.014247	0.0144715	0.0114365	0.101009	0.0196209	0.101623	0.156264	0.0158174	0.0106481	0.165724	0.0250765	0.0164897
Tie2 Signaling	294	18	103645	69.9699	95	0.132812	0.000184447	0.0737789	73.6842	TEK (5.93 %) GRB14 (3.07 %) SOS1 (3.07 %) ANGPT1 (2.45 %) ANGPT2 (2.45 %) SHC1 (2.45 %) GRB2 (2.25 %) ANGPT4 (1.84 %) PIK3CB (1.02 %) HRAS (0.82 %) DOK2 (0.61 %) PIK3R2 (0.61 %) GRB7 (0.41 %)	0.0122651	0.0488175	0.230414	0.0122651	0.304196	0.0343618	0.0356849	0.0429302	0.0429302	0.0533716	0.35783	0.0591947	0.116098	0.0662633	0.103895	0.140599	0.126939	0.516851	0.0815018	0.0429302	0.674706	0.12933	0.0720072	0.0802415	0.394184	0.0572577	0.0707338	0.0827604	0.0840173	0.0669033	0.473257	0.112455	0.47542	0.640459	0.0915224	0.0624143	0.664053	0.141776	0.0952519
BMP2 Signaling Pathway(through Smad) ( TGF Beta BMP Diagram(MolecularVariation) )	221	13	112311	75.8661	101	0.124274	0.000240332	0.0950648	73.2673	EP300 (9.20 %) ZNF423 (5.93 %) BMPR1A (3.48 %) BMPR1B (2.25 %) STAT3 (2.04 %) BMP2 (1.84 %) SMAD1 (1.64 %) BAMBI (1.02 %) SMAD7 (0.41 %) SMAD6 (0.20 %)	0.0136651	0.0542733	0.253234	0.0136651	0.332603	0.0382346	0.0397038	0.0477446	0.0477446	0.0593202	0.389701	0.0657696	0.128547	0.0735921	0.115122	0.155435	0.140455	0.555602	0.0904328	0.0477446	0.714096	0.143079	0.0799436	0.0890412	0.428094	0.0636247	0.0785359	0.0918223	0.0932097	0.0743	0.510671	0.124541	0.51291	0.680339	0.101489	0.0693334	0.703637	0.156725	0.105601
AKT(PKB) Bad Signaling ( EPO Signaling Pathway(JAK2 STAT1 STAT3 STAT5) )// AKT(PKB) Bad Signaling ( IL 7 Signaling(JAK1 JAK3 STAT5) )// Positive Regulation Of (Transcription Of SOCS By STAT Dimer) In JAK STAT Pathway ( JAK STAT Pathway And Regulation Pathway Diagram )// VEGF Signaling Pathway ( VEGF Signaling Pathway )	6	190	1270222	355.551	385	0.0345593	0.000298776	0.116884	23.8961	KIT (22.90 %) FGFR2 (10.84 %) PDGFRA (10.43 %) MET (10.02 %) JAK2 ( 9.82 %) ALK ( 7.98 %) MTOR ( 7.98 %) FLT1 ( 6.95 %) MAP2K4 ( 6.95 %) KDR ( 6.54 %) ACVR2A ( 5.73 %) JAK3 ( 5.73 %) PRKCB ( 5.11 %) CDC7 ( 4.91 %) ITK ( 4.91 %) RPS6KA2 ( 4.91 %) CHUK ( 4.70 %) FGFR3 ( 4.70 %) PRKCG ( 4.70 %) PLCG2 ( 4.50 %) PRKCI ( 4.50 %) IGF1R ( 4.29 %) INSR ( 4.29 %) PAK7 ( 4.29 %) JAK1 ( 4.09 %) PDGFRB ( 4.09…	0.202216	0.599972	0.991725	0.202216	0.998692	0.47276	0.48583	0.552134	0.552134	0.633617	0.999699	0.672752	0.895563	0.714952	0.865764	0.937573	0.916682	0.999998	0.789089	0.552134	1	0.920762	0.745398	0.783728	0.999896	0.660195	0.738926	0.794317	0.799416	0.718507	0.999992	0.887395	0.999993	1	0.827461	0.692657	1	0.939121	0.839977
DNA Damage/Telomere Stress Induced Senescence	208	64	172030	114.558	142	0.0932634	0.00035918	0.138987	64.7887	EP400 (9.41 %) RAD50 (4.70 %) CCNA1 (3.27 %) MRE11A (2.86 %) NBN (2.25 %) TERF1 (1.43 %) CCNE1 (1.23 %) HIST2H2AC (1.23 %) KAT5 (1.23 %) POT1 (1.23 %) CDK2 (1.02 %) HIST1H2BA (1.02 %) HIST1H4L (1.02 %) ACD (0.82 %) CCNA2 (0.82 %) HIST1H2BD (0.82 %) HIST1H2BL (0.82 %) HIST1H4I (0.82 %) TERF2IP (0.82 %) CCNE2 (0.61 %) HIST1H2AB (0.61 %) HIST1H2AC (0.61 %) HIST1H2BB (0.61 %) HIST1H2BC (0.61 %) HIST1…	0.0245874	0.0960327	0.410407	0.0245874	0.518875	0.068105	0.0706791	0.0847103	0.0847103	0.104742	0.590757	0.115817	0.220379	0.129166	0.198513	0.263357	0.239548	0.769478	0.157597	0.0847103	0.896214	0.243743	0.139939	0.155264	0.636146	0.11214	0.137556	0.159924	0.162245	0.13037	0.725593	0.213883	0.727861	0.872991	0.176034	0.12191	0.889243	0.265392	0.182843
PDGF Signaling Pathway (Mammal) ( PDGF Signaling Pathway )	285	29	178886	110.21	137	0.0944982	0.000420256	0.160872	63.5036	PDGFRA (10.43 %) PDGFRB ( 4.09 %) RASA1 ( 3.89 %) STAT5B ( 3.89 %) SOS1 ( 3.07 %) ARHGEF6 ( 2.86 %) PAK1 ( 2.66 %) RAF1 ( 2.66 %) SHC1 ( 2.45 %) GRB2 ( 2.25 %) PIK3CD ( 2.25 %) STAT5A ( 1.84 %) PIK3CB ( 1.02 %) HRAS ( 0.82 %) SHC3 ( 0.82 %) CDC42 ( 0.61 %) PDGFA ( 0.61 %) PIK3R2 ( 0.61 %) SHC2 ( 0.61 %) PDGFB ( 0.41 %) NCK1 ( 0.20 %)	0.0231996	0.0908051	0.392345	0.0231996	0.498346	0.0643433	0.0667805	0.0800715	0.0800715	0.0990668	0.569332	0.109579	0.209215	0.12226	0.188319	0.250385	0.227561	0.749325	0.149306	0.0800715	0.881878	0.23158	0.132502	0.147084	0.614519	0.106089	0.130236	0.151522	0.153732	0.123404	0.70456	0.203004	0.706863	0.857105	0.166871	0.115366	0.874412	0.252338	0.173365
Insulin/IGF Pathway Protein Kinase B Signaling Cascade	365	22	190830	134.917	163	0.0821194	0.000471113	0.178422	62.5767	IGF2R (9.20 %) IRS4 (6.13 %) INSRR (5.93 %) IRS1 (4.50 %) IGF1R (4.29 %) INSR (4.29 %) TSC2 (3.48 %) GSK3B (3.27 %) INPPL1 (3.07 %) TSC1 (2.66 %) MDM2 (1.84 %) FOXO1 (1.64 %) IGF2 (1.43 %) GSK3A (1.23 %) IGF1 (1.23 %) IRS2 (1.23 %) MDM4 (1.23 %) FOXO3 (0.82 %) PDPK1 (0.82 %)	0.0316772	0.122385	0.49497	0.0316772	0.611717	0.0871688	0.0904278	0.108146	0.108146	0.133303	0.685023	0.14714	0.275228	0.163754	0.248836	0.326467	0.298186	0.850043	0.198886	0.108146	0.946564	0.303189	0.177105	0.196015	0.72944	0.142553	0.174157	0.201746	0.204596	0.165248	0.812144	0.267409	0.814149	0.930621	0.221483	0.154732	0.941878	0.328872	0.229792
HIF 2 Alpha Transcription Factor Network	272	34	214648	149.384	178	0.0761172	0.000521815	0.195543	52.809	VHL (15.95 %) EP300 ( 9.20 %) FLT1 ( 6.95 %) KDR ( 6.54 %) EIF3E ( 2.45 %) ABCG2 ( 2.25 %) ETS1 ( 2.04 %) SERPINE1 ( 1.84 %) SIRT1 ( 1.84 %) EPAS1 ( 1.64 %) SLC11A2 ( 1.64 %) ARNT ( 1.43 %) EGLN2 ( 1.43 %) SLC2A1 ( 1.43 %) SP1 ( 1.43 %) MMP14 ( 1.23 %) ADORA2A ( 1.02 %) APEX1 ( 1.02 %) EGLN1 ( 1.02 %) ELK1 ( 1.02 %) VEGFA ( 1.02 %) HIF1AN ( 0.82 %) CITED2 ( 0.61 %) EGLN3 ( 0.61 %) FXN ( 0.61 %) P…	0.0373363	0.143001	0.554042	0.0373363	0.673159	0.102203	0.105991	0.12654	0.12654	0.155589	0.744776	0.171503	0.316488	0.190546	0.28697	0.373235	0.342008	0.89385	0.230589	0.12654	0.968653	0.347548	0.205801	0.227329	0.786752	0.166232	0.202436	0.233835	0.237068	0.192255	0.861453	0.307763	0.863199	0.95732	0.256178	0.180214	0.965379	0.375879	0.265553
Raf Activation Signaling (through RasGRP) ( CD4 T Cell Receptor Signaling (ERK Cascade) )// Raf Activation Signaling (through RasGRP) ( CD4 T Cell Receptor Signaling )	112	8	44759	29.6812	47	0.199617	0.000530996	0.196911	87.234	PRKCQ (3.27 %) RAF1 (2.66 %) ARAF (2.04 %) RASGRP1 (2.04 %) HRAS (0.82 %)	0.00430685	0.0173521	0.0875284	0.00430685	0.119132	0.0121546	0.0126283	0.0152292	0.0152292	0.0190001	0.143501	0.0211149	0.0422433	0.0236934	0.0376392	0.0516131	0.0463683	0.224629	0.0292958	0.0152292	0.324816	0.0472825	0.0257981	0.0288302	0.160781	0.0204105	0.0253308	0.0297612	0.0302264	0.0239275	0.200845	0.0408644	0.201994	0.30076	0.0330129	0.0222878	0.317164	0.0520678	0.0344031
Activated Point Mutants Of FGFR2// Phospholipase C Mediated Cascade; FGFR2	1	18	70533	72.0645	95	0.120002	0.000597106	0.219144	72.6316	FGFR2 (10.84 %) PLCG1 ( 3.89 %) FGF23 ( 1.43 %) FGF5 ( 1.43 %) FGF10 ( 1.02 %) FGF2 ( 1.02 %) FGF20 ( 1.02 %) FGF3 ( 1.02 %) FGF6 ( 1.02 %) FGF8 ( 0.82 %) FGF1 ( 0.61 %) FGF16 ( 0.61 %) FGF17 ( 0.61 %) FGF18 ( 0.61 %) FGF7 ( 0.61 %) FGF22 ( 0.20 %) FGF9 ( 0.20 %)	0.012755	0.0507295	0.238474	0.012755	0.314267	0.0357182	0.0370926	0.0446169	0.0446169	0.0554566	0.369163	0.0614998	0.120473	0.0688334	0.107838	0.145818	0.131691	0.530775	0.0846357	0.0446169	0.689066	0.134165	0.074791	0.0833291	0.406268	0.0594897	0.0734703	0.0859404	0.0872432	0.0694972	0.486659	0.116701	0.488851	0.654945	0.0950213	0.0648403	0.678467	0.147035	0.0988854
NGF Signaling Pathway ( NGF Signaling Pathway )	89	16	93133	69.4531	92	0.122096	0.000637022	0.231408	75	PLCG1 (3.89 %) SOS1 (3.07 %) NTRK1 (2.86 %) PRKCD (2.86 %) RAF1 (2.66 %) SHC1 (2.45 %) GRB2 (2.25 %) ARAF (2.04 %) NGF (1.23 %) HRAS (0.82 %) SHC3 (0.82 %) SHC2 (0.61 %)	0.0121455	0.0483502	0.228433	0.0121455	0.301714	0.0340303	0.035341	0.0425179	0.0425179	0.0528618	0.355033	0.0586311	0.115027	0.0656348	0.102929	0.13932	0.125775	0.513389	0.0807351	0.0425179	0.671101	0.128146	0.0713263	0.0794861	0.391197	0.0567119	0.0700645	0.0819824	0.083228	0.0662689	0.469933	0.111415	0.472088	0.636831	0.0906662	0.0618211	0.660437	0.140488	0.0943626
IFN Gamma Pathway	195	43	300138	165.463	194	0.0691007	0.00072505	0.260725	54.1237	JAK2 (9.82 %) EP300 (9.20 %) CBL (7.98 %) MTOR (7.98 %) DAPK1 (5.93 %) JAK1 (4.09 %) RAPGEF1 (3.89 %) STAT1 (3.27 %) PRKCD (2.86 %) MAP3K11 (2.45 %) AKT1 (2.25 %) CAMK2G (2.25 %) STAT3 (2.04 %) CAMK2D (1.64 %) IFNGR1 (1.43 %) PTPN2 (1.43 %) CASP1 (1.23 %) IRF1 (1.23 %) IRF9 (1.23 %) PIAS1 (1.23 %) CRKL (1.02 %) IL1B (1.02 %) CAMK2A (0.82 %) CAMK2B (0.82 %) IFNG (0.61 %) MAPK1 (0.61 %) MAPK3 (0.61…	0.0442686	0.167756	0.617455	0.0442686	0.735703	0.120401	0.124815	0.148699	0.148699	0.182282	0.803087	0.200586	0.364145	0.222403	0.331337	0.426455	0.392293	0.930672	0.267958	0.148699	0.983761	0.398377	0.239809	0.264266	0.840993	0.194531	0.235975	0.271632	0.275287	0.224356	0.904818	0.354475	0.906244	0.976555	0.296836	0.210578	0.981723	0.429333	0.307369
Resolution Of D Loop Structures Through Holliday Junction Intermediates	327	33	219945	142.841	170	0.0755958	0.000816485	0.290669	53.5294	BRCA2 (12.68 %) BRCA1 ( 6.34 %) SLX4 ( 5.52 %) BLM ( 4.91 %) RAD50 ( 4.70 %) PALB2 ( 4.29 %) TOP3A ( 3.68 %) WRN ( 3.48 %) BRIP1 ( 3.27 %) MRE11A ( 2.86 %) RBBP8 ( 2.86 %) BARD1 ( 2.25 %) DNA2 ( 2.25 %) EXO1 ( 2.25 %) NBN ( 2.25 %) GEN1 ( 2.04 %) SPIDR ( 1.84 %) EME1 ( 1.64 %) XRCC2 ( 1.64 %) RAD51AP1 ( 1.43 %) RMI1 ( 1.43 %) KAT5 ( 1.23 %) MUS81 ( 1.23 %) RAD51D ( 1.23 %) XRCC3 ( 1.02 %) RAD51C …	0.0347108	0.133482	0.527505	0.0347108	0.645921	0.0952481	0.0987926	0.11804	0.11804	0.145305	0.718568	0.16027	0.297616	0.178205	0.269497	0.351921	0.321996	0.875364	0.216016	0.11804	0.959837	0.327298	0.192593	0.212933	0.76181	0.155311	0.189418	0.219088	0.222147	0.179816	0.840397	0.289296	0.842266	0.94651	0.240253	0.16847	0.955956	0.35446	0.249147
TGF Beta Super Family Signaling Pathway(canonical) ( TGF Beta BMP Diagram(MolecularVariation) )	181	51	330075	164.05	192	0.0683262	0.000886309	0.312402	52.0833	EP300 (9.20 %) SMARCA4 (6.95 %) ACVR2A (5.73 %) INHBA (3.89 %) SMAD3 (3.89 %) BMPR1A (3.48 %) TGFBR1 (3.48 %) BMP10 (2.86 %) ACVR2B (2.66 %) BMP7 (2.45 %) BMPR1B (2.25 %) GDF2 (2.25 %) MAML1 (2.25 %) BMP5 (2.04 %) GDF5 (2.04 %) MAML2 (2.04 %) BMP15 (1.84 %) BMP2 (1.84 %) GDF3 (1.84 %) ACVR1 (1.64 %) ACVRL1 (1.64 %) BMP3 (1.64 %) BMP6 (1.64 %) GDF6 (1.64 %) GDF9 (1.64 %) SMAD1 (1.64 %) SMAD9 (1.43…	0.0436313	0.165502	0.612004	0.0436313	0.730474	0.118738	0.123095	0.146679	0.146679	0.179855	0.798319	0.197947	0.359892	0.219518	0.327363	0.421741	0.38782	0.927894	0.264589	0.146679	0.982745	0.393859	0.236734	0.260934	0.836629	0.191961	0.232941	0.268225	0.271843	0.22145	0.901464	0.350302	0.902918	0.975223	0.293181	0.207825	0.980614	0.4246	0.303614
JNK Cascade ( TGF Beta Signaling(through TAK1) )	231	6	44881	52.6973	72	0.135544	0.00129672	0.449177	83.3333	MAP2K4 (6.95 %) MAPK10 (3.48 %) MAPK8 (2.86 %) MAPK9 (2.66 %) MAP3K7 (1.64 %) JUN (0.41 %)	0.00852424	0.0341229	0.166131	0.00852424	0.222438	0.0239637	0.0248917	0.0299797	0.0299797	0.0373332	0.264524	0.041445	0.0820458	0.0464466	0.0732726	0.0997721	0.0898707	0.396259	0.057269	0.0299797	0.541149	0.0916004	0.0505195	0.0563718	0.293663	0.0400763	0.0496159	0.0581653	0.0590607	0.0469	0.358974	0.0794226	0.3608	0.508156	0.0644155	0.0437217	0.530777	0.100628	0.0670815
G Beta:gamma Signalling Through PI3Kgamma	58	48	245502	154.488	181	0.0687831	0.00129958	0.449177	56.3536	JAK2 (9.82 %) PIK3CG (6.95 %) JAK3 (5.73 %) JAK1 (4.09 %) RHOA (2.45 %) SHC1 (2.45 %) AKT1 (2.25 %) CSF2RB (2.25 %) GRB2 (2.25 %) PIK3CD (2.25 %) GAB2 (2.04 %) AKT3 (1.84 %) IL2RG (1.84 %) IL3RA (1.84 %) AKT2 (1.64 %) GNB4 (1.64 %) IL5RA (1.64 %) CSF2RA (1.43 %) GNG12 (1.43 %) PIK3R6 (1.43 %) GNB3 (1.23 %) IL2RB (1.23 %) IL3 (1.23 %) IL2 (1.02 %) IL2RA (1.02 %) PIK3CB (1.02 %) PIK3R3 (1.02 %) PIK…	0.0394623	0.150651	0.574483	0.0394623	0.69372	0.10781	0.111792	0.133379	0.133379	0.163846	0.764244	0.18051	0.331434	0.200427	0.300846	0.39002	0.357817	0.90682	0.242219	0.133379	0.974366	0.363537	0.216363	0.238821	0.805064	0.174993	0.212849	0.245601	0.248969	0.202214	0.876485	0.322401	0.878131	0.964466	0.268859	0.189624	0.971525	0.392742	0.278606
CDC42 Signaling Events	13	71	528189	238.383	267	0.0492354	0.00138672	0.474685	43.8202	CDH1 (17.59 %) CBL ( 7.98 %) MTOR ( 7.98 %) MAP2K4 ( 6.95 %) TIAM1 ( 6.95 %) CDC42BPA ( 6.34 %) IQGAP1 ( 5.52 %) CTNNA1 ( 4.91 %) ARHGEF7 ( 4.50 %) IQGAP3 ( 4.50 %) RASGRF1 ( 4.50 %) VAV2 ( 3.89 %) DIAPH3 ( 3.68 %) PAX6 ( 3.68 %) PLD1 ( 3.48 %) GSK3B ( 3.27 %) WASL ( 3.27 %) ARHGEF6 ( 2.86 %) MAPK8 ( 2.86 %) MAPK9 ( 2.66 %) PAK1 ( 2.66 %) RAF1 ( 2.66 %) MAP3K11 ( 2.45 %) LIMK2 ( 2.25 %) MAP2K7 ( …	0.0852694	0.303337	0.849146	0.0852694	0.927146	0.223161	0.230816	0.27159	0.27159	0.32707	0.959182	0.356399	0.58986	0.390516	0.547165	0.665214	0.624832	0.994771	0.458806	0.27159	0.9997	0.63219	0.41708	0.45342	0.973204	0.346768	0.411279	0.464139	0.469419	0.393526	0.990241	0.577493	0.990527	0.999381	0.500026	0.372137	0.999621	0.668513	0.514661
MyD88 Dependent Cascade Initiated On Endosome// TRAF6 Mediated Induction Of NFkB And MAP Kinases Upon TLR7/8 Or 9 Activation	86	10	45491	45.8365	64	0.144969	0.00149966	0.508455	78.125	TLR8 (3.68 %) TLR7 (3.48 %) TLR9 (2.86 %) IRAK2 (1.84 %) IRAK4 (1.64 %) ECSIT (1.23 %) IRAK1 (1.02 %) MYD88 (0.82 %) TRAF6 (0.82 %)	0.00717946	0.0287989	0.141796	0.00717946	0.190839	0.0202082	0.0209923	0.0252936	0.0252936	0.0315165	0.227862	0.0349993	0.0695189	0.0392391	0.0620396	0.0846655	0.0761993	0.346044	0.0484251	0.0252936	0.480915	0.0776772	0.0426942	0.047663	0.253692	0.0338398	0.0419275	0.0491866	0.0499475	0.0396236	0.312214	0.0672814	0.313864	0.449674	0.0545002	0.0369288	0.471056	0.085398	0.0567684
HDR Through Homologous Recombination (HRR)	316	46	263977	161.615	188	0.0656749	0.00152698	0.512835	53.1915	BRCA2 (12.68 %) POLE ( 7.57 %) BRCA1 ( 6.34 %) BLM ( 4.91 %) RAD50 ( 4.70 %) PALB2 ( 4.29 %) POLD1 ( 3.89 %) RFC1 ( 3.68 %) TOP3A ( 3.68 %) WRN ( 3.48 %) BRIP1 ( 3.27 %) MRE11A ( 2.86 %) POLD3 ( 2.86 %) RBBP8 ( 2.86 %) POLH ( 2.45 %) BARD1 ( 2.25 %) DNA2 ( 2.25 %) EXO1 ( 2.25 %) NBN ( 2.25 %) POLK ( 2.25 %) RPA1 ( 2.04 %) XRCC2 ( 1.64 %) RAD51AP1 ( 1.43 %) RFC4 ( 1.43 %) RFC5 ( 1.43 %) RMI1 ( 1.4…	0.0425465	0.161657	0.602557	0.0425465	0.721343	0.115903	0.120163	0.143233	0.143233	0.175713	0.789944	0.193439	0.352594	0.214587	0.320551	0.413636	0.380139	0.922911	0.258823	0.143233	0.98087	0.386099	0.231477	0.255234	0.828932	0.187573	0.227755	0.262395	0.26595	0.216482	0.895488	0.343143	0.896991	0.972781	0.286921	0.203121	0.978571	0.416462	0.297181
Regulation Of IFNA Signaling	203	26	73405	70.3462	91	0.111801	0.00162163	0.539533	68.1319	JAK1 (4.09 %) STAT1 (3.27 %) STAT2 (2.25 %) IFNA2 (2.04 %) PTPN1 (1.84 %) IFNA1 (1.64 %) IFNAR1 (1.64 %) IFNA10 (1.02 %) IFNA5 (1.02 %) IFNAR2 (1.02 %) IFNB1 (1.02 %) TYK2 (1.02 %) IFNA14 (0.82 %) IFNA16 (0.82 %) IFNA4 (0.82 %) PTPN6 (0.82 %) SOCS3 (0.82 %) IFNA6 (0.61 %) IFNA8 (0.61 %) USP18 (0.61 %) IFNA13 (0.41 %) IFNA17 (0.41 %) IFNA21 (0.41 %) IFNA7 (0.41 %)	0.0123525	0.0491589	0.231858	0.0123525	0.306003	0.0346039	0.0359362	0.0432313	0.0432313	0.0537439	0.359867	0.0596063	0.11688	0.0667223	0.104599	0.141532	0.127789	0.519365	0.0820617	0.0432313	0.677315	0.130195	0.0725044	0.0807931	0.396358	0.0576562	0.0712226	0.0833285	0.0845936	0.0673665	0.475673	0.113214	0.477841	0.643087	0.0921476	0.0628476	0.666671	0.142717	0.0959012
Fatty Acids Bound To GPR40 (FFAR1) Regulate Insulin Secretion	352	8	48585	56.1206	75	0.125939	0.00193166	0.636731	82.6667	PLCB1 (4.91 %) PLCB3 (3.27 %) GNAQ (2.25 %) PLCB2 (2.25 %) GNA14 (1.84 %) GNA11 (1.43 %) GNA15 (1.23 %) FFAR1 (0.82 %)	0.00922448	0.0368865	0.17854	0.00922448	0.238417	0.0259156	0.0269181	0.0324134	0.0324134	0.0403513	0.282938	0.0447877	0.0885084	0.0501821	0.0790743	0.107547	0.0969165	0.420886	0.0618462	0.0324134	0.569722	0.0987744	0.054573	0.0608797	0.313641	0.0433111	0.053599	0.0628117	0.0637762	0.050671	0.382073	0.0856884	0.383979	0.536132	0.0695426	0.0472435	0.559183	0.108466	0.0724124
Senescence And Autophagy In Cancer	172	7	37969	38.5812	55	0.153987	0.00221644	0.722355	85.4545	MTOR (7.98 %) ING1 (2.45 %) IRF1 (1.23 %) IFNB1 (1.02 %) JUN (0.41 %)	0.00583967	0.0234727	0.11688	0.00583967	0.158126	0.0164573	0.0170972	0.0206088	0.0206088	0.0256943	0.189573	0.0285433	0.0568858	0.0320141	0.0507284	0.0693839	0.0623933	0.291939	0.0395437	0.0206088	0.413139	0.0636128	0.0348446	0.0389185	0.21168	0.0275946	0.0342163	0.0401685	0.0407929	0.032329	0.262307	0.0550428	0.263746	0.384588	0.0445309	0.0301225	0.404096	0.0699893	0.0463944
Signaling By FGFR2 In Disease	121	27	135656	96.106	118	0.0891316	0.002232	0.722355	66.9492	FGFR2 (10.84 %) PLCG1 ( 3.89 %) GAB1 ( 3.27 %) SOS1 ( 3.07 %) GRB2 ( 2.25 %) FGF23 ( 1.43 %) FGF5 ( 1.43 %) FGF10 ( 1.02 %) FGF2 ( 1.02 %) FGF20 ( 1.02 %) FGF3 ( 1.02 %) FGF6 ( 1.02 %) FRS2 ( 1.02 %) FGF8 ( 0.82 %) HRAS ( 0.82 %) FGF1 ( 0.61 %) FGF16 ( 0.61 %) FGF17 ( 0.61 %) FGF18 ( 0.61 %) FGF7 ( 0.61 %) FGF22 ( 0.20 %) FGF9 ( 0.20 %)	0.0189861	0.0747945	0.334223	0.0189861	0.430698	0.0528626	0.0548777	0.0658844	0.0658844	0.0816658	0.49739	0.0904253	0.174434	0.101018	0.156662	0.209704	0.190108	0.676929	0.123703	0.0658844	0.82524	0.193551	0.109593	0.121835	0.540887	0.0875148	0.107695	0.125568	0.127428	0.101975	0.630536	0.169142	0.63289	0.795843	0.138508	0.0952556	0.816271	0.211386	0.143995
NRAGE Signals Death Through JNK	257	45	442727	219.246	246	0.0500044	0.00241054	0.773109	49.5935	OBSCN (16.56 %) KALRN ( 7.57 %) TIAM1 ( 6.95 %) MCF2 ( 6.75 %) VAV3 ( 5.52 %) AKAP13 ( 4.70 %) RASGRF2 ( 4.70 %) TIAM2 ( 4.70 %) ARHGEF7 ( 4.50 %) ARHGEF11 ( 4.29 %) VAV1 ( 4.29 %) ECT2 ( 3.89 %) FGD1 ( 3.89 %) VAV2 ( 3.89 %) NGEF ( 3.48 %) ABR ( 3.07 %) ARHGEF18 ( 3.07 %) SOS1 ( 3.07 %) ARHGEF17 ( 2.86 %) ARHGEF6 ( 2.86 %) FGD3 ( 2.86 %) MAPK8 ( 2.86 %) ARHGEF3 ( 2.45 %) MAGED1 ( 2.45 %) MCF2L (…	0.072848	0.264168	0.799151	0.072848	0.891707	0.192899	0.199654	0.235807	0.235807	0.285497	0.933766	0.312014	0.530637	0.343091	0.489485	0.604919	0.564829	0.988419	0.406109	0.235807	0.998975	0.572082	0.367471	0.401097	0.953659	0.303286	0.362132	0.41108	0.416008	0.345846	0.980336	0.518652	0.980826	0.998107	0.444726	0.326318	0.998751	0.608225	0.458551
Neurophilin Interactions With VEGF And VEGFR	277	4	44227	52.0824	70	0.128407	0.00247686	0.782472	77.1429	FLT1 (7.0 %) KDR (6.5 %) NRP2 (2.9 %) NRP1 (2.0 %)	0.00840055	0.0336342	0.16392	0.00840055	0.219582	0.0236187	0.0245335	0.0295494	0.0295494	0.0367993	0.261223	0.0408535	0.0809	0.0457855	0.0722444	0.0983923	0.0886209	0.391803	0.0564585	0.0295494	0.535911	0.0903279	0.049802	0.0555736	0.290075	0.039504	0.0489109	0.0573425	0.0582256	0.0462327	0.354806	0.0783118	0.356618	0.503044	0.0635073	0.0430985	0.525575	0.099237	0.0661371
RIG I/MDA5 Mediated Induction Of IFN Alpha/beta Pathways	206	13	73112	74.9178	95	0.103139	0.00248369	0.782472	76.8421	HERC5 (4.70 %) NLRC5 (4.70 %) IFIH1 (3.68 %) DDX58 (3.27 %) NLRX1 (2.86 %) UBA7 (2.45 %) TKFC (1.64 %) DHX58 (1.02 %) TRIM25 (1.02 %) RNF135 (0.61 %) MAVS (0.41 %) ISG15 (0.20 %)	0.0134355	0.0533803	0.249537	0.0134355	0.328023	0.0376003	0.0390456	0.0469564	0.0469564	0.0583468	0.384583	0.064694	0.126517	0.0723936	0.113289	0.153019	0.138252	0.549464	0.0889735	0.0469564	0.707977	0.140839	0.0786461	0.0876032	0.422664	0.0625831	0.0772604	0.0903417	0.0917078	0.0730904	0.50472	0.122569	0.506948	0.674113	0.0998618	0.0682017	0.697478	0.154291	0.103911
Validated Transcriptional Targets Of DeltaNp63 Isoforms	330	47	304273	171.981	197	0.0589857	0.00284301	0.887818	48.731	BRCA2 (12.68 %) COL5A1 ( 7.36 %) NRG1 ( 6.13 %) NOTCH1 ( 5.93 %) TOP2A ( 4.70 %) FASN ( 4.50 %) TP63 ( 4.29 %) WWP1 ( 3.68 %) GSK3B ( 3.27 %) AXL ( 3.07 %) MRE11A ( 2.86 %) ITGA3 ( 2.66 %) HELLS ( 2.45 %) T ( 2.45 %) PPP2R5A ( 2.04 %) KRT14 ( 1.84 %) MDM2 ( 1.84 %) DLX5 ( 1.64 %) IGFBP3 ( 1.64 %) KRT5 ( 1.64 %) BDKRB2 ( 1.43 %) ITCH ( 1.43 %) STXBP4 ( 1.43 %) ADA ( 1.23 %) TCF7L1 ( 1.23 %) CCNB2 …	0.047279	0.178336	0.642228	0.047279	0.759105	0.128228	0.132907	0.158195	0.158195	0.193667	0.824165	0.212959	0.383891	0.235912	0.349827	0.448245	0.41302	0.942436	0.283696	0.158195	0.987813	0.419304	0.254194	0.279831	0.860113	0.20658	0.250169	0.28754	0.291364	0.237966	0.919204	0.373863	0.920498	0.981949	0.31388	0.223477	0.98617	0.451206	0.324868
NAD+ + (S) Lactic Acid = NADH + Pyruvic Acid ( Glycolysis And Gluconeogenesis )// NAD+ + (S) Lactic Acid = NADH + Pyruvic Acid ( Pyruvate Metabolism )// NAD+ + 2 Hydroxy Butanoic Acid = NADH + 2 Oxo Butanoic Acid ( Propanoate Metabolism )// NAD+ + 3 Mercapto Lactic Acid = NADH + 3 Mercapto Pyruvic Acid ( Methionine And Cysteine Metabolism )	370	4	12981	18.0176	30	0.221425	0.00312972	0.968852	93.3333	LDHA (2.86 %) LDHB (1.64 %) LDHAL6B (1.43 %) LDHC (0.61 %)	0.00247298	0.0099915	0.0511905	0.00247298	0.0701837	0.00699092	0.00726407	0.00876508	0.00876508	0.0109443	0.0850287	0.012168	0.0244564	0.0136616	0.0217689	0.0299429	0.0268689	0.135798	0.0169126	0.00876508	0.201739	0.0274042	0.014882	0.0166421	0.0956646	0.0117603	0.0146109	0.017183	0.0174533	0.0137973	0.120689	0.0236509	0.121415	0.185546	0.0190739	0.0128472	0.196562	0.0302098	0.0198832
Regulation Of TP53 Activity Through Phosphorylation	170	89	524830	240.126	266	0.044442	0.00346411	1.06312	45.4887	TAF1L (11.45 %) ATR ( 9.41 %) STK11 ( 7.16 %) BRCA1 ( 6.34 %) CHEK2 ( 5.73 %) BLM ( 4.91 %) HIPK2 ( 4.91 %) RAD50 ( 4.70 %) TAF2 ( 4.29 %) TOPBP1 ( 4.29 %) TOP3A ( 3.68 %) WRN ( 3.48 %) BRIP1 ( 3.27 %) CCNA1 ( 3.27 %) PRKAA2 ( 3.27 %) SSRP1 ( 3.07 %) HIPK1 ( 2.86 %) MRE11A ( 2.86 %) NUAK1 ( 2.86 %) RBBP8 ( 2.86 %) SUPT16H ( 2.86 %) CHEK1 ( 2.45 %) TAF5 ( 2.45 %) BARD1 ( 2.25 %) DNA2 ( 2.25 %) EXO…	0.0864669	0.307029	0.853283	0.0864669	0.929898	0.22604	0.233778	0.274975	0.274975	0.330977	0.961056	0.360555	0.595198	0.394936	0.552408	0.670556	0.6302	0.995159	0.463668	0.274975	0.999733	0.637558	0.421686	0.458251	0.974592	0.350844	0.415846	0.46903	0.474339	0.397968	0.990883	0.582809	0.991154	0.999445	0.505095	0.376418	0.999662	0.67385	0.519791
TP53 Regulates Transcription Of Caspase Activators And Caspases	184	12	84046	63.6816	82	0.1098	0.00351537	1.06963	74.3902	NLRC4 (5.32 %) APAF1 (5.11 %) TP63 (4.29 %) CASP2 (1.64 %) CASP10 (1.43 %) CASP1 (1.23 %) PIDD1 (1.23 %) TP73 (1.23 %) CRADD (0.82 %) CASP6 (0.61 %)	0.0108424	0.0432489	0.206543	0.0108424	0.274131	0.0304157	0.0315894	0.0380196	0.0380196	0.0472965	0.323786	0.0524753	0.103284	0.0587668	0.092356	0.125276	0.113006	0.47407	0.0723491	0.0380196	0.629182	0.115153	0.0638833	0.0712248	0.357717	0.0507522	0.0627487	0.0734721	0.0745937	0.0593367	0.432365	0.100019	0.434424	0.5949	0.0812949	0.0553403	0.618475	0.126335	0.0846273
VEGFR3 Signaling In Lymphatic Endothelium	301	26	202730	129.721	152	0.0688318	0.00396147	1.19516	64.4737	MAP2K4 (6.95 %) COL1A2 (5.32 %) FLT4 (3.68 %) COL1A1 (3.48 %) ITGA4 (3.48 %) ITGA5 (3.48 %) SOS1 (3.07 %) VEGFC (2.86 %) ITGA1 (2.45 %) ITGB1 (2.45 %) SHC1 (2.45 %) AKT1 (2.25 %) GRB2 (2.25 %) ITGA2 (2.25 %) PRRT2 (1.84 %) RPS6KA1 (1.84 %) MAPK14 (1.64 %) FIGF (1.23 %) CREB1 (0.61 %) MAPK1 (0.61 %) MAPK3 (0.61 %)	0.0297729	0.115364	0.473468	0.0297729	0.588638	0.0820733	0.0851509	0.101894	0.101894	0.125702	0.662012	0.138815	0.260847	0.154576	0.235603	0.310023	0.282854	0.831632	0.187969	0.101894	0.936103	0.287655	0.167257	0.185238	0.706968	0.134466	0.164455	0.190692	0.193405	0.155995	0.79196	0.253363	0.794046	0.918351	0.209496	0.146015	0.930856	0.312336	0.21742
Nonhomologous End Joining (NHEJ)	323	69	350615	189.612	214	0.052547	0.00420607	1.25829	55.1402	PRKDC (14.11 %) RIF1 ( 9.20 %) HERC2 ( 9.00 %) BRCA1 ( 6.34 %) RAD50 ( 4.70 %) WHSC1 ( 4.70 %) PAXIP1 ( 4.09 %) MDC1 ( 3.48 %) LIG4 ( 3.07 %) BRE ( 2.86 %) MRE11A ( 2.86 %) XRCC5 ( 2.66 %) BARD1 ( 2.25 %) NBN ( 2.25 %) POLM ( 2.25 %) RNF168 ( 2.04 %) DCLRE1C ( 1.84 %) UIMC1 ( 1.84 %) FAM175A ( 1.64 %) RNF8 ( 1.43 %) XRCC4 ( 1.43 %) XRCC6 ( 1.43 %) KAT5 ( 1.23 %) HIST1H2BA ( 1.02 %) HIST1H4L ( 1.0…	0.0560261	0.208504	0.705832	0.0560261	0.816303	0.150715	0.156139	0.185354	0.185354	0.226053	0.873718	0.248046	0.438176	0.27408	0.401006	0.507321	0.469653	0.966578	0.327794	0.185354	0.994735	0.476405	0.294708	0.323474	0.903817	0.240786	0.290175	0.332087	0.336352	0.276401	0.949961	0.427274	0.950913	0.991596	0.361377	0.259993	0.99388	0.510467	0.373534
Cytokine Receptor Degradation Signaling ( JAK STAT Pathway And Regulation Pathway Diagram )// Negative Regulation Of (Phosphorylation Of Cytokine Receptor) In JAK STAT Pathway ( JAK STAT Pathway And Regulation Pathway Diagram )	224	41	216776	156.934	180	0.0595543	0.00453734	1.34608	60	LIFR (6.34 %) OSMR (4.50 %) IL12RB2 (3.89 %) LEPR (3.89 %) IL13RA2 (3.48 %) IL18R1 (3.27 %) CSF3R (3.07 %) IL7R (2.45 %) CSF2RB (2.25 %) IL6ST (2.04 %) PRLR (2.04 %) CNTFR (1.84 %) GHR (1.84 %) IL17RA (1.84 %) IL1R2 (1.84 %) IL2RG (1.84 %) IL3RA (1.84 %) MPL (1.84 %) IFNAR1 (1.64 %) IL5RA (1.64 %) CSF2RA (1.43 %) IFNGR1 (1.43 %) IL1R1 (1.43 %) IL1RAP (1.43 %) IL6R (1.43 %) CXCR2 (1.23 %) IL10RB (…	0.0405055	0.154386	0.584184	0.0405055	0.703347	0.110552	0.114629	0.136721	0.136721	0.167875	0.773262	0.184902	0.33866	0.20524	0.307567	0.398104	0.365448	0.912601	0.24787	0.136721	0.97678	0.371252	0.221502	0.244407	0.81348	0.179265	0.217918	0.251318	0.25475	0.207064	0.883263	0.329482	0.884861	0.967527	0.275013	0.19421	0.974132	0.400863	0.284937
Drosophila Toll Like Receptor Signaling ( Drosophila Toll Like Receptor Signaling )	27	235	1481942	375.659	397	0.0239965	0.00476085	1.40071	23.9295	KIT (22.90 %) CASP5 (11.04 %) FGFR2 (10.84 %) PDGFRA (10.43 %) MET (10.02 %) JAK2 ( 9.82 %) ALK ( 7.98 %) MTOR ( 7.98 %) FLT1 ( 6.95 %) MAP2K4 ( 6.95 %) KDR ( 6.54 %) ACVR2A ( 5.73 %) JAK3 ( 5.73 %) TLL1 ( 5.73 %) PRKCB ( 5.11 %) CDC7 ( 4.91 %) ITK ( 4.91 %) RPS6KA2 ( 4.91 %) CHUK ( 4.70 %) FGFR3 ( 4.70 %) PRKCG ( 4.70 %) ESPL1 ( 4.50 %) PRKCI ( 4.50 %) IGF1R ( 4.29 %) INSR ( 4.29 %) PAK7 ( 4.29 …	0.23449	0.661657	0.996555	0.23449	0.999611	0.530976	0.544697	0.613293	0.613293	0.695051	0.999932	0.73319	0.930895	0.773388	0.907006	0.962401	0.947099	1	0.841309	0.613293	1	0.950149	0.801729	0.836527	0.999981	0.721039	0.795754	0.845952	0.850458	0.776727	0.999999	0.924457	0.999999	1	0.87486	0.752277	1	0.963501	0.885524
Regulation Of Gene Expression By Hypoxia Inducible Factor	291	10	74892	65.8676	83	0.100406	0.00628455	1.83385	79.5181	EP300 (9.20 %) HIF3A (3.27 %) HIF1A (2.45 %) CA9 (2.25 %) EPAS1 (1.64 %) ARNT (1.43 %) VEGFA (1.02 %) CITED2 (0.61 %) EPO (0.20 %)	0.0113289	0.0451557	0.214783	0.0113289	0.284549	0.0317661	0.0329911	0.0397007	0.0397007	0.0493771	0.33562	0.0547772	0.107684	0.0613356	0.0963161	0.130544	0.117793	0.489102	0.0754875	0.0397007	0.645416	0.120024	0.0666678	0.0743163	0.370421	0.0529806	0.0654855	0.0766571	0.0778253	0.0619296	0.446686	0.104289	0.448784	0.611086	0.0848033	0.057764	0.634709	0.131644	0.0882725
Cyclin D Associated Events In G1	150	38	211328	142.61	164	0.0606928	0.00651854	1.87598	63.4146	RB1 (20.65 %) RBL2 ( 4.70 %) RBL1 ( 3.68 %) TFDP1 ( 2.04 %) CCNH ( 1.43 %) E2F5 ( 1.43 %) PPP2R2A ( 1.43 %) UBC ( 1.43 %) E2F2 ( 1.23 %) E2F3 ( 1.23 %) CDKN2A ( 1.02 %) PPP2R3B ( 1.02 %) TFDP2 ( 1.02 %) CDK4 ( 0.82 %) MNAT1 ( 0.82 %) PPP2R1B ( 0.82 %) CCND2 ( 0.61 %) CDK6 ( 0.61 %) CDK7 ( 0.61 %) CDKN2C ( 0.61 %) PPP2CA ( 0.61 %) PPP2CB ( 0.61 %) SKP2 ( 0.61 %) UBA52 ( 0.61 %) CCND1 ( 0.41 %) CCN…	0.0346202	0.133152	0.526563	0.0346202	0.644943	0.0950075	0.0985435	0.117746	0.117746	0.144949	0.717619	0.15988	0.296956	0.177776	0.268888	0.351174	0.321296	0.874673	0.215509	0.117746	0.959492	0.326589	0.192134	0.212432	0.760901	0.154932	0.188965	0.218575	0.221628	0.179384	0.839617	0.288651	0.84149	0.946092	0.239698	0.168062	0.955589	0.353709	0.248575
T Cell Activation	129	60	380090	197.817	221	0.0481276	0.00653432	1.87598	52.0362	ITPR1 (8.18 %) PIK3CG (6.95 %) PTPRC (5.73 %) VAV3 (5.52 %) PIK3C3 (5.32 %) CHUK (4.70 %) VAV1 (4.29 %) PLCG1 (3.89 %) VAV2 (3.89 %) PAK3 (3.68 %) CD3G (3.27 %) PRKCQ (3.27 %) SOS1 (3.07 %) MAPK8 (2.86 %) MAPK9 (2.66 %) PAK1 (2.66 %) RAF1 (2.66 %) ZAP70 (2.45 %) AKT1 (2.25 %) LCP2 (2.25 %) PAK2 (2.25 %) PIK3CD (2.25 %) ARAF (2.04 %) PPP3CB (2.04 %) AKT3 (1.84 %) LCK (1.84 %) AKT2 (1.64 %) IKBKB (…	0.0604087	0.223301	0.733495	0.0604087	0.839784	0.16184	0.167623	0.198722	0.198722	0.241896	0.893141	0.265151	0.463722	0.292607	0.425278	0.534681	0.496118	0.974596	0.349002	0.198722	0.996553	0.503047	0.314306	0.344479	0.92038	0.25748	0.309542	0.353494	0.357954	0.295051	0.960706	0.452467	0.961513	0.994286	0.384079	0.27776	0.995944	0.537892	0.396739
SMAD2/3 MH2 Domain Mutants In Cancer// SMAD2/3 Phosphorylation Motif Mutants In Cancer// TGFBR1 KD Mutants In Cancer	236	8	81774	35.222	49	0.143382	0.00674408	1.92071	79.5918	ZFYVE9 (4.09 %) SMAD3 (3.89 %) TGFBR1 (3.48 %) FKBP1A (0.41 %) TGFB1 (0.41 %)	0.00524709	0.0211099	0.105641	0.00524709	0.143253	0.0147954	0.0153711	0.0185316	0.0185316	0.0231106	0.172055	0.0256769	0.0512492	0.0288043	0.0456871	0.0625504	0.0562274	0.266627	0.0355929	0.0185316	0.380438	0.0573301	0.0313556	0.035029	0.19237	0.0248222	0.0307892	0.0361565	0.0367198	0.0290881	0.239116	0.049584	0.24045	0.353428	0.0400923	0.0270997	0.371869	0.0630982	0.0417742
Signaling By FGFR3 Fusions In Cancer	122	10	69957	46.0878	61	0.121744	0.00736103	2.07978	80.3279	FGFR3 (4.70 %) GAB1 (3.27 %) SOS1 (3.07 %) GRB2 (2.25 %) FRS2 (1.02 %) HRAS (0.82 %)	0.00722737	0.0289889	0.142675	0.00722737	0.191986	0.0203421	0.0211314	0.0254609	0.0254609	0.0317242	0.229198	0.0352295	0.0699678	0.0394967	0.0624419	0.0852077	0.0766895	0.347902	0.0487414	0.0254609	0.483189	0.0781766	0.0429739	0.0479744	0.255154	0.0340625	0.0422023	0.0495077	0.0502735	0.0398837	0.313936	0.0677164	0.315593	0.45187	0.054855	0.0371715	0.473308	0.0859447	0.0571375
Raf Activation Signaling (through Grb2 And Sos) ( B Cell Receptor Signaling )// Raf Activation Signaling (through Grb2 And Sos) ( CD4 T Cell Receptor Signaling (ERK Cascade) )// Raf Activation Signaling (through Grb2 And Sos) ( CD4 T Cell Receptor Signaling )// Raf Activation Signaling (through Grb2 And Sos) ( JAK STAT Pathway And Regulation Pathway Diagram )	111	9	56284	34.8218	48	0.13939	0.00880389	2.46786	91.6667	SOS1 (3.07 %) RAF1 (2.66 %) GRB2 (2.25 %) ARAF (2.04 %) HRAS (0.82 %)	0.00517765	0.0208327	0.104315	0.00517765	0.141493	0.0146005	0.0151687	0.0182879	0.0182879	0.0228074	0.169978	0.0253405	0.0505866	0.0284275	0.0450947	0.0617465	0.0555023	0.263603	0.035129	0.0182879	0.37649	0.0565912	0.030946	0.0345723	0.190077	0.0244969	0.0303869	0.0356854	0.0362414	0.0287077	0.236352	0.0489423	0.237672	0.349676	0.039571	0.0267449	0.367981	0.0622875	0.0412314
SMAD2/SMAD3:SMAD4 Heterotrimer Regulates Transcription	173	32	206492	124.344	144	0.0637388	0.00887541	2.46847	67.3611	MEN1 (5.73 %) SMAD3 (3.89 %) RBL1 (3.68 %) TGIF1 (3.48 %) RNF111 (3.07 %) CCNT1 (2.04 %) SNW1 (2.04 %) TFDP1 (2.04 %) CCNT2 (1.84 %) SERPINE1 (1.84 %) ATP1B4 (1.64 %) CDK8 (1.43 %) E2F5 (1.43 %) SP1 (1.43 %) UBC (1.43 %) WWTR1 (1.43 %) CDK9 (1.02 %) HDAC1 (1.02 %) MYC (1.02 %) TFDP2 (1.02 %) CCNC (0.82 %) TGIF2 (0.82 %) CCNK (0.61 %) UBA52 (0.61 %) E2F4 (0.41 %) SMAD7 (0.41 %) JUNB (0.20 %)	0.0278713	0.108312	0.451128	0.0278713	0.564273	0.0769669	0.0798614	0.0956196	0.0956196	0.11806	0.637407	0.130438	0.246232	0.14533	0.222182	0.293235	0.267241	0.811034	0.176942	0.0956196	0.923641	0.271829	0.157324	0.174353	0.682716	0.126331	0.154673	0.179523	0.182096	0.146671	0.769688	0.239096	0.771848	0.903964	0.197365	0.137239	0.917792	0.295451	0.204892
IFN Alpha Signaling Pathway((JAK1 TYK2 STAT1 STAT2) ( IFN Alpha Signaling(JAK1 TYK2 STAT1 STAT2 STAT3) )// IFN Alpha Signaling Pathway(JAK1 TYK2 STAT1 STAT3) ( IFN Alpha Signaling(JAK1 TYK2 STAT1 STAT2 STAT3) )// IFN Alpha Signaling Pathway(JAK1 TYK2 STAT1) ( IFN Alpha Signaling(JAK1 TYK2 STAT1 STAT2 STAT3) )// IFN Alpha Signaling Pathway(JAK1 TYK2 STAT3) ( IFN Alpha Signaling(JAK1 TYK2 STAT1 STA…	194	21	62997	68.5797	85	0.0932234	0.00907547	2.50455	70.5882	JAK1 (4.09 %) STAT1 (3.27 %) STAT2 (2.25 %) IFNA2 (2.04 %) STAT3 (2.04 %) IFNA1 (1.64 %) IFNAR1 (1.64 %) IRF9 (1.23 %) IFNA10 (1.02 %) IFNA5 (1.02 %) IFNAR2 (1.02 %) TYK2 (1.02 %) IFNA14 (0.82 %) IFNA16 (0.82 %) IFNA4 (0.82 %) IFNA6 (0.61 %) IFNA8 (0.61 %) IFNA13 (0.41 %) IFNA17 (0.41 %) IFNA21 (0.41 %) IFNA7 (0.41 %)	0.0119444	0.0475644	0.225093	0.0119444	0.297525	0.0334731	0.0347627	0.0418248	0.0418248	0.0520047	0.350304	0.0576833	0.113224	0.0645777	0.101305	0.137166	0.123816	0.507516	0.0794454	0.0418248	0.664952	0.126153	0.070181	0.0782155	0.386144	0.0557943	0.0689387	0.0806736	0.0819002	0.065202	0.464299	0.109665	0.466441	0.630653	0.0892256	0.0608234	0.654273	0.138318	0.0928664
Energy Dependent Regulation Of MTOR By LKB1 AMPK	31	28	160794	130.916	150	0.0590975	0.0116676	3.19513	64.6667	MTOR (7.98 %) STK11 (7.16 %) RPTOR (4.50 %) TSC2 (3.48 %) PRKAA2 (3.27 %) TSC1 (2.66 %) CAB39L (2.04 %) PRKAA1 (2.04 %) RRAGB (1.64 %) STRADB (1.64 %) PPM1A (1.43 %) PRKAG2 (1.43 %) RRAGD (1.43 %) RHEB (1.23 %) PRKAB1 (1.02 %) PRKAB2 (1.02 %) PRKAG1 (1.02 %) PRKAG3 (1.02 %) RRAGC (1.02 %) STRADA (1.02 %) LAMTOR5 (0.61 %) CAB39 (0.41 %) LAMTOR2 (0.41 %) MLST8 (0.41 %) LAMTOR1 (0.20 %) LAMTOR3 (0.2…	0.0302049	0.116961	0.478422	0.0302049	0.593987	0.0832309	0.0863498	0.103315	0.103315	0.127431	0.667372	0.14071	0.264132	0.156665	0.238623	0.313786	0.286359	0.835994	0.190457	0.103315	0.938641	0.291206	0.1695	0.187694	0.712221	0.136306	0.166665	0.193211	0.195956	0.158101	0.796718	0.25657	0.798786	0.92131	0.212229	0.147999	0.933525	0.31612	0.220242
MAP3K8 (TPL2) Dependent MAPK1/3 Activation	79	16	84177	75.8537	92	0.0838113	0.012161	3.30482	78.2609	MAP2K4 (6.95 %) CHUK (4.70 %) FBXW11 (2.86 %) NFKB1 (2.04 %) BTRC (1.84 %) IKBKB (1.64 %) UBC (1.43 %) TNIP2 (1.02 %) MAP3K8 (0.61 %) UBA52 (0.61 %) IKBKG (0.41 %) SKP1 (0.41 %)	0.0136621	0.0542616	0.253185	0.0136621	0.332544	0.0382263	0.0396952	0.0477343	0.0477343	0.0593075	0.389634	0.0657555	0.12852	0.0735764	0.115098	0.155404	0.140426	0.555522	0.0904137	0.0477343	0.714016	0.14305	0.0799266	0.0890223	0.428023	0.0636111	0.0785192	0.0918029	0.09319	0.0742841	0.510593	0.124515	0.512832	0.680258	0.101468	0.0693186	0.703557	0.156693	0.105579
TP53 Regulates Transcription Of Death Receptors And Ligands	185	12	58774	61.1274	76	0.0945775	0.0132468	3.57263	82.8947	TP63 (4.29 %) TP53BP2 (2.86 %) PPP1R13B (2.04 %) FAS (1.84 %) TNFRSF10C (1.84 %) IGFBP3 (1.64 %) TNFRSF10A (1.43 %) TNFRSF10B (1.23 %) TP73 (1.23 %) TNFRSF10D (0.61 %) TMEM219 (0.41 %)	0.0102847	0.0410593	0.196995	0.0102847	0.262007	0.028866	0.0299809	0.0360898	0.0360898	0.0449068	0.309968	0.049831	0.0982152	0.0558148	0.0877971	0.119202	0.10749	0.456303	0.0687401	0.0360898	0.609666	0.109538	0.0606827	0.0676698	0.342845	0.0481924	0.0596031	0.0698092	0.0708771	0.056357	0.4155	0.0951023	0.417511	0.575524	0.0772585	0.0525556	0.598986	0.120213	0.0804328
G Alpha (12/13) Signalling Events	251	75	583526	246.802	268	0.0357853	0.0138441	3.70564	48.1343	OBSCN (16.56 %) KALRN ( 7.57 %) TIAM1 ( 6.95 %) MCF2 ( 6.75 %) ROCK1 ( 5.52 %) VAV3 ( 5.52 %) AKAP13 ( 4.70 %) RASGRF2 ( 4.70 %) TIAM2 ( 4.70 %) ARHGEF7 ( 4.50 %) ARHGEF11 ( 4.29 %) PLXNB1 ( 4.29 %) VAV1 ( 4.29 %) ECT2 ( 3.89 %) FGD1 ( 3.89 %) VAV2 ( 3.89 %) NGEF ( 3.48 %) ABR ( 3.07 %) ARHGEF1 ( 3.07 %) ARHGEF18 ( 3.07 %) SOS1 ( 3.07 %) ARHGEF17 ( 2.86 %) ARHGEF6 ( 2.86 %) FGD3 ( 2.86 %) ADRA1A …	0.0911624	0.321361	0.868481	0.0911624	0.93975	0.237258	0.245316	0.288138	0.288138	0.346125	0.967632	0.376642	0.61553	0.412012	0.572448	0.690754	0.650579	0.996427	0.482373	0.288138	0.999833	0.657923	0.439454	0.476846	0.97939	0.366631	0.433468	0.487842	0.493253	0.415126	0.993024	0.603082	0.993243	0.999638	0.524538	0.392976	0.999786	0.694021	0.539449
TRIF Mediated Programmed Cell Death	347	10	36964	37.5338	50	0.124547	0.0143027	3.79982	80	TLR3 (2.86 %) TICAM1 (2.45 %) TLR4 (2.25 %) CD14 (1.23 %) RIPK1 (1.23 %) RIPK3 (1.23 %) LY96 (0.61 %) TICAM2 (0.61 %) FADD (0.20 %)	0.00565306	0.0227291	0.113355	0.00565306	0.153469	0.0159341	0.0165538	0.019955	0.019955	0.0248812	0.184095	0.0276413	0.055114	0.0310042	0.0491434	0.0672368	0.0604555	0.284062	0.038301	0.019955	0.40303	0.0616384	0.033747	0.0376951	0.205648	0.0267222	0.0331381	0.0389066	0.0395118	0.0313093	0.25508	0.0533268	0.256486	0.374939	0.043135	0.0291714	0.394127	0.0678242	0.0449415
Validated Targets Of C MYC Transcriptional Repression	139	63	416109	193.738	214	0.0431992	0.0148046	3.90403	50	EP300 (9.20 %) ERBB2 (7.36 %) BRCA1 (6.34 %) COL1A2 (5.32 %) PDGFRB (4.09 %) SMAD3 (3.89 %) RBL1 (3.68 %) ITGB4 (3.48 %) TSC2 (3.48 %) CEBPA (3.27 %) CSDE1 (3.27 %) ITGA6 (3.27 %) TJP2 (3.07 %) ITGB1 (2.45 %) DNTT (2.25 %) CLU (1.84 %) DKK1 (1.84 %) NFYC (1.84 %) GFI1 (1.64 %) WNT5A (1.64 %) SP1 (1.43 %) TMEM126A (1.43 %) HMGCS2 (1.23 %) SLC11A1 (1.23 %) TMEFF2 (1.23 %) DDIT3 (1.02 %) HDAC1 (1.02…	0.0582042	0.215884	0.719906	0.0582042	0.82836	0.156256	0.161859	0.192018	0.192018	0.233959	0.883765	0.256586	0.451006	0.283337	0.413181	0.521098	0.48296	0.970833	0.338407	0.192018	0.995734	0.489804	0.304506	0.333984	0.91243	0.249119	0.299856	0.342801	0.347165	0.28572	0.955619	0.439922	0.956497	0.993061	0.372749	0.268867	0.99501	0.524278	0.385163
Signaling Events Mediated By Hepatocyte Growth Factor Receptor (c Met)	262	80	551119	240.137	261	0.0361808	0.0150228	3.93243	39.4636	CDH1 (17.59 %) MET (10.02 %) CBL ( 7.98 %) MTOR ( 7.98 %) MAP2K4 ( 6.95 %) CTNNA1 ( 4.91 %) PRKCI ( 4.50 %) RPTOR ( 4.50 %) PTK2 ( 4.09 %) PLCG1 ( 3.89 %) RAPGEF1 ( 3.89 %) GAB1 ( 3.27 %) PTPRJ ( 3.27 %) WASL ( 3.27 %) INPPL1 ( 3.07 %) SOS1 ( 3.07 %) MAPK8 ( 2.86 %) HGF ( 2.66 %) INPP5D ( 2.66 %) PAK1 ( 2.66 %) RAF1 ( 2.66 %) EGR1 ( 2.45 %) EPS15 ( 2.45 %) HGS ( 2.45 %) RHOA ( 2.45 %) SHC1 ( 2.45…	0.0864746	0.307053	0.853309	0.0864746	0.929915	0.226058	0.233797	0.274997	0.274997	0.331002	0.961068	0.360581	0.595232	0.394964	0.552441	0.67059	0.630234	0.995162	0.463699	0.274997	0.999734	0.637592	0.421715	0.458282	0.974601	0.35087	0.415875	0.469061	0.47437	0.397996	0.990887	0.582843	0.991158	0.999445	0.505127	0.376446	0.999663	0.673884	0.519824
Chemokine Receptors Bind Chemokines	222	57	137882	105.853	123	0.0652014	0.0151784	3.94418	69.1057	ACKR3 (4.29 %) ACKR2 (2.66 %) CCR3 (2.25 %) CCR5 (1.84 %) CCR9 (1.64 %) CCR1 (1.43 %) CCR2 (1.43 %) CCR7 (1.43 %) CCR8 (1.43 %) CXCL9 (1.43 %) CXCR4 (1.43 %) ACKR4 (1.23 %) CXCL5 (1.23 %) CXCL8 (1.23 %) CXCR2 (1.23 %) XCR1 (1.23 %) CCRL2 (1.02 %) CX3CL1 (1.02 %) CX3CR1 (1.02 %) PPBP (1.02 %) CCL28 (0.82 %) CXCL11 (0.82 %) CXCR1 (0.82 %) CXCR3 (0.82 %) XCL2 (0.82 %) CXCL16 (0.61 %) PF4 (0.61 %) CC…	0.0218514	0.0857051	0.374295	0.0218514	0.477593	0.0606797	0.0629828	0.0755491	0.0755491	0.0935271	0.547477	0.103486	0.198233	0.115509	0.178307	0.237583	0.215752	0.728094	0.141184	0.0755491	0.866082	0.219593	0.125226	0.139073	0.59231	0.100178	0.123076	0.14329	0.14539	0.116594	0.682616	0.192306	0.684945	0.839798	0.157886	0.108971	0.858129	0.239452	0.164065
PDGF Signaling Pathway	95	113	812792	293.427	314	0.0294298	0.0153077	3.94894	42.6752	PDGFRA (10.43 %) JAK2 ( 9.82 %) ARHGAP5 ( 9.00 %) ITPR1 ( 8.18 %) ITPR3 ( 6.95 %) PIK3CG ( 6.95 %) ITPR2 ( 6.13 %) JAK3 ( 5.73 %) VAV3 ( 5.52 %) PIK3C3 ( 5.32 %) RPS6KA2 ( 4.91 %) CHUK ( 4.70 %) PLCG2 ( 4.50 %) SRGAP1 ( 4.50 %) VAV1 ( 4.29 %) JAK1 ( 4.09 %) PDGFRB ( 4.09 %) PLCG1 ( 3.89 %) RASA1 ( 3.89 %) STAT5B ( 3.89 %) VAV2 ( 3.89 %) RASA2 ( 3.68 %) RPS6KA6 ( 3.68 %) RPS6KC1 ( 3.68 %) MAPK6 ( …	0.129451	0.430062	0.947244	0.129451	0.982995	0.324829	0.335149	0.389155	0.389155	0.459975	0.993094	0.49614	0.750005	0.537068	0.708373	0.817697	0.782367	0.999717	0.615195	0.389155	0.999997	0.78897	0.56807	0.609221	0.996411	0.484362	0.561365	0.621076	0.626868	0.54062	0.999254	0.738182	0.999288	0.99999	0.659808	0.515174	0.999995	0.820484	0.675171
GRB2:SOS Provides Linkage To MAPK Signaling For Integrins	62	15	118635	96.65	113	0.0678767	0.0169944	4.35252	64.6018	VWF (6.54 %) FGA (4.50 %) TLN1 (4.29 %) PTK2 (4.09 %) APBB1IP (3.89 %) SOS1 (3.07 %) ITGB3 (2.66 %) GRB2 (2.25 %) ITGA2B (2.04 %) FGG (1.43 %) FGB (1.23 %) SRC (0.82 %) RAP1A (0.41 %) RAP1B (0.41 %)	0.0191406	0.0753855	0.336446	0.0191406	0.433328	0.0532853	0.055316	0.0664076	0.0664076	0.0823086	0.500224	0.0911336	0.175734	0.101805	0.157842	0.211232	0.191511	0.679916	0.124654	0.0664076	0.827728	0.194976	0.110442	0.122772	0.543815	0.0882014	0.10853	0.126532	0.128405	0.102768	0.633548	0.170407	0.635901	0.798492	0.139563	0.0959997	0.818812	0.212923	0.145088
G2/M DNA Damage Checkpoint// Processing Of DNA Double Strand Break Ends	154	100	464250	218.017	238	0.0380867	0.0179136	4.55517	53.3613	ATR (9.41 %) HERC2 (9.00 %) BRCA1 (6.34 %) CHEK2 (5.73 %) BLM (4.91 %) RAD50 (4.70 %) WHSC1 (4.70 %) TOPBP1 (4.29 %) TOP3A (3.68 %) MDC1 (3.48 %) WRN (3.48 %) BRIP1 (3.27 %) CCNA1 (3.27 %) BRE (2.86 %) MRE11A (2.86 %) RBBP8 (2.86 %) TIMELESS (2.66 %) CHEK1 (2.45 %) BARD1 (2.25 %) DNA2 (2.25 %) EXO1 (2.25 %) NBN (2.25 %) RNF168 (2.04 %) RPA1 (2.04 %) UIMC1 (1.84 %) FAM175A (1.64 %) HUS1 (1.64 %) R…	0.0720943	0.261739	0.795657	0.0720943	0.889089	0.191039	0.197737	0.233596	0.233596	0.282912	0.931806	0.309244	0.526807	0.340119	0.485785	0.600958	0.560922	0.987851	0.402776	0.233596	0.998896	0.568162	0.364351	0.39779	0.952105	0.300576	0.359044	0.40772	0.412624	0.342856	0.979488	0.514856	0.979993	0.997975	0.441206	0.323453	0.998658	0.604261	0.454971
Polymerase Switching// Polymerase Switching On The C Strand Of The Telomere	214	14	55791	57.2837	71	0.0932272	0.0183394	4.63037	69.0141	POLD1 (3.89 %) RFC1 (3.68 %) POLD3 (2.86 %) POLA1 (2.45 %) RFC4 (1.43 %) RFC5 (1.43 %) POLA2 (1.23 %) PCNA (1.02 %) PRIM2 (1.02 %) PRIM1 (0.82 %) POLD2 (0.41 %) RFC2 (0.41 %)	0.00946692	0.0378419	0.182796	0.00946692	0.243874	0.0265908	0.027619	0.033255	0.033255	0.0413945	0.289208	0.0459428	0.0907363	0.0514725	0.0810755	0.110225	0.0993443	0.42918	0.0634265	0.033255	0.579198	0.101246	0.055973	0.0624361	0.320429	0.0444291	0.0549748	0.0644158	0.0654041	0.0519737	0.389878	0.0878488	0.39181	0.545447	0.0713119	0.0484603	0.568616	0.111165	0.0742518
IL2 Signaling Events Mediated By PI3K	68	38	227344	145.042	163	0.0506941	0.0191146	4.79212	54.6012	MTOR (7.98 %) JAK3 (5.73 %) EIF3A (4.29 %) JAK1 (4.09 %) SOS1 (3.07 %) NFATC2 (2.45 %) SHC1 (2.45 %) AKT1 (2.25 %) GRB2 (2.25 %) GAB2 (2.04 %) NFKB1 (2.04 %) HSP90AA1 (1.84 %) IL2RG (1.84 %) LCK (1.84 %) RELA (1.84 %) SMPD1 (1.84 %) UGCG (1.84 %) RPS6KB1 (1.64 %) TERT (1.64 %) MYB (1.43 %) IL2RB (1.23 %) IL2 (1.02 %) IL2RA (1.02 %) MYC (1.02 %) PRKCZ (1.02 %) FOXO3 (0.82 %) RPS6 (0.61 %) SGMS1 (0…	0.0355816	0.136648	0.536469	0.0355816	0.65519	0.097559	0.101184	0.120866	0.120866	0.148727	0.727538	0.164009	0.303927	0.182315	0.275335	0.359064	0.328695	0.881822	0.220876	0.120866	0.963004	0.334078	0.196994	0.217733	0.770383	0.158946	0.193755	0.224006	0.227124	0.183959	0.847707	0.29547	0.849536	0.950366	0.245568	0.17238	0.959333	0.361639	0.254624
Signaling By FGFR2 IIIa TM	120	19	82828	76.1538	91	0.07735	0.0193421	4.81525	85.7143	FGFR2 (10.84 %) POLR2A ( 3.07 %) NCBP1 ( 2.25 %) GTF2F1 ( 1.43 %) FGF2 ( 1.02 %) FGF1 ( 0.61 %) POLR2D ( 0.61 %) NCBP2 ( 0.41 %) POLR2E ( 0.41 %) POLR2F ( 0.41 %) POLR2H ( 0.41 %) GTF2F2 ( 0.20 %) POLR2C ( 0.20 %) POLR2I ( 0.20 %) POLR2K ( 0.20 %)	0.0137351	0.0545454	0.254358	0.0137351	0.333994	0.0384279	0.0399044	0.0479848	0.0479848	0.0596168	0.391253	0.0660973	0.129165	0.0739572	0.11568	0.156171	0.141126	0.557457	0.0908773	0.0479848	0.715936	0.143762	0.0803388	0.0894792	0.42974	0.0639421	0.0789245	0.0922733	0.0936671	0.0746685	0.512471	0.125141	0.514713	0.682214	0.101985	0.0696782	0.70549	0.157466	0.106116
Angiopoietin Receptor Tie2 Mediated Signaling	266	50	313954	176.333	195	0.0437008	0.0203812	5.03869	56.4103	TEK (5.93 %) PLG (5.32 %) NOS3 (4.29 %) PTK2 (4.09 %) RASA1 (3.89 %) STAT5B (3.89 %) FYN (3.48 %) ITGA5 (3.48 %) GRB14 (3.07 %) MMP2 (3.07 %) MAPK8 (2.86 %) PAK1 (2.66 %) ANGPT1 (2.45 %) ANGPT2 (2.45 %) ITGB1 (2.45 %) SHC1 (2.45 %) AGTR1 (2.25 %) AKT1 (2.25 %) ELF1 (2.25 %) GRB2 (2.25 %) ETS1 (2.04 %) F2 (2.04 %) NFKB1 (2.04 %) ANGPT4 (1.84 %) RELA (1.84 %) STAT5A (1.84 %) FOXO1 (1.64 %) MAPK14 (…	0.0493551	0.185573	0.658414	0.0493551	0.774065	0.1336	0.138459	0.164699	0.164699	0.201447	0.837407	0.221403	0.397186	0.245117	0.362313	0.462827	0.426938	0.949382	0.29438	0.164699	0.990008	0.433347	0.263981	0.290401	0.871973	0.214807	0.25983	0.298337	0.302272	0.247237	0.92786	0.386929	0.929067	0.984935	0.325423	0.232273	0.988596	0.46584	0.336709
GRB2 Events In EGFR Signaling// SHC1 Events In EGFR Signaling	61	8	51014	33.8173	45	0.124074	0.020808	5.10873	93.3333	SOS1 (3.07 %) SHC1 (2.45 %) GRB2 (2.25 %) EGF (1.23 %) HRAS (0.82 %)	0.00500438	0.0201409	0.100999	0.00500438	0.137088	0.0141141	0.0146635	0.0176799	0.0176799	0.0220508	0.164774	0.0245009	0.0489318	0.0274871	0.0436153	0.0597382	0.0536913	0.256005	0.0339708	0.0176799	0.36653	0.0547457	0.0299236	0.0334321	0.184329	0.0236849	0.0293826	0.0345091	0.0350472	0.0277581	0.229413	0.0473399	0.2307	0.34022	0.0382692	0.0258594	0.358177	0.0602622	0.0398762
Rho GTPase Cycle	261	122	1020247	326.74	345	0.0236162	0.0237993	5.80311	38.2609	OBSCN (16.56 %) ARHGAP5 ( 9.00 %) DLC1 ( 8.38 %) KALRN ( 7.57 %) TIAM1 ( 6.95 %) MCF2 ( 6.75 %) ARAP2 ( 5.52 %) VAV3 ( 5.52 %) A2M ( 5.32 %) ARHGAP32 ( 5.32 %) ARHGAP36 ( 5.32 %) ARHGAP20 ( 5.11 %) MYO9A ( 5.11 %) ARAP3 ( 4.91 %) AKAP13 ( 4.70 %) RASGRF2 ( 4.70 %) TIAM2 ( 4.70 %) ARHGAP31 ( 4.50 %) ARHGEF7 ( 4.50 %) SRGAP1 ( 4.50 %) ARHGAP35 ( 4.29 %) ARHGEF11 ( 4.29 %) VAV1 ( 4.29 %) OCRL ( 4.09…	0.164436	0.517404	0.977908	0.164436	0.994906	0.398906	0.410786	0.472049	0.472049	0.549969	0.998415	0.58863	0.834119	0.631402	0.797472	0.889825	0.861396	0.999975	0.709915	0.472049	1	0.866821	0.663068	0.704066	0.999322	0.576127	0.656275	0.715648	0.721267	0.635062	0.999911	0.823883	0.999917	1	0.752728	0.608655	1	0.892003	0.767101
FGF Signaling Pathway ( FGF Signaling Pathway )	46	44	264279	154.8	172	0.0457586	0.0256739	6.21763	59.3023	FGFR2 (10.84 %) FGFR3 ( 4.70 %) PLCG2 ( 4.50 %) FGFR1 ( 3.89 %) PLCG1 ( 3.89 %) GAB1 ( 3.27 %) SOS1 ( 3.07 %) PRKCD ( 2.86 %) RAF1 ( 2.66 %) FGF14 ( 2.45 %) FRS3 ( 2.45 %) FGF13 ( 2.25 %) FGFR4 ( 2.25 %) GRB2 ( 2.25 %) PIK3CD ( 2.25 %) ARAF ( 2.04 %) FGF23 ( 1.43 %) FGF5 ( 1.43 %) FGF10 ( 1.02 %) FGF2 ( 1.02 %) FGF20 ( 1.02 %) FGF3 ( 1.02 %) FGF6 ( 1.02 %) FRS2 ( 1.02 %) PIK3CB ( 1.02 %) FGF8 ( 0…	0.0395942	0.151124	0.575721	0.0395942	0.694954	0.108157	0.112151	0.133802	0.133802	0.164356	0.765404	0.181067	0.332352	0.201037	0.301699	0.391047	0.358787	0.907571	0.242935	0.133802	0.974685	0.364518	0.217014	0.23953	0.806149	0.175534	0.213492	0.246326	0.249702	0.202828	0.877363	0.3233	0.879003	0.964869	0.26964	0.190205	0.971868	0.393775	0.279409
Validated Nuclear Estrogen Receptor Alpha Network	329	65	420480	217.46	236	0.0355328	0.0258624	6.22096	50.8475	EP300 (9.20 %) DSCAM (7.98 %) NCOR2 (6.75 %) BRCA1 (6.34 %) NCOR1 (6.34 %) GREB1 (5.32 %) CHUK (4.70 %) NCOA2 (4.50 %) ESR1 (4.29 %) ABCA3 (4.09 %) C3 (4.09 %) COL18A1 (3.89 %) NCOA3 (3.48 %) NCOA7 (3.48 %) NRIP1 (3.48 %) SAFB (3.48 %) PGR (3.27 %) POU4F2 (3.27 %) NCOA1 (3.07 %) HDAC4 (2.86 %) MED1 (2.86 %) APBB1 (2.66 %) DDX17 (2.66 %) PRDM15 (2.66 %) NR0B1 (2.45 %) SFI1 (2.45 %) DDX54 (2.04 %) …	0.0717543	0.260641	0.794062	0.0717543	0.887889	0.190199	0.196871	0.232596	0.232596	0.281743	0.930903	0.307992	0.52507	0.338774	0.484107	0.599158	0.559148	0.987586	0.401266	0.232596	0.998859	0.566383	0.362939	0.396292	0.951387	0.299351	0.357646	0.406199	0.411092	0.341504	0.979094	0.513135	0.979607	0.997913	0.439611	0.322158	0.998614	0.602461	0.453348
PI3K/AKT Activation	102	9	58628	46.5058	58	0.0959208	0.0304145	7.26682	82.7586	IRS1 (4.50 %) NTRK1 (2.86 %) RHOA (2.45 %) IRS2 (1.23 %) NGF (1.23 %) PIK3CB (1.02 %) PIK3R2 (0.61 %)	0.00730728	0.0293059	0.144138	0.00730728	0.193895	0.0205655	0.0213634	0.0257398	0.0257398	0.0320705	0.231422	0.0356134	0.0707161	0.0399261	0.0631125	0.0861113	0.0775067	0.350988	0.0492687	0.0257398	0.486961	0.0790089	0.0434403	0.0484937	0.257584	0.0344339	0.0426605	0.0500432	0.050817	0.0403172	0.316799	0.0684415	0.318467	0.455515	0.0554466	0.0375761	0.477042	0.0868557	0.0577529
E Cadherin Signaling In The Nascent Adherens Junction	246	37	301335	176.955	194	0.0399385	0.0311584	7.39493	54.1237	CDH1 (17.59 %) TIAM1 ( 6.95 %) IQGAP1 ( 5.52 %) CTNNA1 ( 4.91 %) TJP1 ( 4.29 %) CTNND1 ( 3.89 %) RAPGEF1 ( 3.89 %) VAV2 ( 3.89 %) MLLT4 ( 3.27 %) NCKAP1 ( 3.07 %) KLHL20 ( 2.66 %) PIP5K1C ( 2.66 %) RHOA ( 2.45 %) AKT1 ( 2.25 %) ITGAE ( 2.25 %) AP1M1 ( 2.04 %) CYFIP2 ( 2.04 %) DLG1 ( 2.04 %) ITGB7 ( 1.84 %) JUP ( 1.84 %) ENAH ( 1.43 %) CTTN ( 1.02 %) WASF2 ( 1.02 %) ABI1 ( 0.82 %) CA2 ( 0.82 %) SR…	0.0496562	0.186619	0.660703	0.0496562	0.776159	0.134377	0.139262	0.16564	0.16564	0.202571	0.839245	0.222622	0.399093	0.246445	0.364107	0.464913	0.428932	0.950319	0.295919	0.16564	0.990292	0.435359	0.265392	0.291923	0.87361	0.215995	0.261223	0.299892	0.303843	0.248574	0.929038	0.388804	0.930232	0.985326	0.327083	0.233542	0.988911	0.467932	0.338411
Insulin Receptor Signalling Cascade	363	9	53097	48.5833	60	0.0916639	0.0332829	7.84682	88.3333	INSR (4.29 %) SOS1 (3.07 %) SHC1 (2.45 %) GRB2 (2.25 %) GRB10 (0.82 %) HRAS (0.82 %)	0.00770862	0.0308965	0.151451	0.00770862	0.203418	0.0216871	0.0225279	0.0271395	0.0271395	0.0338085	0.242495	0.0375397	0.0744664	0.0420805	0.066474	0.0906374	0.081601	0.366275	0.0519135	0.0271395	0.505497	0.0831789	0.0457798	0.051098	0.269677	0.0362976	0.044959	0.0527283	0.0535425	0.0424923	0.331	0.0720759	0.332723	0.473463	0.0584127	0.0396064	0.495403	0.091419	0.0608384
Negative Regulators Of RIG I/MDA5 Signaling	202	34	193867	139.437	155	0.0459526	0.0349263	8.18011	62.5806	TNFAIP3 (7.36 %) CYLD (4.70 %) HERC5 (4.70 %) NLRC5 (4.70 %) IFIH1 (3.68 %) DDX58 (3.27 %) NLRX1 (2.86 %) TAX1BP1 (2.66 %) TRAF3 (2.45 %) UBA7 (2.45 %) RNF216 (2.25 %) ATG5 (1.84 %) TBK1 (1.84 %) IKBKE (1.64 %) ITCH (1.43 %) UBC (1.43 %) OTUD5 (1.02 %) PCBP2 (1.02 %) RNF125 (1.02 %) TRIM25 (1.02 %) IRF3 (0.82 %) UBE2K (0.82 %) PIN1 (0.61 %) RNF135 (0.61 %) UBA52 (0.61 %) MAVS (0.41 %) ISG15 (0.20…	0.0333882	0.128657	0.513574	0.0333882	0.631383	0.0917315	0.0951521	0.113736	0.113736	0.140089	0.704394	0.154566	0.287933	0.17193	0.260552	0.340935	0.311708	0.864889	0.208587	0.113736	0.954508	0.316882	0.185871	0.205595	0.748191	0.149767	0.182793	0.211567	0.214537	0.173491	0.828633	0.279827	0.830562	0.940081	0.232119	0.162503	0.95029	0.343417	0.240762
Signaling By FGFR4 In Disease	124	11	79600	55.285	67	0.0834673	0.0356643	8.29835	82.0896	PLCG1 (3.89 %) GAB1 (3.27 %) SOS1 (3.07 %) FGFR4 (2.25 %) GRB2 (2.25 %) FRS2 (1.02 %) HRAS (0.82 %)	0.00905174	0.0362053	0.175496	0.00905174	0.234504	0.0254343	0.0264185	0.0318135	0.0318135	0.0396074	0.278437	0.0439639	0.086918	0.0492617	0.0776461	0.105635	0.0951829	0.414904	0.0607188	0.0318135	0.562841	0.0970094	0.0535744	0.0597693	0.308765	0.0425139	0.0526177	0.0616673	0.0626148	0.0497418	0.376451	0.0841462	0.378338	0.52938	0.06828	0.0463756	0.552338	0.106538	0.0710998
Ras Pathway	115	69	457806	218.88	236	0.0327066	0.0365909	8.45869	50.4237	MAP2K4 (6.95 %) PIK3CG (6.95 %) TIAM1 (6.95 %) PIK3C3 (5.32 %) RPS6KA2 (4.91 %) PAK3 (3.68 %) RPS6KA6 (3.68 %) MAPK10 (3.48 %) PLD1 (3.48 %) GSK3B (3.27 %) RPS6KA3 (3.27 %) STAT1 (3.27 %) SOS1 (3.07 %) MAPK8 (2.86 %) MAPK9 (2.66 %) PAK1 (2.66 %) RAF1 (2.66 %) RGL2 (2.45 %) RHOA (2.45 %) SHC1 (2.45 %) AKT1 (2.25 %) MAP2K7 (2.25 %) PAK2 (2.25 %) PIK3CD (2.25 %) RGL1 (2.25 %) ARAF (2.04 %) ETS1 (2.0…	0.072623	0.263443	0.798114	0.072623	0.890932	0.192344	0.199082	0.235147	0.235147	0.284726	0.933186	0.311188	0.529496	0.342205	0.488383	0.60374	0.563666	0.988253	0.405116	0.235147	0.998952	0.570915	0.366541	0.400112	0.9532	0.302478	0.361212	0.410079	0.415	0.344955	0.980087	0.517522	0.980581	0.998068	0.443677	0.325464	0.998724	0.607046	0.457484
Regulation Of Innate Immune Responses To Cytosolic DNA	205	14	62159	63.8995	76	0.0753158	0.0377466	8.66954	71.0526	NLRP4 (6.34 %) ZBP1 (2.66 %) TRIM32 (2.04 %) TRIM56 (2.04 %) DTX4 (1.84 %) TBK1 (1.84 %) DDX41 (1.43 %) UBC (1.43 %) IRF3 (0.82 %) TRIM21 (0.82 %) UBA52 (0.61 %) TMEM173 (0.41 %)	0.0108905	0.0434376	0.207362	0.0108905	0.275168	0.0305493	0.0317281	0.0381859	0.0381859	0.0475024	0.324966	0.0527032	0.10372	0.0590211	0.0927483	0.125799	0.113481	0.475576	0.0726599	0.0381859	0.63082	0.115635	0.064159	0.0715309	0.358984	0.0509727	0.0630197	0.0737875	0.0749137	0.0595934	0.433797	0.100442	0.43586	0.59653	0.0816424	0.0555802	0.620112	0.126862	0.0849884
Acetylcholine Regulates Insulin Secretion	348	10	73871	77.203	90	0.0666083	0.0381927	8.71578	77.7778	PLCB1 (4.91 %) CHRM3 (3.27 %) PLCB3 (3.27 %) GNAQ (2.25 %) PLCB2 (2.25 %) GNA14 (1.84 %) PRKCA (1.64 %) GNA11 (1.43 %) GNA15 (1.23 %) MARCKS (0.82 %)	0.0139916	0.0555425	0.258463	0.0139916	0.339067	0.0391365	0.0406397	0.0488651	0.0488651	0.0607036	0.396911	0.0672979	0.131428	0.0752948	0.117722	0.158862	0.14358	0.564192	0.0925053	0.0488651	0.722582	0.146258	0.0817866	0.0910834	0.435733	0.065105	0.0803479	0.0939249	0.0953424	0.0760183	0.519016	0.127339	0.521269	0.688993	0.103801	0.0709414	0.712185	0.160178	0.108
Cyclin B2 Mediated Events	149	5	18210	24.4938	33	0.129458	0.040748	9.23968	87.8788	CDC25A (2.2 %) CDC25B (1.8 %) CDK1 (1.4 %) CDC25C (1.2 %) CCNB2 (1.0 %)	0.00346742	0.013988	0.0710629	0.00346742	0.0970434	0.00979316	0.0101752	0.0122741	0.0122741	0.015319	0.117201	0.0170276	0.0341382	0.0191119	0.0304033	0.0417496	0.0374872	0.185141	0.0236442	0.0122741	0.271002	0.0382299	0.020814	0.0232673	0.131563	0.0164584	0.020436	0.0240209	0.0243975	0.0193012	0.165086	0.0330192	0.166052	0.250171	0.026654	0.0179756	0.26436	0.0421194	0.0277803
Direct P53 Effectors	152	141	809720	292.896	309	0.0232457	0.0465711	10.4932	36.246	RB1 (20.65 %) MLH1 (11.25 %) TRRAP (10.84 %) MET (10.02 %) EP300 ( 9.20 %) VCAN ( 8.59 %) MSH2 ( 7.36 %) SMARCA4 ( 6.95 %) NLRC4 ( 5.32 %) APAF1 ( 5.11 %) HTT ( 4.50 %) MAP4K4 ( 4.50 %) PRDM1 ( 4.50 %) TP63 ( 4.29 %) COL18A1 ( 3.89 %) TSC2 ( 3.48 %) BAX ( 3.27 %) POU4F2 ( 3.27 %) BCL6 ( 3.07 %) MMP2 ( 3.07 %) DROSHA ( 2.86 %) TP53BP2 ( 2.86 %) CEBPZ ( 2.66 %) HGF ( 2.66 %) PML ( 2.25 %) EPHA2 ( 2…	0.128952	0.428737	0.946598	0.128952	0.982706	0.323732	0.334027	0.38791	0.38791	0.458599	0.99295	0.494711	0.748569	0.535593	0.706885	0.816411	0.780992	0.999708	0.613673	0.38791	0.999997	0.787609	0.566569	0.607701	0.996327	0.482949	0.559869	0.619554	0.625346	0.539141	0.999232	0.736728	0.999266	0.999989	0.658289	0.513721	0.999995	0.819206	0.673658
Dual Incision In TC NER// Gap Filling DNA Repair Synthesis And Ligation In TC NER	311	66	383582	196.461	212	0.0330604	0.0489078	10.9504	53.7736	LIG1 (11.45 %) EP300 ( 9.20 %) POLE ( 7.57 %) ERCC6 ( 6.34 %) ERCC5 ( 5.32 %) USP7 ( 4.29 %) ERCC3 ( 3.89 %) POLD1 ( 3.89 %) RFC1 ( 3.68 %) LIG3 ( 3.27 %) DDB1 ( 3.07 %) POLR2A ( 3.07 %) ERCC4 ( 2.86 %) POLD3 ( 2.86 %) XAB2 ( 2.45 %) POLK ( 2.25 %) AQR ( 2.04 %) RPA1 ( 2.04 %) XRCC1 ( 2.04 %) CUL4B ( 1.84 %) ERCC2 ( 1.84 %) CUL4A ( 1.64 %) UVSSA ( 1.64 %) CCNH ( 1.43 %) RFC4 ( 1.43 %) RFC5 ( 1.43…	0.0596699	0.220821	0.729012	0.0596699	0.836039	0.159971	0.165694	0.19648	0.19648	0.239243	0.890084	0.262289	0.45949	0.289511	0.421249	0.530169	0.491742	0.973391	0.345467	0.19648	0.996297	0.498644	0.311034	0.340978	0.917797	0.254686	0.306308	0.349926	0.354355	0.291935	0.959068	0.448291	0.959899	0.993901	0.380301	0.27479	0.995652	0.533369	0.392881
MTOR Signalling	84	16	81517	82.9268	95	0.0590288	0.0511544	11.3819	83.1579	MTOR (7.98 %) RPTOR (4.50 %) AKT1 (2.25 %) RRAGB (1.64 %) RRAGD (1.43 %) RHEB (1.23 %) RRAGC (1.02 %) AKT1S1 (0.82 %) LAMTOR5 (0.61 %) YWHAB (0.61 %) LAMTOR2 (0.41 %) MLST8 (0.41 %) LAMTOR1 (0.20 %) LAMTOR3 (0.20 %) LAMTOR4 (0.20 %) RRAGA (0.20 %)	0.0154286	0.0611122	0.281063	0.0154286	0.366797	0.0430988	0.0447506	0.0537844	0.0537844	0.0667723	0.427666	0.0739995	0.144003	0.0827568	0.129086	0.173789	0.15721	0.600092	0.101577	0.0537844	0.757062	0.160117	0.0898602	0.100024	0.468184	0.0715967	0.0882864	0.103128	0.104676	0.0835488	0.554108	0.139555	0.556413	0.724407	0.113909	0.0779904	0.746995	0.175216	0.11849
Class IB PI3K Non Lipid Kinase Events	18	5	36296	40.5058	50	0.0914531	0.0525226	11.6137	92	PIK3CG (6.95 %) PDE3B (2.04 %) PIK3R6 (1.43 %) MAPK1 (0.61 %)	0.00618702	0.0248556	0.123405	0.00618702	0.166727	0.0174306	0.018108	0.0218249	0.0218249	0.0272063	0.199673	0.0302203	0.0601757	0.0338915	0.0536725	0.073368	0.0659904	0.306374	0.041853	0.0218249	0.431508	0.0672777	0.0368848	0.041192	0.222788	0.0292167	0.0362204	0.0425135	0.0431735	0.0342245	0.275577	0.0582294	0.277074	0.402157	0.0471242	0.0318908	0.42222	0.0740068	0.0490934
Regulation Of Insulin Secretion	372	33	219142	157.61	172	0.0379445	0.0529008	11.6251	52.907	CACNA1E (10.43 %) ITPR1 ( 8.18 %) ITPR3 ( 6.95 %) CACNA1C ( 6.34 %) ITPR2 ( 6.13 %) CACNA1A ( 5.73 %) CACNA1D ( 4.91 %) ABCC8 ( 4.29 %) CACNB2 ( 2.25 %) STXBP1 ( 2.04 %) AHCYL1 ( 1.84 %) CACNA2D2 ( 1.84 %) PRKACG ( 1.84 %) RAPGEF4 ( 1.64 %) SLC25A5 ( 1.64 %) ARL2BP ( 1.43 %) RAPGEF3 ( 1.43 %) SLC2A1 ( 1.43 %) SLC2A2 ( 1.43 %) SYT5 ( 1.23 %) GNAI1 ( 1.02 %) KCNJ11 ( 1.02 %) PRKACB ( 1.02 %) STX1A …	0.0407965	0.155425	0.586851	0.0407965	0.705979	0.111316	0.11542	0.137652	0.137652	0.168995	0.775716	0.186123	0.340663	0.206578	0.309431	0.400341	0.367561	0.91415	0.24944	0.137652	0.977412	0.373388	0.222931	0.245959	0.815763	0.180453	0.219326	0.252906	0.256355	0.208412	0.885088	0.331445	0.886672	0.968333	0.276721	0.195485	0.974817	0.40311	0.286693
Recruitment And ATM Mediated Phosphorylation Of Repair And Signaling Proteins At DNA Double Strand Breaks	326	75	382049	197.065	212	0.0317266	0.0560707	12.2461	55.1887	HERC2 (9.00 %) ABL1 (6.34 %) BRCA1 (6.34 %) CHEK2 (5.73 %) RAD50 (4.70 %) WHSC1 (4.70 %) BAZ1B (4.29 %) EYA1 (3.48 %) MDC1 (3.48 %) BRE (2.86 %) EYA4 (2.86 %) MAPK8 (2.86 %) MRE11A (2.86 %) APBB1 (2.66 %) SMARCA5 (2.45 %) BARD1 (2.25 %) NBN (2.25 %) RNF168 (2.04 %) UIMC1 (1.84 %) EYA2 (1.64 %) FAM175A (1.64 %) KDM4A (1.64 %) KDM4B (1.64 %) PPP5C (1.64 %) RNF8 (1.43 %) UBC (1.43 %) KAT5 (1.23 %) H…	0.0599982	0.221924	0.731013	0.0599982	0.837714	0.160802	0.166551	0.197477	0.197477	0.240423	0.891453	0.263562	0.461375	0.290888	0.423043	0.532179	0.493691	0.973933	0.34704	0.197477	0.996413	0.500605	0.31249	0.342536	0.918955	0.255928	0.307747	0.351514	0.355957	0.293321	0.959804	0.45015	0.960624	0.994075	0.381982	0.276111	0.995784	0.535384	0.394598
Constitutive Signaling By NOTCH1 T(7;9)(NOTCH1:M1580 K2555) Translocation Mutant	270	7	54449	61.3465	72	0.0695427	0.056765	12.3221	83.3333	NOTCH1 (5.9 %) JAG1 (3.1 %) ADAM17 (2.5 %) JAG2 (2.2 %) DLL1 (1.8 %) ADAM10 (1.6 %) DLL4 (1.4 %)	0.0103321	0.0412455	0.19781	0.0103321	0.263044	0.0289977	0.0301176	0.0362538	0.0362538	0.0451101	0.311153	0.0500559	0.0986469	0.056066	0.0881852	0.11972	0.10796	0.457836	0.0690472	0.0362538	0.611363	0.110016	0.060955	0.0679723	0.344121	0.0484101	0.0598707	0.0701209	0.0711934	0.0566104	0.416952	0.095521	0.418967	0.577205	0.0776021	0.0527924	0.600679	0.120735	0.0807898
VEGF And VEGFR Signaling Network// VEGF Binds To VEGFR Leading To Receptor Dimerization	295	10	79590	81.5087	93	0.057279	0.0591649	12.7338	67.7419	FLT1 (6.95 %) KDR (6.54 %) FLT4 (3.68 %) NRP2 (2.86 %) VEGFC (2.86 %) NRP1 (2.04 %) FIGF (1.23 %) VEGFA (1.02 %) PGF (0.61 %) VEGFB (0.61 %)	0.0150667	0.0597116	0.275433	0.0150667	0.35992	0.0421017	0.0437162	0.052547	0.052547	0.0652466	0.420066	0.0723151	0.140851	0.0808819	0.126236	0.170052	0.153796	0.591333	0.0992994	0.052547	0.748798	0.156646	0.0878322	0.0977788	0.460186	0.0699649	0.0862922	0.100817	0.102333	0.0816567	0.545512	0.136492	0.547807	0.715881	0.111372	0.0762189	0.738641	0.171451	0.115858
VEGFR2 Mediated Cell Proliferation	299	21	161672	121.113	134	0.0439151	0.0595471	12.7338	55.9701	ITPR1 (8.18 %) ITPR3 (6.95 %) KDR (6.54 %) ITPR2 (6.13 %) PRKCB (5.11 %) PLCG1 (3.89 %) RASA1 (3.89 %) PRKCD (2.86 %) AHCYL1 (1.84 %) PRKCA (1.64 %) PRKCZ (1.02 %) VEGFA (1.02 %) HRAS (0.82 %) PDPK1 (0.82 %) SRC (0.82 %) SPHK1 (0.61 %) CALM2 (0.20 %) CALM3 (0.20 %)	0.0267622	0.104179	0.437684	0.0267622	0.549424	0.0739799	0.0767668	0.0919456	0.0919456	0.113579	0.622261	0.125521	0.237588	0.139898	0.214259	0.283271	0.257992	0.797897	0.170452	0.0919456	0.915292	0.262451	0.151485	0.167947	0.667678	0.121559	0.148924	0.172948	0.175437	0.141194	0.755634	0.230663	0.757834	0.894444	0.190215	0.132086	0.909074	0.285428	0.197504
NOTCH2 Intracellular Domain Regulates Transcription	281	12	86252	86.345	98	0.0549888	0.0597771	12.7338	65.3061	EP300 (9.20 %) NOTCH2 (6.54 %) RBPJ (3.89 %) MAMLD1 (3.27 %) MAML1 (2.25 %) MAML2 (2.04 %) MAML3 (1.23 %) CREB1 (0.61 %) GZMB (0.61 %) FCER2 (0.41 %) HES1 (0.41 %) HES5 (0.20 %)	0.0163174	0.0645449	0.294712	0.0163174	0.383383	0.0455444	0.0472875	0.0568181	0.0568181	0.0705109	0.44592	0.0781255	0.1517	0.0873477	0.13605	0.182901	0.165542	0.620825	0.10715	0.0568181	0.77623	0.168587	0.0948244	0.105516	0.487337	0.0755943	0.0931682	0.10878	0.110408	0.0881814	0.574543	0.147035	0.57687	0.744285	0.120112	0.0823289	0.766408	0.184393	0.124924
Validated Targets Of C MYC Transcriptional Activation	138	80	453731	213.163	228	0.0292228	0.0600921	12.7338	53.0702	TRRAP (10.84 %) HUWE1 ( 9.41 %) EP300 ( 9.20 %) SMAD3 ( 3.89 %) MMP9 ( 3.48 %) BAX ( 3.27 %) EIF4G1 ( 3.27 %) DDX18 ( 3.07 %) LDHA ( 2.86 %) MTDH ( 2.66 %) NCL ( 2.45 %) CDC25A ( 2.25 %) NBN ( 2.25 %) SUPT3H ( 2.25 %) TAF4B ( 2.25 %) MYCT1 ( 2.04 %) HSP90AA1 ( 1.84 %) IREB2 ( 1.84 %) MTA1 ( 1.84 %) RUVBL1 ( 1.84 %) CCNB1 ( 1.64 %) KIR3DL1 ( 1.64 %) ODC1 ( 1.64 %) TERT ( 1.64 %) UBTF ( 1.64 %) ACT…	0.069166	0.252244	0.781526	0.069166	0.878328	0.183785	0.190259	0.224961	0.224961	0.272799	0.923641	0.298398	0.51166	0.328466	0.471179	0.585218	0.545436	0.985372	0.389671	0.224961	0.99853	0.552619	0.352106	0.384791	0.945566	0.289967	0.346925	0.394512	0.399315	0.331135	0.975841	0.499852	0.976411	0.997371	0.427342	0.312229	0.998227	0.588508	0.440862
TP53 Regulates Transcription Of Genes Involved In G1 Cell Cycle Arrest	133	13	49409	47.558	57	0.078651	0.0637457	13.4281	80.7018	E2F7 (4.91 %) CCNA1 (3.27 %) ZNF385A (1.64 %) CCNE1 (1.23 %) CDK2 (1.02 %) CCNA2 (0.82 %) ARID3A (0.61 %) CCNE2 (0.61 %) CDKN1A (0.41 %) PCBP4 (0.20 %)	0.00750967	0.0301083	0.147833	0.00750967	0.198711	0.0211312	0.0219507	0.0264458	0.0264458	0.0329473	0.237026	0.0365852	0.0726091	0.0410131	0.064809	0.0883964	0.0795735	0.358742	0.0506033	0.0264458	0.496393	0.081114	0.0446207	0.0498078	0.263707	0.0353741	0.0438202	0.0513981	0.0521923	0.0414146	0.323997	0.0702759	0.325693	0.464641	0.0569434	0.0386004	0.486382	0.0891596	0.05931
ATM Pathway	305	34	268496	159.438	173	0.035454	0.0645703	13.5218	56.6474	FANCD2 (7.77 %) ABL1 (6.34 %) BRCA1 (6.34 %) CHEK2 (5.73 %) BLM (4.91 %) RAD50 (4.70 %) TOP3A (3.68 %) MDC1 (3.48 %) MRE11A (2.86 %) RBBP8 (2.86 %) SMC3 (2.45 %) CDC25A (2.25 %) NBN (2.25 %) DCLRE1C (1.84 %) MDM2 (1.84 %) UIMC1 (1.84 %) FAM175A (1.64 %) RAD17 (1.64 %) RNF8 (1.43 %) XRCC4 (1.43 %) CDC25C (1.23 %) CTBP1 (1.23 %) KAT5 (1.23 %) RFWD2 (1.23 %) TRIM28 (0.61 %) YWHAB (0.61 %) BID (0.41 …	0.0415898	0.158255	0.594043	0.0415898	0.713043	0.113397	0.117572	0.140185	0.140185	0.172046	0.782279	0.189446	0.346096	0.210217	0.314492	0.406402	0.373292	0.918237	0.253706	0.140185	0.97905	0.37918	0.226815	0.250176	0.821851	0.183687	0.223157	0.25722	0.260718	0.212079	0.889923	0.336771	0.89147	0.970432	0.281361	0.198954	0.976593	0.409197	0.291465
P53 Dependent G1 DNA Damage Response	160	7	21900	25.5456	33	0.111199	0.0667785	13.9024	93.9394	CCNA1 (3.27 %) CCNE1 (1.23 %) CDK2 (1.02 %) CCNA2 (0.82 %) CCNE2 (0.61 %) CDKN1A (0.41 %)	0.00363449	0.0146582	0.0743624	0.00363449	0.101482	0.0102634	0.0106638	0.0128627	0.0128627	0.0160525	0.122497	0.0178422	0.0357562	0.0200252	0.0318473	0.0437202	0.0392607	0.193155	0.0247712	0.0128627	0.28204	0.0400378	0.0218076	0.0243766	0.137456	0.017246	0.0214118	0.0251657	0.02556	0.0202234	0.172326	0.0345852	0.17333	0.26052	0.0279225	0.0188351	0.275181	0.044107	0.0291016
TP53 Network	182	6	27431	27.4369	35	0.105733	0.0691599	14.3145	100	TP63 (4.29 %) TP73 (1.23 %) MYC (1.02 %) TNFSF10 (0.61 %)	0.0039389	0.0158786	0.0803456	0.0039389	0.109515	0.01112	0.0115535	0.0139347	0.0139347	0.0173879	0.132068	0.019325	0.0386982	0.0216874	0.0344734	0.0473012	0.0424846	0.207557	0.026822	0.0139347	0.301729	0.043324	0.023616	0.0263951	0.148094	0.0186797	0.0231878	0.0272486	0.0276751	0.0219019	0.185359	0.0374327	0.18643	0.279014	0.0302301	0.0203995	0.294496	0.0477189	0.031505
Insulin/IGF Pathway Mitogen Activated Protein Kinase Kinase/MAP Kinase Cascade	70	29	221320	153.954	167	0.0353257	0.0704208	14.4027	55.0898	IGF2R (9.20 %) IRS4 (6.13 %) INSRR (5.93 %) RPS6KA2 (4.91 %) IRS1 (4.50 %) IGF1R (4.29 %) INSR (4.29 %) RASA1 (3.89 %) RPS6KA6 (3.68 %) RPS6KA3 (3.27 %) SOS1 (3.07 %) RAF1 (2.66 %) RPS6KA5 (2.25 %) MAP2K3 (1.84 %) RPS6KA1 (1.84 %) RPS6KB1 (1.64 %) IGF2 (1.43 %) IGF1 (1.23 %) IRS2 (1.23 %) RPS6KA4 (1.23 %) ELK1 (1.02 %) FOS (1.02 %) RPS6KB2 (1.02 %) MAPK1 (0.61 %) MAPK3 (0.61 %) MAP2K2 (0.41 %)	0.0392365	0.149841	0.572355	0.0392365	0.691598	0.107215	0.111177	0.132655	0.132655	0.162972	0.762248	0.179558	0.329861	0.199383	0.299384	0.388257	0.356155	0.90552	0.240991	0.132655	0.973812	0.361857	0.215247	0.237608	0.803195	0.174066	0.211749	0.244359	0.247713	0.201161	0.874968	0.32086	0.876625	0.963767	0.267522	0.188629	0.970927	0.390972	0.27723
AKT(PKB) MTOR Signaling ( Insulin Receptor Signaling (Mammal) )// AKT(PKB) TOR Signaling ( Insulin Receptor Signaling (D. Melanogaster) )	7	15	129227	93.7032	105	0.0494349	0.070697	14.4027	75.2381	MTOR (7.98 %) EIF4G3 (3.68 %) TSC2 (3.48 %) EIF4G1 (3.27 %) AKT1 (2.25 %) AKT3 (1.84 %) EIF4A2 (1.84 %) AKT2 (1.64 %) RPS6KB1 (1.64 %) RHEB (1.23 %) RPS6 (0.61 %)	0.0183109	0.0722093	0.324431	0.0183109	0.41907	0.0510145	0.0529611	0.0635965	0.0635965	0.0788534	0.484825	0.0873258	0.168735	0.0975753	0.151489	0.203	0.183956	0.663558	0.11954	0.0635965	0.813949	0.1873	0.105876	0.11773	0.527878	0.0845104	0.104038	0.121346	0.123149	0.0985014	0.617094	0.163598	0.619445	0.783862	0.133885	0.091999	0.804751	0.204635	0.139204
Stabilization And Expansion Of The E Cadherin Adherens Junction	263	43	335329	194.198	208	0.0298186	0.0708	14.4027	49.0385	CDH1 (17.59 %) MET (10.02 %) ROCK1 ( 5.52 %) CTNNA1 ( 4.91 %) IGF1R ( 4.29 %) CTNND1 ( 3.89 %) EXOC4 ( 3.89 %) EXOC1 ( 3.27 %) MLLT4 ( 3.27 %) NCKAP1 ( 3.07 %) PLEKHA7 ( 3.07 %) LIMA1 ( 2.86 %) ACTN1 ( 2.66 %) HGF ( 2.66 %) MYO6 ( 2.66 %) PIP5K1C ( 2.66 %) RHOA ( 2.45 %) CYFIP2 ( 2.04 %) EPHA2 ( 2.04 %) KIFC3 ( 2.04 %) MGAT3 ( 2.04 %) CAMSAP3 ( 1.84 %) VCL ( 1.64 %) ENAH ( 1.43 %) DIAPH1 ( 1.23 %…	0.0584503	0.216715	0.721455	0.0584503	0.829674	0.15688	0.162504	0.192768	0.192768	0.234848	0.88485	0.257546	0.452439	0.284376	0.414542	0.522632	0.484444	0.971279	0.339597	0.192768	0.995834	0.491298	0.305605	0.335163	0.913355	0.250056	0.300943	0.344002	0.348377	0.286767	0.956217	0.441335	0.957088	0.99321	0.374023	0.269864	0.995124	0.525816	0.386465
Noncanonical Wnt Signaling Pathway	278	33	210070	151.109	164	0.0355526	0.0718238	14.528	53.0488	CHD7 (7.57 %) FLNA (6.13 %) ROCK1 (5.52 %) ROR2 (4.29 %) SETDB1 (3.89 %) MAPK10 (3.48 %) FZD6 (2.86 %) MAPK8 (2.86 %) MAPK9 (2.66 %) FZD7 (2.45 %) NFATC2 (2.45 %) RHOA (2.45 %) DVL2 (2.25 %) NLK (2.25 %) DAAM1 (1.84 %) DVL3 (1.84 %) FZD2 (1.84 %) YES1 (1.84 %) MAP3K7 (1.64 %) WNT5A (1.64 %) TAB2 (1.43 %) CTHRC1 (1.23 %) PRKCZ (1.02 %) CAMK2A (0.82 %) PPARG (0.82 %) WNT3A (0.82 %) CDC42 (0.61 %) C…	0.0380474	0.145565	0.56098	0.0380474	0.68018	0.104081	0.107934	0.128832	0.128832	0.158358	0.751455	0.174524	0.32152	0.193862	0.291638	0.378895	0.347335	0.898374	0.234496	0.128832	0.970692	0.352936	0.209346	0.231189	0.793056	0.16917	0.205931	0.237788	0.241066	0.195597	0.86667	0.312691	0.868383	0.959855	0.26044	0.183371	0.967568	0.381567	0.269941
Downregulation Of SMAD2/3:SMAD4 Transcriptional Activity	153	23	217149	131.99	144	0.0378218	0.0786759	15.8241	66.6667	NCOR2 (6.75 %) USP9X (6.54 %) NCOR1 (6.34 %) SMAD3 (3.89 %) TRIM33 (3.89 %) TGIF1 (3.48 %) PARP1 (3.07 %) RNF111 (3.07 %) NEDD4L (2.66 %) SKIL (1.84 %) PPM1A (1.43 %) SMURF2 (1.43 %) UBC (1.43 %) HDAC1 (1.02 %) SKI (0.82 %) TGIF2 (0.82 %) UBA52 (0.61 %) UBE2D1 (0.20 %) UBE2D3 (0.20 %)	0.0305961	0.118404	0.482868	0.0305961	0.598773	0.0842782	0.0874345	0.1046	0.1046	0.128994	0.672153	0.142422	0.267095	0.158553	0.241348	0.317176	0.289519	0.839848	0.192704	0.1046	0.940853	0.294408	0.171526	0.189912	0.716897	0.137969	0.168661	0.195486	0.198259	0.160005	0.800934	0.259464	0.802985	0.923898	0.214697	0.149792	0.935854	0.31953	0.222789
Signaling Events Mediated By Focal Adhesion Kinase	125	63	486599	232.516	246	0.0244822	0.0821504	16.4301	50	MAP2K4 (6.95 %) MYLK (6.13 %) DOCK1 (5.52 %) ELMO1 (5.11 %) ARHGEF7 (4.50 %) ARHGAP35 (4.29 %) ARHGEF11 (4.29 %) TLN1 (4.29 %) PTK2 (4.09 %) PLCG1 (3.89 %) RAPGEF1 (3.89 %) RASA1 (3.89 %) ACTN2 (3.68 %) FYN (3.48 %) ITGA5 (3.48 %) ITGAV (3.27 %) WASL (3.27 %) ASAP1 (3.07 %) SOS1 (3.07 %) MAPK8 (2.86 %) ACTA1 (2.66 %) ACTN1 (2.66 %) MAPK9 (2.66 %) PAK1 (2.66 %) RAF1 (2.66 %) ITGB1 (2.45 %) MAPK8IP…	0.0813215	0.291063	0.834709	0.0813215	0.917317	0.213624	0.221001	0.260351	0.260351	0.314066	0.952359	0.342548	0.571811	0.375758	0.529494	0.647036	0.606632	0.993259	0.442509	0.260351	0.999555	0.613977	0.401678	0.43723	0.968082	0.333188	0.396013	0.447738	0.452919	0.378692	0.987795	0.559532	0.988135	0.999116	0.482996	0.357857	0.999445	0.650347	0.497408
Downstream Signaling In NaÃ¯ve CD8+ T Cells	25	69	304446	173.446	186	0.0303479	0.0852524	16.9552	62.3656	PRKCB (5.11 %) B2M (3.68 %) HLA-A (3.68 %) CD3G (3.27 %) PRKCQ (3.27 %) NFATC3 (3.07 %) EOMES (2.86 %) MAPK8 (2.86 %) MAPK9 (2.66 %) NFATC1 (2.66 %) RAF1 (2.66 %) EGR1 (2.45 %) NFATC2 (2.45 %) STAT4 (2.25 %) IFNA2 (2.04 %) TNFRSF9 (2.04 %) IL2RG (1.84 %) IFNA1 (1.64 %) IFNAR1 (1.64 %) PRKCA (1.64 %) PRF1 (1.43 %) IL2RB (1.23 %) PRKCE (1.23 %) CD3D (1.02 %) ELK1 (1.02 %) FOS (1.02 %) IFNA10 (1.02 …	0.047972	0.180757	0.64771	0.047972	0.764202	0.130023	0.134763	0.16037	0.16037	0.19627	0.828698	0.215786	0.388358	0.238995	0.354019	0.453153	0.4177	0.944853	0.287278	0.16037	0.988594	0.424026	0.257473	0.283374	0.864187	0.209334	0.253406	0.29116	0.295022	0.241071	0.922201	0.378252	0.923466	0.983006	0.317752	0.226422	0.987032	0.456132	0.328841
Angiogenesis	8	141	980324	320.265	333	0.0169342	0.0885475	17.5127	31.2312	PDGFRA (10.43 %) EPHB1 ( 8.59 %) MAP2K4 ( 6.95 %) PIK3CG ( 6.95 %) KDR ( 6.54 %) NOTCH2 ( 6.54 %) NOTCH1 ( 5.93 %) TEK ( 5.93 %) PRKD1 ( 5.73 %) PIK3C3 ( 5.32 %) PRKCB ( 5.11 %) PIK3C2A ( 4.70 %) PRKCG ( 4.70 %) PIK3C2B ( 4.50 %) PLCG2 ( 4.50 %) PRKCI ( 4.50 %) NOS3 ( 4.29 %) JAK1 ( 4.09 %) PDGFRB ( 4.09 %) PTK2 ( 4.09 %) FGFR1 ( 3.89 %) PLCG1 ( 3.89 %) PTPRB ( 3.89 %) RASA1 ( 3.89 %) RBPJ ( 3.89…	0.157007	0.499763	0.973342	0.157007	0.993392	0.383639	0.395226	0.455167	0.455167	0.53191	0.997823	0.570224	0.818765	0.612821	0.780891	0.877175	0.84722	0.999958	0.691673	0.455167	1	0.85291	0.644513	0.685766	0.999028	0.557815	0.637702	0.697469	0.703156	0.616477	0.99986	0.808148	0.999867	0.999999	0.735103	0.590138	1	0.879484	0.749763
DNA Replication Initiation// Telomere C Strand Synthesis Initiation	209	6	38730	46.7823	55	0.0702807	0.0918673	18.0689	80	POLE (7.57 %) POLA1 (2.45 %) POLA2 (1.23 %) PRIM2 (1.02 %) POLE2 (0.82 %) PRIM1 (0.82 %)	0.00736029	0.0295161	0.145107	0.00736029	0.195159	0.0207137	0.0215172	0.0259247	0.0259247	0.0323002	0.232893	0.0358681	0.0712123	0.0402109	0.0635571	0.0867104	0.0780485	0.353028	0.0496185	0.0259247	0.489448	0.0795608	0.0437496	0.048838	0.259193	0.0346803	0.0429644	0.0503982	0.0511774	0.0406048	0.318692	0.0689224	0.320367	0.457921	0.0558389	0.0378445	0.479504	0.0874597	0.058161
Polo Like Kinase Signaling Events In The Cell Cycle	105	4	17489	23.6234	30	0.103778	0.0938832	18.364	86.6667	PLK1 (2.86 %) PLK4 (2.04 %) PLK2 (1.64 %) PLK3 (0.61 %)	0.00333036	0.0134379	0.0683477	0.00333036	0.0933865	0.00940725	0.00977435	0.011791	0.011791	0.0147169	0.112833	0.016359	0.0328089	0.0183622	0.0292173	0.0401303	0.03603	0.178509	0.0227187	0.011791	0.261821	0.0367444	0.0199982	0.0223564	0.126699	0.0158119	0.0196349	0.0230809	0.0234429	0.0185441	0.1591	0.0317328	0.160035	0.241575	0.0256123	0.0172701	0.255363	0.040486	0.0266952
FGFR3b Ligand Binding And Activation	54	7	23012	30.1207	37	0.0893361	0.0970717	18.8839	86.4865	FGFR3 (4.70 %) FGF20 (1.02 %) FGF8 (0.82 %) FGF1 (0.61 %) FGF17 (0.61 %) FGF18 (0.61 %) FGF9 (0.20 %)	0.00437978	0.0176439	0.0889457	0.00437978	0.121026	0.0123596	0.0128412	0.0154856	0.0154856	0.0193194	0.145749	0.0214693	0.0429446	0.0240906	0.0382655	0.0524656	0.0471363	0.227969	0.0297855	0.0154856	0.329301	0.0480653	0.0262301	0.0293122	0.163274	0.0207532	0.0257551	0.0302586	0.0307314	0.0243286	0.20388	0.0415433	0.205044	0.304992	0.0335636	0.0226617	0.32157	0.0529276	0.0349766
P130Cas Linkage To MAPK Signaling For Integrins	90	15	117924	93.4555	103	0.0422323	0.107943	20.8846	67.9612	VWF (6.54 %) FGA (4.50 %) TLN1 (4.29 %) PTK2 (4.09 %) APBB1IP (3.89 %) ITGB3 (2.66 %) ITGA2B (2.04 %) FGG (1.43 %) FGB (1.23 %) BCAR1 (1.02 %) SRC (0.82 %) RAP1A (0.41 %) RAP1B (0.41 %)	0.018242	0.0719452	0.323424	0.018242	0.41787	0.0508257	0.0527654	0.0633628	0.0633628	0.0785659	0.483525	0.087009	0.168151	0.0972233	0.150959	0.202313	0.183325	0.662163	0.119114	0.0633628	0.812757	0.18666	0.105495	0.11731	0.52653	0.0842033	0.103664	0.120914	0.122711	0.0981462	0.615695	0.16303	0.618046	0.782601	0.133412	0.0916661	0.803536	0.203943	0.138714
EGFR1	30	475	3242934	447.783	455	0.006944	0.11055	21.2734	16.044	KIT (22.90 %) CDH1 (17.59 %) MET (10.02 %) JAK2 ( 9.82 %) HUWE1 ( 9.41 %) ARHGAP5 ( 9.00 %) AHNAK ( 8.59 %) EPHB1 ( 8.59 %) CBL ( 7.98 %) MTOR ( 7.98 %) ERBB2 ( 7.36 %) PTPRK ( 7.16 %) STK11 ( 7.16 %) PIK3CG ( 6.95 %) MCF2 ( 6.75 %) FLNB ( 6.54 %) TNS1 ( 6.54 %) ABL1 ( 6.34 %) CDH2 ( 6.34 %) MYH9 ( 6.34 %) ERBB3 ( 5.93 %) PRKD1 ( 5.73 %) WNK1 ( 5.73 %) DOCK1 ( 5.52 %) DSP ( 5.52 %) IQGAP1 ( 5.52 …	0.439661	0.904538	0.999995	0.439661	1	0.806234	0.818311	0.872472	0.872472	0.923791	1	0.942953	0.996949	0.959959	0.994192	0.999184	0.99829	1	0.981503	0.872472	1	0.998497	0.970027	0.980273	1	0.937172	0.968034	0.982656	0.983737	0.961227	1	0.996299	1	1	0.988946	0.951431	1	0.999235	0.990887
Signaling Events Mediated By VEGFR1 And VEGFR2	126	69	490534	229.178	241	0.0218441	0.112031	21.4425	50.6224	CBL (7.98 %) FLT1 (6.95 %) KDR (6.54 %) IQGAP1 (5.52 %) ROCK1 (5.52 %) PRKCB (5.11 %) CTNNA1 (4.91 %) NOS3 (4.29 %) PTK2 (4.09 %) PLCG1 (3.89 %) FYN (3.48 %) MYOF (3.48 %) DNM2 (3.27 %) GAB1 (3.27 %) ITGAV (3.27 %) PTPRJ (3.27 %) NEDD4 (3.07 %) FBXW11 (2.86 %) PRKCD (2.86 %) ITGB3 (2.66 %) RAF1 (2.66 %) VTN (2.66 %) HGS (2.45 %) RHOA (2.45 %) AKT1 (2.25 %) DAG1 (2.25 %) GRB2 (2.25 %) PAK2 (2.25 %…	0.0791316	0.284184	0.826143	0.0791316	0.911324	0.208302	0.21552	0.254063	0.254063	0.306769	0.948109	0.334762	0.561494	0.367446	0.519431	0.636566	0.596194	0.992244	0.43329	0.254063	0.999448	0.603524	0.392989	0.428075	0.964842	0.325559	0.387404	0.438457	0.443577	0.370337	0.986188	0.549277	0.986562	0.998923	0.473333	0.349823	0.999315	0.63988	0.487608
Insulin Signalling	364	17	113299	101.453	111	0.0390601	0.113643	21.6347	64.8649	PIK3CG (6.95 %) IRS1 (4.50 %) INSR (4.29 %) SOS1 (3.07 %) RAF1 (2.66 %) SHC1 (2.45 %) AKT1 (2.25 %) GRB2 (2.25 %) SLC2A4 (1.64 %) PIK3R6 (1.43 %) IRS2 (1.23 %) HRAS (0.82 %) PDPK1 (0.82 %) MAPK1 (0.61 %) MAP2K2 (0.41 %)	0.0205324	0.0806946	0.356142	0.0205324	0.456488	0.0570863	0.0592573	0.0711089	0.0711089	0.0880816	0.525054	0.0974921	0.187355	0.108862	0.168405	0.224863	0.20404	0.705615	0.133174	0.0711089	0.848609	0.207701	0.118058	0.131174	0.569376	0.0943661	0.116023	0.13517	0.137161	0.109888	0.659603	0.181716	0.661949	0.820866	0.149013	0.102678	0.840182	0.226648	0.154878
Hedgehog Signaling Events Mediated By Gli Proteins	253	49	370263	202.63	214	0.0237096	0.11654	22.0683	47.6636	PTCH1 (20.65 %) GLI3 ( 7.77 %) GLI2 ( 4.91 %) GLI1 ( 4.09 %) IFT172 ( 4.09 %) SIN3A ( 4.09 %) GSK3B ( 3.27 %) RBBP7 ( 3.27 %) CSNK1D ( 2.86 %) FBXW11 ( 2.86 %) IFT88 ( 2.86 %) PRKCD ( 2.86 %) SMO ( 2.66 %) KIF3A ( 2.45 %) STK36 ( 2.45 %) AKT1 ( 2.25 %) MTSS1 ( 2.25 %) SIN3B ( 2.25 %) GNAO1 ( 2.04 %) BTRC ( 1.84 %) XPO1 ( 1.84 %) CSNK1E ( 1.64 %) CSNK1G3 ( 1.43 %) FOXA2 ( 1.23 %) HDAC2 ( 1.23 %) P…	0.0630752	0.232202	0.749093	0.0630752	0.852621	0.168561	0.174559	0.206778	0.206778	0.251411	0.903503	0.275404	0.478748	0.303688	0.439615	0.550637	0.511626	0.978514	0.361623	0.206778	0.997338	0.518646	0.326005	0.356985	0.929059	0.267493	0.321108	0.366228	0.370799	0.306203	0.966098	0.467304	0.966827	0.995485	0.397543	0.2884	0.996845	0.553878	0.410486
Cell Division	15	4	17951	24.1819	30	0.0936302	0.117579	22.1471	83.3333	PLK1 (2.86 %) KIF23 (1.84 %) KIF20A (1.64 %) NUDC (0.82 %)	0.00341819	0.0137904	0.0700885	0.00341819	0.0957314	0.00965455	0.0100313	0.0121006	0.0121006	0.0151028	0.115635	0.0167875	0.0336609	0.0188427	0.0299774	0.0411682	0.036964	0.182765	0.0233118	0.0121006	0.267717	0.0376965	0.020521	0.0229402	0.129819	0.0162262	0.0201483	0.0236834	0.0240547	0.0190293	0.16294	0.0325573	0.163895	0.247094	0.02628	0.0177222	0.26114	0.041533	0.0273907
Growth Hormone Receptor Signaling	63	24	134759	116.28	126	0.0348653	0.118898	22.2777	69.0476	JAK2 (9.82 %) IRS1 (4.50 %) STAT5B (3.89 %) STAT1 (3.27 %) ADAM17 (2.45 %) LYN (2.04 %) PRLR (2.04 %) STAT3 (2.04 %) GHR (1.84 %) PTPN1 (1.84 %) STAT5A (1.84 %) IRS2 (1.23 %) GH1 (1.02 %) PRL (0.82 %) PTPN6 (0.82 %) SH2B1 (0.82 %) SOCS3 (0.82 %) GH2 (0.61 %) MAPK1 (0.61 %) MAPK3 (0.61 %) CISH (0.41 %) SOCS2 (0.41 %) CSH1 (0.20 %)	0.0251492	0.098142	0.41757	0.0251492	0.526952	0.0696247	0.0722541	0.0865831	0.0865831	0.107031	0.59913	0.118331	0.224857	0.131949	0.202607	0.268549	0.244351	0.777174	0.160934	0.0865831	0.901514	0.248616	0.142934	0.158556	0.64456	0.114581	0.140505	0.163305	0.16567	0.133176	0.733683	0.218248	0.735934	0.878913	0.179717	0.124547	0.894741	0.270616	0.186652
VEGFR2 Mediated Vascular Permeability	300	29	207985	146.751	157	0.0293178	0.122131	22.7636	57.3248	MTOR (7.98 %) VAV3 (5.52 %) CTNNA1 (4.91 %) RICTOR (4.50 %) NOS3 (4.29 %) VAV1 (4.29 %) CTNND1 (3.89 %) VAV2 (3.89 %) PAK3 (3.68 %) PAK1 (2.66 %) AKT1 (2.25 %) PAK2 (2.25 %) AKT3 (1.84 %) HSP90AA1 (1.84 %) JUP (1.84 %) AKT2 (1.64 %) CDH5 (1.64 %) MAPKAP1 (1.23 %) PDPK1 (0.82 %) TRIB3 (0.82 %) PRR5 (0.61 %) THEM4 (0.61 %) CAV1 (0.41 %) MLST8 (0.41 %) RAC1 (0.41 %) CALM2 (0.20 %) CALM3 (0.20 %)	0.0362666	0.139133	0.543407	0.0362666	0.662316	0.0993739	0.103063	0.123084	0.123084	0.151411	0.734398	0.166941	0.308855	0.185536	0.279897	0.364631	0.333921	0.886669	0.22468	0.123084	0.96532	0.339366	0.200442	0.221491	0.776914	0.161796	0.197153	0.227856	0.231019	0.187206	0.853226	0.300292	0.855022	0.953204	0.249725	0.175446	0.961808	0.367233	0.258907
Frs2 Mediated Activation	57	9	58465	55.6642	63	0.0537643	0.132866	24.6355	87.3016	PLCG1 (3.89 %) RAPGEF1 (3.89 %) NTRK1 (2.86 %) NGF (1.23 %) CRKL (1.02 %) FRS2 (1.02 %) YWHAB (0.61 %) RAP1A (0.41 %)	0.00912999	0.0365139	0.176876	0.00912999	0.236279	0.0256524	0.0266448	0.0320853	0.0320853	0.0399444	0.280479	0.0443371	0.0876387	0.0496787	0.0782933	0.106502	0.0959686	0.417621	0.0612296	0.0320853	0.565971	0.0978093	0.0540268	0.0602724	0.310978	0.0428751	0.0530623	0.0621858	0.0631411	0.0501628	0.379004	0.0848451	0.3809	0.532451	0.0688521	0.0467688	0.555451	0.107412	0.0716946
MTORC1 Mediated Signalling	85	22	118319	97.866	106	0.0346739	0.150699	27.678	70.7547	MTOR (7.98 %) RPTOR (4.50 %) EIF4G1 (3.27 %) EEF2K (2.45 %) RPS6KB1 (1.64 %) RRAGB (1.64 %) RRAGD (1.43 %) RHEB (1.23 %) EIF4B (1.02 %) RRAGC (1.02 %) AKT1S1 (0.82 %) LAMTOR5 (0.61 %) RPS6 (0.61 %) YWHAB (0.61 %) LAMTOR2 (0.41 %) MLST8 (0.41 %) LAMTOR1 (0.20 %) LAMTOR3 (0.20 %) LAMTOR4 (0.20 %) RRAGA (0.20 %)	0.0194884	0.0767142	0.34142	0.0194884	0.439203	0.054236	0.0563019	0.0675839	0.0675839	0.0837537	0.506544	0.0927257	0.178651	0.103572	0.160493	0.214658	0.194658	0.686536	0.126789	0.0675839	0.833198	0.198173	0.11235	0.124878	0.550337	0.0897448	0.110407	0.128697	0.1306	0.104552	0.640236	0.173245	0.642588	0.804328	0.141933	0.0976721	0.824403	0.216374	0.147543
Class I PI3K Signaling Events Mediated By Akt	17	35	235572	163.593	173	0.0242814	0.15083	27.678	53.7572	PRKDC (14.11 %) MTOR ( 7.98 %) CHUK ( 4.70 %) RICTOR ( 4.50 %) TBC1D4 ( 3.48 %) GSK3B ( 3.27 %) MAP3K5 ( 2.86 %) RAF1 ( 2.66 %) FOXO4 ( 2.45 %) AKT1 ( 2.25 %) AKT3 ( 1.84 %) HSP90AA1 ( 1.84 %) AKT2 ( 1.64 %) FOXO1 ( 1.64 %) KPNA1 ( 1.64 %) SLC2A4 ( 1.64 %) CASP9 ( 1.43 %) GSK3A ( 1.23 %) MAPKAP1 ( 1.23 %) YWHAH ( 1.02 %) FOXO3 ( 0.82 %) PDPK1 ( 0.82 %) SRC ( 0.82 %) YWHAE ( 0.82 %) YWHAB ( 0.61 %…	0.0434266	0.164778	0.610238	0.0434266	0.728773	0.118203	0.122542	0.14603	0.14603	0.179075	0.796764	0.197098	0.35852	0.218589	0.326082	0.420219	0.386377	0.926978	0.263504	0.14603	0.982406	0.392402	0.235744	0.259862	0.835203	0.191134	0.231965	0.267128	0.270734	0.220514	0.900362	0.348956	0.901826	0.974779	0.292003	0.206939	0.980243	0.423073	0.302404
Glucagon Like Peptide 1 (GLP1) Regulates Insulin Secretion	354	42	248056	159.506	168	0.0225336	0.174887	31.928	57.7381	ITPR1 (8.18 %) ITPR3 (6.95 %) ADCY8 (6.13 %) ITPR2 (6.13 %) IQGAP1 (5.52 %) ADCY5 (5.32 %) KCNS3 (4.50 %) KCNB1 (3.68 %) KCNC2 (3.07 %) ADCY6 (2.25 %) KCNG2 (1.84 %) PRKACG (1.84 %) GLP1R (1.64 %) GNB4 (1.64 %) RAPGEF4 (1.64 %) GNG12 (1.43 %) RAPGEF3 (1.43 %) GNB3 (1.23 %) PRKAR1A (1.23 %) AKAP5 (1.02 %) GCG (1.02 %) PRKACB (1.02 %) PRKAR2B (1.02 %) PRKAR2A (0.82 %) GNB1 (0.61 %) GNB5 (0.61 %) GN…	0.0416193	0.158359	0.594307	0.0416193	0.713302	0.113475	0.117652	0.140279	0.140279	0.172159	0.782519	0.189569	0.346297	0.210352	0.314679	0.406626	0.373503	0.918385	0.253864	0.140279	0.979109	0.379394	0.226959	0.250332	0.822073	0.183807	0.223299	0.25738	0.26088	0.212214	0.890098	0.336968	0.891644	0.970507	0.281532	0.199083	0.976656	0.409422	0.291641
NOTCH1 Intracellular Domain Regulates Transcription	279	47	337216	188.312	197	0.0195887	0.179858	32.6681	55.8376	EP300 (9.20 %) NCOR2 (6.75 %) NCOR1 (6.34 %) NOTCH1 (5.93 %) HDAC9 (5.32 %) RBPJ (3.89 %) MAMLD1 (3.27 %) HDAC4 (2.86 %) TLE4 (2.86 %) HDAC5 (2.45 %) HIF1A (2.45 %) KAT2B (2.45 %) TBL1XR1 (2.45 %) MAML1 (2.25 %) HDAC7 (2.04 %) MAML2 (2.04 %) SNW1 (2.04 %) TBL1X (1.64 %) TLE3 (1.64 %) CDK8 (1.43 %) HDAC6 (1.43 %) HEY1 (1.43 %) HEY2 (1.43 %) TLE1 (1.43 %) UBC (1.43 %) HDAC11 (1.23 %) HDAC2 (1.23 %)…	0.0553499	0.206202	0.701328	0.0553499	0.812396	0.14899	0.154358	0.183277	0.183277	0.223586	0.870431	0.245379	0.434139	0.271186	0.397182	0.50297	0.465459	0.965137	0.32447	0.183277	0.994381	0.472181	0.291643	0.320183	0.900979	0.238184	0.287147	0.328731	0.332964	0.273488	0.948064	0.423296	0.949041	0.991083	0.357811	0.257221	0.99348	0.506105	0.369885
Packaging Of Telomere Ends	213	50	77184	70.5154	77	0.038207	0.183148	33.0967	80.5195	TERF1 (1.43 %) HIST2H2AC (1.23 %) POT1 (1.23 %) HIST1H2BA (1.02 %) HIST1H4L (1.02 %) ACD (0.82 %) HIST1H2BD (0.82 %) HIST1H2BL (0.82 %) HIST1H4I (0.82 %) TERF2IP (0.82 %) HIST1H2AB (0.61 %) HIST1H2AC (0.61 %) HIST1H2BB (0.61 %) HIST1H2BC (0.61 %) HIST1H2BG (0.61 %) HIST1H2BM (0.61 %) HIST1H4D (0.61 %) HIST4H4 (0.61 %) H2AFB1 (0.41 %) H2AFZ (0.41 %) HIST1H2BF (0.41 %) HIST1H2BH (0.41 %) HIST1H4B (…	0.0123919	0.0493126	0.232507	0.0123919	0.306816	0.0347129	0.0360494	0.0433669	0.0433669	0.0539115	0.360782	0.0597917	0.117232	0.066929	0.104917	0.141952	0.128171	0.520493	0.0823137	0.0433669	0.678484	0.130584	0.0727283	0.0810414	0.397334	0.0578357	0.0714426	0.0835843	0.0848531	0.0675751	0.476758	0.113555	0.478928	0.644264	0.0924291	0.0630427	0.667843	0.14314	0.0961935
Regulation Of Nuclear SMAD2/3 Signaling	235	82	546880	234.115	243	0.0161777	0.184167	33.1129	49.7942	EP300 (9.20 %) NCOR1 (6.34 %) AR (5.32 %) COL1A2 (5.32 %) LAMC1 (4.70 %) NCOA2 (4.50 %) ESR1 (4.29 %) SIN3A (4.09 %) SMAD3 (3.89 %) RBL1 (3.68 %) TGIF1 (3.48 %) MEF2C (3.27 %) RBBP7 (3.27 %) NCOA1 (3.07 %) FOXO4 (2.45 %) KAT2B (2.45 %) AKT1 (2.25 %) SIN3B (2.25 %) SP3 (2.25 %) TFE3 (2.25 %) HNF4A (2.04 %) HSPA8 (2.04 %) NR3C1 (2.04 %) PIAS3 (2.04 %) TFDP1 (2.04 %) FOXG1 (1.84 %) RUNX2 (1.84 %) SE…	0.0823845	0.294384	0.838721	0.0823845	0.920083	0.2162	0.223652	0.263389	0.263389	0.317586	0.954298	0.346301	0.57674	0.37976	0.534312	0.652018	0.61161	0.993704	0.446938	0.263389	0.9996	0.61896	0.405858	0.441629	0.969548	0.336866	0.400155	0.452196	0.457404	0.382716	0.988507	0.564434	0.988832	0.999196	0.48763	0.361728	0.999499	0.655327	0.502106
BCR	10	161	1021557	328.589	337	0.0109768	0.189358	33.8752	31.7507	RB1 (20.65 %) CARD11 (10.63 %) ITPR1 ( 8.18 %) CBL ( 7.98 %) PIK3CG ( 6.95 %) ITPR2 ( 6.13 %) CHST15 ( 5.93 %) PRKD1 ( 5.73 %) PTPRC ( 5.73 %) PRKCB ( 5.11 %) ITK ( 4.91 %) CHUK ( 4.70 %) ATP2B4 ( 4.50 %) PLCG2 ( 4.50 %) VAV1 ( 4.29 %) CR2 ( 4.09 %) PTK2 ( 4.09 %) PLCG1 ( 3.89 %) RAPGEF1 ( 3.89 %) RASA1 ( 3.89 %) VAV2 ( 3.89 %) CD22 ( 3.48 %) FYN ( 3.48 %) BANK1 ( 3.27 %) BAX ( 3.27 %) CBLB ( 3.2…	0.166621	0.522501	0.979102	0.166621	0.995283	0.403349	0.415311	0.47694	0.47694	0.555175	0.998557	0.593921	0.838406	0.636725	0.802131	0.89331	0.865331	0.999978	0.7151	0.47694	1	0.870677	0.668367	0.709271	0.99939	0.581396	0.661583	0.720812	0.726409	0.640384	0.999923	0.828284	0.999927	1	0.757713	0.613969	1	0.895449	0.771995
LPA Receptor Mediated Events	255	65	467078	229.364	238	0.0160521	0.190704	33.9454	50	TIAM1 (6.95 %) ADCY2 (6.34 %) ADCY8 (6.13 %) PRKD1 (5.73 %) ADCY5 (5.32 %) ADCY1 (4.91 %) PTK2 (4.09 %) ADCY9 (3.89 %) PLCG1 (3.89 %) MMP9 (3.48 %) GAB1 (3.27 %) GSK3B (3.27 %) PLCB3 (3.27 %) ARHGEF1 (3.07 %) MMP2 (3.07 %) PRKCD (2.86 %) ADCY4 (2.66 %) ADCY7 (2.45 %) LPAR3 (2.45 %) MAPT (2.45 %) RHOA (2.45 %) ADCY6 (2.25 %) AKT1 (2.25 %) GNAQ (2.25 %) GNAO1 (2.04 %) LYN (2.04 %) NFKB1 (2.04 %) PT…	0.0792525	0.284565	0.826626	0.0792525	0.911665	0.208596	0.215823	0.254411	0.254411	0.307173	0.948353	0.335194	0.562069	0.367907	0.519991	0.637151	0.596776	0.992304	0.433802	0.254411	0.999455	0.604107	0.393472	0.428584	0.965029	0.325982	0.387881	0.438973	0.444096	0.3708	0.986282	0.549848	0.986654	0.998934	0.47387	0.350268	0.999323	0.640465	0.488153
TGF Beta Receptor Signaling In EMT (epithelial To Mesenchymal Transition)	179	16	72730	68.8079	75	0.0374232	0.192886	34.1629	73.3333	TGFBR1 (3.48 %) ARHGEF18 (3.07 %) CGN (2.66 %) RHOA (2.45 %) PARD3 (2.04 %) SMURF1 (1.84 %) UBC (1.43 %) PRKCZ (1.02 %) F11R (0.82 %) UBA52 (0.61 %) FKBP1A (0.41 %) PARD6A (0.41 %) TGFB1 (0.41 %)	0.0119968	0.0477692	0.225965	0.0119968	0.298619	0.0336183	0.0349134	0.0420054	0.0420054	0.0522281	0.35154	0.0579304	0.113694	0.0648532	0.101728	0.137728	0.124327	0.509053	0.0797816	0.0420054	0.666565	0.126672	0.0704795	0.0785467	0.387465	0.0560334	0.0692322	0.0810148	0.0822464	0.0654801	0.465773	0.110121	0.467918	0.632272	0.0896012	0.0610835	0.65589	0.138884	0.0932564
PTK6 Regulates RHO GTPases// RAS GTPase And MAP Kinases	109	26	203379	126.77	134	0.0240886	0.199236	35.113	64.1791	DOCK1 (5.52 %) ELMO1 (5.11 %) ARHGAP35 (4.29 %) RASA1 (3.89 %) RASA2 (3.68 %) DAB2IP (3.48 %) RASAL2 (3.27 %) SYNGAP1 (2.86 %) RHOA (2.45 %) RASA3 (2.04 %) SPRED2 (2.04 %) ELMO2 (1.64 %) RASAL1 (1.64 %) SPRED1 (1.64 %) RASAL3 (1.43 %) BCAR1 (1.02 %) SPRED3 (1.02 %) HRAS (0.82 %) PTK6 (0.61 %) RAC1 (0.41 %) PXN (0.20 %)	0.0287206	0.111467	0.461215	0.0287206	0.575322	0.0792497	0.0822262	0.0984257	0.0984257	0.121479	0.648604	0.134187	0.252791	0.149469	0.228202	0.300779	0.274252	0.820523	0.181883	0.0984257	0.929479	0.278936	0.161772	0.17923	0.69378	0.129972	0.159054	0.184528	0.187164	0.150845	0.77991	0.245498	0.782037	0.910675	0.202803	0.141167	0.923903	0.303039	0.210509
TP53 Regulates Transcription Of DNA Repair Genes	186	61	429440	204.859	213	0.0169255	0.200735	35.2029	46.0094	MLH1 (11.25 %) ATR ( 9.41 %) FANCD2 ( 7.77 %) MSH2 ( 7.36 %) BRCA1 ( 6.34 %) CDK13 ( 3.89 %) ERCC3 ( 3.89 %) SUPT5H ( 3.68 %) MDC1 ( 3.48 %) POLR2A ( 3.07 %) SSRP1 ( 3.07 %) SUPT16H ( 2.86 %) CHEK1 ( 2.45 %) TCEB3 ( 2.25 %) CCNT1 ( 2.04 %) CCNT2 ( 1.84 %) ERCC2 ( 1.84 %) FANCI ( 1.84 %) PMS2 ( 1.84 %) FANCC ( 1.64 %) ATF2 ( 1.43 %) CCNH ( 1.43 %) ELL ( 1.43 %) GTF2F1 ( 1.43 %) NELFB ( 1.43 %) NEL…	0.0643342	0.236378	0.756153	0.0643342	0.858332	0.171723	0.177821	0.210562	0.210562	0.255872	0.908049	0.280206	0.485711	0.30887	0.446273	0.557995	0.518797	0.980151	0.36751	0.210562	0.997645	0.525856	0.331471	0.362819	0.932829	0.272184	0.326514	0.372166	0.376787	0.311419	0.968386	0.474184	0.969079	0.995961	0.403812	0.29338	0.997198	0.561249	0.416881
Heterotrimeric GPCR Signaling Pathway (through G Alpha I And Pertussis Toxin) ( GPCR Signaling (pertussis Toxin) )// Heterotrimeric GPCR Signaling Pathway (through G Alpha Q// PLC Beta And ERK Cascade) ( GPCR Signaling (G Alpha Q) )// Heterotrimeric GPCR Signaling Pathway (through G Alpha S ACs Epac BRaf And ERKcascade) ( GPCR Signaling (G Alpha S// Epac And ERK) )// Heterotrimeric GPCR Signaling…	65	252	1029106	329.295	337	0.0100445	0.211263	36.7174	35.0148	GRM1 (6.75 %) GRM5 (6.54 %) GRM7 (6.54 %) ADCY2 (6.34 %) ADCY8 (6.13 %) NRG1 (6.13 %) ADCY5 (5.32 %) PRKCB (5.11 %) ADCY1 (4.91 %) GRM6 (4.91 %) PRKCG (4.70 %) PRKCI (4.50 %) GRM8 (4.29 %) GRM3 (4.09 %) ADCY9 (3.89 %) INHBA (3.89 %) AGTR2 (3.48 %) GRM2 (3.48 %) NRG3 (3.27 %) PRKCQ (3.27 %) IL16 (3.07 %) JAG1 (3.07 %) BMP10 (2.86 %) FZD3 (2.86 %) FZD6 (2.86 %) PRKCD (2.86 %) VEGFC (2.86 %) ADCY4 (…	0.167463	0.524455	0.979546	0.167463	0.995421	0.405056	0.417049	0.478818	0.478818	0.55717	0.998609	0.595946	0.840032	0.638759	0.803901	0.894627	0.866821	0.99998	0.717077	0.478818	1	0.872136	0.670392	0.711257	0.999415	0.583414	0.663611	0.722781	0.728369	0.642419	0.999927	0.829954	0.999931	1	0.759611	0.616002	1	0.896751	0.773857
Neurotrophic Factor Mediated Trk Receptor Signaling	256	63	455108	222.091	230	0.0151976	0.211434	36.7174	51.3043	TIAM1 (6.95 %) ABL1 (6.34 %) NTRK3 (6.34 %) DOCK1 (5.52 %) ARHGAP32 (5.32 %) ELMO1 (5.11 %) NTRK2 (4.70 %) PRKCI (4.50 %) RASGRF1 (4.50 %) KIDINS220 (4.29 %) PLCG1 (3.89 %) RAPGEF1 (3.89 %) RASA1 (3.89 %) GAB1 (3.27 %) DNM1 (3.07 %) SOS1 (3.07 %) NTRK1 (2.86 %) NEDD4L (2.66 %) FRS3 (2.45 %) MAGED1 (2.45 %) MCF2L (2.45 %) RHOA (2.45 %) SHC1 (2.45 %) EHD4 (2.25 %) GRB2 (2.25 %) GAB2 (2.04 %) STAT3 …	0.0746131	0.269832	0.807111	0.0746131	0.897604	0.197245	0.204132	0.240967	0.240967	0.291522	0.938144	0.318466	0.539496	0.350009	0.49806	0.614055	0.573855	0.98965	0.413855	0.240967	0.999138	0.581136	0.374728	0.408783	0.95711	0.3096	0.369317	0.418883	0.423868	0.352803	0.982189	0.527438	0.982644	0.998383	0.452895	0.332989	0.998945	0.617366	0.466855
Apoptotic Cleavage Of Cellular Proteins	335	18	122473	94.0336	100	0.026717	0.225321	38.939	62	ROCK1 (5.52 %) ACIN1 (4.29 %) PTK2 (4.09 %) PRKCQ (3.27 %) SATB1 (3.27 %) PRKCD (2.86 %) BIRC2 (1.84 %) STK26 (1.64 %) BMX (1.43 %) STK24 (1.43 %) FNTA (1.23 %) CASP3 (0.82 %) CASP6 (0.61 %) CASP7 (0.61 %) BCAP31 (0.20 %)	0.018403	0.0725624	0.325775	0.018403	0.42067	0.0512668	0.0532228	0.0639089	0.0639089	0.0792375	0.486557	0.0877492	0.169514	0.0980457	0.152196	0.203918	0.184798	0.665414	0.120109	0.0639089	0.815531	0.188156	0.106384	0.118291	0.529674	0.0849208	0.104537	0.121923	0.123733	0.0989759	0.618956	0.164356	0.621308	0.785537	0.134517	0.0924439	0.806364	0.205559	0.139859
ARMS Mediated Activation	9	7	44420	37.7784	42	0.0460054	0.238616	41.0373	90.4762	KIDINS220 (4.29 %) NTRK1 (2.86 %) NGF (1.23 %) YWHAB (0.61 %) RAP1A (0.41 %)	0.00569649	0.0229022	0.114177	0.00569649	0.154555	0.0160559	0.0166803	0.0201072	0.0201072	0.0250705	0.185373	0.0278513	0.0555266	0.0312393	0.0495125	0.0677369	0.0609068	0.285903	0.0385904	0.0201072	0.405398	0.0620983	0.0340025	0.0379799	0.207056	0.0269253	0.0333892	0.0392004	0.0398101	0.0315467	0.256768	0.0537264	0.258182	0.377198	0.0434601	0.0293928	0.396462	0.0683285	0.0452798
STING Mediated Induction Of Host Immune Responses	207	5	19764	26.3464	30	0.0563994	0.242507	41.506	86.6667	IFI16 (2.66 %) MB21D1 (1.84 %) DDX41 (1.43 %) TRIM21 (0.82 %) TMEM173 (0.41 %)	0.00376277	0.0151726	0.0768881	0.00376277	0.104875	0.0106244	0.0110388	0.0133145	0.0133145	0.0166154	0.126543	0.0184672	0.0369969	0.0207259	0.0329547	0.0452307	0.0406204	0.199255	0.0256358	0.0133145	0.290403	0.0414238	0.02257	0.0252276	0.141955	0.0178503	0.0221605	0.0260439	0.0264518	0.020931	0.177843	0.035786	0.178875	0.26837	0.0288955	0.0194945	0.283383	0.0456305	0.030115
TRAIL Signaling Pathway	346	25	161543	112.179	117	0.018273	0.285216	48.5823	76.9231	MAP2K4 (6.95 %) CHUK (4.70 %) MAPK8 (2.86 %) SMPD1 (1.84 %) TNFRSF10C (1.84 %) IKBKB (1.64 %) CASP10 (1.43 %) TNFRSF10A (1.43 %) TRAF2 (1.43 %) RIPK1 (1.23 %) TNFRSF10B (1.23 %) PIK3CB (1.02 %) CFLAR (0.61 %) DAP3 (0.61 %) MAPK1 (0.61 %) MAPK3 (0.61 %) TNFRSF10D (0.61 %) TNFSF10 (0.61 %) TRADD (0.61 %) IKBKG (0.41 %) FADD (0.20 %)	0.0238228	0.0931554	0.40052	0.0238228	0.507667	0.0660338	0.0685325	0.0821567	0.0821567	0.101619	0.579085	0.112384	0.214246	0.125367	0.192911	0.256236	0.232965	0.758581	0.153038	0.0821567	0.888543	0.237064	0.135848	0.150766	0.624382	0.10881	0.13353	0.155304	0.157564	0.126538	0.714194	0.207906	0.716482	0.864468	0.170997	0.118309	0.8813	0.258226	0.177633
ErbB Signaling Pathway	33	9	63995	63.2146	67	0.0252573	0.300439	50.9315	83.5821	MTOR (7.98 %) MAP2K7 (2.25 %) RPS6KB1 (1.64 %) PDK1 (1.43 %) PAK4 (1.23 %) MYC (1.02 %) BCL2L11 (0.82 %)	0.0107395	0.0428454	0.204791	0.0107395	0.27191	0.0301301	0.0312929	0.037664	0.037664	0.0468562	0.321259	0.0519882	0.102351	0.0582231	0.0915169	0.124159	0.111991	0.470838	0.0716846	0.037664	0.625658	0.11412	0.0632939	0.0705702	0.354999	0.0502806	0.0621694	0.0727976	0.0739094	0.0587879	0.429292	0.0991145	0.431342	0.591394	0.0805518	0.0548273	0.614953	0.125209	0.0838552
C MYC Pathway	11	25	143040	115.837	120	0.0153348	0.316281	53.363	67.5	TRRAP (10.84 %) GSK3B ( 3.27 %) PAK2 ( 2.25 %) PML ( 2.25 %) SUPT3H ( 2.25 %) PPP2R5A ( 2.04 %) AXIN1 ( 1.84 %) RUVBL1 ( 1.84 %) ACTL6A ( 1.43 %) KAT5 ( 1.23 %) CDKN2A ( 1.02 %) KAT2A ( 1.02 %) MYC ( 1.02 %) SUPT7L ( 1.02 %) HBP1 ( 0.82 %) MAX ( 0.82 %) RUVBL2 ( 0.82 %) TAF12 ( 0.82 %) PIN1 ( 0.61 %) PPP2CA ( 0.61 %) SKP2 ( 0.61 %) TAF9 ( 0.61 %) ZBTB17 ( 0.61 %) TAF10 ( 0.20 %)	0.0250039	0.097597	0.415726	0.0250039	0.524876	0.069232	0.071847	0.0860991	0.0860991	0.10644	0.596981	0.117682	0.223702	0.13123	0.20155	0.26721	0.243112	0.775208	0.160072	0.0860991	0.90017	0.247359	0.14216	0.157706	0.642403	0.11395	0.139743	0.162432	0.164785	0.132451	0.731614	0.217121	0.73387	0.877409	0.178766	0.123866	0.893346	0.269269	0.185669
FGFR3 Mutant Receptor Activation// FGFR3c Ligand Binding And Activation// Phospholipase C Mediated Cascade; FGFR3// Signaling By Activated Point Mutants Of FGFR3	53	14	58020	61.6409	65	0.0230445	0.322242	54.1124	66.1538	FGFR3 (4.70 %) PLCG1 (3.89 %) GALNT3 (2.86 %) FGF23 (1.43 %) FGF5 (1.43 %) FGF2 (1.02 %) FGF20 (1.02 %) FGF8 (0.82 %) FGF1 (0.61 %) FGF16 (0.61 %) FGF17 (0.61 %) FGF18 (0.61 %) FGF9 (0.20 %)	0.0103959	0.0414962	0.198907	0.0103959	0.264439	0.0291751	0.0303017	0.0364747	0.0364747	0.0453836	0.312745	0.0503586	0.0992278	0.056404	0.0887076	0.120416	0.108592	0.459892	0.0694606	0.0364747	0.613636	0.11066	0.0613215	0.0683795	0.345836	0.0487032	0.060231	0.0705405	0.0716191	0.0569516	0.418901	0.0960845	0.420922	0.579459	0.0780645	0.0531113	0.602949	0.121437	0.0812704
VEGFA VEGFR2 Pathway	297	60	402060	211.59	216	0.00895813	0.333896	55.806	56.9444	KDR (6.54 %) DOCK1 (5.52 %) ROCK1 (5.52 %) VAV3 (5.52 %) ELMO1 (5.11 %) NCKAP1L (4.29 %) VAV1 (4.29 %) PTK2 (4.09 %) VAV2 (3.89 %) FYN (3.48 %) ITGAV (3.27 %) AXL (3.07 %) NCKAP1 (3.07 %) CYFIP1 (2.86 %) WASF3 (2.86 %) ITGB3 (2.66 %) RHOA (2.45 %) ROCK2 (2.45 %) PAK2 (2.25 %) CYFIP2 (2.04 %) NCF2 (2.04 %) PTK2B (2.04 %) HSP90AA1 (1.84 %) PRKACG (1.84 %) ELMO2 (1.64 %) MAPK14 (1.64 %) BAIAP2 (1.23…	0.0682337	0.249203	0.776835	0.0682337	0.874696	0.181467	0.187869	0.222198	0.222198	0.269557	0.920848	0.294917	0.506747	0.324721	0.466452	0.580088	0.540403	0.984483	0.385447	0.222198	0.99839	0.547565	0.348166	0.380602	0.943308	0.286563	0.343028	0.390254	0.395023	0.327367	0.974551	0.494989	0.975144	0.997143	0.422866	0.308624	0.998063	0.583373	0.436303
Recognition Of DNA Damage By PCNA Containing Replication Complex	216	28	134052	110.399	114	0.0139407	0.339957	56.443	59.6491	POLE (7.57 %) POLD1 (3.89 %) RFC1 (3.68 %) DDB1 (3.07 %) POLD3 (2.86 %) RAD18 (2.66 %) RPA1 (2.04 %) USP1 (2.04 %) CUL4B (1.84 %) CUL4A (1.64 %) DTL (1.64 %) RFC4 (1.43 %) RFC5 (1.43 %) UBC (1.43 %) ZBTB32 (1.23 %) PCNA (1.02 %) POLE2 (0.82 %) RPA3 (0.82 %) UBA52 (0.61 %) UBE2B (0.61 %) POLD2 (0.41 %) RFC2 (0.41 %) RBX1 (0.20 %) RPA2 (0.20 %)	0.0232588	0.0910288	0.393127	0.0232588	0.499239	0.0645041	0.0669471	0.0802699	0.0802699	0.0993097	0.570269	0.109846	0.209695	0.122556	0.188757	0.250943	0.228076	0.75022	0.149661	0.0802699	0.882528	0.232103	0.13282	0.147435	0.615467	0.106348	0.13055	0.151882	0.154097	0.123703	0.705489	0.203471	0.707791	0.857822	0.167264	0.115646	0.875083	0.252899	0.173771
FGF8 Signaling Pathway(Mouse) ( FGF8 Signaling (Mouse) )// FGF8 Signaling Pathway(Xenopus) ( FGF8 Signaling (Xenopus) )	47	20	124306	92.5889	96	0.0157121	0.340878	56.443	67.7083	SOS1 (3.07 %) ERG (2.86 %) ETV5 (2.86 %) RAF1 (2.66 %) FRS3 (2.45 %) ETV6 (2.25 %) ARAF (2.04 %) ETS1 (2.04 %) FLI1 (1.84 %) ELK3 (1.43 %) ELK1 (1.02 %) ELK4 (1.02 %) ETS2 (1.02 %) FRS2 (1.02 %) SPI1 (1.02 %) HRAS (0.82 %)	0.0180019	0.0710243	0.319903	0.0180019	0.413671	0.0501678	0.0520831	0.0625481	0.0625481	0.077564	0.478973	0.0859045	0.166114	0.0959961	0.149112	0.199914	0.181126	0.657258	0.117629	0.0625481	0.808544	0.184425	0.10417	0.115846	0.521805	0.0831327	0.10236	0.119408	0.121184	0.0969079	0.610782	0.161049	0.613132	0.778149	0.131763	0.0905054	0.799243	0.201528	0.137004
Warburg Effect	374	45	216985	146.183	150	0.0111941	0.343102	56.5483	57.3333	IDH1 (4.09 %) PC (3.07 %) ALDOB (2.86 %) LDHA (2.86 %) SDHA (2.86 %) DHTKD1 (2.66 %) G6PD (2.66 %) PKLR (2.25 %) SLC16A1 (2.25 %) DLAT (2.04 %) FH (2.04 %) ACO2 (1.64 %) MDH1 (1.64 %) PDHA1 (1.64 %) SLC1A5 (1.43 %) SLC2A2 (1.43 %) TKT (1.43 %) GLS2 (1.23 %) GPI (1.23 %) HK2 (1.23 %) PFKL (1.23 %) PGD (1.23 %) DLD (0.82 %) DLST (0.82 %) GLUD1 (0.82 %) IDH3A (0.82 %) IDH3G (0.82 %) PGAM2 (0.82 %) P…	0.0360381	0.138304	0.541103	0.0360381	0.659954	0.0987687	0.102437	0.122345	0.122345	0.150516	0.732129	0.165964	0.307215	0.184463	0.278378	0.362778	0.332181	0.885074	0.223413	0.122345	0.964564	0.337606	0.199293	0.220239	0.774756	0.160846	0.196021	0.226573	0.229721	0.186124	0.851407	0.298687	0.853214	0.952276	0.24834	0.174424	0.961	0.365372	0.257481
Regulation Of Necroptotic Cell Death	343	7	38779	39.4582	42	0.0271119	0.346695	56.8772	80.9524	BIRC3 (3.27 %) XIAP (2.04 %) BIRC2 (1.84 %) TRAF2 (1.43 %) RIPK1 (1.23 %) TRADD (0.61 %)	0.00599724	0.0241002	0.119846	0.00599724	0.162038	0.0168989	0.0175558	0.0211606	0.0211606	0.0263805	0.19417	0.0293044	0.0583795	0.0328661	0.052065	0.0711932	0.0640267	0.298524	0.0405919	0.0211606	0.421544	0.065277	0.0357705	0.0399504	0.216738	0.0283307	0.0351259	0.0412329	0.0418735	0.0331893	0.268356	0.0564896	0.269822	0.392621	0.0457081	0.030925	0.412386	0.0718138	0.0476196
TP53 Regulates Transcription Of Genes Involved In Cytochrome C Release	187	19	114205	70.1023	73	0.0175908	0.35472	57.9268	72.6027	TP63 (4.29 %) BAX (3.27 %) TP53BP2 (2.86 %) ZNF420 (2.45 %) PPP1R13B (2.04 %) TP73 (1.23 %) STEAP3 (1.02 %) BNIP3L (0.82 %) TP53INP1 (0.61 %) AIFM2 (0.41 %) BID (0.41 %) TP53AIP1 (0.41 %) TRIAP1 (0.20 %)	0.0122958	0.0489375	0.230921	0.0122958	0.304831	0.0344468	0.0357732	0.0430359	0.0430359	0.0535024	0.358546	0.0593393	0.116373	0.0664246	0.104142	0.140927	0.127238	0.517736	0.0816985	0.0430359	0.675625	0.129634	0.0721819	0.0804353	0.394949	0.0573977	0.0709055	0.08296	0.0842198	0.067066	0.474107	0.112721	0.476272	0.641384	0.0917421	0.0625665	0.664975	0.142107	0.0954801
PI3 Kinase Pathway	98	38	271752	160.477	164	0.0094309	0.359907	58.5054	57.9268	JAK2 (9.82 %) IRS1 (4.50 %) INSR (4.29 %) NOS3 (4.29 %) GSK3B (3.27 %) INPPL1 (3.07 %) SOS1 (3.07 %) FOXO4 (2.45 %) AKT1 (2.25 %) GNAQ (2.25 %) AKT3 (1.84 %) GNA14 (1.84 %) AKT2 (1.64 %) FOXO1 (1.64 %) GNB4 (1.64 %) RPS6KB1 (1.64 %) CASP9 (1.43 %) GNA11 (1.43 %) GNB3 (1.23 %) PIK3CB (1.02 %) PIK3R3 (1.02 %) PIK3R5 (1.02 %) RPS6KB2 (1.02 %) FOXO3 (0.82 %) PDPK1 (0.82 %) GNB1 (0.61 %) GNB5 (0.61 %)…	0.0420447	0.159874	0.598113	0.0420447	0.717019	0.114589	0.118805	0.141635	0.141635	0.173791	0.785957	0.191346	0.349193	0.212297	0.317379	0.409852	0.376556	0.920493	0.256143	0.141635	0.979936	0.382479	0.229034	0.252584	0.825253	0.185536	0.225346	0.259685	0.26321	0.214175	0.892604	0.339808	0.894131	0.971573	0.284009	0.200938	0.977555	0.412662	0.294188
Stabilization Of P53	174	9	68271	44.6891	47	0.0218964	0.368604	59.6468	87.234	CHEK2 (5.73 %) MDM2 (1.84 %) UBC (1.43 %) MDM4 (1.23 %) UBA52 (0.61 %)	0.00696203	0.027936	0.137799	0.00696203	0.185615	0.0196001	0.0203609	0.0245345	0.0245345	0.0305735	0.22177	0.0339539	0.0674792	0.0380696	0.0602122	0.0822013	0.0739714	0.337549	0.0469886	0.0245345	0.470467	0.075408	0.041424	0.0462485	0.247026	0.0328284	0.0406796	0.0477281	0.048467	0.0384429	0.304346	0.065305	0.305965	0.439594	0.0528885	0.0358269	0.460719	0.0829135	0.0550916
P53 Pathway By Glucose Deprivation	162	21	146524	120.377	123	0.0093603	0.390486	62.9018	68.2927	STK11 (7.16 %) TP63 (4.29 %) TSC2 (3.48 %) PRKAA2 (3.27 %) TSC1 (2.66 %) AKT1 (2.25 %) PRKAA1 (2.04 %) AKT3 (1.84 %) AKT2 (1.64 %) RPS6KB1 (1.64 %) RHEB (1.23 %) TP73 (1.23 %) PRKAB1 (1.02 %) PRKAB2 (1.02 %) PRKAG1 (1.02 %) RPS6KB2 (1.02 %) IGBP1 (0.82 %) PPP2CA (0.61 %) PPP2CB (0.61 %)	0.0265132	0.103249	0.434624	0.0265132	0.546024	0.0733086	0.0760712	0.0911194	0.0911194	0.112571	0.618778	0.124414	0.235635	0.138675	0.21247	0.281016	0.255901	0.794826	0.168989	0.0911194	0.913297	0.260331	0.15017	0.166504	0.664208	0.120484	0.147629	0.171466	0.173936	0.13996	0.752366	0.228758	0.754574	0.892182	0.188602	0.130926	0.906995	0.28316	0.195838
Spry Regulation Of FGF Signaling	128	16	96494	69.2956	71	0.0105528	0.422825	67.6369	91.5493	CBL (7.98 %) GRB2 (2.25 %) UBC (1.43 %) SRC (0.82 %) MAPK1 (0.61 %) MAPK3 (0.61 %) MKNK1 (0.61 %) PPP2CA (0.61 %) PPP2CB (0.61 %) UBA52 (0.61 %)	0.0121091	0.0482081	0.22783	0.0121091	0.300958	0.0339295	0.0352364	0.0423926	0.0423926	0.0527069	0.35418	0.0584598	0.114701	0.0654437	0.102636	0.138931	0.125421	0.512332	0.080502	0.0423926	0.669997	0.127786	0.0711192	0.0792564	0.390286	0.056546	0.069861	0.0817458	0.082988	0.066076	0.468918	0.111099	0.471071	0.635721	0.0904058	0.0616407	0.65933	0.140095	0.0940922
Signaling By FGFR3 Point Mutants In Cancer	123	22	118457	84.2212	86	0.00907702	0.42368	67.6369	67.4419	FGFR3 (4.70 %) PLCG1 (3.89 %) GAB1 (3.27 %) SOS1 (3.07 %) GRB2 (2.25 %) FGF23 (1.43 %) FGF5 (1.43 %) FGF2 (1.02 %) FGF20 (1.02 %) FRS2 (1.02 %) FGF8 (0.82 %) HRAS (0.82 %) FGF1 (0.61 %) FGF16 (0.61 %) FGF17 (0.61 %) FGF18 (0.61 %) FGF9 (0.20 %)	0.0157625	0.0624027	0.286219	0.0157625	0.373077	0.0440179	0.045704	0.0549247	0.0549247	0.0681779	0.434589	0.075551	0.146901	0.0844834	0.131708	0.177223	0.160348	0.608007	0.103674	0.0549247	0.764445	0.163308	0.0917274	0.10209	0.475458	0.0730998	0.0901226	0.105255	0.106833	0.0852911	0.561894	0.142371	0.564208	0.732046	0.116243	0.0796219	0.754467	0.178674	0.120911
G2/M DNA Replication Checkpoint	155	5	23563	30.7484	32	0.0173269	0.430423	68.4066	81.25	WEE1 (2.5 %) CCNB1 (1.6 %) CDK1 (1.4 %) PKMYT1 (1.2 %) CCNB2 (1.0 %)	0.00448441	0.0180626	0.0909755	0.00448441	0.123736	0.0126537	0.0131466	0.0158534	0.0158534	0.0197774	0.148965	0.0219777	0.0439499	0.0246603	0.0391636	0.0536875	0.0482373	0.232737	0.0304877	0.0158534	0.335685	0.0491874	0.0268497	0.0300034	0.166838	0.0212448	0.0263636	0.0309717	0.0314555	0.0249038	0.208214	0.0425165	0.209399	0.311021	0.0343533	0.023198	0.327843	0.05416	0.0357989
EGF Signaling Pathway ( EGF Signaling Pathway Diagram )	28	13	87575	55.7776	57	0.00941521	0.447316	70.7754	82.4561	SOS1 (3.07 %) RAF1 (2.66 %) SHC1 (2.45 %) GRB2 (2.25 %) EGF (1.23 %) HRAS (0.82 %) SHC3 (0.82 %) SHC2 (0.61 %)	0.00915342	0.0366063	0.177289	0.00915342	0.23681	0.0257176	0.0267126	0.0321667	0.0321667	0.0400453	0.28109	0.0444489	0.0878545	0.0498035	0.078487	0.106761	0.0962037	0.418432	0.0613826	0.0321667	0.566905	0.0980487	0.0541623	0.060423	0.311639	0.0429833	0.0531954	0.0623411	0.0632986	0.0502888	0.379766	0.0850543	0.381665	0.533366	0.0690234	0.0468865	0.55638	0.107673	0.0718726
Mitochondrial Beta Oxidation Of Medium Chain Saturated Fatty Acids	368	8	27471	35.1019	36	0.0109723	0.461154	72.642	80.5556	ACADM (1.84 %) HADHA (1.84 %) HADHB (1.84 %) ACSM1 (1.43 %) ACAA2 (1.02 %) ECHS1 (1.02 %) HADH (0.41 %) SLC25A20 (0.41 %)	0.00522622	0.0210266	0.105243	0.00522622	0.142724	0.0147368	0.0153103	0.0184584	0.0184584	0.0230195	0.171431	0.0255758	0.0510501	0.0286911	0.0455091	0.0623089	0.0560095	0.26572	0.0354535	0.0184584	0.379254	0.0571081	0.0312325	0.0348918	0.191682	0.0247244	0.0306683	0.0360149	0.036576	0.0289738	0.238287	0.0493912	0.239616	0.352303	0.0399357	0.0269931	0.370703	0.0628546	0.0416111
Mitochondrial Beta Oxidation Of Long Chain Saturated Fatty Acids	367	10	40450	48.4667	49	0.00475241	0.491192	77.0327	87.7551	CPT1A (2.66 %) HADHA (1.84 %) HADHB (1.84 %) ACSL1 (1.43 %) ACAA2 (1.02 %) ACADL (1.02 %) ECHS1 (1.02 %) CPT2 (0.61 %) HADH (0.41 %) SLC25A20 (0.41 %)	0.0076859	0.0308065	0.151039	0.0076859	0.202882	0.0216236	0.022462	0.0270603	0.0270603	0.0337102	0.241873	0.0374308	0.0742545	0.0419587	0.0662841	0.0903818	0.0813697	0.36542	0.051764	0.0270603	0.504466	0.0829434	0.0456475	0.0509507	0.268998	0.0361922	0.044829	0.0525766	0.0533884	0.0423693	0.330204	0.0718705	0.331924	0.472463	0.058245	0.0394916	0.494381	0.0911613	0.060664
Arf6 Downstream Pathway	242	15	109185	99.5274	100	0.00205744	0.497415	77.272	77	KALRN (7.57 %) TIAM1 (6.95 %) PLD1 (3.48 %) RHOA (2.45 %) PLAUR (1.64 %) PLD2 (1.64 %) PIP5K1A (1.23 %) RAB11A (1.02 %) MAPK1 (0.61 %) MAPK3 (0.61 %) RAB11FIP3 (0.41 %) RAC1 (0.41 %) ARF1 (0.20 %) ARF6 (0.20 %)	0.0199685	0.0785465	0.348231	0.0199685	0.447218	0.0555476	0.057662	0.0692064	0.0692064	0.0857462	0.515143	0.0949204	0.182665	0.106008	0.16414	0.219367	0.198986	0.695458	0.129731	0.0692064	0.84047	0.202568	0.114979	0.127778	0.559194	0.0918726	0.112994	0.131679	0.133623	0.10701	0.649274	0.177151	0.651624	0.812114	0.145195	0.0999773	0.831843	0.221115	0.150923
AKT(PKB) Activation Signaling ( Insulin Receptor Signaling (Mammal) )	5	13	128009	107.539	108	0.00185939	0.498153	77.272	76.8519	MTOR (7.98 %) RICTOR (4.50 %) TSC2 (3.48 %) TSC1 (2.66 %) AKT1 (2.25 %) PIK3CD (2.25 %) AKT3 (1.84 %) AKT2 (1.64 %) MAPKAP1 (1.23 %) PIK3CB (1.02 %) PDPK1 (0.82 %) MLST8 (0.41 %)	0.0223679	0.0876615	0.38127	0.0223679	0.48564	0.0620843	0.0644389	0.0772835	0.0772835	0.0956525	0.555974	0.105824	0.202456	0.1181	0.182156	0.242511	0.220296	0.736429	0.144303	0.0772835	0.872366	0.224205	0.128019	0.14215	0.600962	0.102446	0.125825	0.146452	0.148594	0.119208	0.691206	0.196419	0.693525	0.84666	0.161338	0.111425	0.8646	0.244412	0.167638
Gastrin CREB Signalling Pathway Via PKC And MAPK	60	9	55865	62.575	63	0.0029398	0.499229	77.272	77.7778	RPS6KA2 (4.91 %) RPS6KA3 (3.27 %) CCKBR (3.07 %) RPS6KA1 (1.84 %) MAPK7 (1.23 %) CREB1 (0.61 %) MAPK1 (0.61 %) MAPK3 (0.61 %) GAST (0.20 %)	0.0105993	0.0422951	0.202395	0.0105993	0.268871	0.0297405	0.0308886	0.0371789	0.0371789	0.0462556	0.317798	0.0513236	0.101078	0.0574813	0.0903717	0.122634	0.110606	0.466399	0.0707778	0.0371789	0.620799	0.11271	0.0624896	0.0696769	0.351276	0.0496373	0.061379	0.0718773	0.0729756	0.0580391	0.425075	0.0978795	0.427113	0.586566	0.0795378	0.0541275	0.6101	0.123672	0.0828014
Synthesis// Secretion// And Inactivation Of Glucose Dependent Insulinotropic Polypeptide (GIP)	373	13	61854	62.1643	62	-0.00114924	0.536148	82.6272	75.8065	PCSK1 (3.89 %) PAX6 (3.68 %) ISL1 (2.25 %) DPP4 (1.84 %) SPCS2 (1.23 %) GPR119 (1.02 %) SEC11C (1.02 %) FFAR1 (0.82 %) GATA4 (0.82 %) SPCS3 (0.61 %) SPCS1 (0.41 %)	0.0105097	0.0419432	0.20086	0.0105097	0.266922	0.0294914	0.0306301	0.0368687	0.0368687	0.0458715	0.315576	0.0508985	0.100263	0.0570067	0.0896388	0.121657	0.109719	0.463542	0.0701976	0.0368687	0.617659	0.111807	0.0619751	0.0691055	0.348885	0.0492258	0.0608733	0.0712885	0.0723781	0.0575601	0.422363	0.097089	0.424393	0.583449	0.0788889	0.0536799	0.606965	0.122688	0.0821271
VEGFR1 Specific Signals	298	29	230519	147.64	147	-0.0018854	0.55116	84.5746	60.5442	CBL (7.98 %) FLT1 (6.95 %) PRKCB (5.11 %) NOS3 (4.29 %) PLCG1 (3.89 %) RASA1 (3.89 %) NRP2 (2.86 %) HIF1A (2.45 %) AKT1 (2.25 %) NRP1 (2.04 %) HSP90AA1 (1.84 %) PRKCA (1.64 %) CD2AP (1.43 %) VEGFA (1.02 %) PDPK1 (0.82 %) MAPK1 (0.61 %) MAPK3 (0.61 %) PGF (0.61 %) SHC2 (0.61 %) VEGFB (0.61 %) CAV1 (0.41 %) PRKACA (0.41 %) CALM2 (0.20 %) CALM3 (0.20 %) NCK1 (0.20 %)	0.0366256	0.140432	0.547002	0.0366256	0.665992	0.100324	0.104046	0.124245	0.124245	0.152815	0.737926	0.168474	0.311425	0.18722	0.282278	0.36753	0.336645	0.889131	0.226667	0.124245	0.966476	0.342122	0.202243	0.223455	0.780264	0.163287	0.198929	0.229867	0.233053	0.188903	0.856039	0.302807	0.857818	0.954627	0.251896	0.177048	0.963045	0.370147	0.261143
Apoptosis Signaling Pathway	333	104	663734	272.892	272	-0.00142254	0.558777	85.3754	43.0147	IGF2R (9.20 %) MAP2K4 (6.95 %) PIK3CG (6.95 %) APAF1 (5.11 %) PRKCB (5.11 %) CHUK (4.70 %) PRKCG (4.70 %) MAP4K4 (4.50 %) HSPA1L (4.29 %) MADD (4.29 %) MAP4K3 (3.89 %) DAXX (3.48 %) MAPK10 (3.48 %) BAX (3.27 %) BIRC3 (3.27 %) PRKCQ (3.27 %) MAP3K5 (2.86 %) MAPK8 (2.86 %) PRKCD (2.86 %) MAPK9 (2.66 %) PRKCH (2.66 %) AIFM1 (2.45 %) AKT1 (2.25 %) ATF6 (2.25 %) PIK3CD (2.25 %) REL (2.25 %) BAG4 (2.04…	0.111299	0.380307	0.91825	0.111299	0.968812	0.284173	0.293496	0.342647	0.342647	0.4081	0.985515	0.44201	0.692703	0.480829	0.649655	0.765126	0.726905	0.999046	0.556407	0.342647	0.999978	0.733972	0.510573	0.550553	0.991703	0.430928	0.504114	0.562185	0.567887	0.484221	0.997822	0.680376	0.997906	0.999943	0.600576	0.460003	0.99997	0.768185	0.615981
Negative Feedback Regulation Pathway Of TGF Beta Superfamily Signaling By (binding Of Smad6/7 And TGF Beta Receptor I) ( TGF Beta Super Family Signaling Pathway(canonical) )	232	8	51491	53.5569	53	-0.00453919	0.563588	85.7425	79.2453	BMPR1A (3.48 %) TGFBR1 (3.48 %) BMPR1B (2.25 %) ACVR1 (1.64 %) ACVRL1 (1.64 %) SMAD7 (0.41 %) SMAD6 (0.20 %)	0.00869821	0.0348101	0.169231	0.00869821	0.226438	0.0244489	0.0253954	0.0305848	0.0305848	0.0380837	0.269141	0.0422763	0.0836553	0.0473758	0.074717	0.10171	0.0916258	0.402472	0.0584079	0.0305848	0.548419	0.0933876	0.0515279	0.0574935	0.298679	0.0408808	0.0506068	0.0593215	0.0602342	0.047838	0.36479	0.0809829	0.366638	0.515258	0.0656916	0.0445976	0.537999	0.102581	0.0684084
Interleukin Signaling Pathway	74	86	472862	230.23	229	-0.00232648	0.572561	86.6622	45.8515	MTOR (7.98 %) JAK3 (5.73 %) RPS6KA2 (4.91 %) CHUK (4.70 %) IRS1 (4.50 %) NOS3 (4.29 %) IL12RB2 (3.89 %) RASA1 (3.89 %) STAT5B (3.89 %) RPS6KA6 (3.68 %) IL13RA2 (3.48 %) MAPK6 (3.48 %) GSK3B (3.27 %) RPS6KA3 (3.27 %) STAT1 (3.27 %) SOS1 (3.07 %) RAF1 (2.66 %) SHC1 (2.45 %) AKT1 (2.25 %) STAT2 (2.25 %) STAT4 (2.25 %) ARAF (2.04 %) IL6ST (2.04 %) STAT3 (2.04 %) AKT3 (1.84 %) RPS6KA1 (1.84 %) STAT5A …	0.0798175	0.286344	0.82887	0.0798175	0.913245	0.209971	0.217239	0.256036	0.256036	0.309061	0.949478	0.337209	0.564749	0.370059	0.522603	0.639875	0.59949	0.992577	0.436191	0.256036	0.999484	0.606825	0.395722	0.430956	0.96589	0.327956	0.390111	0.441378	0.446518	0.372963	0.986712	0.552512	0.987076	0.998987	0.476376	0.352348	0.999359	0.643189	0.490695
Constitutive Signaling By NOTCH1 HD Domain Mutants	268	15	97589	90.9514	90	-0.00456707	0.575674	86.6622	74.4444	NOTCH1 (5.93 %) JAG1 (3.07 %) ADAM17 (2.45 %) MIB1 (2.45 %) JAG2 (2.25 %) DLL1 (1.84 %) ADAM10 (1.64 %) MIB2 (1.64 %) DLL4 (1.43 %) UBC (1.43 %) NEURL1 (0.61 %) UBA52 (0.61 %) NEURL1B (0.41 %)	0.0175524	0.0692987	0.313267	0.0175524	0.405733	0.0489356	0.050805	0.0610216	0.0610216	0.075686	0.470346	0.0838339	0.16229	0.093695	0.145644	0.195407	0.176993	0.647888	0.114843	0.0610216	0.800403	0.180226	0.101684	0.1131	0.512835	0.081126	0.0999149	0.116583	0.11832	0.0945862	0.60142	0.15733	0.603766	0.769573	0.128667	0.0883295	0.790957	0.196988	0.133795
EPHB Mediated Forward Signaling	249	42	323822	188.293	187	-0.00299337	0.577342	86.6622	50.8021	EPHB1 (8.59 %) KALRN (7.57 %) TIAM1 (6.95 %) GRIN2B (5.93 %) ROCK1 (5.52 %) PTK2 (4.09 %) RASA1 (3.89 %) FYN (3.48 %) WASL (3.27 %) EPHB2 (3.07 %) EPHB6 (2.86 %) EPHB4 (2.66 %) PAK1 (2.66 %) EPHB3 (2.45 %) RHOA (2.45 %) ROCK2 (2.45 %) ARHGEF28 (2.25 %) EFNB3 (2.25 %) LIMK2 (2.25 %) LYN (2.04 %) ARPC1A (1.84 %) YES1 (1.84 %) LIMK1 (1.64 %) GRIN1 (1.43 %) SDC2 (1.43 %) ACTG1 (1.23 %) EFNB1 (1.23 %)…	0.0553404	0.206169	0.701263	0.0553404	0.812341	0.148966	0.154332	0.183248	0.183248	0.223551	0.870383	0.245342	0.434082	0.271145	0.397128	0.502908	0.4654	0.965116	0.324423	0.183248	0.994376	0.472121	0.2916	0.320136	0.900938	0.238147	0.287105	0.328683	0.332916	0.273447	0.948037	0.42324	0.949014	0.991075	0.35776	0.257182	0.993474	0.506043	0.369833
Activation Of RAS In B Cells	3	5	30820	25.5217	25	-0.0089702	0.579371	86.6622	92	RASGRP3 (2.66 %) RASGRP1 (2.04 %) HRAS (0.82 %)	0.00363069	0.014643	0.0742874	0.00363069	0.101381	0.0102528	0.0106527	0.0128493	0.0128493	0.0160358	0.122377	0.0178237	0.0357194	0.0200044	0.0318144	0.0436754	0.0392204	0.192973	0.0247456	0.0128493	0.28179	0.0399967	0.021785	0.0243514	0.137323	0.0172281	0.0213896	0.0251397	0.0255336	0.0202024	0.172162	0.0345496	0.173165	0.260286	0.0278937	0.0188155	0.274937	0.0440618	0.0290716
IGF1 Signaling Pathway ( IGF1 Signaling Pathway )	67	27	170670	109.236	108	-0.0049435	0.586341	87.3378	67.5926	IRS1 (4.50 %) IGF1R (4.29 %) SOS1 (3.07 %) RAF1 (2.66 %) SHC1 (2.45 %) GRB2 (2.25 %) PIK3CD (2.25 %) ARAF (2.04 %) IGFBP3 (1.64 %) IGF1 (1.23 %) PIK3CB (1.02 %) HRAS (0.82 %) SHC3 (0.82 %) IGFBP2 (0.61 %) IGFBP4 (0.61 %) KLK3 (0.61 %) PIK3R2 (0.61 %) SHC2 (0.61 %) IGFBP6 (0.41 %) IGFBP1 (0.20 %) IGFBP5 (0.20 %)	0.0228945	0.0896531	0.388305	0.0228945	0.493721	0.0635152	0.0659221	0.0790497	0.0790497	0.0978157	0.564479	0.108203	0.206742	0.120736	0.186063	0.247506	0.224903	0.744669	0.147474	0.0790497	0.878474	0.228883	0.13086	0.145277	0.609599	0.104754	0.12862	0.149665	0.15185	0.121867	0.699729	0.200594	0.702038	0.853359	0.164846	0.113922	0.870897	0.24944	0.171268
Canonical Wnt Signaling Pathway	267	21	133013	100.491	99	-0.00649037	0.601787	89.2516	73.7374	LRP6 (4.91 %) GSK3B (3.27 %) DVL2 (2.25 %) GRK5 (2.25 %) PPP2R5A (2.04 %) AXIN1 (1.84 %) DVL3 (1.84 %) CUL3 (1.64 %) GSK3A (1.23 %) PI4K2A (1.23 %) RANBP3 (1.02 %) KLHL12 (0.82 %) NKD2 (0.82 %) PIP5K1B (0.82 %) WNT3A (0.82 %) CSNK1G1 (0.61 %) DVL1 (0.61 %) CAV1 (0.41 %)	0.0202496	0.079618	0.352187	0.0202496	0.451859	0.056315	0.0584576	0.0701553	0.0701553	0.0869112	0.520109	0.0962033	0.185006	0.107432	0.166269	0.222112	0.20151	0.700564	0.131449	0.0701553	0.844581	0.205131	0.116515	0.129473	0.5643	0.0931165	0.114505	0.133421	0.135389	0.108446	0.654462	0.17943	0.65681	0.816529	0.147101	0.101325	0.836053	0.223878	0.152897
HIF 1 Alpha Transcription Factor Network	271	67	411122	212.964	211	-0.00402386	0.604203	89.2516	51.6588	EP300 (9.20 %) ABCB1 (4.91 %) NCOA2 (4.50 %) CP (4.29 %) SMAD3 (3.89 %) TF (3.89 %) ITGB2 (3.27 %) FURIN (3.07 %) NCOA1 (3.07 %) LDHA (2.86 %) HK1 (2.66 %) HIF1A (2.45 %) SLC2A3 (2.45 %) ABCG2 (2.25 %) AKT1 (2.25 %) CA9 (2.25 %) GATA2 (2.25 %) ETS1 (2.04 %) HDAC7 (2.04 %) HNF4A (2.04 %) NOS2 (1.84 %) PGM1 (1.84 %) SERPINE1 (1.84 %) TERT (1.64 %) ARNT (1.43 %) CXCR4 (1.43 %) ENG (1.43 %) NT5E (1.4…	0.0690476	0.251859	0.780935	0.0690476	0.877872	0.183491	0.189956	0.22461	0.22461	0.272388	0.923292	0.297957	0.511038	0.327991	0.470581	0.584569	0.5448	0.985262	0.389135	0.22461	0.998513	0.55198	0.351606	0.38426	0.945284	0.289535	0.346431	0.393972	0.398771	0.330657	0.97568	0.499237	0.976254	0.997343	0.426775	0.311772	0.998207	0.587859	0.440284
Constitutive Signaling By AKT1 E17K In Cancer	20	25	190331	143.92	142	-0.0058331	0.611841	90.0064	66.1972	MTOR (7.98 %) CHUK (4.70 %) RICTOR (4.50 %) TSC2 (3.48 %) GSK3B (3.27 %) FOXO4 (2.45 %) AKT1 (2.25 %) AKT3 (1.84 %) MDM2 (1.84 %) AKT2 (1.64 %) FOXO1 (1.64 %) CASP9 (1.43 %) GSK3A (1.23 %) MAPKAP1 (1.23 %) RPS6KB2 (1.02 %) AKT1S1 (0.82 %) FOXO3 (0.82 %) PDPK1 (0.82 %) CREB1 (0.61 %) PRR5 (0.61 %) CDKN1A (0.41 %) MLST8 (0.41 %) NR4A1 (0.41 %) BAD (0.20 %)	0.0351362	0.13503	0.531904	0.0351362	0.650479	0.0963774	0.0999615	0.119421	0.119421	0.146978	0.722985	0.162098	0.300705	0.180215	0.272354	0.355419	0.325276	0.878561	0.218393	0.119421	0.961416	0.330618	0.194746	0.215281	0.766037	0.157088	0.191539	0.221494	0.224581	0.181842	0.84401	0.292318	0.845859	0.948429	0.242853	0.170382	0.957639	0.357976	0.251827
Loss Of Function Of FBXW7 In Cancer And NOTCH1 Signaling	276	5	39578	33.1978	32	-0.015959	0.624373	91.1903	100	NOTCH1 (5.93 %) SKP1 (0.41 %) RBX1 (0.20 %)	0.00489828	0.0197171	0.0989621	0.00489828	0.13438	0.0138162	0.0143541	0.0173074	0.0173074	0.0215872	0.161571	0.0239864	0.0479171	0.0269108	0.0427085	0.0585065	0.0525807	0.251314	0.0332609	0.0173074	0.360353	0.053614	0.029297	0.0327333	0.180789	0.0231874	0.0287672	0.0337882	0.0343152	0.0271763	0.225133	0.0463575	0.2264	0.334363	0.0374713	0.0253168	0.352099	0.05902	0.0390454
Glycolysis And Gluconeogenesis ( Glycolysis And Gluconeogenesis )	357	12	60671	66.6538	65	-0.0109114	0.625012	91.1903	70.7692	HK3 (4.09 %) PFKP (3.07 %) HK1 (2.66 %) PKLR (2.25 %) GCK (1.23 %) HK2 (1.23 %) PFKL (1.23 %) FBP2 (1.02 %) G6PC (1.02 %) PKM (0.82 %) PFKM (0.61 %) FBP1 (0.20 %)	0.0115059	0.0458491	0.217762	0.0115059	0.288306	0.0322574	0.0335009	0.0403121	0.0403121	0.0501336	0.339877	0.0556139	0.109281	0.0622692	0.0977537	0.132453	0.11953	0.494467	0.0766275	0.0403121	0.651148	0.121791	0.0676795	0.0754394	0.374983	0.0537906	0.0664799	0.077814	0.0789991	0.0628719	0.45181	0.105838	0.453921	0.616817	0.0860773	0.0586449	0.640446	0.133568	0.089596
Activated NOTCH1 Transmits Signal To The Nucleus	265	30	176194	136.241	134	-0.00720196	0.62856	91.3336	58.9552	NOTCH1 (5.93 %) CNTN1 (4.91 %) JAG1 (3.07 %) ADAM17 (2.45 %) DNER (2.45 %) MIB1 (2.45 %) JAG2 (2.25 %) DLL1 (1.84 %) DTX2 (1.84 %) DTX4 (1.84 %) NUMB (1.84 %) ADAM10 (1.64 %) MIB2 (1.64 %) DLL4 (1.43 %) ITCH (1.43 %) UBC (1.43 %) APH1B (1.23 %) DLK1 (1.23 %) DTX1 (1.23 %) NCSTN (1.23 %) PSEN2 (1.23 %) ARRB1 (0.61 %) NEURL1 (0.61 %) UBA52 (0.61 %) APH1A (0.41 %) NEURL1B (0.41 %) PSENEN (0.41 %) AR…	0.0321728	0.124205	0.500428	0.0321728	0.617515	0.0884919	0.0917979	0.109768	0.109768	0.135273	0.690757	0.149297	0.278929	0.166129	0.252246	0.330688	0.302127	0.854501	0.201706	0.109768	0.948996	0.307181	0.179652	0.1988	0.735007	0.144647	0.176666	0.204601	0.207486	0.167642	0.817074	0.271026	0.819057	0.933504	0.224577	0.156989	0.94445	0.333115	0.232984
Class I PI3K Signaling Events	16	46	307204	175.595	173	-0.00646527	0.635551	91.974	56.0694	PIK3CG (6.95 %) ARAP3 (4.91 %) ITK (4.91 %) PLCG2 (4.50 %) PLCG1 (3.89 %) FYN (3.48 %) HCK (3.27 %) INPPL1 (3.07 %) INPP5D (2.66 %) RHOA (2.45 %) ZAP70 (2.45 %) AKT1 (2.25 %) BTK (2.04 %) LYN (2.04 %) HSP90AA1 (1.84 %) LCK (1.84 %) SGK1 (1.84 %) YES1 (1.84 %) BLK (1.64 %) SYK (1.64 %) CYTH3 (1.43 %) PIK3R6 (1.43 %) CYTH1 (1.23 %) DAPP1 (1.02 %) PIK3CB (1.02 %) PLEKHA1 (1.02 %) PLEKHA2 (1.02 %) FG…	0.0489991	0.184335	0.655689	0.0489991	0.771565	0.13268	0.137508	0.163586	0.163586	0.200117	0.835207	0.21996	0.394925	0.243545	0.360187	0.460352	0.424573	0.948253	0.292558	0.163586	0.989661	0.430961	0.262311	0.288598	0.870012	0.213401	0.258181	0.296496	0.300412	0.245654	0.926443	0.384706	0.927665	0.98446	0.323456	0.23077	0.988212	0.463356	0.334691
FGFR2 Alternative Splicing	50	27	142974	115.78	113	-0.0105548	0.660588	94.9783	71.6814	FGFR2 (10.84 %) ESRP1 ( 3.68 %) POLR2A ( 3.07 %) NCBP1 ( 2.25 %) TIAL1 ( 2.25 %) ESRP2 ( 2.04 %) GTF2F1 ( 1.43 %) HNRNPA1 ( 1.23 %) HNRNPF ( 1.23 %) PTBP1 ( 1.02 %) HNRNPH1 ( 0.82 %) HNRNPM ( 0.82 %) TIA1 ( 0.82 %) POLR2D ( 0.61 %) RBFOX2 ( 0.61 %) NCBP2 ( 0.41 %) POLR2E ( 0.41 %) POLR2F ( 0.41 %) POLR2H ( 0.41 %) GTF2F2 ( 0.20 %) POLR2C ( 0.20 %) POLR2I ( 0.20 %) POLR2K ( 0.20 %)	0.0249853	0.0975272	0.41549	0.0249853	0.52461	0.0691817	0.0717949	0.0860371	0.0860371	0.106364	0.596705	0.117598	0.223554	0.131138	0.201415	0.267038	0.242953	0.774955	0.159962	0.0860371	0.899997	0.247198	0.142061	0.157597	0.642126	0.113869	0.139646	0.16232	0.164672	0.132358	0.731348	0.216977	0.733604	0.877215	0.178644	0.123779	0.893166	0.269096	0.185543
Cyclin A/B1 Associated Events During G2/M Transition	148	22	108725	96.6289	94	-0.0119794	0.661647	94.9783	72.3404	CCNA1 (3.27 %) PLK1 (2.86 %) WEE1 (2.45 %) CDC25A (2.25 %) CDC25B (1.84 %) XPO1 (1.84 %) CCNB1 (1.64 %) CCNH (1.43 %) CDK1 (1.43 %) FOXM1 (1.43 %) PPP2R2A (1.43 %) CDC25C (1.23 %) PKMYT1 (1.23 %) CCNB2 (1.02 %) CDK2 (1.02 %) CCNA2 (0.82 %) MNAT1 (0.82 %) PPP2R1B (0.82 %) CDK7 (0.61 %) PPP2CA (0.61 %) PPP2CB (0.61 %)	0.0191346	0.0753626	0.33636	0.0191346	0.433226	0.0532689	0.0552991	0.0663873	0.0663873	0.0822837	0.500114	0.0911062	0.175683	0.101774	0.157797	0.211172	0.191456	0.6798	0.124617	0.0663873	0.827632	0.19492	0.110409	0.122736	0.543702	0.0881748	0.108498	0.126494	0.128367	0.102738	0.633432	0.170358	0.635785	0.79839	0.139522	0.0959709	0.818714	0.212864	0.145046
Constitutive Signaling By NOTCH1 HD+PEST Domain Mutants// Constitutive Signaling By NOTCH1 PEST Domain Mutants	269	57	395793	207.498	204	-0.00738388	0.667684	95.46	54.902	EP300 (9.20 %) NCOR2 (6.75 %) NCOR1 (6.34 %) NOTCH1 (5.93 %) HDAC9 (5.32 %) RBPJ (3.89 %) MAMLD1 (3.27 %) JAG1 (3.07 %) HDAC4 (2.86 %) ADAM17 (2.45 %) HDAC5 (2.45 %) KAT2B (2.45 %) MIB1 (2.45 %) TBL1XR1 (2.45 %) JAG2 (2.25 %) MAML1 (2.25 %) HDAC7 (2.04 %) MAML2 (2.04 %) SNW1 (2.04 %) DLL1 (1.84 %) ADAM10 (1.64 %) MIB2 (1.64 %) TBL1X (1.64 %) CDK8 (1.43 %) DLL4 (1.43 %) HDAC6 (1.43 %) HEY1 (1.43 %…	0.0658459	0.241369	0.764378	0.0658459	0.864907	0.175509	0.181726	0.215087	0.215087	0.2612	0.913233	0.285938	0.49396	0.315051	0.454175	0.566684	0.52728	0.981956	0.374516	0.215087	0.997967	0.534382	0.337985	0.369764	0.937098	0.277785	0.332956	0.379232	0.383912	0.317638	0.970933	0.482339	0.971585	0.996468	0.411262	0.299321	0.997572	0.569951	0.424479
FGFR4 Ligand Binding And Activation// Phospholipase C Mediated Cascade; FGFR4	55	15	57069	60.8108	58	-0.0205525	0.696337	99.1584	75.8621	PLCG1 (3.89 %) FGFR4 (2.25 %) KLB (1.64 %) FGF23 (1.43 %) FGF2 (1.02 %) FGF20 (1.02 %) FGF6 (1.02 %) FGF8 (0.82 %) FGF1 (0.61 %) FGF16 (0.61 %) FGF17 (0.61 %) FGF18 (0.61 %) FGF19 (0.20 %) FGF9 (0.20 %)	0.0102163	0.0407908	0.195817	0.0102163	0.260508	0.028676	0.0297836	0.0358531	0.0358531	0.0446137	0.308256	0.0495065	0.0975923	0.0554526	0.087237	0.118455	0.106812	0.454086	0.0682971	0.0358531	0.607206	0.108848	0.0602899	0.0672334	0.341	0.0478784	0.0592171	0.0693595	0.0704208	0.0559913	0.4134	0.0944981	0.415404	0.573088	0.0767629	0.0522139	0.596531	0.11946	0.0799177
Regulation Of Telomerase	217	70	469454	224.435	220	-0.00866711	0.701801	99.5384	55.4545	MTOR (7.98 %) ABL1 (6.34 %) BLM (4.91 %) RAD50 (4.70 %) ESR1 (4.29 %) SIN3A (4.09 %) UBE3A (4.09 %) SMAD3 (3.89 %) ZNFX1 (3.89 %) WRN (3.48 %) RBBP7 (3.27 %) SMG6 (3.07 %) MRE11A (2.86 %) XRCC5 (2.66 %) NCL (2.45 %) AKT1 (2.25 %) NBN (2.25 %) SIN3B (2.25 %) SMG5 (2.25 %) SP3 (2.25 %) NFKB1 (2.04 %) TNKS (2.04 %) HSP90AA1 (1.84 %) HUS1 (1.64 %) PRKCA (1.64 %) RPS6KB1 (1.64 %) TERT (1.64 %) PARP2 (…	0.0760881	0.274541	0.813532	0.0760881	0.902294	0.200865	0.207861	0.24526	0.24526	0.296528	0.941586	0.32382	0.546783	0.355744	0.505127	0.62154	0.581268	0.990579	0.42026	0.24526	0.999255	0.588567	0.380739	0.41514	0.959801	0.314842	0.375269	0.425336	0.430367	0.35857	0.983605	0.534669	0.984032	0.998584	0.459641	0.338522	0.999084	0.624853	0.473709
AUF1 (hnRNP D0) Binds And Destabilizes MRNA// Autodegradation Of The E3 Ubiquitin Ligase COP1// CDK Mediated Phosphorylation And Removal Of Cdc6// CDT1 Association With The CDC6:ORC:origin Complex// Cross Presentation Of Soluble Exogenous Antigens (endosomes)// Dectin 1 Mediated Noncanonical NF KB Signaling// Degradation Of AXIN// Degradation Of DVL// Degradation Of GLI1 By The Proteasome// Degra…	145	162	849029	301.98	297	-0.00722223	0.723601	100	39.7306	RB1 (20.65 %) HECW1 ( 8.38 %) GLI3 ( 7.77 %) CHEK2 ( 5.73 %) GLI2 ( 4.91 %) TNKS2 ( 4.91 %) CHUK ( 4.70 %) GLI1 ( 4.09 %) PSME4 ( 3.89 %) MRC2 ( 3.68 %) CCNA1 ( 3.27 %) DACT1 ( 3.27 %) EIF4G1 ( 3.27 %) GSK3B ( 3.27 %) ORC1 ( 3.27 %) PSMD1 ( 3.07 %) FBXW11 ( 2.86 %) MCM4 ( 2.86 %) PLK1 ( 2.86 %) MCM7 ( 2.66 %) CHEK1 ( 2.45 %) CDC25A ( 2.25 %) DVL2 ( 2.25 %) PAK2 ( 2.25 %) CDC6 ( 2.04 %) HSPA8 ( 2.…	0.137716	0.451689	0.956912	0.137716	0.987152	0.342832	0.353563	0.409525	0.409525	0.482391	0.995096	0.519352	0.77275	0.560961	0.732081	0.837845	0.804046	0.999839	0.639668	0.409525	0.999999	0.810393	0.592312	0.633686	0.997564	0.507334	0.585545	0.645551	0.651339	0.564561	0.999546	0.761244	0.999568	0.999995	0.684133	0.538733	0.999998	0.840493	0.699355
MAP2K And MAPK Activation	78	38	264014	158.642	154	-0.0128982	0.724802	100	57.7922	VWF (6.54 %) IQGAP1 (5.52 %) FGA (4.50 %) KSR2 (4.29 %) TLN1 (4.29 %) APBB1IP (3.89 %) KSR1 (3.68 %) CNKSR2 (3.07 %) ITGB3 (2.66 %) RAF1 (2.66 %) CNKSR1 (2.45 %) ARAF (2.04 %) ITGA2B (2.04 %) MARK3 (1.84 %) IL17RD (1.64 %) VCL (1.64 %) FGG (1.43 %) FGB (1.23 %) CSK (1.02 %) HRAS (0.82 %) SRC (0.82 %) ARRB1 (0.61 %) MAPK1 (0.61 %) MAPK3 (0.61 %) WDR83 (0.61 %) YWHAB (0.61 %) LAMTOR2 (0.41 %) MAP2K…	0.0412433	0.15702	0.590917	0.0412433	0.709979	0.112489	0.116633	0.139079	0.139079	0.170715	0.779436	0.187996	0.343728	0.208629	0.312286	0.403762	0.370795	0.916476	0.251846	0.139079	0.97835	0.376656	0.22512	0.248336	0.819217	0.182276	0.221486	0.255339	0.258815	0.210479	0.887836	0.334449	0.8894	0.969533	0.279337	0.197441	0.975833	0.406546	0.289384
Coregulation Of Androgen Receptor Activity	309	61	443657	227.26	222	-0.01017	0.731682	100	49.0991	PRKDC (14.11 %) SVIL ( 6.54 %) BRCA1 ( 6.34 %) NCOA6 ( 5.73 %) ZNF318 ( 5.73 %) VAV3 ( 5.52 %) AR ( 5.32 %) NCOA2 ( 4.50 %) UBE3A ( 4.09 %) NRIP1 ( 3.48 %) TGIF1 ( 3.48 %) RPS6KA3 ( 3.27 %) APPL1 ( 3.07 %) MED1 ( 2.86 %) PELP1 ( 2.86 %) XRCC5 ( 2.66 %) LATS2 ( 2.45 %) TMF1 ( 2.45 %) ZMIZ1 ( 2.45 %) AKT1 ( 2.25 %) HIP1 ( 2.25 %) KDM3A ( 2.25 %) MAK ( 2.25 %) KDM4C ( 2.04 %) PIAS3 ( 2.04 %) PTK2B (…	0.0778914	0.280267	0.821105	0.0778914	0.907746	0.205277	0.212405	0.250484	0.250484	0.30261	0.945541	0.330321	0.555552	0.362699	0.513647	0.630511	0.590171	0.991604	0.428011	0.250484	0.999376	0.59749	0.388022	0.422834	0.962867	0.321208	0.382483	0.433142	0.438226	0.365563	0.985188	0.543375	0.985583	0.998795	0.46779	0.345237	0.999229	0.633825	0.481984
Oxidative Stress Induced Senescence	212	120	496461	234.508	229	-0.0103218	0.73967	100	50.2183	EZH2 (9.20 %) MAP2K4 (6.95 %) MAP4K4 (4.50 %) TNIK (4.50 %) TNRC6C (4.09 %) KDM6B (3.68 %) AGO1 (3.48 %) MAPK10 (3.48 %) TNRC6A (3.48 %) TNRC6B (3.48 %) RBBP7 (3.27 %) MOV10 (3.07 %) MAP3K5 (2.86 %) MAPK8 (2.86 %) PHC2 (2.86 %) CBX8 (2.66 %) MAPK9 (2.66 %) PHC1 (2.66 %) AGO3 (2.45 %) MAP2K7 (2.25 %) RING1 (2.25 %) AGO4 (2.04 %) TFDP1 (2.04 %) MAP2K3 (1.84 %) MDM2 (1.84 %) MINK1 (1.84 %) MAPK14 (1…	0.0826474	0.295203	0.839699	0.0826474	0.920753	0.216836	0.224306	0.264139	0.264139	0.318455	0.954766	0.347226	0.577951	0.380747	0.535496	0.65324	0.612832	0.99381	0.448028	0.264139	0.99961	0.620183	0.406888	0.442712	0.969901	0.337773	0.401176	0.453294	0.458509	0.383707	0.988677	0.565639	0.988998	0.999215	0.488771	0.362682	0.999512	0.656548	0.503262
Pre NOTCH Transcription And Translation	289	29	320666	188.28	183	-0.0123526	0.739771	100	52.459	EP300 (9.20 %) NOTCH2 (6.54 %) NOTCH1 (5.93 %) NOTCH3 (5.93 %) TNRC6C (4.09 %) RBPJ (3.89 %) NOTCH4 (3.68 %) AGO1 (3.48 %) TNRC6A (3.48 %) TNRC6B (3.48 %) MAMLD1 (3.27 %) MOV10 (3.07 %) AGO3 (2.45 %) KAT2B (2.45 %) MAML1 (2.25 %) AGO4 (2.04 %) MAML2 (2.04 %) SNW1 (2.04 %) TFDP1 (2.04 %) AGO2 (1.43 %) E2F3 (1.23 %) MAML3 (1.23 %) KAT2A (1.02 %) TFDP2 (1.02 %) CCND1 (0.41 %) JUN (0.41 %)	0.0553333	0.206145	0.701216	0.0553333	0.8123	0.148948	0.154314	0.183226	0.183226	0.223526	0.870349	0.245314	0.43404	0.271115	0.397088	0.502863	0.465356	0.965101	0.324389	0.183226	0.994372	0.472077	0.291568	0.320102	0.900909	0.23812	0.287073	0.328648	0.332881	0.273417	0.948017	0.423198	0.948994	0.99107	0.357723	0.257153	0.99347	0.505997	0.369795
Telomere Extension By Telomerase	219	6	25934	33.4098	30	-0.0467531	0.777462	100	93.3333	RUVBL1 (1.84 %) TERT (1.64 %) DKC1 (1.02 %) WRAP53 (1.02 %) RUVBL2 (0.82 %) NHP2 (0.20 %)	0.00493454	0.0198619	0.0996585	0.00493454	0.135306	0.013918	0.0144599	0.0174347	0.0174347	0.0217456	0.162667	0.0241622	0.0482639	0.0271078	0.0430184	0.0589275	0.0529603	0.25292	0.0335035	0.0174347	0.36247	0.0540008	0.0295111	0.0329722	0.182	0.0233574	0.0289776	0.0340346	0.0345654	0.0273751	0.226598	0.0466933	0.227872	0.33637	0.037744	0.0255022	0.354182	0.0594446	0.0393294
FAS (CD95) Signaling Pathway	337	36	252606	156.082	150	-0.0172625	0.779637	100	66.6667	PTPN13 (5.32 %) CHUK (4.70 %) RFC1 (3.68 %) CLTC (3.48 %) MAPK10 (3.48 %) BIRC3 (3.27 %) MAPK8 (2.86 %) MAPK9 (2.66 %) AKT1 (2.25 %) MAP2K7 (2.25 %) BTK (2.04 %) BIRC2 (1.84 %) FAS (1.84 %) SMPD1 (1.84 %) IKBKB (1.64 %) MAPK14 (1.64 %) SYK (1.64 %) CASP10 (1.43 %) FAIM2 (1.23 %) RIPK1 (1.23 %) MAP2K6 (1.02 %) PIK3CB (1.02 %) CASP3 (0.82 %) PDPK1 (0.82 %) SRC (0.82 %) CFLAR (0.61 %) EZR (0.61 %) F…	0.0401403	0.15308	0.580812	0.0401403	0.700011	0.109593	0.113637	0.135552	0.135552	0.166466	0.770144	0.183366	0.336138	0.203558	0.305221	0.395285	0.362786	0.910619	0.245896	0.135552	0.975962	0.368561	0.219706	0.242456	0.810575	0.177771	0.216146	0.249321	0.25273	0.205369	0.880933	0.327011	0.882548	0.966486	0.272864	0.192607	0.973248	0.398031	0.282726
Integrin Linked Kinase Signaling	254	46	312994	189.843	183	-0.0159446	0.793088	100	59.5628	TNS1 (6.54 %) IQGAP1 (5.52 %) ARHGEF7 (4.50 %) RICTOR (4.50 %) ZEB1 (4.50 %) PPP1R12A (3.48 %) GSK3B (3.27 %) PARP1 (3.07 %) ARHGEF6 (2.86 %) ACTN1 (2.66 %) AKT1 (2.25 %) GIT2 (2.25 %) CKAP5 (2.04 %) HSP90AA1 (1.84 %) LEF1 (1.84 %) RUVBL1 (1.84 %) XPO1 (1.84 %) AURKA (1.64 %) ELMO2 (1.64 %) PARVB (1.64 %) TACC3 (1.64 %) PARVG (1.43 %) DIAPH1 (1.23 %) ILKAP (1.23 %) SNAI1 (1.23 %) NCK2 (1.02 %) CD…	0.0561467	0.208914	0.706629	0.0561467	0.816992	0.151023	0.156456	0.185724	0.185724	0.226493	0.874296	0.248521	0.438894	0.274595	0.401686	0.508093	0.470398	0.966829	0.328386	0.185724	0.994796	0.477155	0.295254	0.32406	0.904315	0.241249	0.290714	0.332684	0.336955	0.27692	0.950292	0.427981	0.95124	0.991685	0.362012	0.260487	0.993949	0.511241	0.374183
RAF Activation	110	25	162612	113.851	107	-0.0269519	0.828749	100	61.6822	JAK2 (9.82 %) KSR1 (3.68 %) RAF1 (2.66 %) MAP3K11 (2.45 %) ARAF (2.04 %) PPP2R5A (2.04 %) MARK3 (1.84 %) PPP2R5E (1.43 %) PPP2R5B (1.23 %) PPP2R5D (1.23 %) BRAP (0.82 %) HRAS (0.82 %) PHB (0.82 %) PPP2R1B (0.82 %) PPP2R5C (0.82 %) SRC (0.82 %) PPP2CA (0.61 %) PPP2CB (0.61 %) YWHAB (0.61 %) MAP2K2 (0.41 %)	0.0243587	0.0951728	0.407466	0.0243587	0.515549	0.0674858	0.0700375	0.0839471	0.0839471	0.103809	0.587299	0.114791	0.218549	0.128031	0.196841	0.261234	0.237585	0.76627	0.156236	0.0839471	0.893976	0.241751	0.138717	0.153921	0.632666	0.111145	0.136354	0.158545	0.160847	0.129225	0.722231	0.212099	0.724505	0.870499	0.17453	0.120834	0.886924	0.263255	0.181288
Regulation Of TP53 Degradation	171	35	270053	162.862	155	-0.0214885	0.834212	100	65.8065	MTOR (7.98 %) CHEK2 (5.73 %) RICTOR (4.50 %) USP7 (4.29 %) DAXX (3.48 %) CCNA1 (3.27 %) AKT1 (2.25 %) AKT3 (1.84 %) MDM2 (1.84 %) SGK1 (1.84 %) USP2 (1.84 %) AKT2 (1.64 %) CDK1 (1.43 %) UBC (1.43 %) MAPKAP1 (1.23 %) MDM4 (1.23 %) CCNG1 (1.02 %) CDK2 (1.02 %) CDKN2A (1.02 %) CCNA2 (0.82 %) PDPK1 (0.82 %) PPP2R1B (0.82 %) PPP2R5C (0.82 %) RNF34 (0.82 %) PPP2CA (0.61 %) PPP2CB (0.61 %) PRR5 (0.61 %)…	0.0431001	0.163621	0.607405	0.0431001	0.72604	0.11735	0.12166	0.144993	0.144993	0.177829	0.794259	0.195742	0.356327	0.217106	0.324035	0.417785	0.38407	0.925495	0.26177	0.144993	0.981851	0.390071	0.234164	0.258148	0.832903	0.189815	0.230405	0.265375	0.268963	0.21902	0.898581	0.346805	0.900059	0.974055	0.290122	0.205524	0.979638	0.420628	0.30047
Signaling By FGFR1 In Disease	119	33	251575	156.78	149	-0.0221037	0.834444	100	64.4295	CNTRL (4.09 %) FGFR1 (3.89 %) PLCG1 (3.89 %) TRIM24 (3.89 %) MYO18A (3.68 %) CUX1 (3.27 %) GAB1 (3.27 %) SOS1 (3.07 %) ZMYM2 (3.07 %) LRRFIP1 (2.86 %) BCR (2.25 %) GRB2 (2.25 %) BAG4 (2.04 %) CPSF6 (2.04 %) FGF23 (1.43 %) FGF5 (1.43 %) FGF2 (1.02 %) FGF20 (1.02 %) FGF6 (1.02 %) FRS2 (1.02 %) FGF8 (0.82 %) HRAS (0.82 %) FGF1 (0.61 %) FGF17 (0.61 %) FGFR1OP (0.61 %) FGFR1OP2 (0.61 %) ERLIN2 (0.41 %…	0.0404391	0.154148	0.583572	0.0404391	0.702743	0.110378	0.114449	0.136509	0.136509	0.167618	0.772698	0.184622	0.338202	0.204934	0.307141	0.397592	0.364964	0.912244	0.247512	0.136509	0.976633	0.370763	0.221176	0.244052	0.812955	0.178993	0.217596	0.250955	0.254383	0.206755	0.882843	0.329033	0.884444	0.96734	0.274622	0.193919	0.973974	0.400349	0.284535
Insulin Receptor Signaling ( Insulin Receptor Signaling (D. Melanogaster) )// Insulin Receptor Signaling (Mammal) ( Insulin Receptor Signaling (Mammal) )	69	62	435972	209.425	201	-0.0178323	0.834925	100	50.2488	MTOR (7.98 %) IRS4 (6.13 %) IRS1 (4.50 %) RPTOR (4.50 %) INSR (4.29 %) TSC2 (3.48 %) GSK3B (3.27 %) PRKAA2 (3.27 %) PPP2R3A (3.07 %) SOS1 (3.07 %) RAF1 (2.66 %) PPP2R2C (2.45 %) SHC1 (2.45 %) AKT1 (2.25 %) GRB2 (2.25 %) PIK3CD (2.25 %) PPP2R2B (2.25 %) ARAF (2.04 %) PPP2R5A (2.04 %) PRKAA1 (2.04 %) AKT3 (1.84 %) AKT2 (1.64 %) FKBP8 (1.64 %) SLC2A4 (1.64 %) PPP2R5E (1.43 %) PRKAG2 (1.43 %) IRS2 (1…	0.0669635	0.245043	0.770289	0.0669635	0.869577	0.178301	0.184605	0.218421	0.218421	0.265121	0.916882	0.290152	0.499981	0.319591	0.459952	0.573006	0.533464	0.983185	0.379653	0.218421	0.998177	0.540595	0.342767	0.374857	0.940083	0.281904	0.337686	0.384412	0.389134	0.322206	0.972685	0.488295	0.973309	0.996802	0.416719	0.303688	0.997815	0.576282	0.43004
Insulin Pathway	360	47	311648	181.195	173	-0.0201013	0.8367	100	49.1329	CBL (7.98 %) IRS1 (4.50 %) PRKCI (4.50 %) INSR (4.29 %) EXOC4 (3.89 %) RAPGEF1 (3.89 %) RASA1 (3.89 %) EXOC1 (3.27 %) GRB14 (3.07 %) SOS1 (3.07 %) EXOC6 (2.86 %) INPP5D (2.66 %) SHC1 (2.45 %) SORBS1 (2.45 %) AKT1 (2.25 %) GRB2 (2.25 %) PTPN1 (1.84 %) SGK1 (1.84 %) AKT2 (1.64 %) EXOC2 (1.64 %) F2RL2 (1.64 %) RPS6KB1 (1.64 %) SCNN1A (1.64 %) EXOC5 (1.23 %) EXOC8 (1.23 %) PTPRA (1.23 %) DOK1 (1.02 %…	0.0517384	0.193822	0.676135	0.0517384	0.790133	0.13974	0.144803	0.172121	0.172121	0.210307	0.851414	0.231007	0.412129	0.255571	0.376384	0.47913	0.442545	0.956344	0.306477	0.172121	0.992048	0.449087	0.275085	0.302371	0.884382	0.224168	0.270793	0.310559	0.314616	0.257765	0.936679	0.401627	0.937791	0.987765	0.338466	0.242271	0.990865	0.482196	0.350077
ERK Cascade ( CD4 T Cell Receptor Signaling (ERK Cascade) )	40	10	74162	66.1118	60	-0.0421275	0.845632	100	85	MAPK10 (3.48 %) MAPK8 (2.86 %) MAPK9 (2.66 %) RAF1 (2.66 %) ARAF (2.04 %) MAPK1 (0.61 %) MAPK3 (0.61 %) MAP2K2 (0.41 %)	0.0113837	0.0453707	0.215708	0.0113837	0.285716	0.0319184	0.0331491	0.0398902	0.0398902	0.0496116	0.336942	0.0550366	0.108179	0.0616251	0.0967619	0.131136	0.118332	0.49077	0.0758409	0.0398902	0.647203	0.120572	0.0669814	0.0746645	0.371838	0.0532317	0.0657938	0.0770158	0.0781892	0.0622217	0.448279	0.104769	0.450381	0.612871	0.0851983	0.0580371	0.636497	0.13224	0.0886828
HDACs Deacetylate Histones	252	94	308405	177.849	169	-0.0221636	0.855618	100	56.213	NCOR2 (6.75 %) NCOR1 (6.34 %) CHD3 (4.91 %) ARID4A (3.48 %) RBBP7 (3.27 %) REST (3.27 %) ARID4B (2.86 %) TBL1XR1 (2.45 %) MTA2 (2.25 %) PHF21A (2.25 %) GATAD2A (2.04 %) MTA1 (1.84 %) TBL1X (1.64 %) KDM1A (1.43 %) HDAC2 (1.23 %) HIST2H2AC (1.23 %) MTA3 (1.23 %) GATAD2B (1.02 %) GPS2 (1.02 %) HDAC1 (1.02 %) HIST1H2BA (1.02 %) HIST1H3B (1.02 %) HIST1H3D (1.02 %) HIST1H4L (1.02 %) RCOR1 (1.02 %) HIST…	0.0500906	0.188126	0.663979	0.0500906	0.779147	0.135498	0.14042	0.166995	0.166995	0.20419	0.841861	0.224377	0.401834	0.248356	0.366686	0.467908	0.431797	0.95164	0.298133	0.166995	0.990687	0.438248	0.267423	0.294114	0.875935	0.217705	0.263228	0.302129	0.306102	0.250499	0.930703	0.391499	0.93188	0.985871	0.329472	0.23537	0.98935	0.470938	0.34086
Regulation Of TP53 Activity Through Acetylation	167	23	203598	145.782	137	-0.0269828	0.867644	100	66.4234	EP300 (9.20 %) KAT6A (5.52 %) CHD3 (4.91 %) RBBP7 (3.27 %) BRD1 (2.86 %) BRPF1 (2.86 %) BRPF3 (2.66 %) AKT1 (2.25 %) MTA2 (2.25 %) PML (2.25 %) BRD7 (2.04 %) GATAD2A (2.04 %) AKT3 (1.84 %) AKT2 (1.64 %) HDAC2 (1.23 %) MEAF6 (1.23 %) GATAD2B (1.02 %) HDAC1 (1.02 %) ING5 (0.82 %) RBBP4 (0.82 %) MBD3 (0.41 %)	0.0358772	0.137721	0.539475	0.0358772	0.658282	0.0983424	0.101995	0.121824	0.121824	0.149886	0.730519	0.165275	0.306058	0.183706	0.277306	0.361471	0.330954	0.883938	0.222519	0.121824	0.964021	0.336364	0.198483	0.219357	0.773224	0.160177	0.195223	0.225669	0.228806	0.185362	0.850113	0.297554	0.851927	0.951611	0.247364	0.173704	0.96042	0.364058	0.256475
FGFRL1 Modulation Of FGFR1 Signaling	56	13	49940	54.3973	48	-0.054336	0.872915	100	81.25	SPRED2 (2.04 %) SPRED1 (1.64 %) FGF23 (1.43 %) FGF5 (1.43 %) FGF10 (1.02 %) FGF2 (1.02 %) FGF3 (1.02 %) FGF8 (0.82 %) FGF17 (0.61 %) FGF18 (0.61 %) FGFRL1 (0.41 %) FGF22 (0.20 %)	0.00886951	0.0354863	0.172272	0.00886951	0.230357	0.0249265	0.0258912	0.0311803	0.0311803	0.0388222	0.27366	0.0430943	0.0852375	0.04829	0.0761373	0.103614	0.093351	0.408528	0.0595282	0.0311803	0.555465	0.0951442	0.05252	0.0585968	0.303584	0.0416724	0.0515816	0.0604587	0.0613883	0.0487609	0.370467	0.0825169	0.372334	0.522152	0.0669466	0.0454595	0.545003	0.1045	0.0697133
Downstream Signaling Of Activated FGFR1	26	18	104898	96.8765	89	-0.0368285	0.87317	100	79.7753	FLRT2 (4.91 %) FGFR1 (3.89 %) KL (2.66 %) FLRT1 (2.45 %) FGF23 (1.43 %) FGF5 (1.43 %) FLRT3 (1.43 %) FGF10 (1.02 %) FGF2 (1.02 %) FGF20 (1.02 %) FGF3 (1.02 %) FGF6 (1.02 %) FGF8 (0.82 %) FGF1 (0.61 %) FGF17 (0.61 %) FGF22 (0.20 %) FGF9 (0.20 %)	0.0192052	0.0756322	0.337372	0.0192052	0.434423	0.0534618	0.0554991	0.066626	0.066626	0.082577	0.501403	0.0914293	0.176276	0.102133	0.158335	0.211869	0.192096	0.681155	0.125051	0.066626	0.828757	0.19557	0.110797	0.123163	0.545033	0.0884881	0.108879	0.126934	0.128813	0.1031	0.634798	0.170934	0.637151	0.799588	0.140003	0.0963103	0.819863	0.213565	0.145544
ERK Cascade ( FGF8 Signaling (Mouse) )// ERK Cascade ( FGF8 Signaling (Xenopus) )	42	17	108400	91.9253	84	-0.0391556	0.878587	100	72.619	ERG (2.86 %) ETV5 (2.86 %) RAF1 (2.66 %) ETV6 (2.25 %) ARAF (2.04 %) ETS1 (2.04 %) FLI1 (1.84 %) ELK3 (1.43 %) ELK1 (1.02 %) ELK4 (1.02 %) ETS2 (1.02 %) SPI1 (1.02 %) MAPK1 (0.61 %) MAPK3 (0.61 %) MAP2K2 (0.41 %)	0.017819	0.0703227	0.317211	0.017819	0.410455	0.0496667	0.0515633	0.0619273	0.0619273	0.0768004	0.47548	0.0850627	0.16456	0.0950606	0.147703	0.198084	0.179447	0.653476	0.116497	0.0619273	0.805272	0.182719	0.103159	0.11473	0.518176	0.0823168	0.101366	0.11826	0.12002	0.0959641	0.607	0.159538	0.609349	0.774699	0.130505	0.0896208	0.795913	0.199684	0.1357
Regulation Of TP53 Activity Through Association With Co Factors	168	14	102022	94.0785	86	-0.038992	0.881152	100	69.7674	TP63 (4.29 %) POU4F2 (3.27 %) TP53BP2 (2.86 %) AKT1 (2.25 %) PHF20 (2.04 %) PPP1R13B (2.04 %) AKT3 (1.84 %) AKT2 (1.64 %) BANP (1.64 %) ZNF385A (1.64 %) TP73 (1.23 %) PPP1R13L (1.02 %) POU4F1 (0.61 %)	0.0184156	0.0726104	0.325958	0.0184156	0.420887	0.0513011	0.0532584	0.0639515	0.0639515	0.0792898	0.486793	0.0878069	0.16962	0.0981097	0.152293	0.204043	0.184912	0.665666	0.120187	0.0639515	0.815746	0.188272	0.106453	0.118368	0.529918	0.0849766	0.104605	0.122002	0.123813	0.0990405	0.619209	0.16446	0.621561	0.785764	0.134603	0.0925045	0.806583	0.205685	0.139949
CD28 Dependent PI3K/Akt Signaling	12	22	160289	116.69	108	-0.0336108	0.881547	100	74.0741	MTOR (7.98 %) RICTOR (4.50 %) FYN (3.48 %) AKT1 (2.25 %) AKT3 (1.84 %) LCK (1.84 %) AKT2 (1.64 %) CD80 (1.23 %) MAPKAP1 (1.23 %) PIK3R3 (1.02 %) CD28 (0.82 %) PDPK1 (0.82 %) TRIB3 (0.82 %) MAP3K8 (0.61 %) PIK3R2 (0.61 %) PRR5 (0.61 %) THEM4 (0.61 %) CD86 (0.41 %) MLST8 (0.41 %)	0.025284	0.0986477	0.419277	0.025284	0.528871	0.0699892	0.0726317	0.0870321	0.0870321	0.10758	0.601115	0.118934	0.225928	0.132615	0.203586	0.26979	0.2455	0.778983	0.161733	0.0870321	0.902746	0.249782	0.143651	0.159344	0.64655	0.115165	0.141211	0.164114	0.16649	0.133848	0.735589	0.219292	0.737836	0.880293	0.180599	0.125179	0.89602	0.271865	0.187564
TP53 Regulates Transcription Of Several Additional Cell Death Genes Whose Specific Roles In P53 Dependent Apoptosis Remain Uncertain	188	14	83208	80.7977	73	-0.0440761	0.884901	100	73.9726	TP63 (4.29 %) BCL6 (3.07 %) TP53BP2 (2.86 %) PPP1R13B (2.04 %) RABGGTA (1.84 %) RABGGTB (1.84 %) TP73 (1.23 %) BCL2L14 (1.02 %) CHM (1.02 %) NDRG1 (0.61 %) BIRC5 (0.41 %) TP53I3 (0.41 %) PERP (0.20 %)	0.0148867	0.0590145	0.272618	0.0148867	0.356473	0.0416057	0.0432015	0.0519313	0.0519313	0.0644871	0.41625	0.0714765	0.13928	0.0799483	0.124816	0.168188	0.152093	0.586907	0.0981648	0.0519313	0.744586	0.154914	0.0868222	0.0966607	0.456165	0.0691525	0.0852991	0.0996665	0.101166	0.0807146	0.541178	0.134966	0.543466	0.711545	0.110108	0.075337	0.734385	0.169573	0.114546
Trk Receptor Signaling Mediated By PI3K And PLC Gamma	136	36	228615	145.736	136	-0.030029	0.891048	100	51.4706	TRPC3 (4.70 %) PLCG1 (3.89 %) GAB1 (3.27 %) GSK3B (3.27 %) SOS1 (3.07 %) NTRK1 (2.86 %) PRKCD (2.86 %) EPB41L1 (2.66 %) EGR1 (2.45 %) SHC1 (2.45 %) AKT1 (2.25 %) GRB2 (2.25 %) AGAP2 (2.04 %) CAMK4 (2.04 %) STAT5A (1.84 %) NGF (1.23 %) YWHAH (1.02 %) CAMK2A (0.82 %) FOXO3 (0.82 %) HRAS (0.82 %) PDPK1 (0.82 %) SRC (0.82 %) YWHAE (0.82 %) CREB1 (0.61 %) YWHAB (0.61 %) YWHAZ (0.61 %) CCND1 (0.41 %) B…	0.035859	0.137655	0.53929	0.035859	0.658093	0.0982941	0.101945	0.121765	0.121765	0.149815	0.730337	0.165197	0.305926	0.183621	0.277185	0.361323	0.330815	0.883809	0.222418	0.121765	0.96396	0.336224	0.198392	0.219257	0.77305	0.160101	0.195133	0.225567	0.228703	0.185275	0.849966	0.297426	0.851781	0.951535	0.247254	0.173623	0.960354	0.363909	0.256361
AndrogenReceptor	303	167	1169403	340.738	330	-0.0139067	0.89849	100	33.9394	RB1 (20.65 %) EP300 ( 9.20 %) NCOR2 ( 6.75 %) SVIL ( 6.54 %) BRCA1 ( 6.34 %) NCOR1 ( 6.34 %) FLNA ( 6.13 %) NCOA6 ( 5.73 %) AR ( 5.32 %) NSD1 ( 4.91 %) WHSC1 ( 4.70 %) NCOA2 ( 4.50 %) ESR1 ( 4.29 %) PTK2 ( 4.09 %) SIN3A ( 4.09 %) UBE3A ( 4.09 %) BRINP1 ( 3.89 %) ERCC3 ( 3.89 %) SMAD3 ( 3.89 %) RBAK ( 3.68 %) DAXX ( 3.48 %) NCOA3 ( 3.48 %) NRIP1 ( 3.48 %) TGIF1 ( 3.48 %) CEBPA ( 3.27 %) GSK3B ( 3.…	0.181743	0.556678	0.985831	0.181743	0.997246	0.433516	0.446001	0.509911	0.509911	0.589944	0.999252	0.629073	0.865446	0.671864	0.831854	0.914792	0.8899	0.999993	0.748865	0.509911	1	0.8947	0.703176	0.743205	0.99971	0.616463	0.696486	0.7544	0.759813	0.6755	0.99997	0.856142	0.999972	1	0.789876	0.649175	1	0.91667	0.803465
VEGF Ligand Receptor Interactions	296	5	26511	34.048	28	-0.084934	0.903085	100	89.2857	VEGFC (2.86 %) FIGF (1.23 %) VEGFA (1.02 %) PGF (0.61 %) VEGFB (0.61 %)	0.00504405	0.0202993	0.101759	0.00504405	0.138098	0.0142255	0.0147792	0.0178191	0.0178191	0.022224	0.165968	0.0246931	0.0493108	0.0277025	0.0439542	0.0601983	0.0541062	0.257751	0.034236	0.0178191	0.368824	0.0551685	0.0301577	0.0336933	0.185648	0.0238708	0.0296126	0.0347785	0.0353207	0.0279756	0.231007	0.047707	0.232302	0.342397	0.0385673	0.0260622	0.360434	0.0607262	0.0401866
CREB Phosphorylation Through The Activation Of Ras	23	13	100216	88.8724	80	-0.0456769	0.906067	100	70	RPS6KA2 (4.91 %) RPS6KA6 (3.68 %) RPS6KA3 (3.27 %) RAF1 (2.66 %) CAMK2G (2.25 %) RPS6KA1 (1.84 %) CAMK2D (1.64 %) CAMK2A (0.82 %) CAMK2B (0.82 %) CREB1 (0.61 %) MAPK1 (0.61 %) RRAS (0.41 %)	0.0169897	0.0671349	0.30487	0.0169897	0.395648	0.0473913	0.0492033	0.0591079	0.0591079	0.0733307	0.459348	0.0812364	0.157479	0.0908073	0.141284	0.18973	0.171793	0.6358	0.111345	0.0591079	0.789726	0.174941	0.0985638	0.109651	0.501374	0.0786087	0.0968459	0.113035	0.114722	0.0916724	0.589387	0.152653	0.591725	0.758372	0.124778	0.0855992	0.780105	0.191271	0.129763
Senescence Associated Secretory Phenotype (SASP)	218	108	348601	190.356	179	-0.0267136	0.907525	100	55.3073	RPS6KA2 (4.91 %) CCNA1 (3.27 %) RPS6KA3 (3.27 %) CDC27 (2.86 %) ANAPC4 (2.45 %) EHMT1 (2.25 %) CDC23 (2.04 %) EHMT2 (2.04 %) NFKB1 (2.04 %) STAT3 (2.04 %) RELA (1.84 %) RPS6KA1 (1.84 %) ANAPC1 (1.43 %) ANAPC2 (1.43 %) ANAPC5 (1.43 %) IL6 (1.43 %) UBC (1.43 %) ANAPC7 (1.23 %) CXCL8 (1.23 %) HIST2H2AC (1.23 %) MAPK7 (1.23 %) CDC16 (1.02 %) CDK2 (1.02 %) CDKN2A (1.02 %) FOS (1.02 %) HIST1H2BA (1.02 …	0.0564149	0.209825	0.708393	0.0564149	0.818514	0.151706	0.157162	0.186547	0.186547	0.227469	0.875571	0.249577	0.440486	0.275739	0.403196	0.509807	0.472051	0.96738	0.329699	0.186547	0.994929	0.47882	0.296466	0.325361	0.905413	0.242279	0.291912	0.33401	0.338294	0.278072	0.95102	0.429551	0.951959	0.991879	0.36342	0.261584	0.994099	0.512959	0.375624
PDGFR Beta Signaling Pathway	96	125	847363	299.87	288	-0.0175399	0.909147	100	40.2778	JAK2 (9.82 %) CBL (7.98 %) LRP1 (7.36 %) MAP2K4 (6.95 %) PIK3CG (6.95 %) ABL1 (6.34 %) IQGAP1 (5.52 %) DOCK4 (4.50 %) ARHGAP35 (4.29 %) PDGFRB (4.09 %) PLCG1 (3.89 %) RAPGEF1 (3.89 %) RASA1 (3.89 %) STAT5B (3.89 %) VAV2 (3.89 %) KSR1 (3.68 %) FYN (3.48 %) MAPK10 (3.48 %) MYOCD (3.48 %) ARAP1 (3.27 %) DNM2 (3.27 %) GAB1 (3.27 %) HCK (3.27 %) ITGAV (3.27 %) MLLT4 (3.27 %) PTPRJ (3.27 %) RPS6KA3 (3.…	0.135634	0.446302	0.95465	0.135634	0.986209	0.338328	0.348958	0.404442	0.404442	0.476815	0.994653	0.513588	0.767204	0.555042	0.726277	0.832973	0.79878	0.999814	0.633633	0.404442	0.999998	0.805193	0.586317	0.627652	0.997313	0.501627	0.579562	0.639519	0.64531	0.55863	0.999485	0.755614	0.999509	0.999994	0.678155	0.532889	0.999997	0.835657	0.693418
NADE Modulates Death Signalling	341	6	24887	32.2424	26	-0.0934543	0.91482	100	76.9231	CASP2 (1.64 %) NGFR (1.64 %) NGF (1.23 %) CASP3 (0.82 %) YWHAE (0.82 %) NGFRAP1 (0.61 %)	0.00473579	0.0190678	0.0958345	0.00473579	0.130216	0.0133599	0.0138802	0.0167367	0.0167367	0.020877	0.156644	0.0231982	0.0463613	0.0260278	0.0413181	0.0566172	0.0508776	0.244074	0.0321729	0.0167367	0.350778	0.0518783	0.0283368	0.0316623	0.175339	0.0224251	0.0278241	0.0326833	0.0331934	0.0262846	0.218533	0.0448512	0.219769	0.325293	0.0362482	0.0244854	0.342681	0.0571147	0.037772
Interferon Alpha/beta Signaling	228	67	332128	195.251	183	-0.0281425	0.921915	100	55.7377	JAK1 (4.09 %) HLA-A (3.68 %) IFITM3 (3.68 %) STAT1 (3.27 %) OAS2 (3.07 %) ADAR (2.86 %) RNASEL (2.86 %) SAMHD1 (2.86 %) EGR1 (2.45 %) HLA-B (2.45 %) HLA-G (2.45 %) STAT2 (2.25 %) IFNA2 (2.04 %) MX1 (2.04 %) IFIT1 (1.84 %) MX2 (1.84 %) OAS1 (1.84 %) PSMB8 (1.84 %) HLA-C (1.64 %) IFIT2 (1.64 %) IFNA1 (1.64 %) IFNAR1 (1.64 %) IRF2 (1.64 %) IFI35 (1.43 %) OAS3 (1.43 %) BST2 (1.23 %) IRF1 (1.23 %) IRF…	0.059016	0.218622	0.724985	0.059016	0.832656	0.158315	0.163985	0.194492	0.194492	0.236889	0.887307	0.259749	0.45572	0.286762	0.417662	0.526142	0.487841	0.972278	0.342326	0.194492	0.996056	0.494718	0.308128	0.337866	0.915444	0.252206	0.303436	0.346756	0.351156	0.289168	0.957563	0.444572	0.958415	0.99354	0.376942	0.272152	0.995377	0.529334	0.389448
Pre NOTCH Processing In Golgi	287	18	175402	138.17	127	-0.0366108	0.92381	100	57.4803	NOTCH2 (6.54 %) NOTCH1 (5.93 %) NOTCH3 (5.93 %) ATP2A1 (4.29 %) NOTCH4 (3.68 %) ATP2A2 (3.27 %) FURIN (3.07 %) ATP2A3 (2.66 %) ST3GAL6 (2.66 %) ST3GAL3 (2.25 %) B4GALT1 (1.43 %) SEL1L (1.23 %) LFNG (0.82 %) RAB6A (0.82 %) TMED2 (0.82 %) ST3GAL4 (0.61 %) MFNG (0.20 %) RFNG (0.20 %)	0.0329034	0.126883	0.50837	0.0329034	0.62591	0.0904401	0.0938151	0.112155	0.112155	0.13817	0.699026	0.152467	0.284353	0.16962	0.257249	0.336865	0.3079	0.860835	0.205848	0.112155	0.952383	0.313027	0.183395	0.20289	0.743011	0.147728	0.180354	0.208795	0.211731	0.171162	0.82411	0.276328	0.826061	0.937538	0.229118	0.160307	0.948037	0.339325	0.237667
AKT(PKB) GSK3beta Signaling ( Insulin Receptor Signaling (D. Melanogaster) )// AKT(PKB) GSK3beta Signaling ( Insulin Receptor Signaling (Mammal) )	351	6	51109	58.398	50	-0.0674282	0.925757	100	80	GSK3B (3.3 %) GYS2 (3.3 %) AKT1 (2.2 %) AKT3 (1.8 %) AKT2 (1.6 %) GYS1 (1.2 %)	0.00970137	0.0387652	0.186891	0.00970137	0.249116	0.0272434	0.0282965	0.0340683	0.0340683	0.0424025	0.295221	0.0470588	0.0928862	0.0527191	0.083007	0.112807	0.101686	0.437089	0.0649525	0.0340683	0.588166	0.10363	0.0573253	0.0639391	0.326931	0.0455092	0.0563036	0.0659648	0.066976	0.053232	0.397334	0.0899336	0.399289	0.554279	0.0730202	0.0496358	0.577548	0.113768	0.0760276
Insulin Processing	361	26	170405	131.15	120	-0.0385871	0.926754	100	61.6667	MYO5A (4.91 %) EXOC4 (3.89 %) PCSK1 (3.89 %) KIF5B (3.48 %) SLC30A8 (3.48 %) EXOC1 (3.27 %) KIF5A (3.27 %) EXOC6 (2.86 %) CPE (1.84 %) PCSK2 (1.84 %) EXOC2 (1.64 %) KIF5C (1.64 %) CPN1 (1.43 %) ERO1B (1.43 %) EXOC5 (1.23 %) EXOC8 (1.23 %) ERO1A (0.82 %) EXOC7 (0.82 %) SLC30A5 (0.82 %) SLC30A6 (0.82 %) STX1A (0.82 %) EXOC3 (0.61 %) RAB27A (0.61 %) VAMP2 (0.20 %)	0.0302898	0.117274	0.47939	0.0302898	0.595031	0.0834583	0.0865853	0.103594	0.103594	0.12777	0.668415	0.141082	0.264776	0.157076	0.239215	0.314523	0.287046	0.836839	0.190945	0.103594	0.939128	0.291902	0.16994	0.188175	0.713242	0.136667	0.167098	0.193705	0.196456	0.158515	0.79764	0.257199	0.799704	0.921879	0.212766	0.148389	0.934037	0.316862	0.220796
TGF Beta Receptor	176	220	1547821	374.468	363	-0.0135079	0.92738	100	27.5482	RB1 (20.65 %) EP300 ( 9.20 %) MTOR ( 7.98 %) STK11 ( 7.16 %) BRCA1 ( 6.34 %) CTNNA2 ( 5.93 %) ROCK1 ( 5.52 %) AR ( 5.32 %) ZEB2 ( 5.32 %) SPTBN1 ( 5.11 %) CTNNA1 ( 4.91 %) CHUK ( 4.70 %) RBL2 ( 4.70 %) ZEB1 ( 4.50 %) ESR1 ( 4.29 %) ERBB2IP ( 4.09 %) NUP214 ( 4.09 %) PTK2 ( 4.09 %) XPO4 ( 4.09 %) ZFYVE9 ( 4.09 %) SMAD3 ( 3.89 %) TRIM33 ( 3.89 %) RBL1 ( 3.68 %) WWP1 ( 3.68 %) ZFYVE16 ( 3.68 %) DAXX…	0.232407	0.657909	0.996351	0.232407	0.999579	0.527352	0.541041	0.60954	0.60954	0.691347	0.999925	0.729582	0.928992	0.769942	0.904733	0.961126	0.945495	1	0.838312	0.60954	1	0.948606	0.79844	0.833489	0.999978	0.717394	0.792429	0.842994	0.847541	0.773297	0.999999	0.922447	0.999999	1	0.872188	0.748737	1	0.962252	0.882974
Pre NOTCH Processing In The Endoplasmic Reticulum	288	6	110265	102.4	92	-0.0465116	0.928888	100	79.3478	NOTCH2 (6.54 %) NOTCH1 (5.93 %) NOTCH3 (5.93 %) NOTCH4 (3.68 %) POFUT1 (0.82 %) POGLUT1 (0.82 %)	0.0208127	0.0817614	0.360043	0.0208127	0.461042	0.0578509	0.0600501	0.0720541	0.0720541	0.0892413	0.529909	0.0987688	0.189678	0.110278	0.170519	0.227583	0.206543	0.710541	0.134882	0.0720541	0.852503	0.210243	0.119586	0.132858	0.574354	0.0956041	0.117526	0.136902	0.138916	0.111317	0.664628	0.183977	0.666971	0.825067	0.150906	0.104019	0.844176	0.229386	0.156838
Glycolysis / Gluconeogenesis	356	49	209810	147.912	136	-0.036464	0.93217	100	55.8824	HK3 (4.09 %) OGDHL (3.27 %) OGDH (3.07 %) PFKP (3.07 %) HKDC1 (2.86 %) HK1 (2.66 %) ADH1B (2.25 %) ALDH3A2 (2.25 %) PKLR (2.25 %) DLAT (2.04 %) ACSS2 (1.84 %) NME7 (1.84 %) PGM1 (1.84 %) ADH6 (1.64 %) PGK2 (1.64 %) ADH7 (1.43 %) ALDH3A1 (1.43 %) LDHAL6A (1.43 %) ADH5 (1.23 %) ENO3 (1.23 %) GCK (1.23 %) GPI (1.23 %) HK2 (1.23 %) ADH1A (1.02 %) G6PC (1.02 %) PCK2 (1.02 %) ADPGK (0.82 %) DLD (0.82 %…	0.036736	0.140832	0.548103	0.036736	0.667116	0.100616	0.104349	0.124602	0.124602	0.153247	0.739002	0.168945	0.312214	0.187738	0.283009	0.36842	0.337481	0.889877	0.227278	0.124602	0.966824	0.342968	0.202797	0.224058	0.781284	0.163745	0.199475	0.230485	0.233678	0.189425	0.856893	0.30358	0.858668	0.955056	0.252563	0.177541	0.963418	0.371041	0.26183
P53 Pathway Feedback Loops 1	163	6	47373	50.7266	42	-0.0819861	0.943191	100	90.4762	TP63 (4.3 %) MDM2 (1.8 %) MDM4 (1.2 %) RFWD2 (1.2 %) TP73 (1.2 %)	0.00813004	0.0325646	0.159066	0.00813004	0.213301	0.0228638	0.0237497	0.0286078	0.0286078	0.0356309	0.253956	0.0395591	0.0783896	0.0443385	0.0699923	0.0953678	0.0858823	0.381946	0.0546838	0.0286078	0.524247	0.0875391	0.0482312	0.053826	0.282168	0.0382515	0.0473675	0.0555409	0.0563971	0.0447718	0.3456	0.0758784	0.347378	0.49168	0.0615185	0.0417345	0.513998	0.0961879	0.0640687
Ras Signaling In The CD4+ TCR Pathway	116	14	87928	67.7893	58	-0.0677333	0.944102	100	86.2069	PRKCB (5.11 %) RAF1 (2.66 %) PRKCA (1.64 %) ELK1 (1.02 %) FOS (1.02 %) HRAS (0.82 %) PTPN7 (0.82 %) MAP3K8 (0.61 %) MAPK1 (0.61 %) MAPK3 (0.61 %)	0.0117636	0.0468575	0.222079	0.0117636	0.293738	0.0329721	0.0342427	0.0412014	0.0412014	0.0512337	0.346025	0.0568307	0.1116	0.0636266	0.0998425	0.135226	0.122051	0.502177	0.0782846	0.0412014	0.659329	0.124357	0.0691505	0.0770719	0.381567	0.0549687	0.0679258	0.0794957	0.0807052	0.064242	0.459185	0.108089	0.461314	0.62501	0.0879289	0.0599258	0.648638	0.136363	0.0915194
Mitochondrial Beta Oxidation Of Short Chain Saturated Fatty Acids// Short Chain 3 Hydroxyacyl CoA Dehydrogenase Deficiency (SCHAD)	369	8	37775	45.8365	37	-0.0930093	0.952226	100	94.5946	ACSS3 (1.84 %) ACAA2 (1.02 %) ACADL (1.02 %) ACAT1 (1.02 %) ECHS1 (1.02 %) ACADS (0.82 %) HSD17B10 (0.82 %) HADH (0.41 %)	0.00717946	0.0287989	0.141796	0.00717946	0.190839	0.0202082	0.0209923	0.0252936	0.0252936	0.0315165	0.227862	0.0349993	0.0695189	0.0392391	0.0620396	0.0846655	0.0761993	0.346044	0.0484251	0.0252936	0.480915	0.0776772	0.0426942	0.047663	0.253692	0.0338398	0.0419275	0.0491866	0.0499475	0.0396236	0.312214	0.0672814	0.313864	0.449674	0.0545002	0.0369288	0.471056	0.085398	0.0567684
TNFalpha	344	274	1805329	394.407	382	-0.0138809	0.952504	100	23.5602	RB1 (20.65 %) EP300 ( 9.20 %) MTOR ( 7.98 %) FANCD2 ( 7.77 %) PEG3 ( 7.57 %) ERBB2 ( 7.36 %) TNFAIP3 ( 7.36 %) MAP2K4 ( 6.95 %) SMARCA4 ( 6.95 %) NLRP4 ( 6.34 %) FLNA ( 6.13 %) MYLK ( 6.13 %) ERBB3 ( 5.93 %) IQGAP2 ( 5.32 %) APAF1 ( 5.11 %) SMARCB1 ( 4.91 %) CHUK ( 4.70 %) IRS1 ( 4.50 %) MADD ( 4.29 %) MCC ( 4.29 %) PTK2 ( 4.09 %) SEC16A ( 4.09 %) BRINP1 ( 3.89 %) KTN1 ( 3.89 %) SMAD3 ( 3.89 %) P…	0.270783	0.722152	0.998771	0.270783	0.999907	0.591279	0.605371	0.674629	0.674629	0.754261	0.999988	0.790153	0.957483	0.826981	0.939612	0.97929	0.968996	1	0.886438	0.674629	1	0.971097	0.852252	0.882382	0.999997	0.778813	0.846976	0.890353	0.894134	0.82999	1	0.952763	1	1	0.914231	0.807776	1	0.980004	0.9228
FGFR1b Ligand Binding And Activation	48	6	31429	39.3457	31	-0.103535	0.953175	100	83.871	FGFR1 (3.89 %) FGF10 (1.02 %) FGF2 (1.02 %) FGF3 (1.02 %) FGF1 (0.61 %) FGF22 (0.20 %)	0.00597696	0.0240194	0.119464	0.00597696	0.161536	0.0168421	0.0174967	0.0210896	0.0210896	0.0262921	0.19358	0.0292064	0.0581873	0.0327564	0.051893	0.0709604	0.0638165	0.29768	0.040457	0.0210896	0.420468	0.0650629	0.0356514	0.0398176	0.216089	0.028236	0.0350088	0.0410959	0.0417344	0.0330785	0.26758	0.0563034	0.269042	0.391592	0.0455566	0.0308217	0.411325	0.071579	0.047462
Insulin Receptor Recycling// Ion Channel Transport// Transferrin Endocytosis And Recycling	362	31	161498	130.05	117	-0.0459244	0.955289	100	67.5214	INSR (4.29 %) TF (3.89 %) ATP6V1B1 (3.68 %) ATP6V0A4 (2.45 %) ATP6V0D2 (2.25 %) ATP6V1A (2.25 %) MCOLN1 (1.64 %) ATP6V0A2 (1.43 %) TFRC (1.43 %) ATP6AP1 (1.23 %) ATP6V0A1 (1.23 %) ATP6V1D (1.23 %) ATP6V1H (1.23 %) STEAP2 (1.23 %) TCIRG1 (1.23 %) ATP6V0D1 (1.02 %) ATP6V1C2 (1.02 %) ATP6V1E2 (1.02 %) STEAP3 (1.02 %) ATP6V1C1 (0.82 %) ATP6V1G2 (0.82 %) ATP6V1G3 (0.82 %) ATP6V0B (0.61 %) ATP6V0E2 (0.…	0.0298913	0.115802	0.474831	0.0298913	0.590111	0.0823908	0.0854796	0.102284	0.102284	0.126176	0.66349	0.139335	0.261749	0.155149	0.236432	0.311056	0.283816	0.832839	0.188652	0.102284	0.936809	0.28863	0.167872	0.185912	0.708417	0.134971	0.165061	0.191383	0.194105	0.156572	0.793275	0.254243	0.795356	0.919173	0.210246	0.14656	0.931598	0.313375	0.218194
Activated TAK1 Mediates P38 MAPK Activation	2	17	89062	86.4319	75	-0.0616127	0.955671	100	68	NOD2 (4.50 %) TAB3 (2.25 %) IRAK2 (1.84 %) MAP2K3 (1.84 %) MAP3K7 (1.64 %) MAPK14 (1.64 %) NOD1 (1.43 %) TAB2 (1.43 %) IRAK1 (1.02 %) MAP2K6 (1.02 %) MAPKAPK2 (1.02 %) MAPKAPK3 (1.02 %) RIPK2 (1.02 %) TRAF6 (0.82 %) IKBKG (0.41 %) TAB1 (0.41 %)	0.0163403	0.0646332	0.29506	0.0163403	0.383805	0.0456073	0.0473528	0.0568962	0.0568962	0.070607	0.446382	0.0782316	0.151897	0.0874656	0.136229	0.183134	0.165755	0.621344	0.107293	0.0568962	0.776703	0.168804	0.0949519	0.105657	0.487821	0.0756971	0.0932936	0.108925	0.110555	0.0883005	0.575057	0.147227	0.577385	0.744778	0.120271	0.0824404	0.766888	0.184628	0.125089
Intracellular Signalling Through Adenosine Receptor A2a And Adenosine// Intracellular Signalling Through Adenosine Receptor A2b And Adenosine	75	39	272781	159.035	145	-0.040126	0.956749	100	62.069	ADCY2 (6.34 %) RAPGEF2 (5.32 %) CHUK (4.70 %) ARHGEF7 (4.50 %) MAPK8 (2.86 %) PAK1 (2.66 %) AKT1 (2.25 %) MAP2K7 (2.25 %) NFKB1 (2.04 %) RPS6KA1 (1.84 %) IKBKB (1.64 %) ATF2 (1.43 %) NFKB2 (1.43 %) RAPGEF3 (1.43 %) ADORA2A (1.02 %) ELK1 (1.02 %) MAP2K6 (1.02 %) PRKACB (1.02 %) PRKCZ (1.02 %) ADORA2B (0.82 %) HRAS (0.82 %) PDPK1 (0.82 %) CDC42 (0.61 %) CREB1 (0.61 %) GNB1 (0.61 %) MAPK1 (0.61 %) J…	0.0414143	0.157629	0.592462	0.0414143	0.711495	0.112937	0.117096	0.139625	0.139625	0.171372	0.780843	0.188712	0.344897	0.209413	0.313375	0.405066	0.372028	0.917349	0.252764	0.139625	0.978698	0.377903	0.225957	0.249244	0.820522	0.182972	0.222311	0.256268	0.259755	0.211269	0.88887	0.335596	0.890426	0.96998	0.280336	0.198188	0.976211	0.407855	0.290412
NOTCH2 Activation And Transmission Of Signal To The Nucleus	280	21	127449	108.685	96	-0.0538994	0.959868	100	56.25	NOTCH2 (6.54 %) CNTN1 (4.91 %) JAG1 (3.07 %) MIB1 (2.45 %) JAG2 (2.25 %) DLL1 (1.84 %) ADAM10 (1.64 %) MIB2 (1.64 %) DLL4 (1.43 %) UBC (1.43 %) APH1B (1.23 %) NCSTN (1.23 %) PSEN2 (1.23 %) NEURL1 (0.61 %) UBA52 (0.61 %) APH1A (0.41 %) NEURL1B (0.41 %) PSENEN (0.41 %)	0.0227229	0.0890042	0.38602	0.0227229	0.4911	0.0630489	0.0654388	0.0784742	0.0784742	0.097111	0.561724	0.107428	0.205347	0.119878	0.184791	0.245881	0.223404	0.742011	0.146442	0.0784742	0.876515	0.227361	0.129935	0.144259	0.606804	0.104002	0.12771	0.148619	0.15079	0.121001	0.696976	0.199236	0.699289	0.851208	0.163704	0.113109	0.868877	0.247804	0.170087
P75NTR Negatively Regulates Cell Cycle Via SC1	94	6	34029	42.0495	33	-0.105247	0.96141	100	90.9091	NGFR (1.64 %) PRDM4 (1.64 %) HDAC2 (1.23 %) NGF (1.23 %) HDAC1 (1.02 %) HDAC3 (0.61 %)	0.00646981	0.0259804	0.128683	0.00646981	0.173668	0.0182226	0.0189304	0.0228142	0.0228142	0.028436	0.207806	0.031584	0.0628466	0.0354177	0.0560633	0.0766001	0.0689098	0.317913	0.0437296	0.0228142	0.446041	0.0702518	0.0385431	0.0430397	0.231719	0.0305358	0.0378495	0.044419	0.0451079	0.0357655	0.286207	0.0608167	0.28775	0.416095	0.049231	0.0333285	0.436573	0.0772658	0.0512859
Signaling By EGFR	118	7	64107	58.4311	48	-0.0854028	0.963069	100	77.0833	ADAM12 (3.68 %) LRIG1 (2.66 %) ADAM17 (2.45 %) ADAM10 (1.64 %) EGF (1.23 %) SRC (0.82 %)	0.00970836	0.0387927	0.187012	0.00970836	0.249272	0.0272629	0.0283167	0.0340925	0.0340925	0.0424325	0.2954	0.047092	0.0929502	0.0527562	0.0830645	0.112884	0.101756	0.437323	0.0649979	0.0340925	0.58843	0.103701	0.0573656	0.0639839	0.327123	0.0455414	0.0563432	0.0660109	0.0670228	0.0532695	0.397555	0.0899957	0.399511	0.554539	0.073071	0.0496709	0.577811	0.113845	0.0760805
Insulin Mediated Glucose Transport	359	30	191448	141.787	127	-0.0478313	0.969217	100	66.9291	PPP1R3A (7.36 %) PRKCI (4.50 %) INSR (4.29 %) LNPEP (4.09 %) TBC1D4 (3.48 %) GSK3B (3.27 %) AKT1 (2.25 %) AKT2 (1.64 %) SLC2A4 (1.64 %) STXBP4 (1.43 %) GYS1 (1.23 %) PRKCZ (1.02 %) TRIP10 (1.02 %) YWHAH (1.02 %) YWHAE (0.82 %) RHOQ (0.61 %) STX4 (0.61 %) YWHAB (0.61 %) YWHAZ (0.61 %) ASIP (0.41 %) PPP1CC (0.41 %) CALM2 (0.20 %) CALM3 (0.20 %) SFN (0.20 %) VAMP2 (0.20 %) YKT6 (0.20 %) YWHAG (0.20 …	0.0342979	0.131978	0.523197	0.0342979	0.641443	0.0941512	0.0976571	0.116698	0.116698	0.143679	0.714215	0.158492	0.294606	0.17625	0.266715	0.34851	0.318799	0.872183	0.213703	0.116698	0.958243	0.324062	0.1905	0.210648	0.757638	0.153583	0.187354	0.216747	0.219778	0.177845	0.836812	0.286352	0.8387	0.94458	0.237721	0.166611	0.954259	0.351031	0.246538
ERK Cascade ( B Cell Receptor Signaling )// ERK Cascade ( CD4 T Cell Receptor Signaling )// ERK Cascade ( FGF Signaling Pathway )// ERK Cascade ( GPCR Adenosine A2A Receptor Signaling Pathway )// ERK Cascade ( GPCR GroupI Metabotropic Glutamate Receptor Signaling Pathway )// ERK Cascade ( GPCR Signaling (G Alpha Q) )// ERK Cascade ( GPCR Signaling (G Alpha S// Epac And ERK) )// ERK Cascade ( IGF1…	39	8	49160	43.0646	33	-0.115606	0.974148	100	93.9394	RAF1 (2.66 %) ARAF (2.04 %) ELK1 (1.02 %) MAPK1 (0.61 %) MAPK3 (0.61 %) MAP2K2 (0.41 %)	0.00665778	0.0267276	0.132175	0.00665778	0.17825	0.0187488	0.0194768	0.0234714	0.0234714	0.0292527	0.213167	0.0324896	0.0646181	0.0364312	0.0576497	0.0787429	0.0708457	0.325478	0.0449753	0.0234714	0.455498	0.072224	0.0396441	0.0442662	0.2376	0.0314118	0.0389311	0.0456839	0.0463919	0.0367887	0.293188	0.062533	0.29476	0.425182	0.0506293	0.0342832	0.445917	0.0794264	0.0527409
Insulin Like Growth Factor 2 MRNA Binding Proteins (IGF2BPs/IMPs/VICKZs) Bind RNA	358	6	41927	49.894	39	-0.106983	0.976364	100	87.1795	IGF2BP1 (3.07 %) IGF2BP3 (1.64 %) IGF2 (1.43 %) CD44 (1.23 %) ACTB (0.82 %) IGF2BP2 (0.82 %)	0.00796543	0.0319133	0.1561	0.00796543	0.209455	0.0224043	0.0232726	0.0280345	0.0280345	0.0349194	0.249499	0.0387707	0.0768589	0.043457	0.0686194	0.0935227	0.0842121	0.375871	0.0536025	0.0280345	0.517008	0.0858382	0.0472743	0.0527612	0.277314	0.0374886	0.0464273	0.0544431	0.055283	0.0438819	0.339935	0.0743948	0.341692	0.48464	0.0603064	0.0409037	0.506817	0.0943279	0.062808
TGF Beta Signaling Pathway(through TAK1) ( TGF Beta Signaling(through TAK1) )	180	8	45559	48.8598	38	-0.109168	0.976937	100	76.3158	TGFBR1 (3.48 %) XIAP (2.04 %) MAP3K7 (1.64 %) TGFB2 (1.43 %) TGFB3 (0.61 %) TAB1 (0.41 %) TGFB1 (0.41 %)	0.00776256	0.0311101	0.15243	0.00776256	0.20469	0.0218377	0.0226843	0.0273275	0.0273275	0.0340419	0.243972	0.0377984	0.0749694	0.0423698	0.066925	0.0912441	0.08215	0.368303	0.0522685	0.0273275	0.507937	0.0837381	0.0460939	0.0514475	0.271288	0.0365479	0.0452675	0.0530887	0.0539083	0.0427843	0.332886	0.0725634	0.334617	0.47583	0.0588107	0.039879	0.497822	0.0920307	0.0612524
TGF Beta Receptor Signaling	177	53	386804	197.597	180	-0.0405071	0.978078	100	53.8889	SPTBN1 (5.11 %) ZFYVE9 (4.09 %) SMAD3 (3.89 %) WWP1 (3.68 %) ZFYVE16 (3.68 %) DAXX (3.48 %) TGFBR1 (3.48 %) RNF111 (3.07 %) SOS1 (3.07 %) DAB2 (2.86 %) NEDD4L (2.66 %) TFAP2B (2.66 %) SHC1 (2.45 %) TGFBR3 (2.45 %) GRB2 (2.25 %) PML (2.25 %) PPP1R15A (2.04 %) TGFBRAP1 (2.04 %) XIAP (2.04 %) AXIN1 (1.84 %) DACT2 (1.84 %) SMURF1 (1.84 %) EIF2A (1.64 %) MAP3K7 (1.64 %) RPS6KB1 (1.64 %) ITCH (1.43 %) …	0.0602881	0.222897	0.732768	0.0602881	0.839178	0.161535	0.167308	0.198357	0.198357	0.241463	0.892648	0.264684	0.463033	0.292102	0.424622	0.533947	0.495406	0.974403	0.348426	0.198357	0.996512	0.502331	0.313773	0.343909	0.919964	0.257024	0.309015	0.352912	0.357368	0.294543	0.960443	0.451787	0.961254	0.994225	0.383463	0.277276	0.995898	0.537156	0.396111
Regulation Of APC/C Activators Between G1/S And Early Anaphase	166	24	110851	98.3612	84	-0.0685446	0.979486	100	64.2857	CCNA1 (3.27 %) CDC27 (2.86 %) ANAPC4 (2.45 %) CDC23 (2.04 %) CCNB1 (1.64 %) FBXO5 (1.64 %) ANAPC1 (1.43 %) ANAPC2 (1.43 %) ANAPC5 (1.43 %) CDK1 (1.43 %) ANAPC7 (1.23 %) CDC16 (1.02 %) CDK2 (1.02 %) CCNA2 (0.82 %) FZR1 (0.82 %) UBE2E1 (0.82 %) ANAPC16 (0.61 %) CDC20 (0.61 %) UBE2C (0.61 %) ANAPC10 (0.20 %) CDC26 (0.20 %) UBE2D1 (0.20 %)	0.0196309	0.0772583	0.343449	0.0196309	0.441593	0.0546254	0.0567056	0.0680656	0.0680656	0.0843454	0.509111	0.0933775	0.179844	0.104296	0.161577	0.216058	0.195945	0.68921	0.127663	0.0680656	0.83539	0.199479	0.113131	0.12574	0.552984	0.0903767	0.111175	0.129583	0.131498	0.105282	0.642942	0.174406	0.645294	0.806672	0.142902	0.0983568	0.826644	0.217783	0.148548
FGFR1c Ligand Binding And Activation// Signaling By Activated Point Mutants Of FGFR1	49	12	56255	60.0956	48	-0.0976018	0.979775	100	70.8333	FGFR1 (3.89 %) ANOS1 (1.84 %) FGF23 (1.43 %) FGF5 (1.43 %) FGF2 (1.02 %) FGF20 (1.02 %) FGF6 (1.02 %) FGF8 (0.82 %) FGF1 (0.61 %) FGF17 (0.61 %) FGF9 (0.20 %)	0.0100627	0.0401866	0.193163	0.0100627	0.257126	0.0282486	0.02934	0.0353207	0.0353207	0.0439542	0.30439	0.0487765	0.0961901	0.0546375	0.0859764	0.116773	0.105285	0.449067	0.0673	0.0353207	0.601616	0.107293	0.0594059	0.0662513	0.336831	0.0471718	0.0583484	0.0683475	0.0693938	0.0551685	0.40865	0.093138	0.41064	0.567558	0.0756473	0.0514451	0.590956	0.117765	0.0787582
Interferon Gamma Signaling Pathway	230	29	194100	145.138	128	-0.0545723	0.984137	100	61.7188	JAK2 (9.82 %) JAK1 (4.09 %) MAPK10 (3.48 %) STAT1 (3.27 %) MAPK8 (2.86 %) MAPK9 (2.66 %) PIAS3 (2.04 %) SOCS5 (2.04 %) MAPK14 (1.64 %) IFNGR1 (1.43 %) MAPK15 (1.23 %) PIAS1 (1.23 %) IFNGR2 (1.02 %) MAPK13 (1.02 %) PIAS2 (1.02 %) SOCS6 (1.02 %) PTPN6 (0.82 %) SOCS3 (0.82 %) IFNG (0.61 %) MAPK1 (0.61 %) MAPK12 (0.61 %) MAPK3 (0.61 %) CISH (0.41 %) PIAS4 (0.41 %) SOCS2 (0.41 %) SOCS4 (0.20 %) SOCS7 …	0.0356201	0.136788	0.536861	0.0356201	0.655594	0.0976609	0.10129	0.120991	0.120991	0.148878	0.727928	0.164174	0.304205	0.182496	0.275591	0.359377	0.328989	0.882099	0.22109	0.120991	0.963138	0.334375	0.197188	0.217945	0.770755	0.159106	0.193946	0.224223	0.227343	0.184142	0.848023	0.295741	0.849849	0.950529	0.245801	0.172553	0.959476	0.361954	0.254865
Type II Interferon Signaling	240	23	74328	68.384	55	-0.0945919	0.984648	100	81.8182	STAT2 (2.25 %) IFNGR1 (1.43 %) IRF1 (1.23 %) HIST1H4L (1.02 %) IFNB1 (1.02 %) HIST1H4I (0.82 %) ICAM1 (0.82 %) PSMB9 (0.82 %) HIST1H4D (0.61 %) HIST4H4 (0.61 %) IRF8 (0.61 %) HIST1H4B (0.41 %) HIST1H4E (0.41 %) HIST1H4J (0.41 %) IFI6 (0.41 %) HIST1H4A (0.20 %) HIST1H4F (0.20 %) HIST1H4H (0.20 %)	0.0118995	0.047389	0.224346	0.0118995	0.296587	0.0333488	0.0346337	0.0416701	0.0416701	0.0518134	0.349245	0.0574718	0.112821	0.0643418	0.100942	0.136685	0.123378	0.506197	0.0791574	0.0416701	0.663565	0.125707	0.0699254	0.0779318	0.385011	0.0555894	0.0686874	0.0803814	0.0816038	0.0649638	0.463035	0.109274	0.465173	0.62926	0.088904	0.0606007	0.652883	0.137833	0.0925323
Gene Expression Of Smad6/7 By R Smad:smad4 ( TGF Beta Super Family Signaling Pathway(canonical) )// Gene Expression Of Smad7 By R Smad:smad4 ( TGF Beta Super Family Signaling Pathway(canonical) )	156	8	91417	49.8949	38	-0.118273	0.984869	100	94.7368	SMAD3 (3.89 %) SMAD1 (1.64 %) SMAD9 (1.43 %) SMAD5 (0.82 %) SMAD7 (0.41 %) SMAD6 (0.20 %)	0.00796562	0.031914	0.156103	0.00796562	0.209459	0.0224048	0.0232731	0.0280351	0.0280351	0.0349202	0.249505	0.0387716	0.0768607	0.043458	0.068621	0.0935249	0.0842141	0.375878	0.0536038	0.0280351	0.517017	0.0858402	0.0472754	0.0527624	0.277319	0.0374895	0.0464284	0.0544444	0.0552843	0.0438829	0.339941	0.0743965	0.341698	0.484648	0.0603078	0.0409046	0.506825	0.09433	0.0628095
RAF Independent MAPK1/3 Activation	113	13	62484	66.5544	53	-0.098901	0.98646	100	83.0189	DUSP16 (2.25 %) DUSP9 (1.84 %) DUSP7 (1.64 %) DUSP1 (1.43 %) DUSP6 (1.43 %) DUSP10 (1.23 %) DUSP4 (1.02 %) DUSP5 (0.61 %) MAPK1 (0.61 %) MAPK3 (0.61 %) DUSP8 (0.41 %) PEA15 (0.20 %)	0.0114835	0.0457612	0.217386	0.0114835	0.287831	0.0321951	0.0334363	0.0402346	0.0402346	0.0500377	0.339339	0.0555079	0.109079	0.0621509	0.0975717	0.132212	0.11931	0.49379	0.0764831	0.0402346	0.650427	0.121567	0.0675514	0.0752971	0.374407	0.053688	0.066354	0.0776675	0.0788504	0.0627525	0.451163	0.105642	0.453272	0.616095	0.085916	0.0585333	0.639724	0.133325	0.0894284
Aurora A Signaling	307	33	204072	146.137	128	-0.0575497	0.988316	100	59.375	BRCA1 (6.34 %) ARHGEF7 (4.50 %) RASA1 (3.89 %) GSK3B (3.27 %) TDRD7 (3.27 %) PAK1 (2.66 %) AKT1 (2.25 %) CKAP5 (2.04 %) DLGAP5 (2.04 %) CDC25B (1.84 %) MDM2 (1.84 %) AURKA (1.64 %) KPNA1 (1.64 %) TACC3 (1.64 %) TPX2 (1.64 %) CPEB1 (1.43 %) TACC1 (1.43 %) NDEL1 (1.23 %) PPP2R5D (1.23 %) GIT1 (1.02 %) RAN (1.02 %) CENPA (0.82 %) FZR1 (0.82 %) KPNB1 (0.82 %) AURKB (0.61 %) AJUBA (0.41 %) BIRC5 (0.41…	0.0360195	0.138237	0.540916	0.0360195	0.659762	0.0987195	0.102386	0.122285	0.122285	0.150444	0.731943	0.165884	0.307081	0.184376	0.278254	0.362628	0.33204	0.884944	0.22331	0.122285	0.964502	0.337463	0.1992	0.220138	0.77458	0.160769	0.195929	0.226469	0.229616	0.186036	0.851258	0.298556	0.853066	0.952199	0.248228	0.174341	0.960933	0.36522	0.257365
NRIF Signals Cell Death From The Nucleus	342	15	64504	65.8852	52	-0.102785	0.988487	100	78.8462	MAPK8 (2.86 %) NGFR (1.64 %) UBC (1.43 %) APH1B (1.23 %) NCSTN (1.23 %) NGF (1.23 %) PSEN2 (1.23 %) TRAF6 (0.82 %) UBA52 (0.61 %) APH1A (0.41 %) ITGB3BP (0.41 %) PSENEN (0.41 %) SQSTM1 (0.41 %)	0.0113328	0.0451713	0.21485	0.0113328	0.284634	0.0317771	0.0330025	0.0397144	0.0397144	0.049394	0.335715	0.0547959	0.10772	0.0613565	0.0963483	0.130586	0.117832	0.489222	0.075513	0.0397144	0.645545	0.120063	0.0666904	0.0743415	0.370523	0.0529987	0.0655077	0.076683	0.0778515	0.0619507	0.446801	0.104324	0.448899	0.611215	0.0848318	0.0577837	0.634838	0.131687	0.0883021
P38 MAPK Pathway	91	31	199922	133.767	116	-0.0618916	0.988838	100	65.5172	MAP2K4 (6.95 %) MEF2C (3.27 %) MAP3K5 (2.86 %) EEF2K (2.45 %) MAP3K10 (2.25 %) RPS6KA5 (2.25 %) MAP3K7 (1.64 %) MAPK14 (1.64 %) IL1R1 (1.43 %) TAB2 (1.43 %) DUSP10 (1.23 %) MKNK2 (1.23 %) RPS6KA4 (1.23 %) ELK1 (1.02 %) MAP2K6 (1.02 %) MAPK13 (1.02 %) MAPKAPK2 (1.02 %) MAPKAPK3 (1.02 %) SRF (0.82 %) TRAF6 (0.82 %) MAPK12 (0.61 %) MEF2D (0.61 %) MKNK1 (0.61 %) TAB1 (0.41 %) HSPB1 (0.20 %) MEF2B (0.…	0.0312499	0.120813	0.49022	0.0312499	0.60665	0.086027	0.0892455	0.106746	0.106746	0.131602	0.679996	0.145278	0.272023	0.161701	0.245884	0.322809	0.294772	0.846092	0.196447	0.106746	0.944375	0.29973	0.174904	0.193608	0.724549	0.140743	0.171988	0.199277	0.202096	0.163179	0.807789	0.264278	0.809812	0.928037	0.218807	0.152783	0.939567	0.325194	0.227031
Regulation Of TP53 Activity Through Methylation	169	19	177982	123.349	106	-0.0658285	0.988996	100	70.7547	EP300 (9.20 %) CHEK2 (5.73 %) EHMT1 (2.25 %) EHMT2 (2.04 %) L3MBTL1 (1.84 %) MDM2 (1.84 %) PRMT5 (1.43 %) UBC (1.43 %) MDM4 (1.23 %) TTC5 (1.23 %) KMT5A (1.02 %) SETD9 (0.82 %) JMY (0.61 %) SMYD2 (0.61 %) UBA52 (0.61 %)	0.0275271	0.107031	0.446989	0.0275271	0.559716	0.0760405	0.0789017	0.0944806	0.0944806	0.116672	0.632771	0.128914	0.243559	0.143647	0.219731	0.290156	0.264382	0.807049	0.174933	0.0944806	0.921141	0.268931	0.155516	0.17237	0.678122	0.124852	0.152893	0.177487	0.180035	0.144974	0.765413	0.236488	0.767586	0.901104	0.195152	0.135642	0.915179	0.292355	0.202606
TP53 Regulates Transcription Of Additional Cell Cycle Genes Whose Exact Role In The P53 Pathway Remain Uncertain	132	21	130395	105.324	88	-0.0780448	0.991989	100	69.3182	CENPJ (4.50 %) CNOT11 (3.68 %) TNKS1BP1 (3.27 %) CNOT10 (2.04 %) CNOT7 (1.84 %) CNOT3 (1.64 %) PLK2 (1.64 %) CDC25C (1.23 %) RQCD1 (1.23 %) CNOT2 (1.02 %) CNOT4 (1.02 %) CNOT6 (1.02 %) CNOT6L (1.02 %) PLAGL1 (0.82 %) CNOT8 (0.61 %) NPM1 (0.61 %) PLK3 (0.61 %) BTG2 (0.20 %) RGCC (0.20 %)	0.0216906	0.0850953	0.372108	0.0216906	0.475063	0.060242	0.062529	0.0750085	0.0750085	0.0928644	0.544799	0.102756	0.196913	0.1147	0.177105	0.236042	0.214333	0.725446	0.140211	0.0750085	0.864063	0.218152	0.124354	0.138113	0.589579	0.0994712	0.122218	0.142303	0.144391	0.115778	0.679894	0.191021	0.682225	0.8376	0.156808	0.108205	0.856052	0.237901	0.162949
Nef Mediated Downregulation Of MHC Class I Complex Cell Surface Expression	201	10	77108	79.6582	63	-0.10189	0.994581	100	74.6032	B2M (3.68 %) HLA-A (3.68 %) AP1G1 (2.66 %) AP1M1 (2.04 %) AP1S1 (2.04 %) PACS1 (1.23 %) AP1B1 (0.61 %) AP1M2 (0.61 %) AP1S2 (0.41 %) AP1S3 (0.41 %)	0.0146003	0.0579045	0.268117	0.0146003	0.350952	0.040816	0.0423822	0.0509509	0.0509509	0.0632777	0.410128	0.070141	0.136774	0.0784613	0.122551	0.165214	0.149377	0.579768	0.0963571	0.0509509	0.73774	0.152153	0.0852133	0.0948791	0.449706	0.0678588	0.0837172	0.0978326	0.0993057	0.0792139	0.534197	0.132532	0.536475	0.70451	0.108094	0.0739322	0.727472	0.166577	0.112456
MTOR Signaling Pathway	83	66	458106	222.983	200	-0.0472425	0.994707	100	54	MTOR (7.98 %) RB1CC1 (4.91 %) IRS1 (4.50 %) RICTOR (4.50 %) RPTOR (4.50 %) PPARGC1A (4.29 %) PLD1 (3.48 %) TSC2 (3.48 %) CLIP1 (3.27 %) FBXW11 (2.86 %) RAF1 (2.66 %) TSC1 (2.66 %) ULK1 (2.66 %) EEF2K (2.45 %) AKT1 (2.25 %) PML (2.25 %) ULK2 (2.25 %) BTRC (1.84 %) RPS6KA1 (1.84 %) SGK1 (1.84 %) IKBKB (1.64 %) PLD2 (1.64 %) PRKCA (1.64 %) RPS6KB1 (1.64 %) RRAGB (1.64 %) SREBF1 (1.64 %) PDCD4 (1.43 …	0.0751726	0.271621	0.809571	0.0751726	0.899409	0.19862	0.205548	0.242597	0.242597	0.293424	0.939472	0.320501	0.542273	0.352189	0.500751	0.61691	0.576681	0.990012	0.416292	0.242597	0.999184	0.583969	0.377014	0.411201	0.958151	0.311593	0.371581	0.421338	0.426341	0.354996	0.98274	0.530193	0.983184	0.998463	0.455463	0.335092	0.999	0.620222	0.469465
Downregulation Of TGF Beta Receptor Signaling	225	26	188270	118.135	99	-0.0767433	0.994797	100	65.6566	ZFYVE9 (4.09 %) SMAD3 (3.89 %) TGFBR1 (3.48 %) NEDD4L (2.66 %) USP15 (2.45 %) PPP1R15A (2.04 %) MTMR4 (1.84 %) SMURF1 (1.84 %) XPO1 (1.84 %) SMURF2 (1.43 %) UBC (1.43 %) PPP1CB (1.23 %) STUB1 (1.23 %) BAMBI (1.02 %) STRAP (1.02 %) UCHL5 (1.02 %) UBA52 (0.61 %) PPP1CA (0.41 %) PPP1CC (0.41 %) SMAD7 (0.41 %) TGFB1 (0.41 %)	0.0257618	0.100439	0.42529	0.0257618	0.535612	0.0712805	0.0739699	0.0886226	0.0886226	0.109523	0.608074	0.121068	0.229715	0.134975	0.20705	0.274173	0.249559	0.78528	0.16456	0.0886226	0.906991	0.253899	0.14619	0.162134	0.65352	0.117236	0.143711	0.166979	0.169391	0.136229	0.742239	0.222985	0.744472	0.885061	0.183719	0.127417	0.900431	0.276275	0.190789
Phosphorylation Of The APC/C	165	19	94846	87.5388	70	-0.0971026	0.995286	100	67.1429	CDC27 (2.86 %) PLK1 (2.86 %) ANAPC4 (2.45 %) CDC23 (2.04 %) CCNB1 (1.64 %) ANAPC1 (1.43 %) ANAPC2 (1.43 %) ANAPC5 (1.43 %) CDK1 (1.43 %) ANAPC7 (1.23 %) CDC16 (1.02 %) UBE2E1 (0.82 %) ANAPC16 (0.61 %) UBE2C (0.61 %) ANAPC10 (0.20 %) CDC26 (0.20 %) UBE2D1 (0.20 %)	0.0166334	0.0657628	0.299503	0.0166334	0.389177	0.0464126	0.0481882	0.0578947	0.0578947	0.0718369	0.45227	0.0795885	0.15442	0.0889748	0.138513	0.186117	0.168485	0.627936	0.109123	0.0578947	0.782676	0.171579	0.0965833	0.107461	0.493981	0.0770119	0.0948981	0.110782	0.112438	0.0898234	0.581583	0.149679	0.583916	0.751004	0.122307	0.083867	0.772947	0.187632	0.127201
P38MAPK Events	93	13	68562	61.0619	45	-0.132558	0.996645	100	80	RALGDS (1.84 %) MAPK14 (1.64 %) RALA (1.64 %) MAPK13 (1.02 %) MAPKAPK2 (1.02 %) MAPKAPK3 (1.02 %) HRAS (0.82 %) SRC (0.82 %) MAPK12 (0.61 %) RALB (0.61 %)	0.0102705	0.0410037	0.196751	0.0102705	0.261696	0.0288266	0.02994	0.0360407	0.0360407	0.0448461	0.309614	0.0497637	0.0980862	0.0557398	0.0876811	0.119047	0.107349	0.455845	0.0686484	0.0360407	0.609158	0.109395	0.0606013	0.0675794	0.342463	0.0481274	0.0595232	0.0697161	0.0707826	0.0562812	0.415066	0.0949772	0.417075	0.575021	0.0771559	0.0524848	0.598479	0.120057	0.0803261
Negative Regulation Of (transcription By R Smad:smad4) In TGF Beta Super Family Signaling Pathway ( TGF Beta Super Family Signaling Pathway(canonical) )	159	21	210376	130.964	110	-0.0757582	0.996686	100	69.0909	HDAC9 (5.32 %) SMAD3 (3.89 %) HDAC4 (2.86 %) TLE4 (2.86 %) HDAC5 (2.45 %) HDAC7 (2.04 %) SKIL (1.84 %) SMAD1 (1.64 %) TLE3 (1.64 %) HDAC6 (1.43 %) SMAD9 (1.43 %) TLE1 (1.43 %) HDAC2 (1.23 %) HDAC1 (1.02 %) TLE2 (1.02 %) SKI (0.82 %) SMAD5 (0.82 %) HDAC3 (0.61 %) HDAC8 (0.41 %)	0.0302221	0.117024	0.478618	0.0302221	0.594199	0.083277	0.0863975	0.103372	0.103372	0.1275	0.667583	0.140785	0.264263	0.156749	0.238743	0.313935	0.286498	0.836166	0.190556	0.103372	0.93874	0.291348	0.169589	0.187791	0.712428	0.136379	0.166752	0.193311	0.196057	0.158185	0.796905	0.256698	0.798972	0.921426	0.212338	0.148078	0.933629	0.316271	0.220354
TP53 Regulates Metabolic Genes	183	85	479684	231.326	206	-0.050358	0.997416	100	50.4854	MTOR (7.98 %) RPTOR (4.50 %) TP63 (4.29 %) TNRC6C (4.09 %) AGO1 (3.48 %) TNRC6A (3.48 %) TNRC6B (3.48 %) TSC2 (3.48 %) PRKAA2 (3.27 %) LRPPRC (3.07 %) MOV10 (3.07 %) G6PD (2.66 %) TSC1 (2.66 %) AGO3 (2.45 %) AKT1 (2.25 %) AGO4 (2.04 %) PRKAA1 (2.04 %) AKT3 (1.84 %) SESN2 (1.84 %) TXNRD1 (1.84 %) AKT2 (1.64 %) RRAGB (1.64 %) AGO2 (1.43 %) PRKAG2 (1.43 %) RRAGD (1.43 %) SESN3 (1.43 %) GLS2 (1.23 %)…	0.0805365	0.288603	0.831686	0.0805365	0.915215	0.211719	0.219039	0.258101	0.258101	0.311457	0.950876	0.339765	0.568138	0.372789	0.525908	0.643315	0.602919	0.992911	0.439219	0.258101	0.99952	0.610259	0.398575	0.433963	0.966956	0.330461	0.392938	0.444426	0.449586	0.375708	0.987241	0.55588	0.987593	0.999051	0.479549	0.354986	0.999402	0.646627	0.493914
Negative Regulation Of Gene Expression ( Insulin Receptor Signaling (D. Melanogaster) )// Negative Regulation Of Gene Expression ( Insulin Receptor Signaling (Mammal) )	371	7	55326	59.8151	43	-0.143342	0.997908	100	83.7209	FOXO4 (2.45 %) AKT1 (2.25 %) AKT3 (1.84 %) AKT2 (1.64 %) FOXO1 (1.64 %) FOXO3 (0.82 %)	0.0100026	0.0399504	0.192124	0.0100026	0.2558	0.0280816	0.0291666	0.0351126	0.0351126	0.0436964	0.302875	0.0484912	0.0956417	0.0543189	0.0854835	0.116115	0.104688	0.447094	0.0669101	0.0351126	0.599411	0.106686	0.0590604	0.0658673	0.335195	0.0468956	0.0580088	0.0679518	0.0689923	0.0548469	0.406783	0.0926062	0.408768	0.565378	0.0752111	0.0511446	0.588757	0.117102	0.0783048
DEx/H Box Helicases Activate Type I IFN And Inflammatory Cytokines Production	191	13	75134	77.7724	59	-0.119973	0.998137	100	72.8814	DHX36 (4.09 %) APP (2.66 %) DHX9 (2.04 %) NFKB1 (2.04 %) RELA (1.84 %) NFKB2 (1.43 %) MYD88 (0.82 %) AGER (0.61 %) SAA1 (0.61 %) HMGB1 (0.41 %) IRF7 (0.41 %) S100B (0.41 %)	0.0141317	0.0560866	0.260696	0.0141317	0.341821	0.0395233	0.041041	0.0493455	0.0493455	0.0612967	0.399979	0.067953	0.132661	0.0760245	0.118836	0.160328	0.144918	0.567827	0.0933932	0.0493455	0.726146	0.147618	0.0825764	0.0919584	0.438981	0.0657395	0.0811245	0.0948258	0.0962561	0.0767548	0.522553	0.128537	0.524813	0.692635	0.104791	0.0716306	0.715778	0.161655	0.109028
SUMOylation Of DNA Damage Response And Repair Proteins	328	76	581162	252.896	226	-0.0488336	0.998338	100	50	HERC2 (9.00 %) BRCA1 (6.34 %) STAG1 (5.32 %) RANBP2 (5.11 %) BLM (4.91 %) NUP205 (4.91 %) TPR (4.91 %) NUP188 (4.29 %) NUP210 (4.29 %) NUP214 (4.09 %) NUP133 (3.68 %) MDC1 (3.48 %) WRN (3.48 %) NUP93 (3.27 %) PARP1 (3.07 %) PHC2 (2.86 %) SMC5 (2.86 %) SP100 (2.86 %) CBX8 (2.66 %) PHC1 (2.66 %) SMC3 (2.45 %) NDC1 (2.25 %) NUP155 (2.25 %) NUP160 (2.25 %) PML (2.25 %) RING1 (2.25 %) SMC6 (2.25 %) XP…	0.0956029	0.334708	0.881466	0.0956029	0.947827	0.24777	0.256122	0.300428	0.300428	0.360205	0.972849	0.391556	0.633907	0.427796	0.590663	0.708803	0.668906	0.997323	0.499547	0.300428	0.999893	0.676218	0.455835	0.493928	0.983107	0.381281	0.449725	0.505104	0.510599	0.430982	0.994591	0.621437	0.994769	0.999759	0.54231	0.408305	0.999861	0.712036	0.557387
Oncogene Induced Senescence	211	30	213326	147.783	124	-0.0762021	0.998482	100	66.9355	TNRC6C (4.09 %) AGO1 (3.48 %) TNRC6A (3.48 %) TNRC6B (3.48 %) MOV10 (3.07 %) AGO3 (2.45 %) AGO4 (2.04 %) ETS1 (2.04 %) TFDP1 (2.04 %) MDM2 (1.84 %) SP1 (1.43 %) UBC (1.43 %) E2F2 (1.23 %) E2F3 (1.23 %) CDKN2A (1.02 %) ERF (1.02 %) ETS2 (1.02 %) CDK4 (0.82 %) CDK6 (0.61 %) CDKN2C (0.61 %) MAPK1 (0.61 %) MAPK3 (0.61 %) UBA52 (0.61 %) ID1 (0.41 %)	0.0366836	0.140642	0.547581	0.0366836	0.666584	0.100478	0.104205	0.124433	0.124433	0.153042	0.738492	0.168722	0.31184	0.187492	0.282662	0.367998	0.337084	0.889524	0.226988	0.124433	0.966659	0.342567	0.202535	0.223772	0.780801	0.163528	0.199216	0.230192	0.233382	0.189178	0.856489	0.303214	0.858265	0.954853	0.252247	0.177307	0.963242	0.370617	0.261504
Conversion From APC/C:Cdc20 To APC/C:Cdh1 In Late Anaphase	147	19	97016	89.0608	68	-0.117178	0.999053	100	72.0588	CDC27 (2.86 %) ANAPC4 (2.45 %) CDC14A (2.45 %) CDC23 (2.04 %) ANAPC1 (1.43 %) ANAPC2 (1.43 %) ANAPC5 (1.43 %) ANAPC7 (1.23 %) CDC16 (1.02 %) FZR1 (0.82 %) UBE2E1 (0.82 %) ANAPC16 (0.61 %) CDC20 (0.61 %) UBE2C (0.61 %) ANAPC10 (0.20 %) CDC26 (0.20 %) UBE2D1 (0.20 %)	0.0170403	0.0673297	0.30563	0.0170403	0.396562	0.0475303	0.0493475	0.0592802	0.0592802	0.0735428	0.460347	0.0814703	0.157913	0.0910674	0.141677	0.190242	0.172262	0.636904	0.11166	0.0592802	0.79071	0.175418	0.0988449	0.109962	0.502416	0.0788354	0.0971223	0.113355	0.115046	0.0919348	0.590484	0.153075	0.592823	0.759401	0.125128	0.0858451	0.781103	0.191787	0.130126
Negative Regulation Of (nuclear Import Of R Smad:smad4) In TGF Beta Super Family Signaling Pathway ( TGF Beta Super Family Signaling Pathway(canonical) )	158	11	80828	80.431	60	-0.127272	0.999106	100	78.3333	MAPK10 (3.48 %) MAPK8 (2.86 %) MAPK9 (2.66 %) MAPK14 (1.64 %) SMAD1 (1.64 %) MAPK7 (1.23 %) MAPK13 (1.02 %) MAPK1 (0.61 %) MAPK12 (0.61 %) MAPK3 (0.61 %)	0.0147942	0.0586563	0.271168	0.0147942	0.354696	0.0413508	0.0429371	0.0516149	0.0516149	0.0640968	0.41428	0.0710456	0.138472	0.0794685	0.124085	0.167229	0.151217	0.584616	0.0975816	0.0516149	0.742396	0.154024	0.0863031	0.0960859	0.454088	0.0687351	0.0847887	0.0990749	0.100566	0.0802304	0.538936	0.134181	0.541221	0.709292	0.109459	0.0748837	0.732173	0.168607	0.113872
P38 Cascade ( BMP2 Signaling(through TAK1) )// P38 Cascade ( TGF Beta Signaling(through TAK1) )// P38 Cascade ( Toll Like Receptor Signaling Pathway (p38 Cascade) )	233	8	49055	54.0826	36	-0.176755	0.999349	100	80.5556	MAP2K3 (1.84 %) MAP3K7 (1.64 %) MAPK14 (1.64 %) ATF2 (1.43 %) MAP2K6 (1.02 %) MAPK13 (1.02 %) MAPK12 (0.61 %)	0.00880523	0.0352326	0.171132	0.00880523	0.228888	0.0247473	0.0257052	0.0309568	0.0309568	0.0385451	0.271967	0.0427874	0.084644	0.047947	0.0756045	0.1029	0.0927039	0.406262	0.059108	0.0309568	0.552834	0.0944854	0.0521478	0.0581829	0.301747	0.0413754	0.0512159	0.0600321	0.0609554	0.0484147	0.368343	0.0819415	0.370202	0.519577	0.0664758	0.0451361	0.542387	0.103781	0.0692239
APC/C:Cdc20 Mediated Degradation Of Cyclin B	143	23	105079	91.3493	69	-0.121856	0.999464	100	66.6667	CDC27 (2.86 %) ANAPC4 (2.45 %) CDC23 (2.04 %) CCNB1 (1.64 %) ANAPC1 (1.43 %) ANAPC2 (1.43 %) ANAPC5 (1.43 %) CDK1 (1.43 %) UBC (1.43 %) ANAPC7 (1.23 %) CDC16 (1.02 %) UBE2E1 (0.82 %) ANAPC16 (0.61 %) CDC20 (0.61 %) UBA52 (0.61 %) UBE2C (0.61 %) ANAPC10 (0.20 %) CDC26 (0.20 %) UBE2D1 (0.20 %)	0.0176611	0.0697162	0.314877	0.0176611	0.407662	0.0492336	0.0511142	0.0613909	0.0613909	0.0761404	0.472444	0.0843349	0.163216	0.0942518	0.146483	0.196499	0.177994	0.650176	0.115517	0.0613909	0.802402	0.181243	0.102286	0.113765	0.515019	0.0816115	0.100507	0.117267	0.119013	0.095148	0.603704	0.158231	0.606051	0.771676	0.129416	0.088856	0.792991	0.198088	0.134572
Glycolysis	355	9	47160	54.8153	36	-0.182599	0.999569	100	91.6667	PKLR (2.25 %) GPI (1.23 %) HK2 (1.23 %) PGAM2 (0.82 %) ENO1 (0.61 %) PFKM (0.61 %) PGK1 (0.61 %) ALDOA (0.41 %) GAPDH (0.41 %)	0.00895515	0.0358242	0.173788	0.00895515	0.232308	0.0251651	0.026139	0.0314779	0.0314779	0.0391913	0.275909	0.043503	0.0860275	0.0487467	0.0768466	0.104564	0.0942123	0.411533	0.0600879	0.0314779	0.558946	0.0960212	0.0530156	0.059148	0.306023	0.0420679	0.0520686	0.0610268	0.0619649	0.049222	0.373286	0.0832829	0.375163	0.525563	0.0675734	0.0458901	0.548464	0.105459	0.0703651
SnoN Degradation Signaling ( TGF Beta Super Family Signaling Pathway(canonical) )// TGF Beta Receptor Complex Degradation Signaling ( TGF Beta Super Family Signaling Pathway(canonical) )// TGF Beta Receptor I Degradation Signaling ( TGF Beta Super Family Signaling Pathway(canonical) )	237	51	324185	173.309	145	-0.0774531	0.99961	100	62.7586	ACVR2A (5.73 %) BMPR1A (3.48 %) TGFBR1 (3.48 %) PSMD1 (3.07 %) ACVR2B (2.66 %) BMPR1B (2.25 %) PSMC3 (2.04 %) PSMB8 (1.84 %) PSMC5 (1.84 %) PSMD11 (1.84 %) SKIL (1.84 %) SMURF1 (1.84 %) ACVR1 (1.64 %) ACVRL1 (1.64 %) PSMD6 (1.64 %) PSMD13 (1.43 %) SMURF2 (1.43 %) PSMA2 (1.23 %) PSMC4 (1.23 %) AMHR2 (1.02 %) PSMA3 (1.02 %) PSMD12 (1.02 %) PSMD2 (1.02 %) PSMD3 (1.02 %) PSMD5 (1.02 %) PSMB9 (0.82 %)…	0.0479068	0.180529	0.647198	0.0479068	0.763727	0.129855	0.134588	0.160166	0.160166	0.196026	0.828276	0.21552	0.387939	0.238706	0.353626	0.452693	0.417261	0.94463	0.286941	0.160166	0.988523	0.423584	0.257165	0.283041	0.863809	0.209075	0.253102	0.29082	0.294678	0.240779	0.921924	0.377841	0.923191	0.982909	0.317388	0.226145	0.986953	0.45567	0.328468
Apoptosis Related Network Due To Altered Notch3 In Ovarian Cancer	332	5	36221	41.4116	24	-0.236911	0.999746	100	95.8333	VIM (1.8 %) RPS6KB1 (1.6 %) GCLC (1.4 %) TNF (0.2 %)	0.00635249	0.0255139	0.126497	0.00635249	0.170795	0.0178941	0.0185893	0.0224039	0.0224039	0.027926	0.204442	0.0310185	0.0617394	0.0347848	0.0550722	0.0752606	0.0676997	0.313149	0.0429515	0.0224039	0.440057	0.0690191	0.0378554	0.0422736	0.228026	0.0299887	0.0371739	0.0436289	0.0443059	0.0351265	0.281816	0.0597442	0.28334	0.410353	0.0483575	0.0327323	0.430662	0.0759151	0.0503769
DNA Damage Recognition In GG NER	310	38	193949	144.699	117	-0.0922783	0.999751	100	59.8291	DDB1 (3.07 %) PARP1 (3.07 %) INO80 (2.66 %) XPC (2.25 %) INO80E (2.04 %) NFRKB (2.04 %) CUL4B (1.84 %) MCRS1 (1.84 %) RUVBL1 (1.84 %) CUL4A (1.64 %) INO80D (1.64 %) ACTL6A (1.43 %) PARP2 (1.43 %) UBC (1.43 %) COPS2 (1.23 %) COPS3 (1.23 %) COPS7A (1.23 %) ACTR5 (1.02 %) COPS4 (1.02 %) COPS6 (1.02 %) RAD23A (1.02 %) ACTB (0.82 %) ACTR8 (0.82 %) RAD23B (0.82 %) UBA52 (0.61 %) CETN2 (0.41 %) COPS5 (0…	0.0354449	0.136152	0.535073	0.0354449	0.653751	0.0971965	0.100809	0.120423	0.120423	0.148191	0.726149	0.163423	0.30294	0.181671	0.274421	0.357947	0.327647	0.880831	0.220115	0.120423	0.962524	0.333018	0.196305	0.216981	0.769058	0.158376	0.193076	0.223236	0.226344	0.18331	0.846582	0.294504	0.848417	0.949779	0.244736	0.171768	0.95882	0.360517	0.253767
Chk1/Chk2(Cds1) Mediated Inactivation Of Cyclin B:Cdk1 Complex	146	12	59748	65.881	44	-0.175308	0.999851	100	70.4545	CHEK1 (2.45 %) WEE1 (2.45 %) CCNB1 (1.64 %) CDK1 (1.43 %) CDC25C (1.23 %) YWHAH (1.02 %) YWHAE (0.82 %) YWHAB (0.61 %) YWHAZ (0.61 %) SFN (0.20 %) YWHAG (0.20 %) YWHAQ (0.20 %)	0.0113319	0.0451676	0.214834	0.0113319	0.284614	0.0317745	0.0329998	0.0397111	0.0397111	0.04939	0.335693	0.0547915	0.107711	0.0613516	0.0963407	0.130576	0.117823	0.489193	0.0755069	0.0397111	0.645514	0.120054	0.066685	0.0743355	0.370499	0.0529944	0.0655024	0.0766768	0.0778453	0.0619457	0.446774	0.104315	0.448871	0.611184	0.084825	0.057779	0.634807	0.131676	0.088295
Cytokine Gene Transcription	223	11	69563	71.9759	49	-0.166991	0.999881	100	85.7143	MAPK8 (2.86 %) AKT1 (2.25 %) MAPK14 (1.64 %) PRKCA (1.64 %) IL3 (1.23 %) IL4 (1.02 %) IL13 (0.61 %) MAPK1 (0.61 %) TNF (0.20 %)	0.0127341	0.0506479	0.238132	0.0127341	0.31384	0.0356603	0.0370326	0.044545	0.044545	0.0553677	0.368684	0.0614015	0.120286	0.0687238	0.10767	0.145596	0.131489	0.530189	0.0845022	0.044545	0.688466	0.133959	0.0746723	0.0831976	0.405757	0.0593945	0.0733537	0.0858049	0.0871058	0.0693867	0.486094	0.11652	0.488284	0.654338	0.0948722	0.0647369	0.677864	0.146811	0.0987307
Signaling By NOTCH3// Signaling By NOTCH4	292	12	127875	113.035	85	-0.123793	0.999936	100	68.2353	NOTCH3 (5.93 %) NOTCH4 (3.68 %) JAG1 (3.07 %) JAG2 (2.25 %) DLL1 (1.84 %) ADAM10 (1.64 %) DLL4 (1.43 %) APH1B (1.23 %) NCSTN (1.23 %) PSEN2 (1.23 %) APH1A (0.41 %) PSENEN (0.41 %)	0.0240963	0.0941854	0.404074	0.0240963	0.511705	0.066775	0.0693007	0.0830707	0.0830707	0.102737	0.583296	0.113613	0.216445	0.126728	0.194919	0.25879	0.235326	0.762535	0.154671	0.0830707	0.891349	0.239459	0.137313	0.152377	0.628632	0.110002	0.134972	0.156959	0.159241	0.12791	0.718324	0.210048	0.720605	0.86758	0.172802	0.119598	0.884204	0.260797	0.1795
ERK/MAPK Targets	43	17	129146	107.794	80	-0.129505	0.999943	100	68.75	RPS6KA2 (4.91 %) MEF2C (3.27 %) RPS6KA3 (3.27 %) RPS6KA5 (2.25 %) RPS6KA1 (1.84 %) MAPK14 (1.64 %) MEF2A (1.43 %) MAPK7 (1.23 %) PPP2R5D (1.23 %) ELK1 (1.02 %) PPP2R1B (0.82 %) MAPK1 (0.61 %) MAPK3 (0.61 %) PPP2CA (0.61 %) PPP2CB (0.61 %)	0.0224468	0.08796	0.382328	0.0224468	0.486858	0.0622987	0.0646611	0.0775482	0.0775482	0.0959767	0.557258	0.10618	0.203099	0.118496	0.182742	0.243261	0.220987	0.737679	0.144779	0.0775482	0.8733	0.224907	0.128445	0.142619	0.602267	0.102792	0.126244	0.146933	0.149083	0.119607	0.692497	0.197046	0.694815	0.847682	0.161864	0.111799	0.865562	0.245167	0.168183
Negative Regulation Of MAPK Pathway	87	38	220828	142.545	112	-0.104733	0.999945	100	60.7143	KSR1 (3.68 %) RAF1 (2.66 %) DUSP16 (2.25 %) ARAF (2.04 %) PPP2R5A (2.04 %) DUSP9 (1.84 %) MARK3 (1.84 %) DUSP7 (1.64 %) PPP5C (1.64 %) DUSP1 (1.43 %) DUSP6 (1.43 %) PPP2R5E (1.43 %) UBC (1.43 %) DUSP10 (1.23 %) PPP2R5B (1.23 %) PPP2R5D (1.23 %) DUSP4 (1.02 %) PAQR3 (1.02 %) BRAP (0.82 %) HRAS (0.82 %) PPP2R1B (0.82 %) PPP2R5C (0.82 %) DUSP5 (0.61 %) MAPK1 (0.61 %) MAPK3 (0.61 %) PPP2CA (0.61 %) P…	0.0345944	0.133058	0.526295	0.0345944	0.644665	0.0949391	0.0984726	0.117662	0.117662	0.144847	0.717348	0.159769	0.296769	0.177654	0.268714	0.350961	0.321097	0.874475	0.215365	0.117662	0.959394	0.326387	0.192004	0.21229	0.760642	0.154824	0.188837	0.218428	0.22148	0.179261	0.839395	0.288467	0.841268	0.945973	0.23954	0.167946	0.955484	0.353495	0.248412
APC Truncation Mutants Have Impaired AXIN Binding// AXIN Missense Mutants Destabilize The Destruction Complex// Beta Catenin Phosphorylation Cascade// Misspliced GSK3beta Mutants Stabilize Beta Catenin// S33 Mutants Of Beta Catenin Aren't Phosphorylated// S37 Mutants Of Beta Catenin Aren't Phosphorylated// S45 Mutants Of Beta Catenin Aren't Phosphorylated// T41 Mutants Of Beta Catenin Aren't Phos…	142	17	113923	79.4086	54	-0.167474	0.999957	100	74.0741	GSK3B (3.27 %) PPP2R5A (2.04 %) AXIN1 (1.84 %) PPP2R5E (1.43 %) PPP2R5B (1.23 %) PPP2R5D (1.23 %) PPP2R1B (0.82 %) PPP2R5C (0.82 %) CSNK1A1 (0.61 %) PPP2CA (0.61 %) PPP2CB (0.61 %) FRAT1 (0.20 %)	0.0145378	0.0576625	0.267132	0.0145378	0.349743	0.0406439	0.0422036	0.0507371	0.0507371	0.063014	0.408786	0.0698498	0.136227	0.078137	0.122057	0.164565	0.148785	0.578196	0.0959628	0.0507371	0.736224	0.15155	0.0848625	0.0944905	0.448289	0.0675767	0.0833722	0.0974326	0.0989	0.0788867	0.532662	0.132	0.534938	0.702955	0.107655	0.0736259	0.725942	0.165923	0.112
Negative Regulation Of The PI3K/AKT Network	88	8	77068	70.3632	46	-0.184588	0.999959	100	82.6087	PHLPP1 (2.86 %) AKT1 (2.25 %) PHLPP2 (2.04 %) AKT3 (1.84 %) AKT2 (1.64 %) TRIB3 (0.82 %) THEM4 (0.61 %)	0.0123565	0.0491743	0.231923	0.0123565	0.306085	0.0346148	0.0359476	0.0432449	0.0432449	0.0537607	0.359959	0.059625	0.116916	0.0667431	0.104631	0.141574	0.127827	0.519478	0.082087	0.0432449	0.677433	0.130234	0.0725269	0.080818	0.396456	0.0576743	0.0712447	0.0833542	0.0846197	0.0673875	0.475783	0.113248	0.477951	0.643205	0.0921759	0.0628672	0.666789	0.142759	0.0959306
ErbB1 Downstream Signaling	34	105	714254	274.477	237	-0.063757	0.999976	100	43.4599	MTOR (7.98 %) MAP2K4 (6.95 %) IQGAP1 (5.52 %) RICTOR (4.50 %) VAV2 (3.89 %) DIAPH3 (3.68 %) KSR1 (3.68 %) PLD1 (3.48 %) GAB1 (3.27 %) MEF2C (3.27 %) RPS6KA3 (3.27 %) STAT1 (3.27 %) WASL (3.27 %) NCKAP1 (3.07 %) SOS1 (3.07 %) MAPK8 (2.86 %) PRKCD (2.86 %) MAPK9 (2.66 %) RAF1 (2.66 %) EGR1 (2.45 %) SLC9A1 (2.45 %) AKT1 (2.25 %) GRB2 (2.25 %) RPS6KA5 (2.25 %) CHN2 (2.04 %) CYFIP2 (2.04 %) STAT3 (2.0…	0.112621	0.384039	0.920794	0.112621	0.970147	0.287187	0.296588	0.346119	0.346119	0.412005	0.986269	0.446104	0.697246	0.485107	0.654262	0.769381	0.731342	0.999126	0.560935	0.346119	0.999981	0.738382	0.514967	0.555067	0.99219	0.434963	0.508485	0.566725	0.572439	0.488514	0.997984	0.684944	0.998062	0.99995	0.605176	0.464186	0.999974	0.772423	0.620592
P38 Signaling Mediated By MAPKAP Kinases	92	21	115110	103.749	74	-0.146754	0.999986	100	68.9189	TSC2 (3.48 %) ETV1 (2.66 %) RAF1 (2.66 %) CDC25B (1.84 %) MAPK14 (1.64 %) TCF3 (1.43 %) MAPKAPK2 (1.02 %) MAPKAPK3 (1.02 %) YWHAH (1.02 %) SRF (0.82 %) TH (0.82 %) YWHAE (0.82 %) CREB1 (0.61 %) LSP1 (0.61 %) YWHAB (0.61 %) YWHAZ (0.61 %) HSPB1 (0.20 %) SFN (0.20 %) YWHAG (0.20 %) YWHAQ (0.20 %)	0.0212155	0.0832923	0.365606	0.0212155	0.46752	0.0589486	0.0611881	0.0734105	0.0734105	0.0909051	0.536799	0.1006	0.193005	0.11231	0.173547	0.231475	0.210126	0.717477	0.137331	0.0734105	0.857923	0.213881	0.121777	0.135273	0.581407	0.0973801	0.119682	0.139384	0.141432	0.113367	0.67172	0.187216	0.674058	0.830932	0.153619	0.105942	0.849741	0.233304	0.159647
Adrenaline//noradrenaline Inhibits Insulin Secretion	349	28	151079	119.458	88	-0.132731	0.999988	100	56.8182	CACNA1C (6.34 %) ADCY5 (5.32 %) CACNA1D (4.91 %) ADCY6 (2.25 %) CACNB2 (2.25 %) CACNA2D2 (1.84 %) GNB4 (1.64 %) GNG12 (1.43 %) ADRA2A (1.23 %) GNB3 (1.23 %) GNAI1 (1.02 %) CACNB3 (0.61 %) GNB1 (0.61 %) GNB5 (0.61 %) GNG7 (0.61 %) GNAI2 (0.41 %) GNB2 (0.41 %) GNG3 (0.41 %) ADRA2C (0.20 %) GNG11 (0.20 %) GNG4 (0.20 %) GNGT1 (0.20 %)	0.0262036	0.102092	0.430795	0.0262036	0.541762	0.0724733	0.0752058	0.0900912	0.0900912	0.111316	0.614402	0.123037	0.233201	0.137152	0.210241	0.278204	0.253294	0.790945	0.167166	0.0900912	0.910751	0.257687	0.148532	0.164705	0.659844	0.119147	0.146016	0.16962	0.172066	0.138424	0.748242	0.226384	0.75046	0.889303	0.186593	0.129481	0.904344	0.28033	0.193761
Regulation Of Cytoplasmic And Nuclear SMAD2/3 Signaling	234	20	176226	103.059	72	-0.155754	0.999995	100	79.1667	NUP214 (4.09 %) SMAD3 (3.89 %) NUP153 (2.04 %) TGFBRAP1 (2.04 %) PPM1A (1.43 %) CTDSPL (1.02 %) KPNB1 (0.82 %) UBE2I (0.82 %) CTDSP1 (0.61 %) CTDSP2 (0.61 %) KPNA2 (0.61 %) MAPK1 (0.61 %) MAPK3 (0.61 %) PIAS4 (0.41 %) CALM2 (0.20 %) CALM3 (0.20 %)	0.021009	0.0825076	0.36276	0.021009	0.464208	0.0583859	0.0606047	0.0727152	0.0727152	0.0900524	0.533279	0.0996617	0.191301	0.111269	0.171995	0.229482	0.208291	0.713941	0.136076	0.0727152	0.855169	0.212018	0.120654	0.134036	0.577806	0.0964699	0.118577	0.138112	0.140143	0.112316	0.668102	0.185557	0.670443	0.82795	0.152229	0.104956	0.846913	0.231298	0.158208
Cell Cycle	14	14	69394	73.7253	46	-0.204859	0.999995	100	86.9565	PSMD11 (1.84 %) PSMD13 (1.43 %) CCNE1 (1.23 %) PSMD12 (1.02 %) PSMD3 (1.02 %) RPA3 (0.82 %) CCND2 (0.61 %) CCNE2 (0.61 %) PSMD14 (0.61 %) CCND3 (0.41 %) PSMD4 (0.41 %) PSMD7 (0.41 %) PSME3 (0.41 %) CINP (0.20 %)	0.0131493	0.0522659	0.244902	0.0131493	0.322269	0.0368088	0.0382244	0.0459728	0.0459728	0.0571318	0.378142	0.0633514	0.123979	0.0708973	0.111	0.149996	0.135498	0.541694	0.0871509	0.0459728	0.700164	0.138037	0.077026	0.0858073	0.415821	0.0612828	0.0756676	0.0884924	0.089832	0.0715803	0.4972	0.120105	0.499413	0.666181	0.0978283	0.0667889	0.68962	0.151246	0.1018
AKT(PKB) Activation Signaling ( IGF1 Signaling Pathway )// AKT(PKB) Activation Signaling ( Insulin Receptor Signaling (D. Melanogaster) )// AKT(PKB) Activation Signaling ( PDGF Signaling Pathway )	4	7	70244	66.7889	40	-0.222644	0.999996	100	80	AKT1 (2.25 %) PIK3CD (2.25 %) AKT3 (1.84 %) AKT2 (1.64 %) PIK3CB (1.02 %) PDPK1 (0.82 %)	0.0115365	0.0459686	0.218275	0.0115365	0.288952	0.0323421	0.0335889	0.0404175	0.0404175	0.050264	0.340608	0.0557582	0.109556	0.0624302	0.0980015	0.132783	0.119829	0.495387	0.076824	0.0404175	0.652128	0.122095	0.067854	0.075633	0.375767	0.0539303	0.0666514	0.0780135	0.0792014	0.0630344	0.452689	0.106105	0.454802	0.617797	0.0862969	0.0587968	0.641427	0.1339	0.0898242
APC Cdc20 Mediated Degradation Of Nek2A// APC/C:Cdc20 Mediated Degradation Of Mitotic Proteins// Inactivation Of APC/C Via Direct Inhibition Of The APC/C Complex	141	25	120209	101.316	70	-0.160578	0.999996	100	67.1429	CDC27 (2.86 %) ANAPC4 (2.45 %) BUB1B (2.04 %) CDC23 (2.04 %) ANAPC1 (1.43 %) ANAPC2 (1.43 %) ANAPC5 (1.43 %) UBC (1.43 %) ANAPC7 (1.23 %) CDC16 (1.02 %) BUB3 (0.82 %) UBE2E1 (0.82 %) ANAPC16 (0.61 %) CDC20 (0.61 %) UBA52 (0.61 %) UBE2C (0.61 %) MAD2L1 (0.41 %) NEK2 (0.41 %) ANAPC10 (0.20 %) CDC26 (0.20 %) UBE2D1 (0.20 %)	0.020492	0.0805409	0.355579	0.020492	0.45583	0.0569762	0.0591432	0.0709729	0.0709729	0.0879146	0.524351	0.0973082	0.18702	0.108658	0.1681	0.224471	0.20368	0.704899	0.132928	0.0709729	0.848041	0.207335	0.117838	0.130931	0.568655	0.0941878	0.115806	0.134921	0.136909	0.109683	0.658874	0.18139	0.66122	0.820253	0.14874	0.102485	0.839599	0.226253	0.154595
MAPK6/MAPK4 Signaling	82	90	573633	258.171	212	-0.0855709	1	100	48.5849	KALRN (7.57 %) TNRC6C (4.09 %) PSME4 (3.89 %) PAK3 (3.68 %) AGO1 (3.48 %) MAPK6 (3.48 %) NCOA3 (3.48 %) RAG1 (3.48 %) TNRC6A (3.48 %) TNRC6B (3.48 %) IGF2BP1 (3.07 %) MMP2 (3.07 %) MOV10 (3.07 %) PSMD1 (3.07 %) PAK1 (2.66 %) AGO3 (2.45 %) CDC14A (2.45 %) PAK2 (2.25 %) AGO4 (2.04 %) PSMC3 (2.04 %) MMP10 (1.84 %) PRKACG (1.84 %) PSMB8 (1.84 %) PSMC5 (1.84 %) PSMD11 (1.84 %) XPO1 (1.84 %) FOXO1 (1.6…	0.099571	0.346467	0.892027	0.099571	0.954152	0.257083	0.265691	0.31128	0.31128	0.372587	0.976813	0.404642	0.649656	0.441605	0.606354	0.724107	0.68454	0.997934	0.51448	0.31128	0.999928	0.691808	0.470134	0.508788	0.98587	0.394144	0.463923	0.520105	0.525665	0.444849	0.995696	0.637191	0.995844	0.999832	0.557699	0.421738	0.999906	0.727304	0.572895
TRAIL Signaling	345	7	50793	51.4424	24	-0.33111	1	100	91.6667	CASP10 (1.43 %) TNFRSF10A (1.43 %) TNFRSF10B (1.23 %) CFLAR (0.61 %) TNFSF10 (0.61 %) FADD (0.20 %)	0.00827249	0.0331279	0.161626	0.00827249	0.216615	0.0232614	0.0241625	0.0291037	0.0291037	0.0362463	0.257792	0.0402409	0.0797123	0.0451007	0.0711789	0.0969616	0.0873254	0.387156	0.0556187	0.0291037	0.530425	0.0890086	0.0490586	0.0547467	0.286343	0.0389112	0.0481805	0.05649	0.0573604	0.0455413	0.350464	0.0771606	0.35226	0.497696	0.0625663	0.042453	0.520129	0.0977948	0.0651584
Trk Receptor Signaling Mediated By The MAPK Pathway	137	34	221130	145.071	103	-0.148742	1	100	66.0194	MEF2C (3.27 %) PRKCD (2.86 %) RAF1 (2.66 %) EGR1 (2.45 %) EHD4 (2.25 %) RPS6KA5 (2.25 %) MAP2K3 (1.84 %) MAP3K2 (1.84 %) RPS6KA1 (1.84 %) MAPK14 (1.64 %) RIT2 (1.64 %) MAP2K5 (1.43 %) MAPK7 (1.23 %) ELK1 (1.02 %) FOS (1.02 %) MAP2K6 (1.02 %) MAPKAPK2 (1.02 %) CDK5R1 (0.82 %) HRAS (0.82 %) SRF (0.82 %) CREB1 (0.61 %) MAPK1 (0.61 %) MAPK3 (0.61 %) NTF3 (0.61 %) CDK5 (0.41 %) RAP1A (0.41 %) RAP1B (0…	0.035593	0.13669	0.536586	0.035593	0.65531	0.0975892	0.101216	0.120903	0.120903	0.148772	0.727654	0.164058	0.304009	0.182369	0.275411	0.359157	0.328782	0.881904	0.220939	0.120903	0.963044	0.334166	0.197052	0.217796	0.770494	0.158993	0.193812	0.22407	0.227189	0.184013	0.847801	0.29555	0.849629	0.950414	0.245637	0.172431	0.959375	0.361732	0.254695
APC/C:Cdc20 Mediated Degradation Of Securin// APC/C:Cdh1 Mediated Degradation Of Cdc20 And Other APC/C:Cdh1 Targeted Proteins In Late Mitosis/early G1// Autodegradation Of Cdh1 By Cdh1:APC/C// Cdc20:Phospho APC/C Mediated Degradation Of Cyclin A	144	77	374303	205.573	158	-0.11431	1	100	53.1646	PSME4 (3.89 %) CCNA1 (3.27 %) PSMD1 (3.07 %) CDC27 (2.86 %) PLK1 (2.86 %) ANAPC4 (2.45 %) BUB1B (2.04 %) CDC23 (2.04 %) PSMC3 (2.04 %) PSMB8 (1.84 %) PSMC5 (1.84 %) PSMD11 (1.84 %) AURKA (1.64 %) PSMD6 (1.64 %) ANAPC1 (1.43 %) ANAPC2 (1.43 %) ANAPC5 (1.43 %) CDK1 (1.43 %) PSMA8 (1.43 %) PSMD13 (1.43 %) UBC (1.43 %) ANAPC7 (1.23 %) PSMA2 (1.23 %) PSMC4 (1.23 %) PSMC6 (1.23 %) PSMF1 (1.23 %) CDC16 …	0.0647414	0.237725	0.758395	0.0647414	0.860133	0.172744	0.178874	0.211783	0.211783	0.25731	0.909474	0.281754	0.487945	0.310539	0.448412	0.560351	0.521096	0.980654	0.369403	0.211783	0.997736	0.528166	0.333231	0.364696	0.934006	0.273697	0.328254	0.374076	0.378713	0.313098	0.969093	0.476392	0.969774	0.996105	0.405827	0.294984	0.997304	0.563609	0.418936
Regulation Of RAS By GAPs	117	67	397302	200.299	151	-0.122702	1	100	52.9801	PSME4 (3.89 %) RASA1 (3.89 %) RASA2 (3.68 %) DAB2IP (3.48 %) RASAL2 (3.27 %) PSMD1 (3.07 %) SYNGAP1 (2.86 %) PSMC3 (2.04 %) RASA3 (2.04 %) SPRED2 (2.04 %) PSMB8 (1.84 %) PSMC5 (1.84 %) PSMD11 (1.84 %) CUL3 (1.64 %) KBTBD7 (1.64 %) PSMD6 (1.64 %) RASAL1 (1.64 %) SPRED1 (1.64 %) PSMA8 (1.43 %) PSMD13 (1.43 %) RASAL3 (1.43 %) UBC (1.43 %) PSMA2 (1.23 %) PSMC4 (1.23 %) PSMC6 (1.23 %) PSMF1 (1.23 %) P…	0.0617747	0.22787	0.741598	0.0617747	0.846489	0.165287	0.17118	0.202856	0.202856	0.246782	0.898577	0.270418	0.471468	0.298301	0.432663	0.542919	0.504118	0.976684	0.355494	0.202856	0.99698	0.511095	0.32032	0.350911	0.924948	0.262623	0.315487	0.360044	0.364562	0.300782	0.963566	0.460113	0.964332	0.994935	0.391008	0.283227	0.996433	0.546146	0.403816
[truncated: 4 more rows]
[truncated: 450 more columns]

## Sheet: GBM.csv
Pathway	Internal Id	n.genes.in.rep	total Exonic Content Block length	(E)xpected n.mut in path	(O)bserved n.mut in path	log10 (oddRatio=(O/E))	pval	% FDR	ExclusiveCoverage	Mutated Genes	prob Br02X	prob Br03X	prob Br04X	prob Br05X	prob Br06X	prob Br07X	prob Br08X	prob Br104X	prob Br10P	prob Br118X	prob Br11P	prob Br12P	prob Br132X	prob Br13X	prob Br148X	prob Br14X	prob Br15X	prob Br16X	prob Br17X	prob Br20P	prob Br230T	prob Br232T	prob Br23X	prob Br25X	prob Br26X	prob Br27P	prob Br29P	prob Br306T	prob Br9PT	prob TCGA-02-0003-01A-01D-1490-08	prob TCGA-02-0033-01A-01D-1490-08	prob TCGA-02-0047-01A-01D-1490-08	prob TCGA-02-0055-01A-01D-1490-08	prob TCGA-02-2470-01A-01D-1494-08	prob TCGA-02-2483-01A-01D-1494-08	prob TCGA-02-2485-01A-01D-1494-08	prob TCGA-02-2486-01A-01D-1494-08	prob TCGA-06-0119-01A-08D-1490-08	prob TCGA-06-0122-01A-01D-1490-08
[truncated: 185 more rows]
[truncated: 280 more columns]

[truncated: 7 more sheets: HNSC.csv, KIRC.csv, LUAD.csv, OV.csv, PRAD.csv, SKCM.csv, THCA.csv]
